# Supplementary material for: Stereoselective Synthesis and Antiproliferative Activity of Steviol-Based Diterpene 1,3-Aminoalcohol Regioisomers
Source: MDPI journal article supplement (doi:10.3390/molecules28247962), 2023-12-05

**Supporting informations**  
**for**  
**Stereoselective Synthesis and Antiproliferative**  
**Activity of Steviol-Based Diterpene 1,3-Aminoalcohol**  
**Regioisomers**

**Dorottya Bai<sup>1</sup>, Zsuzsanna Schelz<sup>2</sup>, Mária Fanni Boncz<sup>1</sup>, István Zupkó<sup>2,3</sup>, and Zsolt Szakonyi<sup>1,3,\*</sup>**

<sup>1</sup> Interdisciplinary Excellence Center, Institute of Pharmaceutical Chemistry, University of Szeged, Eötvös utca 6, H-6720 Szeged, Hungary; baidorottya@gmail.com; bonczmaria@gmail.com

<sup>2</sup> Department of Pharmacodynamics and Biopharmacy, University of Szeged, Eötvös utca 6, H-6720 Szeged, Hungary; schelz.zsuzsanna@szte.hu; zupko.istvan@szte.hu

<sup>3</sup> Interdisciplinary Centre of Natural Products, University of Szeged, Eötvös utca 6, H-6720 Szeged, Hungary

\* Correspondence: szakonyi.zsolt@szte.hu; Tel.: +36-62-546809

## Contents

|                                                                                                                         |           |
|-------------------------------------------------------------------------------------------------------------------------|-----------|
| Table S1. Antiproliferative effects of the investigated compounds                                                       | 3 – 4     |
| Concentration–response curves of compound <b>16</b> , <b>17</b> , <b>23</b> and <b>32</b>                               | 5         |
| <sup>1</sup> H, <sup>13</sup> C, <sup>19</sup> F NMR, COSY, NOESY, HSQC, HMBC spectra of compounds <b>3</b> - <b>36</b> | 6 - 213   |
| HRMS spectra of compounds <b>3</b> - <b>36</b>                                                                          | 214 - 247 |

Table S1. Antiproliferative effects of the investigated compounds

| Comp. | Cc.<br>( $\mu$ M) | Growth inhibition (%) $\pm$ SEM and calculated IC <sub>50</sub> values ( $\mu$ M)* |                  |                  |                  |                  |                  |
|-------|-------------------|------------------------------------------------------------------------------------|------------------|------------------|------------------|------------------|------------------|
|       |                   | HeLa                                                                               | SiHa             | MCF-7            | MDA-MB-231       | A2780            | NIH/3T3          |
| 6     | 10                | 23.23 $\pm$ 1.97                                                                   | < 20             | 36.44 $\pm$ 3.48 | 25.84 $\pm$ 2.49 | 24.82 $\pm$ 5.19 | 22.06 $\pm$ 1.54 |
|       | 30                | 93.94 $\pm$ 0.55                                                                   | 68.24 $\pm$ 0.61 | 98.58 $\pm$ 0.22 | 97.60 $\pm$ 0.67 | 82.50 $\pm$ 4.66 | 98.27 $\pm$ 0.37 |
| 7     | 10                | 24.87 $\pm$ 2.49                                                                   | < 20             | 43.12 $\pm$ 3.79 | 28.03 $\pm$ 1.84 | 27.03 $\pm$ 4.31 | < 20             |
|       | 30                | 96.89 $\pm$ 0.54                                                                   | 88.56 $\pm$ 2.01 | 99.33 $\pm$ 0.24 | 97.67 $\pm$ 0.67 | 91.63 $\pm$ 1.97 | 97.76 $\pm$ 0.70 |
| 8     | 10                | < 20                                                                               | < 20             | 45.43 $\pm$ 1.94 | < 20             | 20.30 $\pm$ 2.05 | 25.69 $\pm$ 0.97 |
|       | 30                | 97.49 $\pm$ 0.52                                                                   | 95.34 $\pm$ 1.23 | 98.90 $\pm$ 0.18 | 97.89 $\pm$ 0.66 | 98.25 $\pm$ 0.40 | 98.27 $\pm$ 0.37 |
| 9     | 10                | < 20                                                                               | < 20             | 79.84 $\pm$ 1.59 | 57.99 $\pm$ 2.59 | 73.56 $\pm$ 2.61 | < 20             |
|       | 30                | 95.35 $\pm$ 0.58                                                                   | 85.99 $\pm$ 2.92 | 98.07 $\pm$ 0.35 | 93.42 $\pm$ 0.39 | 99.01 $\pm$ 0.11 | 93.88 $\pm$ 1.94 |
| 10    | 10                | 41.90 $\pm$ 4.29                                                                   | < 20             | 86.52 $\pm$ 0.88 | 78.67 $\pm$ 2.63 | 38.96 $\pm$ 1.87 | 20.31 $\pm$ 2.93 |
|       | 30                | 97.65 $\pm$ 0.64                                                                   | 97.61 $\pm$ 0.90 | 100.0 $\pm$ 0.20 | 98.09 $\pm$ 0.59 | 98.38 $\pm$ 0.51 | 96.59 $\pm$ 1.10 |
| 11    | 10                | < 20                                                                               | < 20             | 49.48 $\pm$ 3.06 | < 20             | 74.25 $\pm$ 2.10 | 22.16 $\pm$ 2.22 |
|       | 30                | 94.48 $\pm$ 0.84                                                                   | 83.71 $\pm$ 3.19 | 96.94 $\pm$ 0.57 | 90.78 $\pm$ 1.35 | 98.12 $\pm$ 0.30 | 93.61 $\pm$ 2.02 |
| 12    | 10                | < 20                                                                               | < 20             | 48.62 $\pm$ 0.50 | < 20             | 64.73 $\pm$ 1.95 | 29.23 $\pm$ 1.33 |
|       | 30                | 90.80 $\pm$ 3.71                                                                   | 82.43 $\pm$ 2.09 | 92.35 $\pm$ 2.89 | 91.59 $\pm$ 2.36 | 98.32 $\pm$ 0.23 | 95.53 $\pm$ 0.49 |
| 13    | 10                | < 20                                                                               | 24.18 $\pm$ 3.46 | 56.73 $\pm$ 3.88 | < 20             | 83.65 $\pm$ 1.95 | < 20             |
|       | 30                | 92.34 $\pm$ 2.70                                                                   | 87.92 $\pm$ 1.62 | 96.84 $\pm$ 0.55 | 94.30 $\pm$ 1.83 | 99.02 $\pm$ 0.39 | 96.88 $\pm$ 0.74 |
| 14    | 10                | 24.62 $\pm$ 2.79                                                                   | 34.15 $\pm$ 2.53 | 78.87 $\pm$ 4.11 | 53.21 $\pm$ 2.44 | 93.33 $\pm$ 1.99 | 50.36 $\pm$ 2.91 |
|       | 30                | 95.13 $\pm$ 1.60                                                                   | 88.88 $\pm$ 0.87 | 97.44 $\pm$ 0.53 | 94.95 $\pm$ 1.24 | 99.57 $\pm$ 0.35 | 97.15 $\pm$ 0.60 |
| 15    | 10                | < 20                                                                               | < 20             | 53.99 $\pm$ 3.39 | 31.33 $\pm$ 1.89 | 89.51 $\pm$ 1.76 | < 20             |
|       | 30                | 94.88 $\pm$ 2.04                                                                   | 87.89 $\pm$ 1.33 | 97.43 $\pm$ 0.59 | 94.23 $\pm$ 0.98 | 99.67 $\pm$ 0.49 | 96.50 $\pm$ 0.77 |
| 16    | 10                | 55.42 $\pm$ 2.81                                                                   | 80.05 $\pm$ 1.41 | 80.95 $\pm$ 2.03 | 84.43 $\pm$ 2.92 | 97.64 $\pm$ 2.81 | < 20             |
|       | 30                | 95.69 $\pm$ 1.12                                                                   | 89.39 $\pm$ 1.03 | 97.95 $\pm$ 0.56 | 93.61 $\pm$ 1.23 | 100.3 $\pm$ 0.57 | 96.83 $\pm$ 0.66 |
|       | IC <sub>50</sub>  | 3.40                                                                               | 6.33             | 3.88             | 4.51             | 4.43             | 17.44            |
| 17    | 10                | 90.55 $\pm$ 1.34                                                                   | 83.33 $\pm$ 1.58 | 86.31 $\pm$ 2.86 | 91.46 $\pm$ 1.24 | 100.6 $\pm$ 0.76 | 20.50 $\pm$ 1.70 |
|       | 30                | 93.53 $\pm$ 2.50                                                                   | 86.66 $\pm$ 1.74 | 97.42 $\pm$ 0.71 | 95.03 $\pm$ 0.91 | 100.0 $\pm$ 0.91 | 96.54 $\pm$ 0.62 |
|       | IC <sub>50</sub>  | 3.51                                                                               | 5.37             | 2.47             | 5.62             | 4.06             | 8.70             |
| 19    | 10                | 31.57 $\pm$ 1.34                                                                   | < 20             | < 20             | < 20             | < 20             | < 20             |
|       | 30                | 46.86 $\pm$ 0.27                                                                   | < 20             | 38.02 $\pm$ 1.36 | < 20             | 41.72 $\pm$ 1.99 | < 20             |
| 20    | 10                | < 20                                                                               | < 20             | < 20             | < 20             | < 20             | < 20             |
|       | 30                | < 20                                                                               | < 20             | 30.71 $\pm$ 0.93 | < 20             | 27.04 $\pm$ 2.25 | < 20             |
| 22    | 10                | 59.22 $\pm$ 6.61                                                                   | 69.00 $\pm$ 2.02 | 90.56 $\pm$ 0.98 | 90.95 $\pm$ 0.40 | 69.51 $\pm$ 3.98 | 49.04 $\pm$ 1.37 |
|       | 30                | 90.87 $\pm$ 0.35                                                                   | 80.80 $\pm$ 2.91 | 94.23 $\pm$ 0.82 | 89.66 $\pm$ 0.28 | 96.04 $\pm$ 0.45 | 94.25 $\pm$ 0.45 |
| 23    | 10                | 70.14 $\pm$ 1.97                                                                   | 68.12 $\pm$ 1.85 | 95.81 $\pm$ 0.84 | 92.99 $\pm$ 0.39 | 79.97 $\pm$ 1.60 | 81.84 $\pm$ 3.07 |
|       | 30                | 90.41 $\pm$ 0.78                                                                   | 80.48 $\pm$ 3.16 | 95.33 $\pm$ 1.05 | 91.40 $\pm$ 0.39 | 95.71 $\pm$ 0.58 | 93.62 $\pm$ 0.77 |
|       | IC <sub>50</sub>  | 5.07                                                                               | 4.41             | 1.59             | 3.28             | 4.39             | 5.15             |
| 24    | 10                | < 20                                                                               | < 20             | 34.80 $\pm$ 1.99 | < 20             | < 20             | 21.83 $\pm$ 2.15 |
|       | 30                | 96.56 $\pm$ 0.88                                                                   | 78.10 $\pm$ 1.56 | 93.61 $\pm$ 0.94 | 97.59 $\pm$ 1.01 | 99.28 $\pm$ 0.52 | 97.69 $\pm$ 0.87 |
| 25    | 10                | < 20                                                                               | < 20             | 40.09 $\pm$ 1.44 | < 20             | < 20             | < 20             |
|       | 30                | 32.24 $\pm$ 2.88                                                                   | < 20             | 78.81 $\pm$ 1.52 | 69.28 $\pm$ 1.96 | 73.83 $\pm$ 0.57 | 93.70 $\pm$ 1.11 |
| 26    | 10                | 49.50 $\pm$ 1.23                                                                   | 63.39 $\pm$ 0.91 | 90.70 $\pm$ 1.57 | 87.61 $\pm$ 0.59 | 61.39 $\pm$ 1.45 | 25.74 $\pm$ 1.93 |
|       | 30                | 93.63 $\pm$ 1.56                                                                   | 86.89 $\pm$ 1.69 | 97.49 $\pm$ 0.53 | 93.09 $\pm$ 1.53 | 98.21 $\pm$ 0.43 | 95.62 $\pm$ 0.96 |
| 27    | 10                | < 20                                                                               | < 20             | 79.62 $\pm$ 2.89 | 67.25 $\pm$ 1.94 | 59.04 $\pm$ 1.68 | < 20             |
|       | 30                | 96.38 $\pm$ 0.83                                                                   | 86.89 $\pm$ 2.27 | 97.63 $\pm$ 0.31 | 93.69 $\pm$ 0.42 | 98.92 $\pm$ 0.22 | 93.97 $\pm$ 1.64 |
| 28    | 10                | 46.83 $\pm$ 1.44                                                                   | 63.43 $\pm$ 2.66 | 90.63 $\pm$ 0.54 | 88.00 $\pm$ 0.54 | 60.10 $\pm$ 2.24 | < 20             |
|       | 30                | 94.66 $\pm$ 0.63                                                                   | 86.13 $\pm$ 3.79 | 97.75 $\pm$ 0.39 | 92.92 $\pm$ 1.04 | 98.53 $\pm$ 0.42 | 93.97 $\pm$ 1.95 |
| 29    | 10                | < 20                                                                               | < 20             | 32.51 $\pm$ 0.92 | < 20             | 21.89 $\pm$ 0.73 | < 20             |
|       | 30                | 92.17 $\pm$ 0.38                                                                   | 79.47 $\pm$ 2.33 | 93.08 $\pm$ 0.30 | 95.30 $\pm$ 0.97 | 74.95 $\pm$ 1.79 | 32.03 $\pm$ 1.30 |
| 30    | 10                | 40.79 $\pm$ 0.99                                                                   | < 20             | 79.51 $\pm$ 1.01 | 50.73 $\pm$ 3.21 | 33.06 $\pm$ 1.23 | 21.47 $\pm$ 0.48 |
|       | 30                | 94.51 $\pm$ 0.19                                                                   | 101.40 $\pm$ 0.6 | 95.63 $\pm$ 0.55 | 98.70 $\pm$ 0.49 | 99.71 $\pm$ 0.27 | 100.70 $\pm$ 0.2 |
| 31    | 10                | < 20                                                                               | < 20             | 72.69 $\pm$ 3.15 | 49.47 $\pm$ 3.47 | 37.30 $\pm$ 1.04 | < 20             |
|       | 30                | 96.02 $\pm$ 0.89                                                                   | 95.68 $\pm$ 0.81 | 99.42 $\pm$ 0.23 | 96.82 $\pm$ 0.65 | 97.52 $\pm$ 0.80 | 97.62 $\pm$ 0.71 |
| 32    | 10                | 97.09 $\pm$ 0.79                                                                   | 95.59 $\pm$ 2.12 | 99.59 $\pm$ 0.13 | 97.12 $\pm$ 0.60 | 97.94 $\pm$ 0.60 | 96.93 $\pm$ 0.92 |

|             |                  |              |              |              |              |              |              |
|-------------|------------------|--------------|--------------|--------------|--------------|--------------|--------------|
|             | 30               | 97.18 ± 0.76 | 96.46 ± 1.09 | 99.88 ± 0.23 | 96.32 ± 1.02 | 98.01 ± 0.60 | 96.61 ± 1.05 |
|             | IC <sub>50</sub> | 3.09         | 5.77         | 1.04         | 2.30         | 3.78         | 3.71         |
| <b>33</b>   | 10               | < 20         | < 20         | 57.13 ± 2.13 | < 20         | 41.14 ± 1.23 | 54.53 ± 1.93 |
|             | 30               | 23.94 ± 5.01 | < 20         | 60.27 ± 3.65 | < 20         | 51.53 ± 1.41 | 78.89 ± 2.52 |
| <b>34</b>   | 10               | < 20         | < 20         | 37.49 ± 2.10 | < 20         | 31.77 ± 1.60 | < 20         |
|             | 30               | 75.20 ± 1.26 | 58.82 ± 2.24 | 81.29 ± 2.02 | 50.12 ± 2.41 | 89.59 ± 0.45 | 72.46 ± 0.96 |
| <b>35</b>   | 10               | < 20         | < 20         | 69.95 ± 3.11 | < 20         | 43.21 ± 1.63 | 54.79 ± 1.40 |
|             | 30               | 88.11 ± 0.75 | 81.41 ± 2.84 | 88.79 ± 0.44 | 92.44 ± 0.59 | 97.37 ± 0.38 | 93.02 ± 1.01 |
| <b>36</b>   | 10               | < 20         | < 20         | 45.89 ± 3.40 | < 20         | 29.33 ± 1.68 | < 20         |
|             | 30               | 89.32 ± 0.63 | 79.36 ± 3.17 | 91.80 ± 0.74 | 91.38 ± 0.65 | 96.31 ± 0.53 | 92.91 ± 0.87 |
| Cisplatin** | 10               | 42.61 ± 2.33 | 60.98 ± 0.92 | 53.03 ± 2.29 | 67.51 ± 1.01 | 83.57 ± 1.21 | 73.88 ± 1.63 |
|             | 30               | 99.93 ± 0.26 | 88.95 ± 0.53 | 86.90 ± 1.22 | 87.75 ± 1.10 | 95.02 ± 0.28 | 97.10 ± 0.15 |

\*: for selected outstandingly active compounds; \*\*: data from reference  
10.3390/ijms24021121 (Bai D, Int J Mol Sci 2023, Lit. 24 in manuscript)



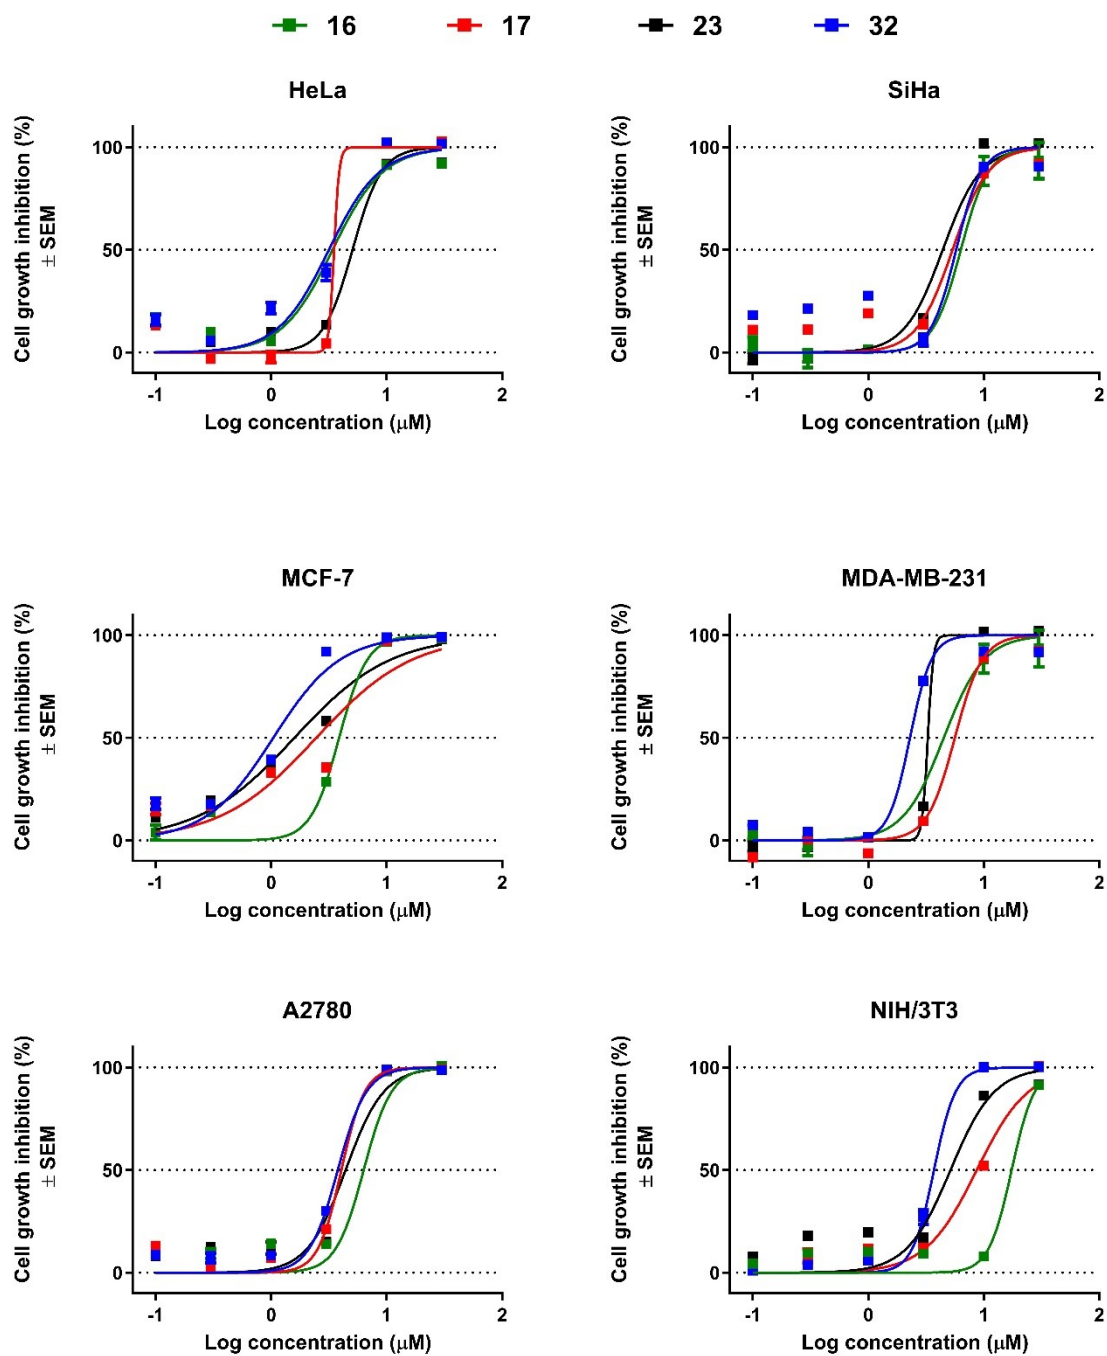

Figure S1 Concentration–response curves of *antiproliferative* activity for compound **16**, **17**, **23** and **32**

$^1\text{H}$ -NMR of compound (2'S,4R,4aS,6aS,11aR,11bS)-methyl 9-hydroxy-4,11b-dimethyldodecahydro-1H-spiro[6a,9-methanocyclohepta[a]naphthalene-8,2'-oxirane]-4-carboxylate (**3**)

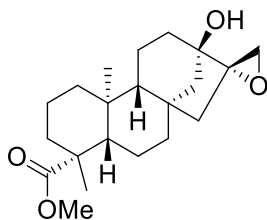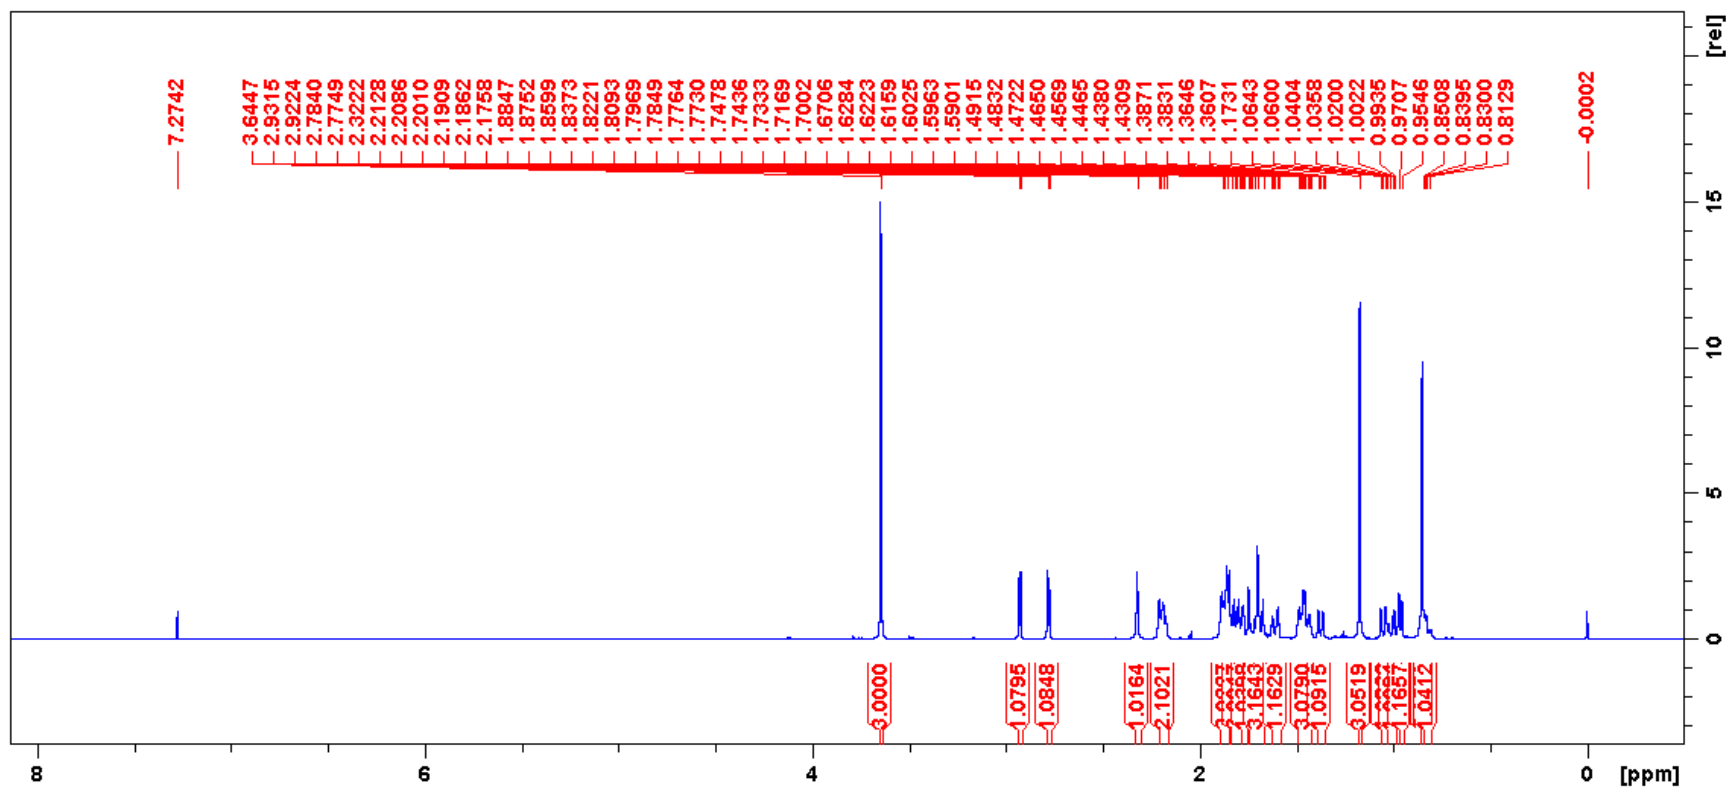

$^{13}\text{C}$ -NMR of compound (2'S,4R,4aS,6aS,11aR,11bS)-methyl 9-hydroxy-4,11b-dimethyldodecahydro-1H-spiro[6a,9-methanocyclohepta[a]naphthalene-8,2'-oxirane]-4-carboxylate (**3**)

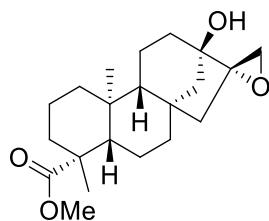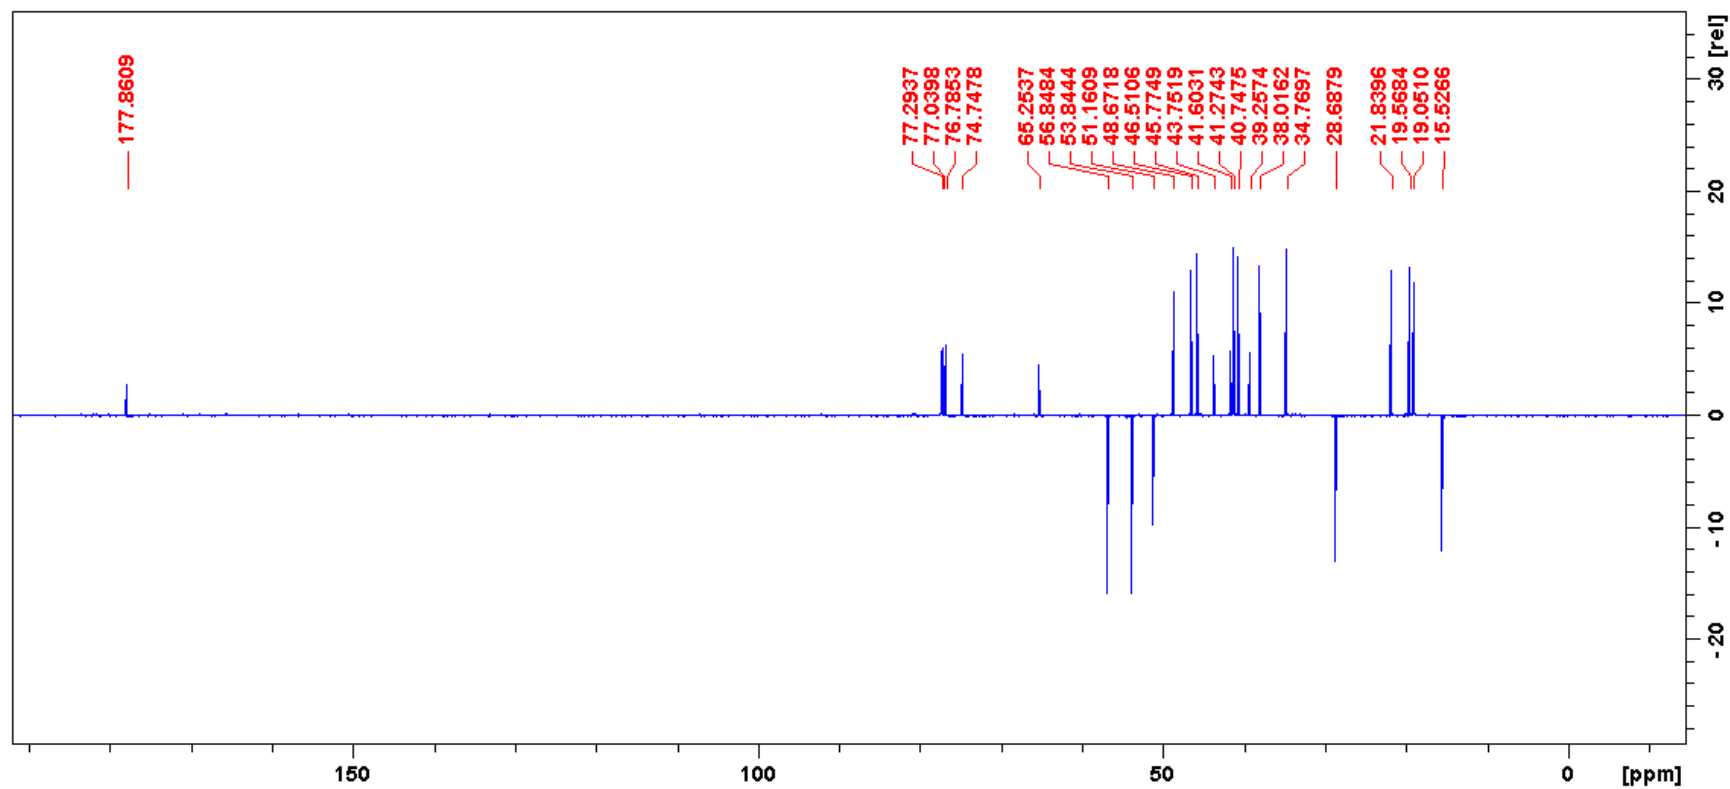

COSY of compound (2'S,4R,4aS,6aS,11aR,11bS)-methyl 9-hydroxy-4,11b-dimethyldodecahydro-1H-spiro[6a,9-methanocyclohepta[a]naphthalene-8,2'-oxirane]-4-carboxylate (**3**)

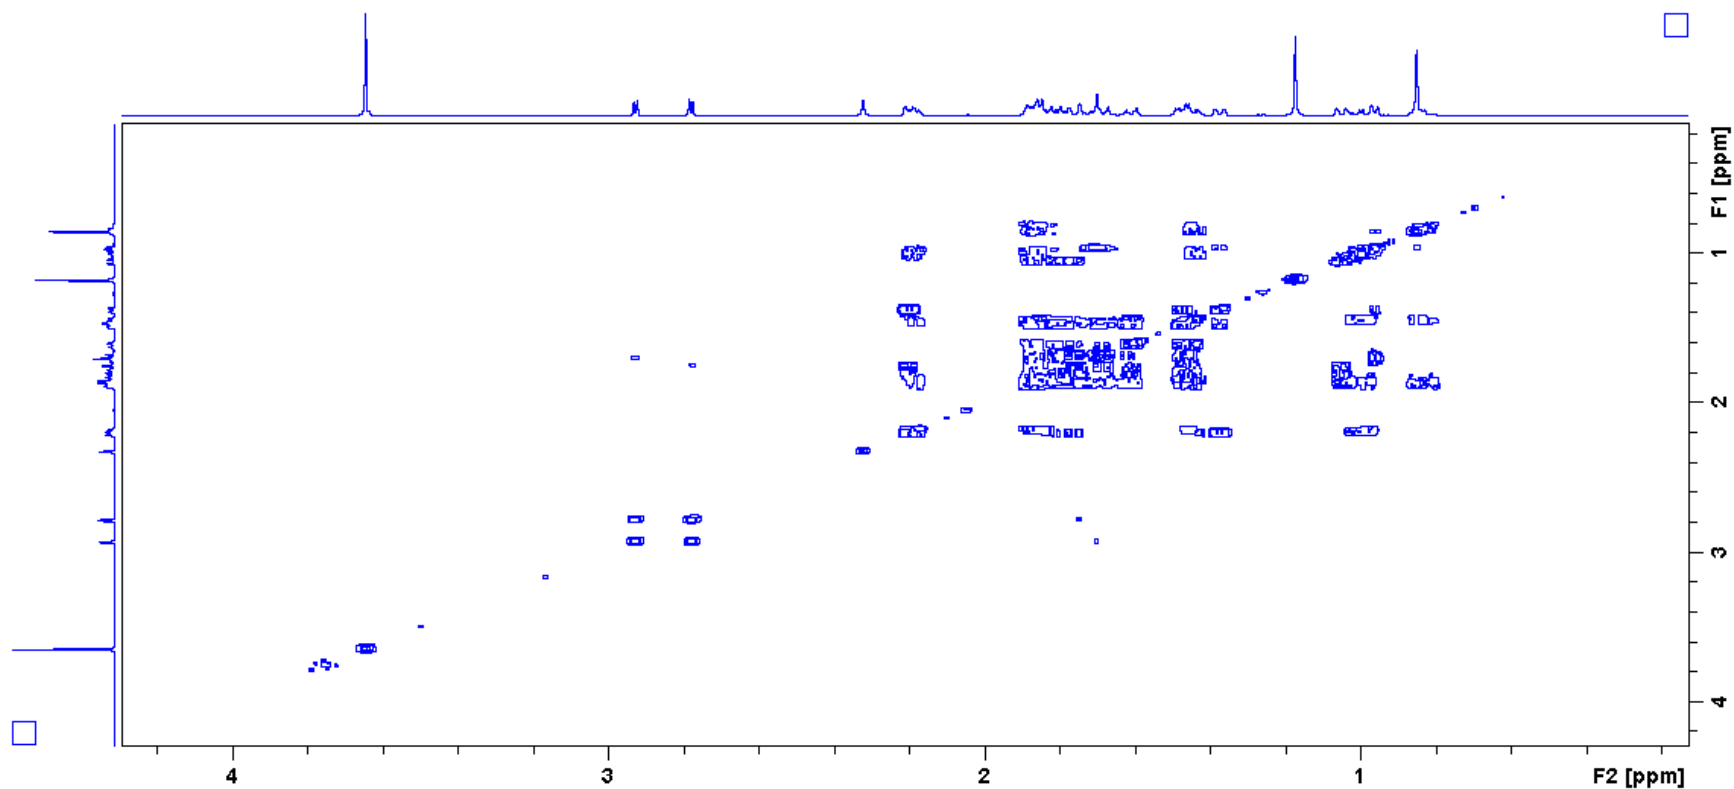

NOESY of compound (2'S,4R,4aS,6aS,11aR,11bS)-methyl 9-hydroxy-4,11b-dimethyldodecahydro-1H-spiro[6a,9-methanocyclohepta[a]naphthalene-8,2'-oxirane]-4-carboxylate (**3**)

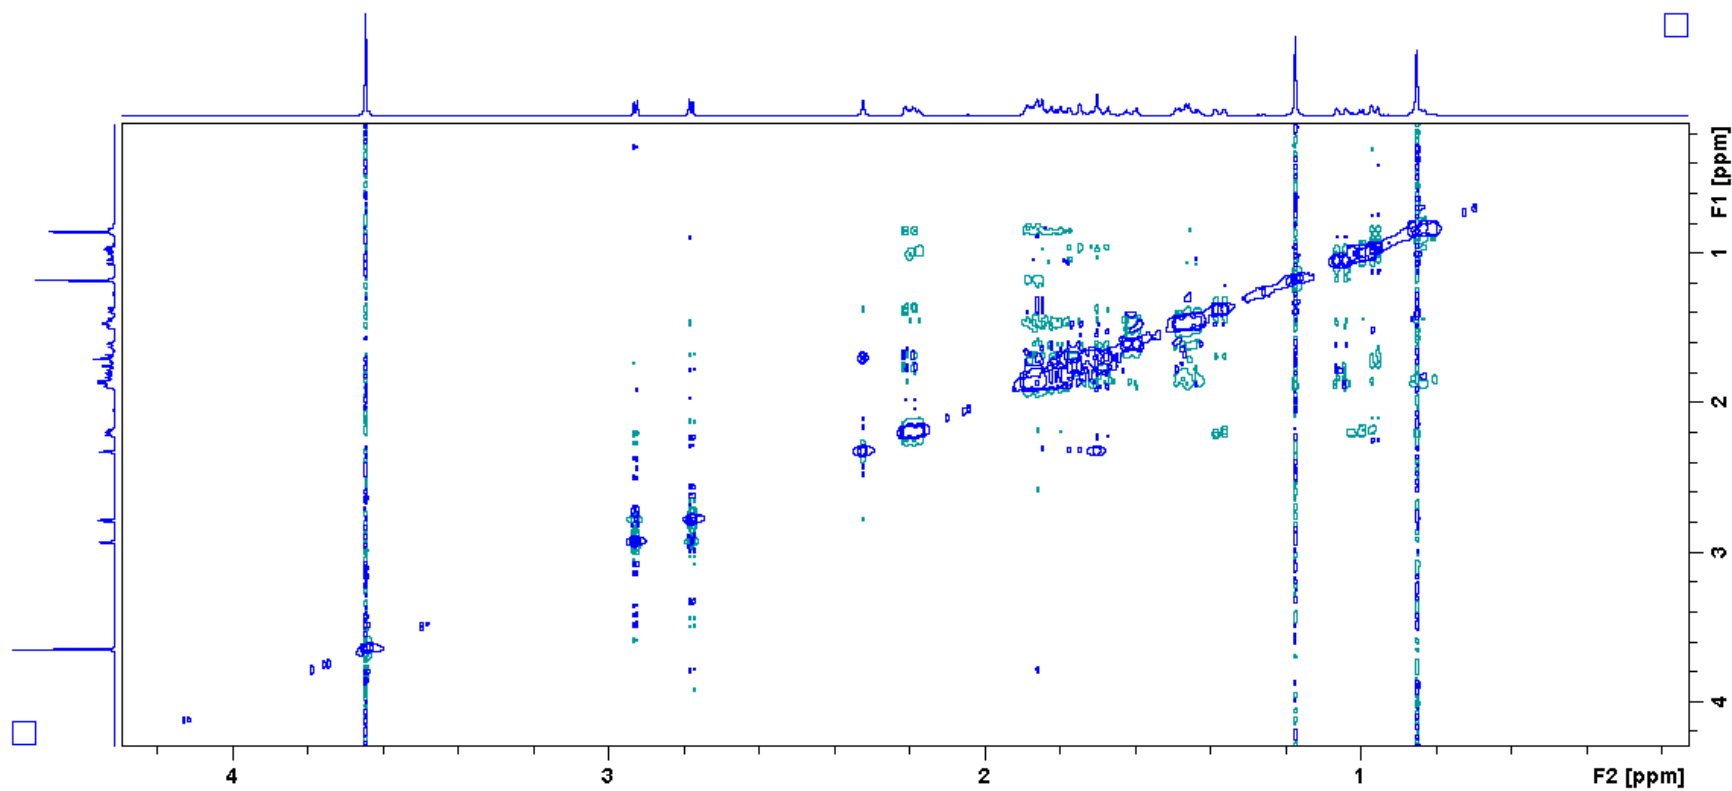

HSQC of compound (2'*S*,4*R*,4*aS*,6*aS*,11*aR*,11*bS*)-methyl 9-hydroxy-4,11b-dimethyldodecahydro-1*H*-spiro[6*a*,9-methanocyclohepta[*a*]naphthalene-8,2'-oxirane]-4-carboxylate (**3**)

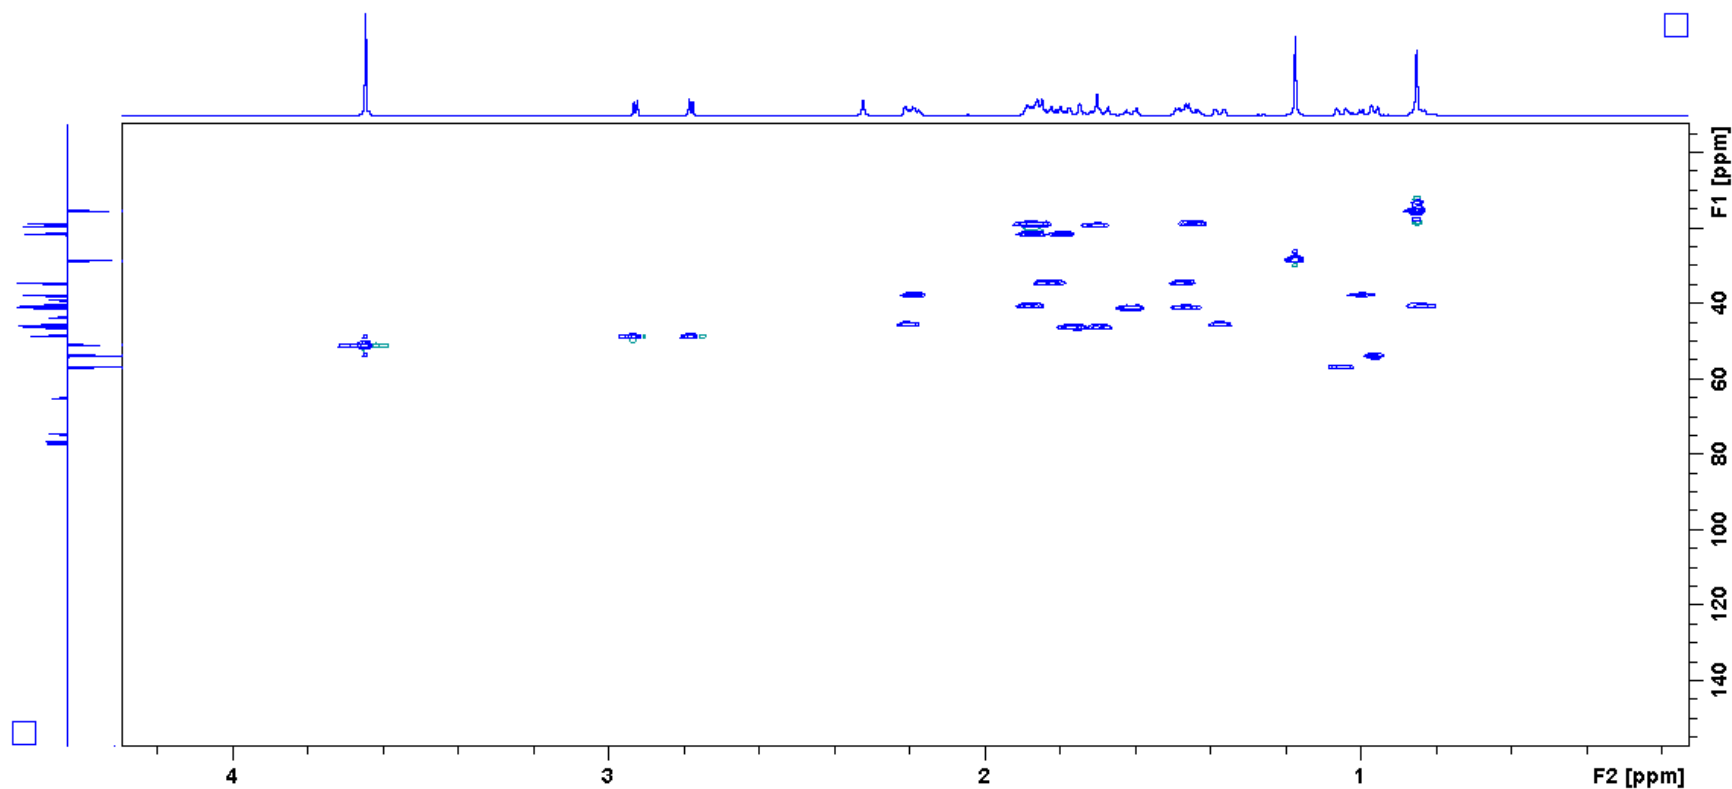

HMBC of compound (2'*S*,4*R*,4*aS*,6*aS*,11*aR*,11*bS*)-methyl 9-hydroxy-4,11b-dimethyldodecahydro-1*H*-spiro[6*a*,9-methanocyclohepta[*a*]naphthalene-8,2'-oxirane]-4-carboxylate (**3**)

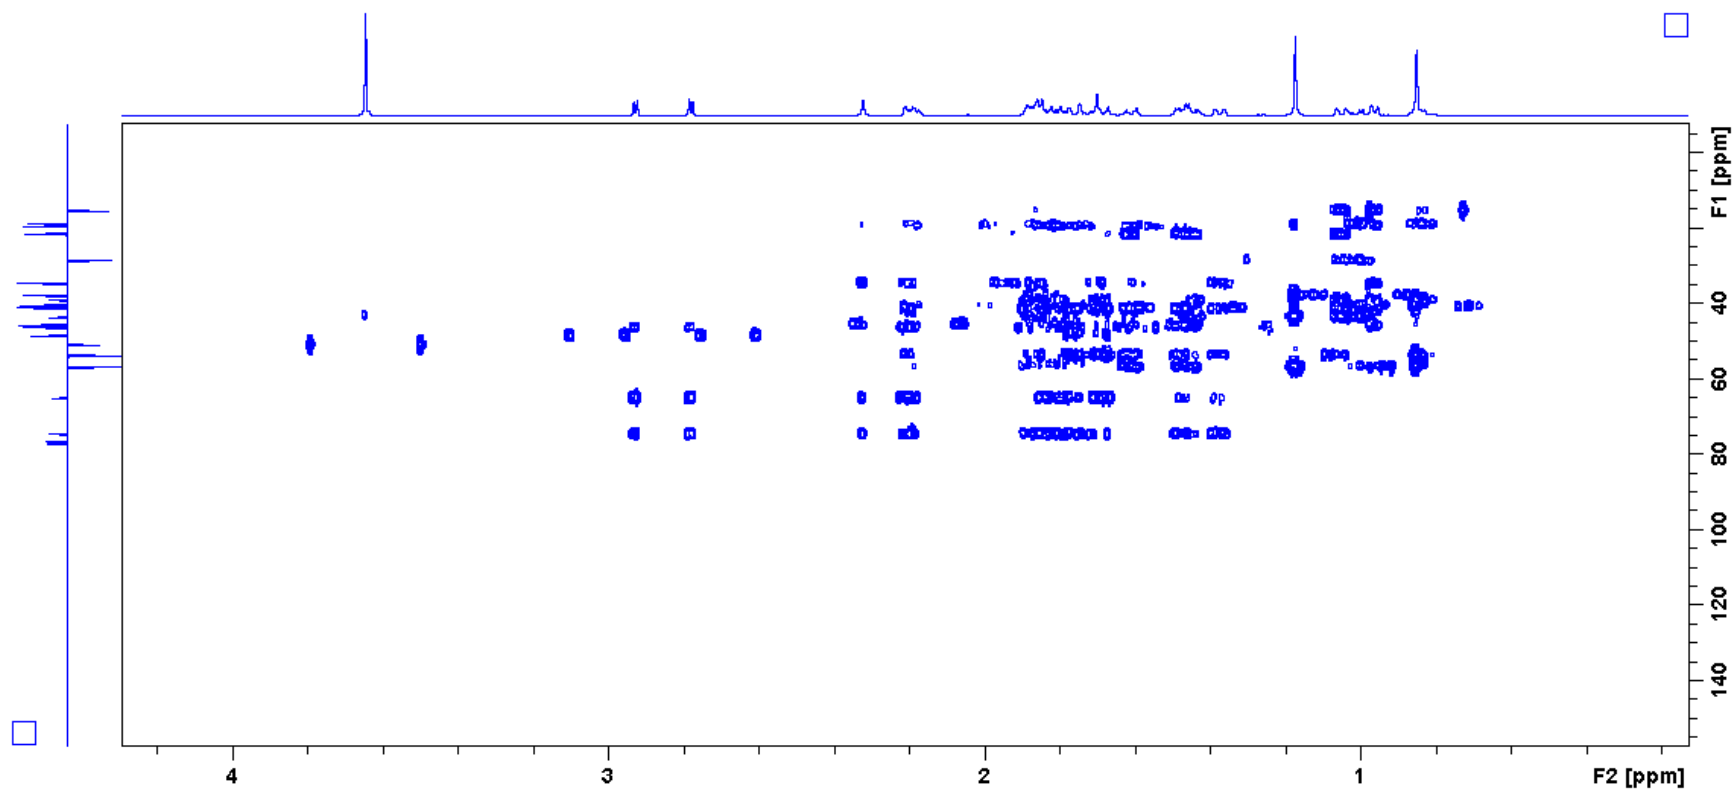

$^1\text{H}$ -NMR of compound (4*R*,4*aS*,6*aR*,9*S*,11*aR*,11*bS*)-methyl 9-(hydroxymethyl)-4,11*b*-dimethyl-8-oxotetradecahydro-6*a*,9-methanocyclohepta[*a*]naphthalene-4-carboxylate (**4**)

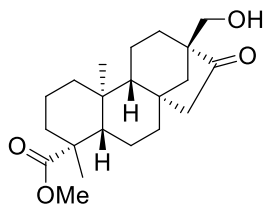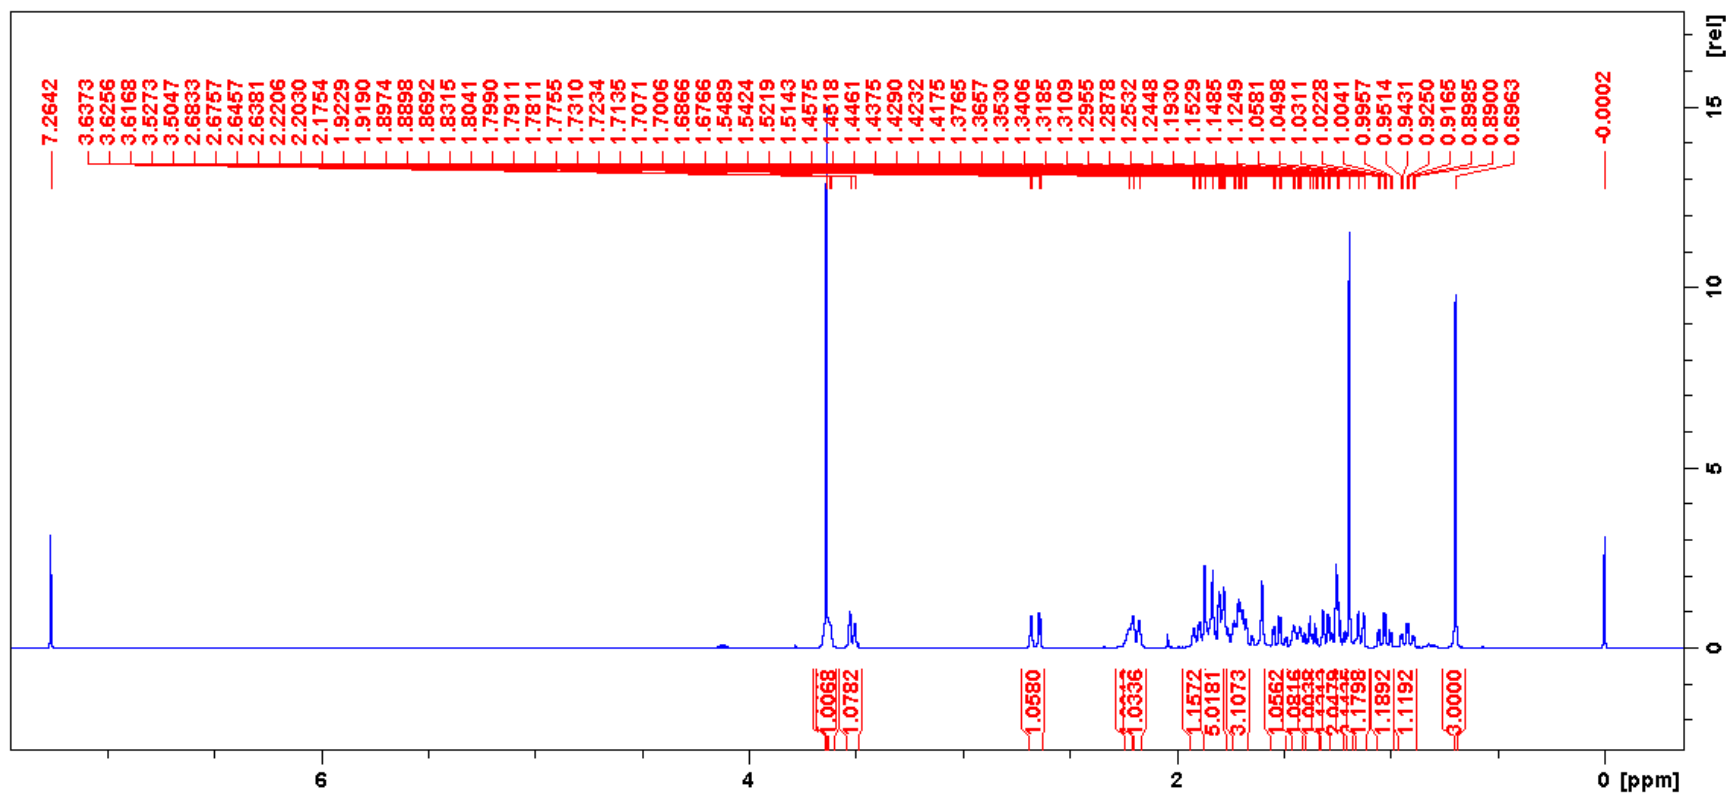



$^{13}\text{C}$ -NMR of compound (4*R*,4*aS*,6*aR*,9*S*,11*aR*,11*bS*)-methyl 9-(hydroxymethyl)-4,11*b*-dimethyl-8-oxotetradecahydro-6*a*,9-methanocyclohepta[*a*]naphthalene-4-carboxylate (**4**)

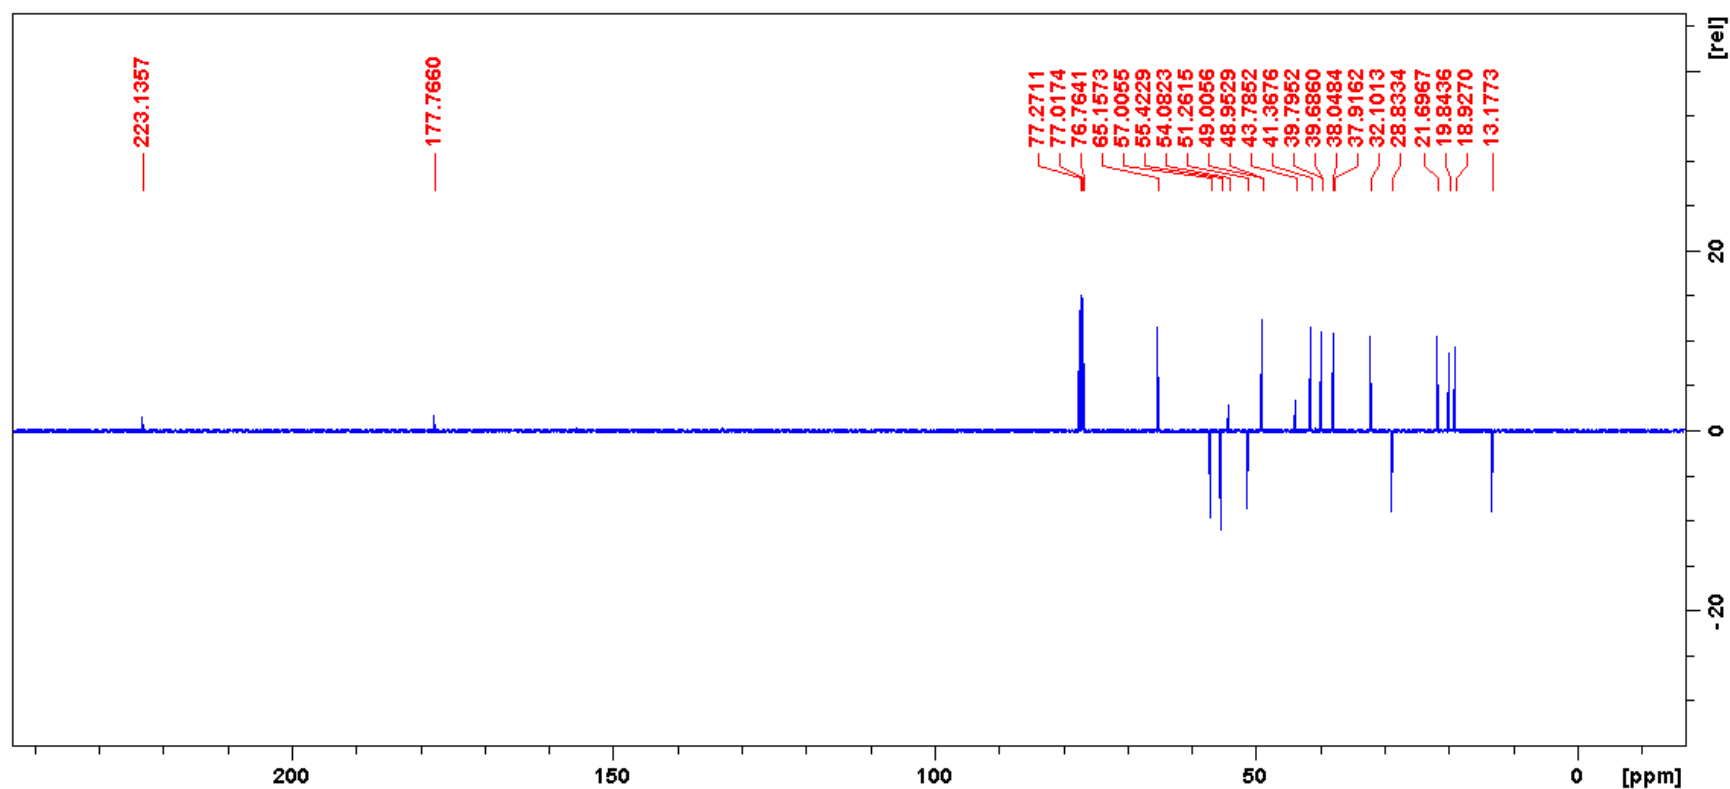

COSY of compound (4*R*,4*aS*,6*aR*,9*S*,11*aR*,11*bS*)-methyl 9-(hydroxymethyl)-4,11*b*-dimethyl-8-oxotetradecahydro-6*a*,9-methanocyclohepta[*a*]naphthalene-4-carboxylate (**4**)

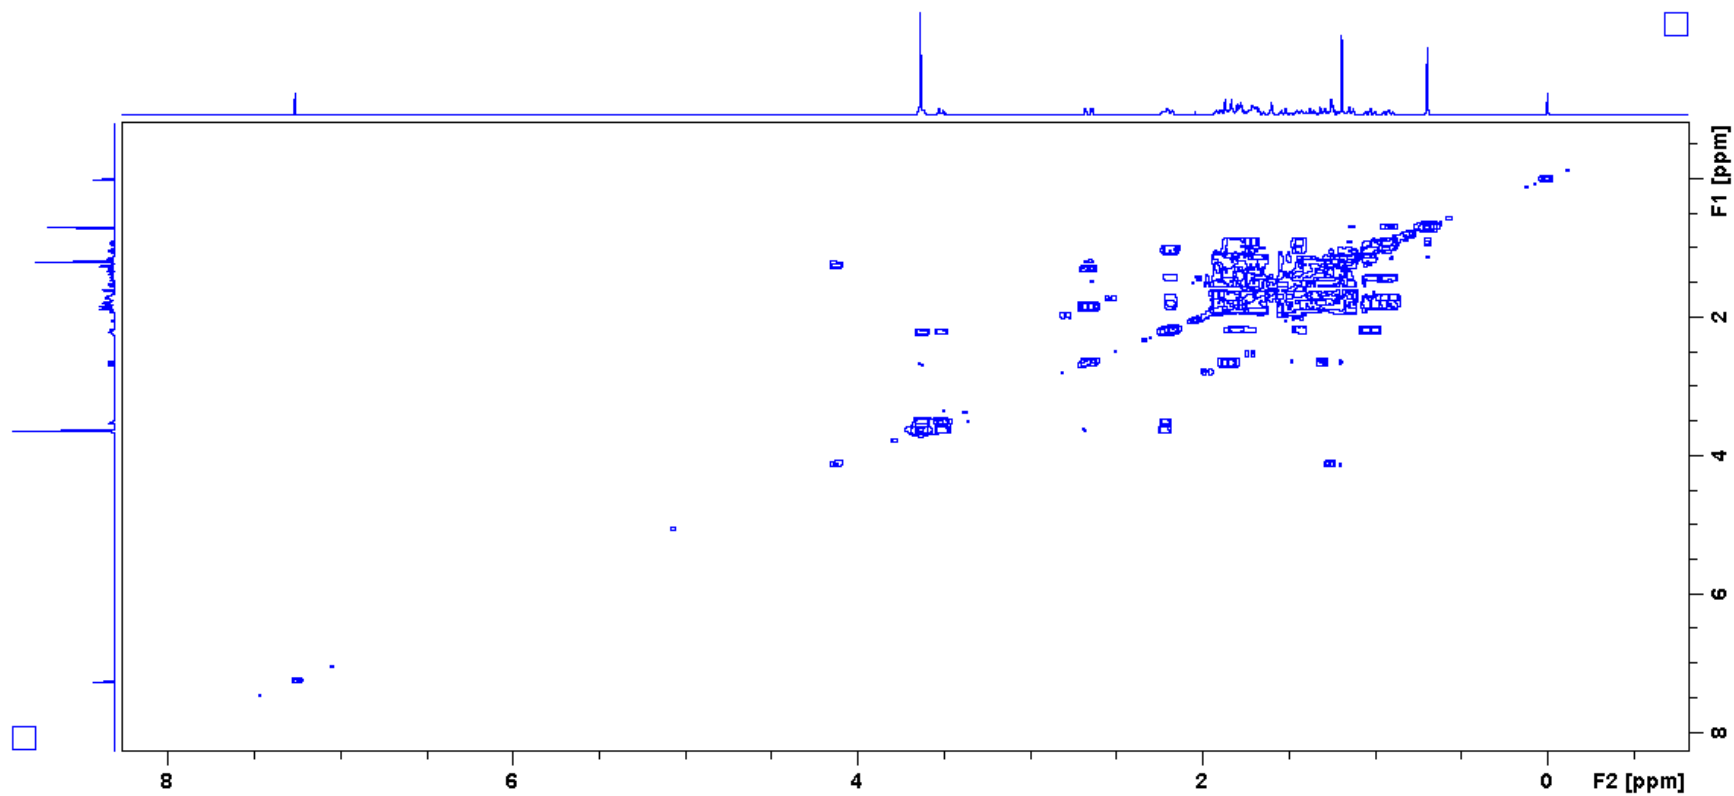

NOESY of compound (4*R*,4*aS*,6*aR*,9*S*,11*aR*,11*bS*)-methyl 9-(hydroxymethyl)-4,11*b*-dimethyl-8-oxotetradecahydro-6*a*,9-methanocyclohepta[*a*]naphthalene-4-carboxylate (**4**)

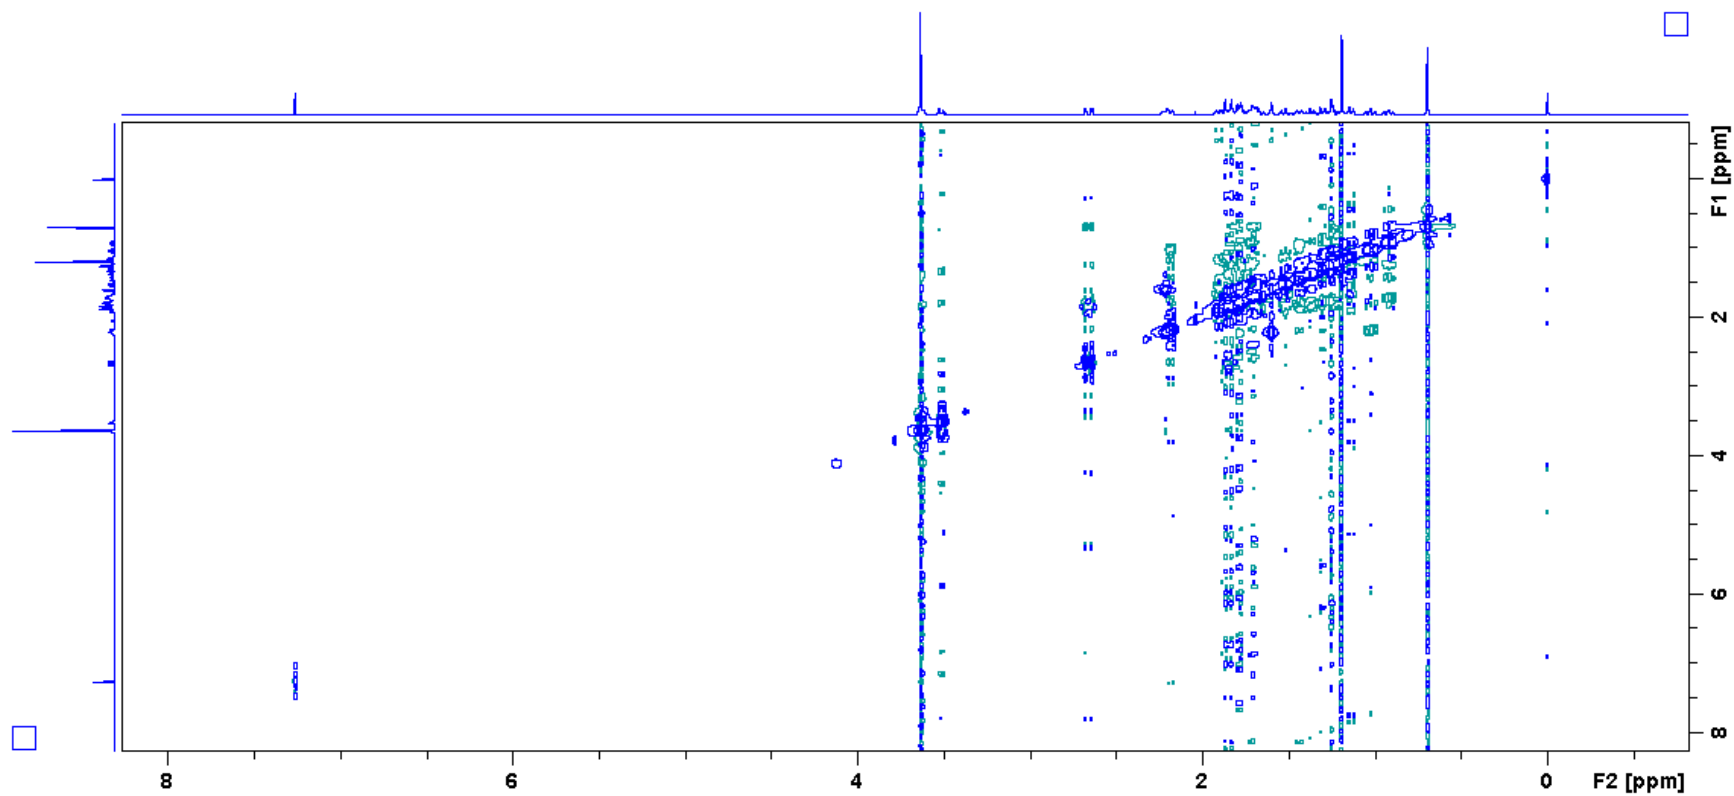

HSQC of compound (4*R*,4*aS*,6*aR*,9*S*,11*aR*,11*bS*)-methyl 9-(hydroxymethyl)-4,11*b*-dimethyl-8-oxotetradecahydro-6*a*,9-methanocyclohepta[*a*]naphthalene-4-carboxylate (**4**)

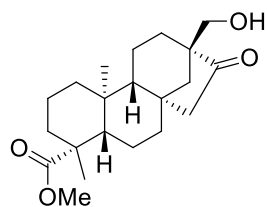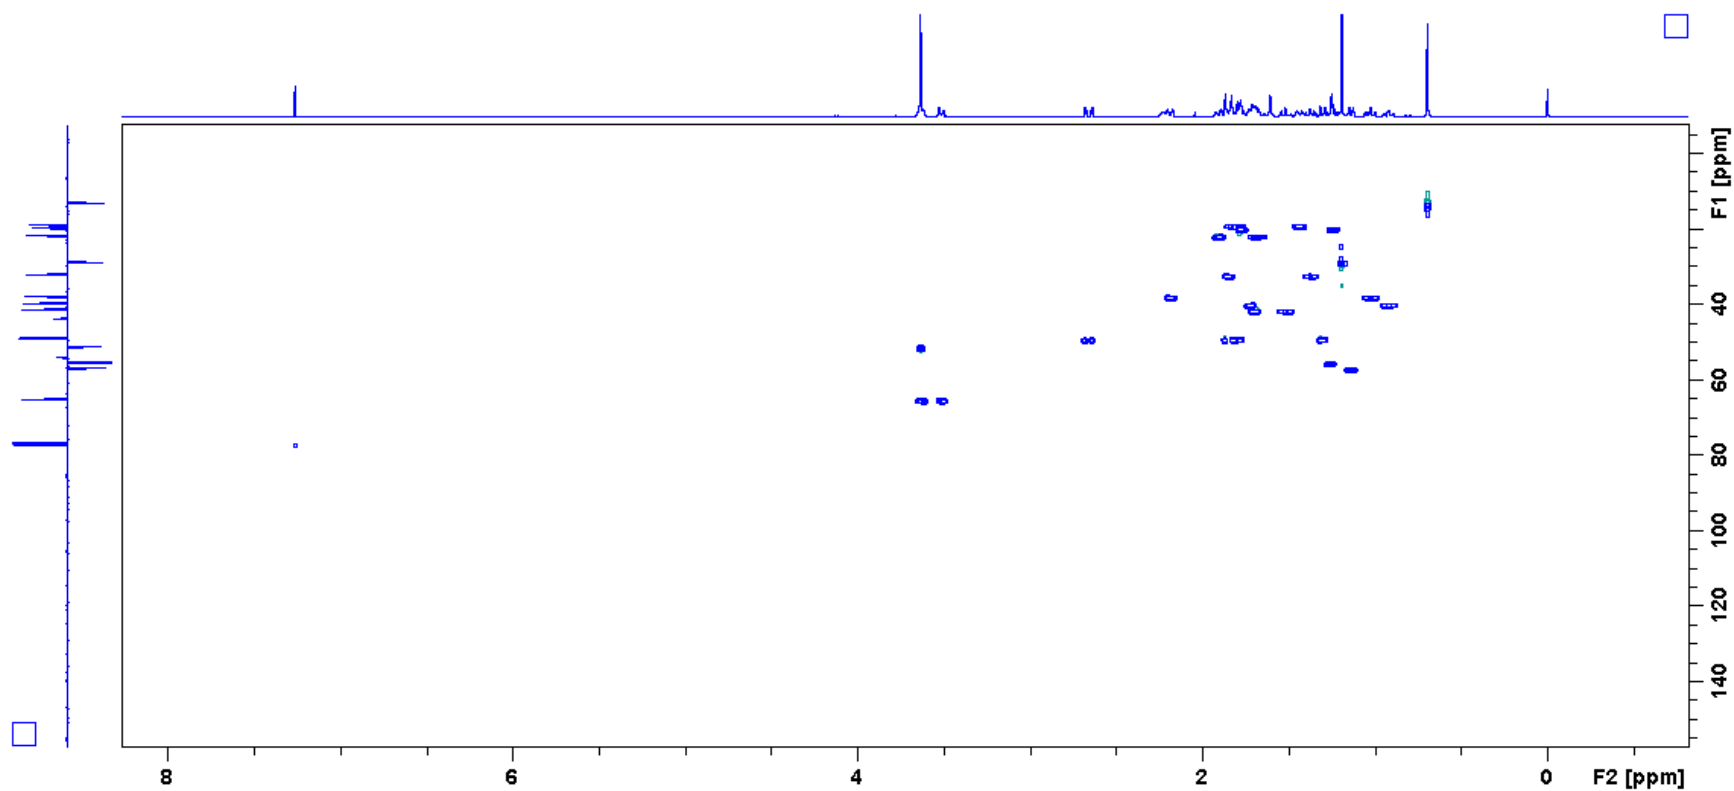

HMBC of compound (4*R*,4*aS*,6*aR*,9*S*,11*aR*,11*bS*)-methyl 9-(hydroxymethyl)-4,11*b*-dimethyl-8-oxotetradecahydro-6*a*,9-methanocyclohepta[*a*]naphthalene-4-carboxylate (**4**)

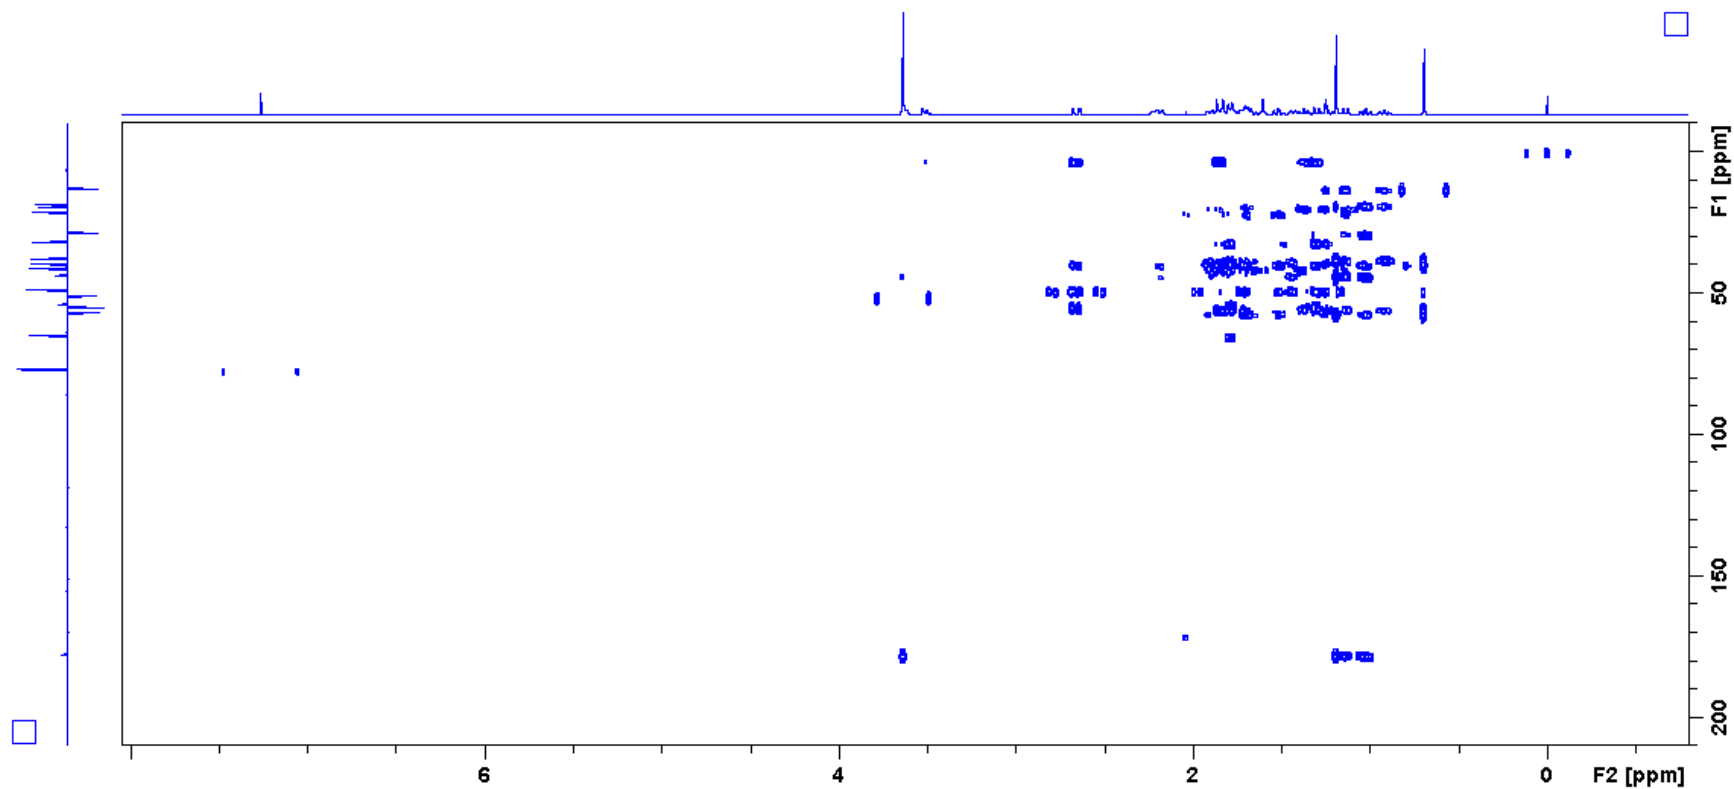

$^1\text{H}$ -NMR of compound (4*R*,4*aS*,6*aR*,9*R*,11*aR*,11*bS*,*E*)-methyl 8-(hydroxyimino)-9-(hydroxymethyl)-4,11b-dimethyltetradecahydro-6*a*,9-methanocyclohepta[*a*]naphthalene-4-carboxylate (**5**)

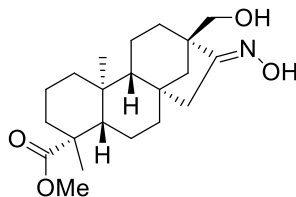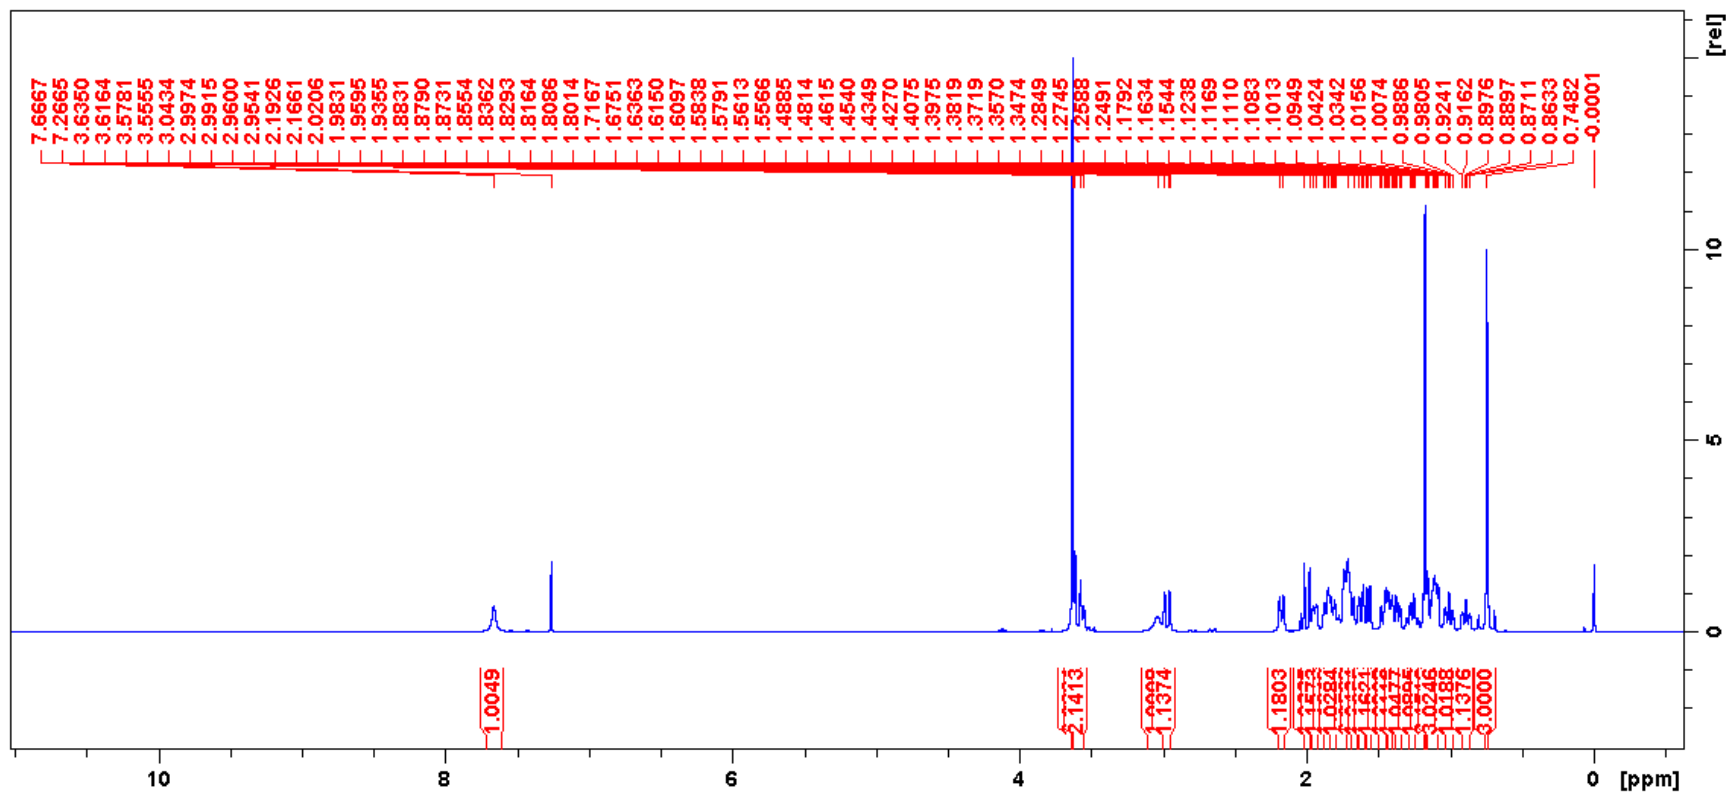

$^{13}\text{C}$ -NMR of compound (4*R*,4*aS*,6*aR*,9*R*,11*aR*,11*bS*,*E*)-methyl 8-(hydroxyimino)-9-(hydroxymethyl)-4,11b-dimethyltetradecahydro-6*a*,9-methanocyclohepta[*a*]naphthalene-4-carboxylate (**5**)

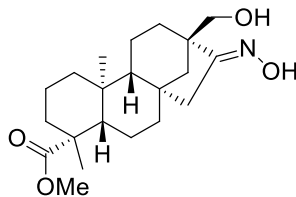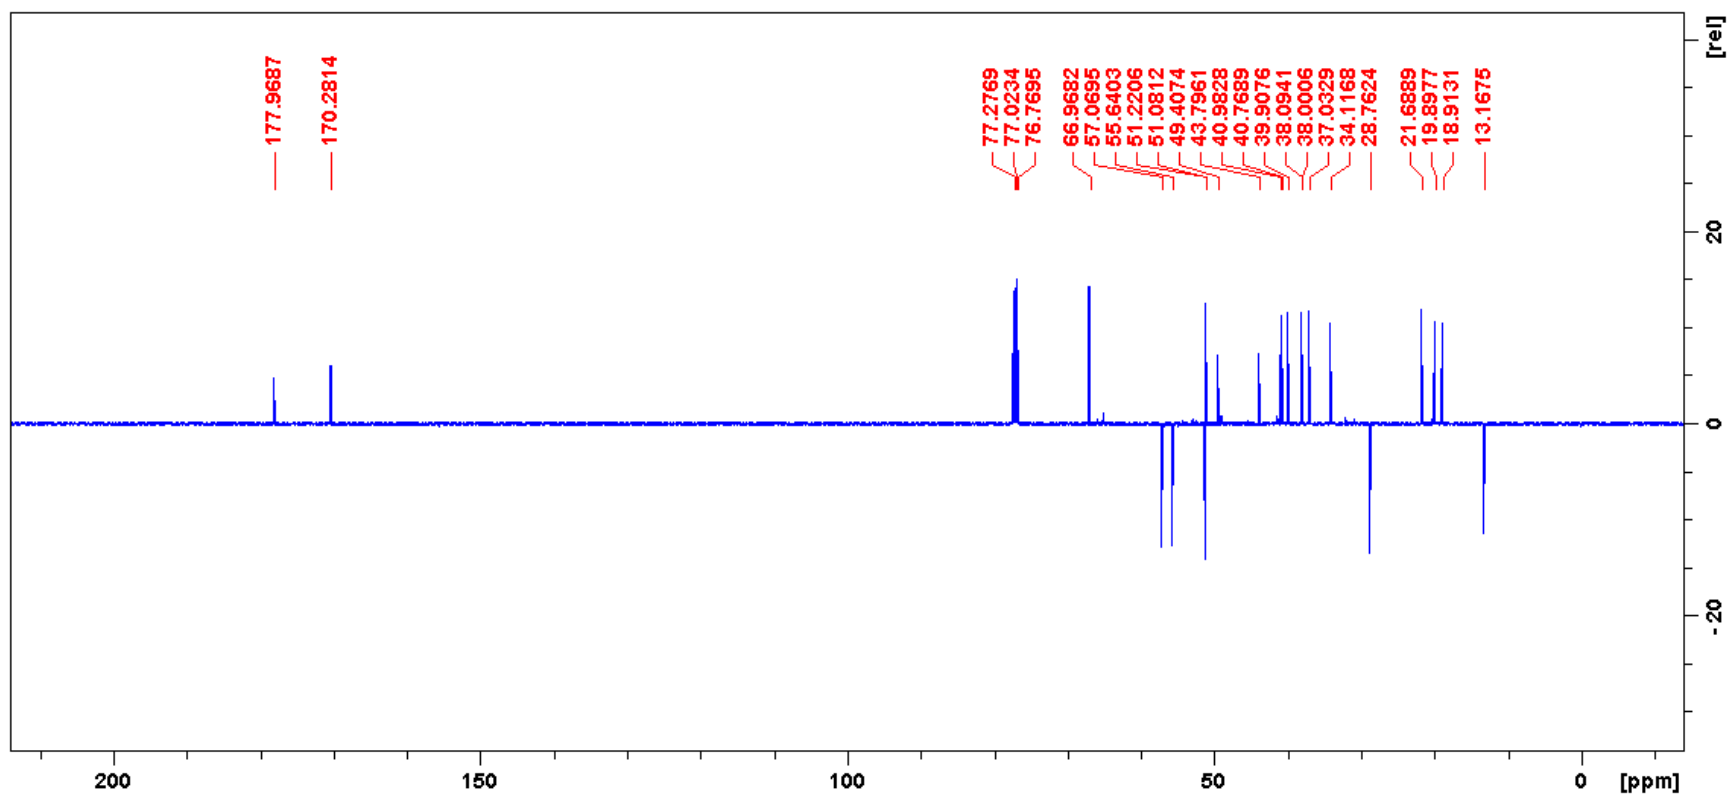

COSY of compound (4*R*,4*aS*,6*aR*,9*R*,11*aR*,11*bS*,*E*)-methyl 8-(hydroxyimino)-9-(hydroxymethyl)-4,11b-dimethyltetradecahydro-6*a*,9-methanocyclohepta[*a*]naphthalene-4-carboxylate (**5**)

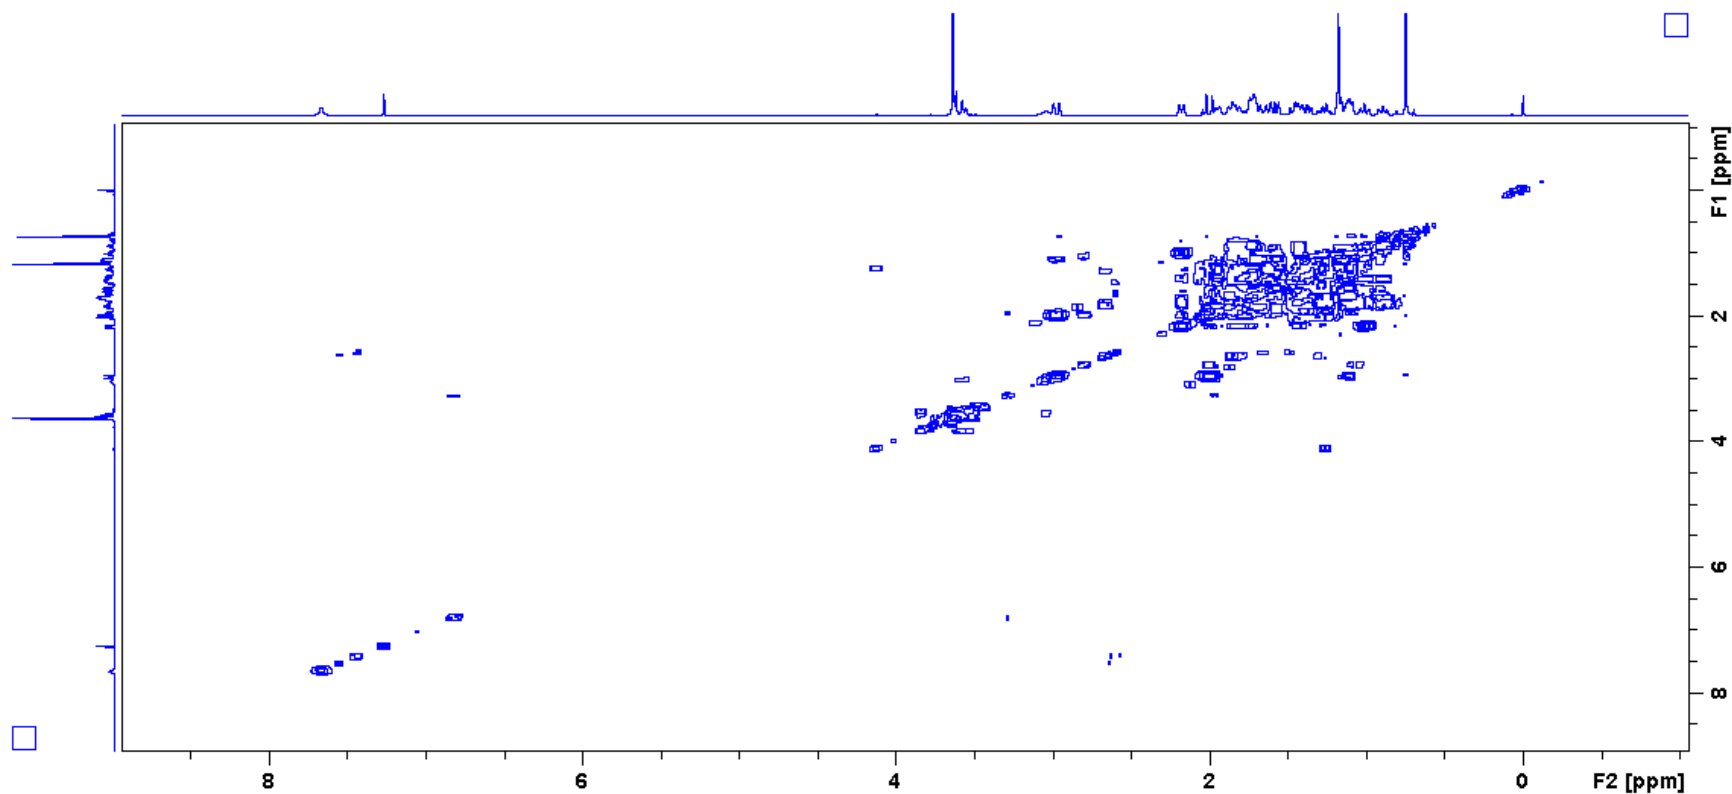



NOESY of compound (4*R*,4*aS*,6*aR*,9*R*,11*aR*,11*bS*,*E*)-methyl 8-(hydroxyimino)-9-(hydroxymethyl)-4,11b-dimethyltetradecahydro-6*a*,9-methanocyclohepta[*a*]naphthalene-4-carboxylate (**5**)

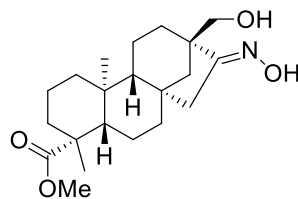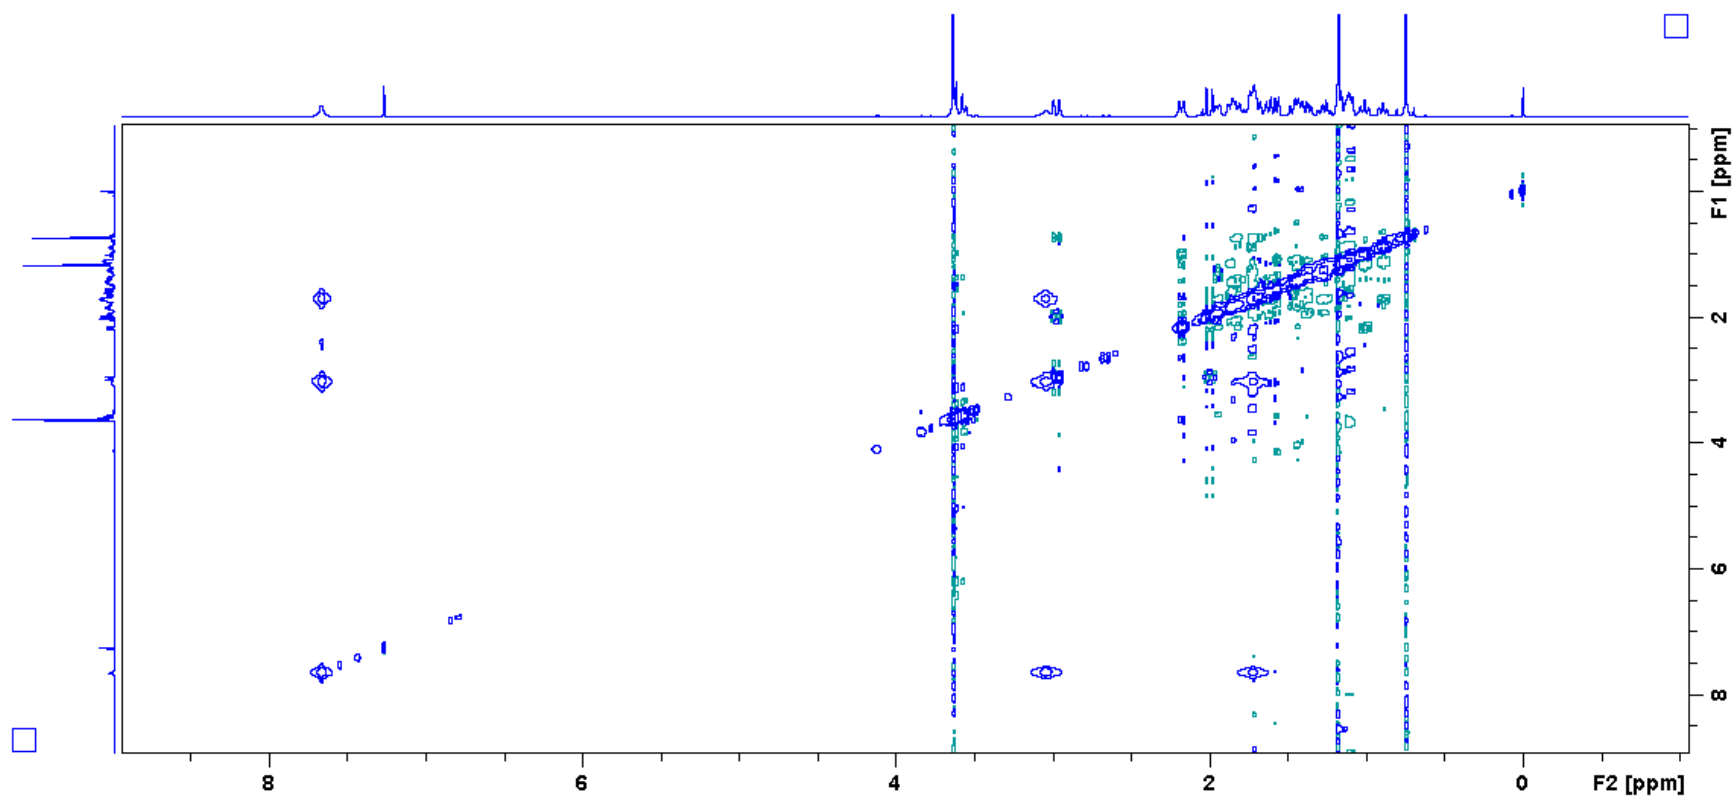

HSQC of compound (4*R*,4*aS*,6*aR*,9*R*,11*aR*,11*bS*,*E*)-methyl 8-(hydroxyimino)-9-(hydroxymethyl)-4,11b-dimethyltetradecahydro-6*a*,9-methanocyclohepta[*a*]naphthalene-4-carboxylate (**5**)

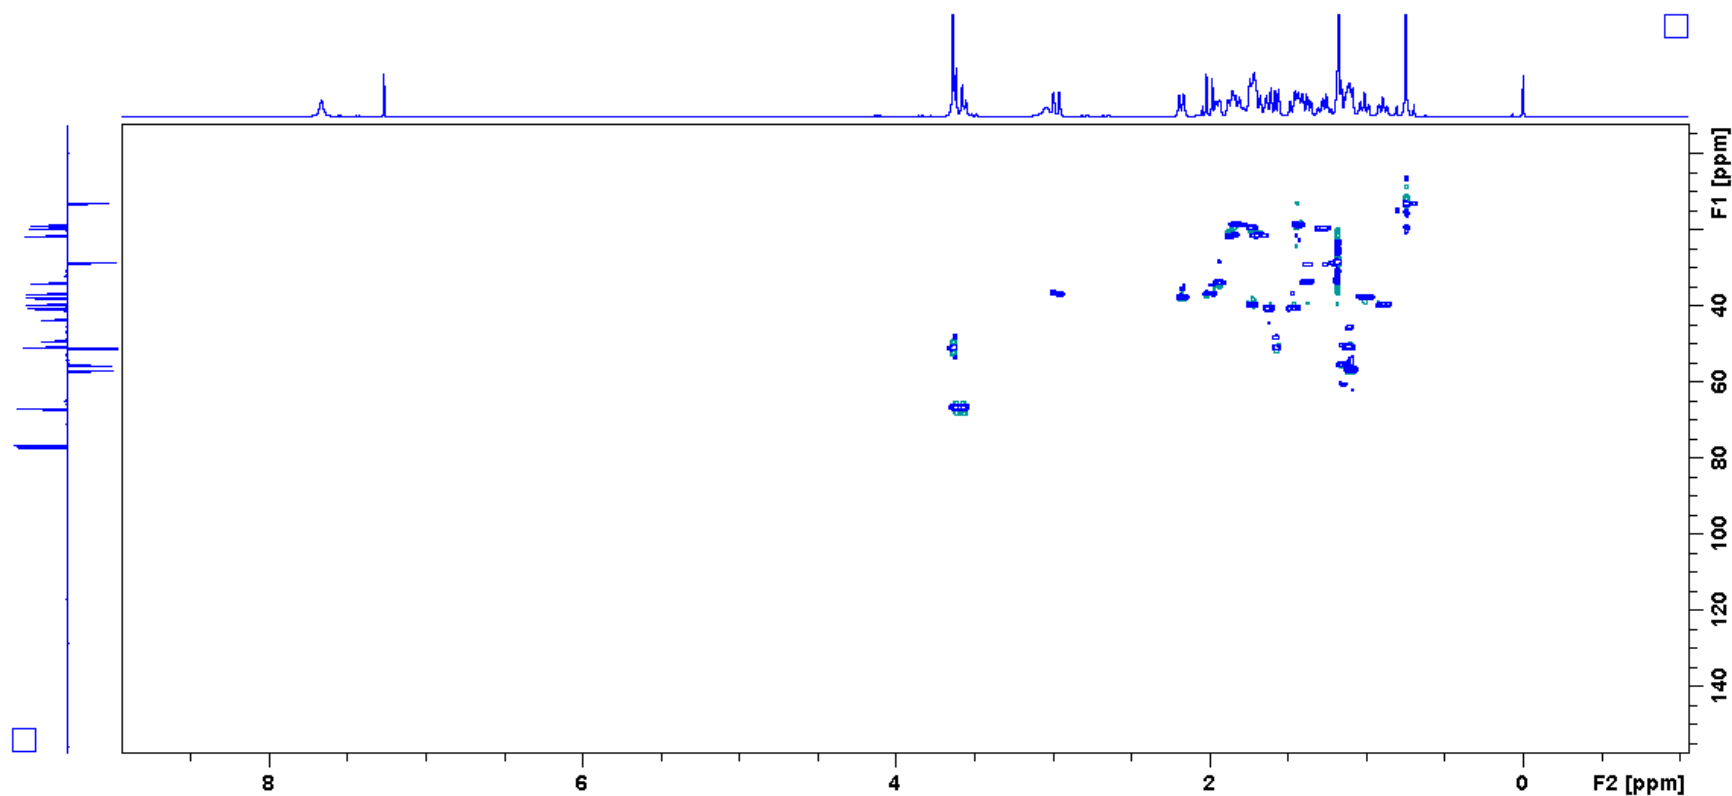

HMBC of compound (4*R*,4*aS*,6*aR*,9*R*,11*aR*,11*bS*,*E*)-methyl 8-(hydroxyimino)-9-(hydroxymethyl)-4,11b-dimethyltetradecahydro-6*a*,9-methanocyclohepta[*a*]naphthalene-4-carboxylate (**5**)

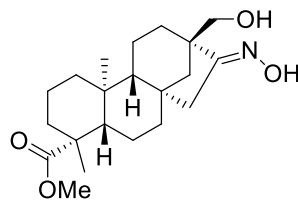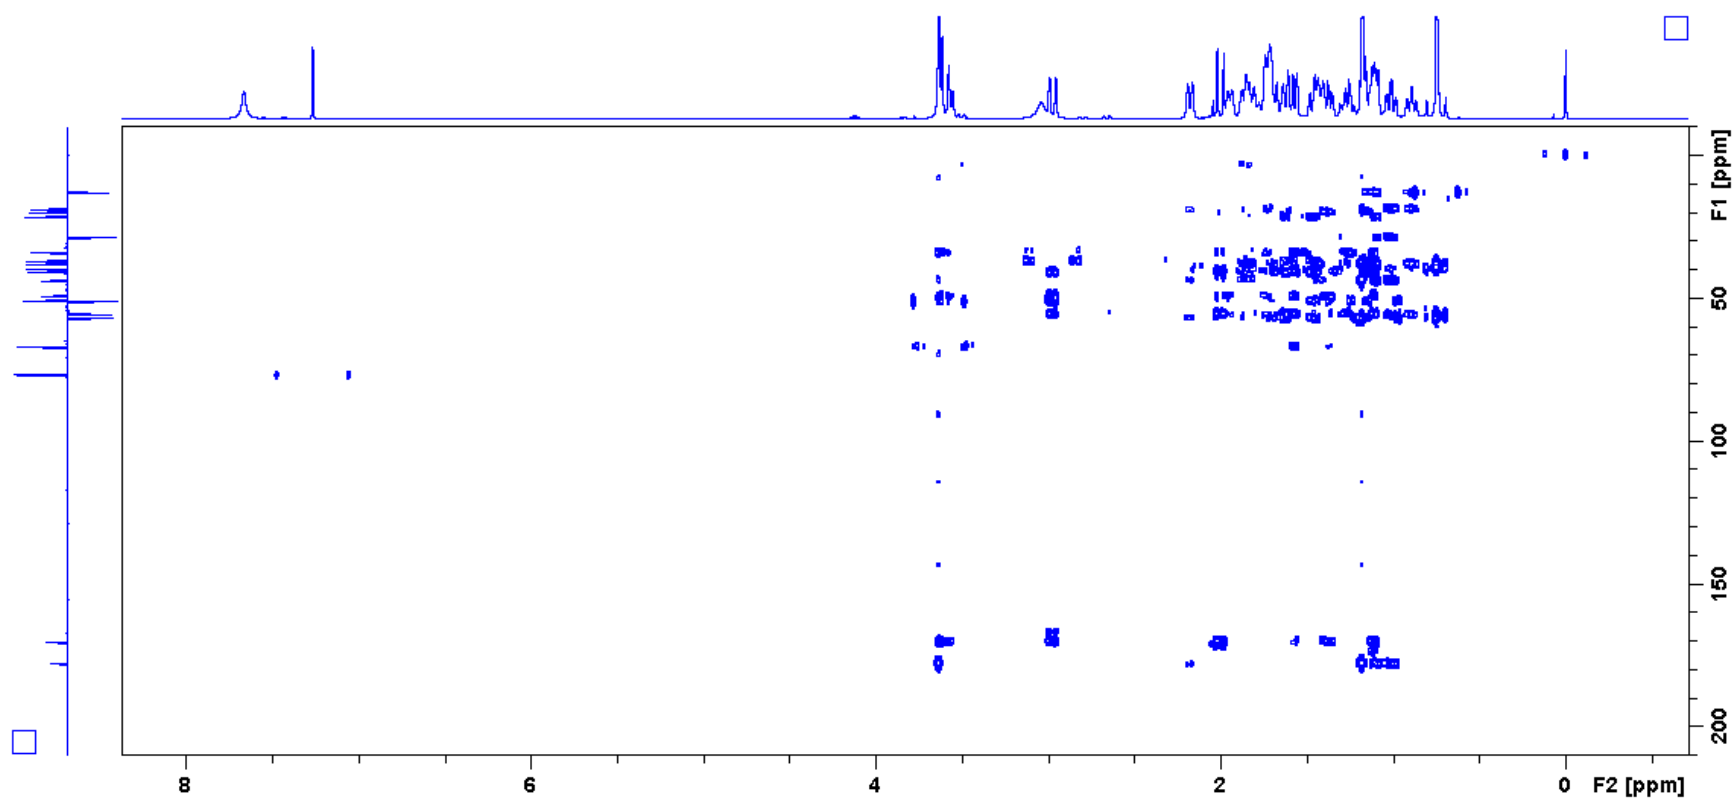

$^1\text{H}$ -NMR of compound (4*R*,4*aS*,6*aR*,8*R*,9*R*,11*aR*,11*bS*)-methyl 8-amino-9-(hydroxymethyl)-4,11*b*-dimethyltetradecahydro-6*a*,9-methanocyclohepta[*a*]naphthalene-4-carboxylate (**6**)

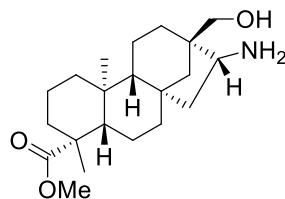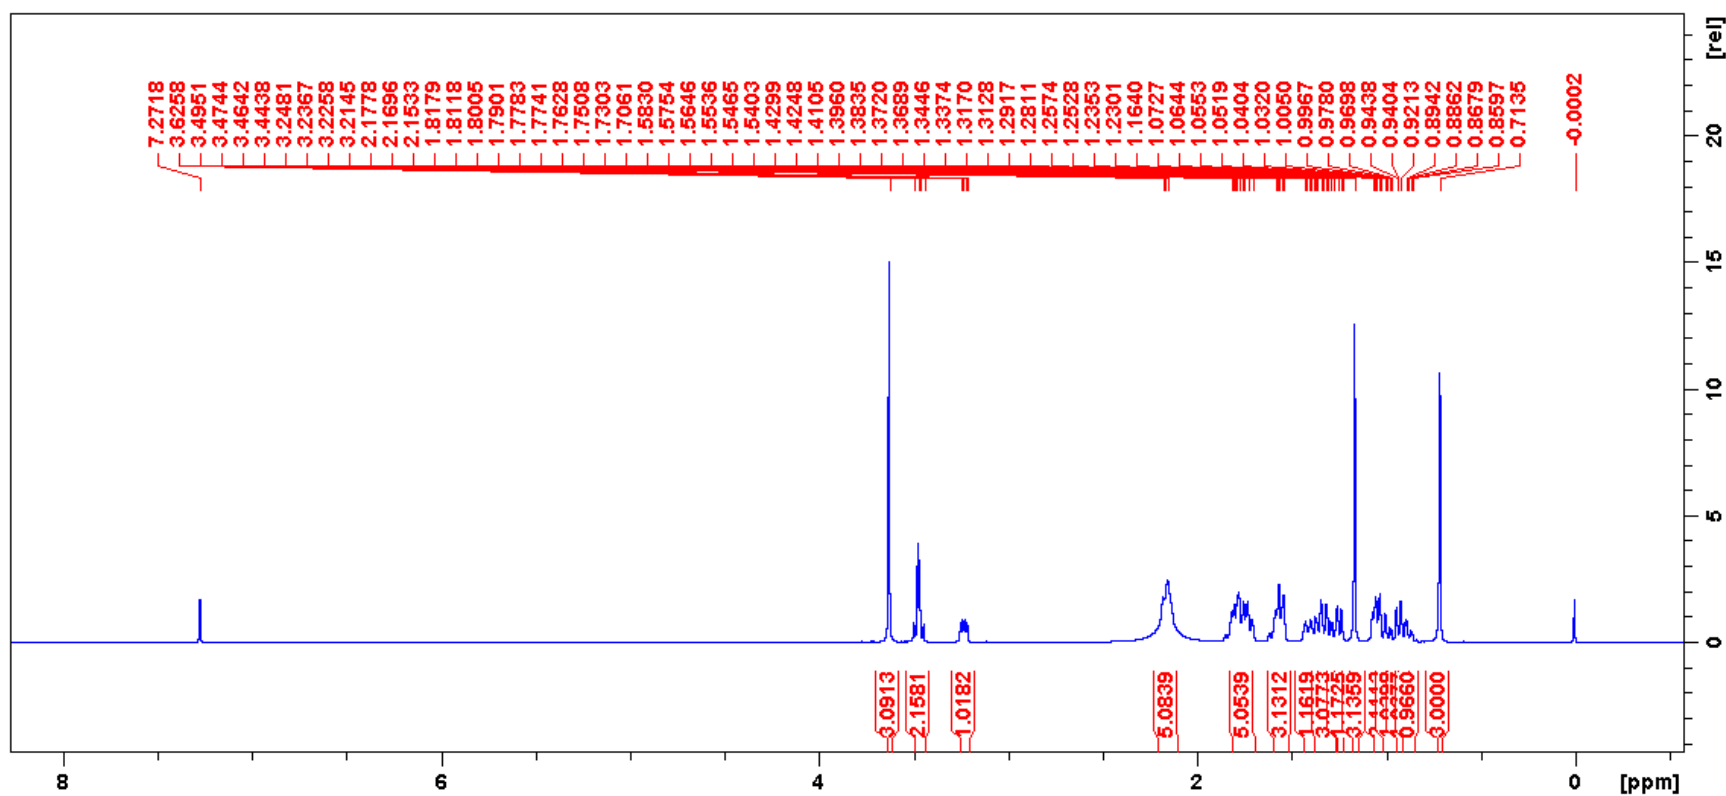

$^{13}\text{C}$ -NMR of compound (4*R*,4*aS*,6*aR*,8*R*,9*R*,11*aR*,11*bS*)-methyl 8-amino-9-(hydroxymethyl)-4,11*b*-dimethyltetradecahydro-6*a*,9-methanocyclohepta[*a*]naphthalene-4-carboxylate (**6**)

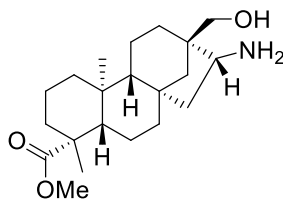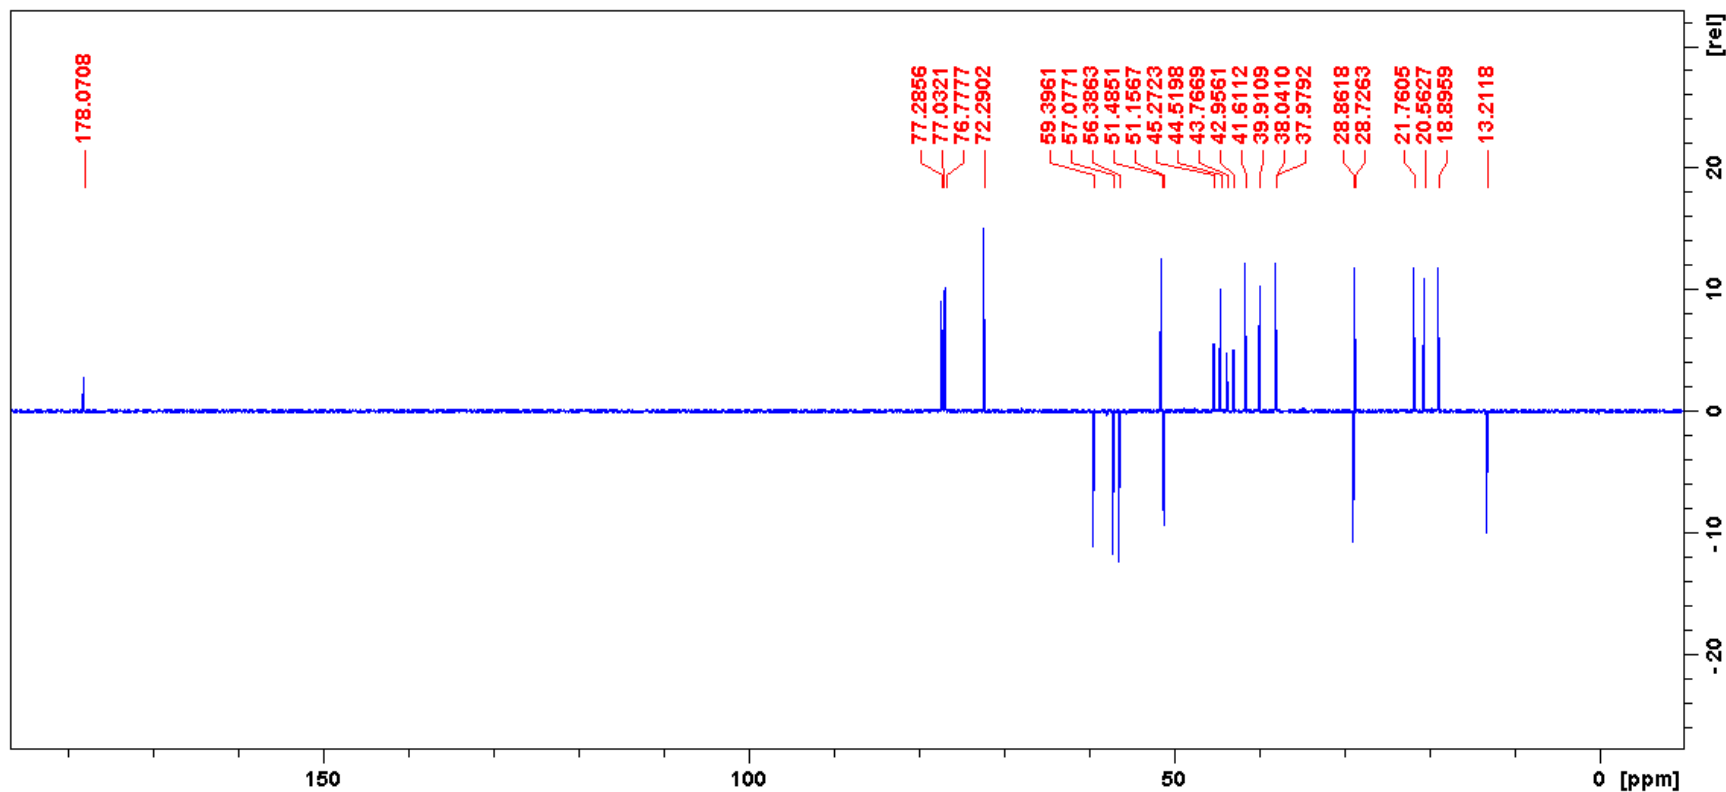

COSY of compound (4*R*,4*aS*,6*aR*,8*R*,9*R*,11*aR*,11*bS*)-methyl 8-amino-9-(hydroxymethyl)-4,11*b*-dimethyltetradecahydro-6*a*,9-methanocyclohepta[*a*]naphthalene-4-carboxylate (**6**)

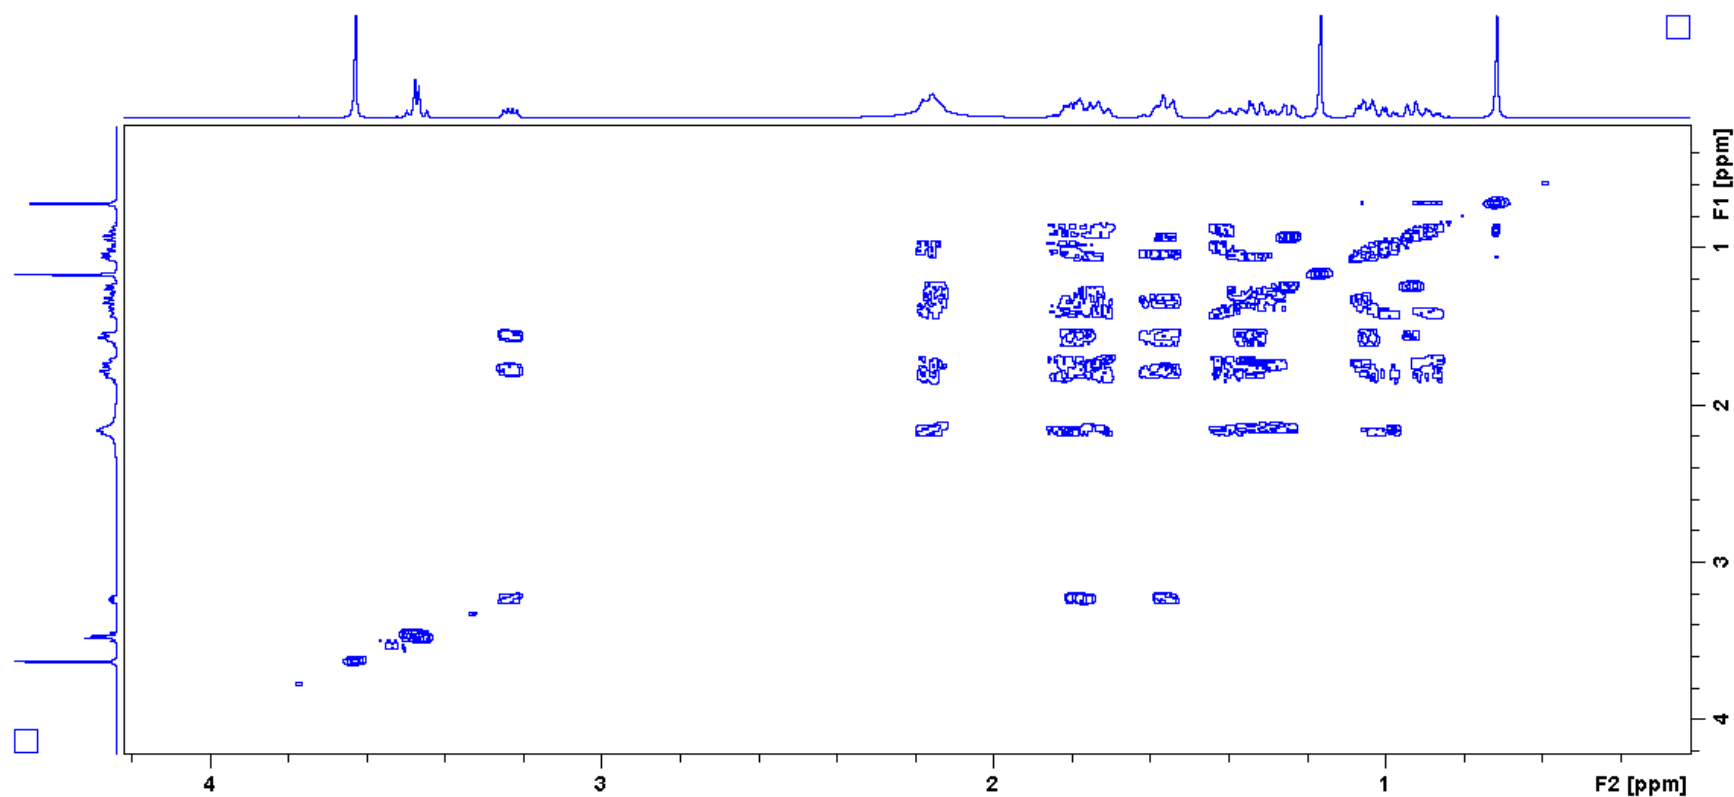

NOESY of compound (4*R*,4*aS*,6*aR*,8*R*,9*R*,11*aR*,11*bS*)-methyl 8-amino-9-(hydroxymethyl)-4,11*b*-dimethyltetradecahydro-6*a*,9-methanocyclohepta[*a*]naphthalene-4-carboxylate (**6**)

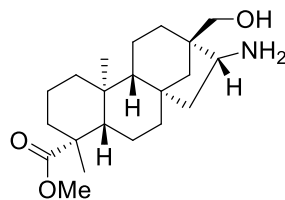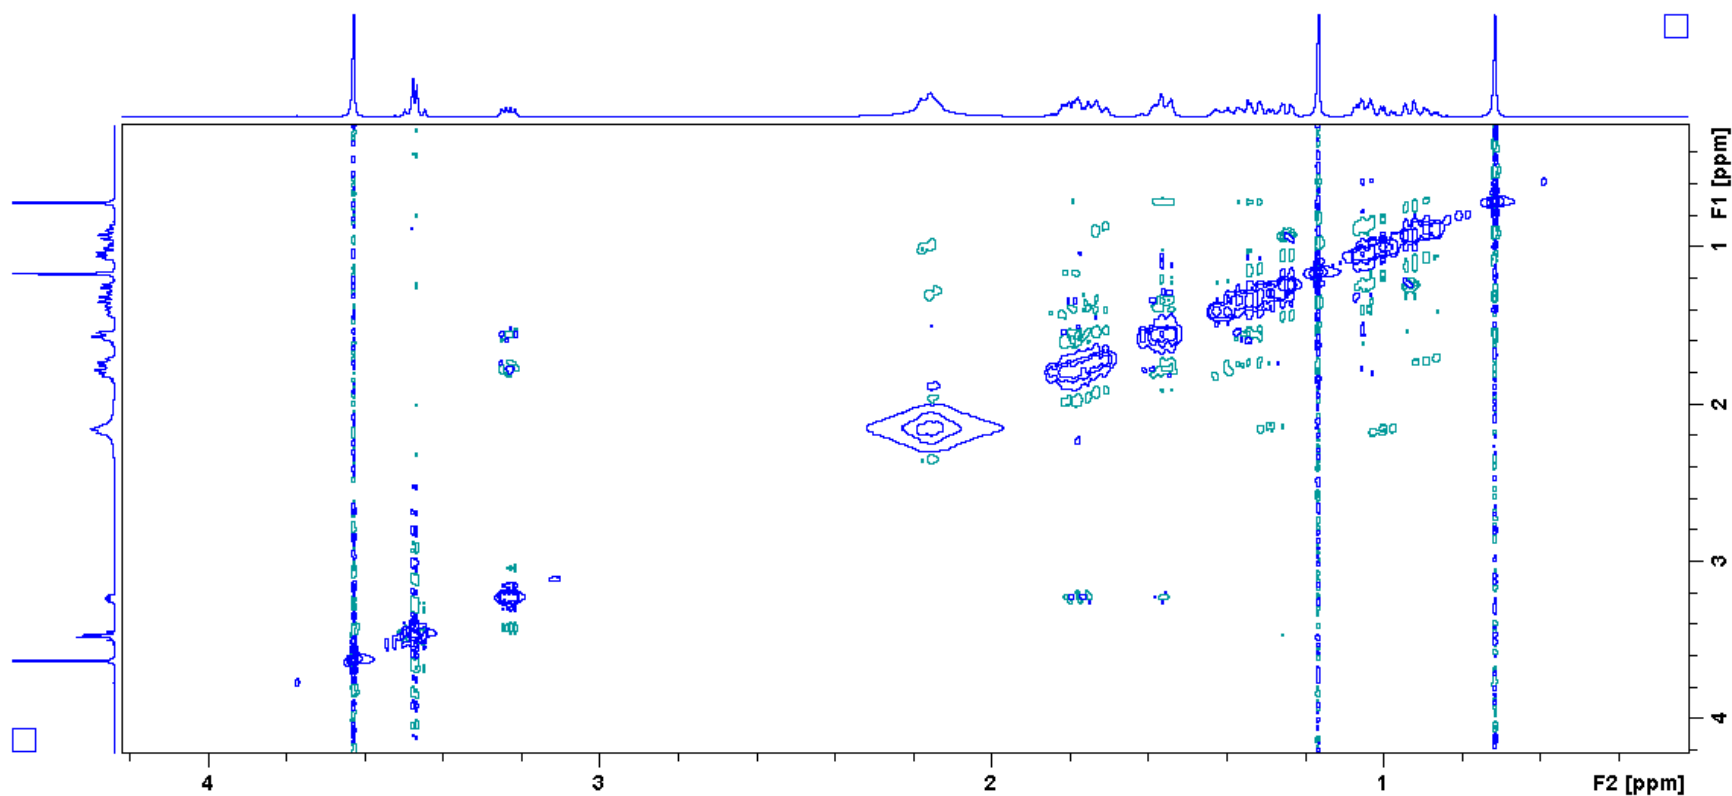

HSQC of compound (4*R*,4*aS*,6*aR*,8*R*,9*R*,11*aR*,11*bS*)-methyl 8-amino-9-(hydroxymethyl)-4,11*b*-dimethyltetradecahydro-6*a*,9-methanocyclohepta[*a*]naphthalene-4-carboxylate (**6**)

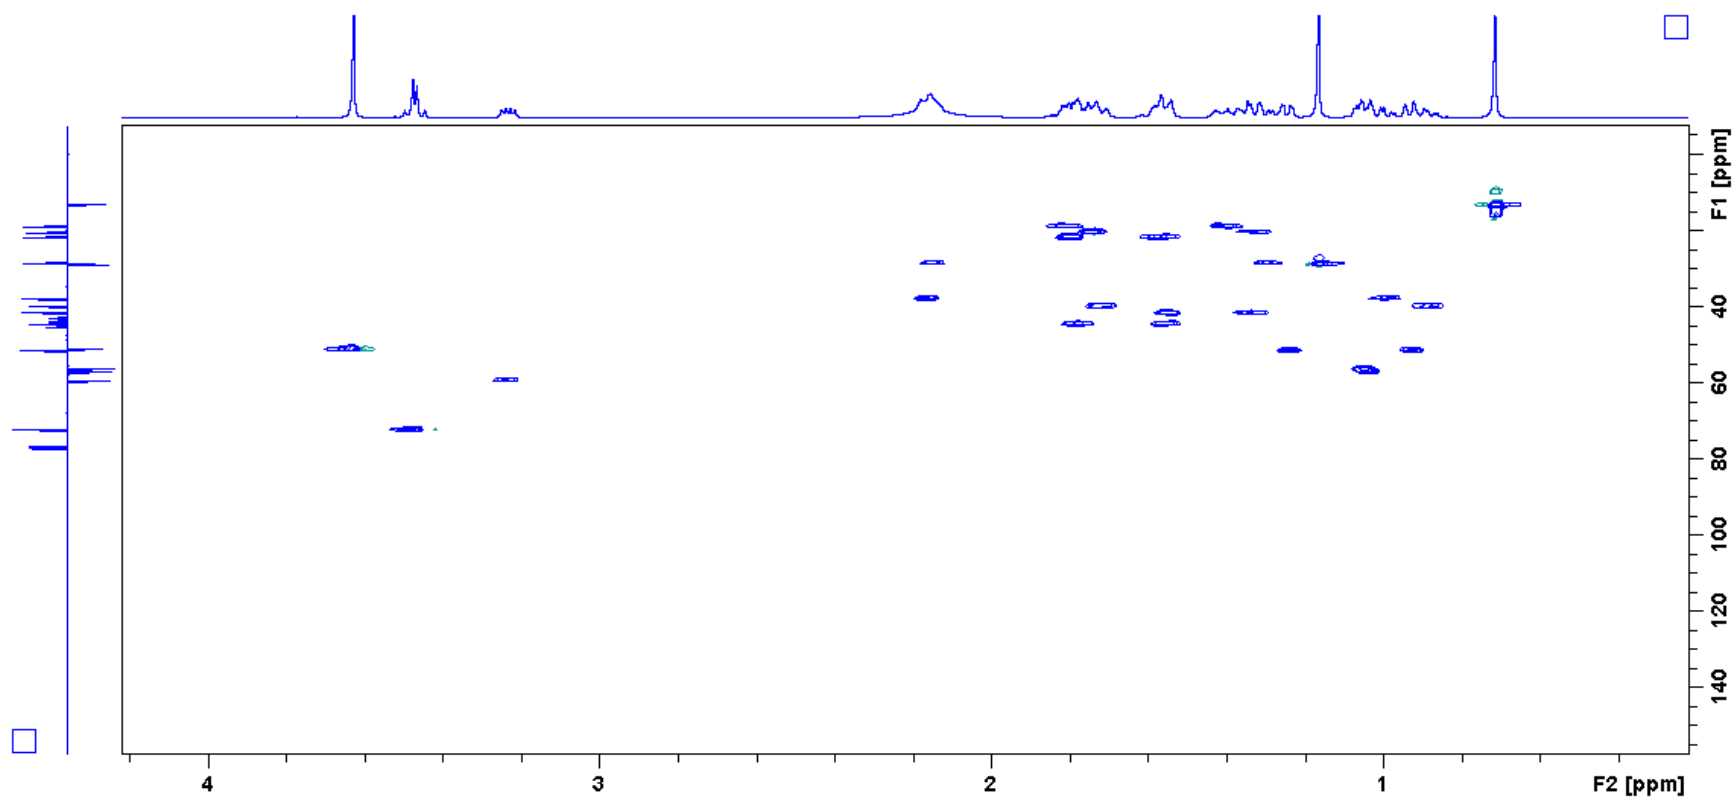



HMBC of compound (4*R*,4*aS*,6*aR*,8*R*,9*R*,11*aR*,11*bS*)-methyl 8-amino-9-(hydroxymethyl)-4,11*b*-dimethyltetradecahydro-6*a*,9-methanocyclohepta[*a*]naphthalene-4-carboxylate (**6**)

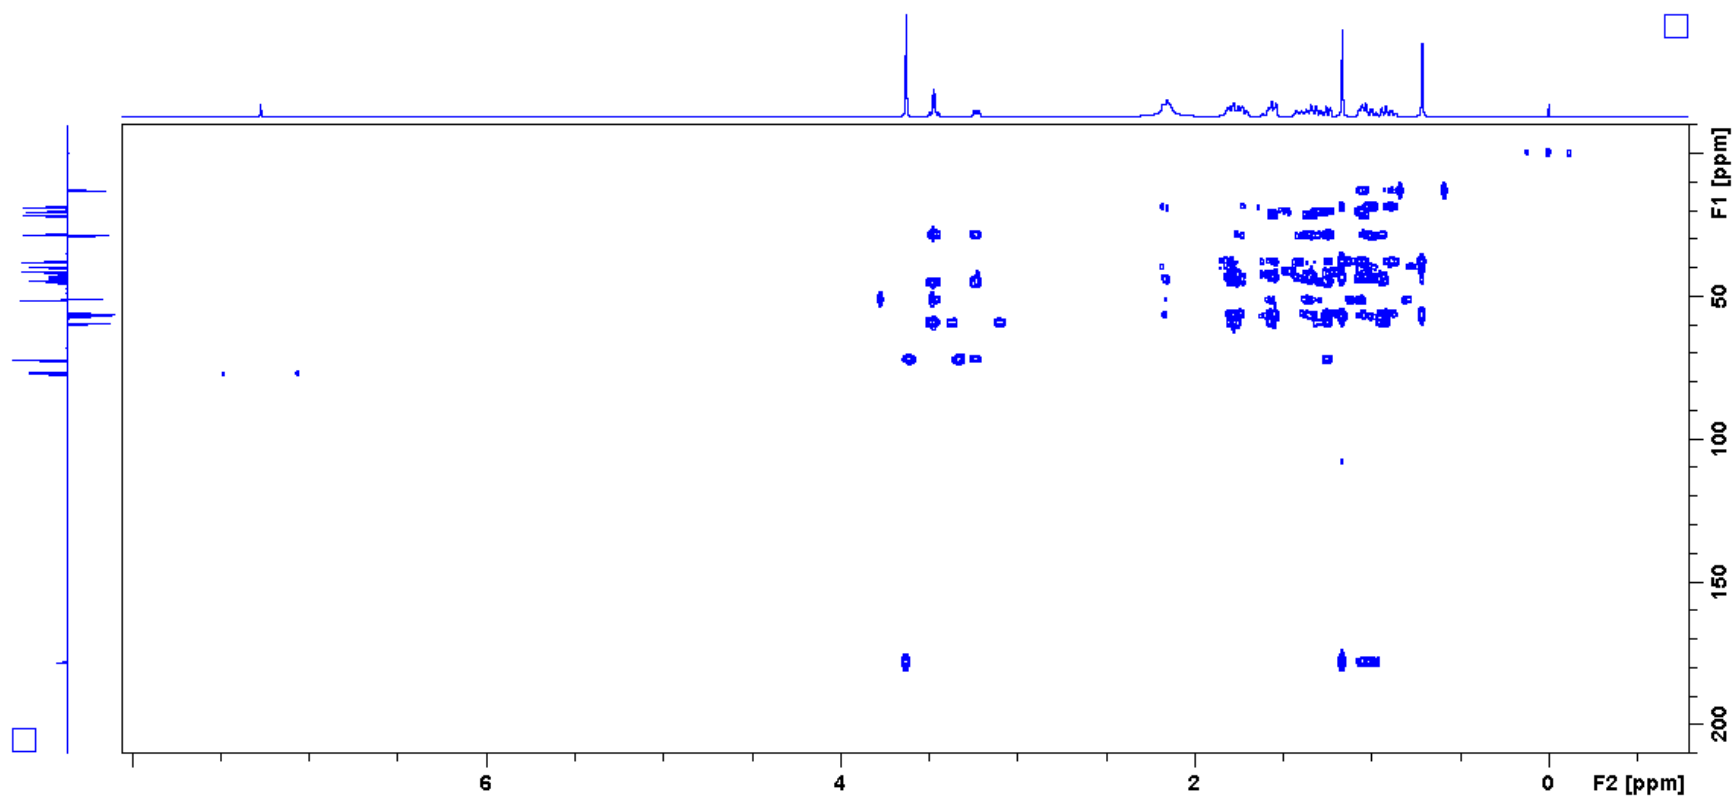

$^1\text{H}$ -NMR of compound (4*R*,4*aS*,6*aR*,8*S*,9*R*,11*aR*,11*bS*)-methyl 8-amino-9-(hydroxymethyl)-4,11*b*-dimethyltetradecahydro-6*a*,9-methanocyclohepta[*a*]naphthalene-4-carboxylate (**7**)

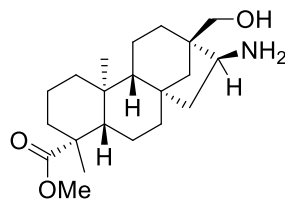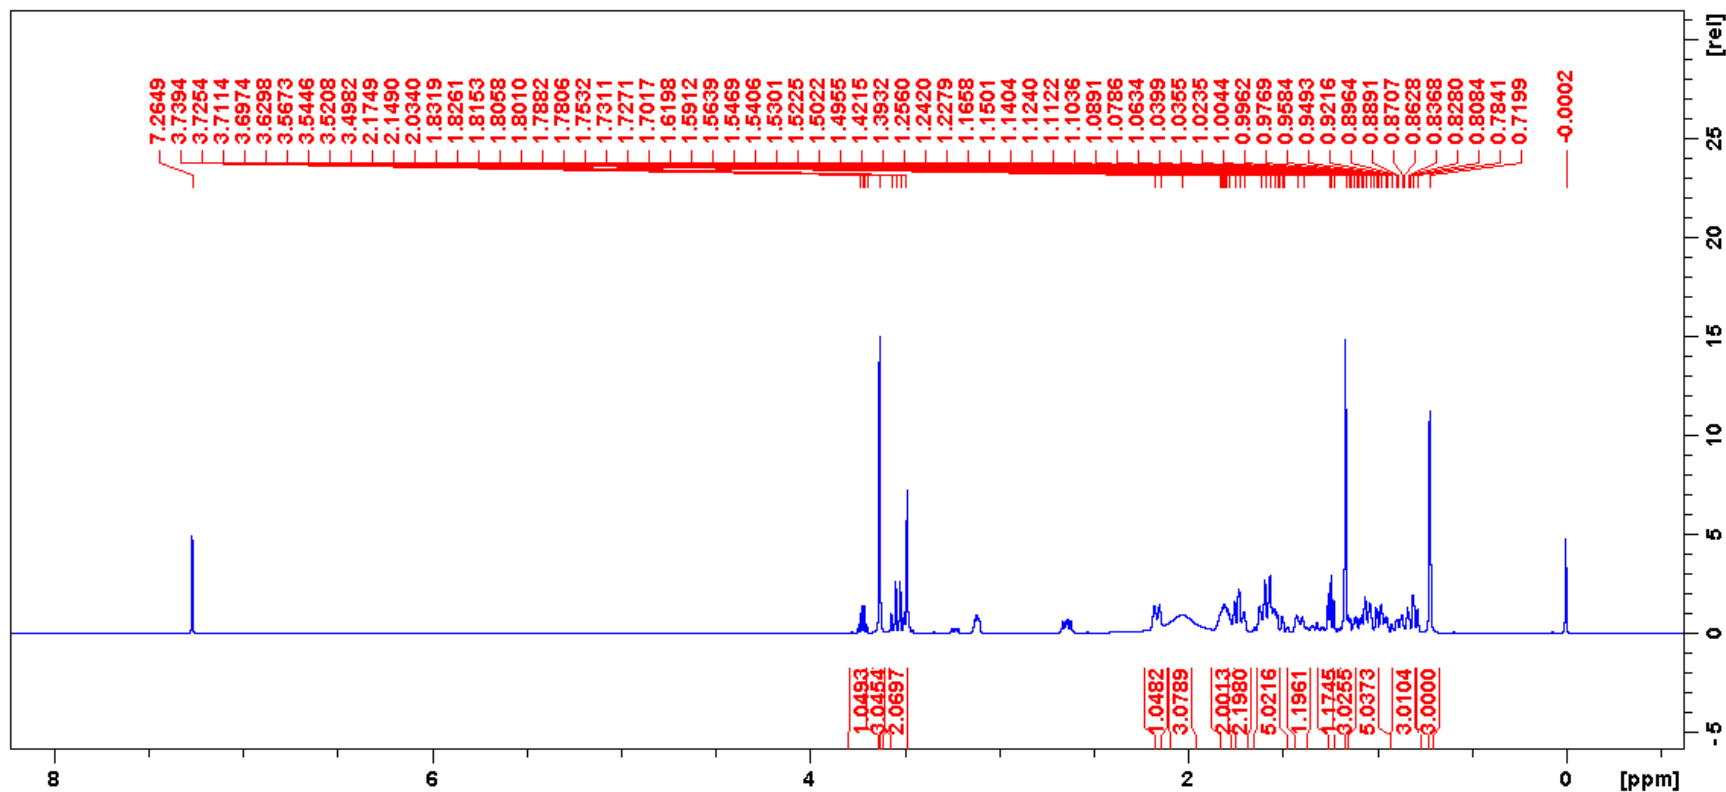

$^{13}\text{C}$ -NMR of compound (4*R*,4*aS*,6*aR*,8*S*,9*R*,11*aR*,11*bS*)-methyl 8-amino-9-(hydroxymethyl)-4,11*b*-dimethyltetradecahydro-6*a*,9-methanocyclohepta[*a*]naphthalene-4-carboxylate (**7**)

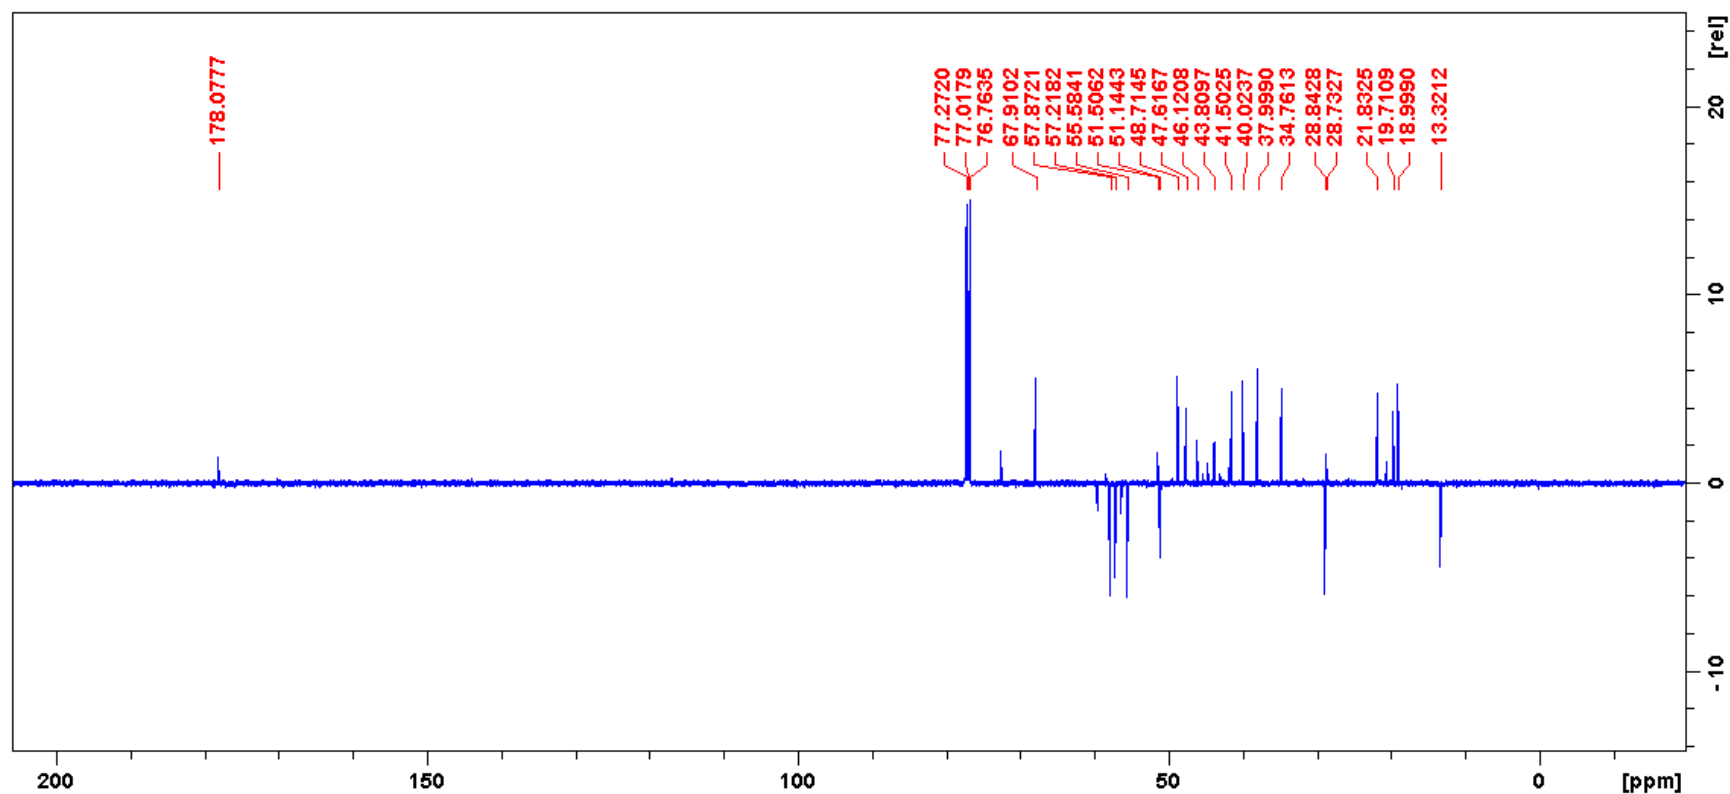

COSY of compound (4*R*,4*aS*,6*aR*,8*S*,9*R*,11*aR*,11*bS*)-methyl 8-amino-9-(hydroxymethyl)-4,11*b*-dimethyltetradecahydro-6*a*,9-methanocyclohepta[*a*]naphthalene-4-carboxylate (**7**)

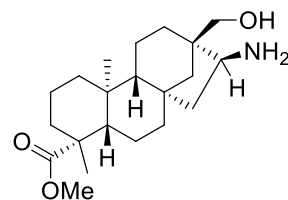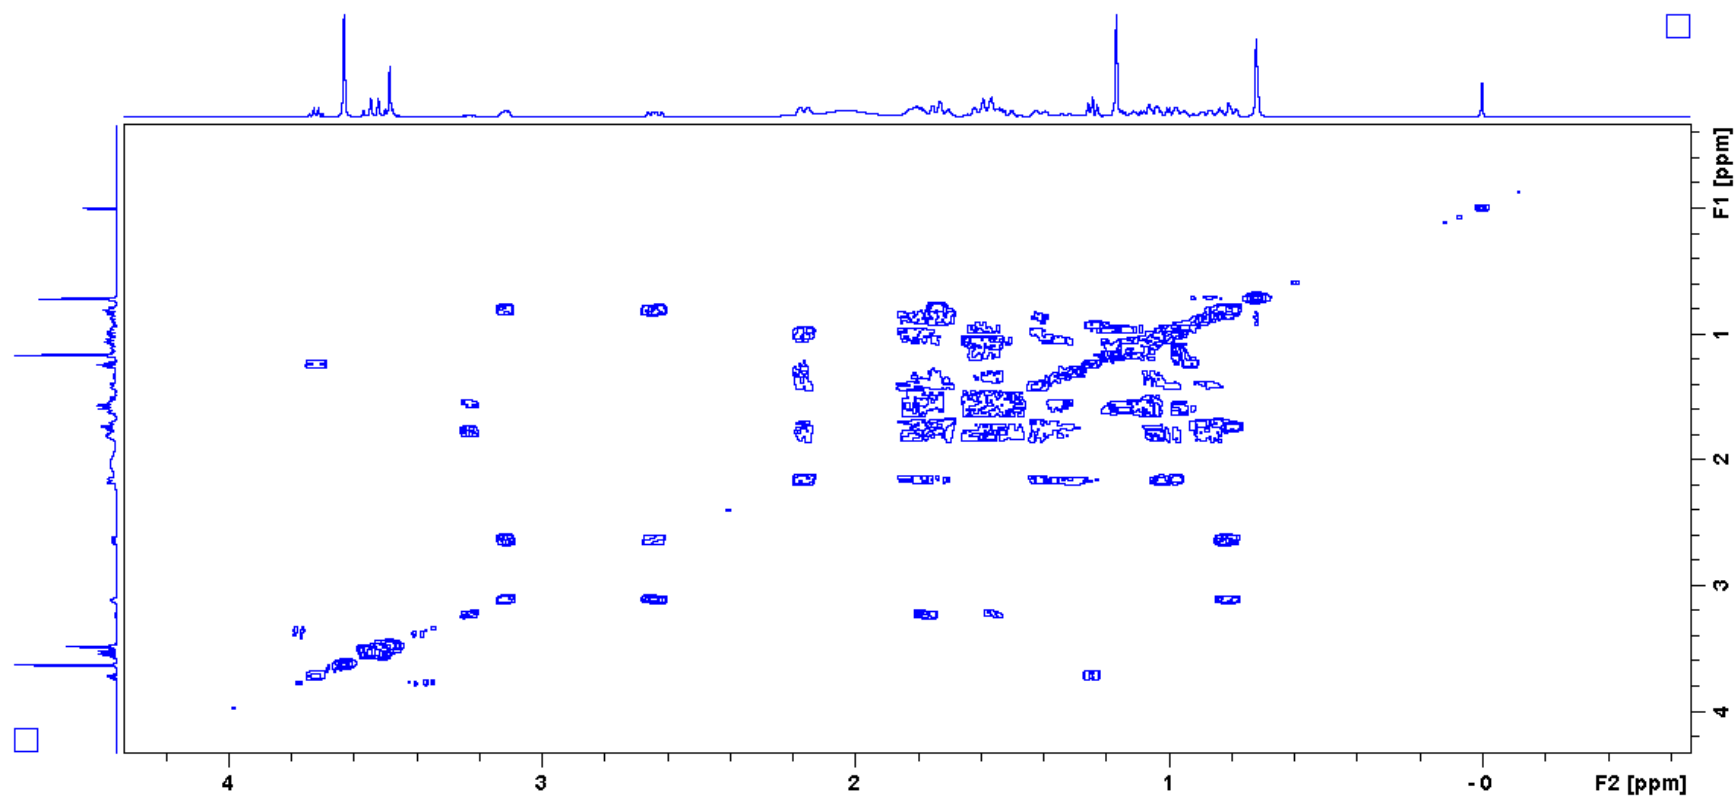

NOESY of compound (4*R*,4*aS*,6*aR*,8*S*,9*R*,11*aR*,11*bS*)-methyl 8-amino-9-(hydroxymethyl)-4,11*b*-dimethyltetradecahydro-6*a*,9-methanocyclohepta[*a*]naphthalene-4-carboxylate (**7**)

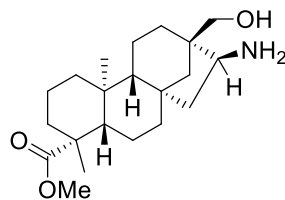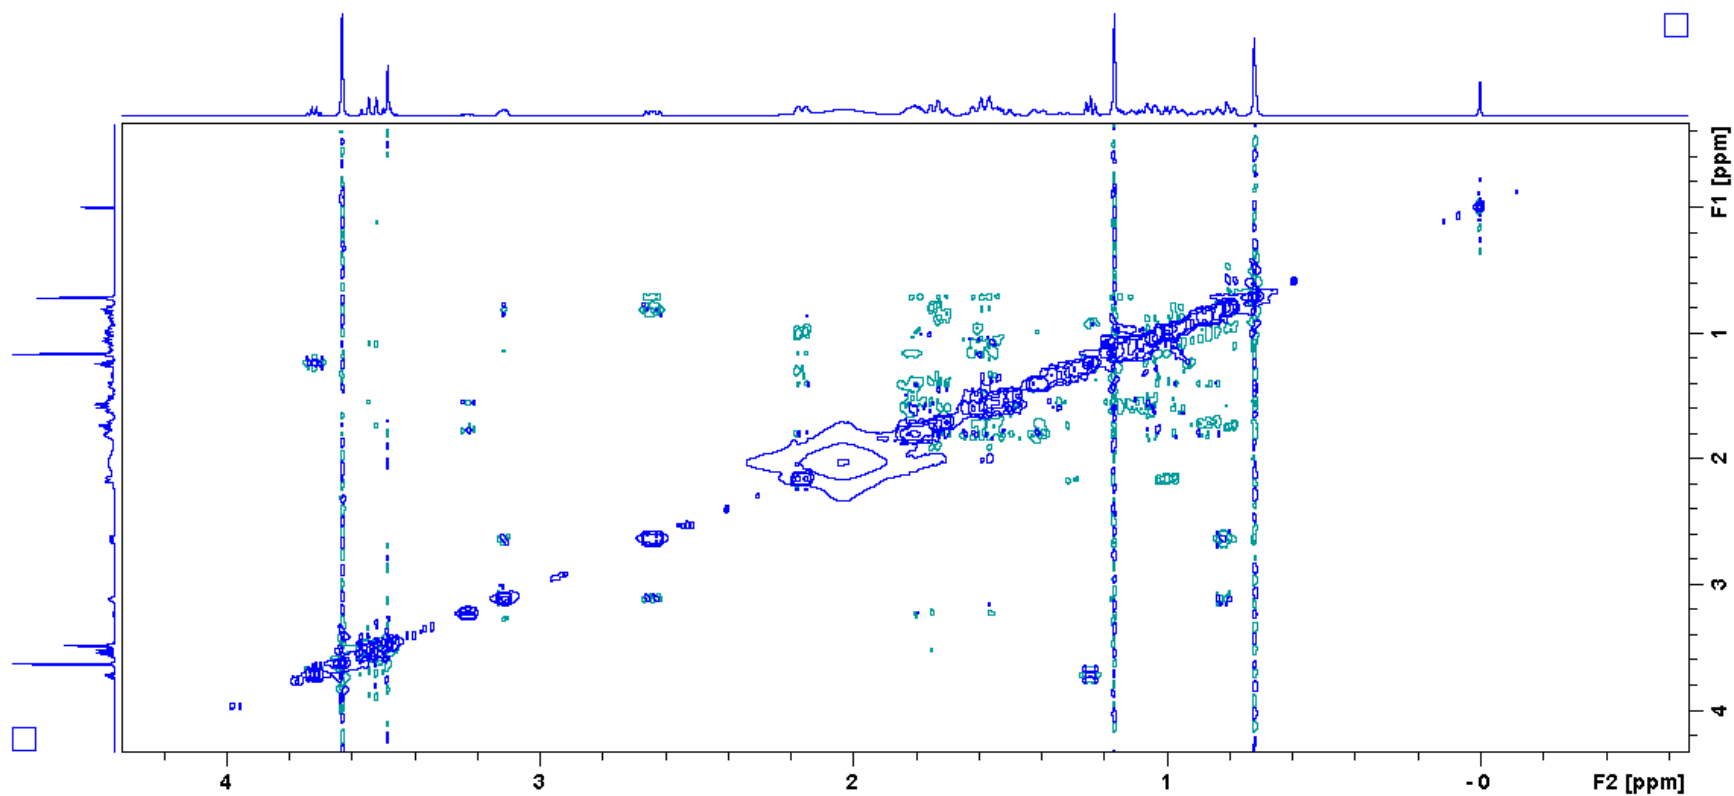

HSQC of compound (4*R*,4*aS*,6*aR*,8*S*,9*R*,11*aR*,11*bS*)-methyl 8-amino-9-(hydroxymethyl)-4,11*b*-dimethyltetradecahydro-6*a*,9-methanocyclohepta[*a*]naphthalene-4-carboxylate (**7**)

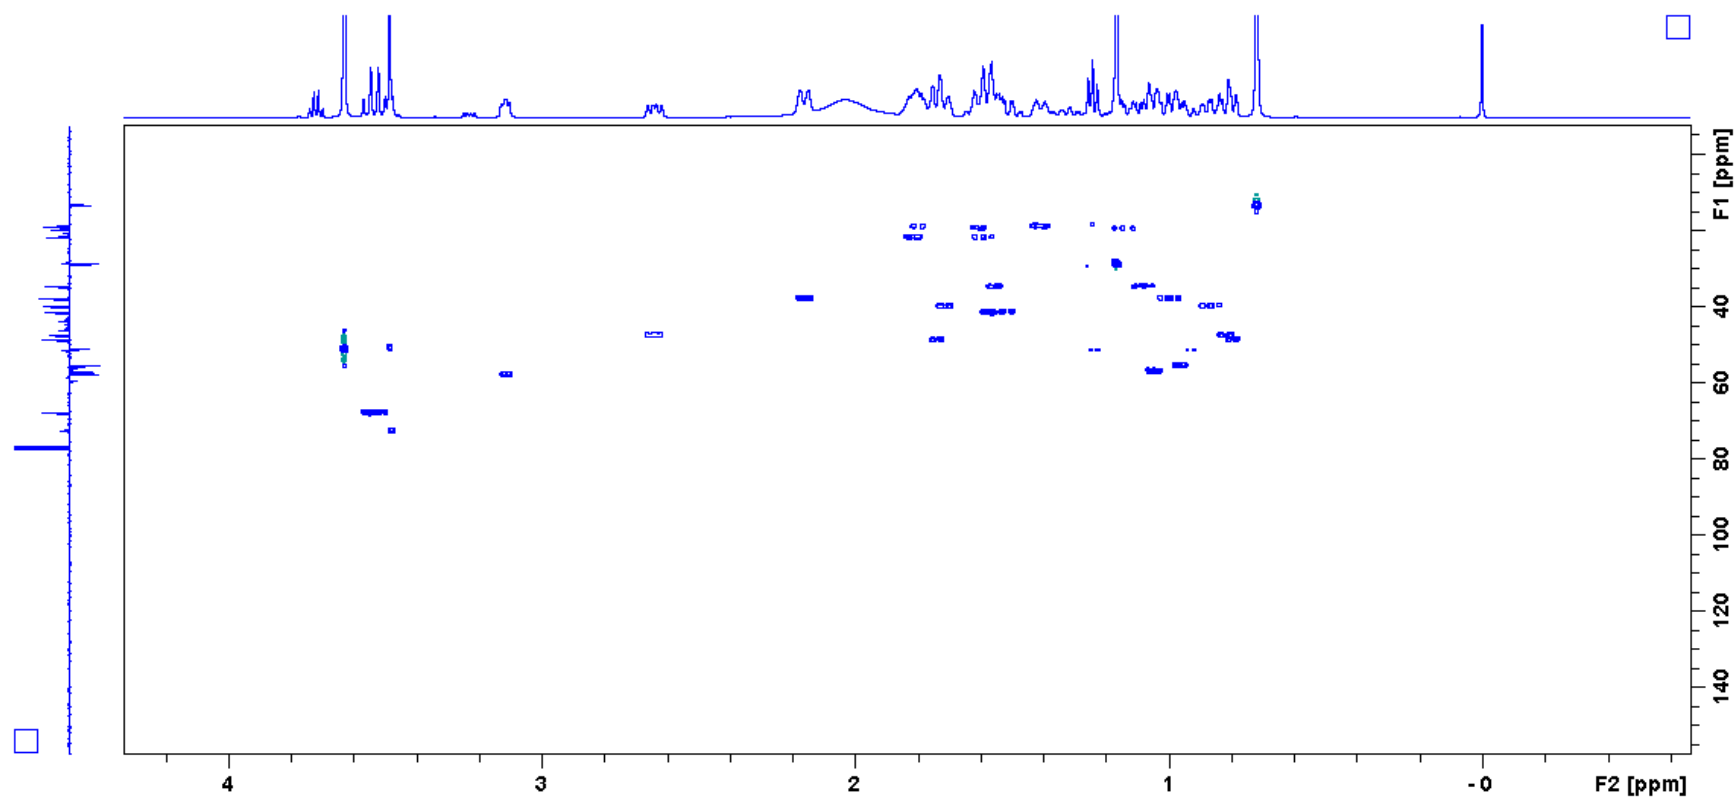

HMBC of compound (4*R*,4*aS*,6*aR*,8*S*,9*R*,11*aR*,11*bS*)-methyl 8-amino-9-(hydroxymethyl)-4,11*b*-dimethyltetradecahydro-6*a*,9-methanocyclohepta[*a*]naphthalene-4-carboxylate (**7**)

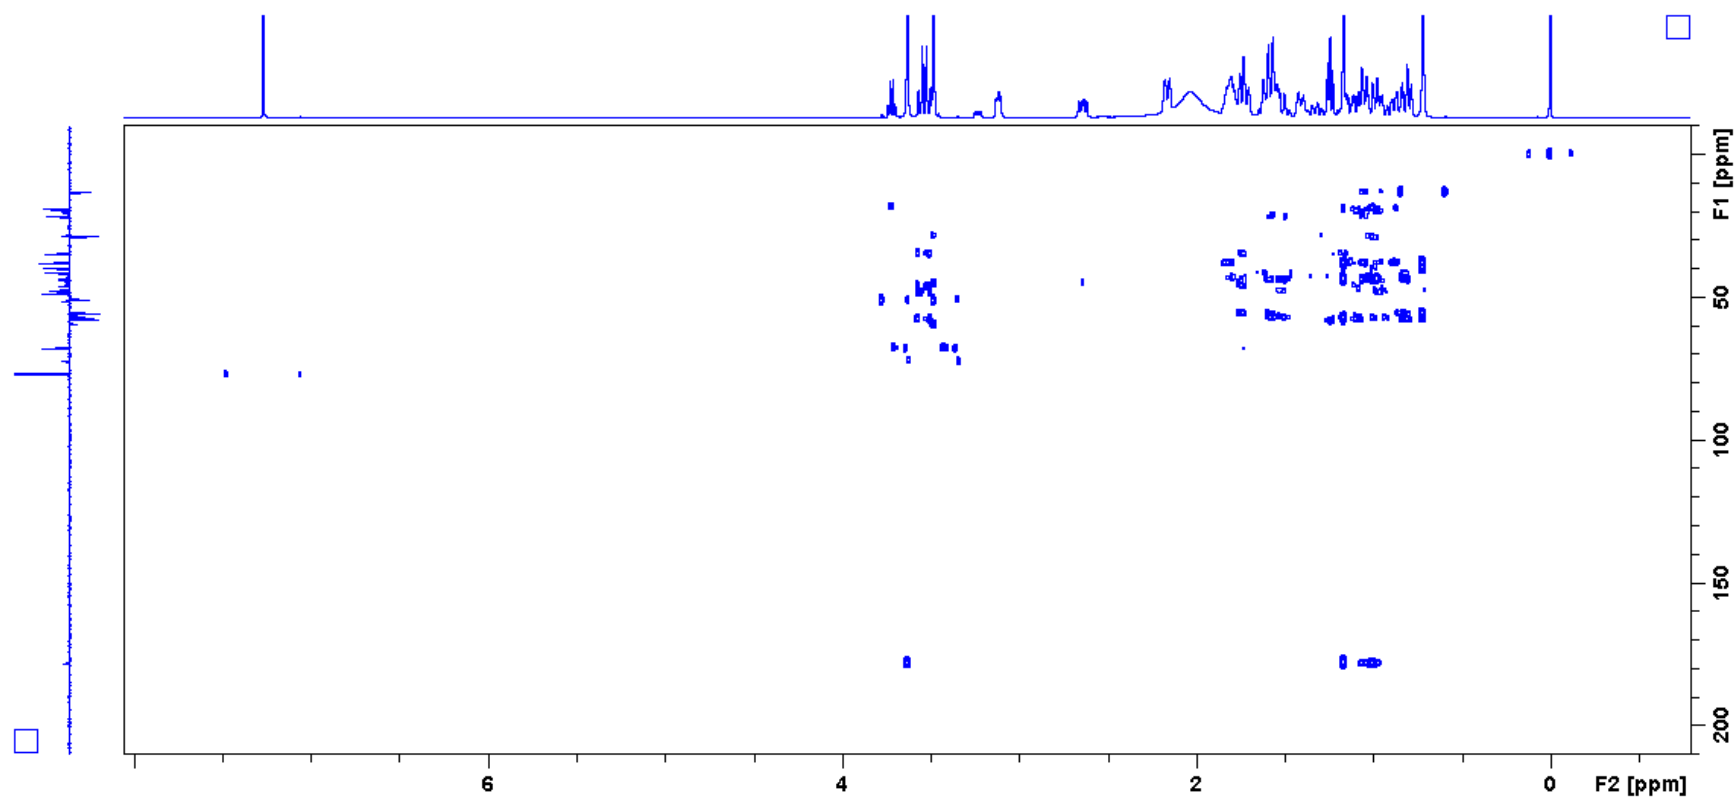

$^1\text{H}$ -NMR of compound (4*R*,4*aS*,6*aR*,8*R*,9*R*,11*aR*,11*bS*)-methyl 8-(benzylamino)-9-(hydroxymethyl)-4,11b-dimethyltetradecahydro-6*a*,9-methanocyclohepta[*a*]naphthalene-4-carboxylate (**8**)

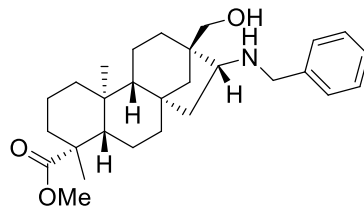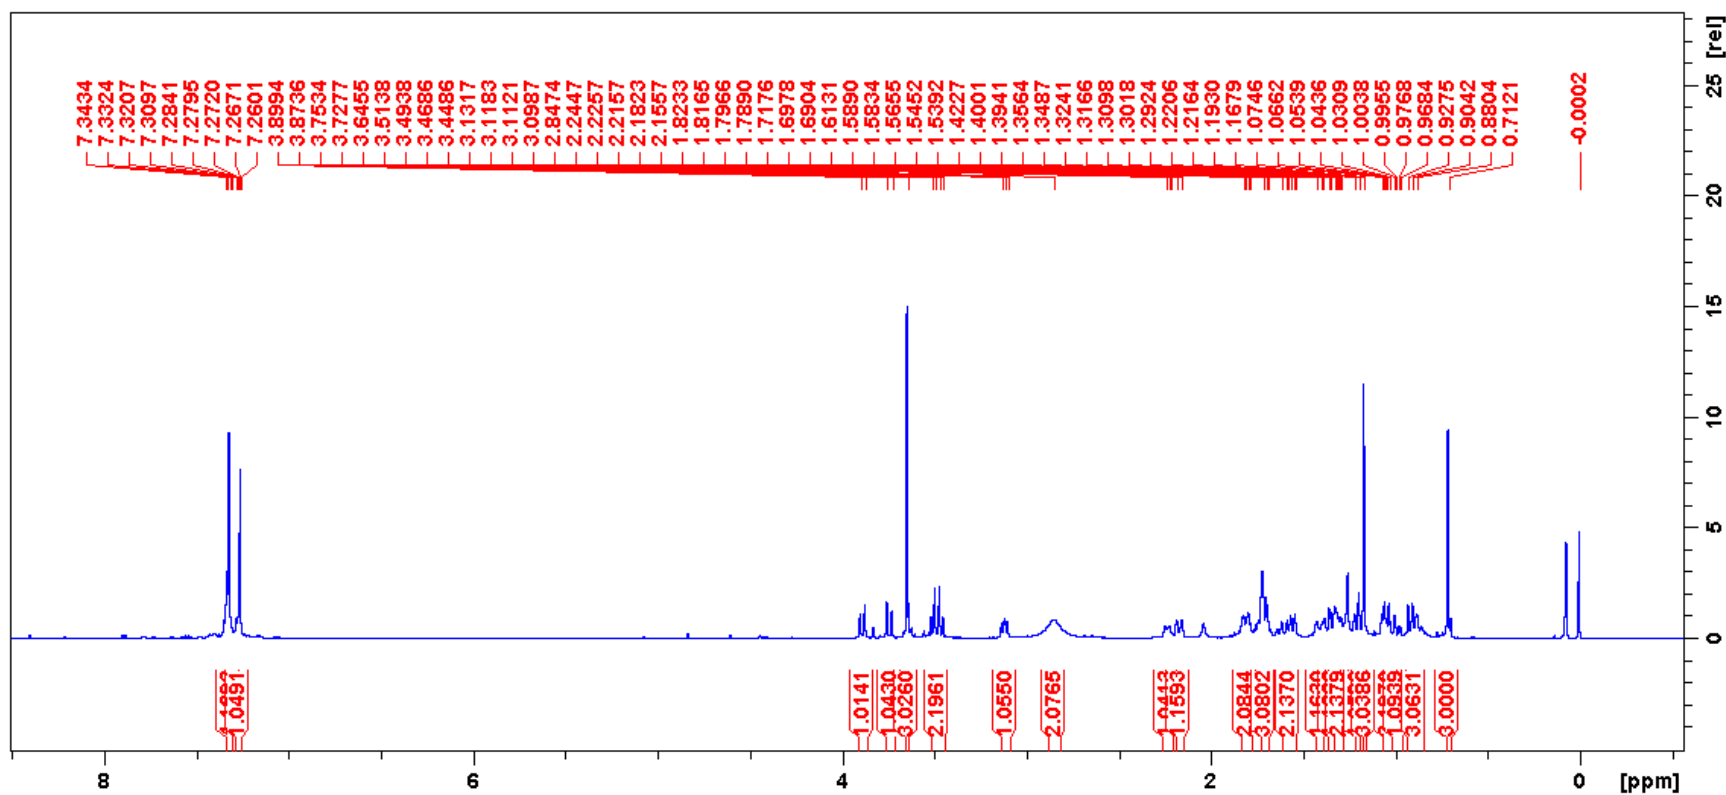



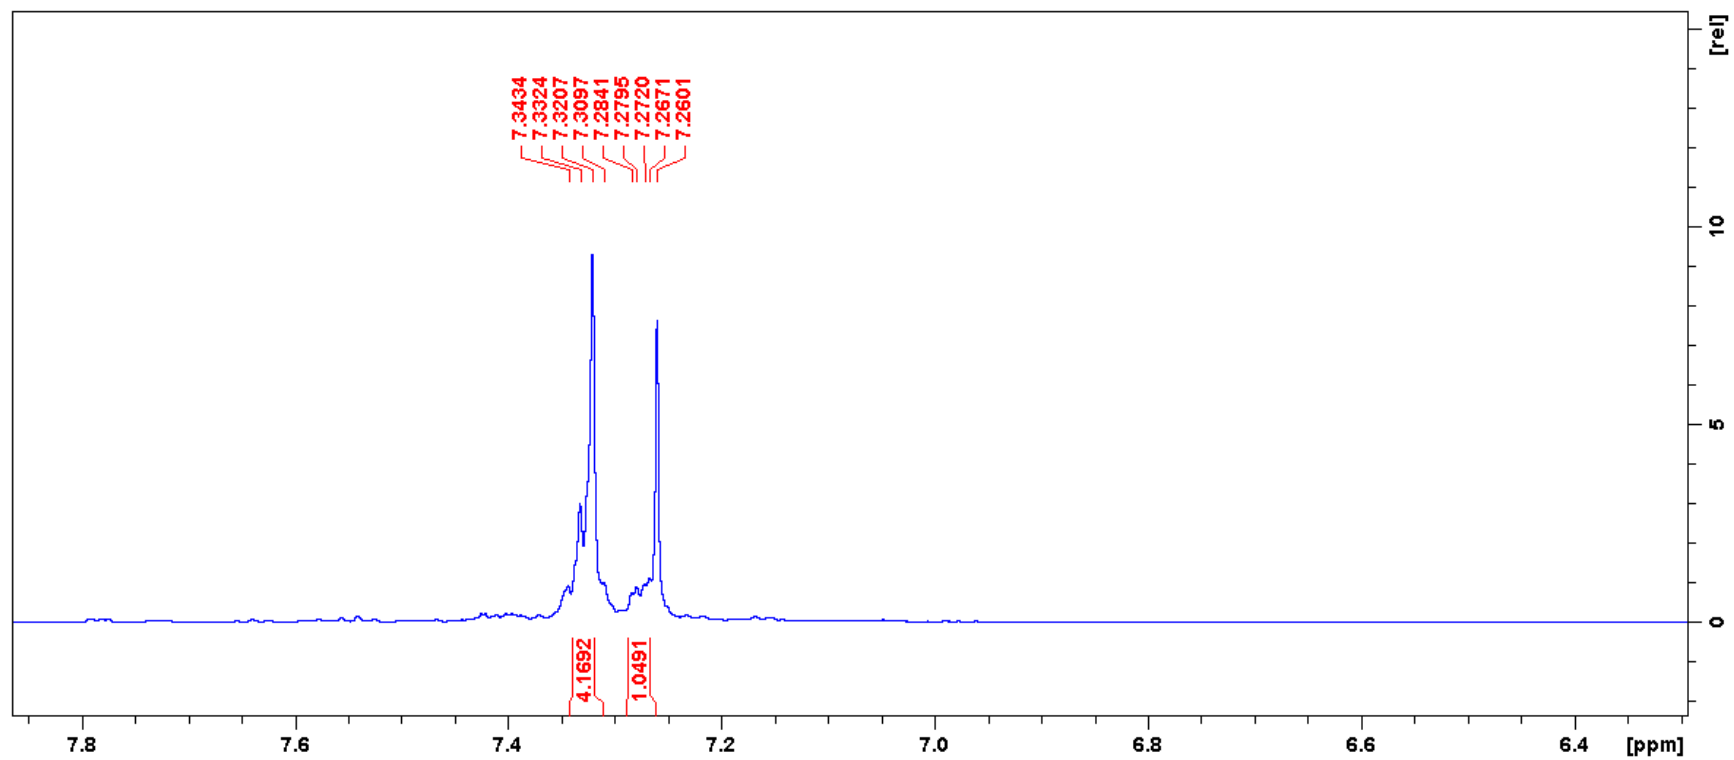

$^{13}\text{C}$ -NMR of compound (4*R*,4*aS*,6*aR*,8*R*,9*R*,11*aR*,11*bS*)-methyl 8-(benzylamino)-9-(hydroxymethyl)-4,11b-dimethyltetradecahydro-6*a*,9-methanocyclohepta[*a*]naphthalene-4-carboxylate (**8**)

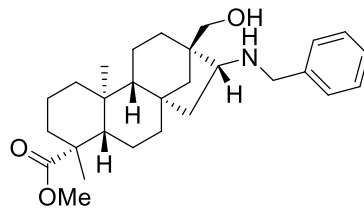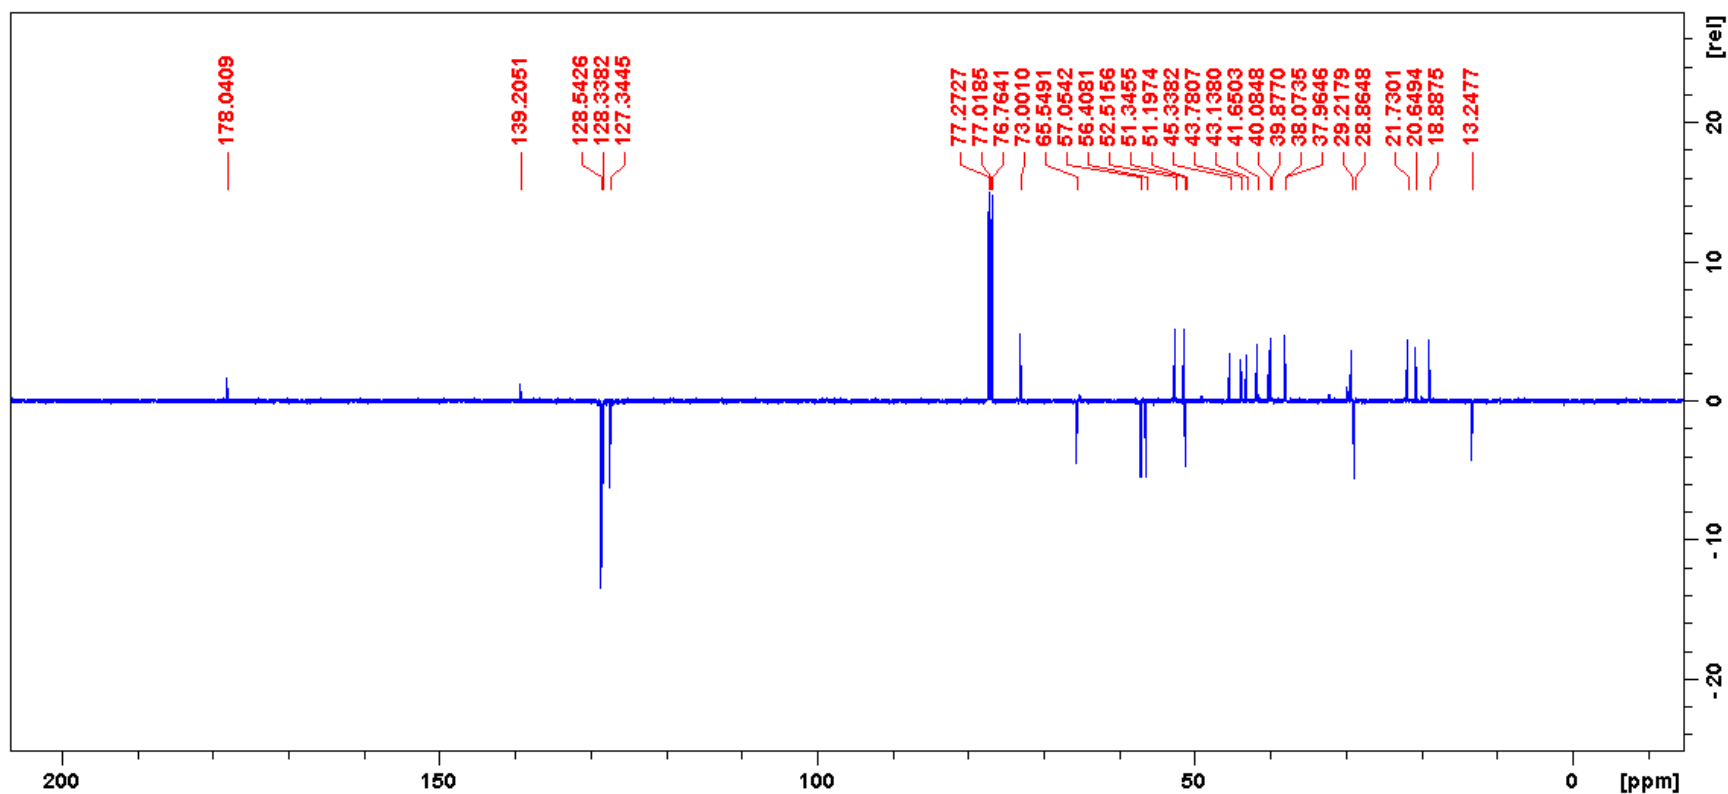

COSY of compound (4*R*,4*aS*,6*aR*,8*R*,9*R*,11*aR*,11*bS*)-methyl 8-(benzylamino)-9-(hydroxymethyl)-4,11b-dimethyltetradecahydro-6*a*,9-methanocyclohepta[*a*]naphthalene-4-carboxylate (**8**)

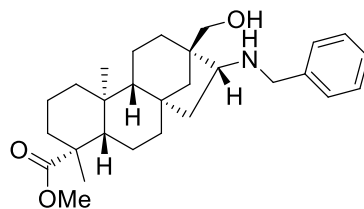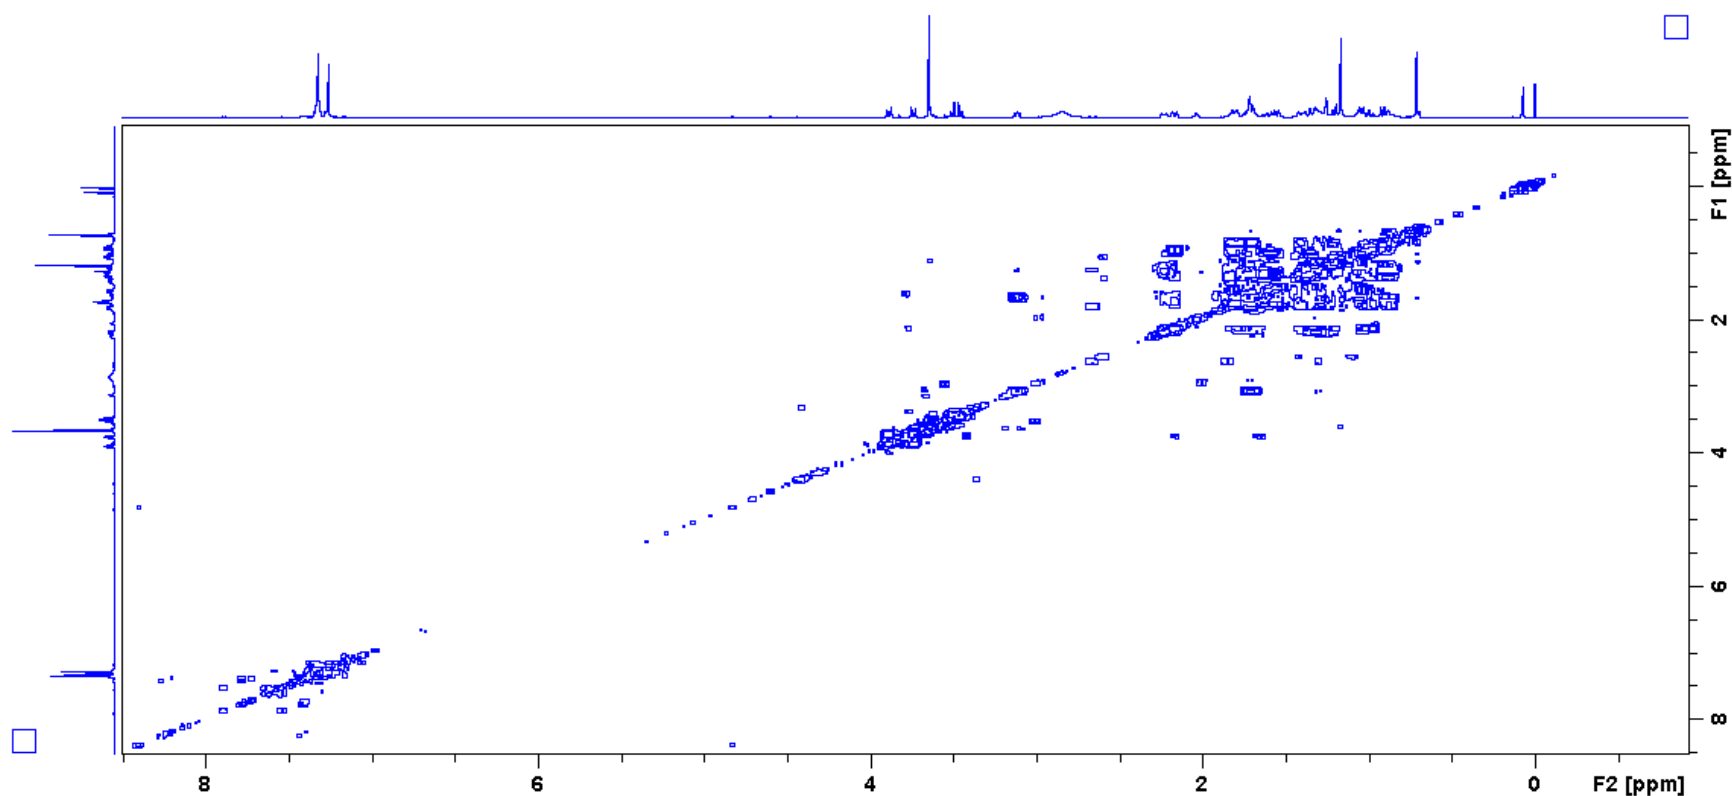

NOESY of compound (4*R*,4*aS*,6*aR*,8*R*,9*R*,11*aR*,11*bS*)-methyl 8-(benzylamino)-9-(hydroxymethyl)-4,11b-dimethyltetradecahydro-6*a*,9-methanocyclohepta[*a*]naphthalene-4-carboxylate (**8**)

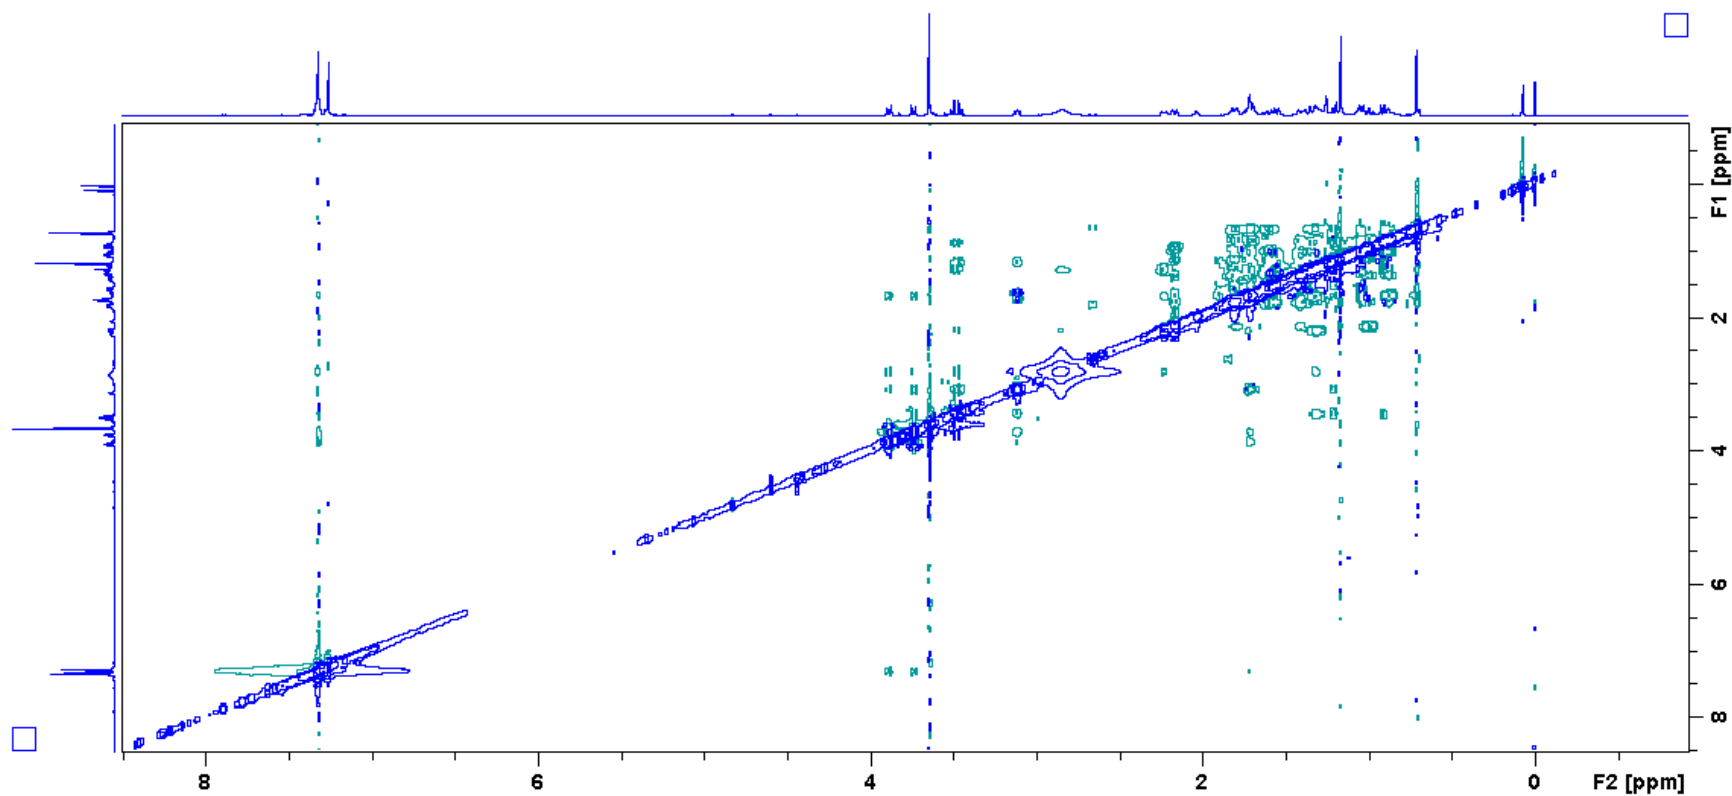

HSQC of compound (4*R*,4*aS*,6*aR*,8*R*,9*R*,11*aR*,11*bS*)-methyl 8-(benzylamino)-9-(hydroxymethyl)-4,11b-dimethyltetradecahydro-6*a*,9-methanocyclohepta[*a*]naphthalene-4-carboxylate (**8**)

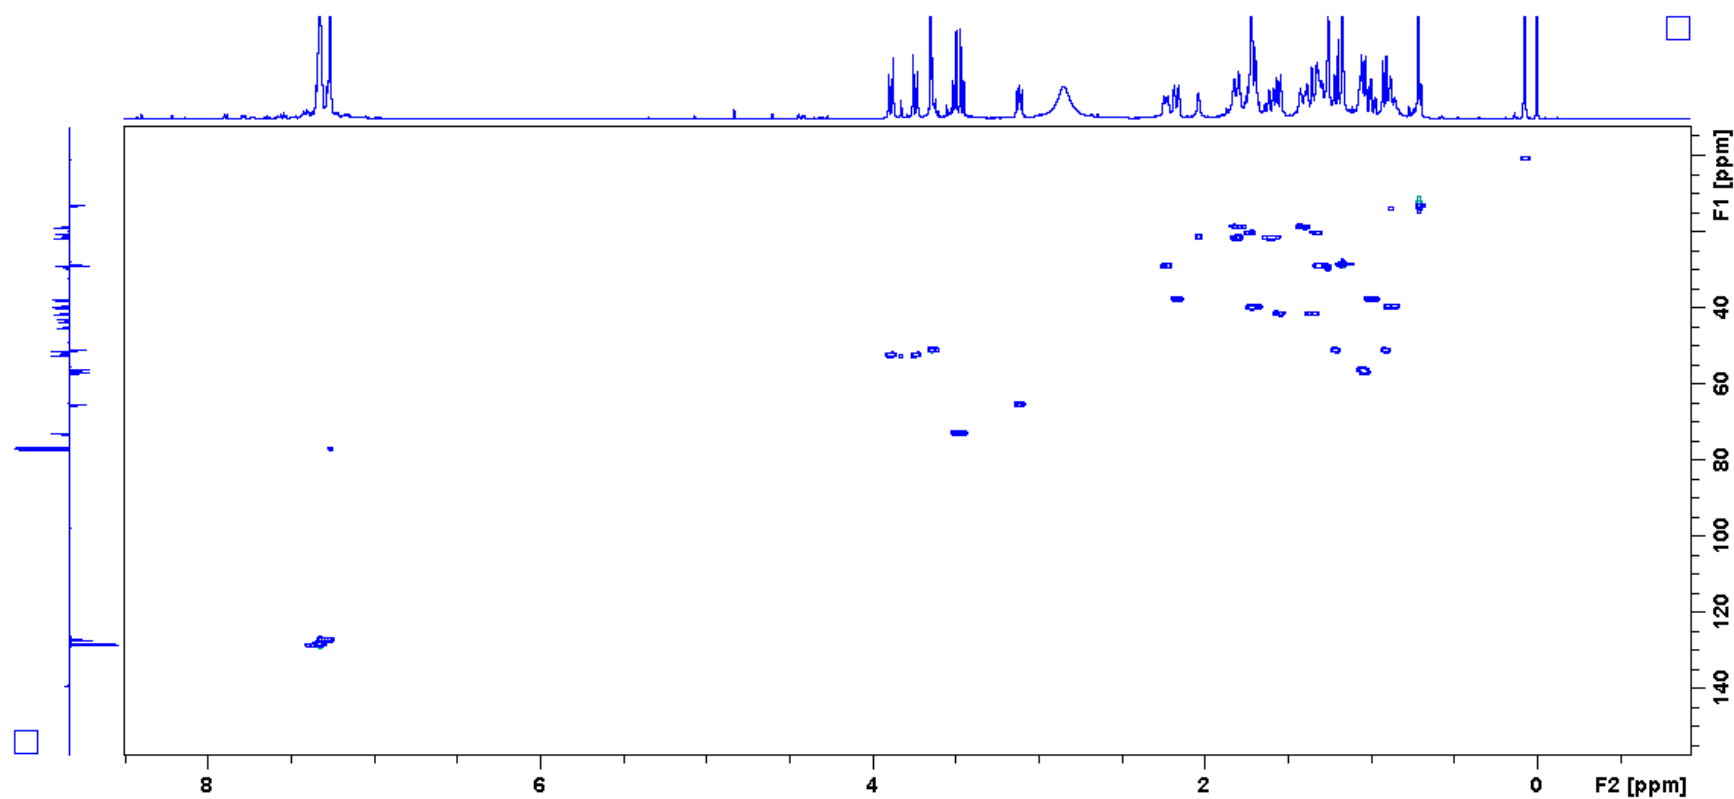

HMBC of compound (4*R*,4*aS*,6*aR*,8*R*,9*R*,11*aR*,11*bS*)-methyl 8-(benzylamino)-9-(hydroxymethyl)-4,11b-dimethyltetradecahydro-6*a*,9-methanocyclohepta[*a*]naphthalene-4-carboxylate (**8**)

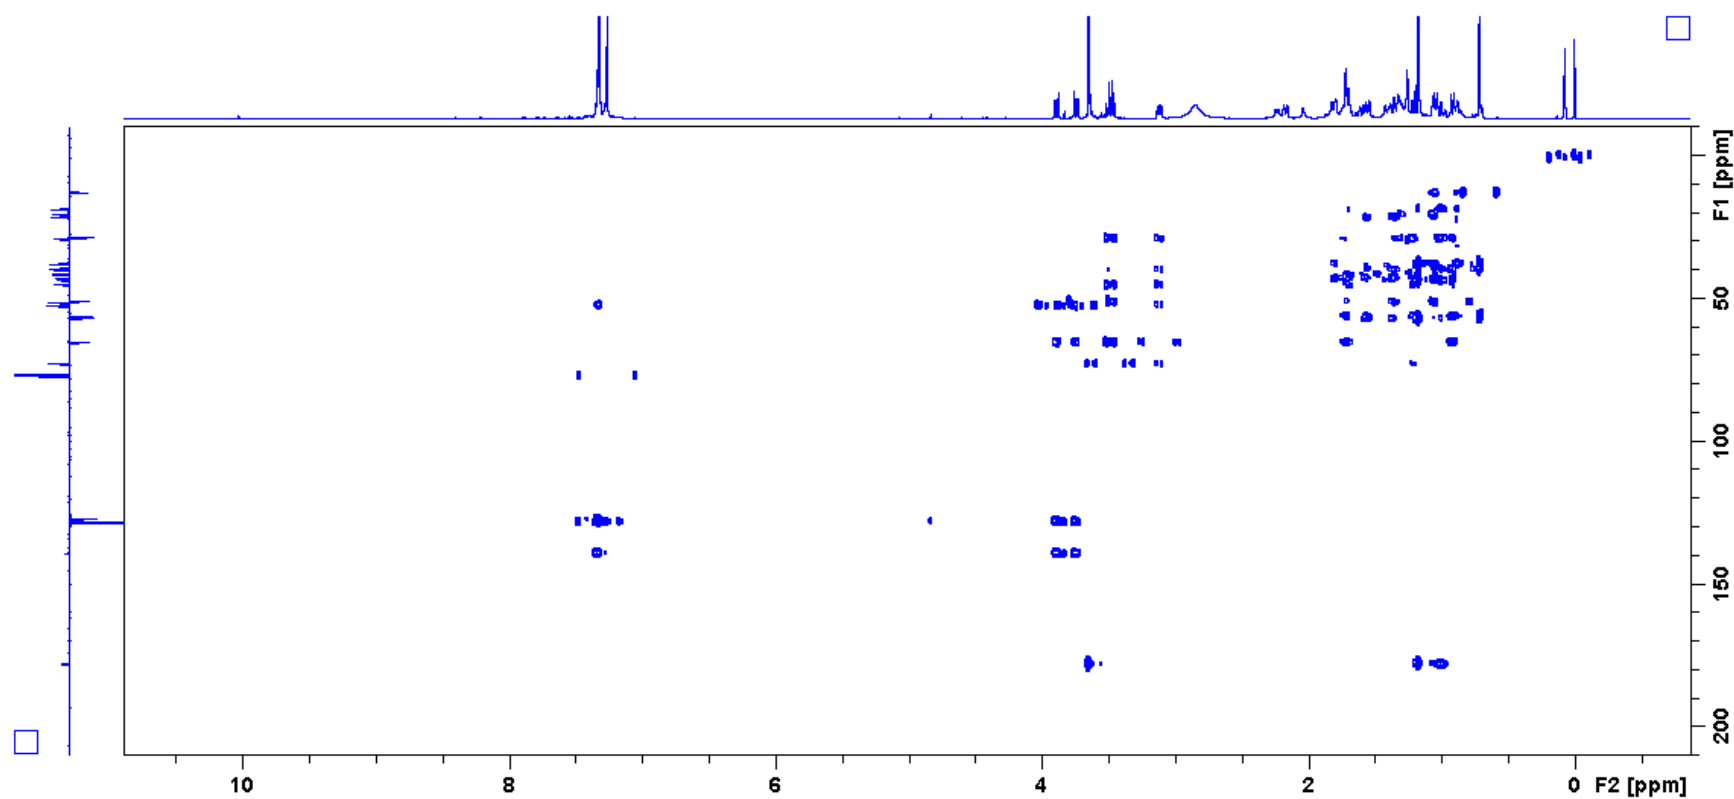

$^1\text{H}$ -NMR of compound (4*R*,4*aS*,6*aR*,8*R*,9*R*,11*aR*,11*bS*)-methyl 8-((4-fluorobenzyl)amino)-9-(hydroxymethyl)-4,11b-dimethyltetradecahydro-6*a*,9-methanocyclohepta[*a*]naphthalene-4-carboxylate (**9**)

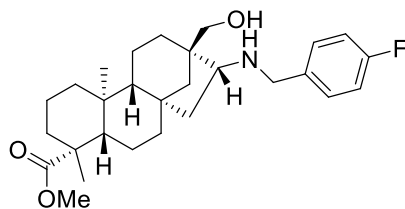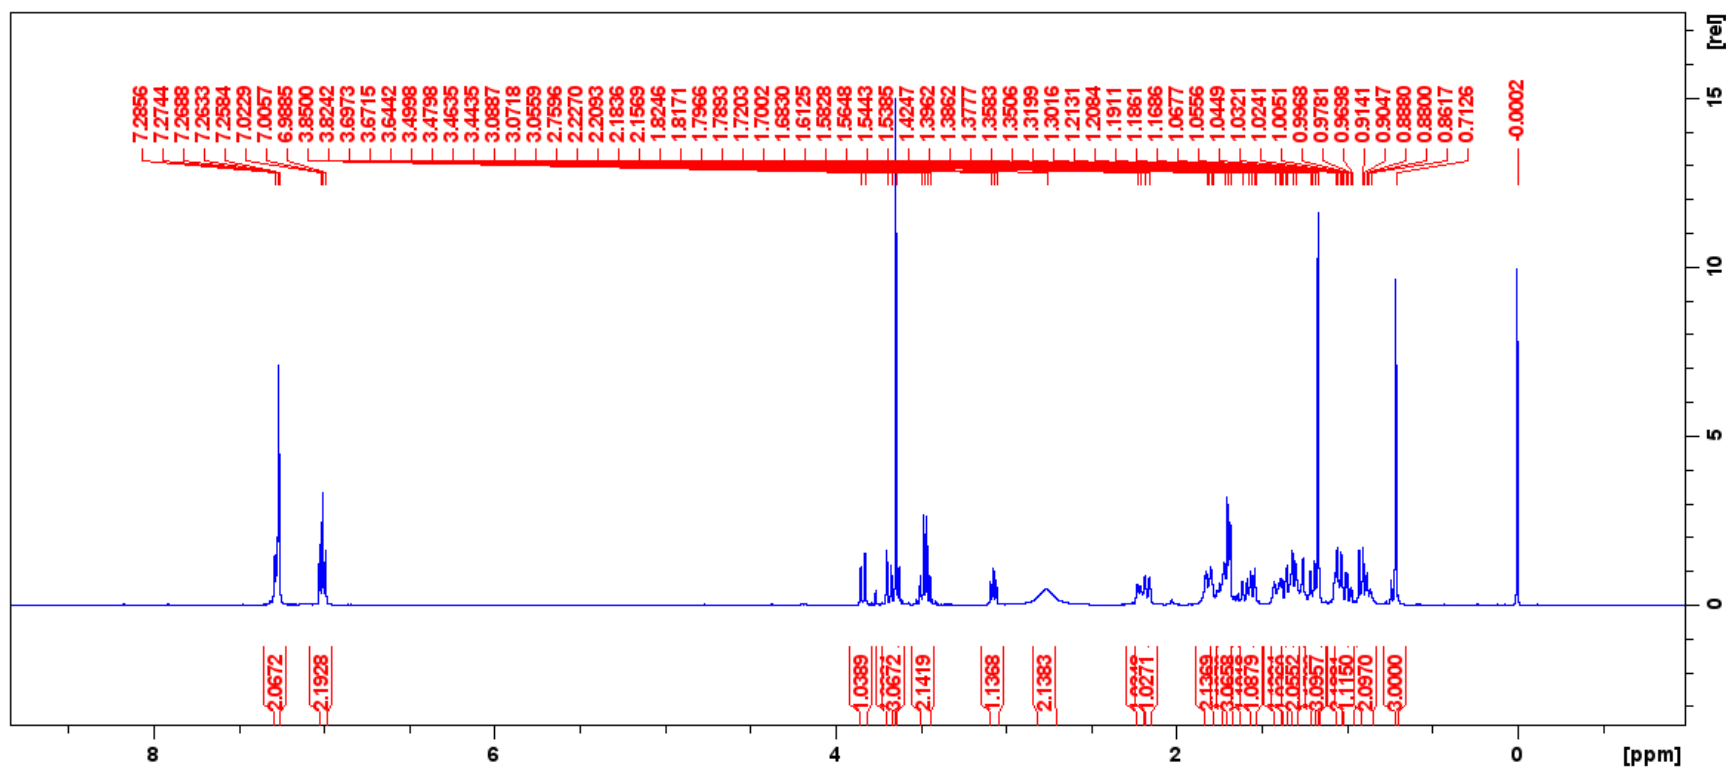

$^{13}\text{C}$ -NMR of compound (4*R*,4*aS*,6*aR*,8*R*,9*R*,11*aR*,11*bS*)-methyl 8-((4-fluorobenzyl)amino)-9-(hydroxymethyl)-4,11b-dimethyltetradecahydro-6*a*,9-methanocyclohepta[*a*]naphthalene-4-carboxylate (**9**)

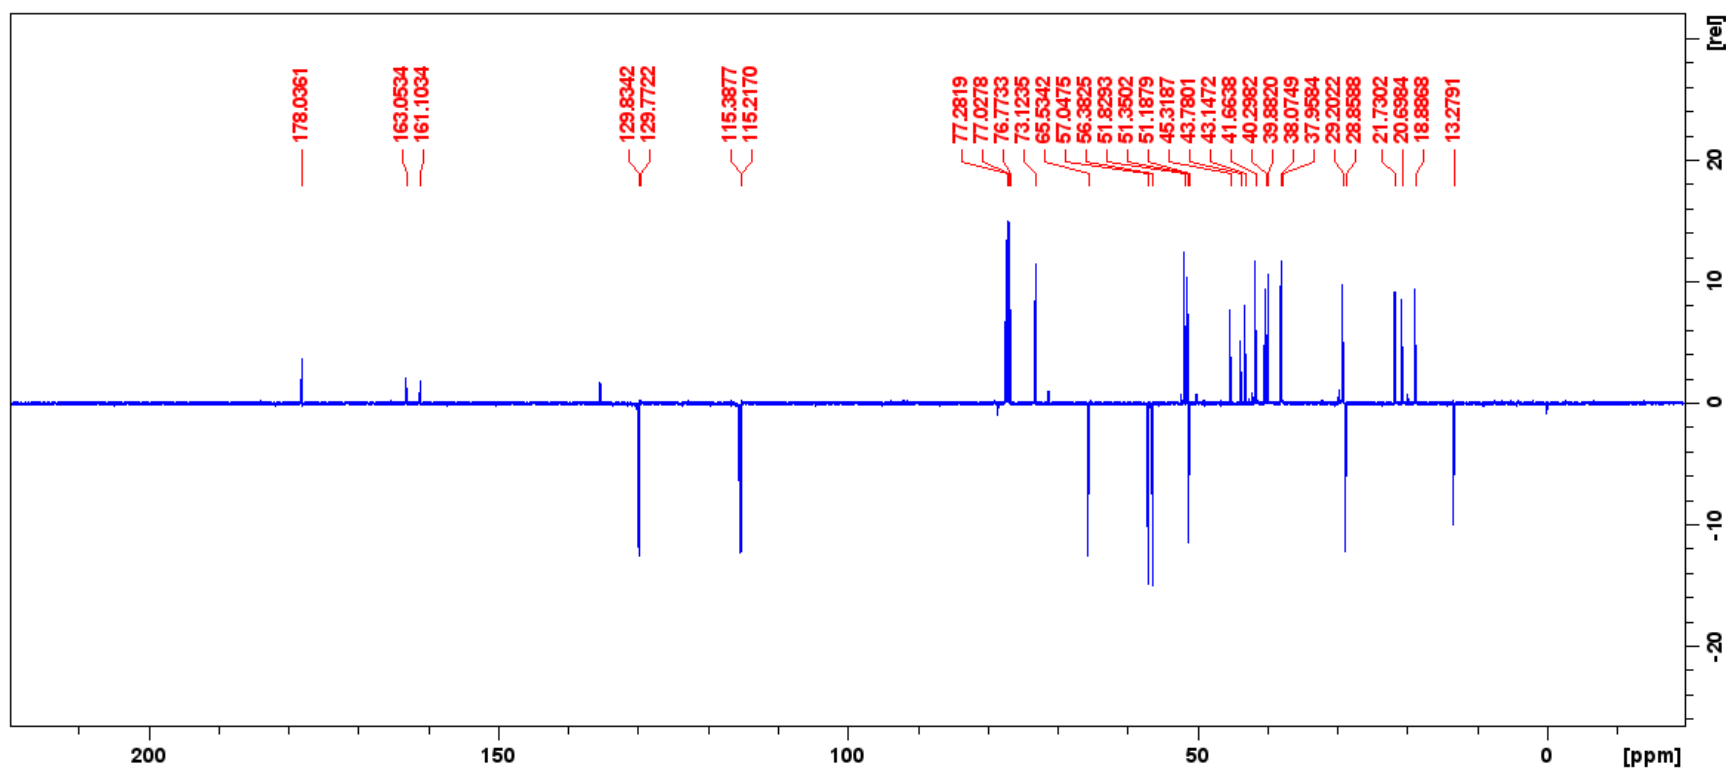



COSY of compound (4*R*,4*aS*,6*aR*,8*R*,9*R*,11*aR*,11*bS*)-methyl 8-((4-fluorobenzyl)amino)-9-(hydroxymethyl)-4,11b-dimethyltetradecahydro-6*a*,9-methanocyclohepta[*a*]naphthalene-4-carboxylate (**9**)

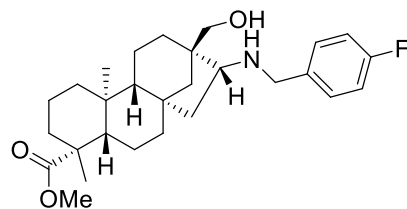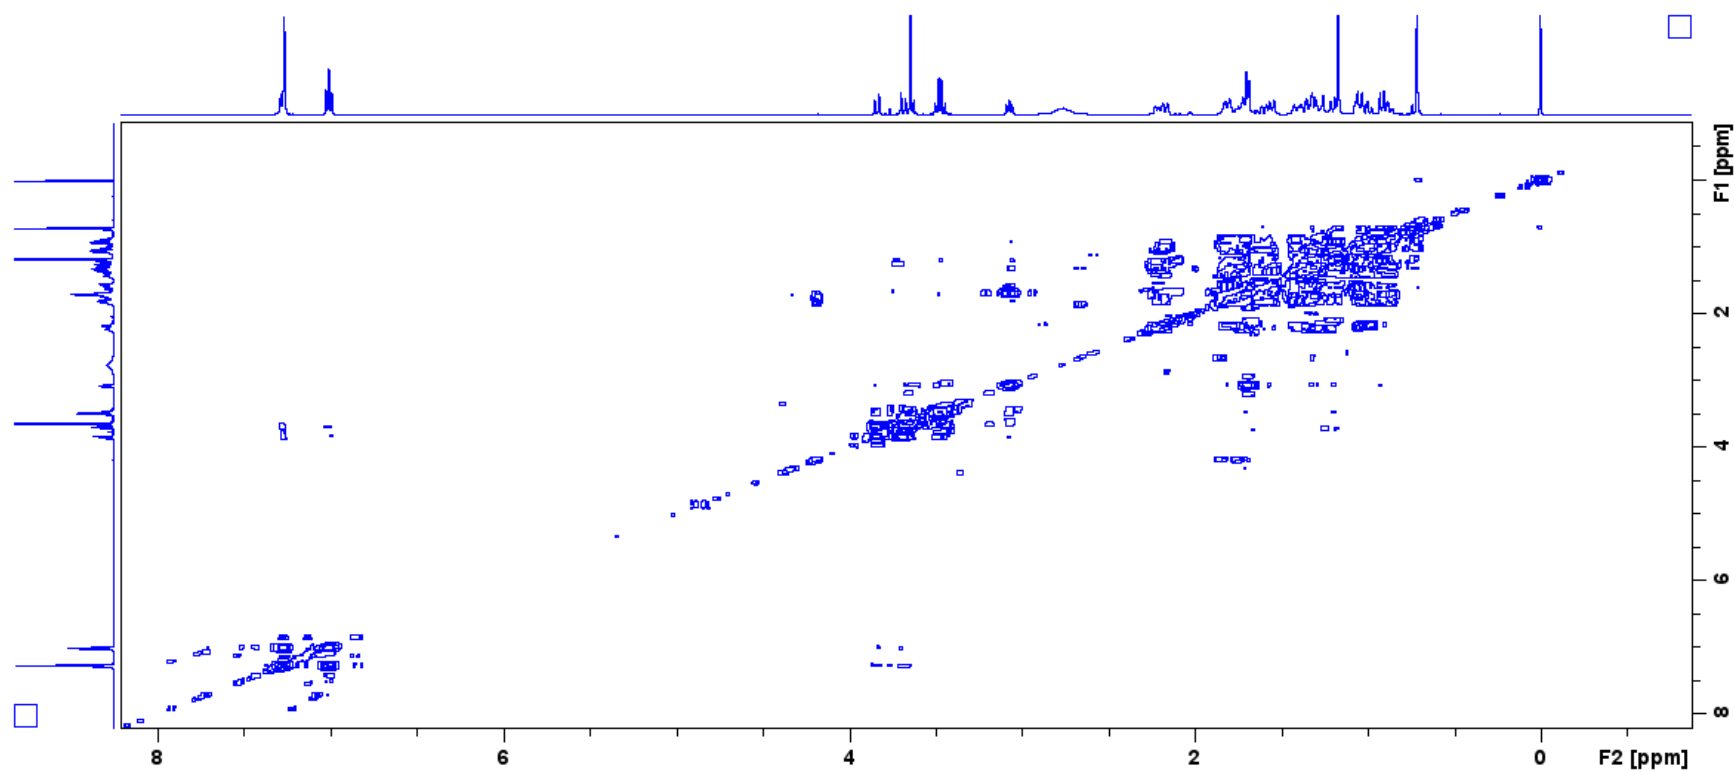

NOESY of compound (4*R*,4*aS*,6*aR*,8*R*,9*R*,11*aR*,11*bS*)-methyl 8-((4-fluorobenzyl)amino)-9-(hydroxymethyl)-4,11b-dimethyltetradecahydro-6*a*,9-methanocyclohepta[*a*]naphthalene-4-carboxylate (**9**)

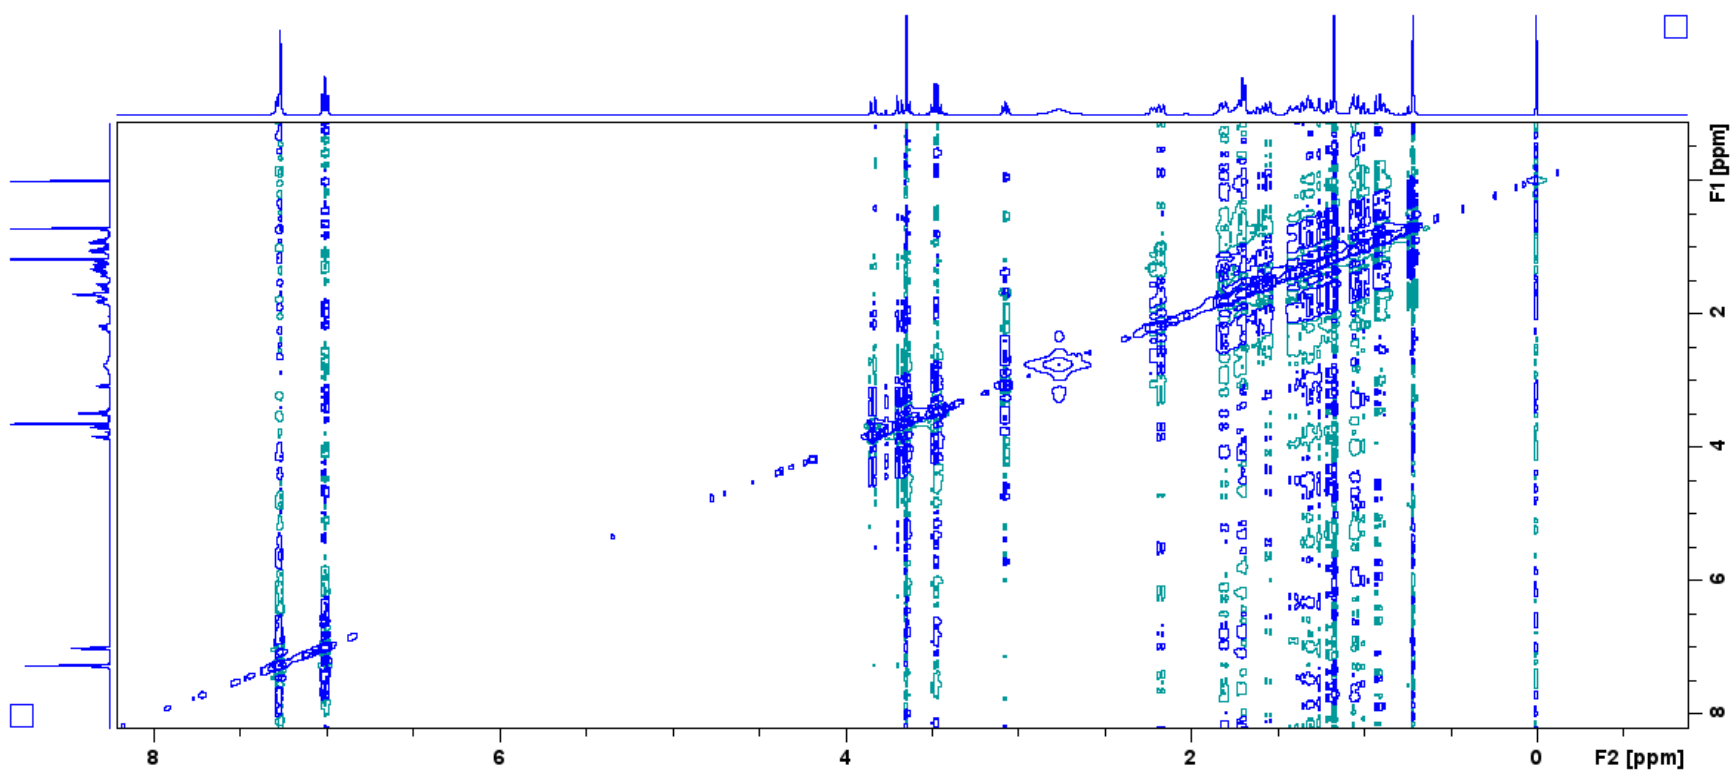

HSQC of compound (4*R*,4*aS*,6*aR*,8*R*,9*R*,11*aR*,11*bS*)-methyl 8-((4-fluorobenzyl)amino)-9-(hydroxymethyl)-4,11b-dimethyltetradecahydro-6*a*,9-methanocyclohepta[*a*]naphthalene-4-carboxylate (**9**)

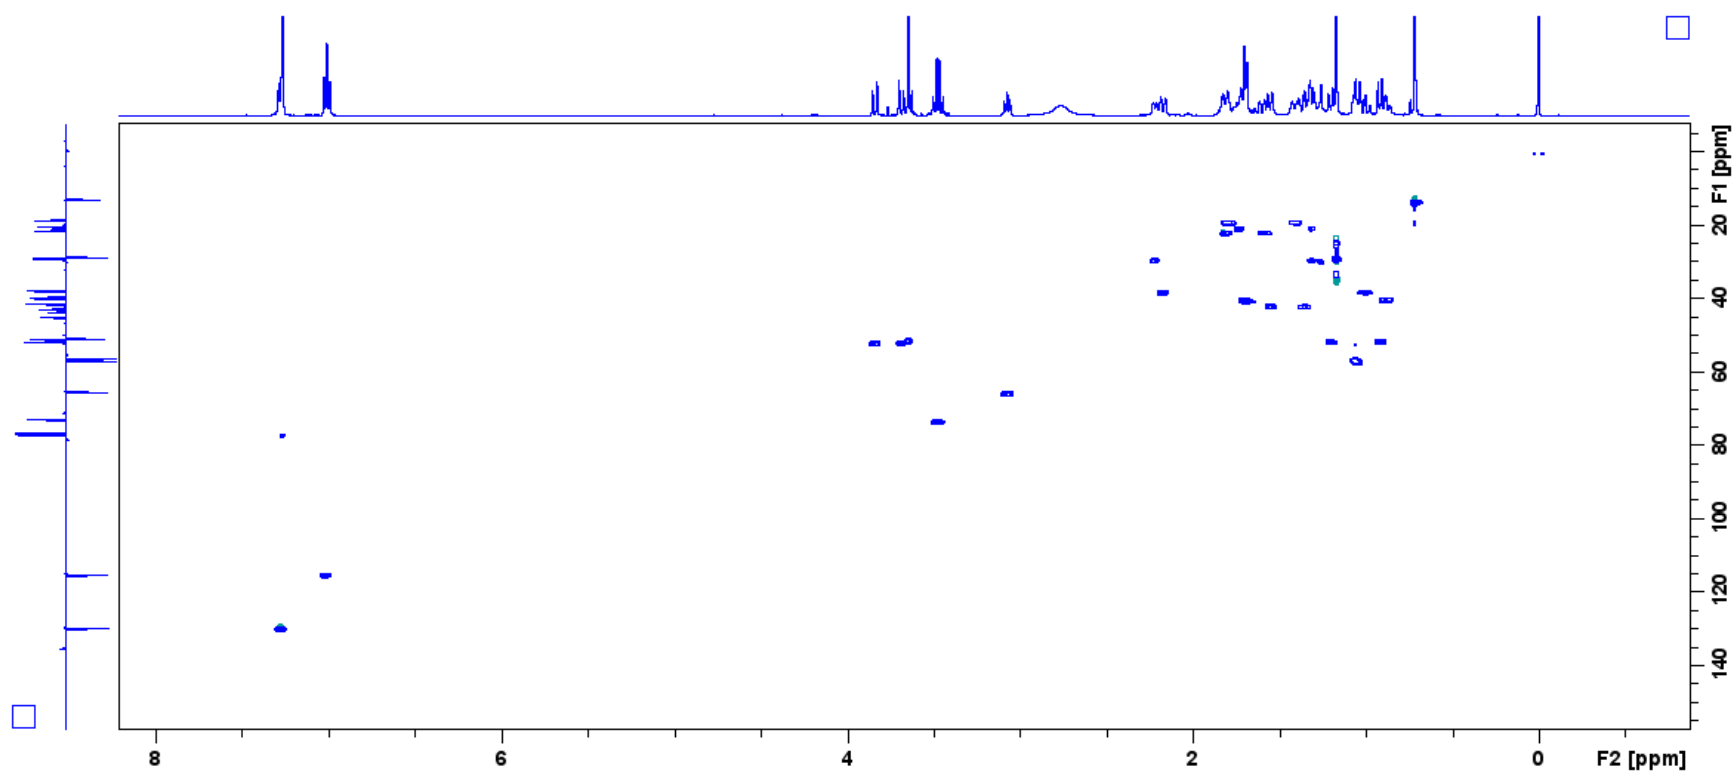

HMBC of compound (4*R*,4*aS*,6*aR*,8*R*,9*R*,11*aR*,11*bS*)-methyl 8-((4-fluorobenzyl)amino)-9-(hydroxymethyl)-4,11b-dimethyltetradecahydro-6*a*,9-methanocyclohepta[*a*]naphthalene-4-carboxylate (**9**)

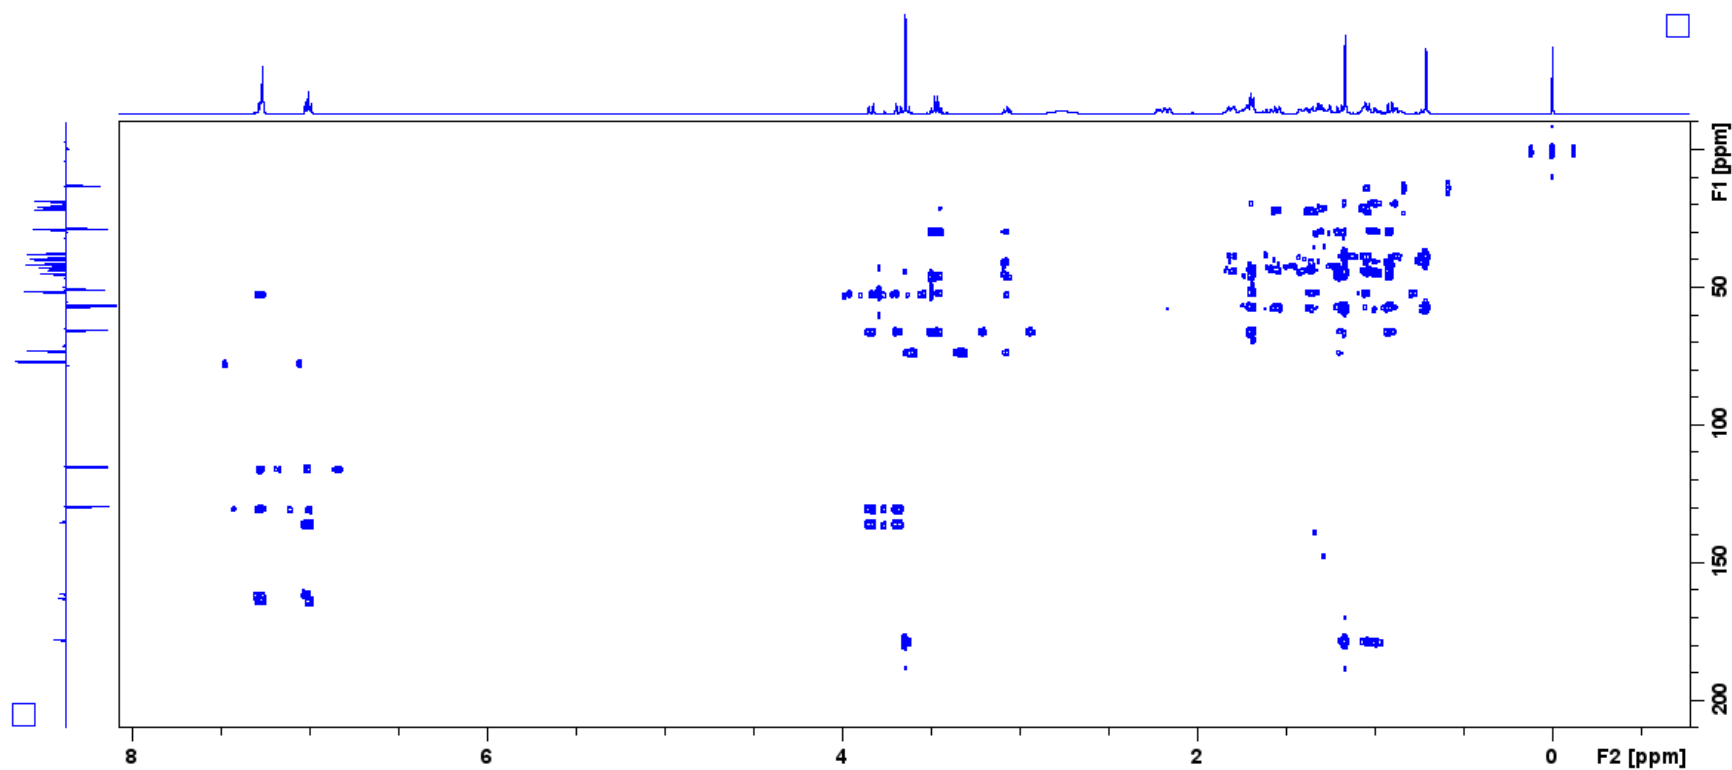

$^{19}\text{F}$ -NMR of compound (4*R*,4*aS*,6*aR*,8*R*,9*R*,11*aR*,11*bS*)-methyl 8-((4-fluorobenzyl)amino)-9-(hydroxymethyl)-4,11b-dimethyltetradecahydro-6*a*,9-methanocyclohepta[*a*]naphthalene-4-carboxylate (**9**)

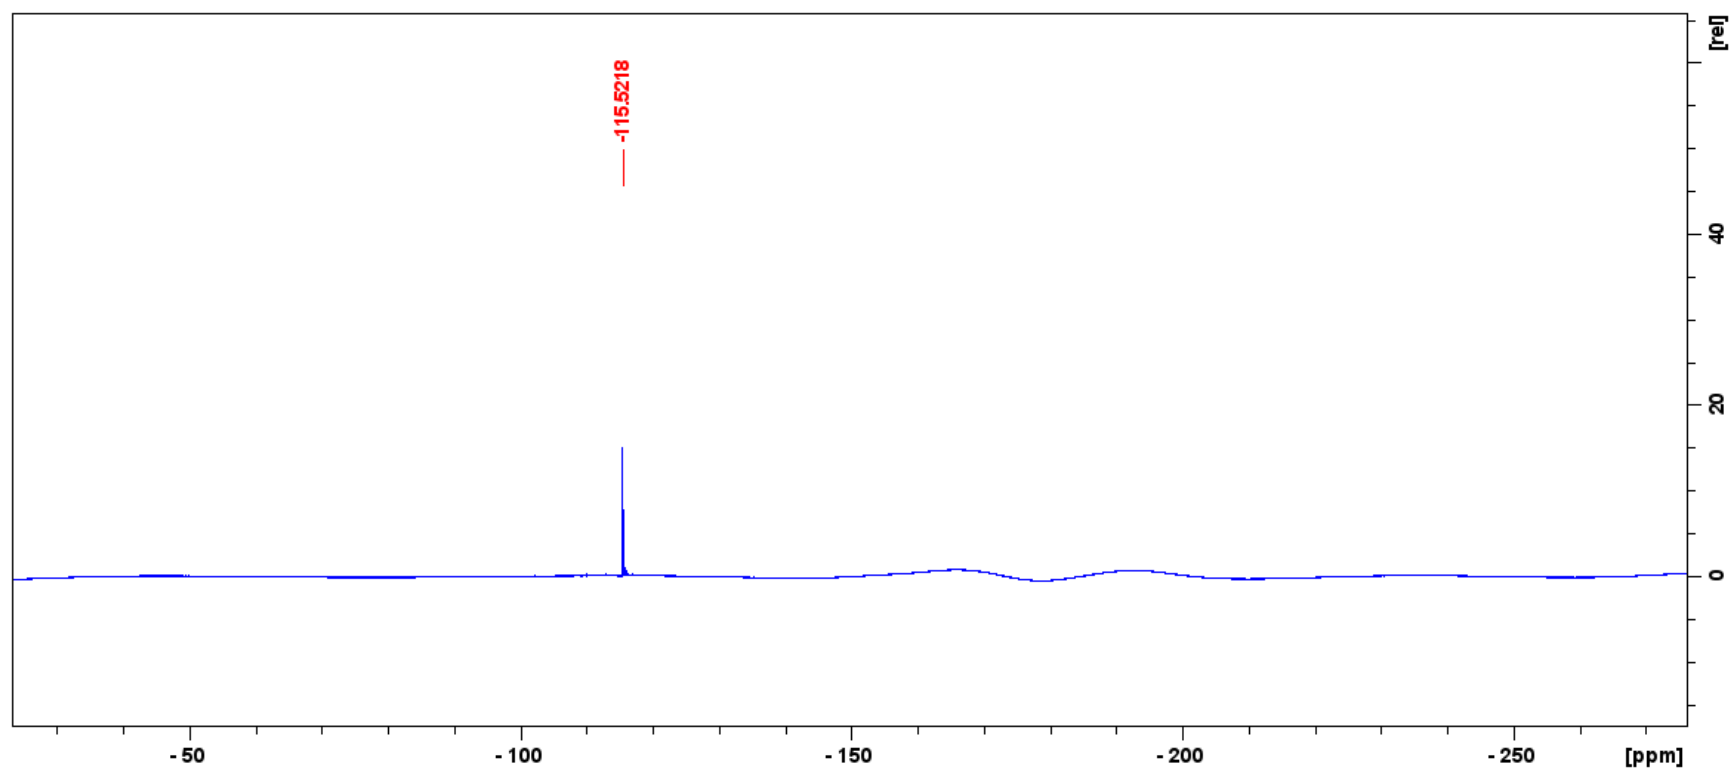

$^1\text{H}$ -NMR of compound (4*R*,4*aS*,6*aR*,8*R*,9*R*,11*aR*,11*bS*)-methyl 9-(hydroxymethyl)-8-((4-methoxybenzyl)amino)-4,11*b*-dimethyltetradecahydro-6*a*,9-methanocyclohepta[*a*]naphthalene-4-carboxylate (**10**)

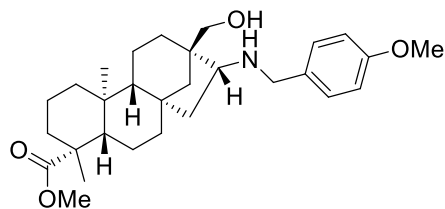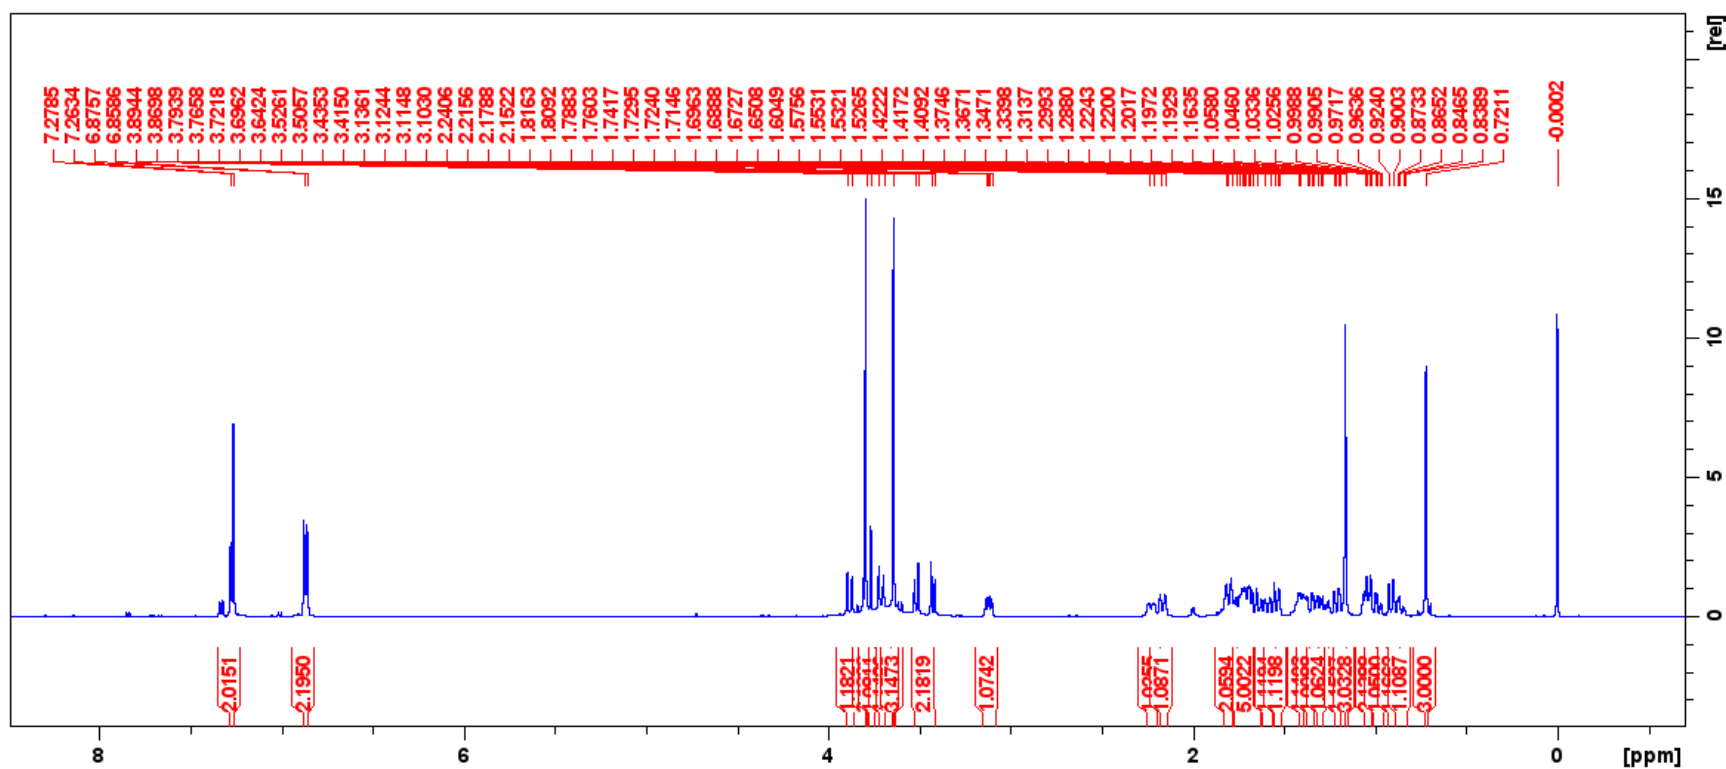

$^{13}\text{C}$ -NMR of compound (4*R*,4*aS*,6*aR*,8*R*,9*R*,11*aR*,11*bS*)-methyl 9-(hydroxymethyl)-8-((4-methoxybenzyl)amino)-4,11*b*-dimethyltetradecahydro-6*a*,9-methanocyclohepta[*a*]naphthalene-4-carboxylate (**10**)

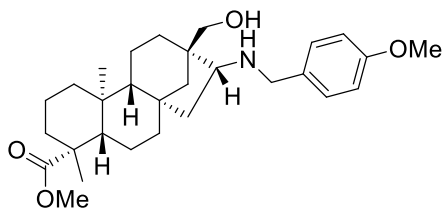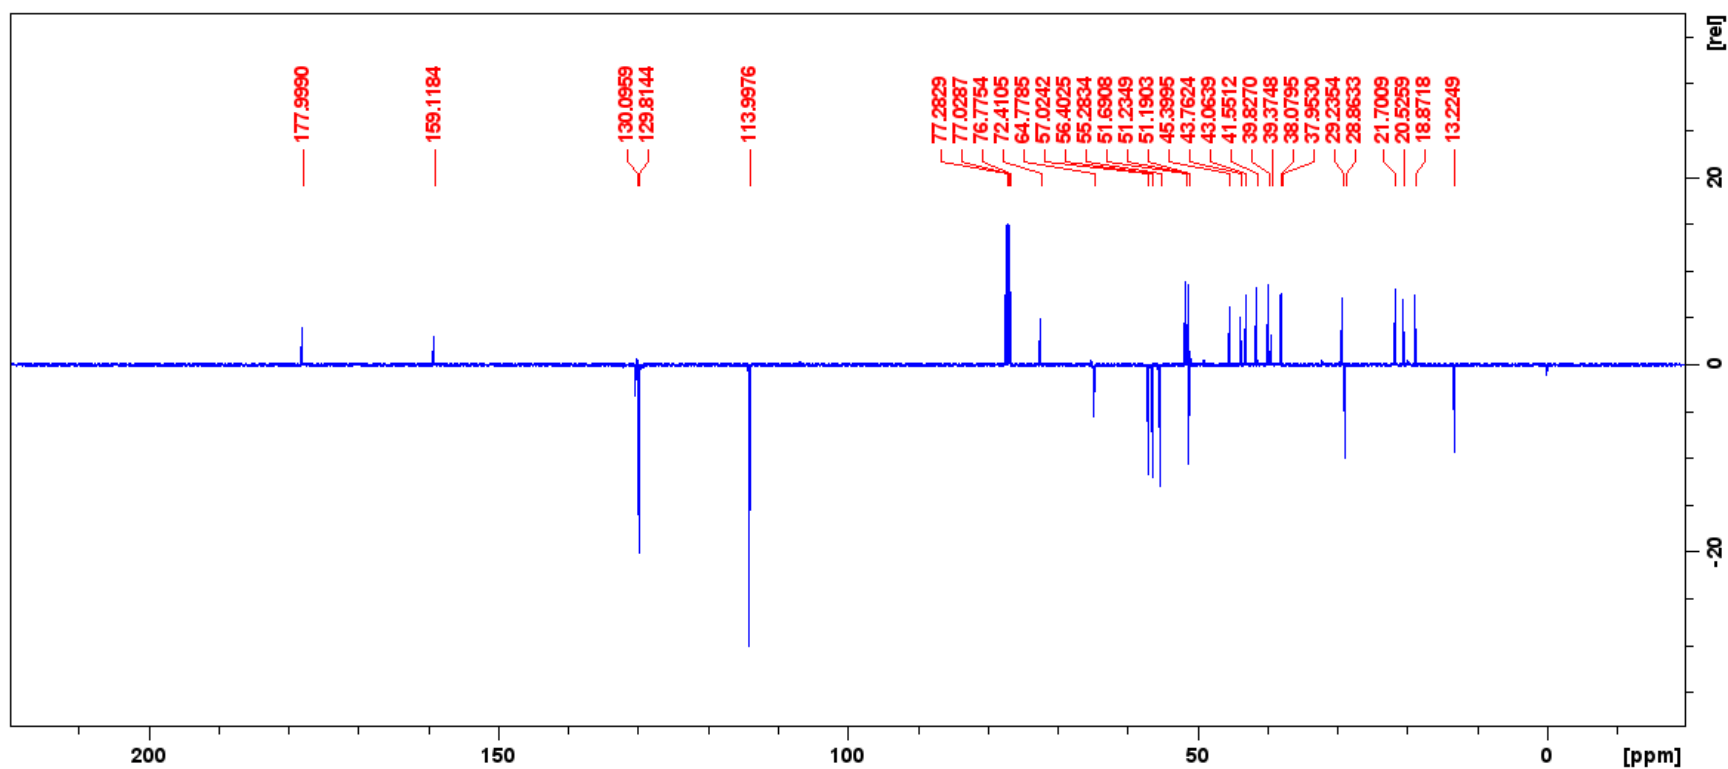

COSY of compound (4*R*,4*aS*,6*aR*,8*R*,9*R*,11*aR*,11*bS*)-methyl 9-(hydroxymethyl)-8-((4-methoxybenzyl)amino)-4,11b-dimethyltetradecahydro-6*a*,9-methanocyclohepta[*a*]naphthalene-4-carboxylate (**10**)

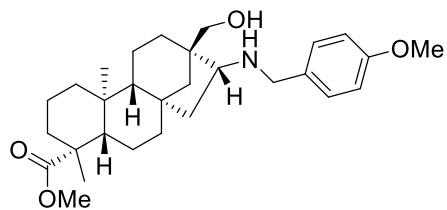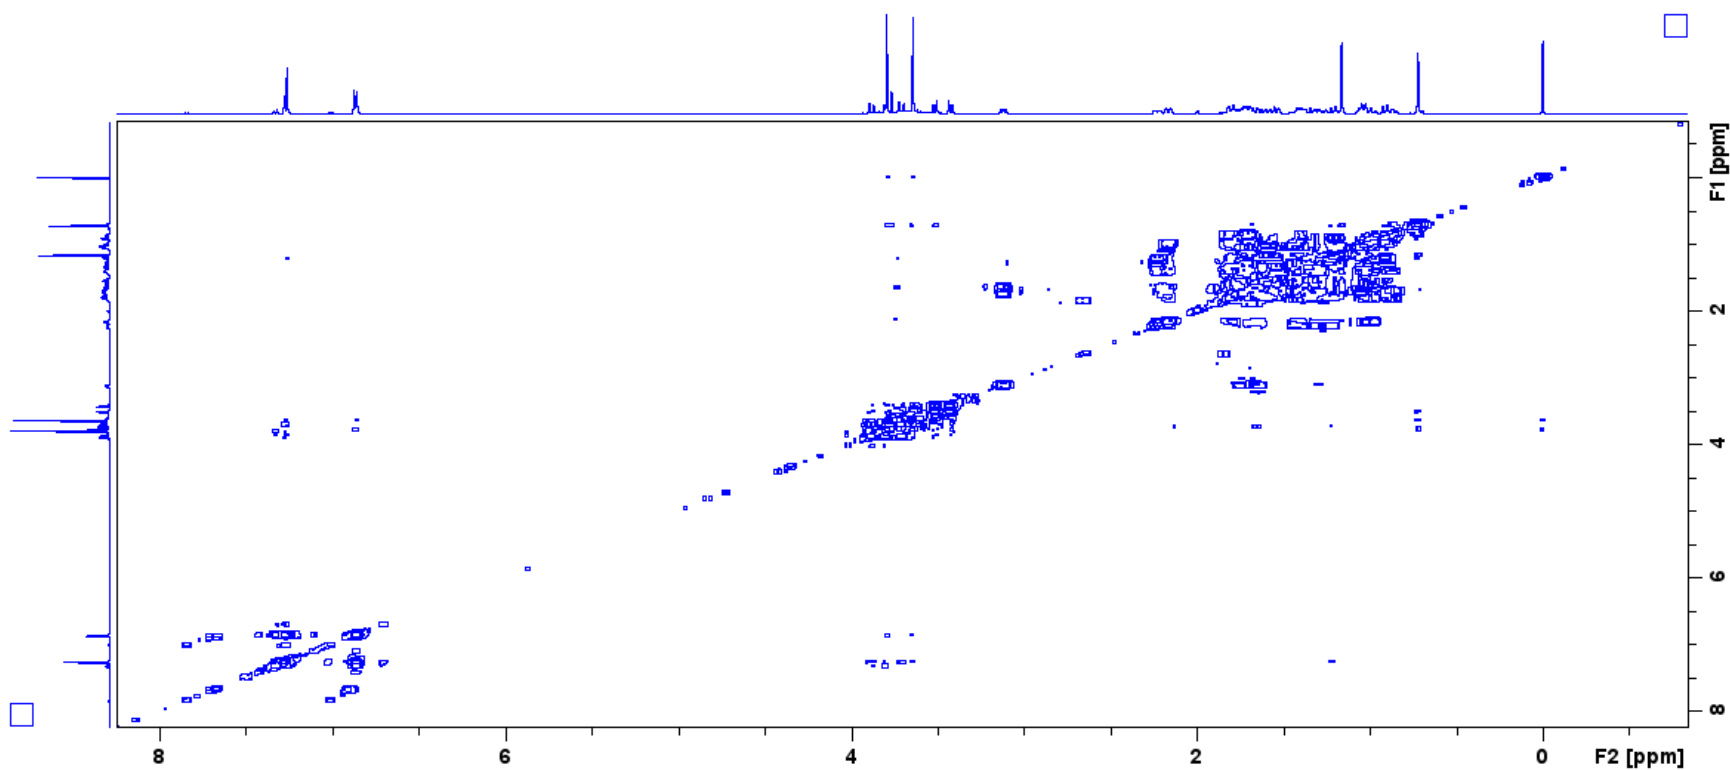



NOESY of compound (4*R*,4*aS*,6*aR*,8*R*,9*R*,11*aR*,11*bS*)-methyl 9-(hydroxymethyl)-8-((4-methoxybenzyl)amino)-4,11b-dimethyltetradecahydro-6*a*,9-methanocyclohepta[*a*]naphthalene-4-carboxylate (**10**)

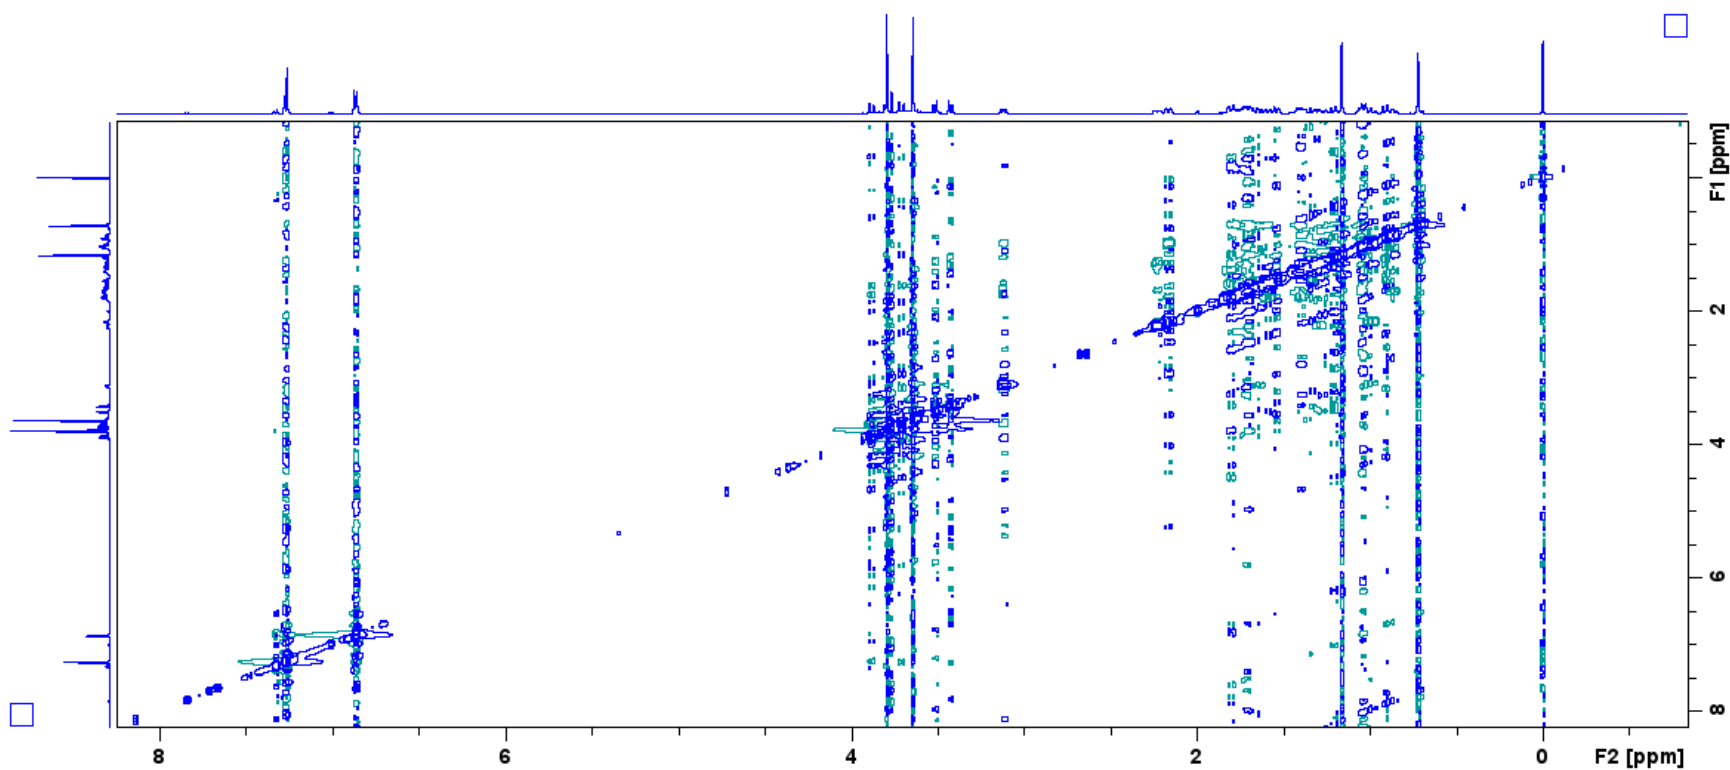

HSQC of compound (4*R*,4*aS*,6*aR*,8*R*,9*R*,11*aR*,11*bS*)-methyl 9-(hydroxymethyl)-8-((4-methoxybenzyl)amino)-4,11b-dimethyltetradecahydro-6*a*,9-methanocyclohepta[*a*]naphthalene-4-carboxylate (**10**)

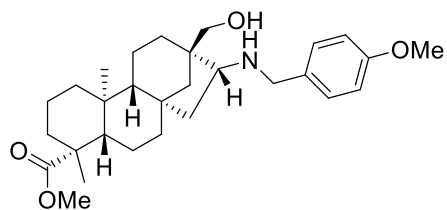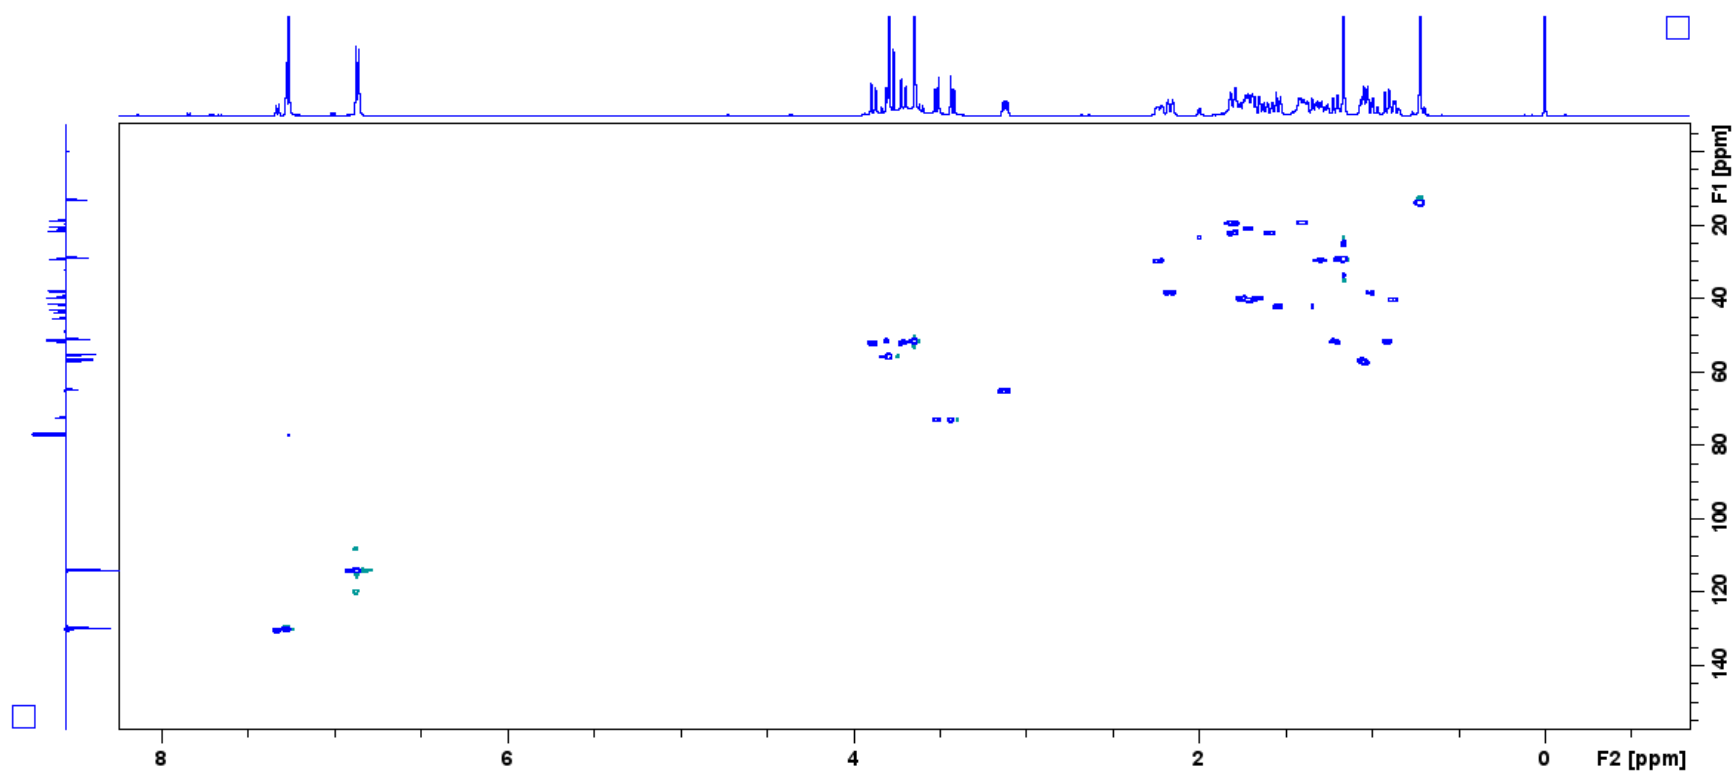

HMBC of compound (4*R*,4*aS*,6*aR*,8*R*,9*R*,11*aR*,11*bS*)-methyl 9-(hydroxymethyl)-8-((4-methoxybenzyl)amino)-4,11b-dimethyltetradecahydro-6*a*,9-methanocyclohepta[*a*]naphthalene-4-carboxylate (**10**)

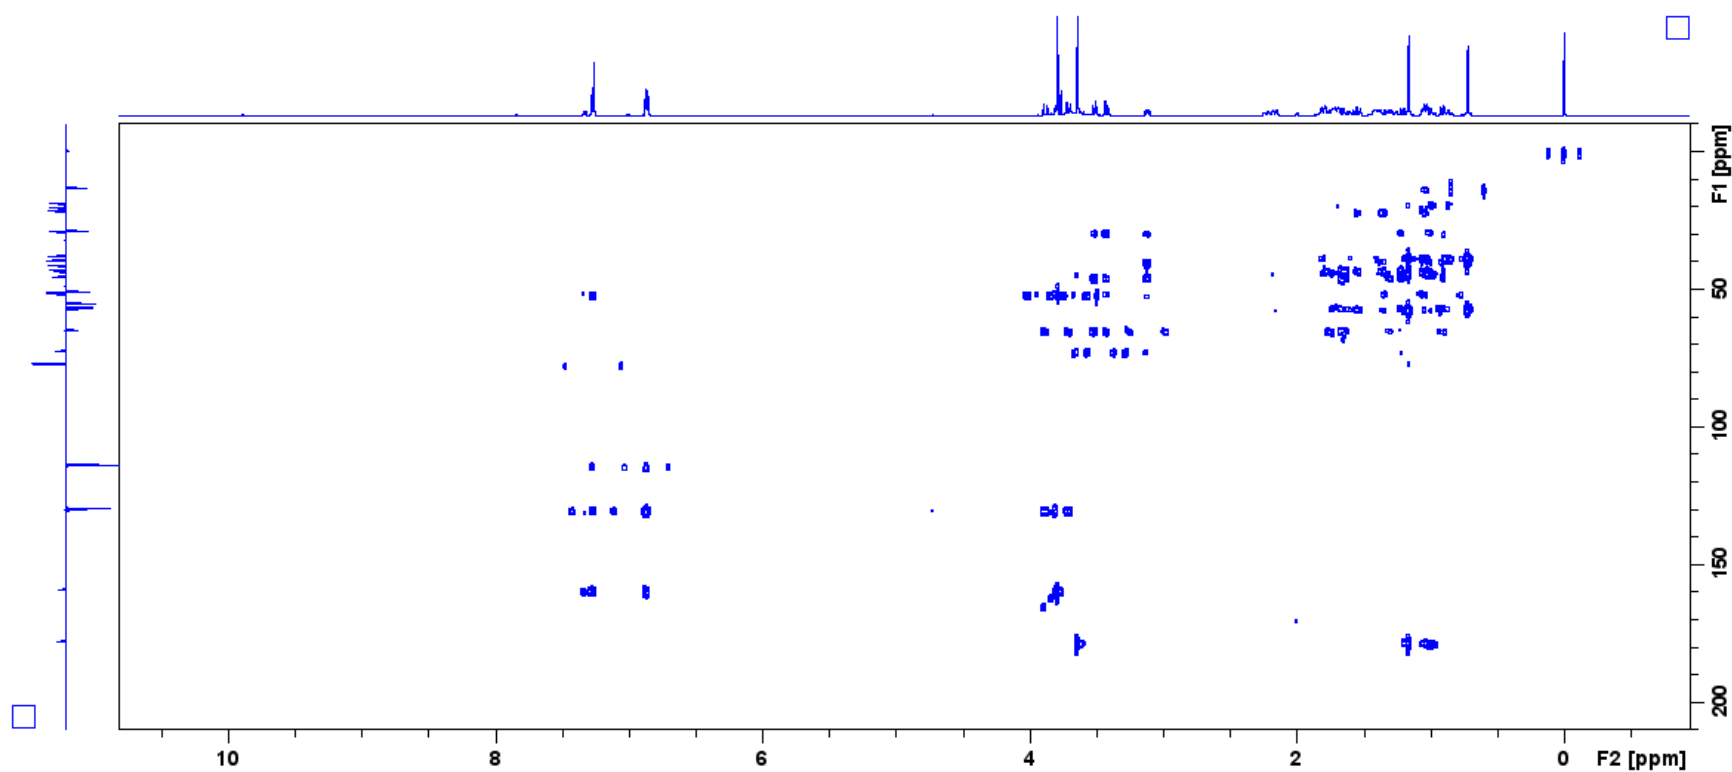

$^1\text{H}$ -NMR of compound (4*R*,4*aS*,6*aR*,8*R*,9*R*,11*aR*,11*bS*)-methyl 9-(hydroxymethyl)-4,11*b*-dimethyl-8-(((*S*)-1-phenylpropyl)amino)tetradecahydro-6*a*,9-methanocyclohepta[*a*]naphthalene-4-carboxylate (**11**)

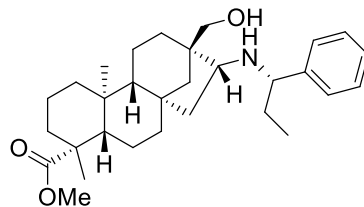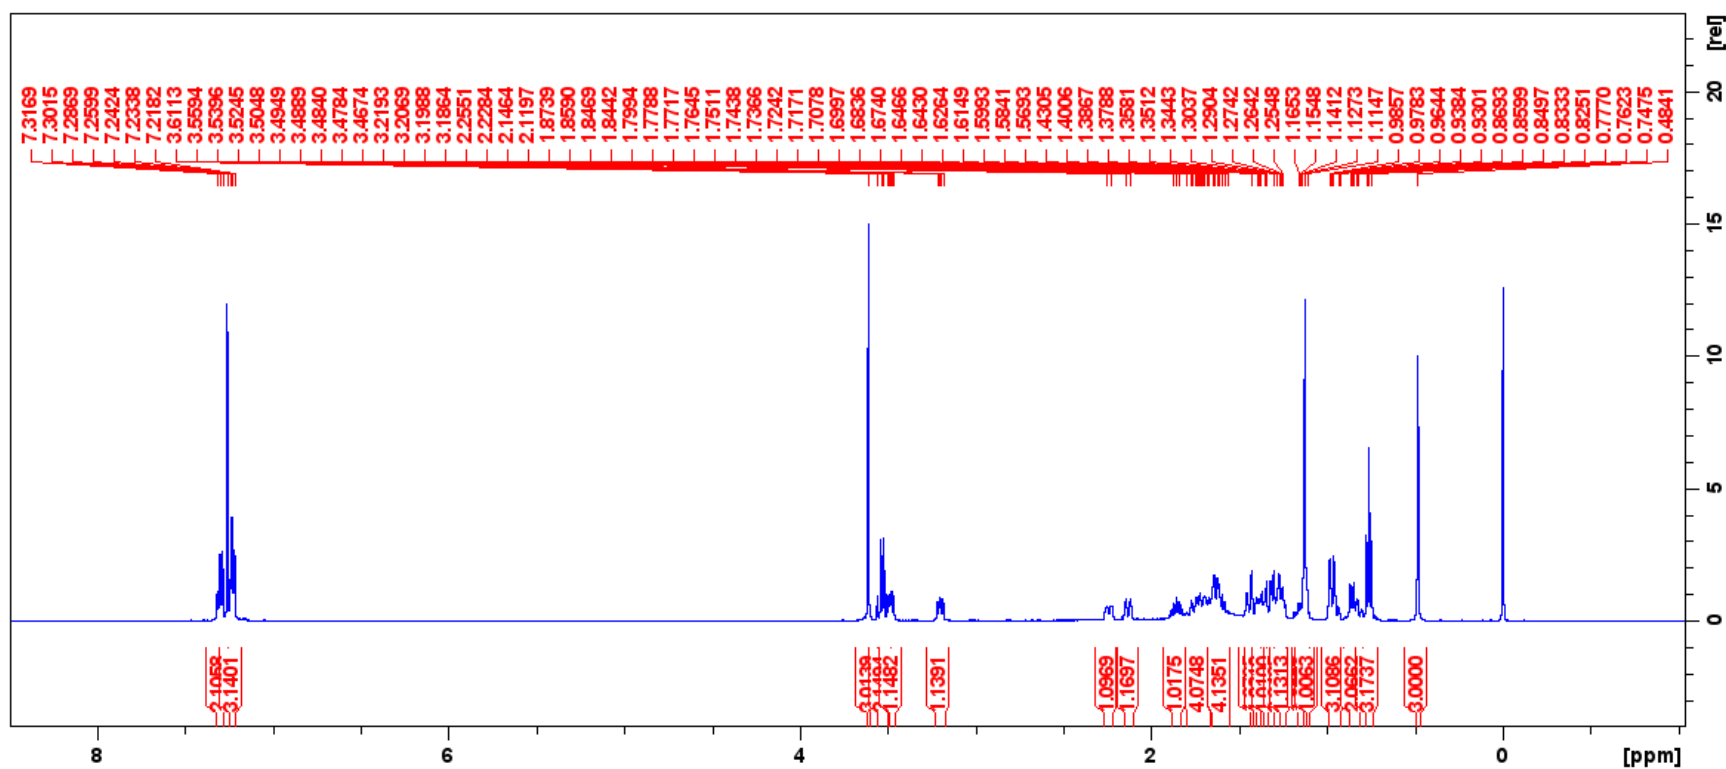

$^{13}\text{C}$ -NMR of compound (4*R*,4*aS*,6*aR*,8*R*,9*R*,11*aR*,11*bS*)-methyl 9-(hydroxymethyl)-4,11*b*-dimethyl-8-(((*S*)-1-phenylpropyl)amino)tetradecahydro-6*a*,9-methanocyclohepta[*a*]naphthalene-4-carboxylate (**11**)

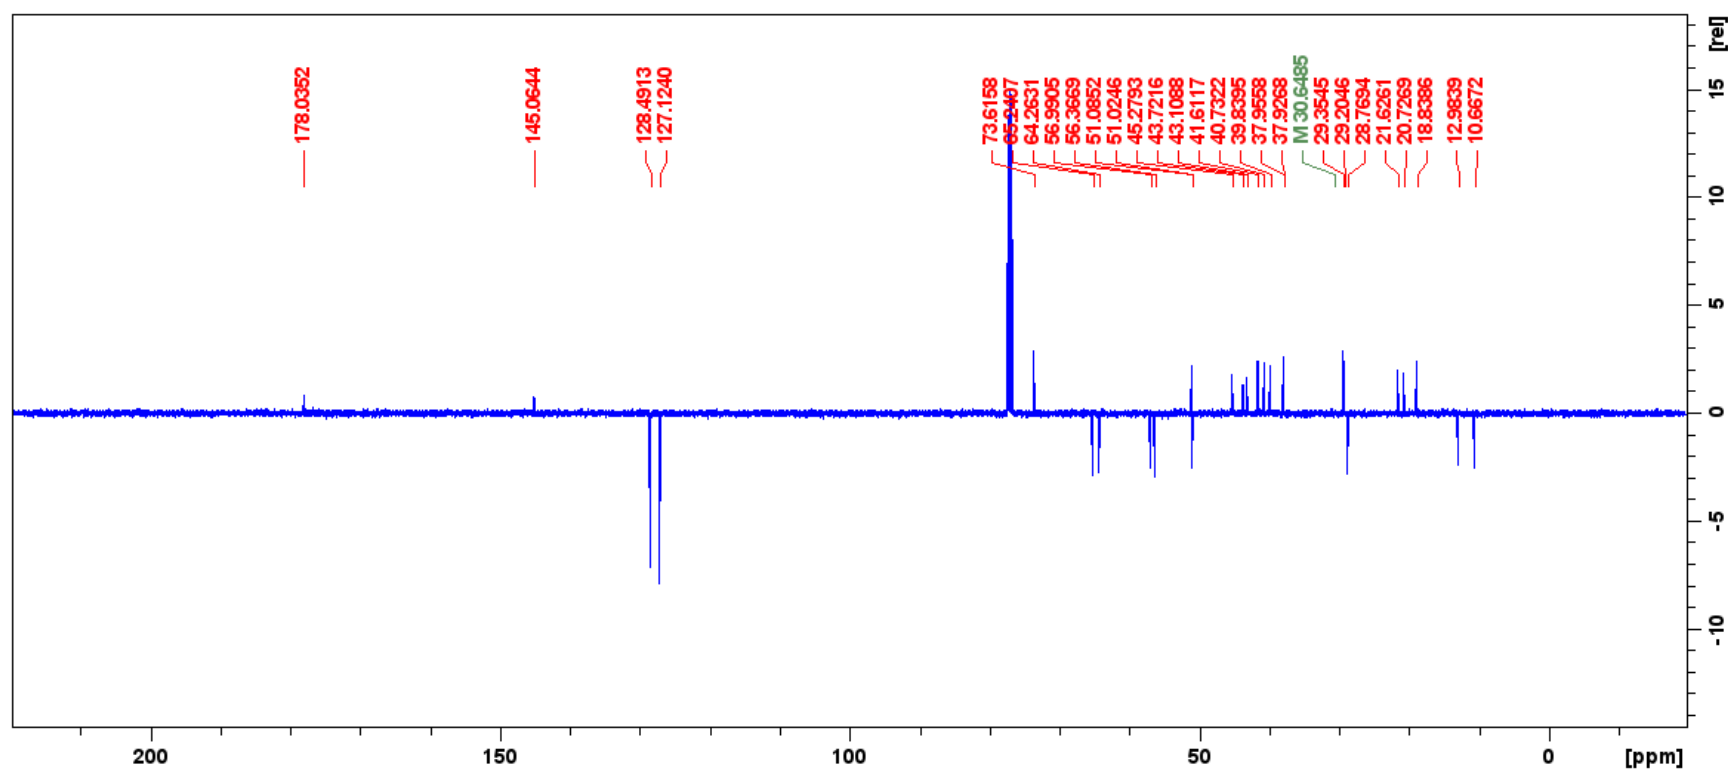

COSY of compound (4*R*,4*aS*,6*aR*,8*R*,9*R*,11*aR*,11*bS*)-methyl 9-(hydroxymethyl)-4,11*b*-dimethyl-8-(((*S*)-1-phenylpropyl)amino)tetradecahydro-6*a*,9-methanocyclohepta[*a*]naphthalene-4-carboxylate (**11**)

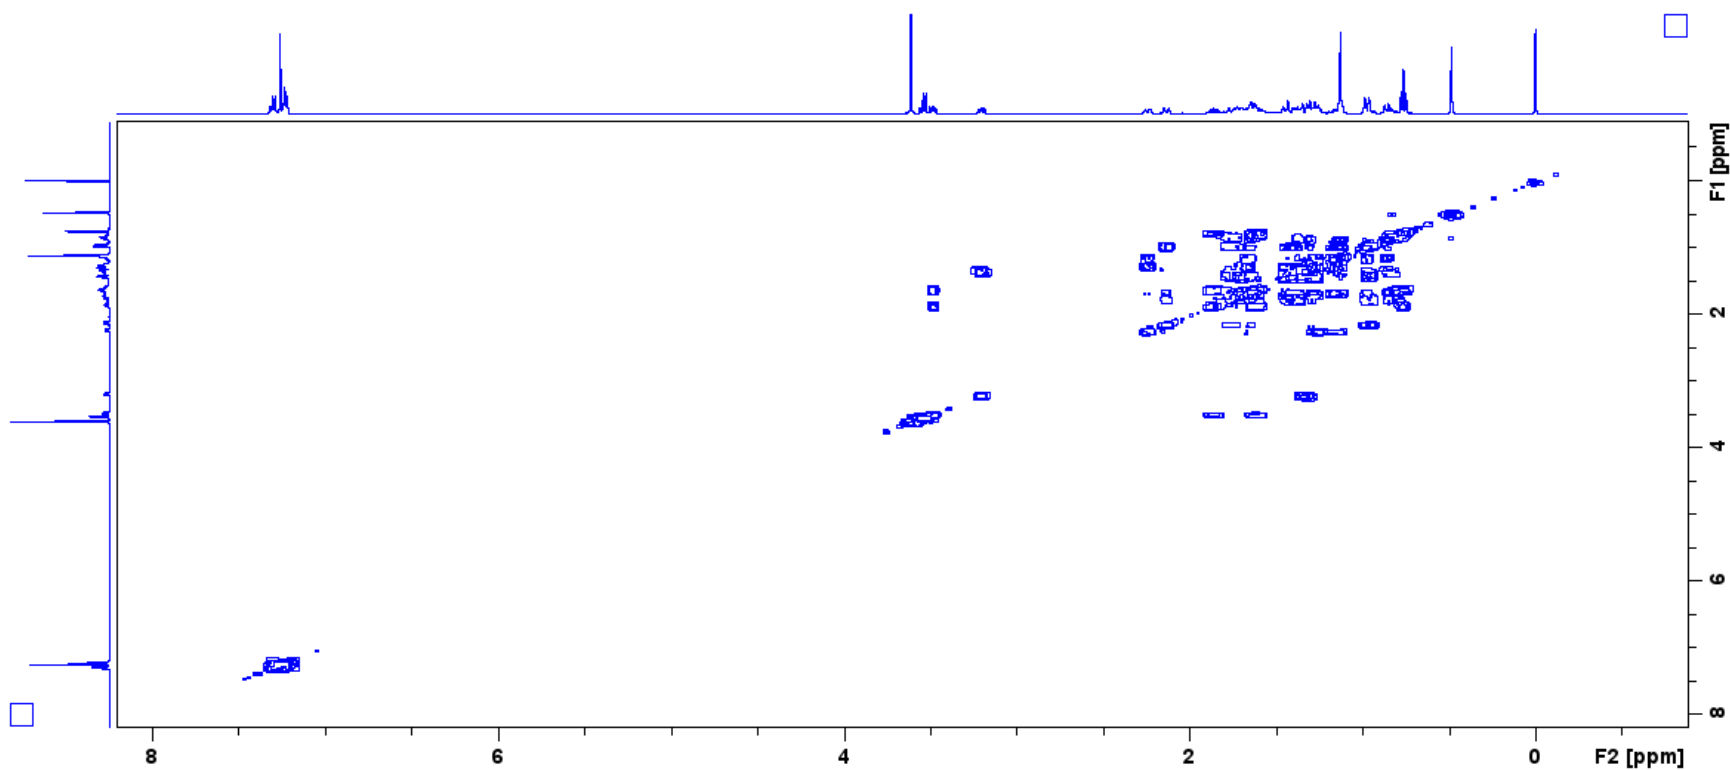

NOESY of compound (4*R*,4*aS*,6*aR*,8*R*,9*R*,11*aR*,11*bS*)-methyl 9-(hydroxymethyl)-4,11*b*-dimethyl-8-(((*S*)-1-phenylpropyl)amino)tetradecahydro-6*a*,9-methanocyclohepta[*a*]naphthalene-4-carboxylate (**11**)

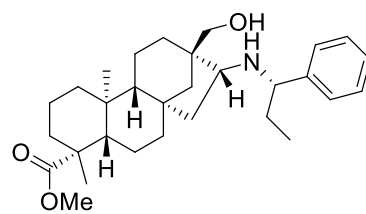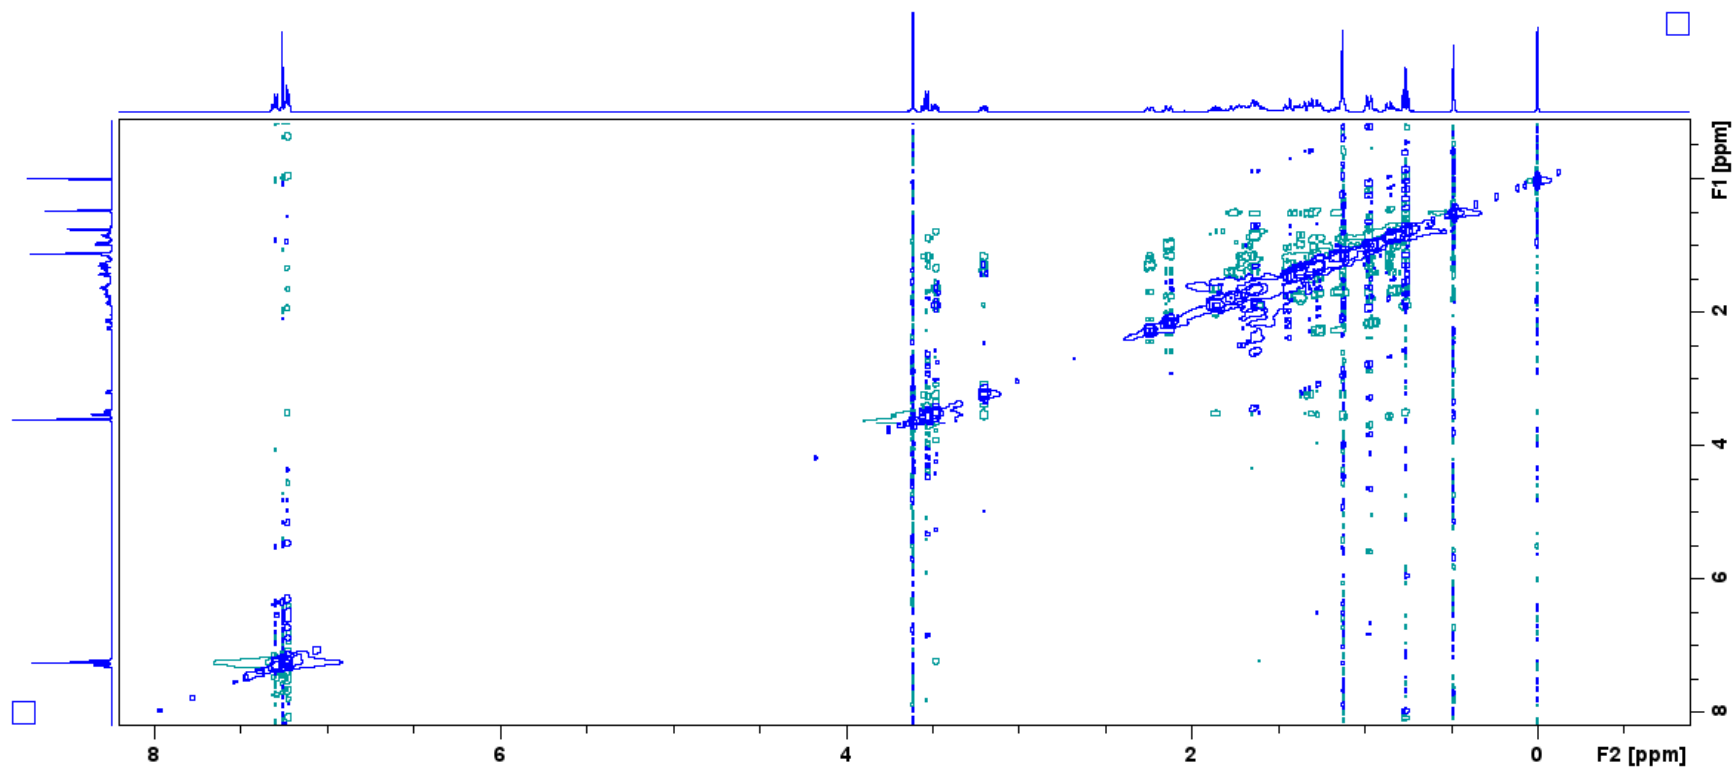

HSQC of compound (4*R*,4*aS*,6*aR*,8*R*,9*R*,11*aR*,11*bS*)-methyl 9-(hydroxymethyl)-4,11*b*-dimethyl-8-(((*S*)-1-phenylpropyl)amino)tetradecahydro-6*a*,9-methanocyclohepta[*a*]naphthalene-4-carboxylate (**11**)

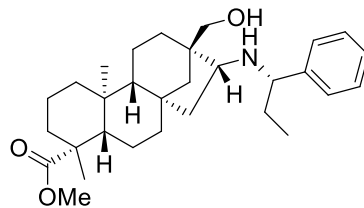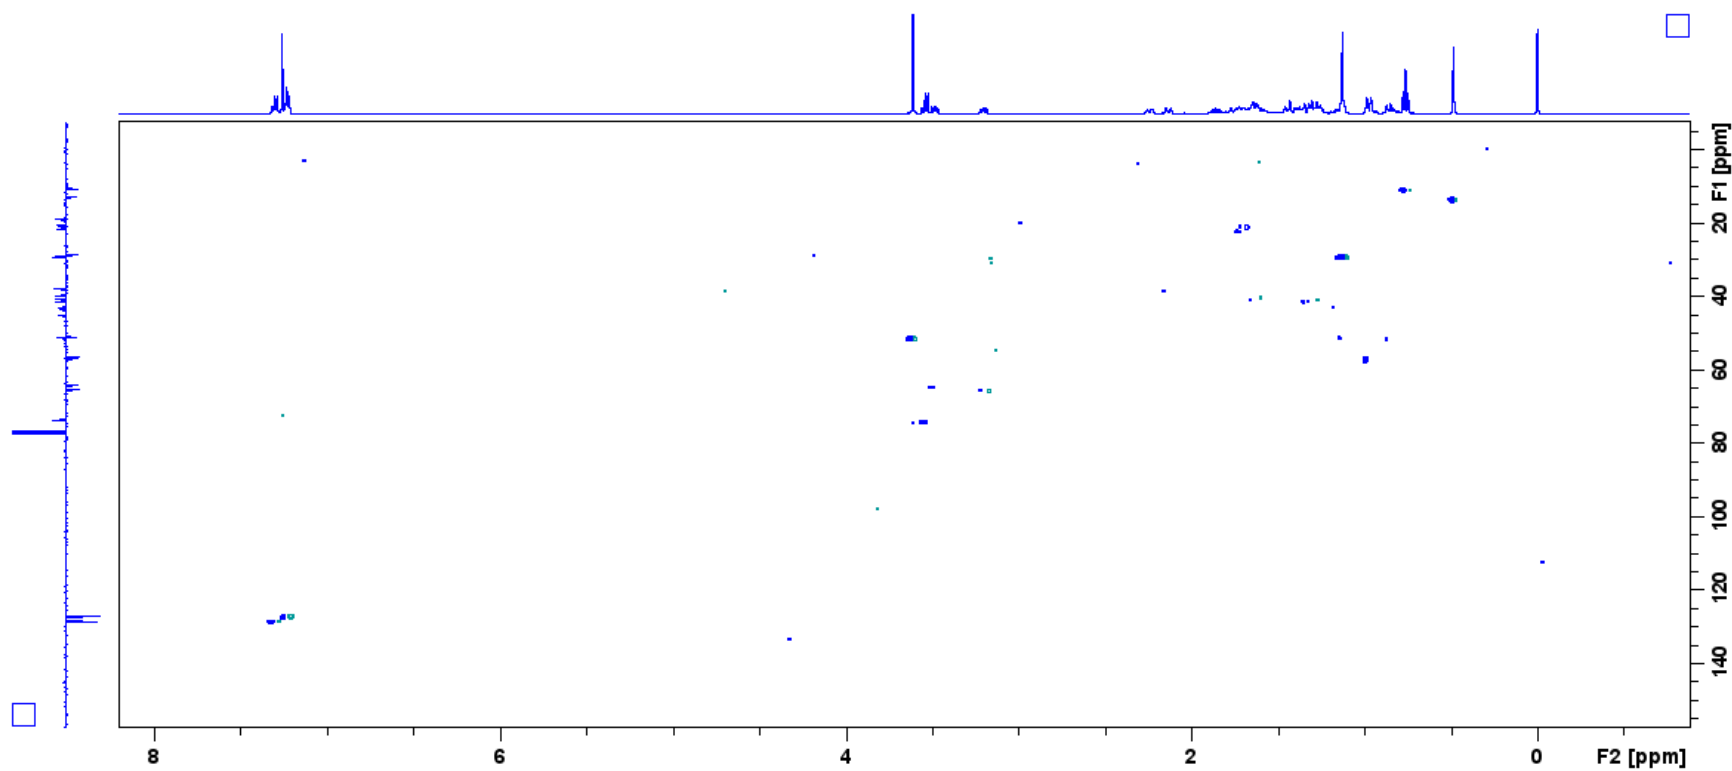



HMBC of compound (4*R*,4*aS*,6*aR*,8*R*,9*R*,11*aR*,11*bS*)-methyl 9-(hydroxymethyl)-4,11*b*-dimethyl-8-(((*S*)-1-phenylpropyl)amino)tetradecahydro-6*a*,9-methanocyclohepta[*a*]naphthalene-4-carboxylate (**11**)

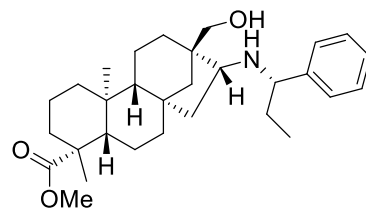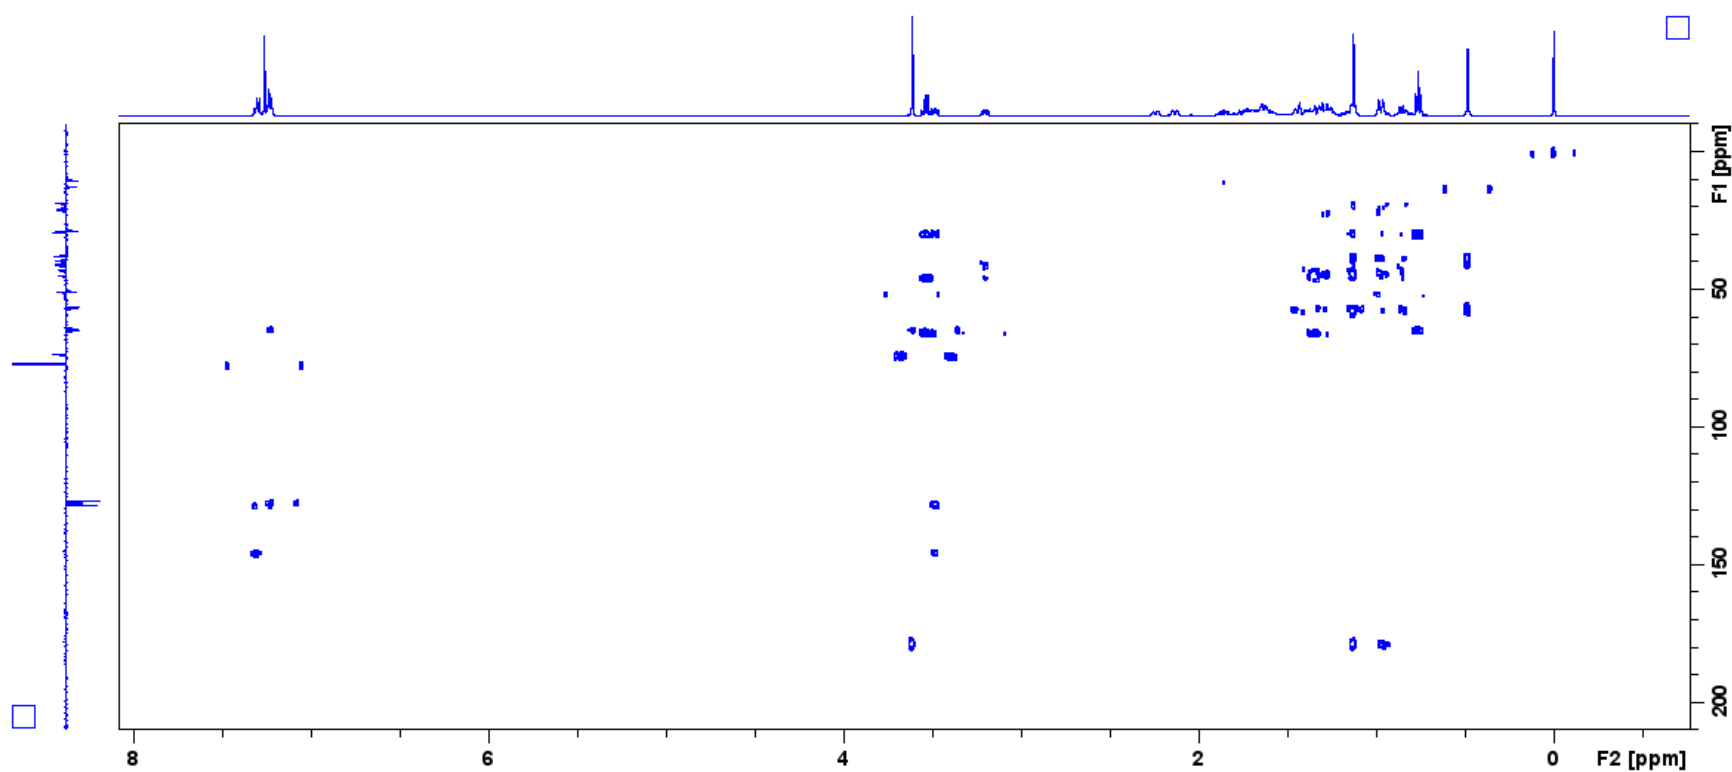

$^1\text{H}$ -NMR of compound (4*R*,4*aS*,6*aR*,8*R*,9*R*,11*aR*,11*bS*)-methyl 9-(hydroxymethyl)-4,11*b*-dimethyl-8-(((*R*)-1-phenylpropyl)amino)tetradecahydro-6*a*,9-methanocyclohepta[*a*]naphthalene-4-carboxylate (**12**)

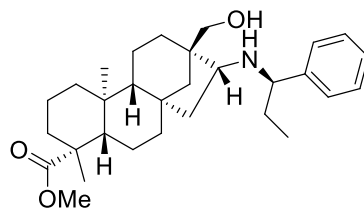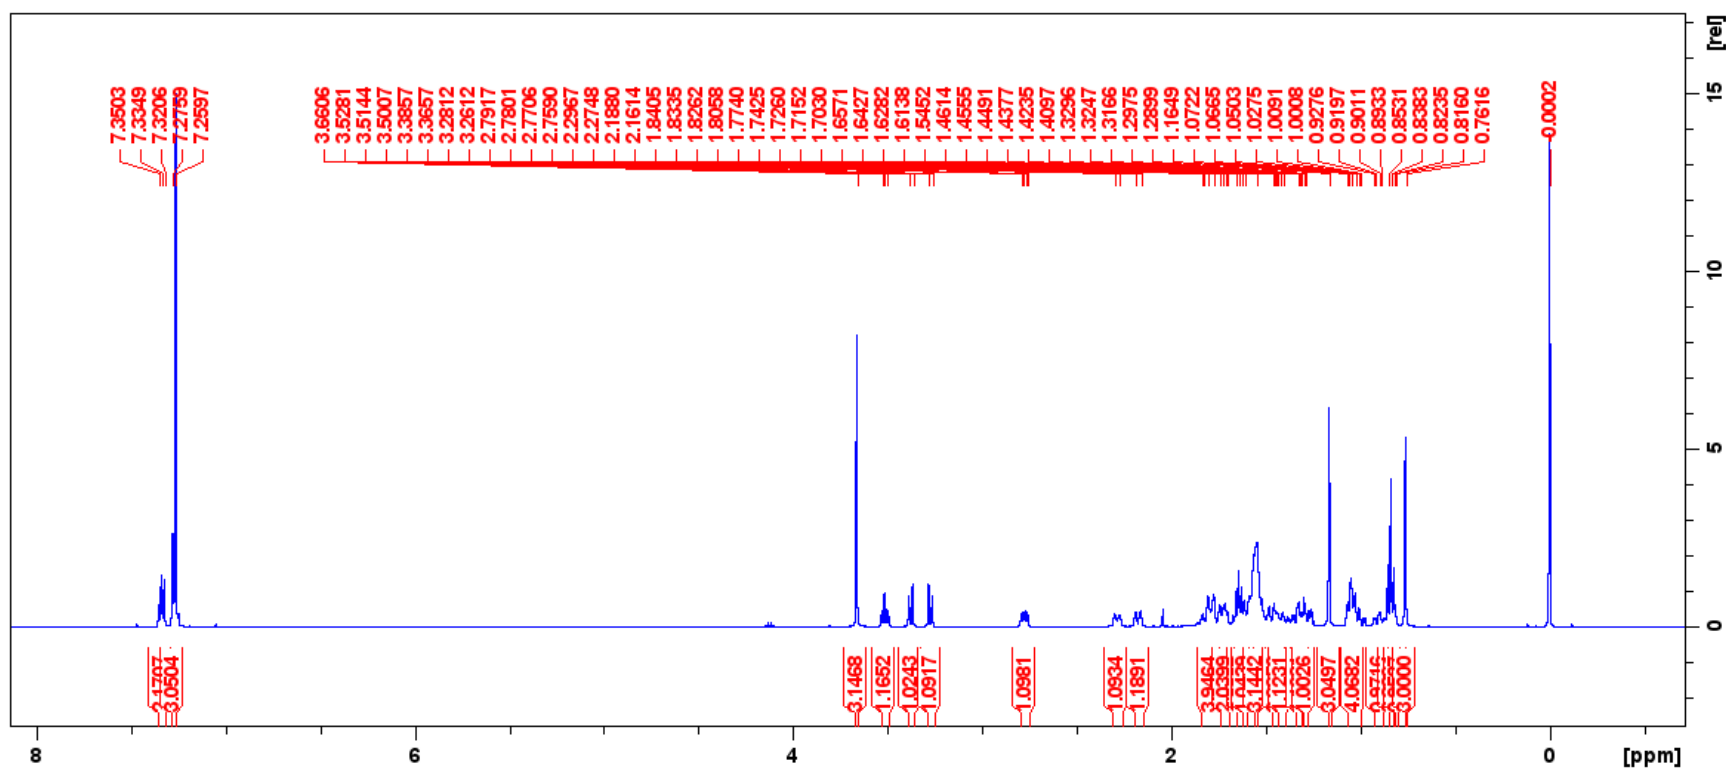

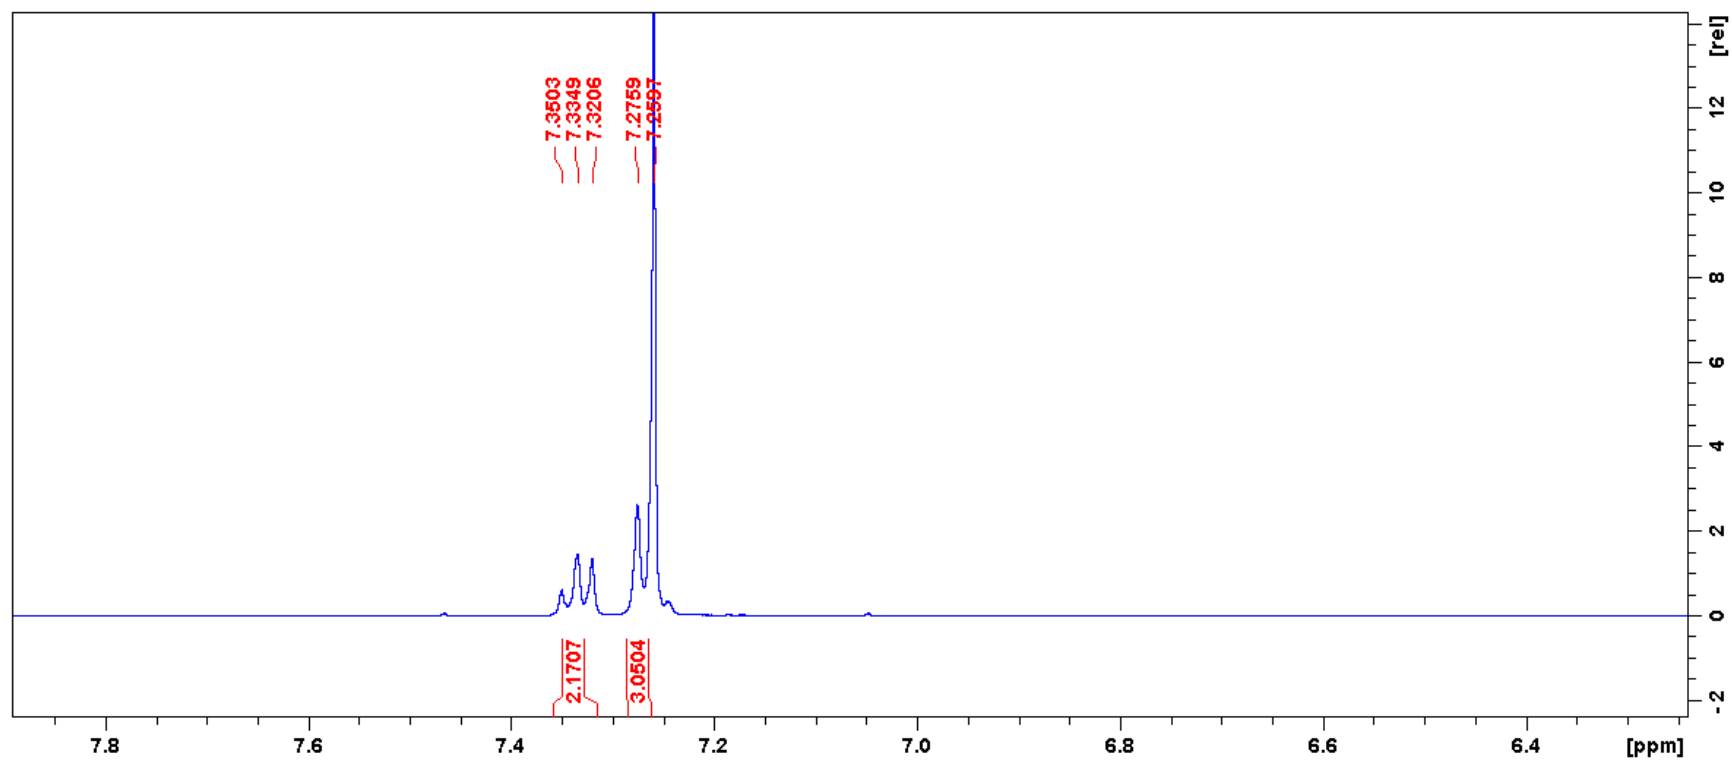

$^{13}\text{C}$ -NMR of compound (4*R*,4*aS*,6*aR*,8*R*,9*R*,11*aR*,11*bS*)-methyl 9-(hydroxymethyl)-4,11*b*-dimethyl-8-(((*R*)-1-phenylpropyl)amino)tetradecahydro-6*a*,9-methanocyclohepta[*a*]naphthalene-4-carboxylate (**12**)

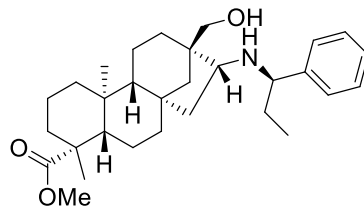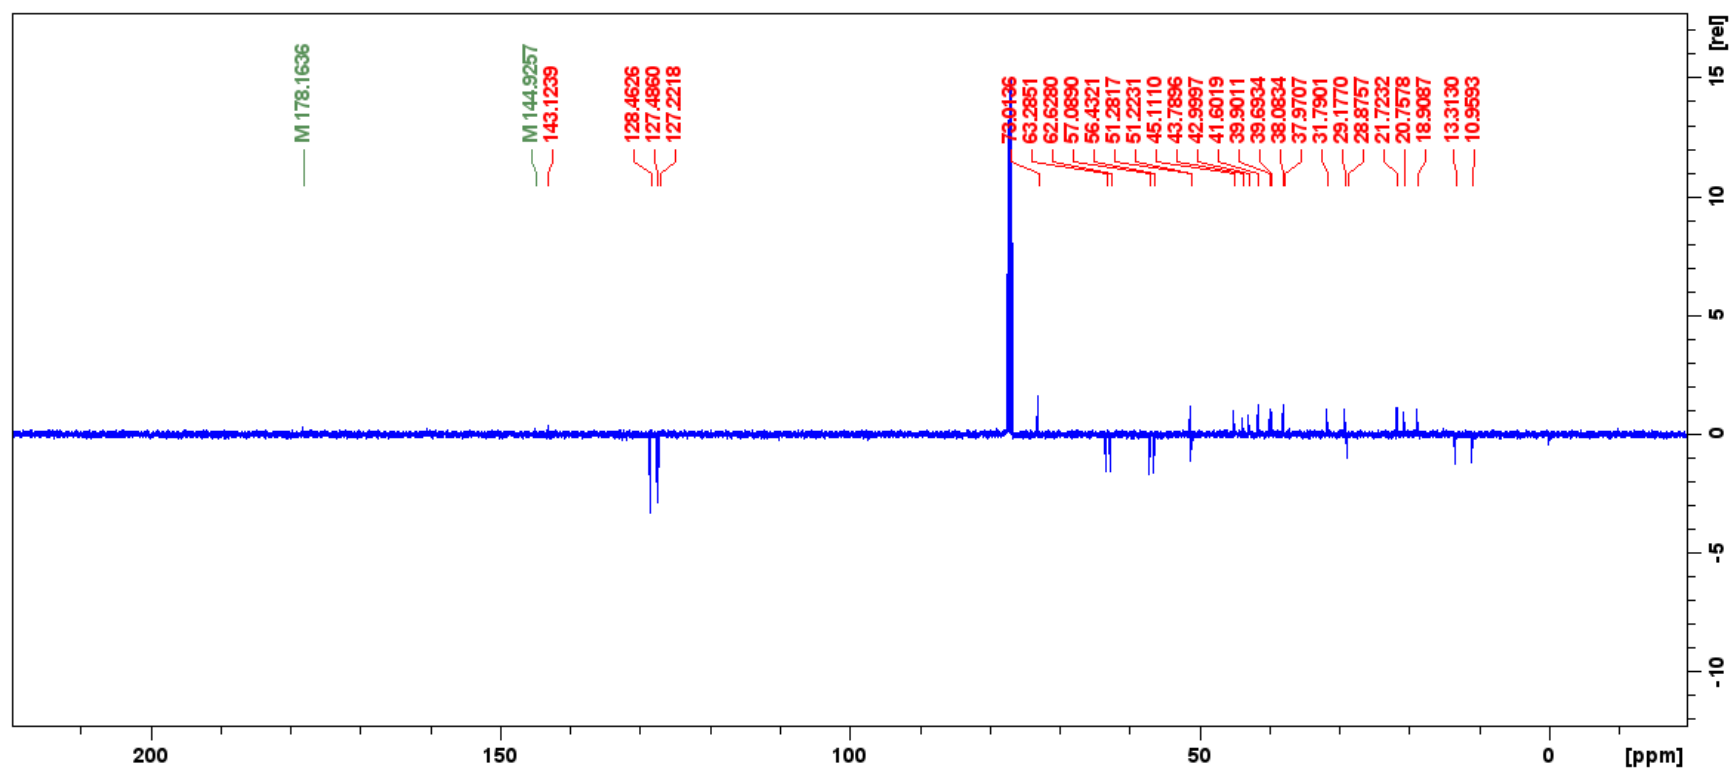

COSY of compound (4*R*,4*aS*,6*aR*,8*R*,9*R*,11*aR*,11*bS*)-methyl 9-(hydroxymethyl)-4,11*b*-dimethyl-8-(((*R*)-1-phenylpropyl)amino)tetradecahydro-6*a*,9-methanocyclohepta[*a*]naphthalene-4-carboxylate (**12**)

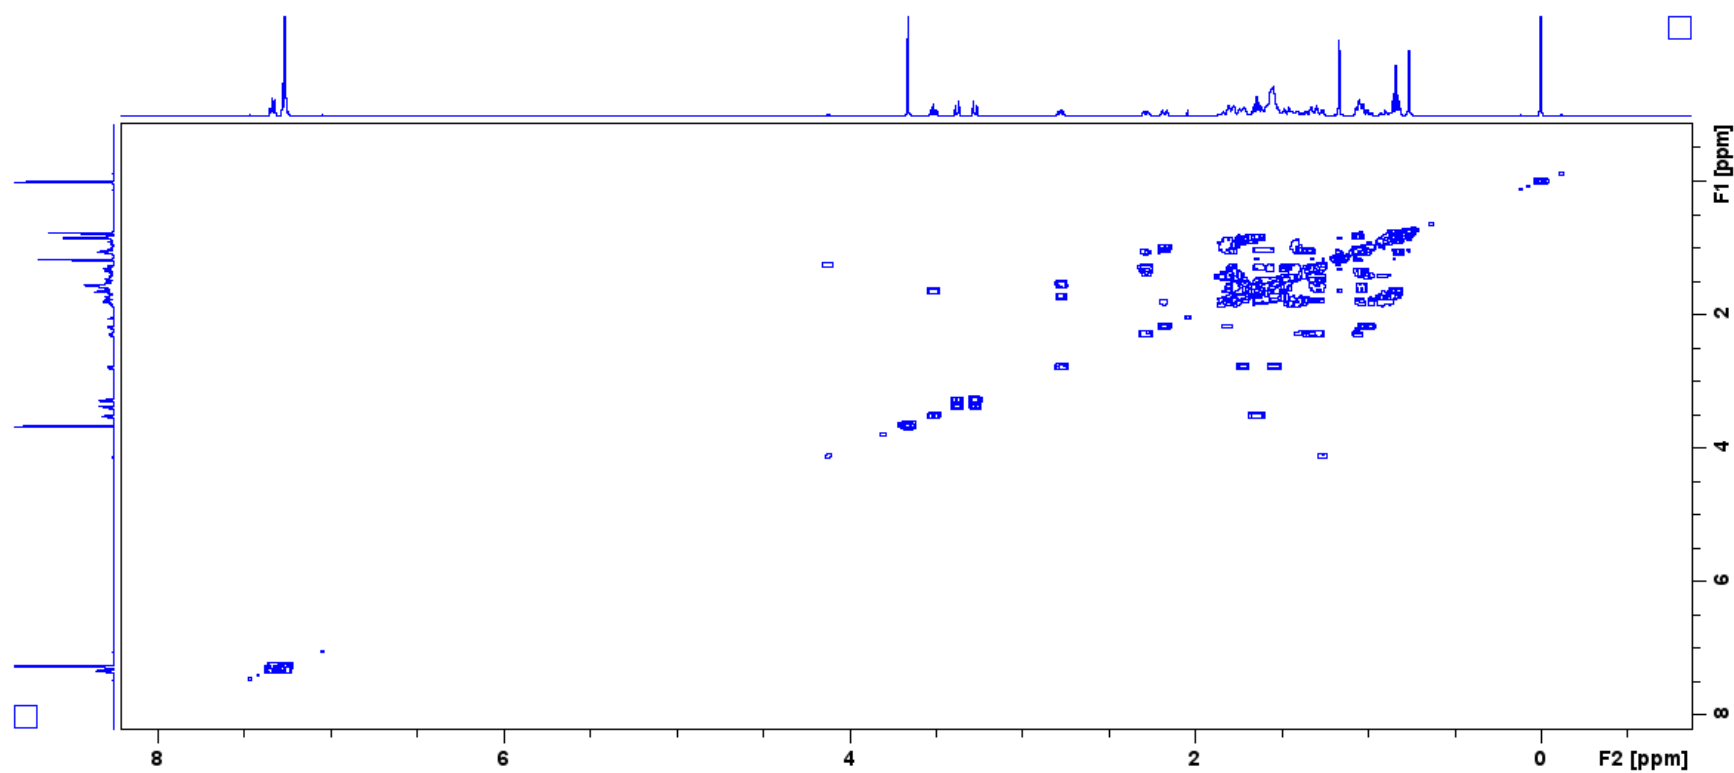

NOESY of compound (4*R*,4*aS*,6*aR*,8*R*,9*R*,11*aR*,11*bS*)-methyl 9-(hydroxymethyl)-4,11*b*-dimethyl-8-(((*R*)-1-phenylpropyl)amino)tetradecahydro-6*a*,9-methanocyclohepta[*a*]naphthalene-4-carboxylate (**12**)

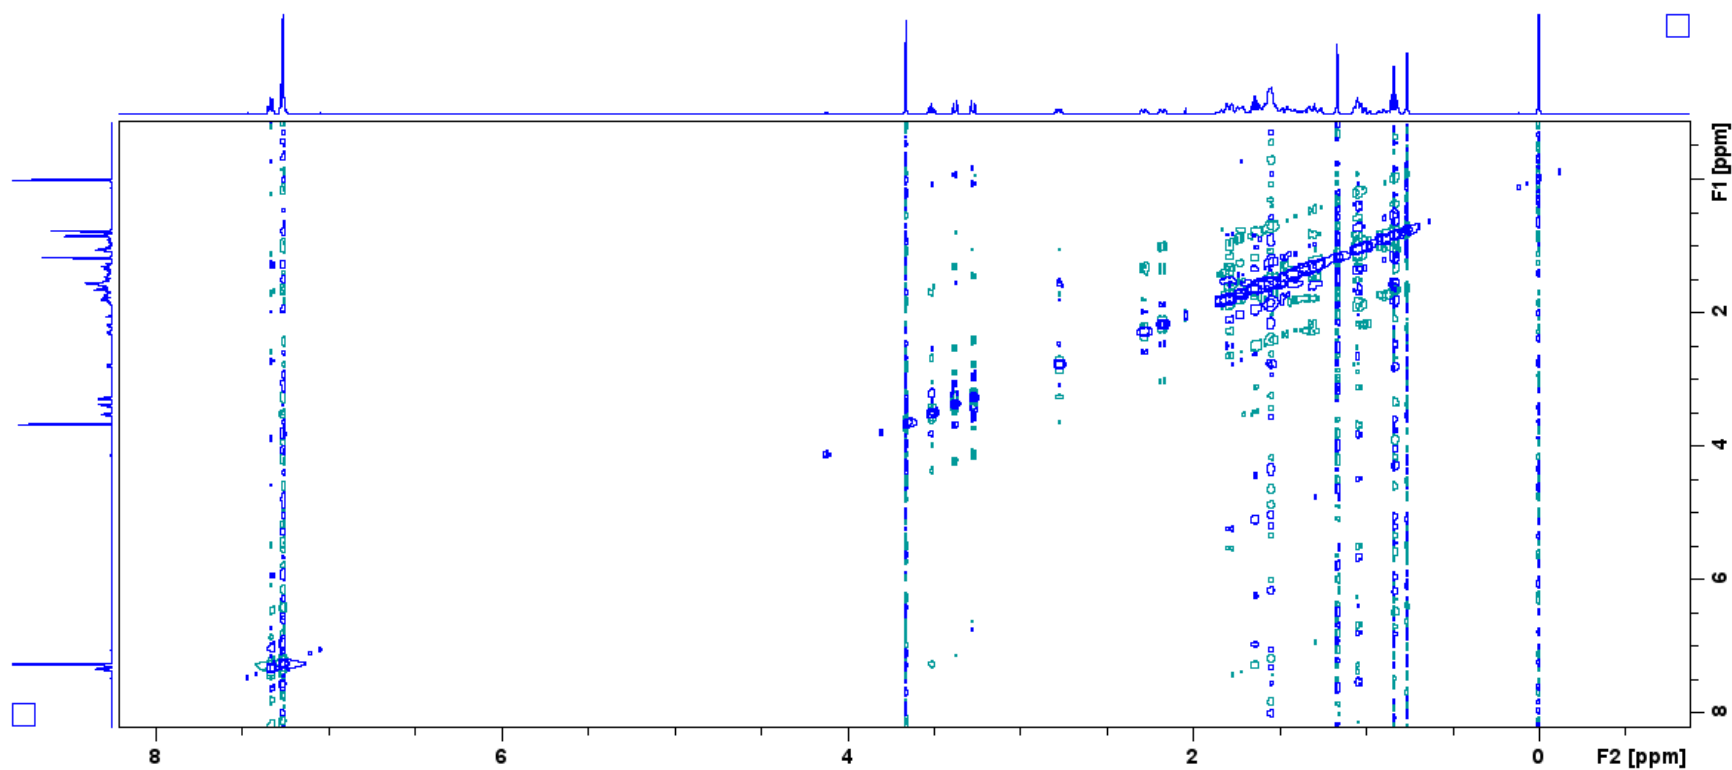

HSQC of compound (4*R*,4*aS*,6*aR*,8*R*,9*R*,11*aR*,11*bS*)-methyl 9-(hydroxymethyl)-4,11*b*-dimethyl-8-(((*R*)-1-phenylpropyl)amino)tetradecahydro-6*a*,9-methanocyclohepta[*a*]naphthalene-4-carboxylate (**12**)

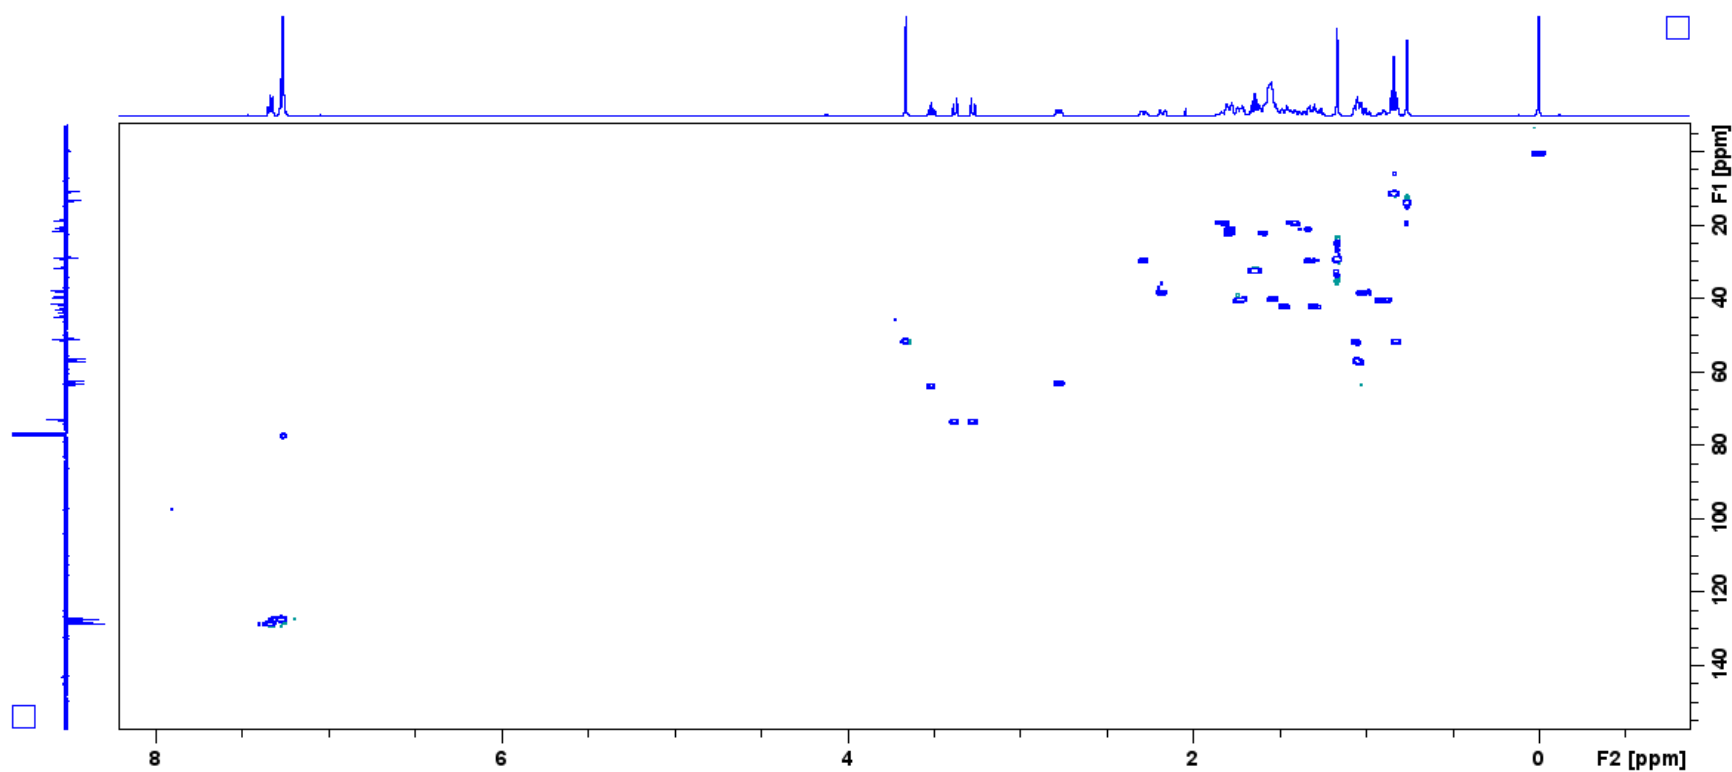

HMBC of compound (4*R*,4*aS*,6*aR*,8*R*,9*R*,11*aR*,11*bS*)-methyl 9-(hydroxymethyl)-4,11*b*-dimethyl-8-(((*R*)-1-phenylpropyl)amino)tetradecahydro-6*a*,9-methanocyclohepta[*a*]naphthalene-4-carboxylate (**12**)

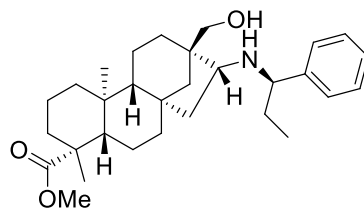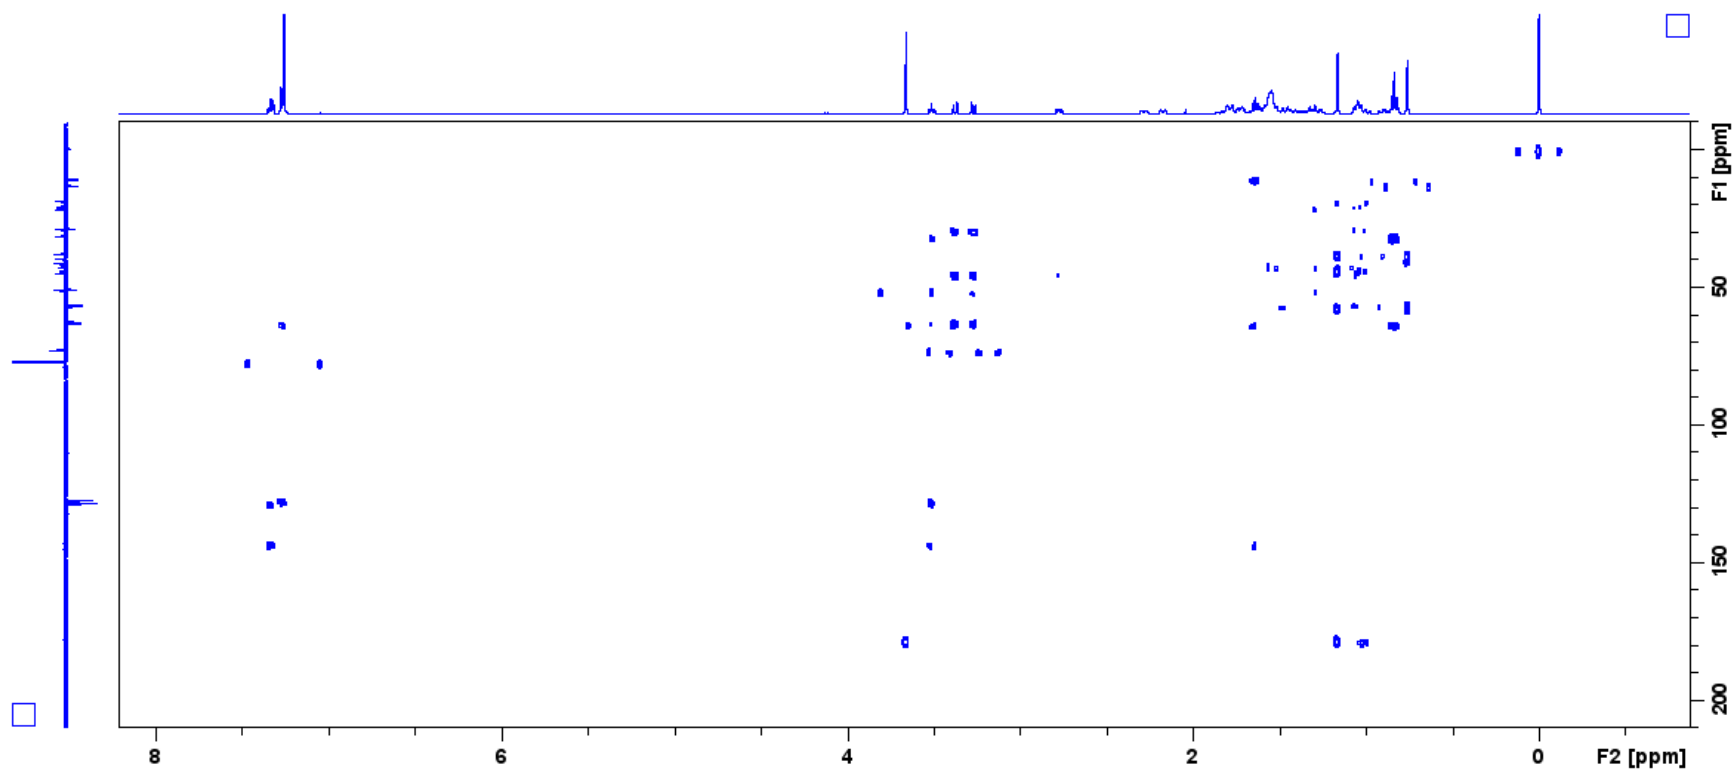



$^1\text{H}$ -NMR of compound (4*R*,4*aS*,6*aR*,8*R*,9*R*,11*aR*,11*bS*)-methyl 9-(hydroxymethyl)-4,11*b*-dimethyl-8-(((*R*)-1-(naphthalen-1-yl)ethyl)amino)tetradecahydro-6*a*,9-methanocyclohepta[*a*]naphthalene-4-carboxylate (**13**)

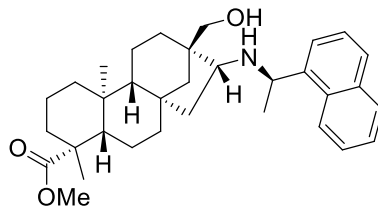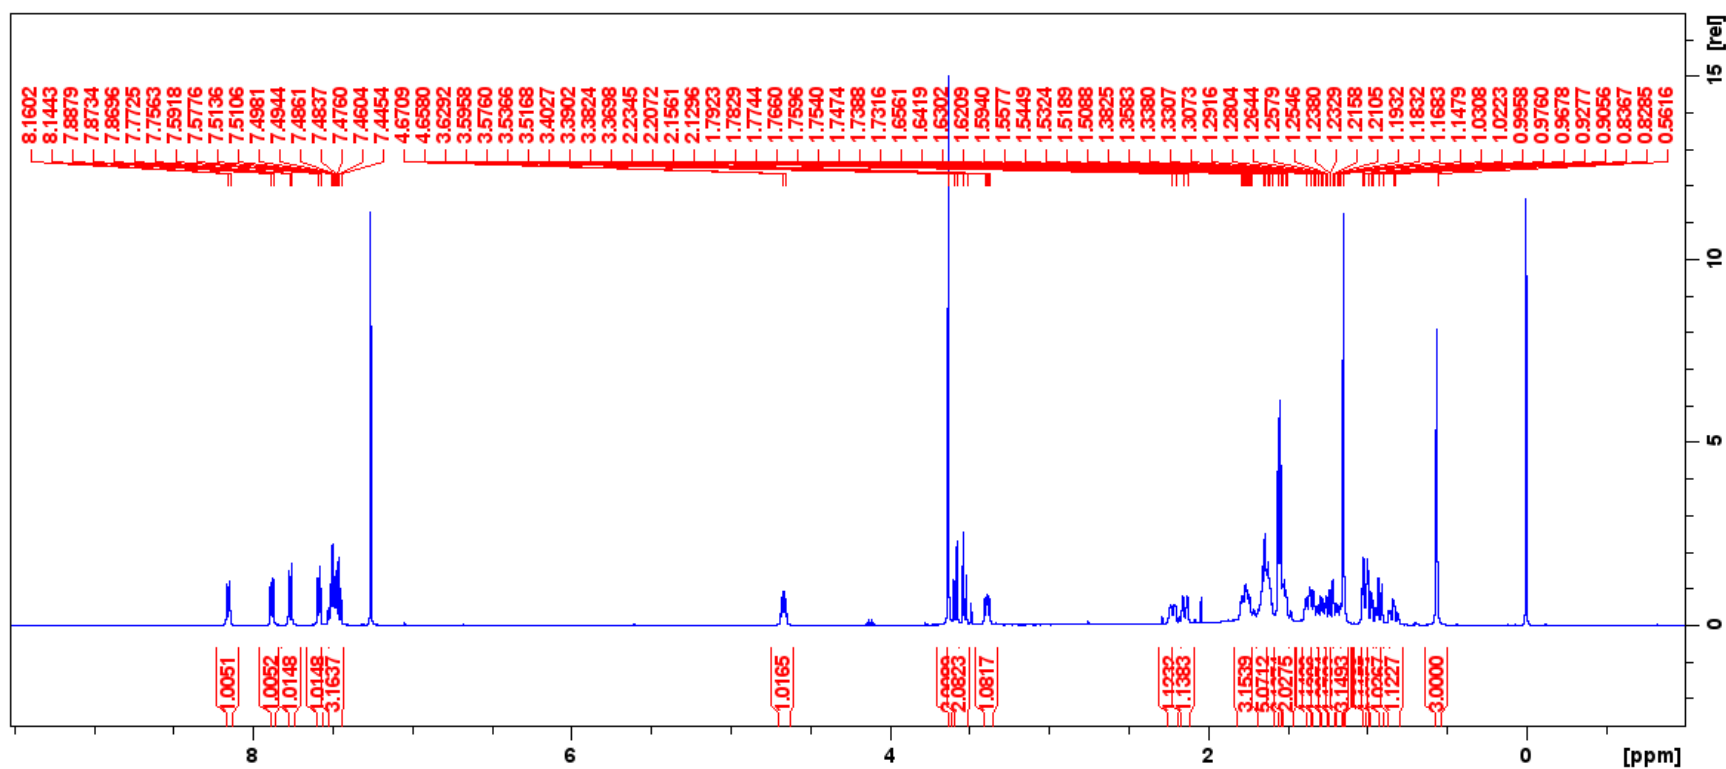

$^{13}\text{C}$ -NMR of compound (4*R*,4*aS*,6*aR*,8*R*,9*R*,11*aR*,11*bS*)-methyl 9-(hydroxymethyl)-4,11*b*-dimethyl-8-(((*R*)-1-(naphthalen-1-yl)ethyl)amino)tetradecahydro-6*a*,9-methanocyclohepta[*a*]naphthalene-4-carboxylate (**13**)

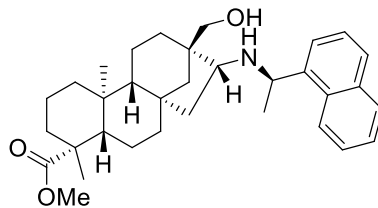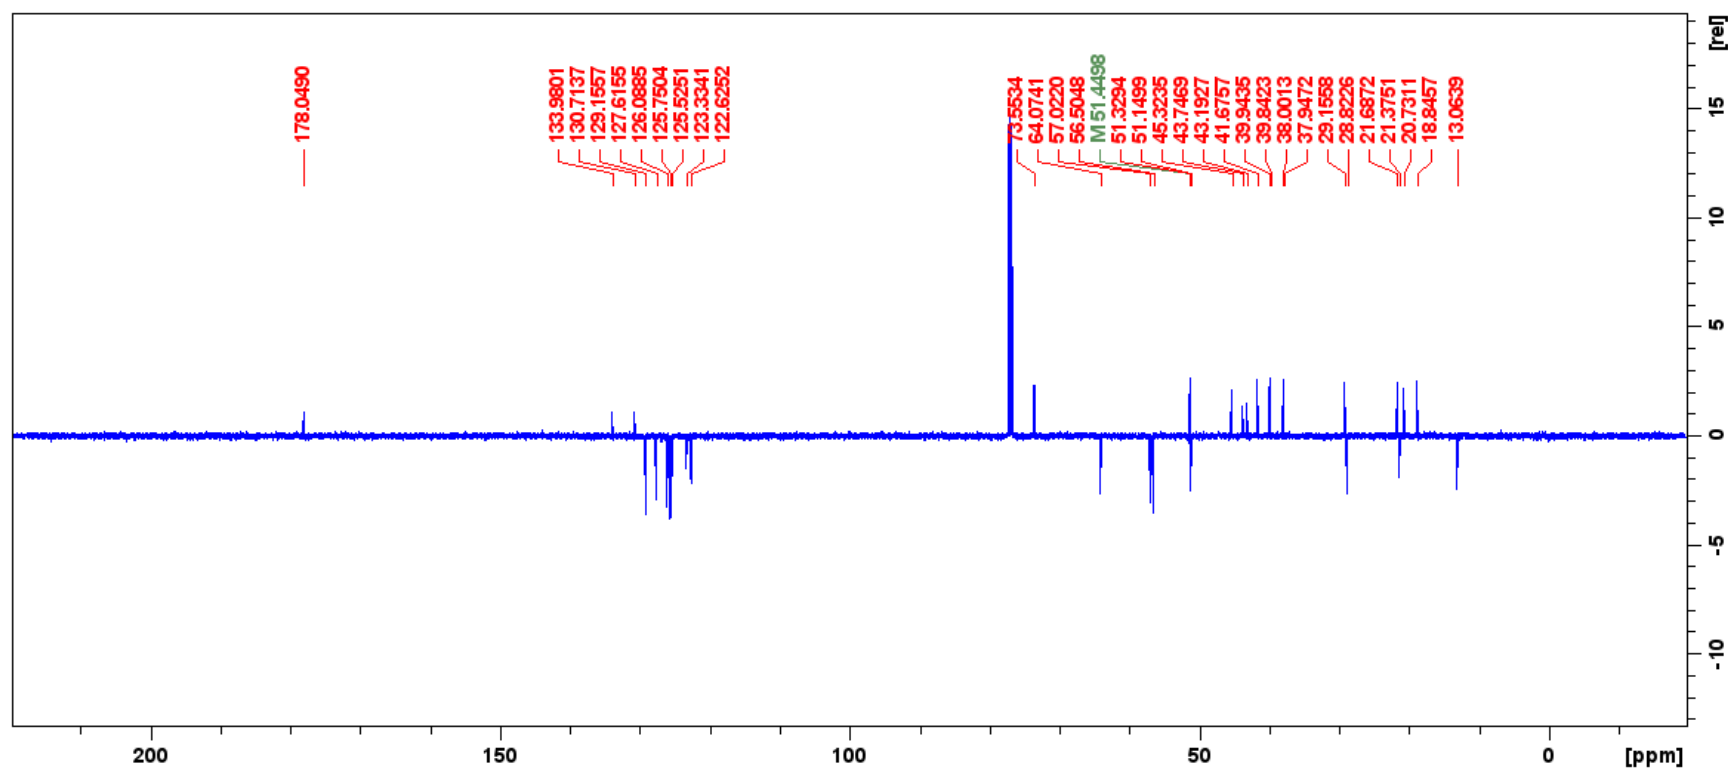

COSY of compound (4*R*,4*aS*,6*aR*,8*R*,9*R*,11*aR*,11*bS*)-methyl 9-(hydroxymethyl)-4,11*b*-dimethyl-8-(((*R*)-1-(naphthalen-1-yl)ethyl)amino)tetradecahydro-6*a*,9-methanocyclohepta[*a*]naphthalene-4-carboxylate (**13**)

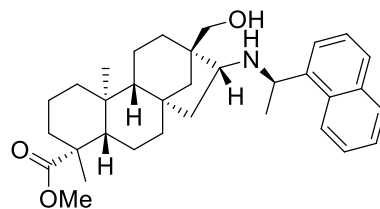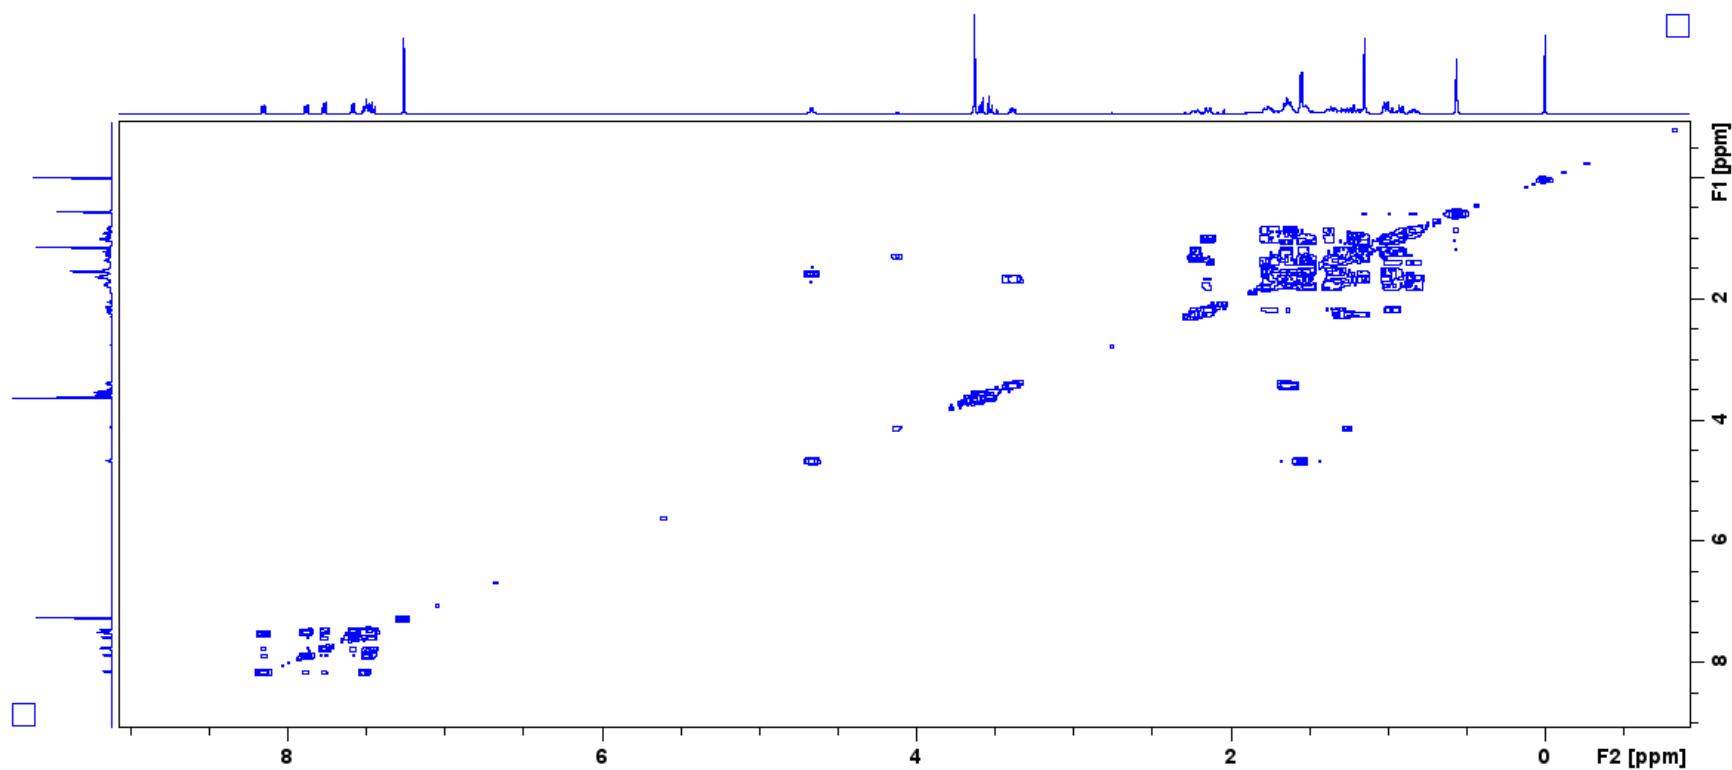

NOESY of compound (4*R*,4*aS*,6*aR*,8*R*,9*R*,11*aR*,11*bS*)-methyl 9-(hydroxymethyl)-4,11*b*-dimethyl-8-(((*R*)-1-(naphthalen-1-yl)ethyl)amino)tetradecahydro-6*a*,9-methanocyclohepta[*a*]naphthalene-4-carboxylate (**13**)

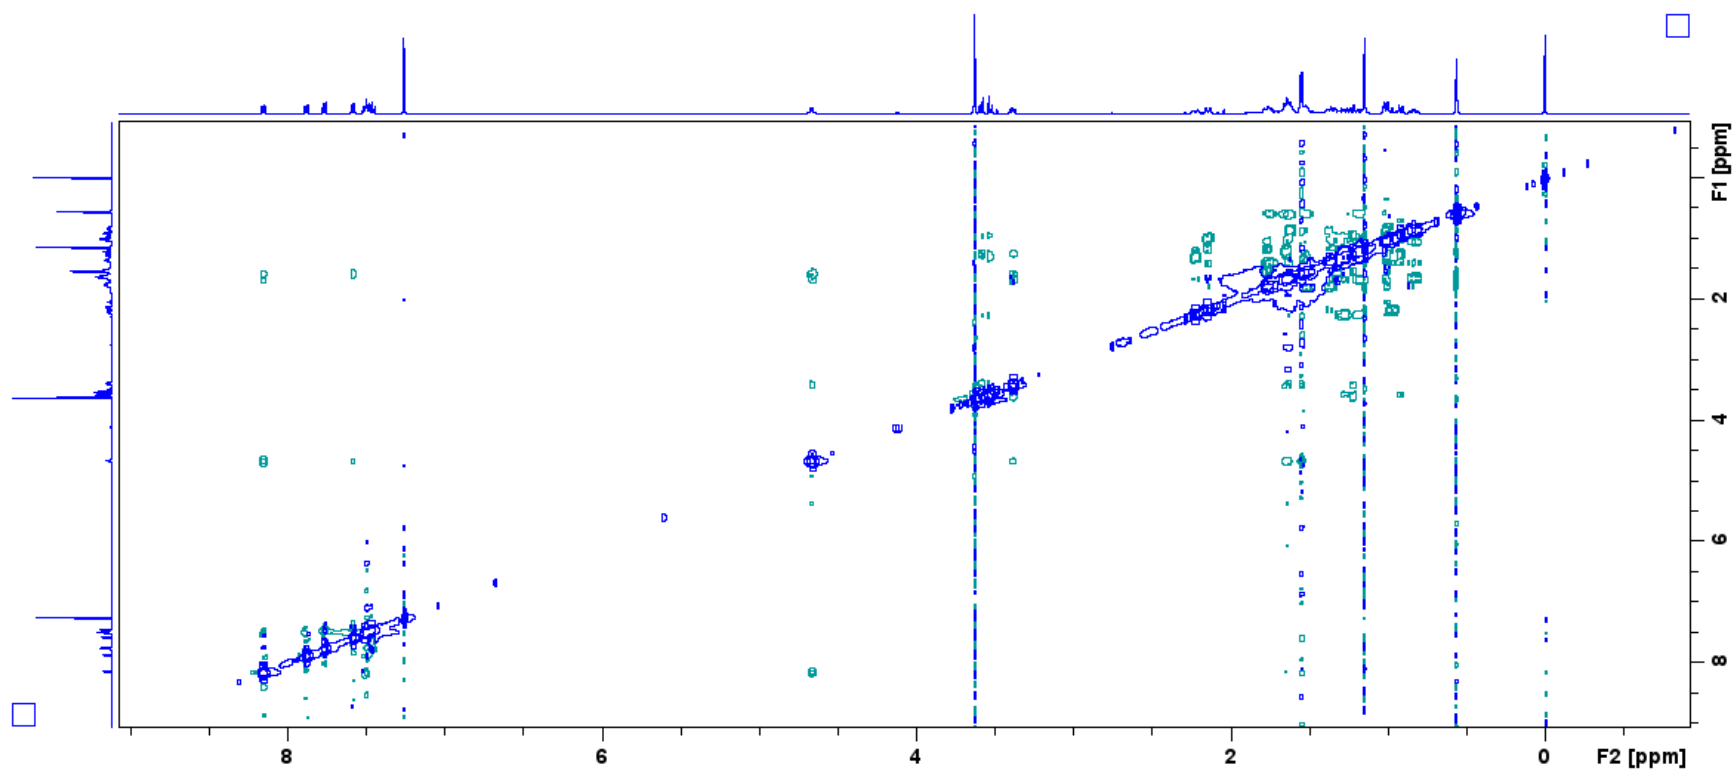

HSQC of compound (4*R*,4*aS*,6*aR*,8*R*,9*R*,11*aR*,11*bS*)-methyl 9-(hydroxymethyl)-4,11*b*-dimethyl-8-(((*R*)-1-(naphthalen-1-yl)ethyl)amino)tetradecahydro-6*a*,9-methanocyclohepta[*a*]naphthalene-4-carboxylate (**13**)

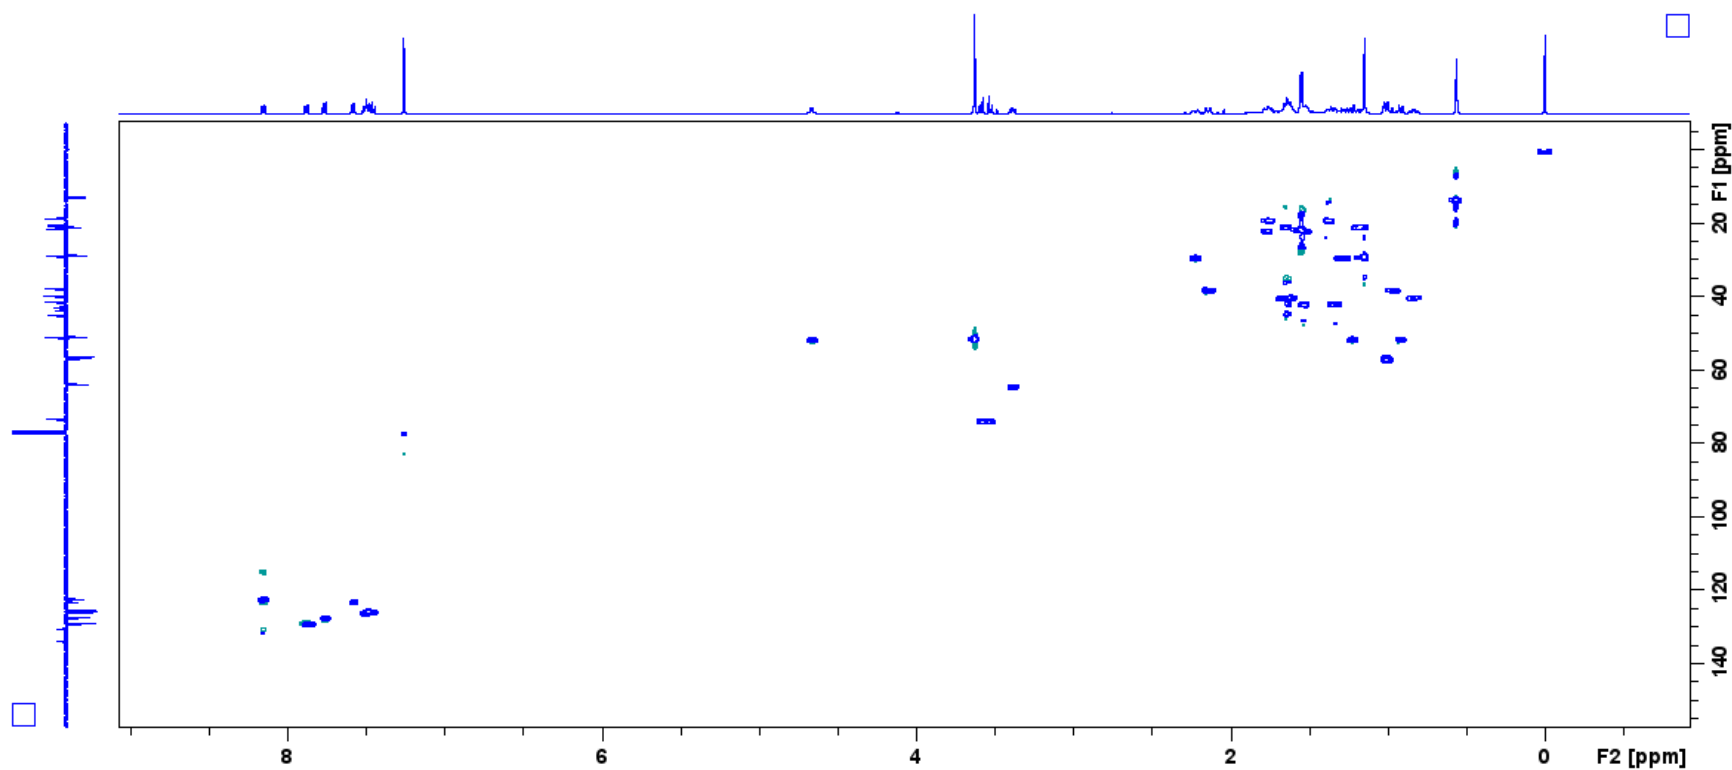

HMBC of compound (4*R*,4*aS*,6*aR*,8*R*,9*R*,11*aR*,11*bS*)-methyl 9-(hydroxymethyl)-4,11*b*-dimethyl-8-(((*R*)-1-(naphthalen-1-yl)ethyl)amino)tetradecahydro-6*a*,9-methanocyclohepta[*a*]naphthalene-4-carboxylate (**13**)

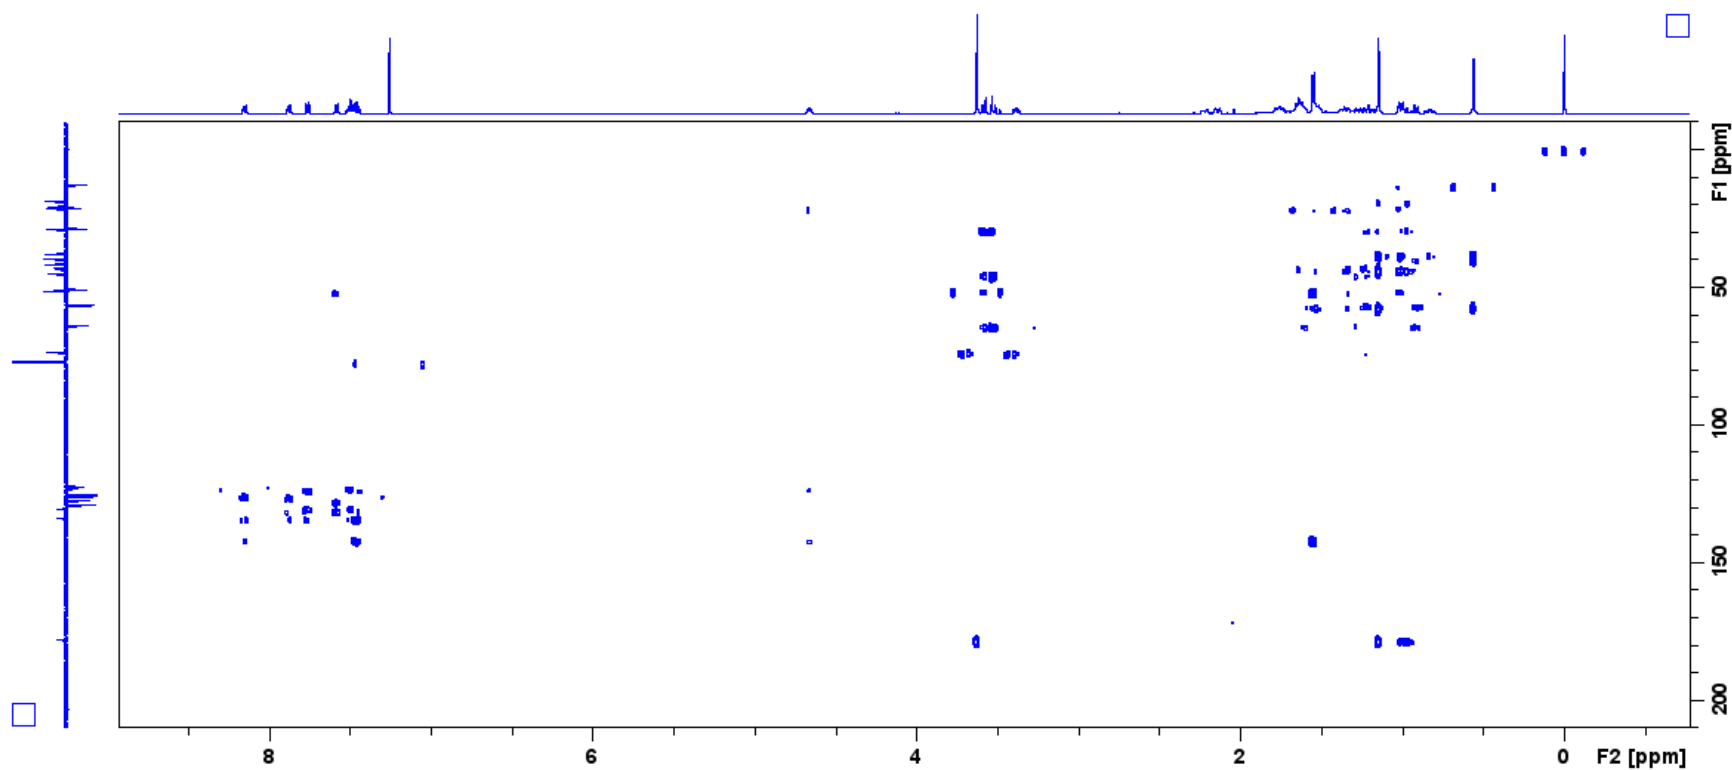

$^1\text{H}$ -NMR of compound (4*R*,4*aS*,6*aR*,8*R*,9*R*,11*aR*,11*bS*)-methyl 9-(hydroxymethyl)-4,11*b*-dimethyl-8-(((*S*)-1-(naphthalen-1-yl)ethyl)amino)tetradecahydro-6*a*,9-methanocyclohepta[*a*]naphthalene-4-carboxylate (**14**)

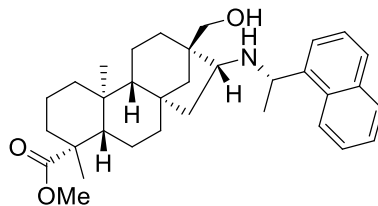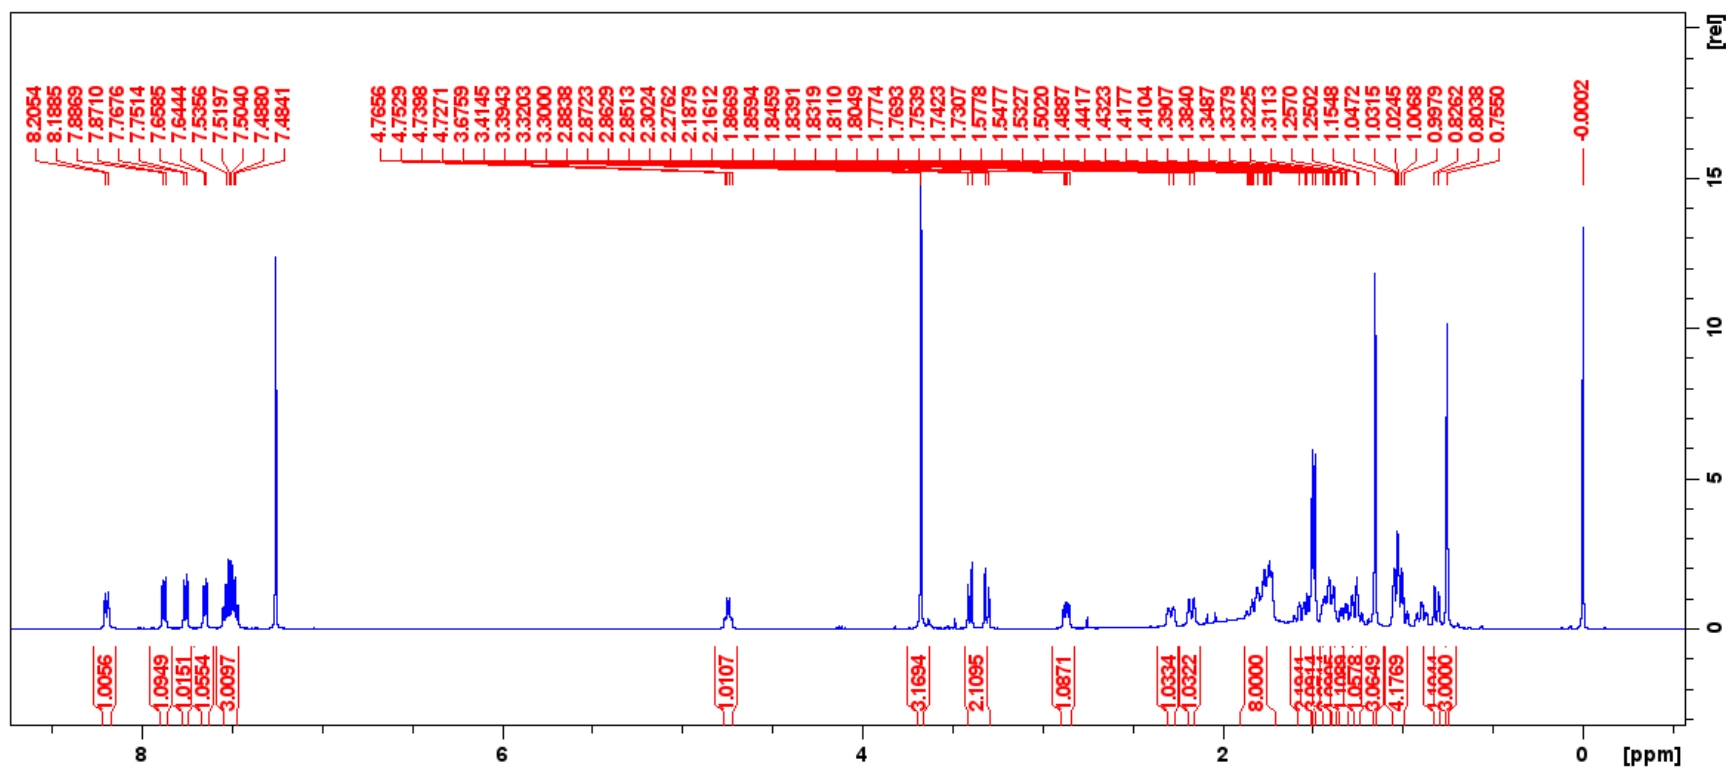

$^{13}\text{C}$ -NMR of compound (4*R*,4*aS*,6*aR*,8*R*,9*R*,11*aR*,11*bS*)-methyl 9-(hydroxymethyl)-4,11*b*-dimethyl-8-(((*S*)-1-(naphthalen-1-yl)ethyl)amino)tetradecahydro-6*a*,9-methanocyclohepta[*a*]naphthalene-4-carboxylate (**14**)

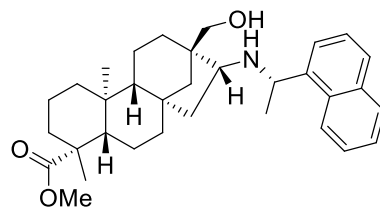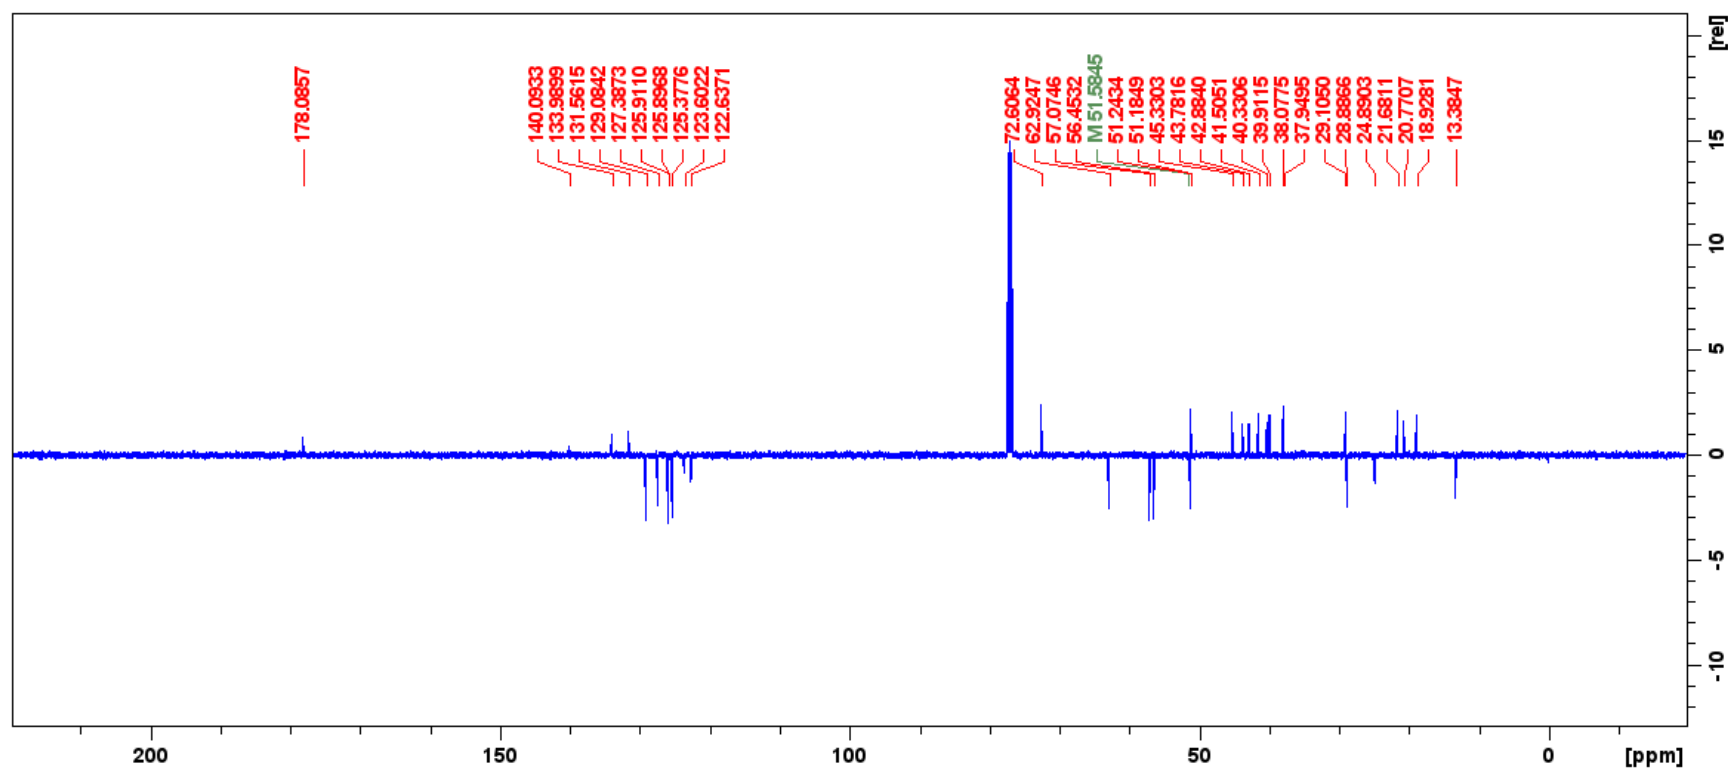



COSY of compound (4*R*,4*aS*,6*aR*,8*R*,9*R*,11*aR*,11*bS*)-methyl 9-(hydroxymethyl)-4,11*b*-dimethyl-8-(((*S*)-1-(naphthalen-1-yl)ethyl)amino)tetradecahydro-6*a*,9-methanocyclohepta[*a*]naphthalene-4-carboxylate (**14**)

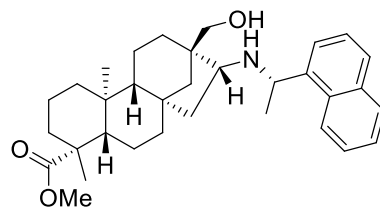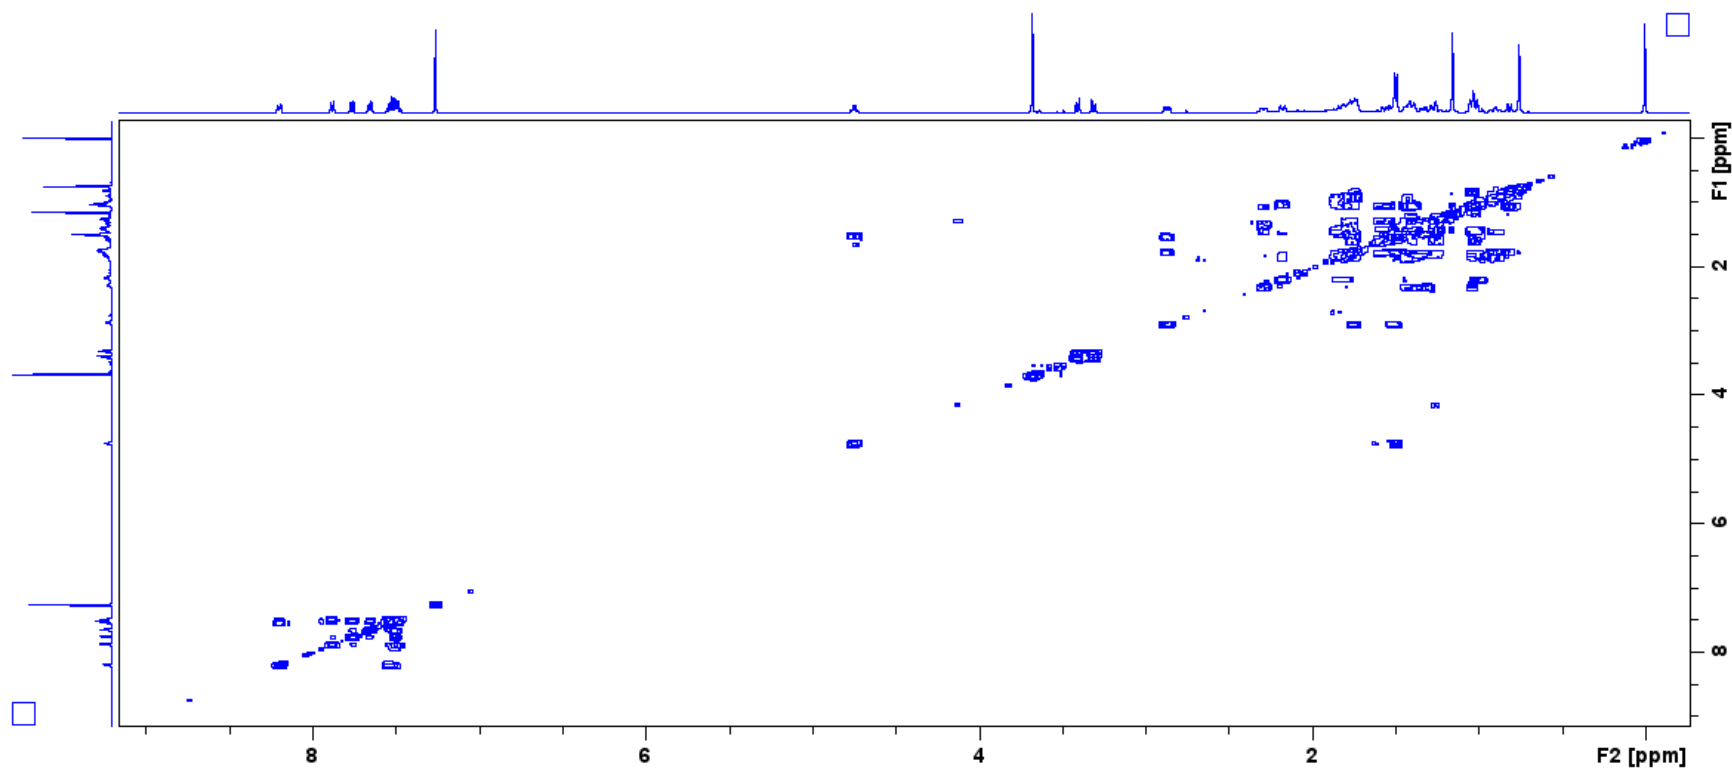

NOESY of compound (4*R*,4*aS*,6*aR*,8*R*,9*R*,11*aR*,11*bS*)-methyl 9-(hydroxymethyl)-4,11*b*-dimethyl-8-(((*S*)-1-(naphthalen-1-yl)ethyl)amino)tetradecahydro-6*a*,9-methanocyclohepta[*a*]naphthalene-4-carboxylate (**14**)

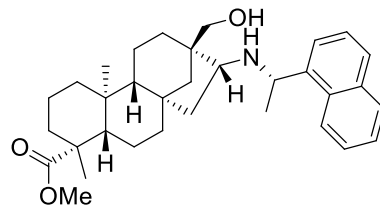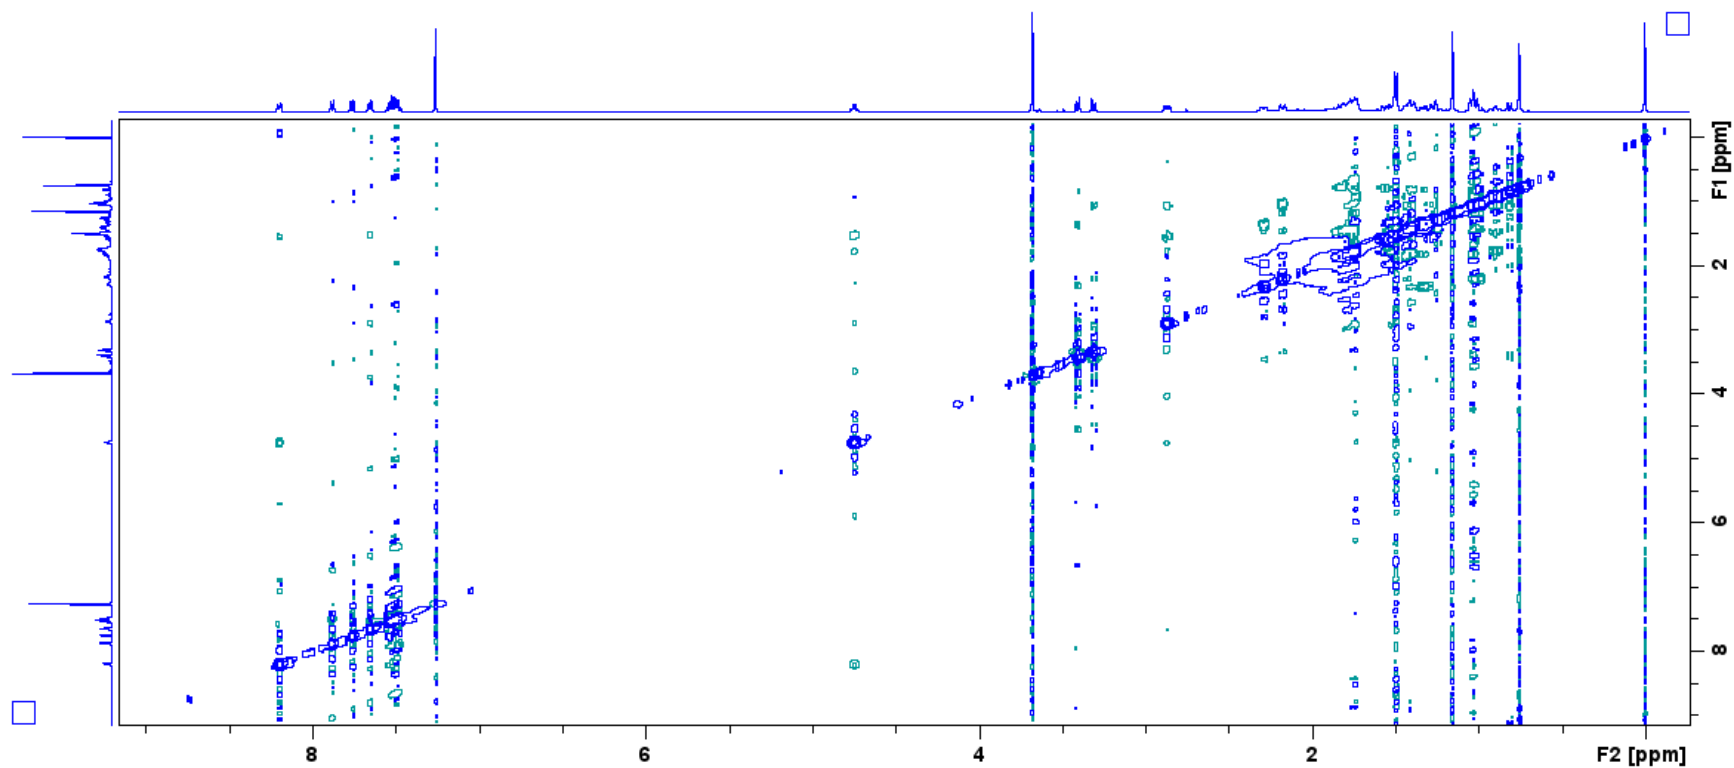

HSQC of compound (4*R*,4*aS*,6*aR*,8*R*,9*R*,11*aR*,11*bS*)-methyl 9-(hydroxymethyl)-4,11*b*-dimethyl-8-(((*S*)-1-(naphthalen-1-yl)ethyl)amino)tetradecahydro-6*a*,9-methanocyclohepta[*a*]naphthalene-4-carboxylate (**14**)

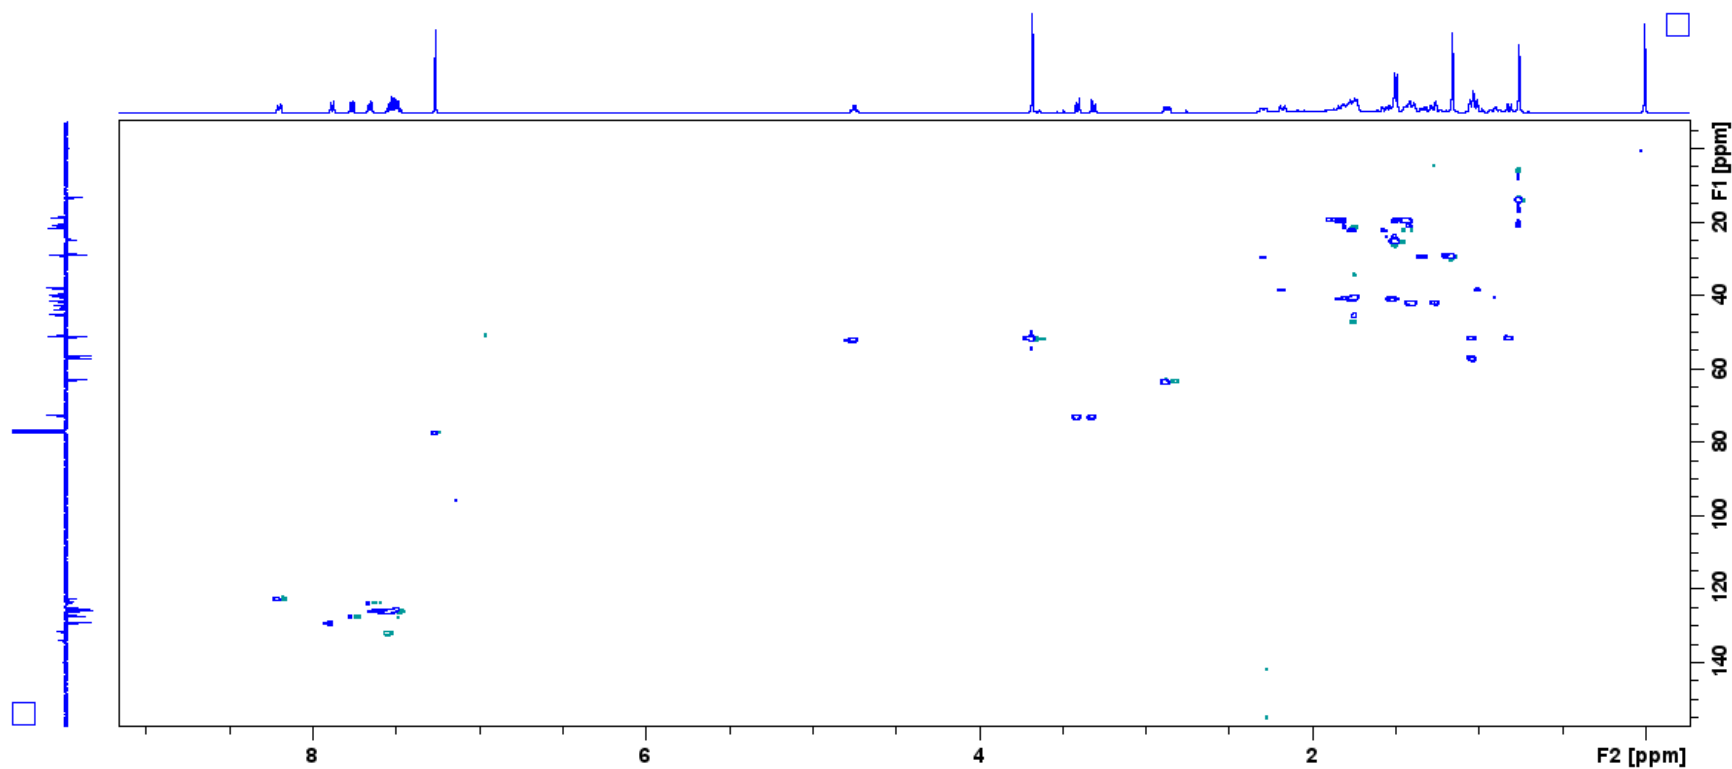

HMBC of compound (4*R*,4*aS*,6*aR*,8*R*,9*R*,11*aR*,11*bS*)-methyl 9-(hydroxymethyl)-4,11*b*-dimethyl-8-(((*S*)-1-(naphthalen-1-yl)ethyl)amino)tetradecahydro-6*a*,9-methanocyclohepta[*a*]naphthalene-4-carboxylate (**14**)

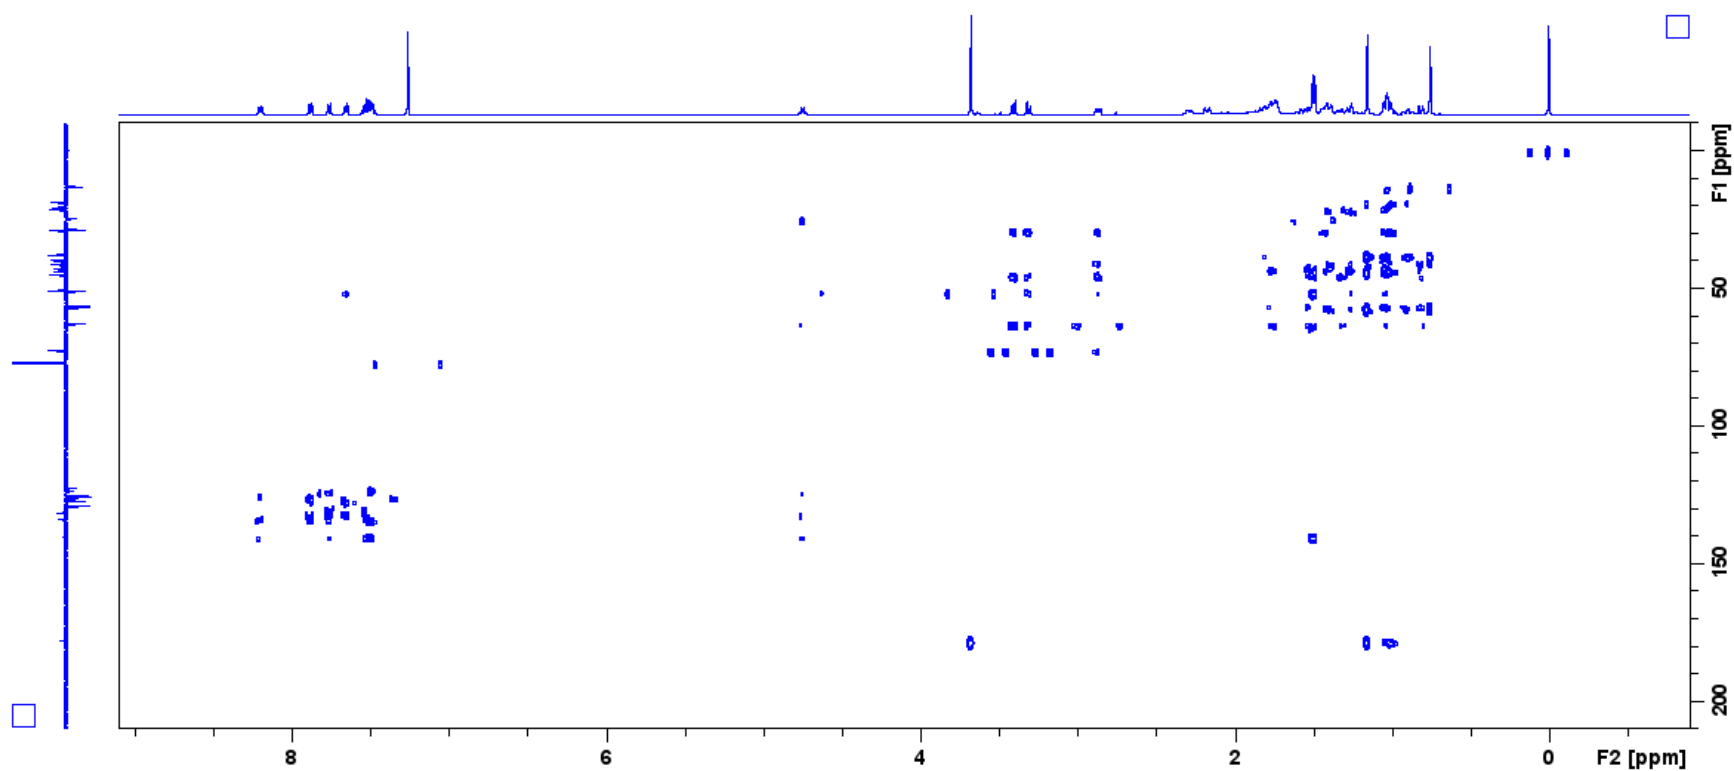

$^1\text{H}$ -NMR of compound (4*R*,4*aS*,6*aR*,8*R*,9*R*,11*aR*,11*bS*)-methyl 9-(hydroxymethyl)-4,11*b*-dimethyl-8-((naphthalen-1-ylmethyl)amino)tetradecahydro-6*a*,9-methanocyclohepta[*a*]naphthalene-4-carboxylate (**15**)

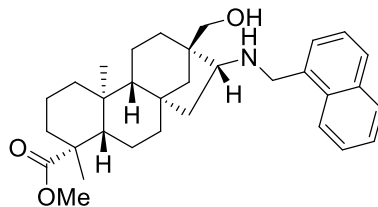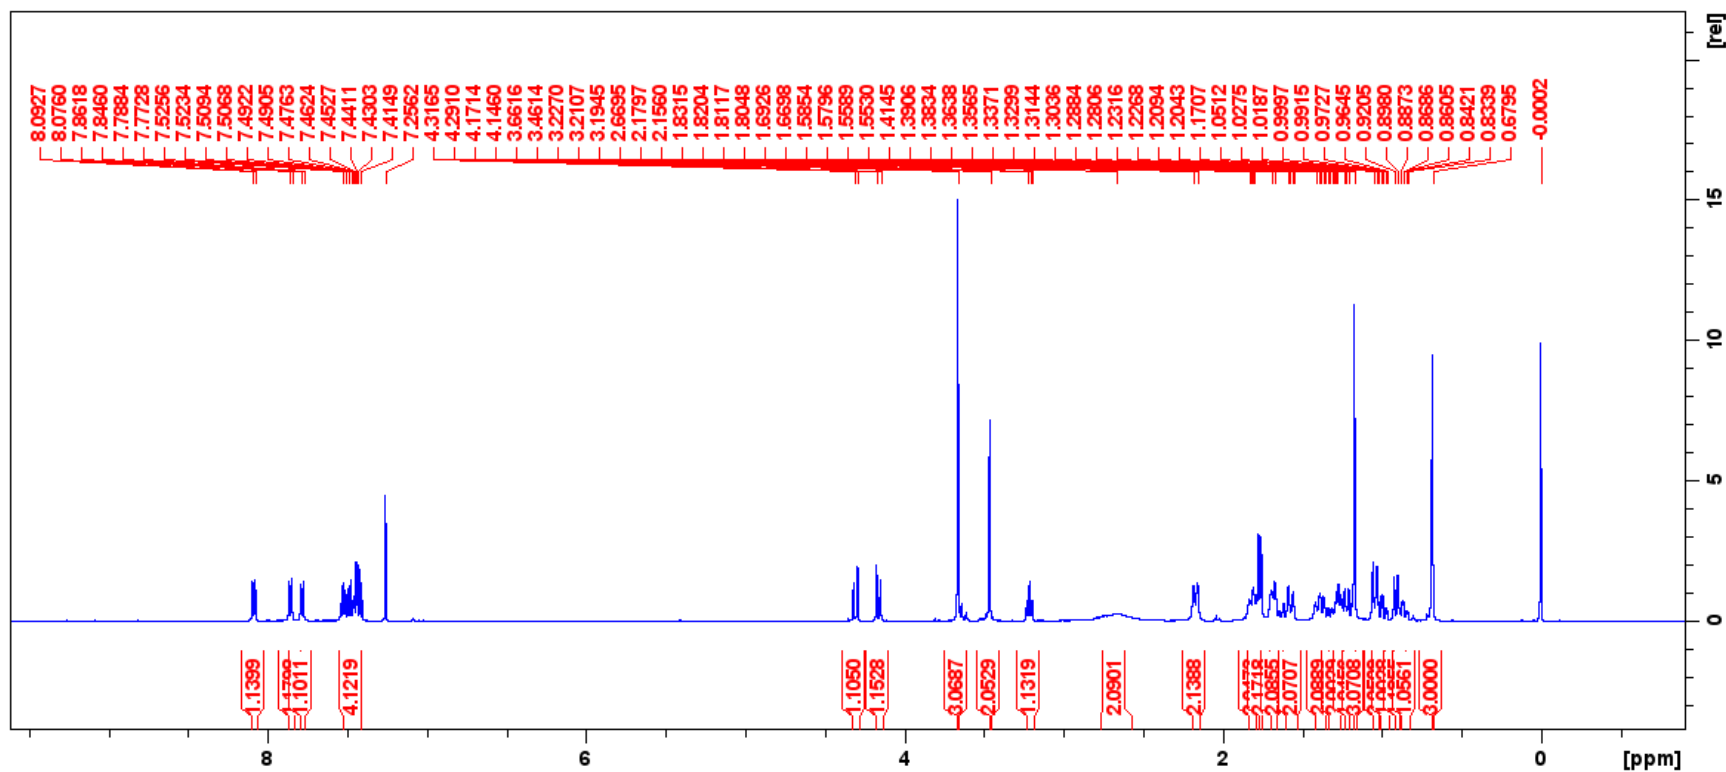

$^{13}\text{C}$ -NMR of compound (4*R*,4*aS*,6*aR*,8*R*,9*R*,11*aR*,11*bS*)-methyl 9-(hydroxymethyl)-4,11*b*-dimethyl-8-((naphthalen-1-ylmethyl)amino)tetradecahydro-6*a*,9-methanocyclohepta[*a*]naphthalene-4-carboxylate (**15**)

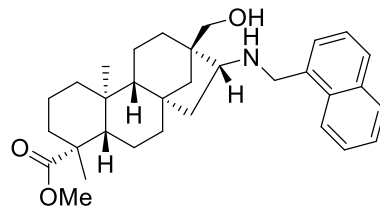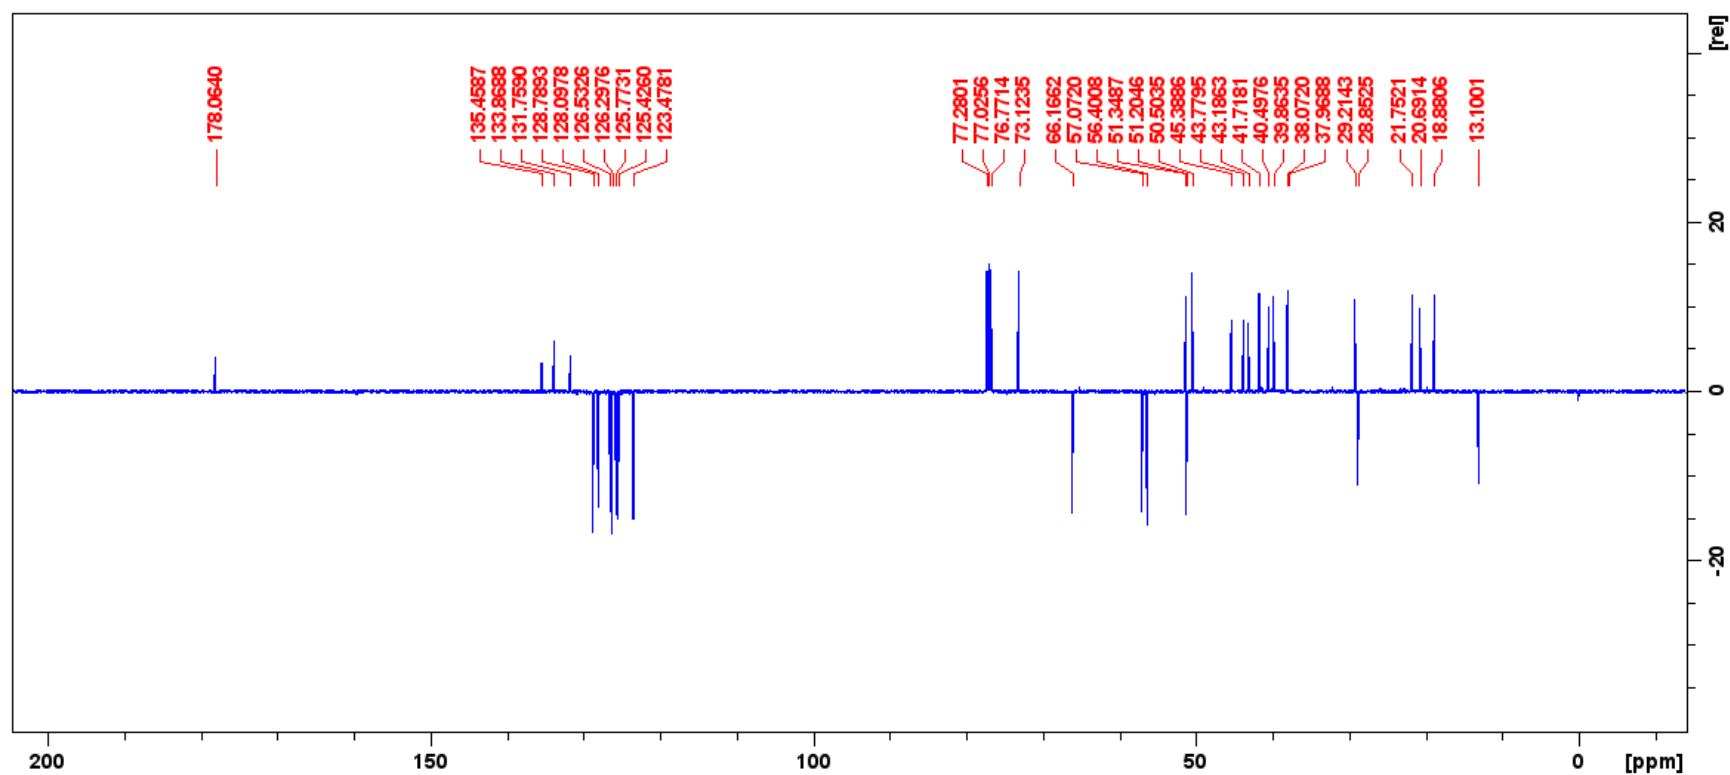

COSY of compound (4*R*,4*aS*,6*aR*,8*R*,9*R*,11*aR*,11*bS*)-methyl 9-(hydroxymethyl)-4,11*b*-dimethyl-8-((naphthalen-1-ylmethyl)amino)tetradecaahydro-6*a*,9-methanocyclohepta[*a*]naphthalene-4-carboxylate (**15**)

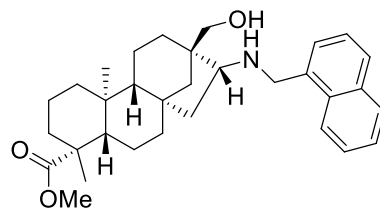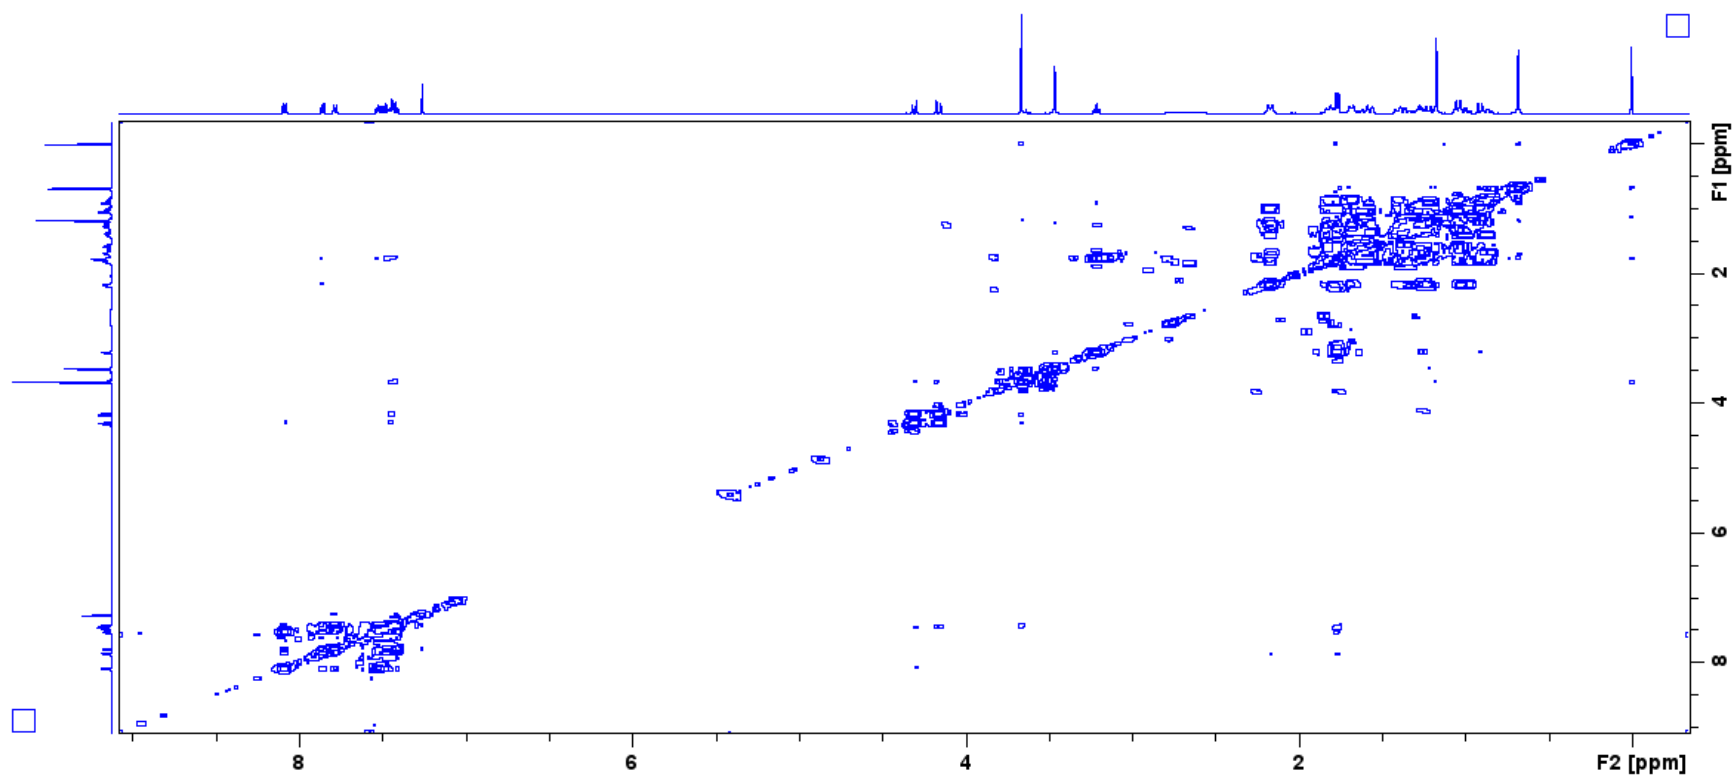

NOESY of compound (4*R*,4*aS*,6*aR*,8*R*,9*R*,11*aR*,11*bS*)-methyl 9-(hydroxymethyl)-4,11*b*-dimethyl-8-((naphthalen-1-ylmethyl)amino)tetradecahydro-6*a*,9-methanocyclohepta[*a*]naphthalene-4-carboxylate (**15**)

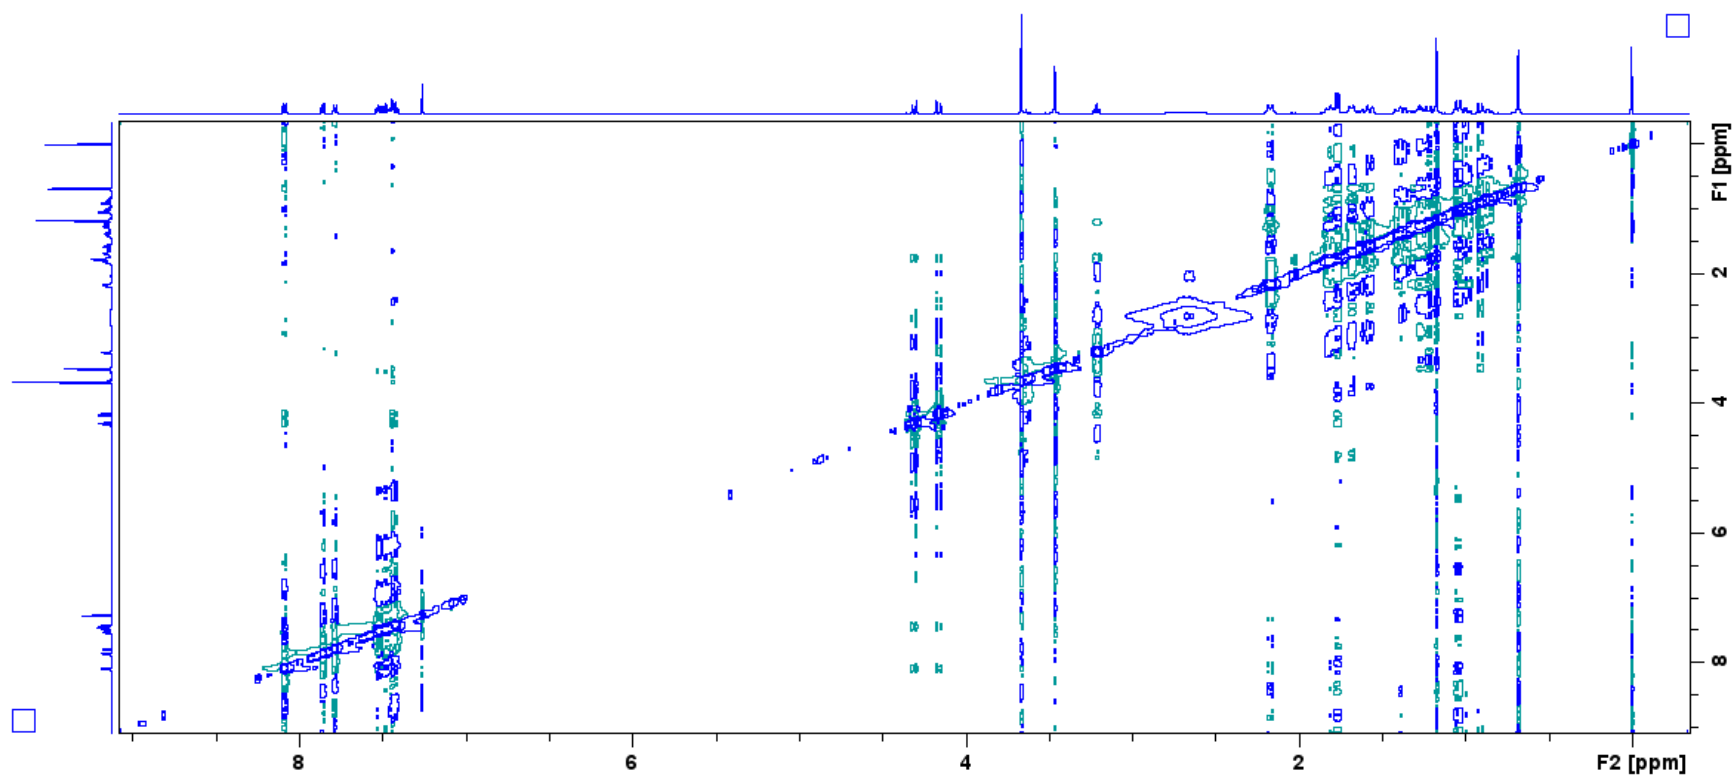



HSQC of compound (4*R*,4*aS*,6*aR*,8*R*,9*R*,11*aR*,11*bS*)-methyl 9-(hydroxymethyl)-4,11*b*-dimethyl-8-((naphthalen-1-ylmethyl)amino)tetradecaahydro-6*a*,9-methanocyclohepta[*a*]naphthalene-4-carboxylate (**15**)

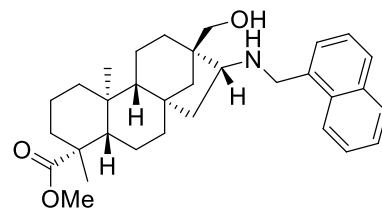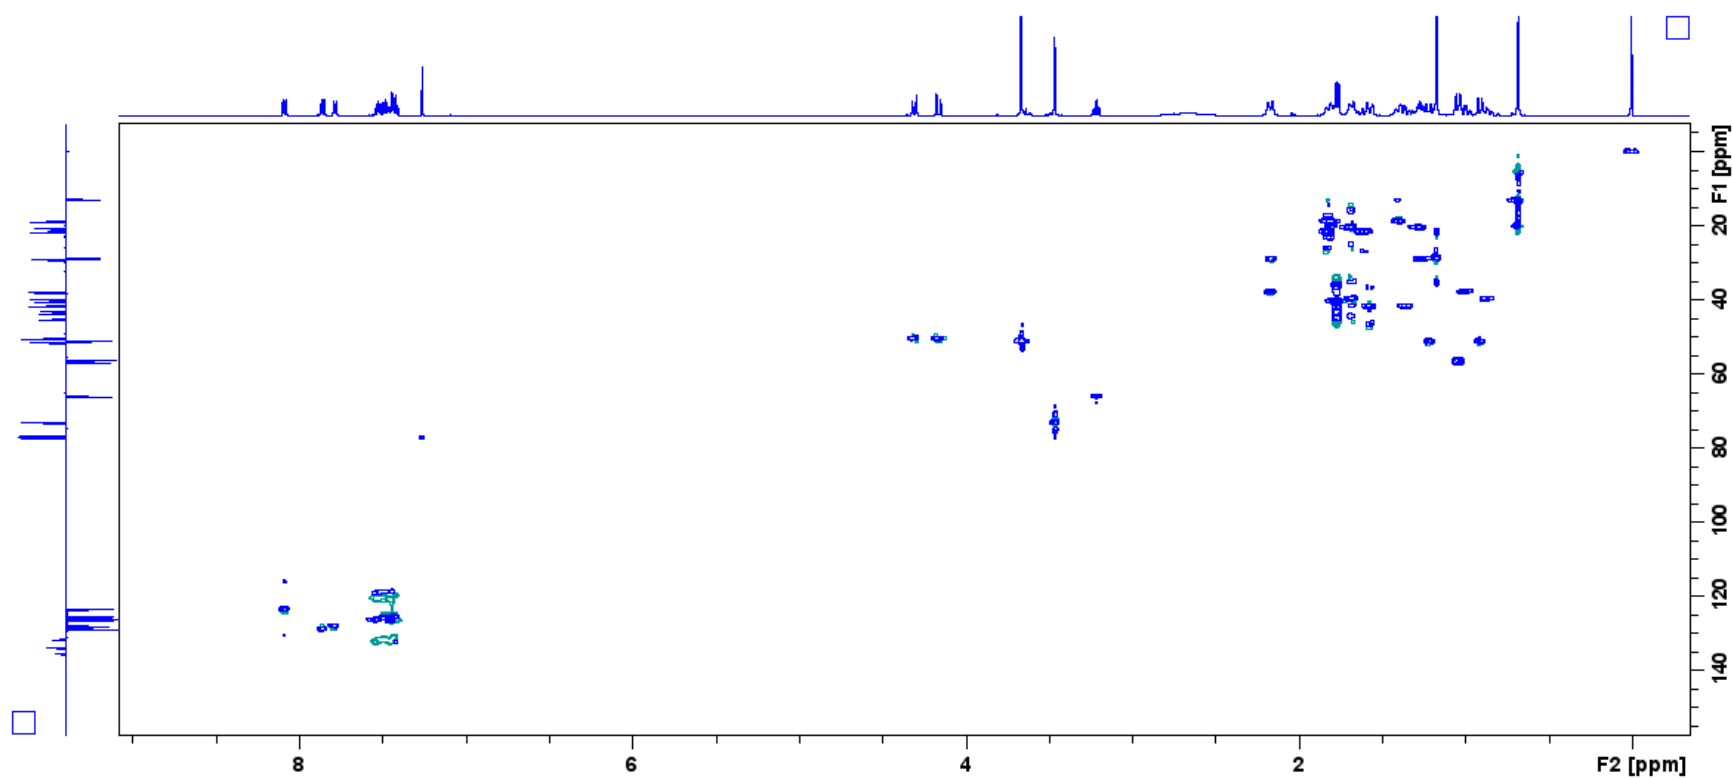

HMBC of compound (4*R*,4*aS*,6*aR*,8*R*,9*R*,11*aR*,11*bS*)-methyl 9-(hydroxymethyl)-4,11*b*-dimethyl-8-((naphthalen-1-ylmethyl)amino)tetradecahydro-6*a*,9-methanocyclohepta[*a*]naphthalene-4-carboxylate (**15**)

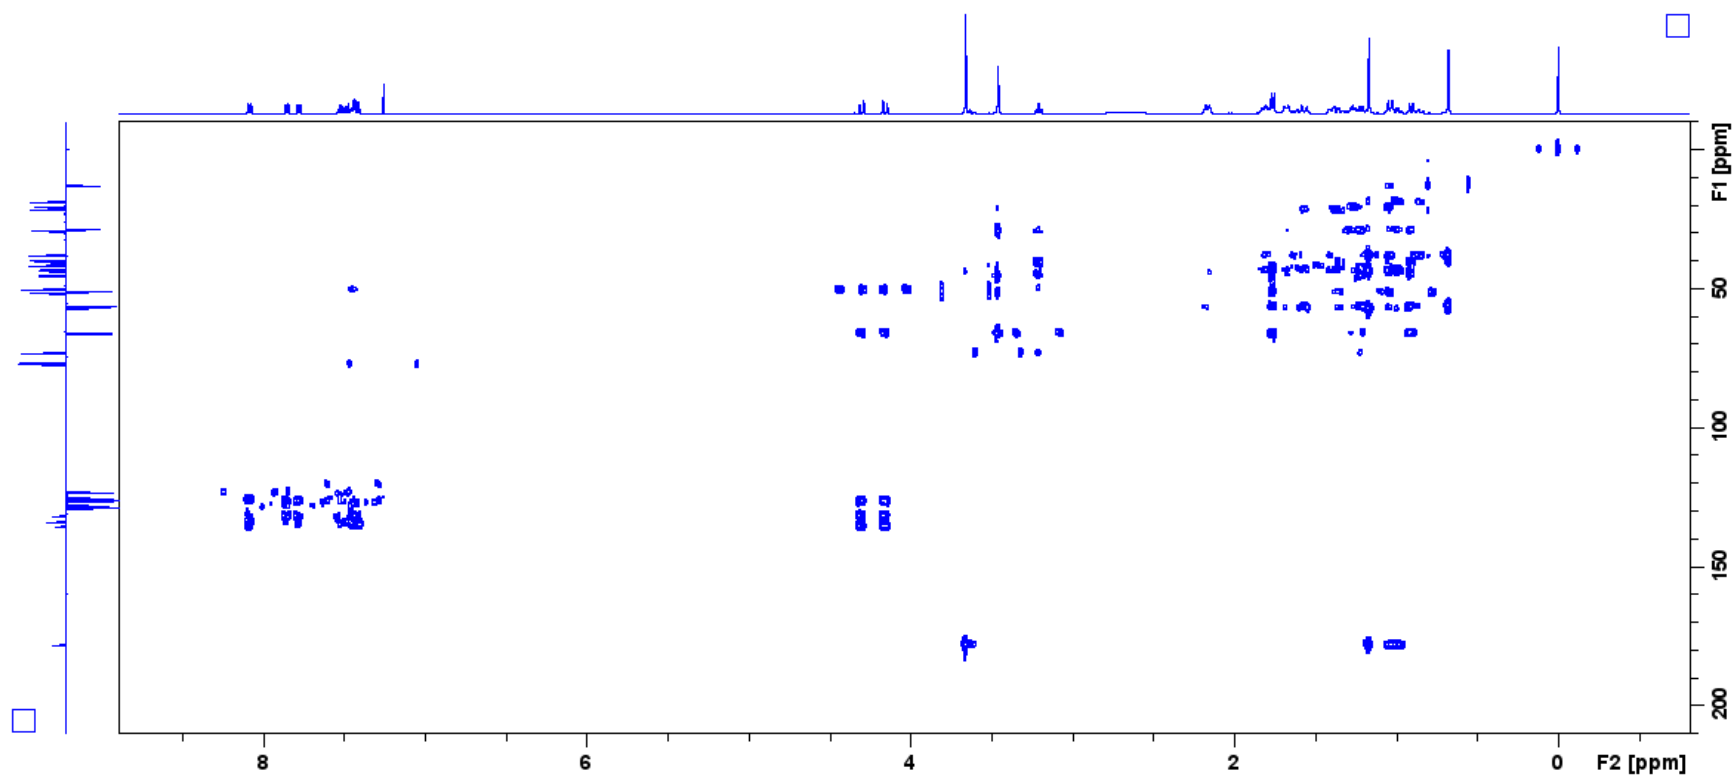

$^1\text{H}$ -NMR of compound (4*R*,4*aS*,6*aR*,8*R*,9*R*,11*aR*,11*bS*)-methyl 9-(hydroxymethyl)-4,11*b*-dimethyl-8-(((*S*)-1-(naphthalen-2-yl)ethyl)amino)tetradecahydro-6*a*,9-methanocyclohepta[*a*]naphthalene-4-carboxylate (**16**)

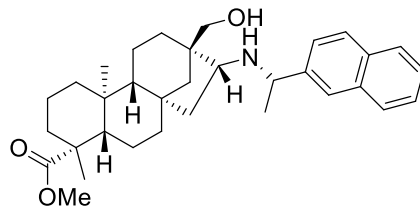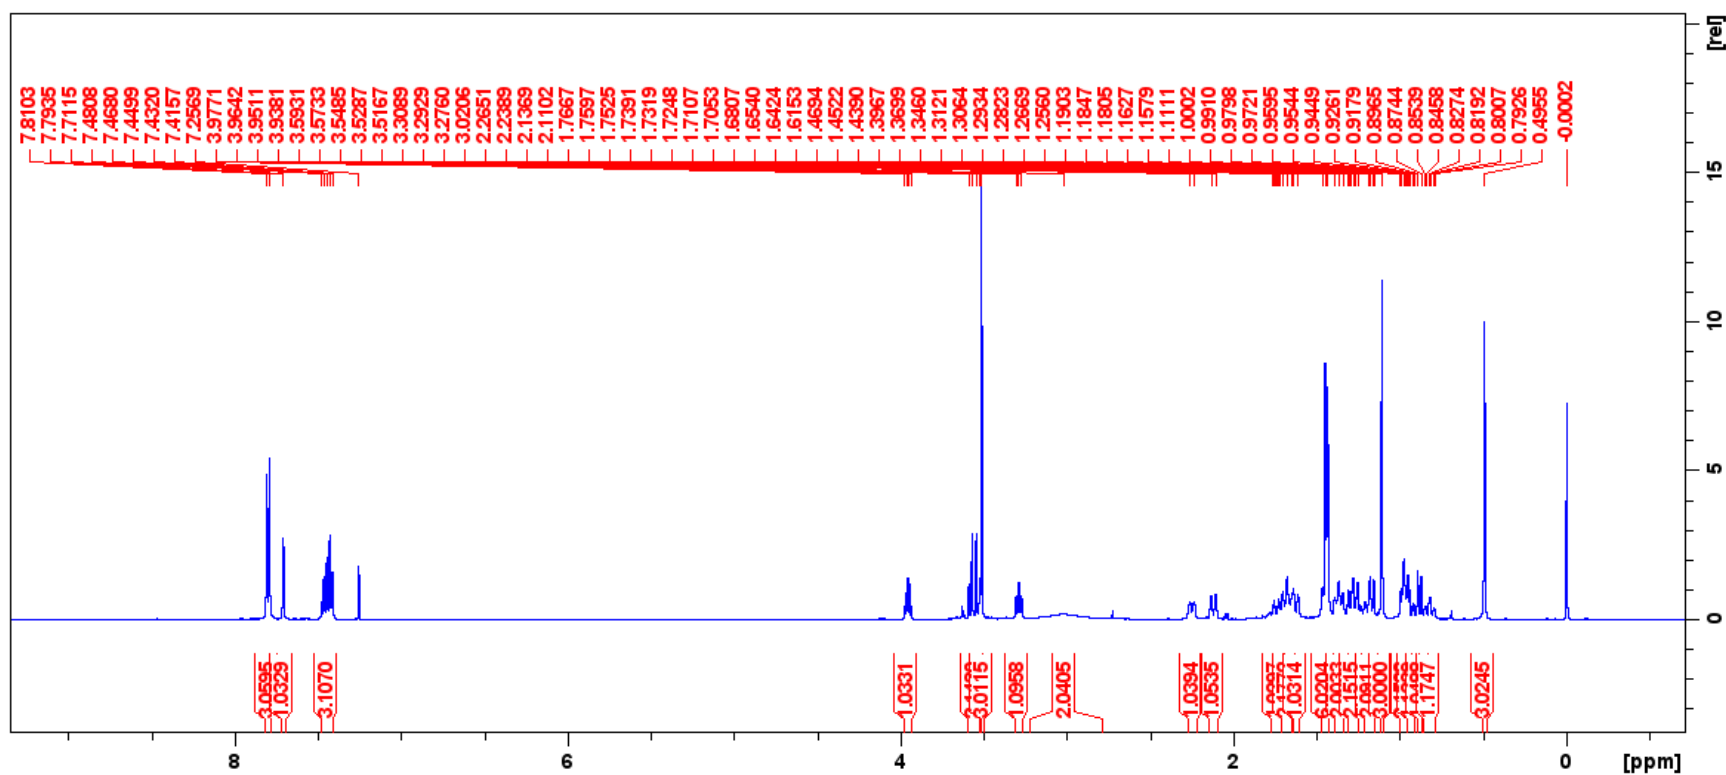

$^{13}\text{C}$ -NMR of compound (4*R*,4*aS*,6*aR*,8*R*,9*R*,11*aR*,11*bS*)-methyl 9-(hydroxymethyl)-4,11*b*-dimethyl-8-(((*S*)-1-(naphthalen-2-yl)ethyl)amino)tetradecahydro-6*a*,9-methanocyclohepta[*a*]naphthalene-4-carboxylate (**16**)

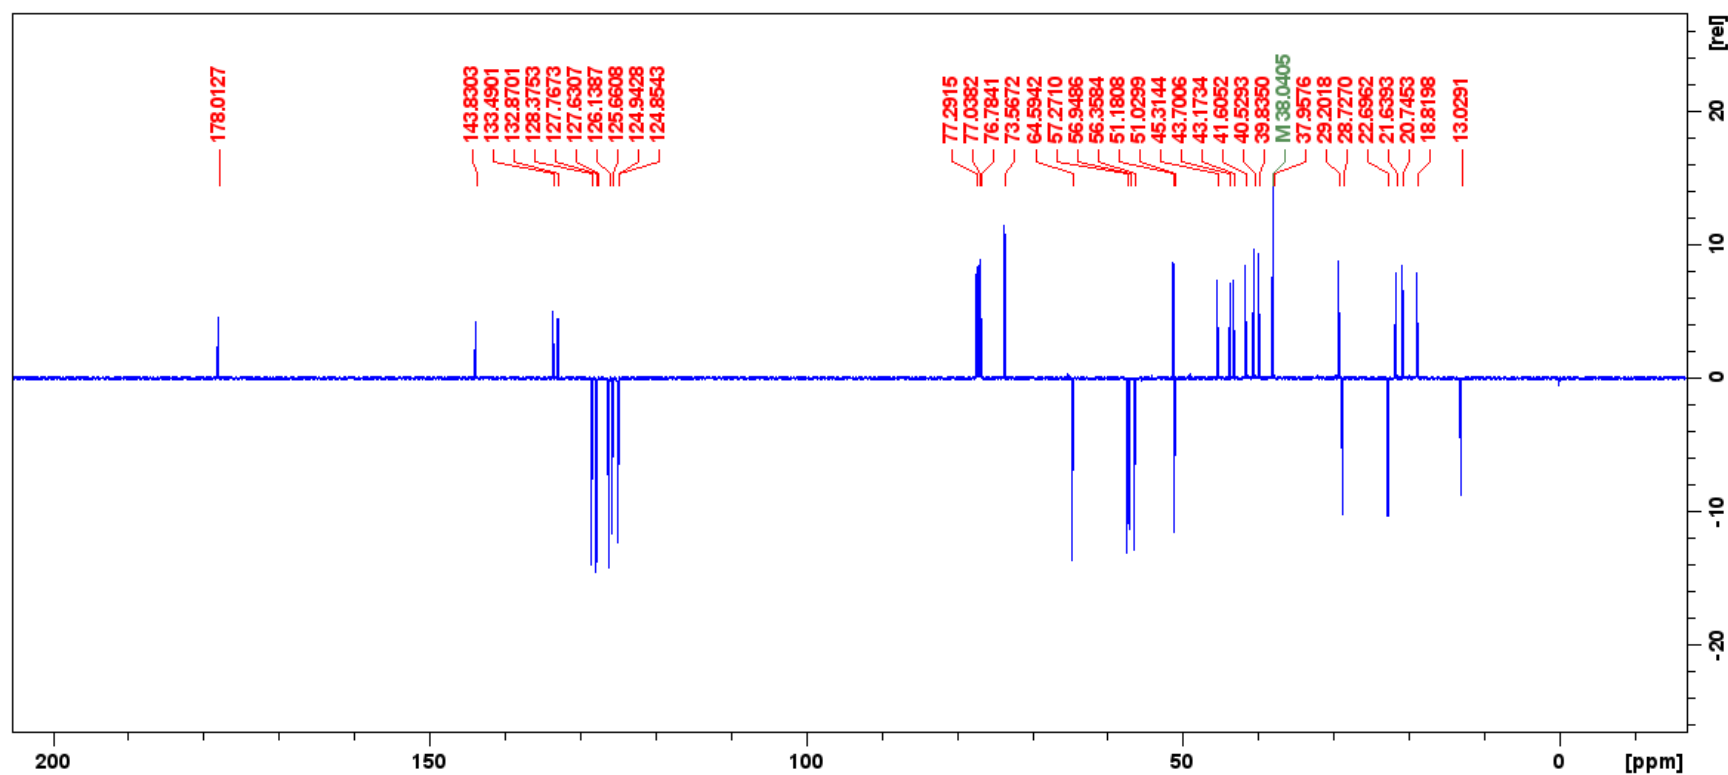

COSY of compound (4*R*,4*aS*,6*aR*,8*R*,9*R*,11*aR*,11*bS*)-methyl 9-(hydroxymethyl)-4,11*b*-dimethyl-8-(((*S*)-1-(naphthalen-2-yl)ethyl)amino)tetradecahydro-6*a*,9-methanocyclohepta[*a*]naphthalene-4-carboxylate (**16**)

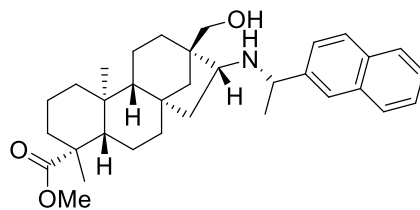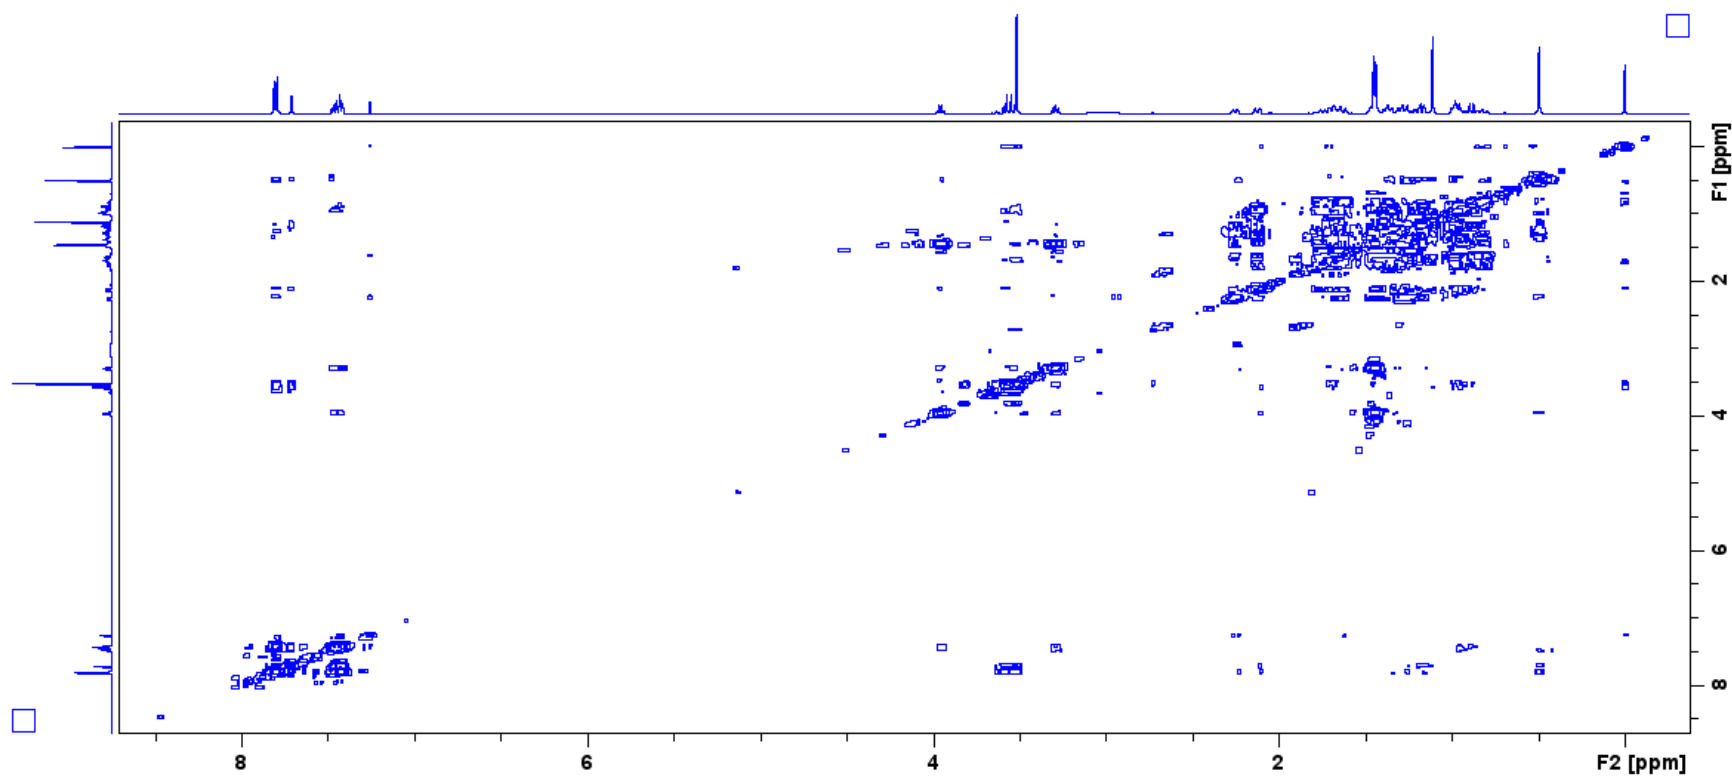

NOESY of compound (4*R*,4*aS*,6*aR*,8*R*,9*R*,11*aR*,11*bS*)-methyl 9-(hydroxymethyl)-4,11*b*-dimethyl-8-(((*S*)-1-(naphthalen-2-yl)ethyl)amino)tetradecahydro-6*a*,9-methanocyclohepta[*a*]naphthalene-4-carboxylate (**16**)

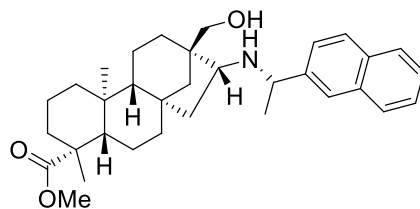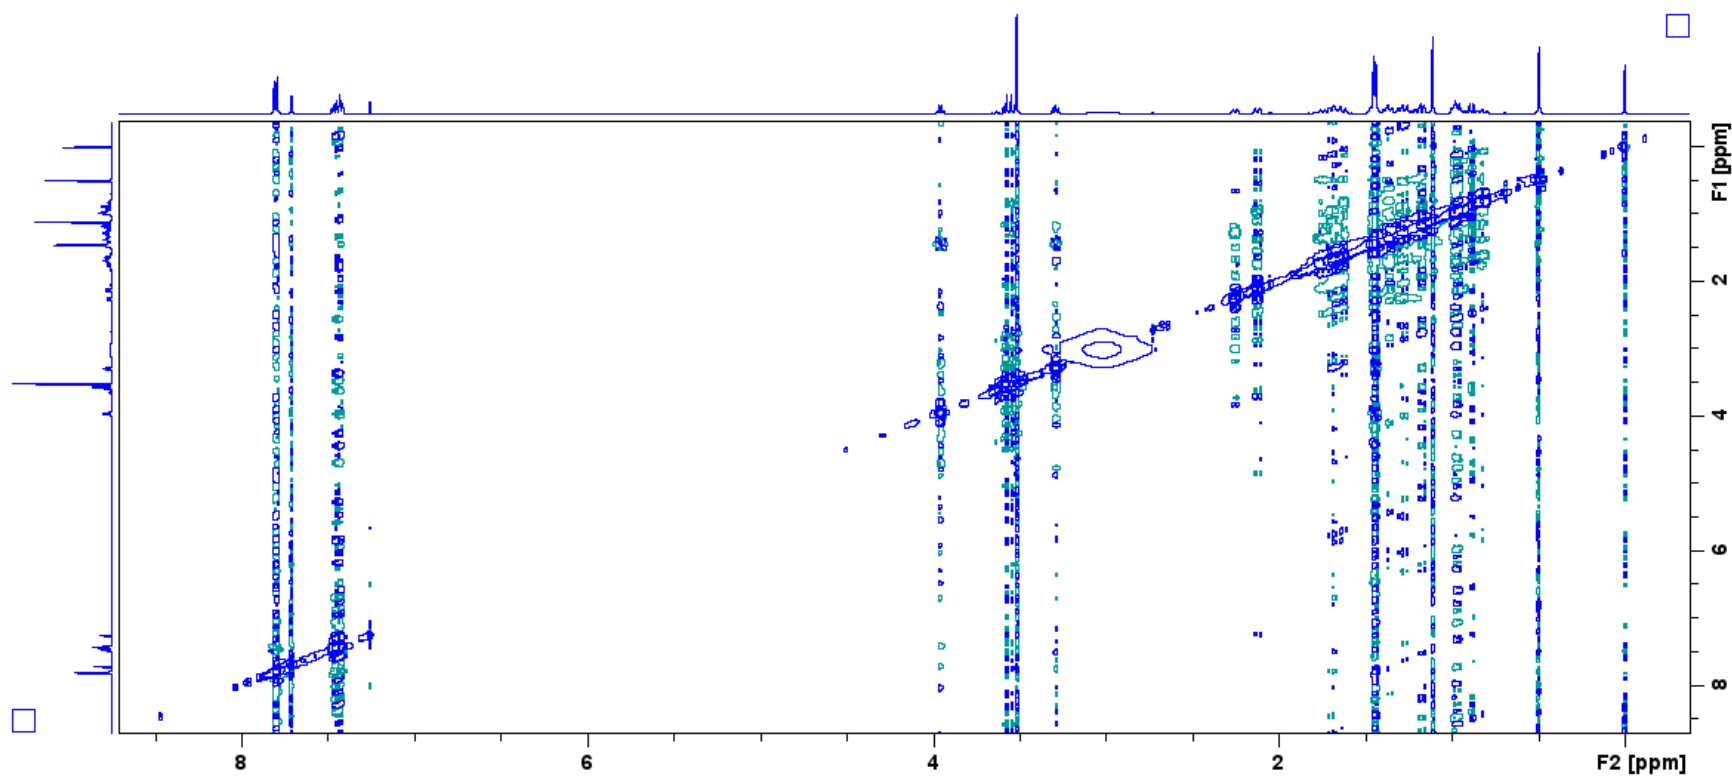

HSQC of compound (4*R*,4*aS*,6*aR*,8*R*,9*R*,11*aR*,11*bS*)-methyl 9-(hydroxymethyl)-4,11*b*-dimethyl-8-(((*S*)-1-(naphthalen-2-yl)ethyl)amino)tetradecahydro-6*a*,9-methanocyclohepta[*a*]naphthalene-4-carboxylate (**16**)

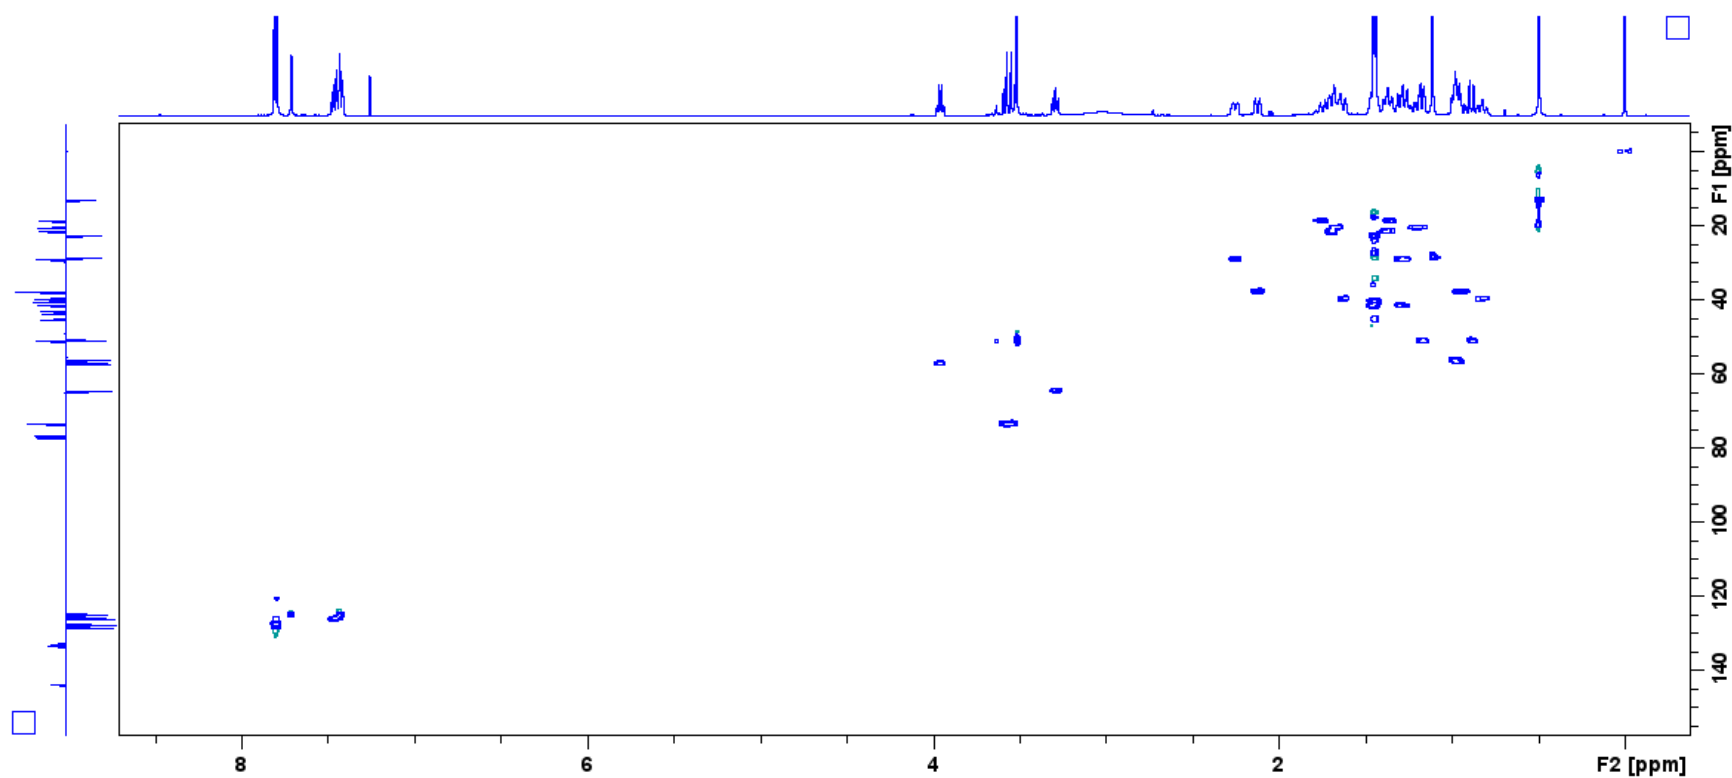

HMBC of compound (4*R*,4*aS*,6*aR*,8*R*,9*R*,11*aR*,11*bS*)-methyl 9-(hydroxymethyl)-4,11*b*-dimethyl-8-(((*S*)-1-(naphthalen-2-yl)ethyl)amino)tetradecahydro-6*a*,9-methanocyclohepta[*a*]naphthalene-4-carboxylate (**16**)

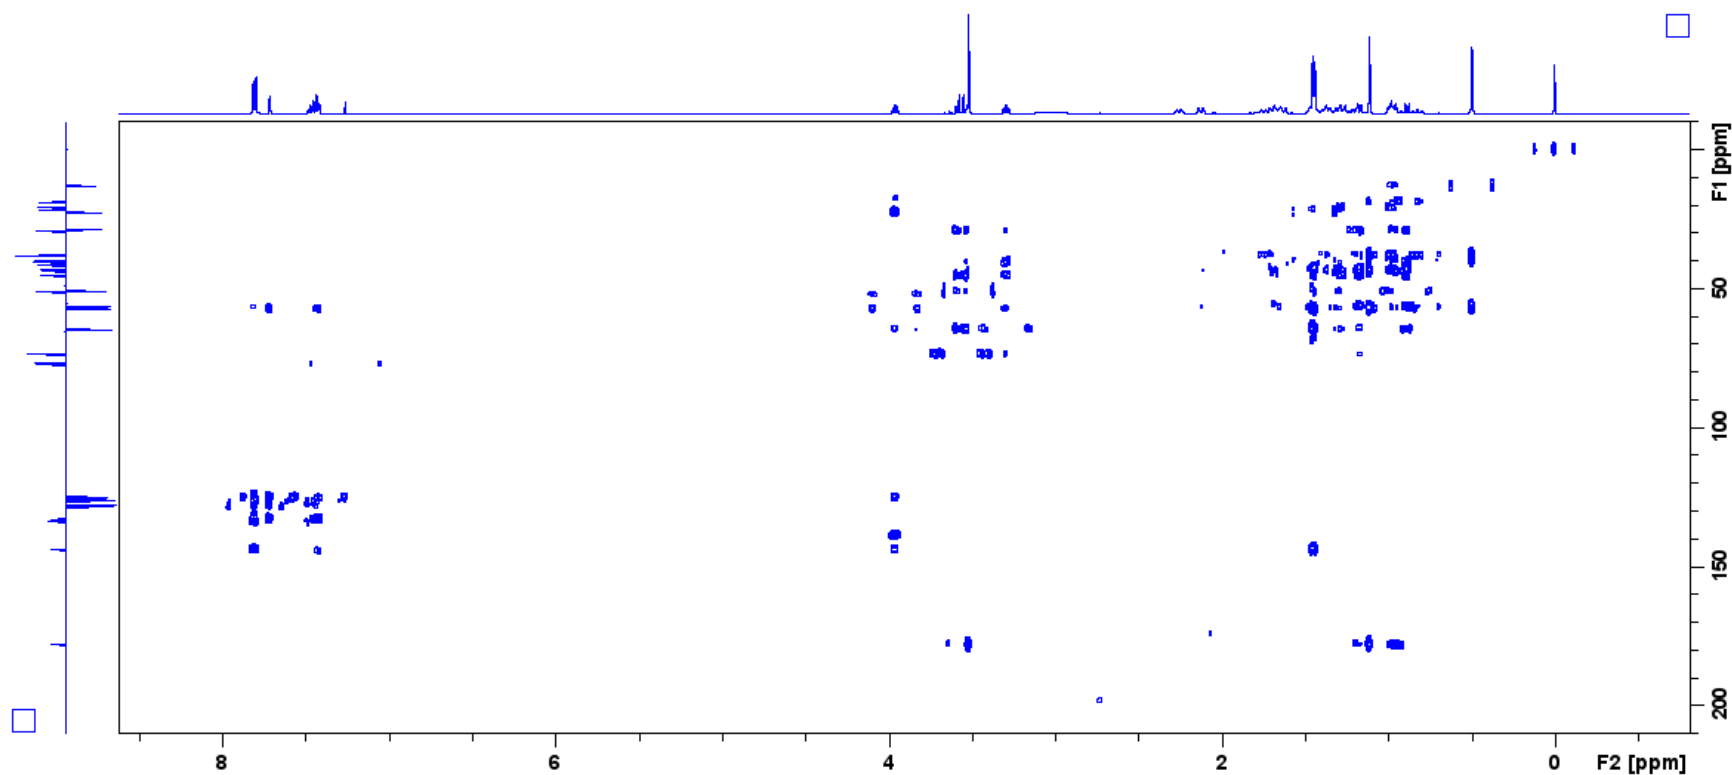



$^1\text{H}$ -NMR of compound (4*R*,4*aS*,6*aR*,8*R*,9*R*,11*aR*,11*bS*)-methyl 9-(hydroxymethyl)-4,11*b*-dimethyl-8-(((*R*)-1-(naphthalen-2-yl)ethyl)amino)tetradecahydro-6*a*,9-methanocyclohepta[*a*]naphthalene-4-carboxylate (**17**)

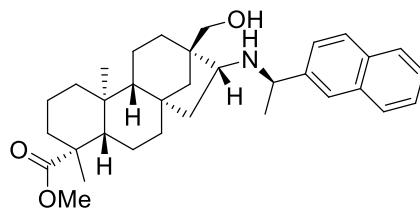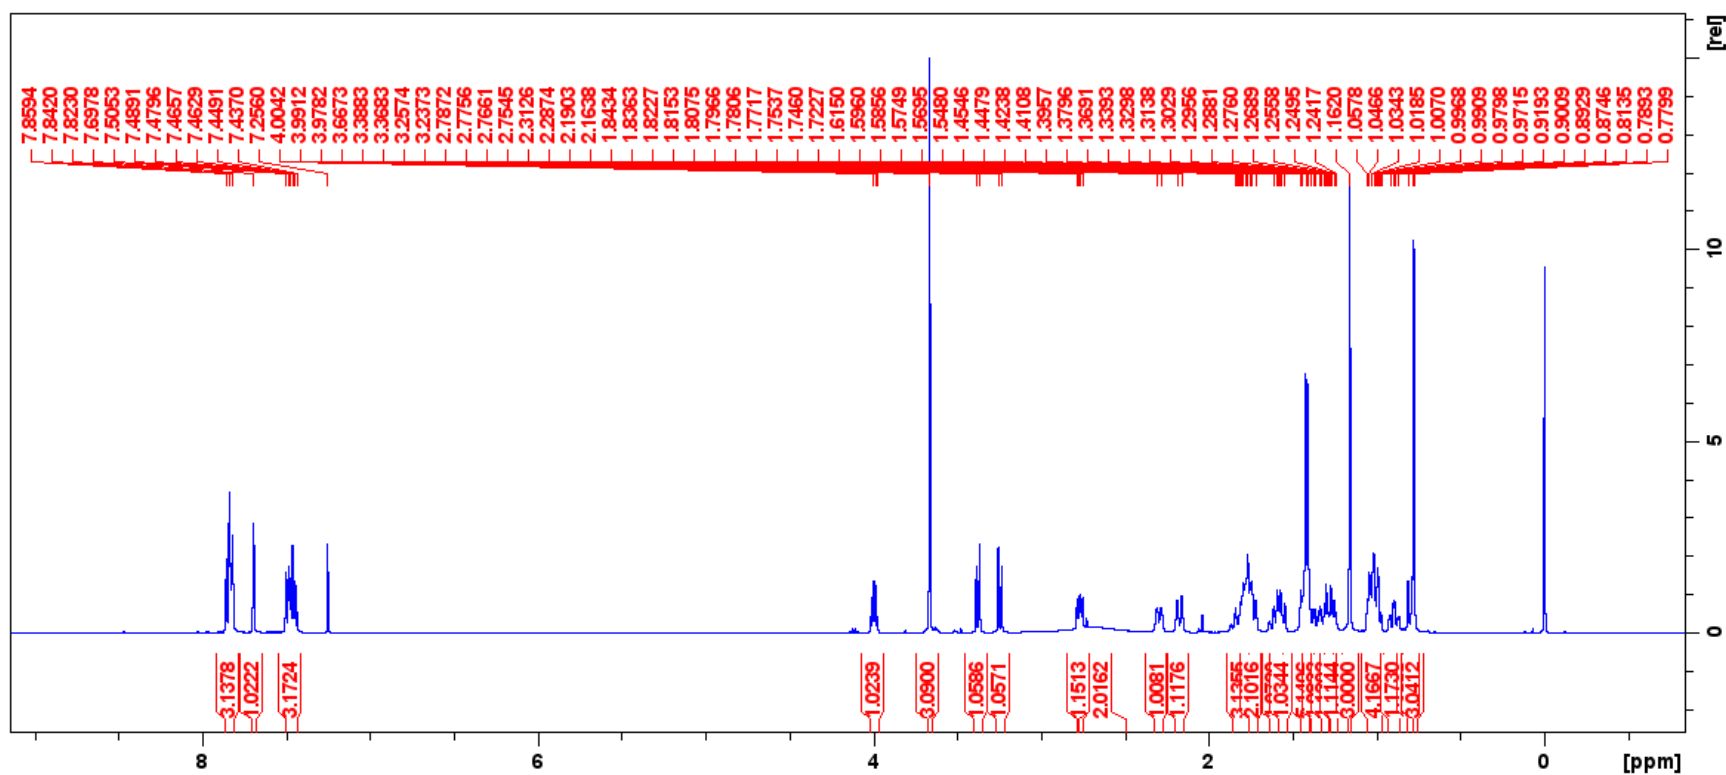

$^{13}\text{C}$ -NMR of compound (4*R*,4*aS*,6*aR*,8*R*,9*R*,11*aR*,11*bS*)-methyl 9-(hydroxymethyl)-4,11*b*-dimethyl-8-(((*R*)-1-(naphthalen-2-yl)ethyl)amino)tetradecahydro-6*a*,9-methanocyclohepta[*a*]naphthalene-4-carboxylate (**17**)

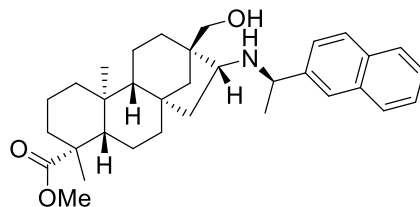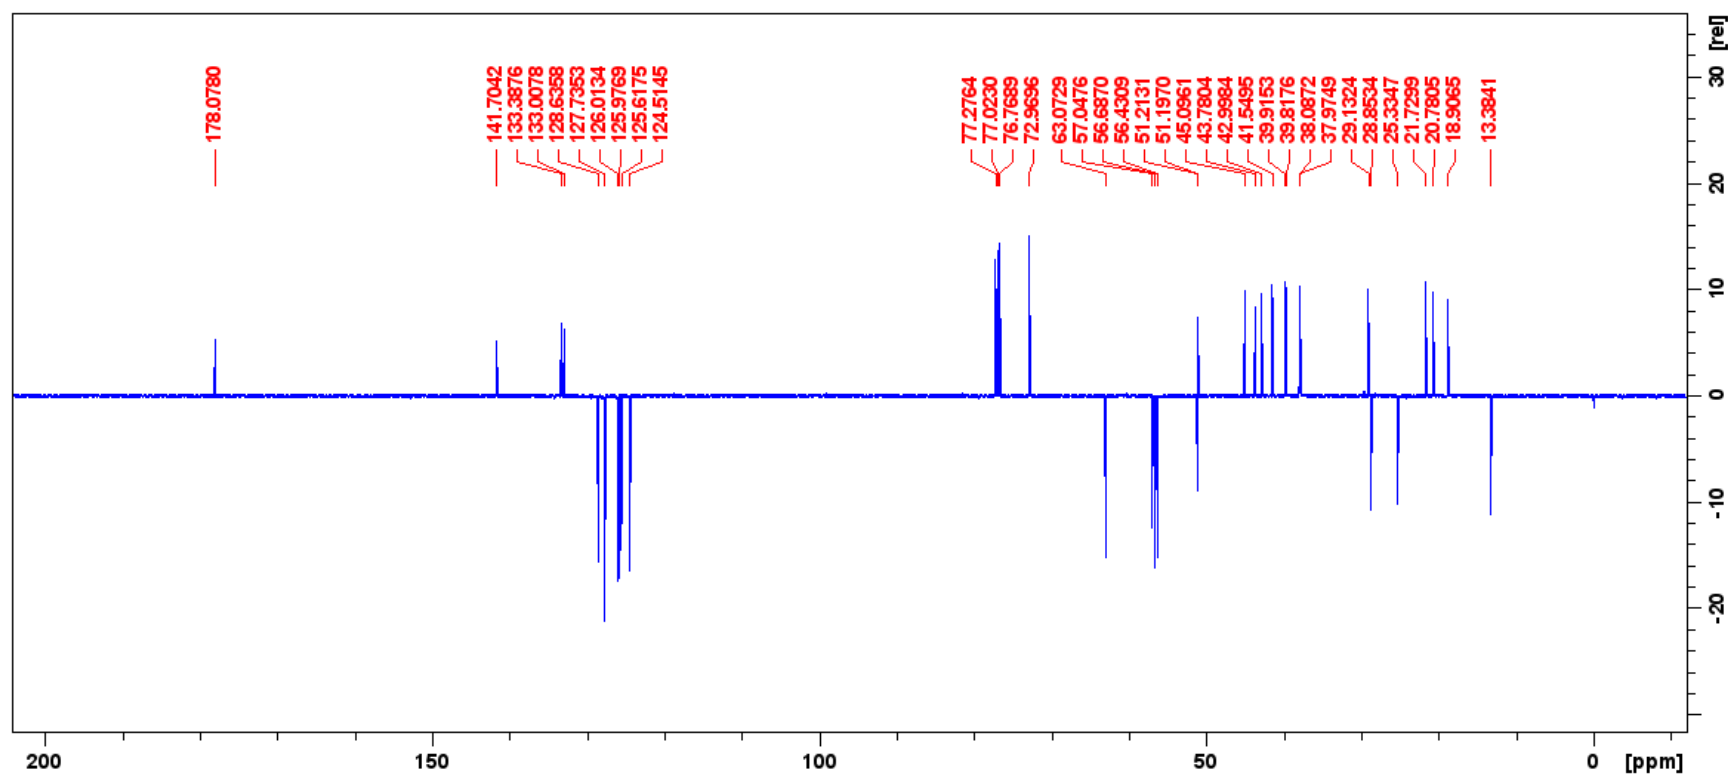

COSY of compound (4*R*,4*aS*,6*aR*,8*R*,9*R*,11*aR*,11*bS*)-methyl 9-(hydroxymethyl)-4,11*b*-dimethyl-8-(((*R*)-1-(naphthalen-2-yl)ethyl)amino)tetradecahydro-6*a*,9-methanocyclohepta[*a*]naphthalene-4-carboxylate (**17**)

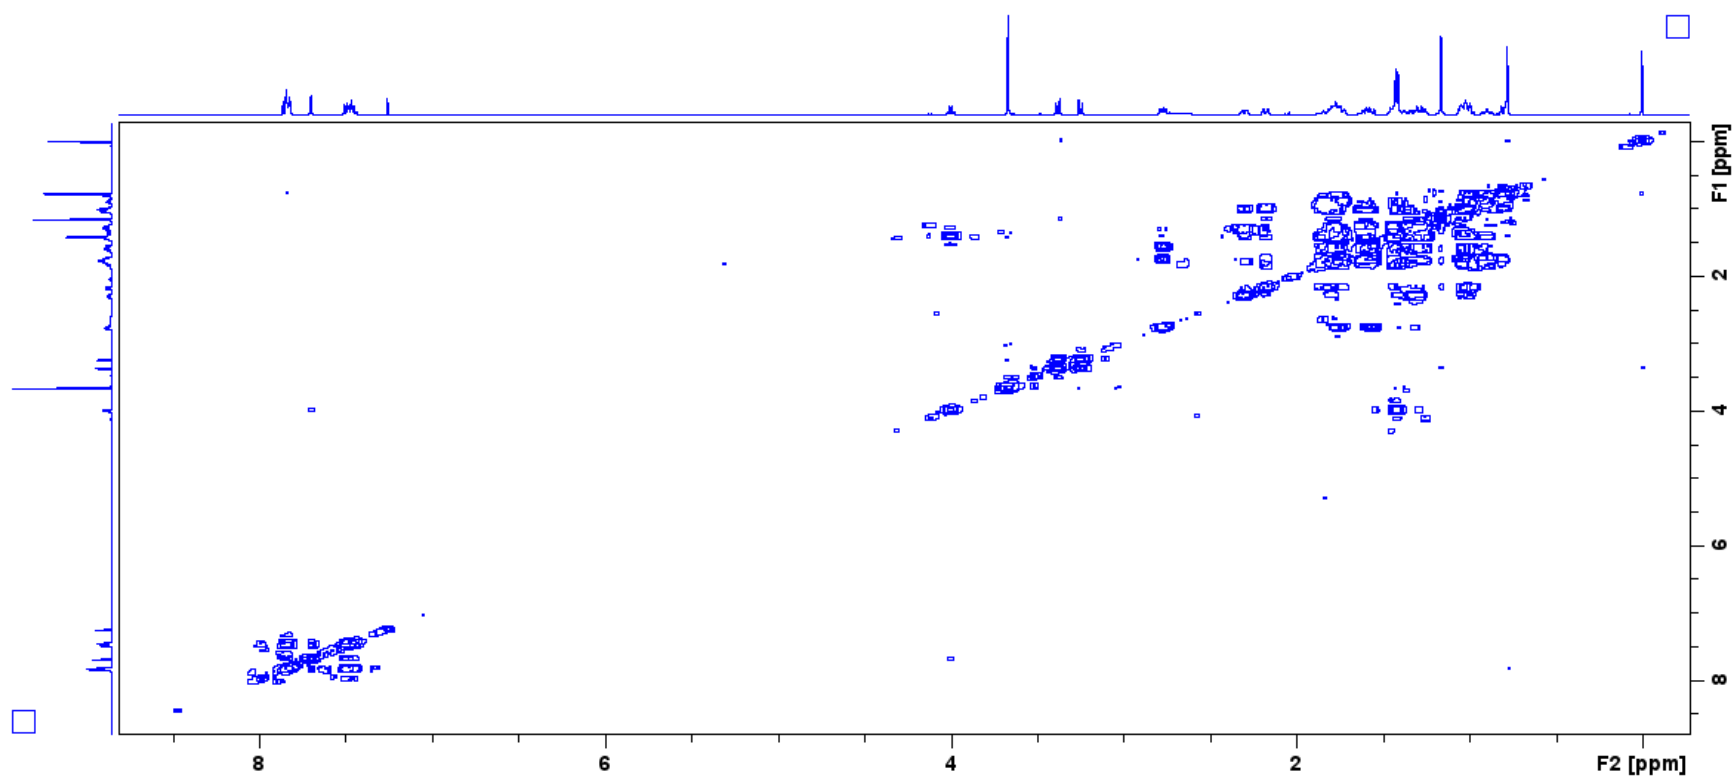

NOESY of compound (4*R*,4*aS*,6*aR*,8*R*,9*R*,11*aR*,11*bS*)-methyl 9-(hydroxymethyl)-4,11*b*-dimethyl-8-(((*R*)-1-(naphthalen-2-yl)ethyl)amino)tetradecahydro-6*a*,9-methanocyclohepta[*a*]naphthalene-4-carboxylate (**17**)

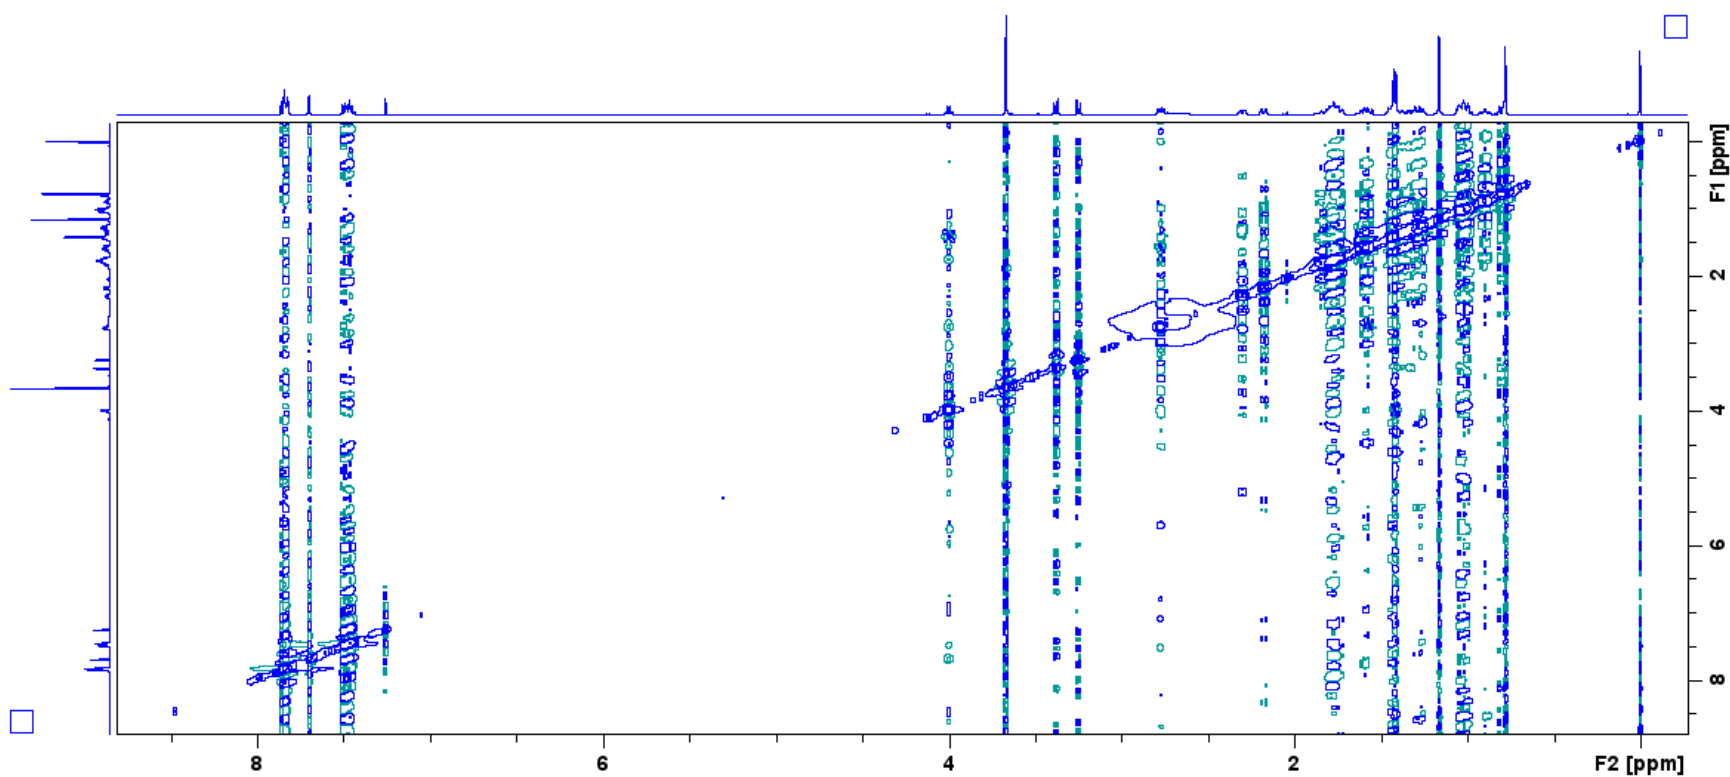

HSQC of compound (4*R*,4*aS*,6*aR*,8*R*,9*R*,11*aR*,11*bS*)-methyl 9-(hydroxymethyl)-4,11*b*-dimethyl-8-(((*R*)-1-(naphthalen-2-yl)ethyl)amino)tetradecahydro-6*a*,9-methanocyclohepta[*a*]naphthalene-4-carboxylate (**17**)

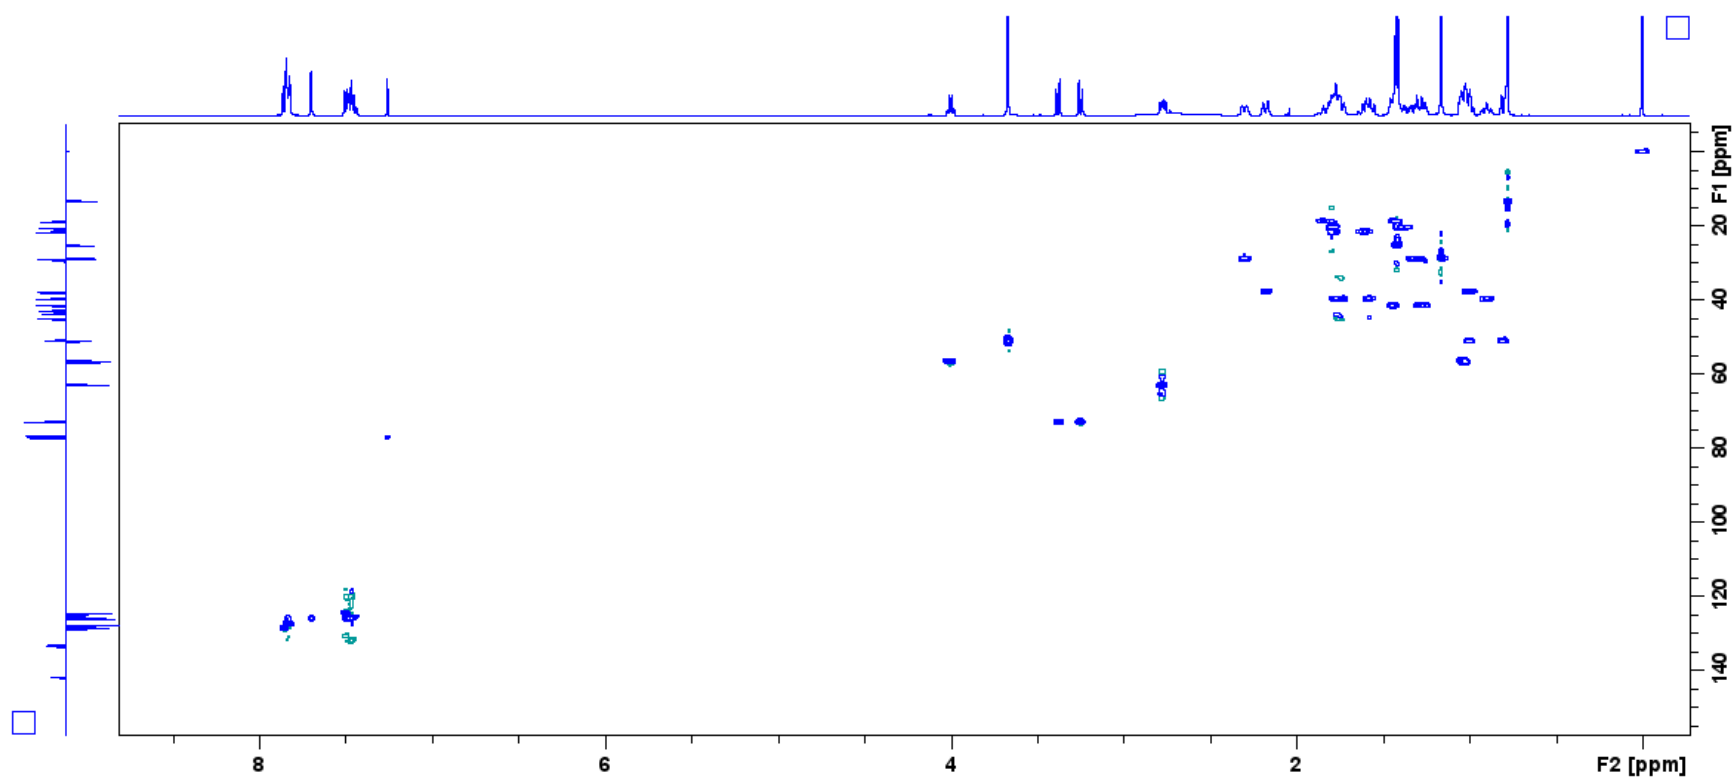

HMBC of compound (4*R*,4*aS*,6*aR*,8*R*,9*R*,11*aR*,11*bS*)-methyl 9-(hydroxymethyl)-4,11*b*-dimethyl-8-(((*R*)-1-(naphthalen-2-yl)ethyl)amino)tetradecahydro-6*a*,9-methanocyclohepta[*a*]naphthalene-4-carboxylate (**17**)

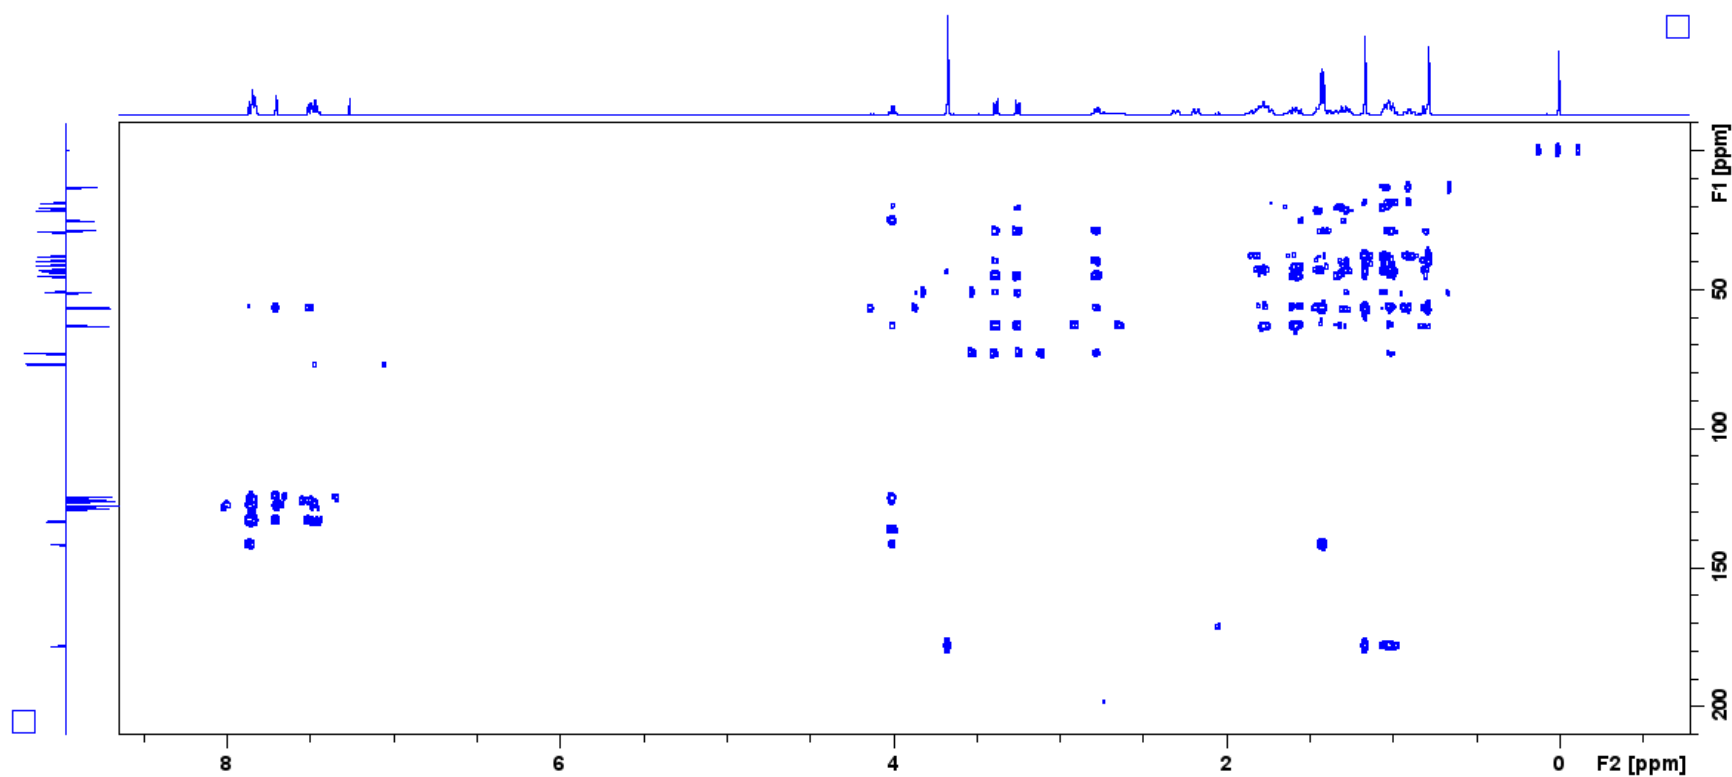

$^1\text{H}$ -NMR of compound (4*R*,4*aS*,6*aR*,9*S*,11*aR*,11*bS*)-methyl 4,11*b*-dimethyl-9-(((methylsulfonyl)oxy)methyl)-8-oxotetradecaahydro-6*a*,9-methanocyclohepta[*a*]naphthalene-4-carboxylate (**18**)

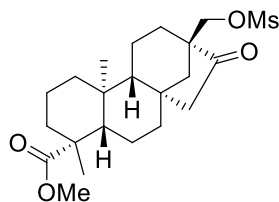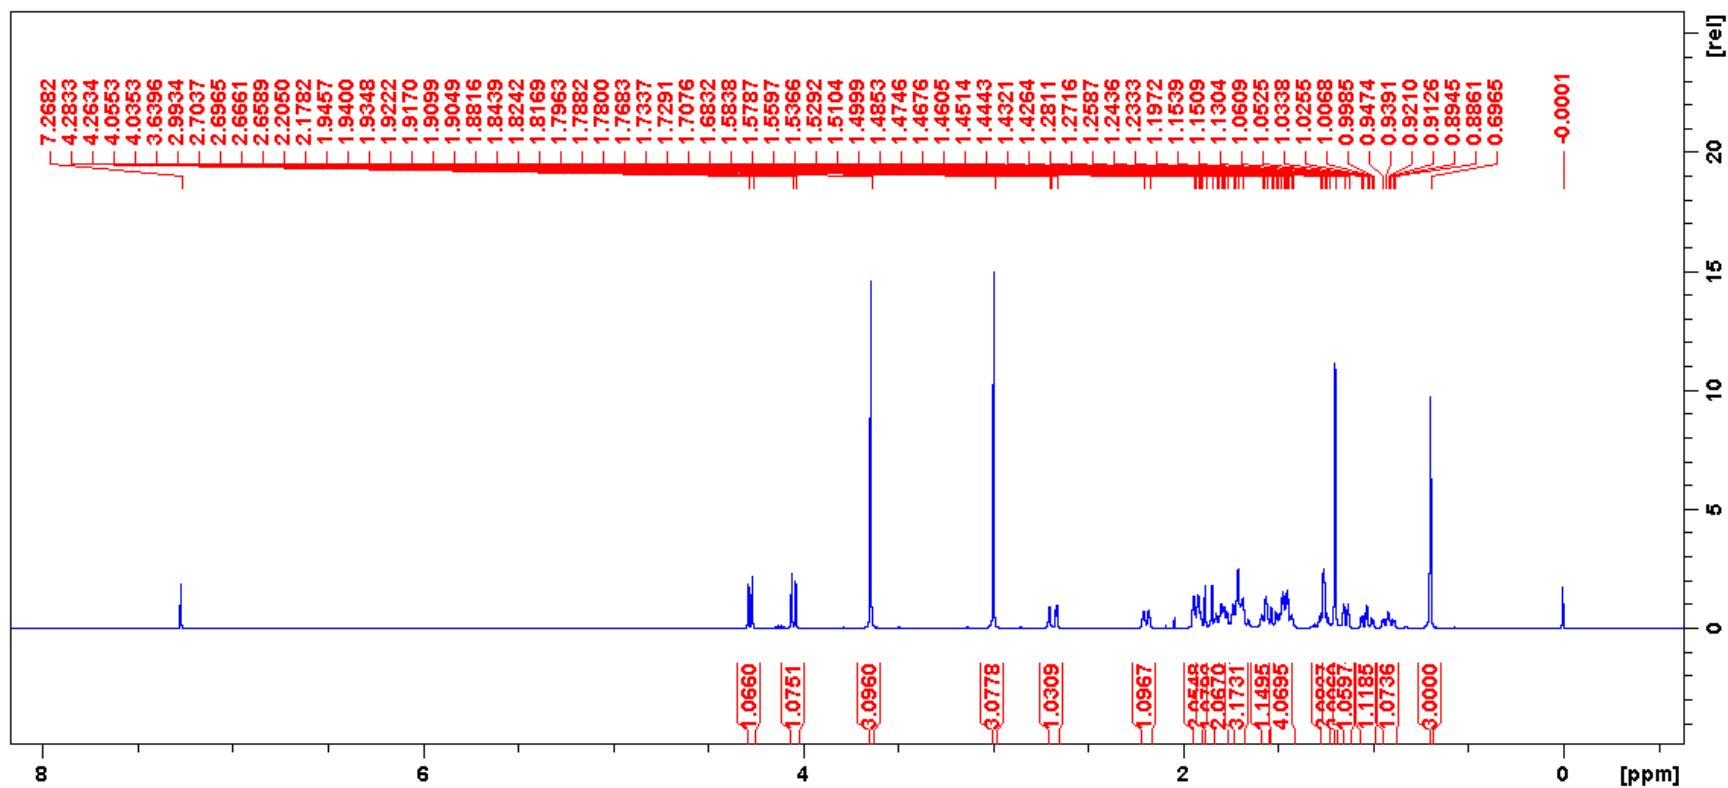

$^{13}\text{C}$ -NMR of compound (4*R*,4*aS*,6*aR*,9*S*,11*aR*,11*bS*)-methyl 4,11*b*-dimethyl-9-(((methylsulfonyl)oxy)methyl)-8-oxotetradecahydro-6*a*,9-methanocyclohepta[*a*]naphthalene-4-carboxylate (**18**)

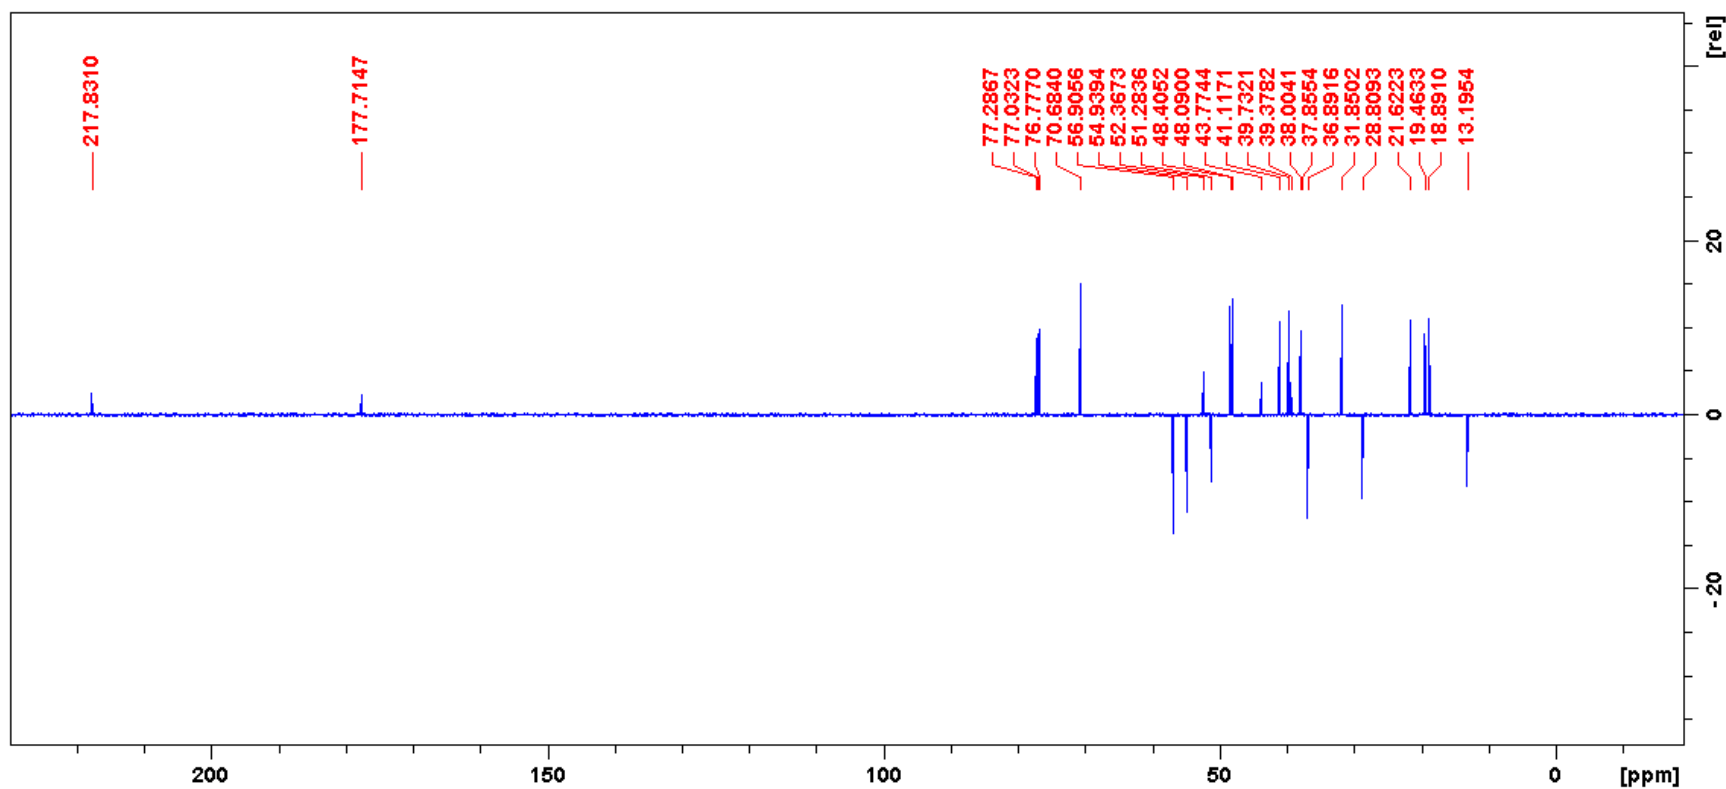



COSY of compound (4*R*,4*aS*,6*aR*,9*S*,11*aR*,11*bS*)-methyl 4,11*b*-dimethyl-9-(((methylsulfonyl)oxy)methyl)-8-oxotetradecahydro-6*a*,9-methanocyclohepta[*a*]naphthalene-4-carboxylate (**18**)

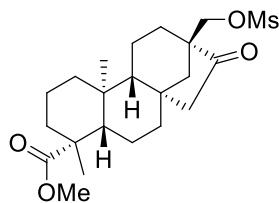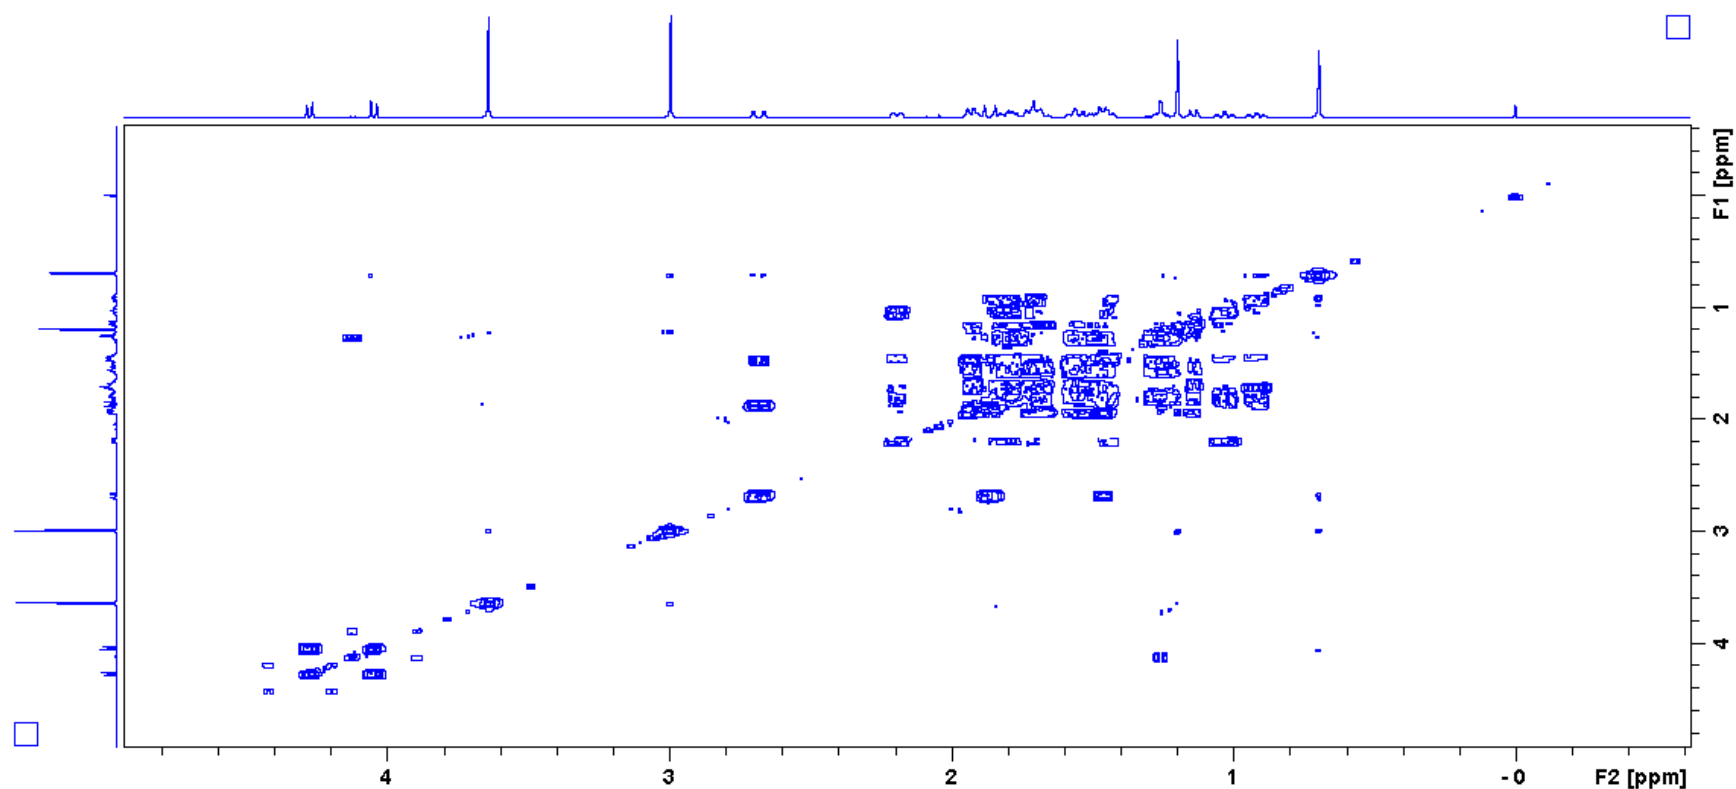

NOESY of compound (4*R*,4*aS*,6*aR*,9*S*,11*aR*,11*bS*)-methyl 4,11*b*-dimethyl-9-(((methylsulfonyl)oxy)methyl)-8-oxotetradecahydro-6*a*,9-methanocyclohepta[*a*]naphthalene-4-carboxylate (**18**)

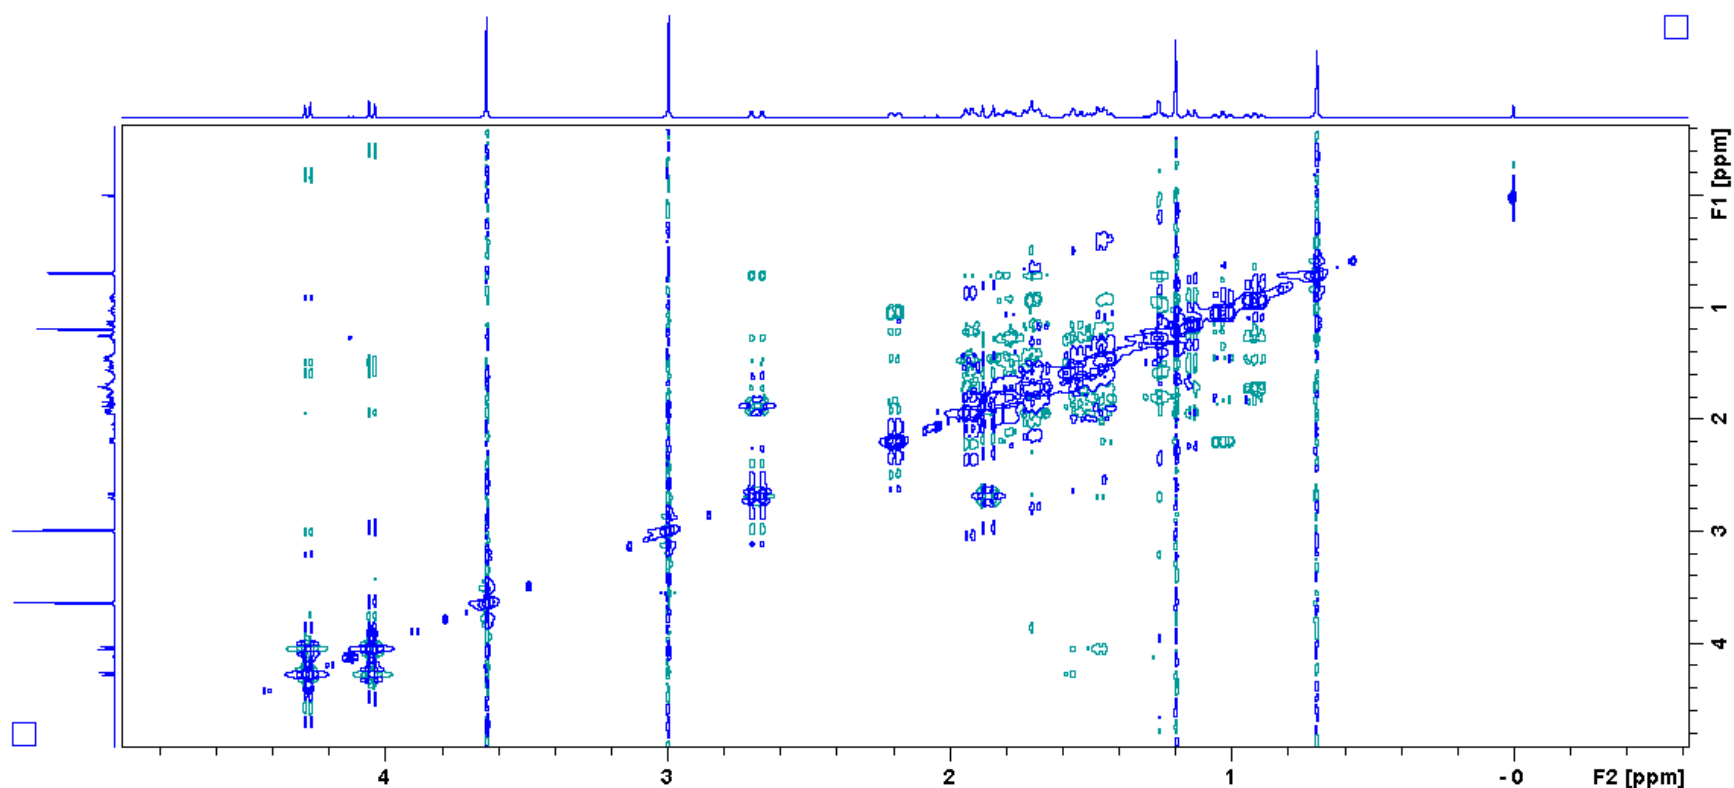

HSQC of compound (4*R*,4*aS*,6*aR*,9*S*,11*aR*,11*bS*)-methyl 4,11b-dimethyl-9-(((methylsulfonyl)oxy)methyl)-8-oxotetradecahydro-6*a*,9-methanocyclohepta[*a*]naphthalene-4-carboxylate (**18**)

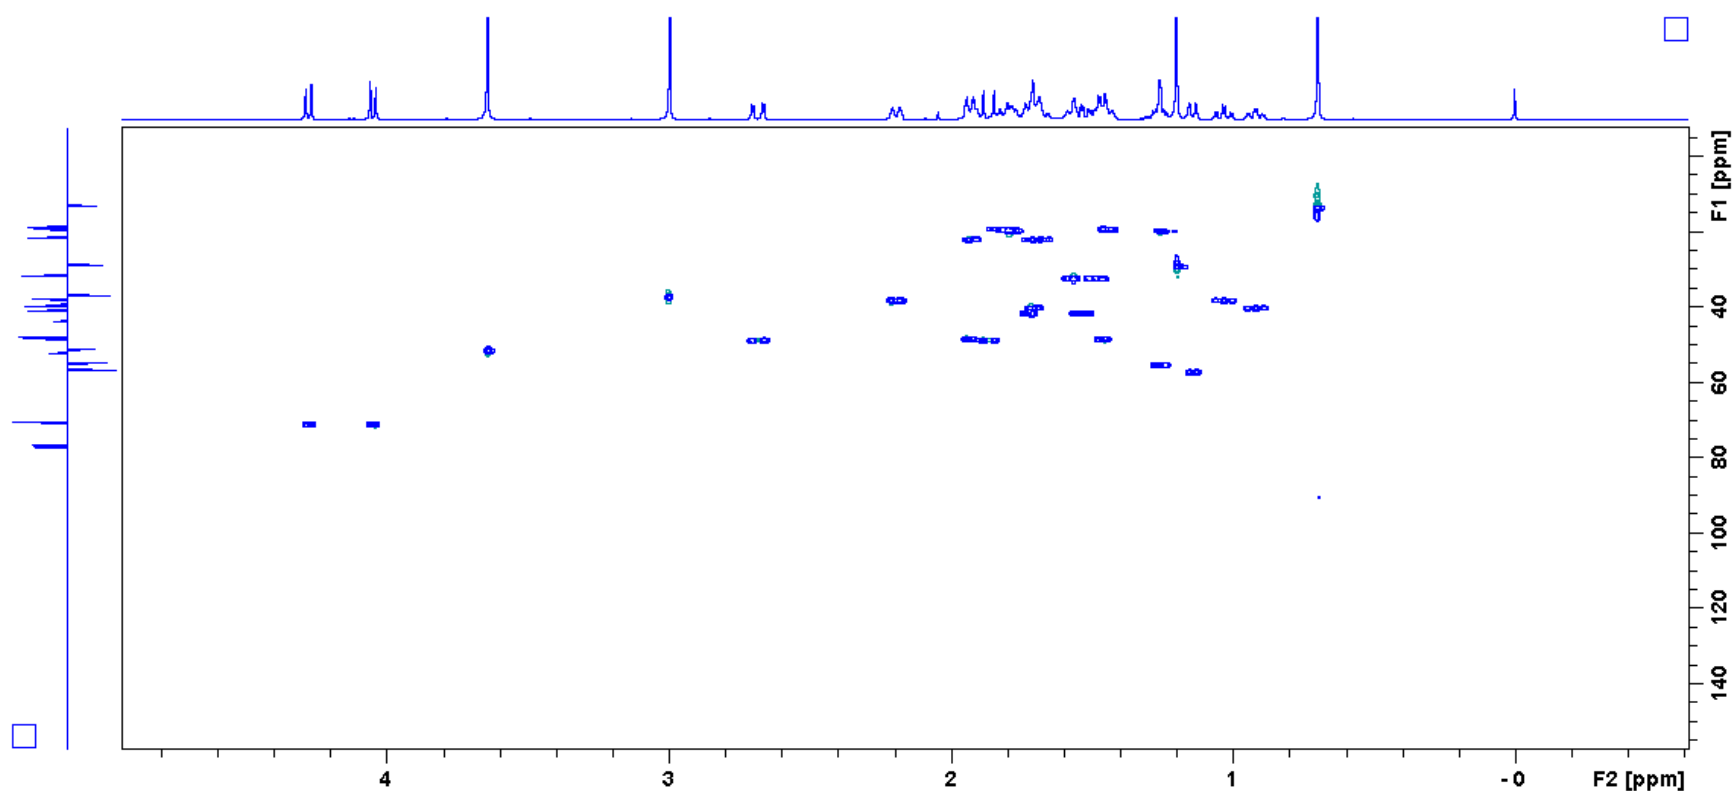

HMBC of compound (4*R*,4*aS*,6*aR*,9*S*,11*aR*,11*bS*)-methyl 4,11*b*-dimethyl-9-(((methylsulfonyl)oxy)methyl)-8-oxotetradecahydro-6*a*,9-methanocyclohepta[*a*]naphthalene-4-carboxylate (**18**)

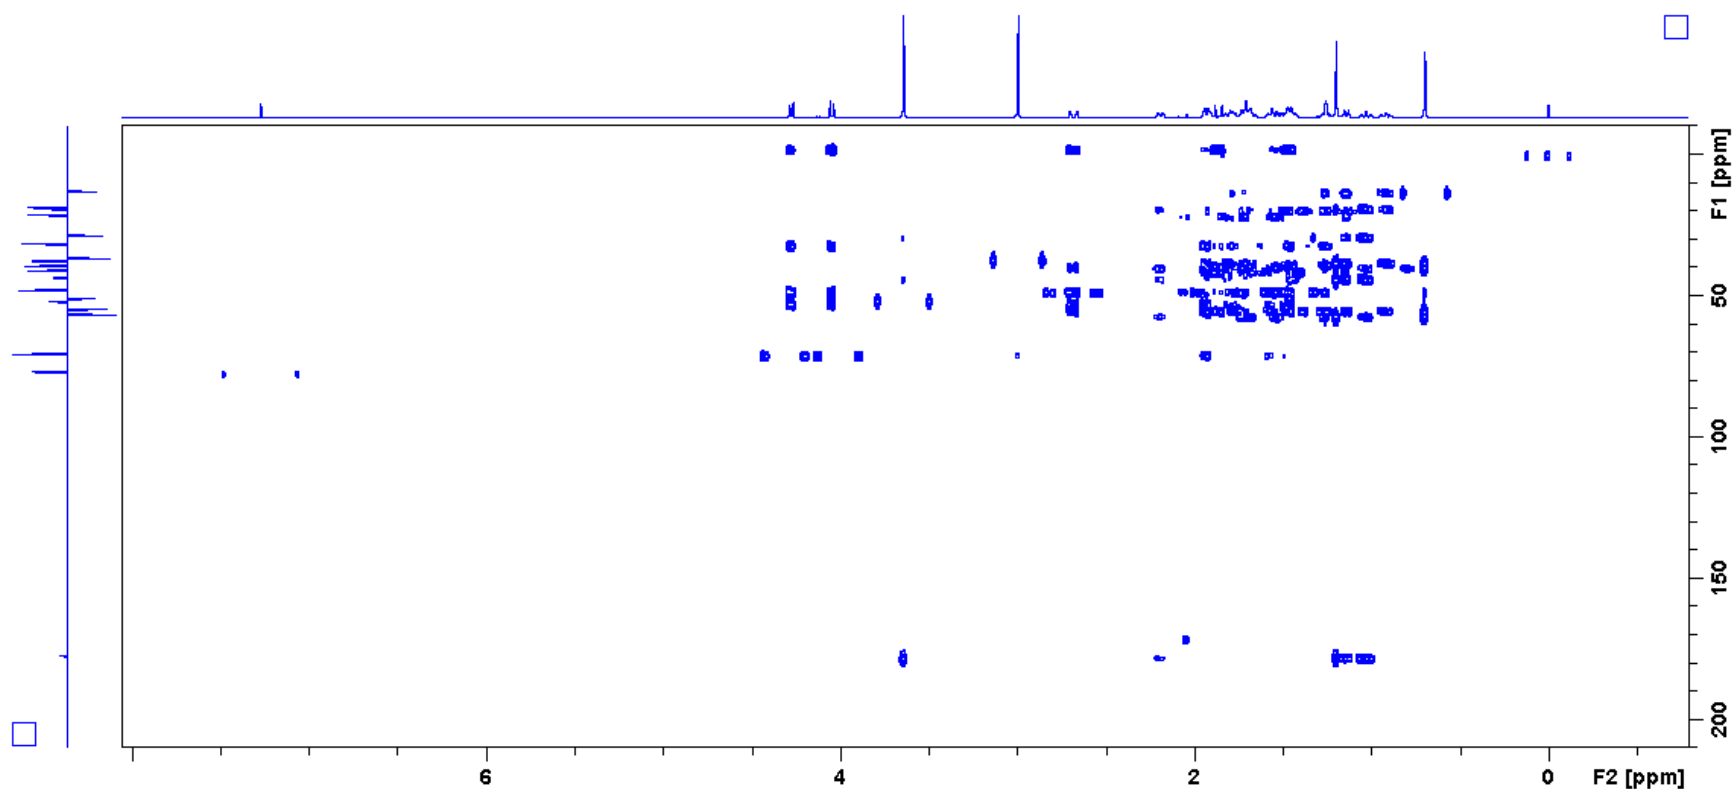

$^1\text{H}$ -NMR of compound (4*R*,4*aS*,6*aR*,9*S*,11*aR*,11*bS*)-methyl 9-(azidomethyl)-4,11*b*-dimethyl-8-oxotetradecahydro-6*a*,9-methanocyclohepta[*a*]naphthalene-4-carboxylate (**19**)

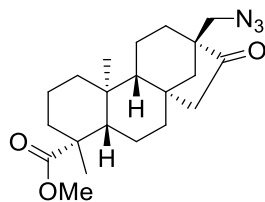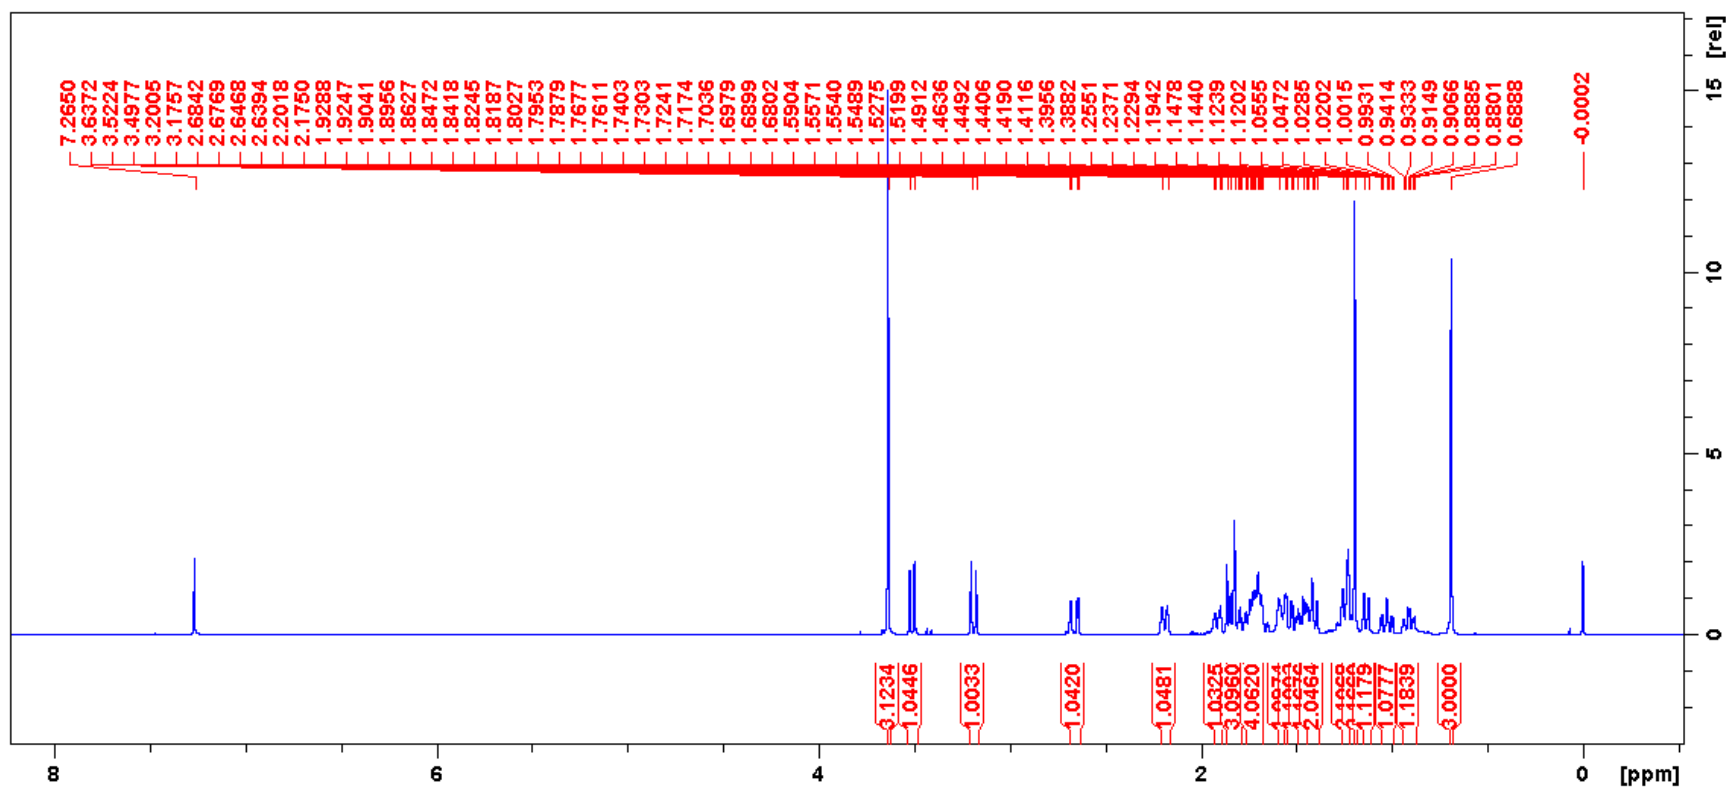

$^{13}\text{C}$ -NMR of compound (4*R*,4*aS*,6*aR*,9*S*,11*aR*,11*bS*)-methyl 9-(azidomethyl)-4,11*b*-dimethyl-8-oxotetradecahydro-6*a*,9-methanocyclohepta[*a*]naphthalene-4-carboxylate (**19**)

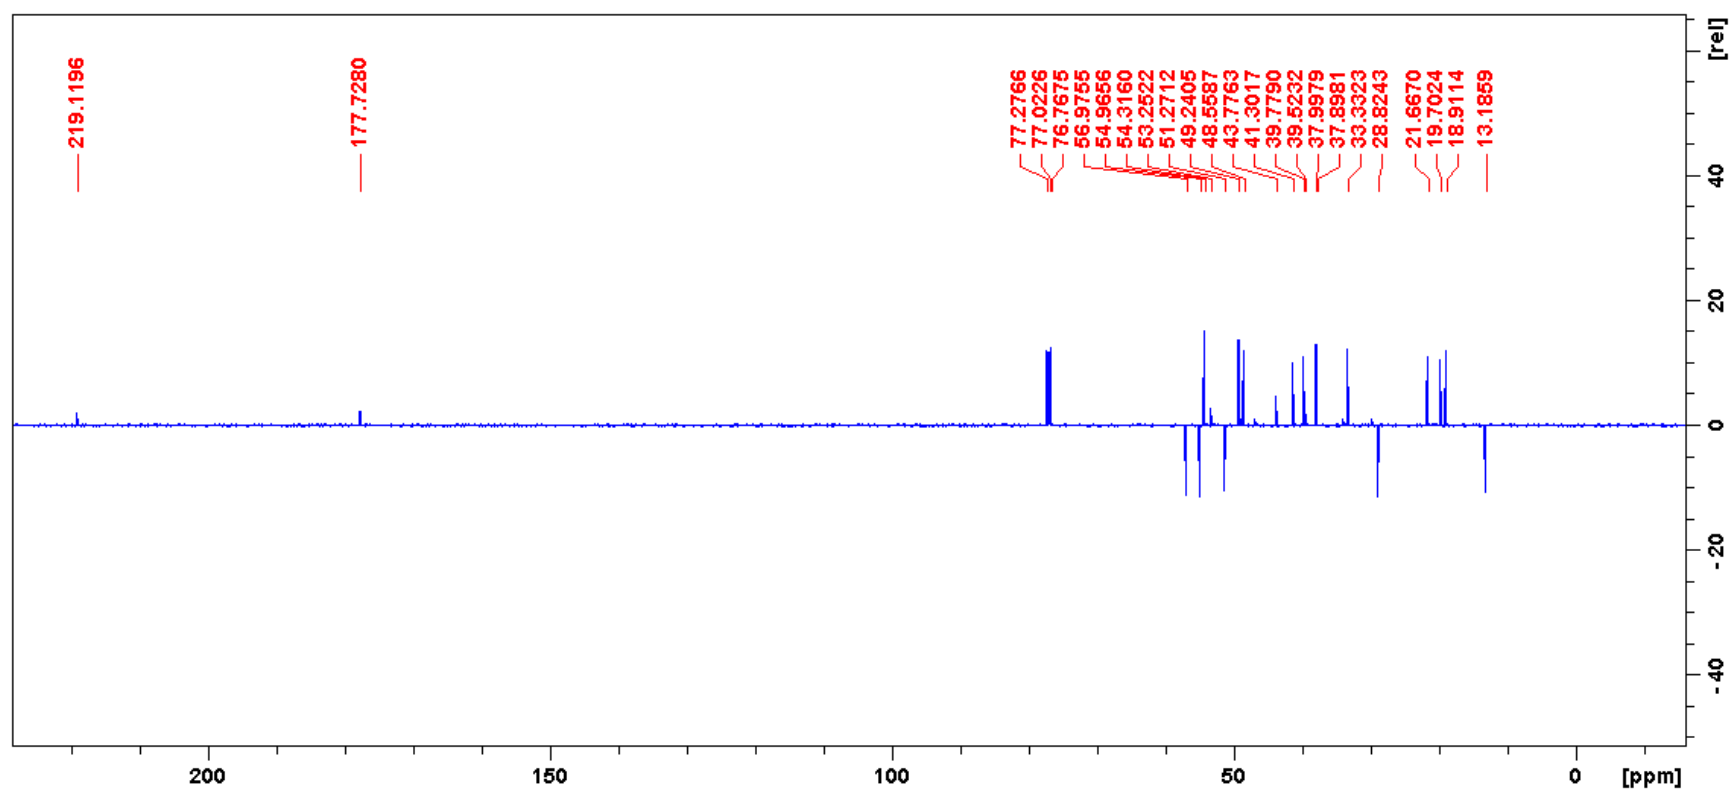

COSY of compound (4*R*,4*aS*,6*aR*,9*S*,11*aR*,11*bS*)-methyl 9-(azidomethyl)-4,11*b*-dimethyl-8-oxotetradecahydro-6*a*,9-methanocyclohepta[*a*]naphthalene-4-carboxylate (**19**)

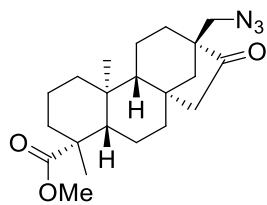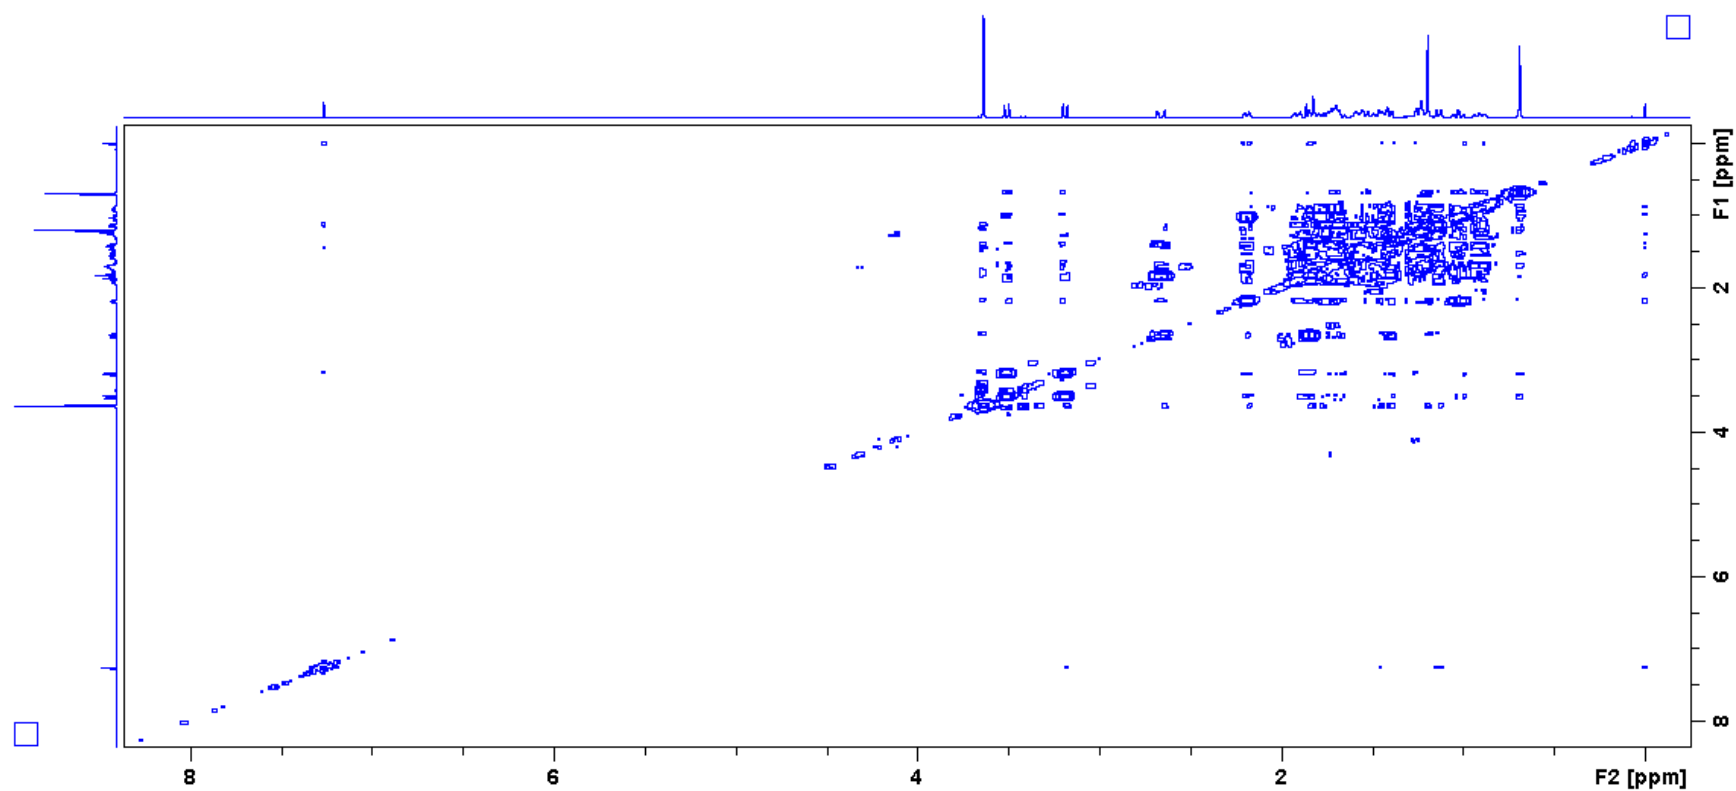

NOESY of compound (4*R*,4*aS*,6*aR*,9*S*,11*aR*,11*bS*)-methyl 9-(azidomethyl)-4,11*b*-dimethyl-8-oxotetradecahydro-6*a*,9-methanocyclohepta[*a*]naphthalene-4-carboxylate (**19**)

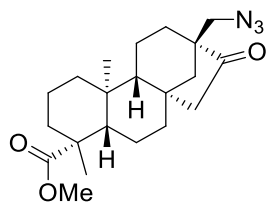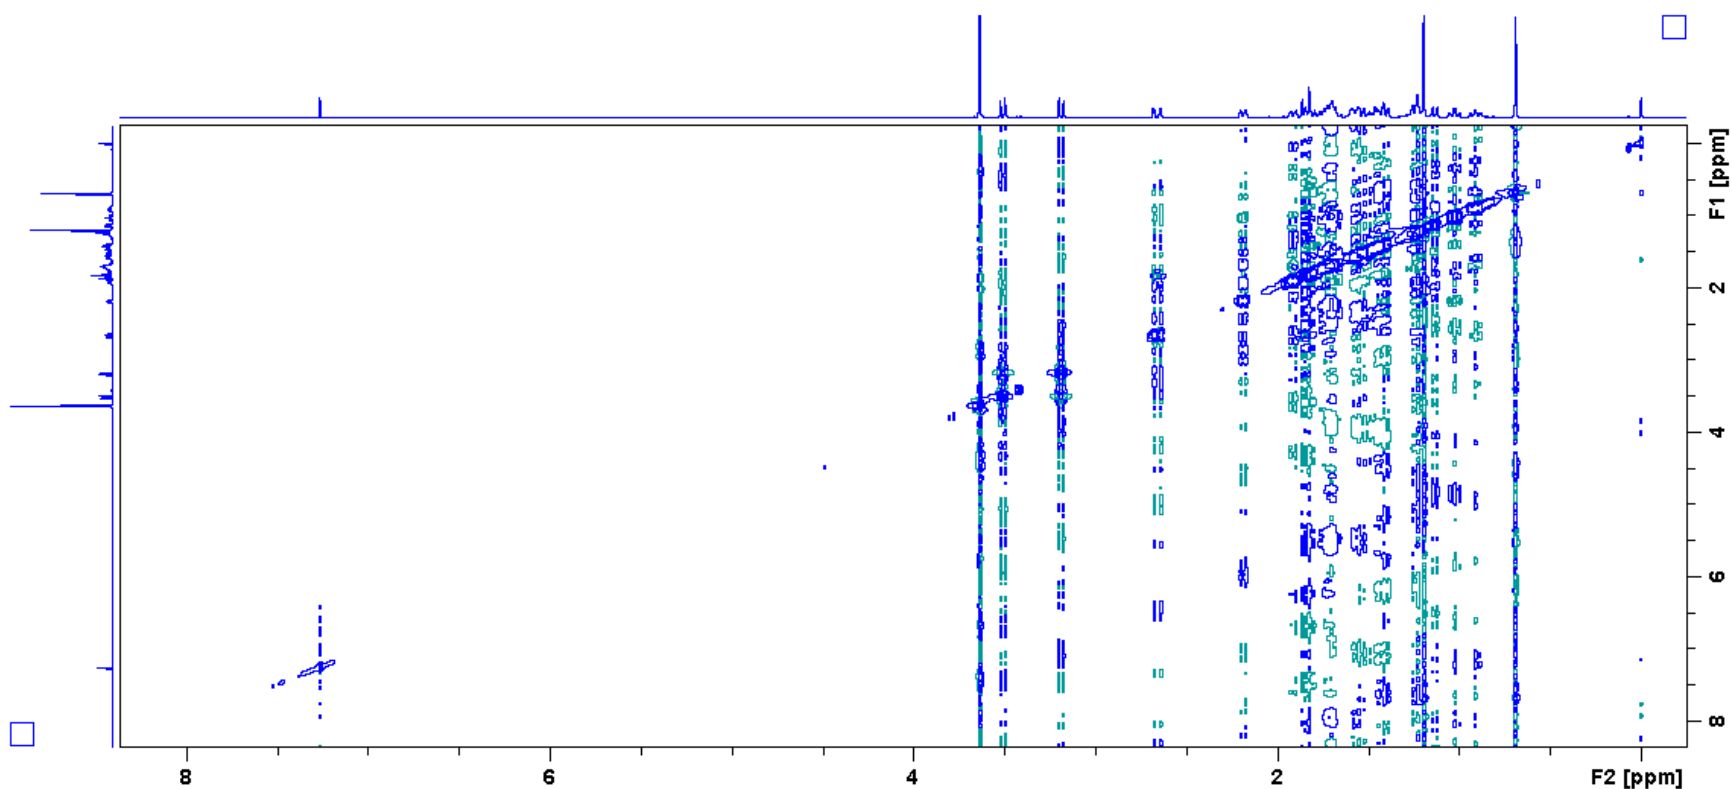



HSQC of compound (4*R*,4*aS*,6*aR*,9*S*,11*aR*,11*bS*)-methyl 9-(azidomethyl)-4,11*b*-dimethyl-8-oxotetradecahydro-6*a*,9-methanocyclohepta[*a*]naphthalene-4-carboxylate (**19**)

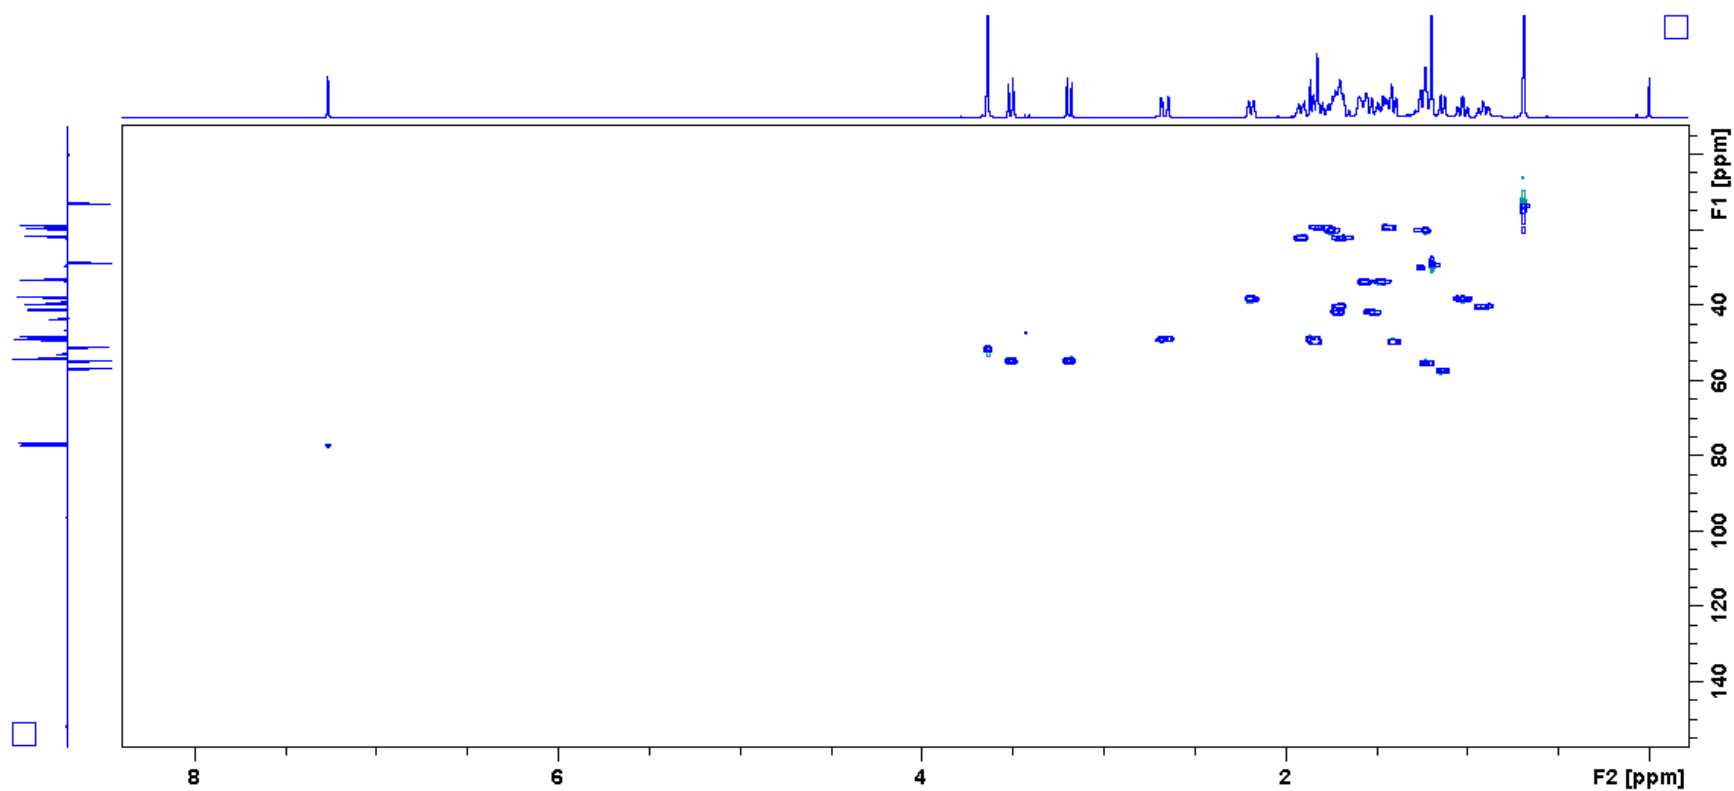

HMBC of compound (4*R*,4*aS*,6*aR*,9*S*,11*aR*,11*bS*)-methyl 9-(azidomethyl)-4,11*b*-dimethyl-8-oxotetradecahydro-6*a*,9-methanocyclohepta[*a*]naphthalene-4-carboxylate (**19**)

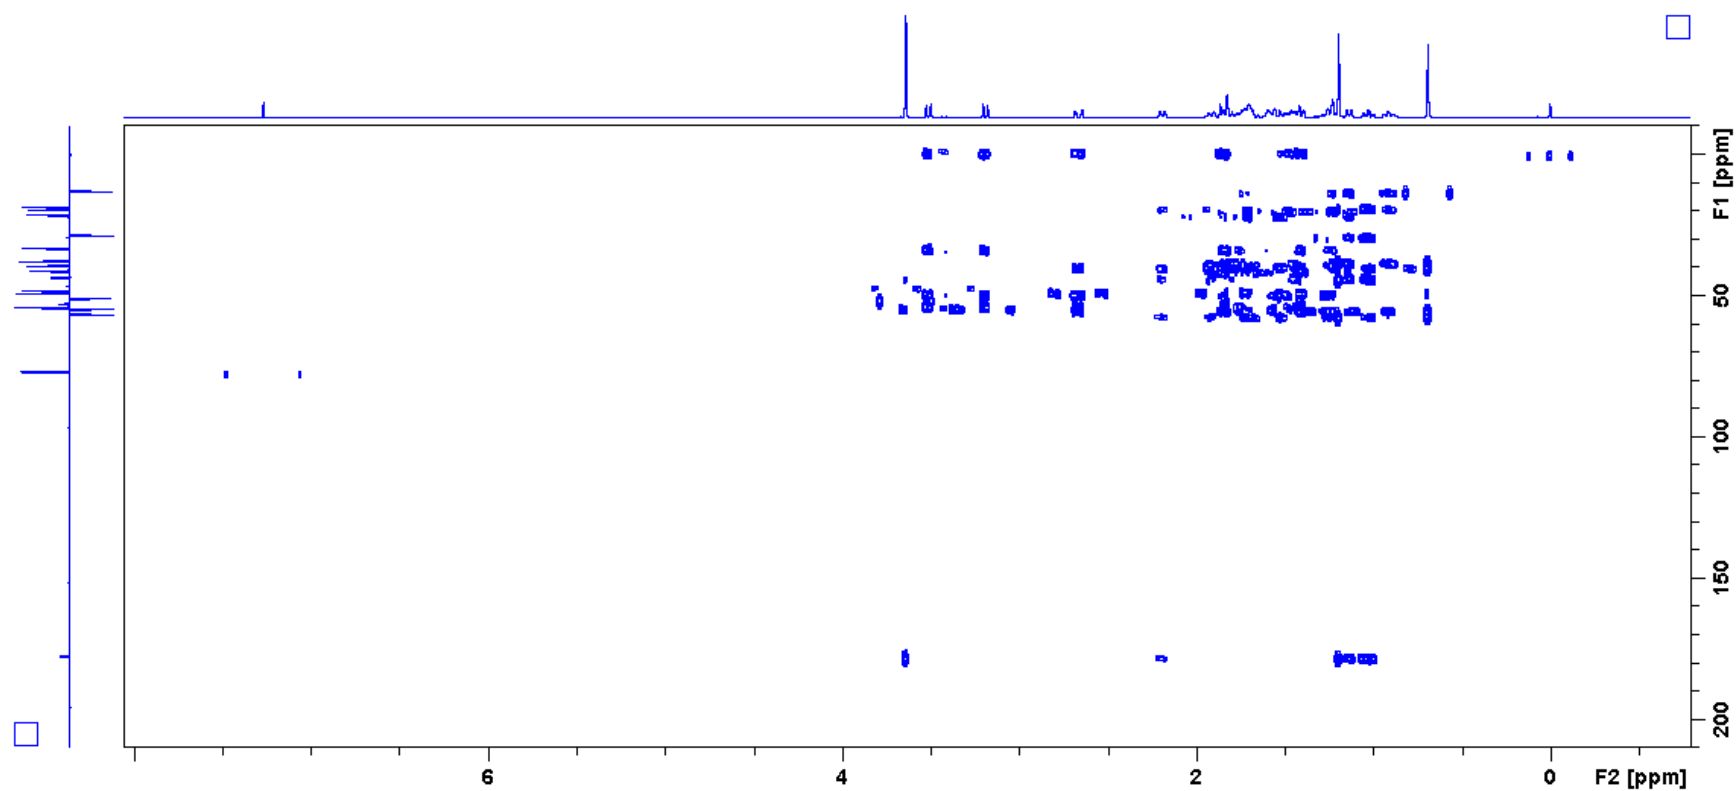

$^1\text{H}$ -NMR of compound (4*R*,4*aS*,6*aR*,8*R*,9*S*,11*aR*,11*bS*)-methyl 9-(azidomethyl)-8-hydroxy-4,11*b*-dimethyltetradecahydro-6*a*,9-methanocyclohepta[*a*]naphthalene-4-carboxylate (**20**)

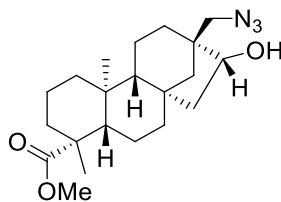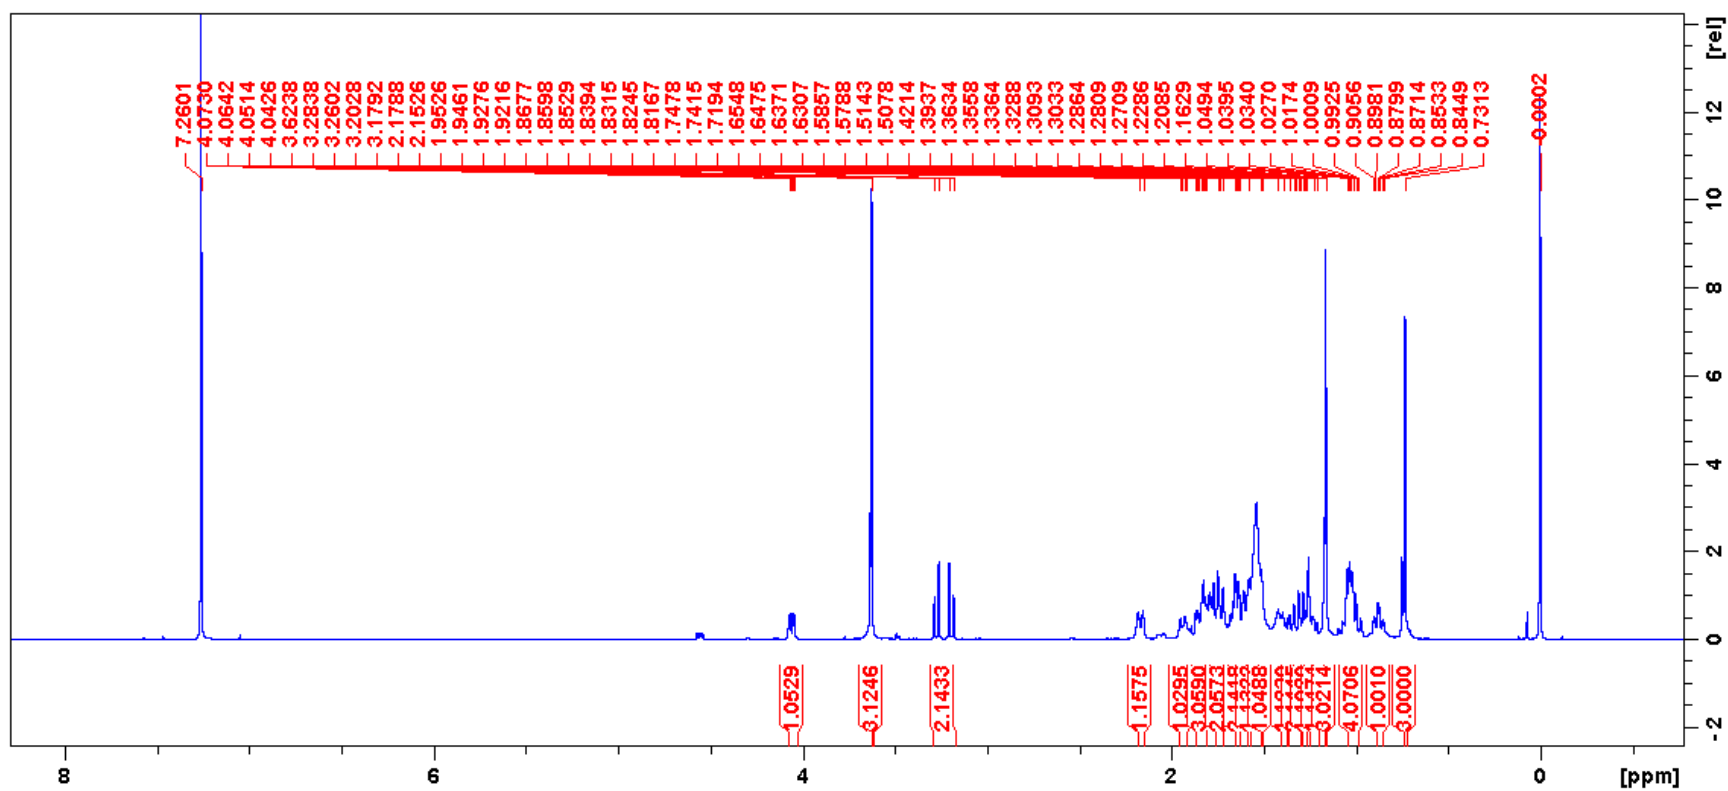

$^{13}\text{C}$ -NMR of compound (4*R*,4*aS*,6*aR*,8*R*,9*S*,11*aR*,11*bS*)-methyl 9-(azidomethyl)-8-hydroxy-4,11*b*-dimethyltetradecahydro-6*a*,9-methanocyclohepta[*a*]naphthalene-4-carboxylate (**20**)

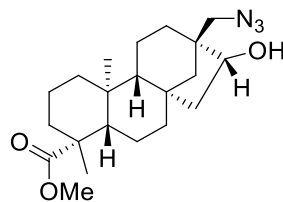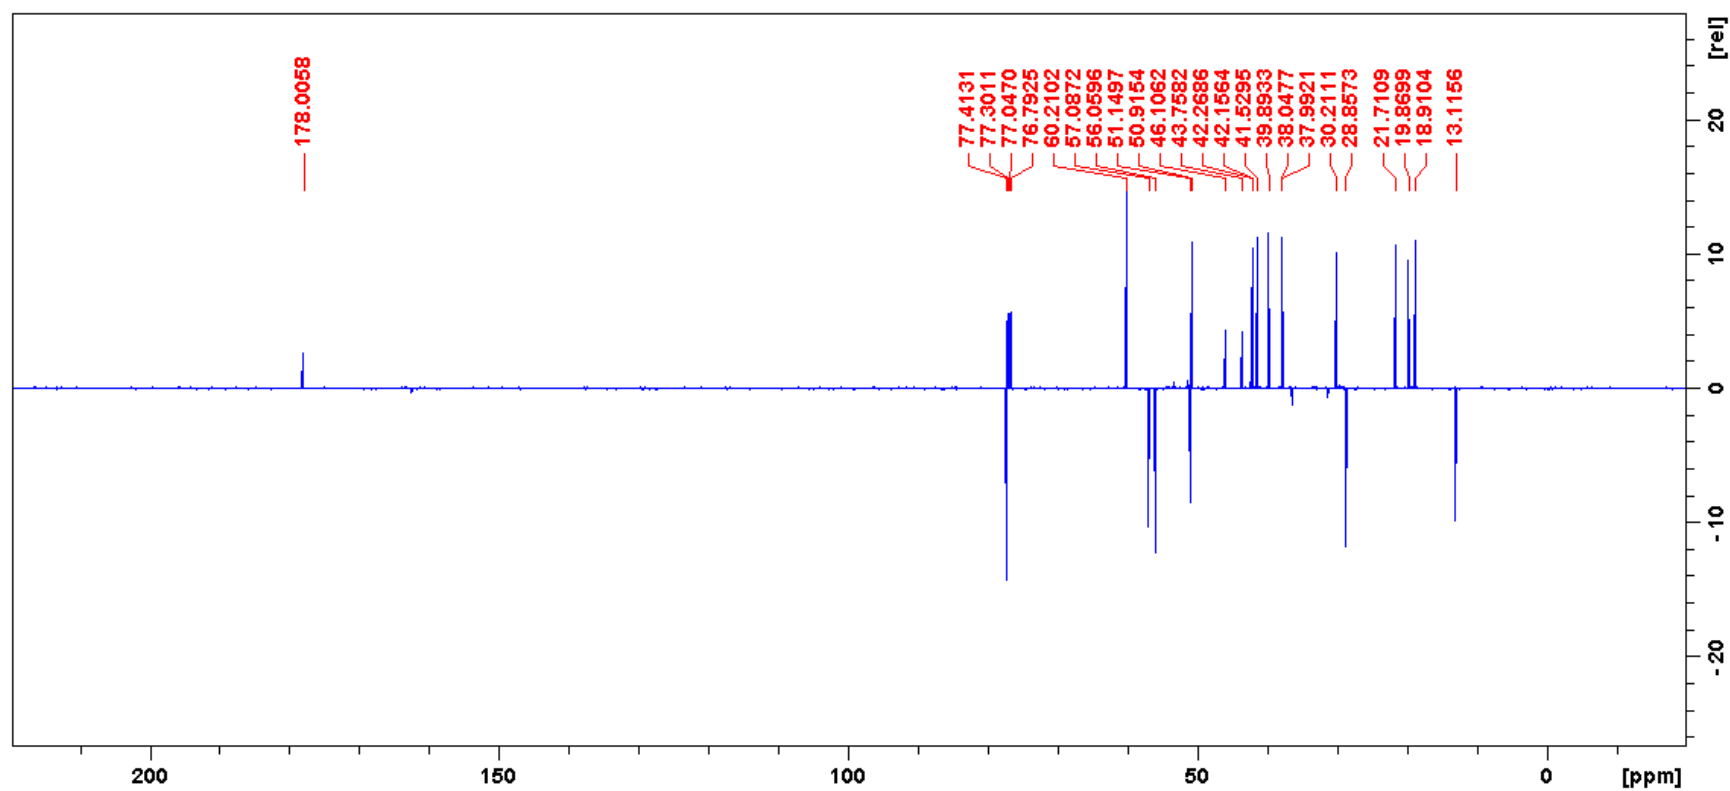

COSY of compound (4*R*,4*aS*,6*aR*,8*R*,9*S*,11*aR*,11*bS*)-methyl 9-(azidomethyl)-8-hydroxy-4,11*b*-dimethyltetradecahydro-6*a*,9-methanocyclohepta[*a*]naphthalene-4-carboxylate (**20**)

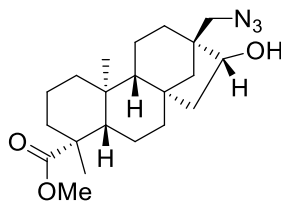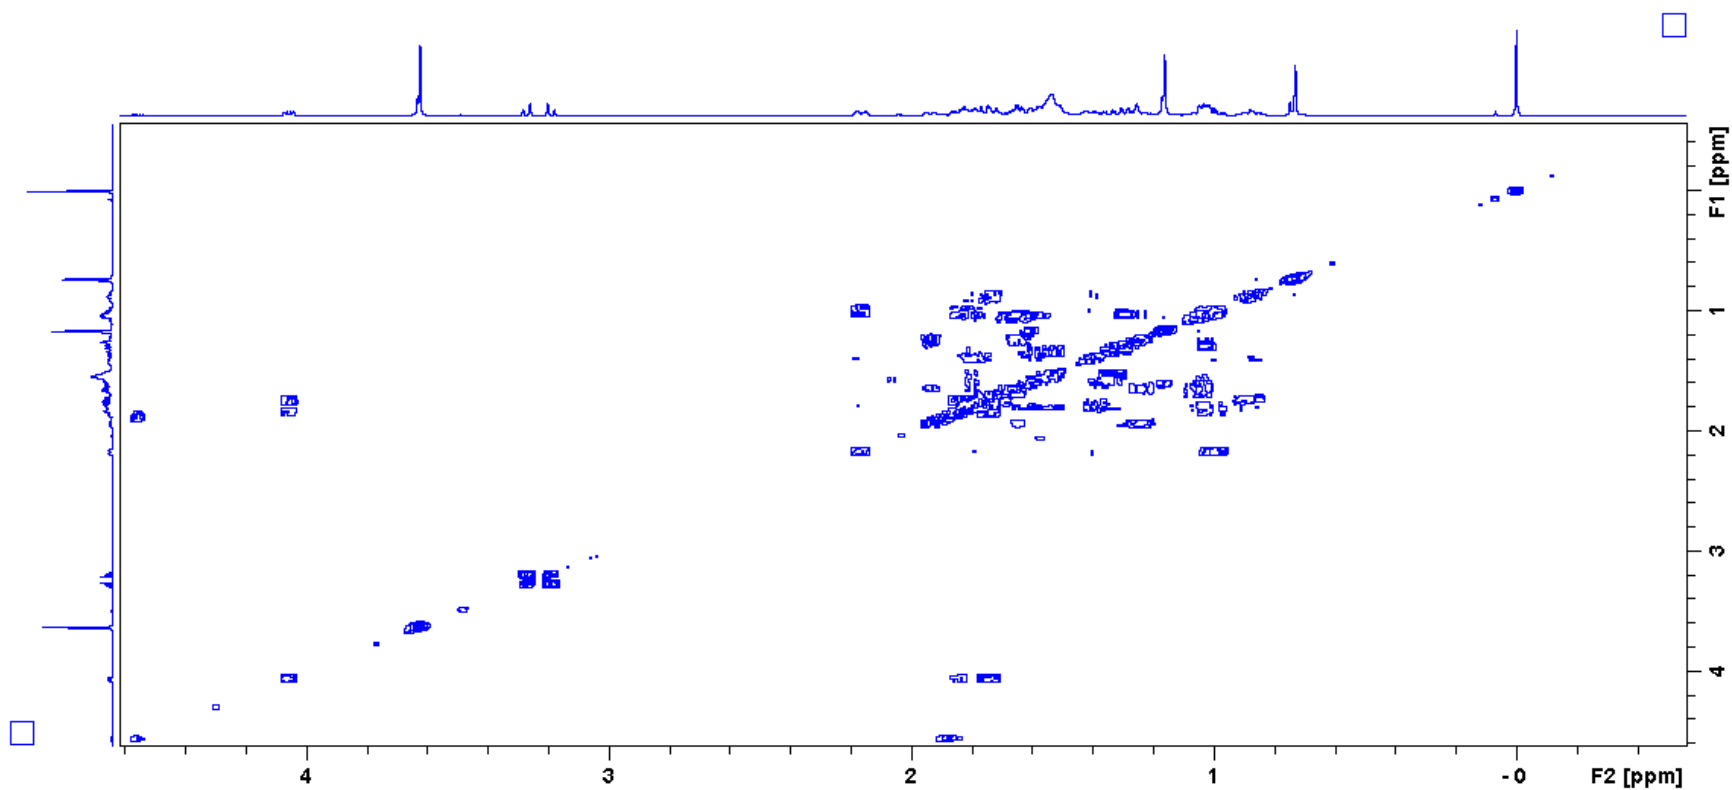

NOESY of compound (4*R*,4*aS*,6*aR*,8*R*,9*S*,11*aR*,11*bS*)-methyl 9-(azidomethyl)-8-hydroxy-4,11*b*-dimethyltetradecahydro-6*a*,9-methanocyclohepta[*a*]naphthalene-4-carboxylate (**20**)

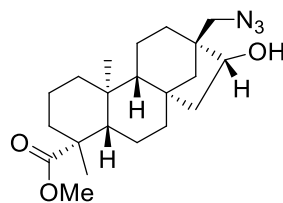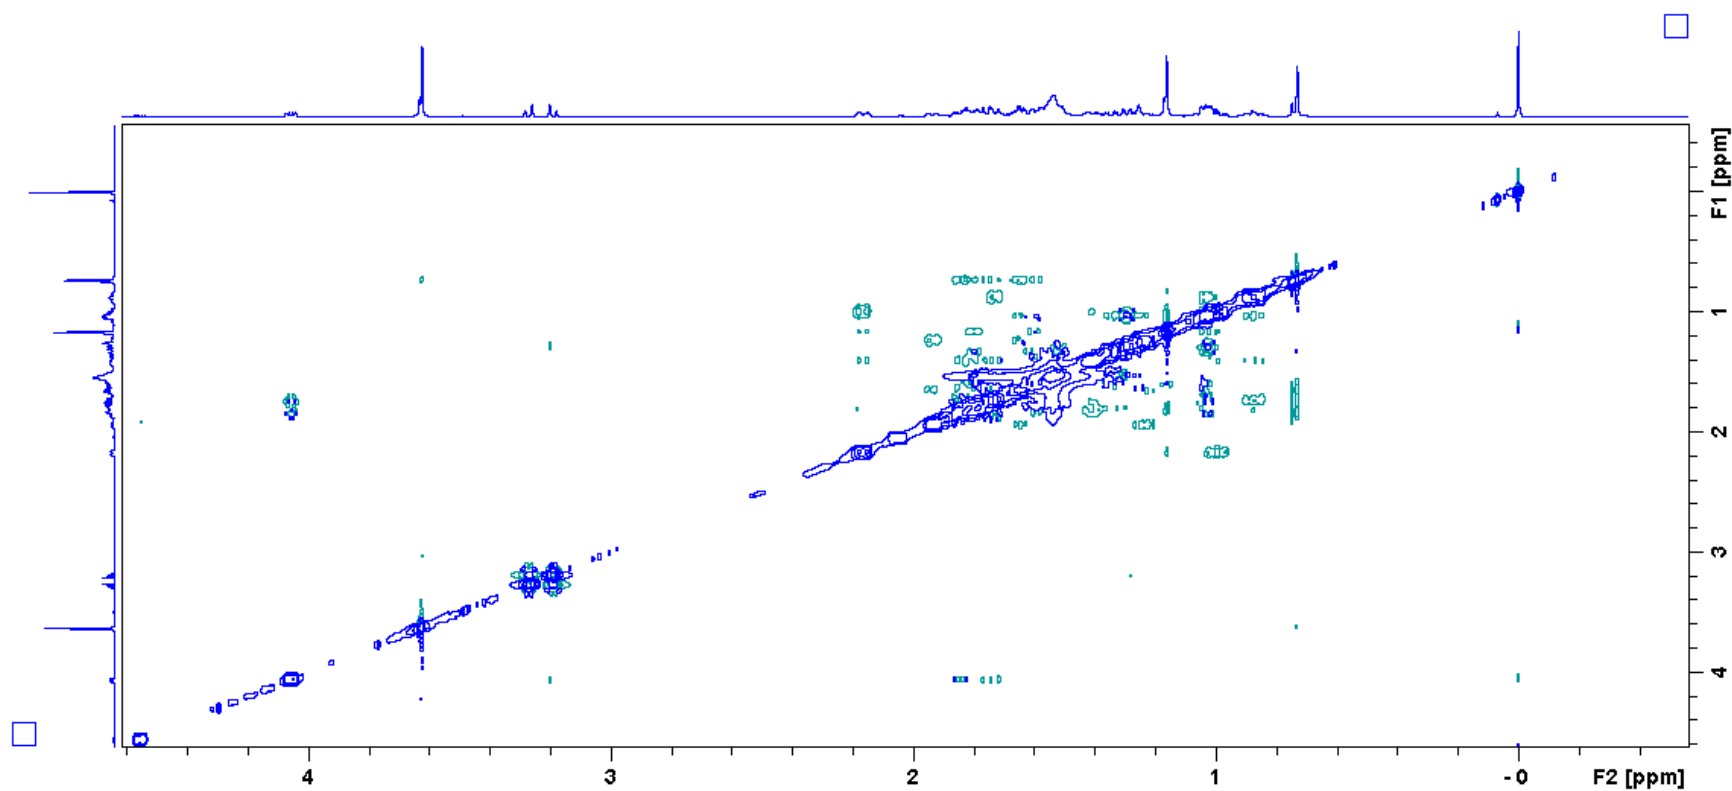

HSQC of compound (4*R*,4*aS*,6*aR*,8*R*,9*S*,11*aR*,11*bS*)-methyl 9-(azidomethyl)-8-hydroxy-4,11*b*-dimethyltetradecahydro-6*a*,9-methanocyclohepta[*a*]naphthalene-4-carboxylate (**20**)

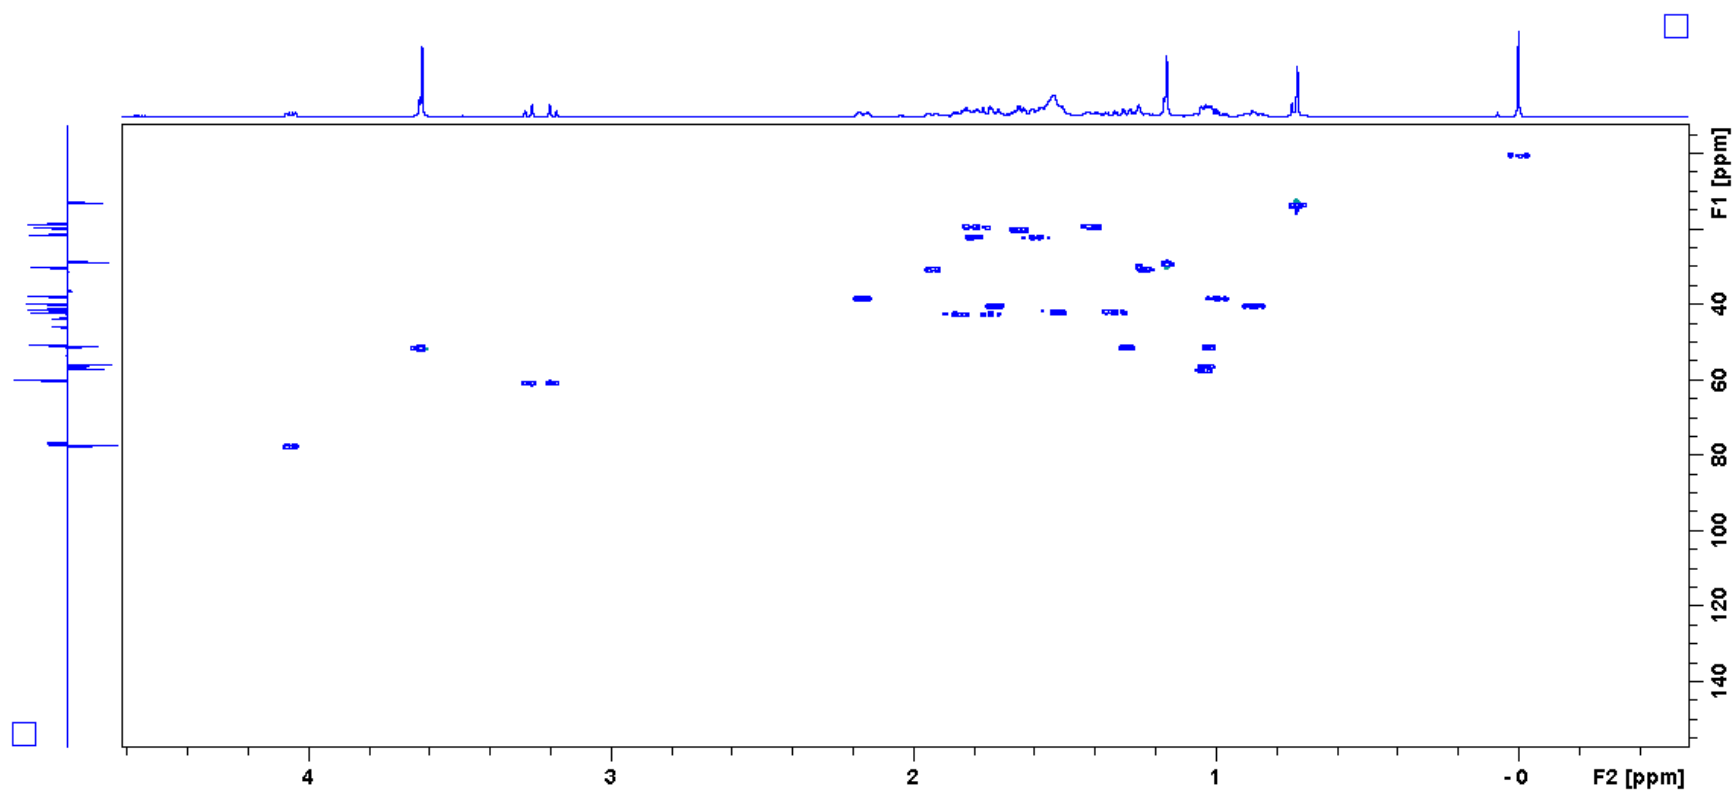

HMBC of compound (4*R*,4*aS*,6*aR*,8*R*,9*S*,11*aR*,11*bS*)-methyl 9-(azidomethyl)-8-hydroxy-4,11*b*-dimethyltetradecahydro-6*a*,9-methanocyclohepta[*a*]naphthalene-4-carboxylate (**20**)

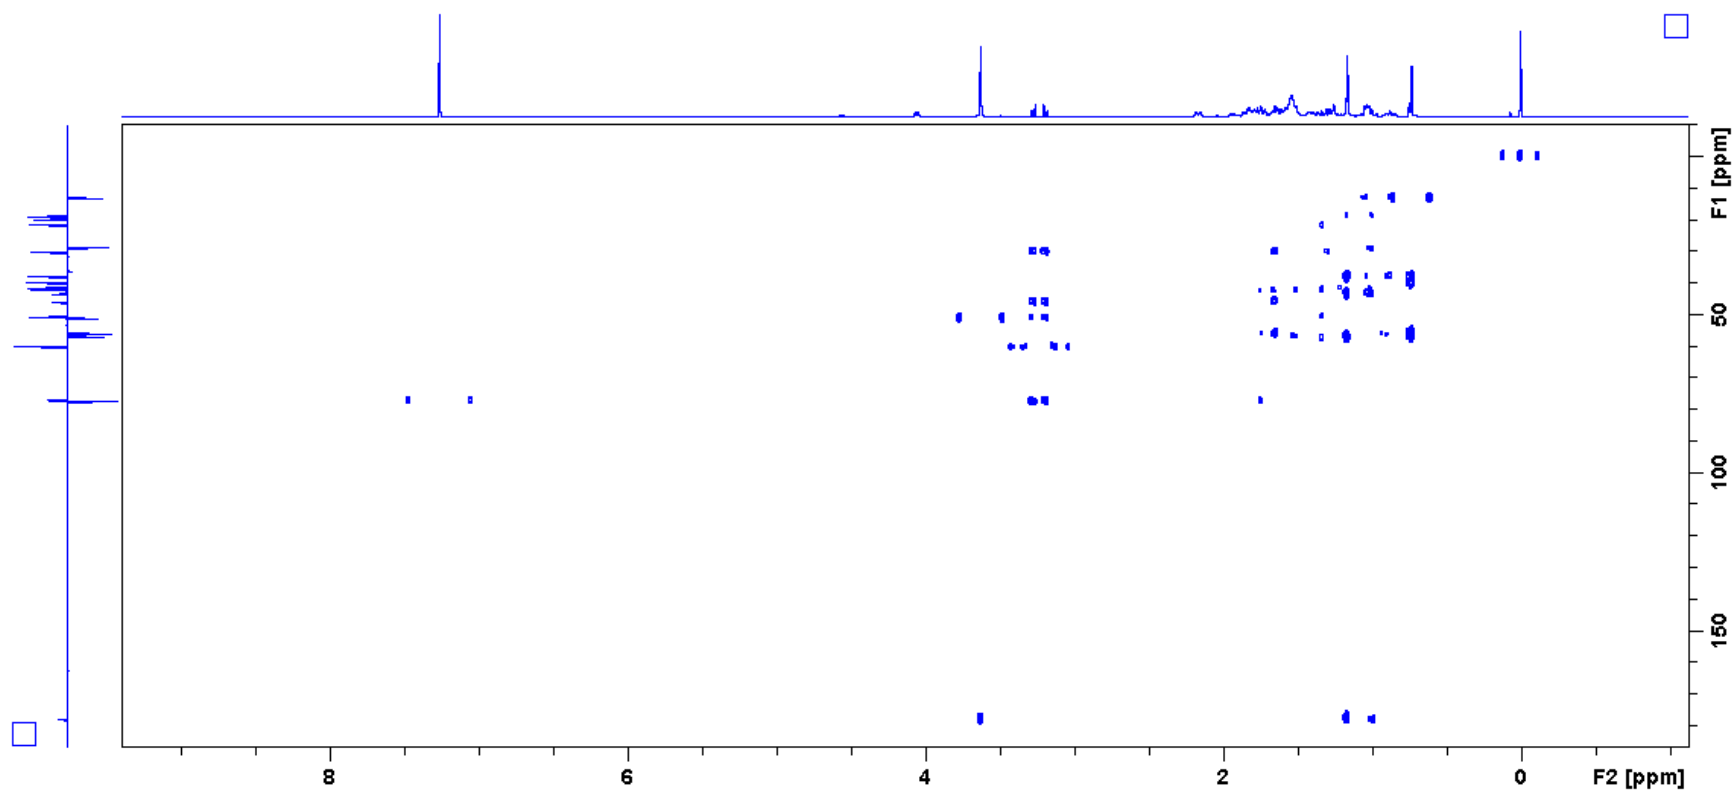



$^1\text{H}$ -NMR of compound (4*R*,4*aS*,6*aR*,8*R*,9*S*,11*aR*,11*bS*)-methyl 8-hydroxy-4,11*b*-dimethyl-9-(((methylsulfonyl)oxy)methyl)tetradecaahydro-6*a*,9-methanocyclohepta[*a*]naphthalene-4-carboxylate (**21**)

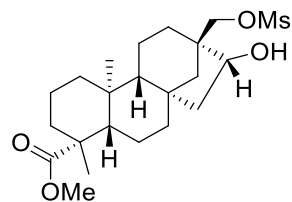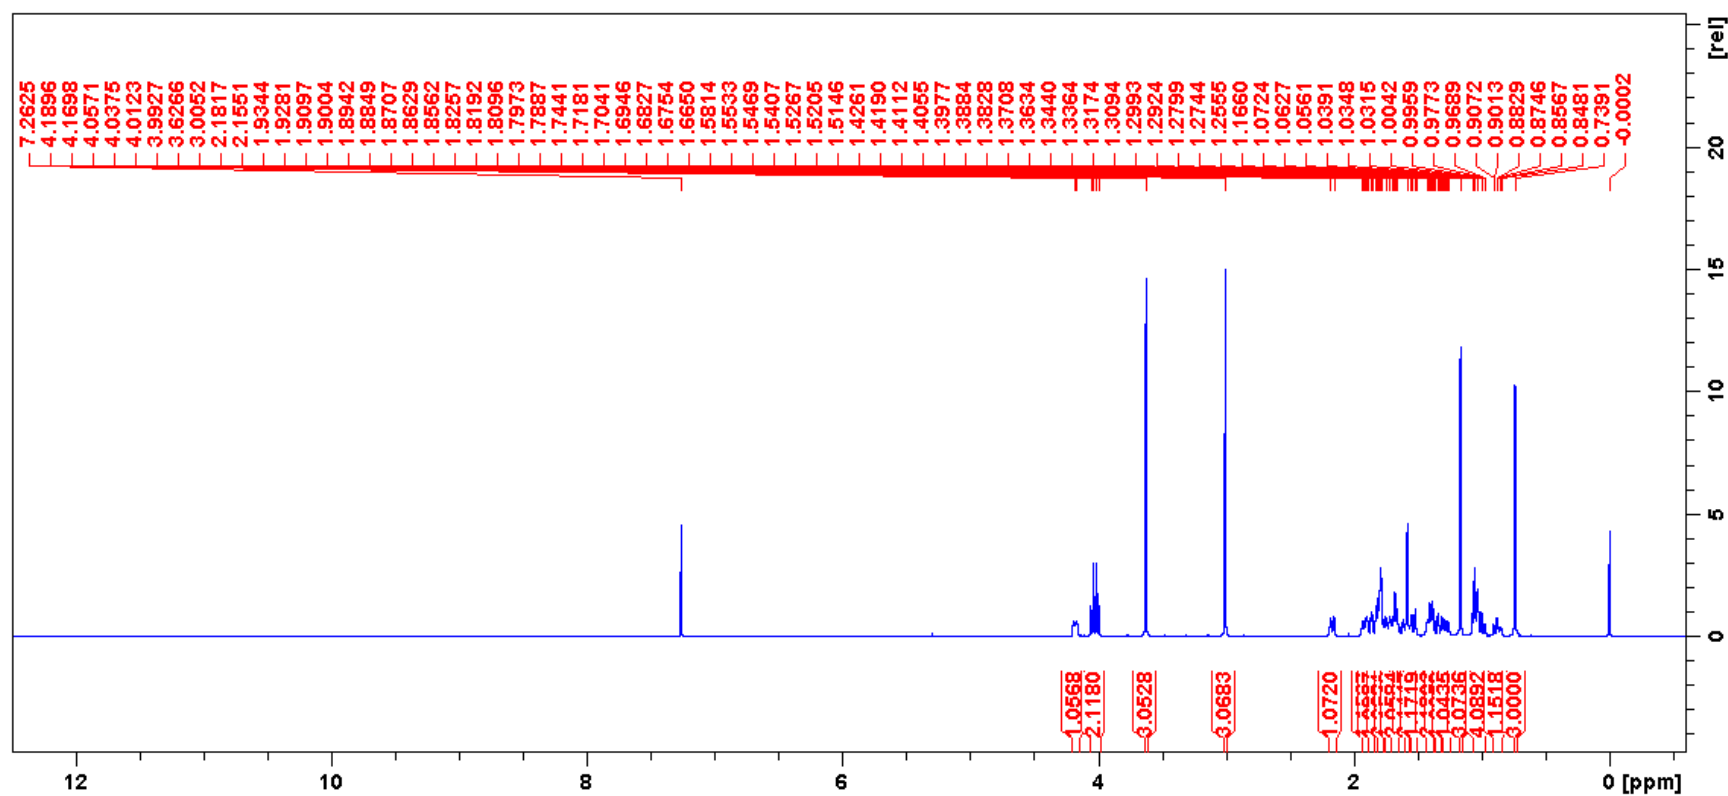

$^{13}\text{C}$ -NMR of compound (4*R*,4*aS*,6*aR*,8*R*,9*S*,11*aR*,11*bS*)-methyl 8-hydroxy-4,11*b*-dimethyl-9-(((methylsulfonyl)oxy)methyl)tetradecahydro-6*a*,9-methanocyclohepta[*a*]naphthalene-4-carboxylate (**21**)

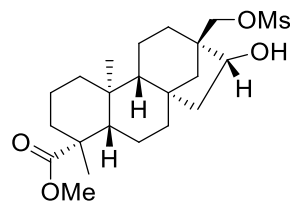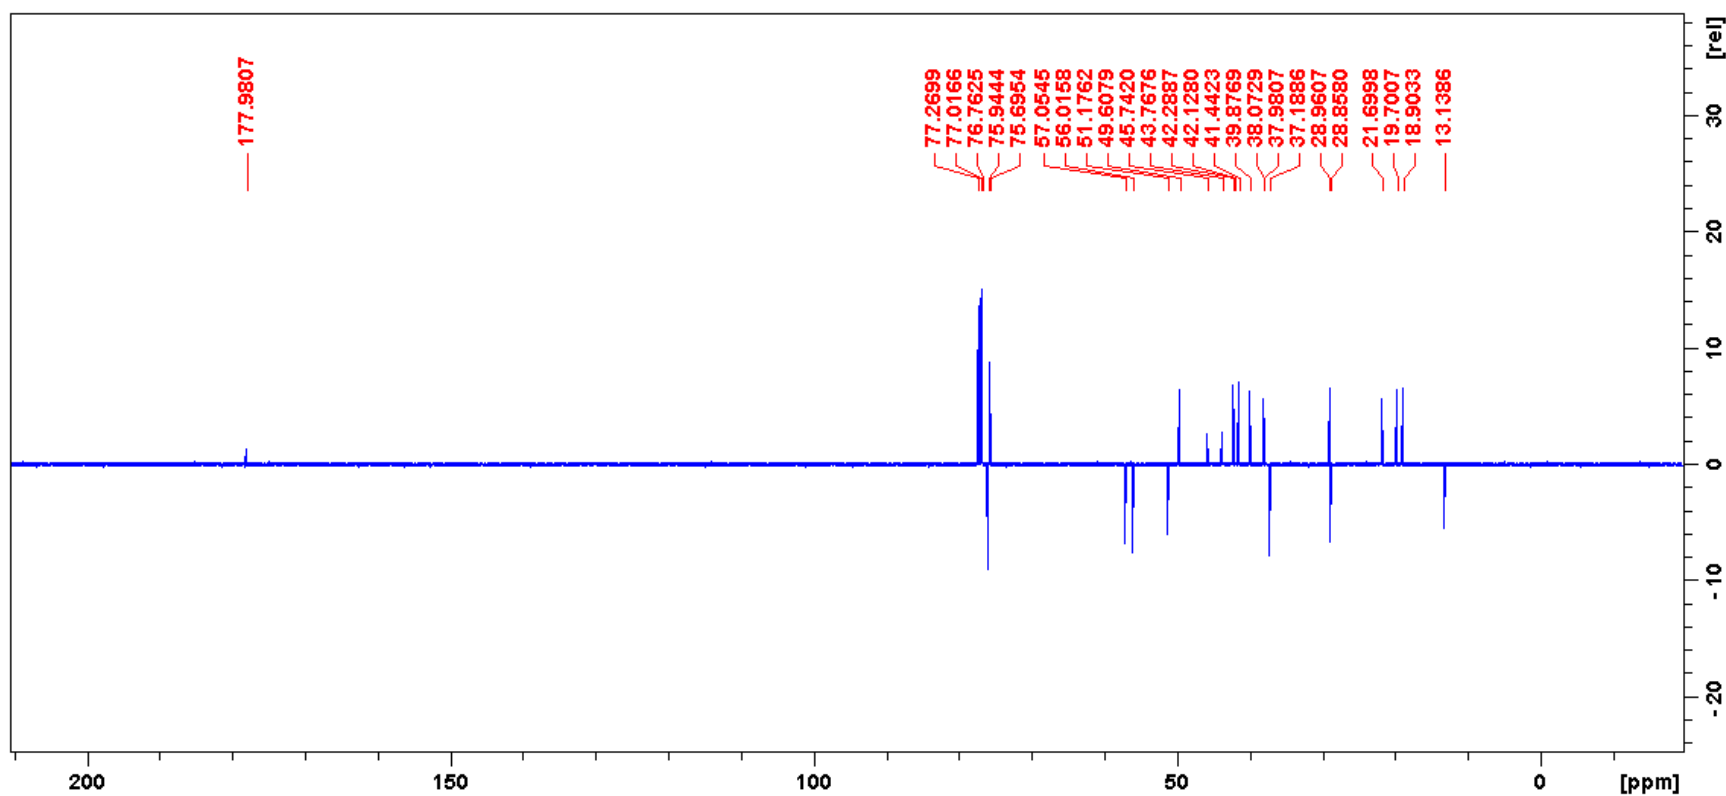

COSY of compound (4*R*,4*aS*,6*aR*,8*R*,9*S*,11*aR*,11*bS*)-methyl 8-hydroxy-4,11*b*-dimethyl-9-(((methylsulfonyl)oxy)methyl)tetradecahydro-6*a*,9-methanocyclohepta[*a*]naphthalene-4-carboxylate (**21**)

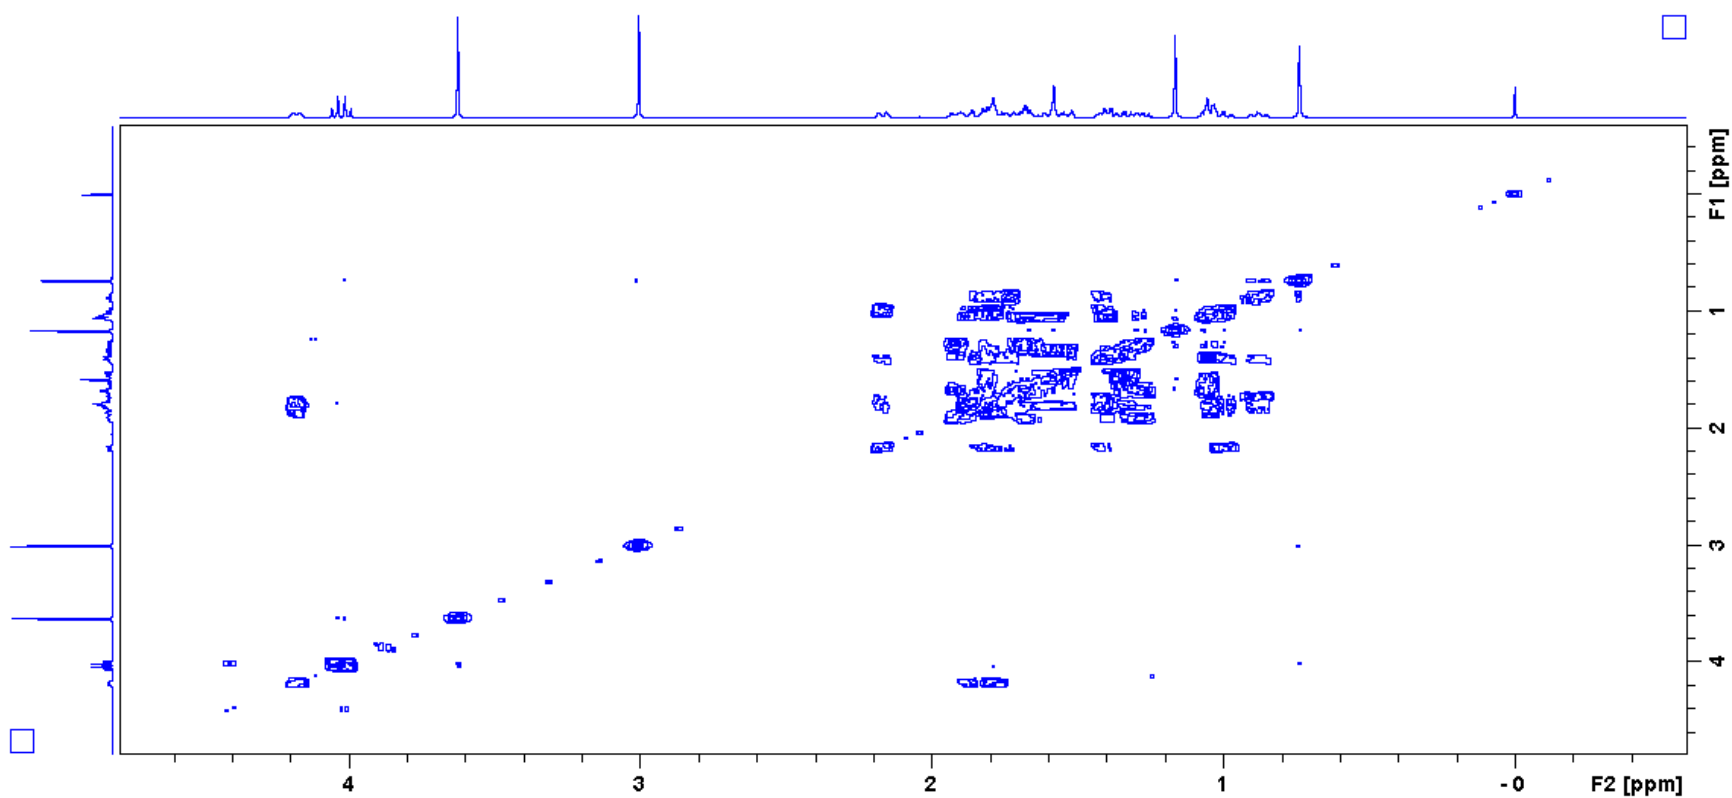

NOESY of compound (4*R*,4*aS*,6*aR*,8*R*,9*S*,11*aR*,11*bS*)-methyl 8-hydroxy-4,11*b*-dimethyl-9-(((methylsulfonyl)oxy)methyl)tetradecahydro-6*a*,9-methanocyclohepta[*a*]naphthalene-4-carboxylate (**21**)

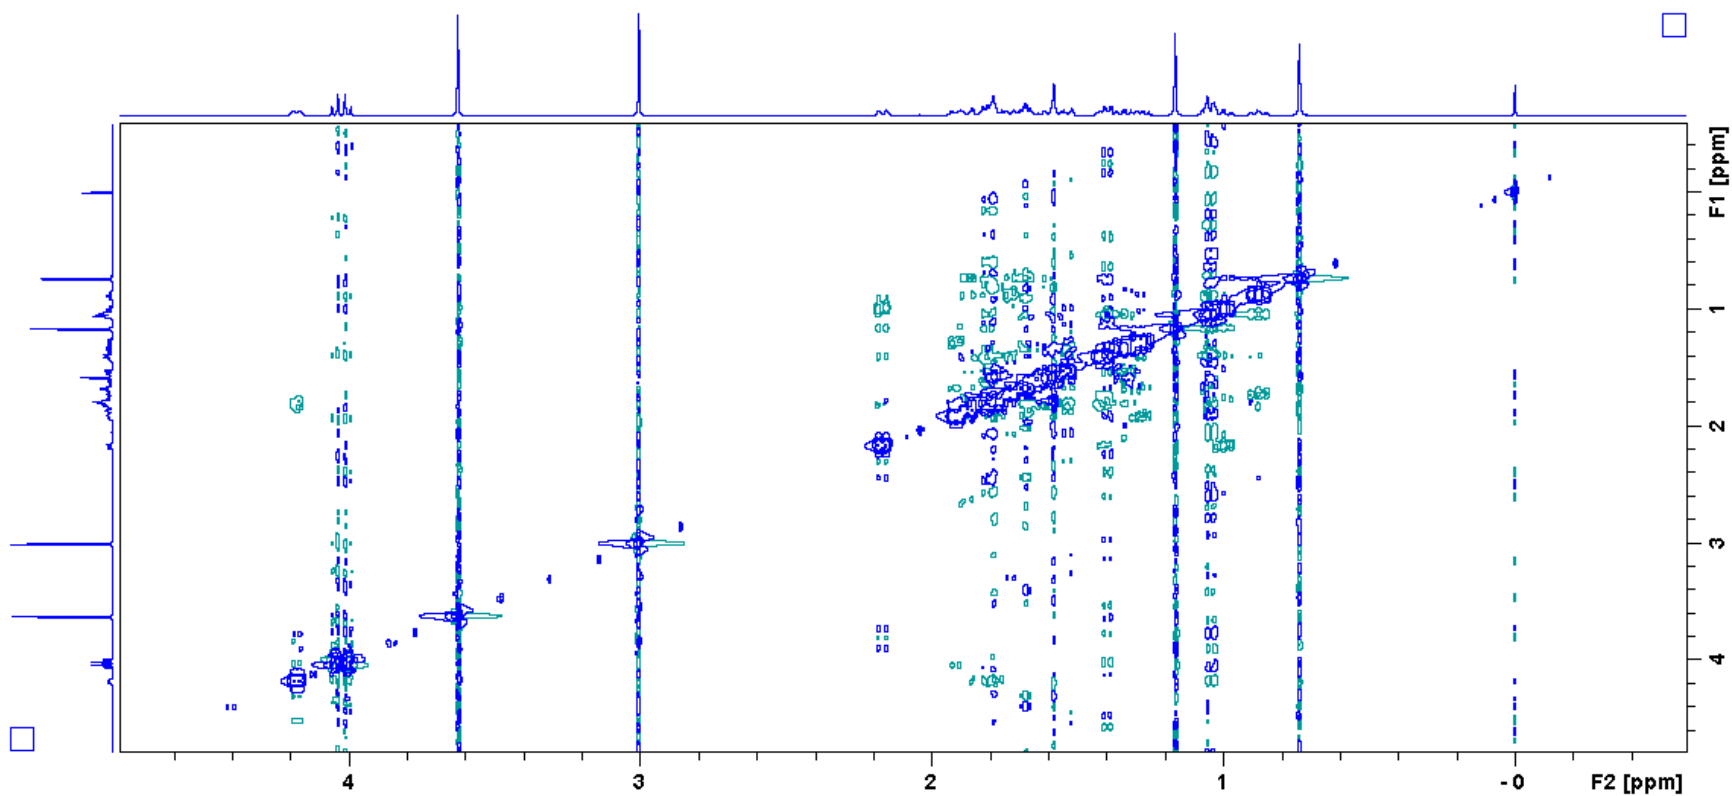

HSQC of compound (4*R*,4*aS*,6*aR*,8*R*,9*S*,11*aR*,11*bS*)-methyl 8-hydroxy-4,11*b*-dimethyl-9-(((methylsulfonyl)oxy)methyl)tetradecahydro-6*a*,9-methanocyclohepta[*a*]naphthalene-4-carboxylate (**21**)

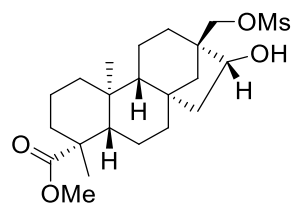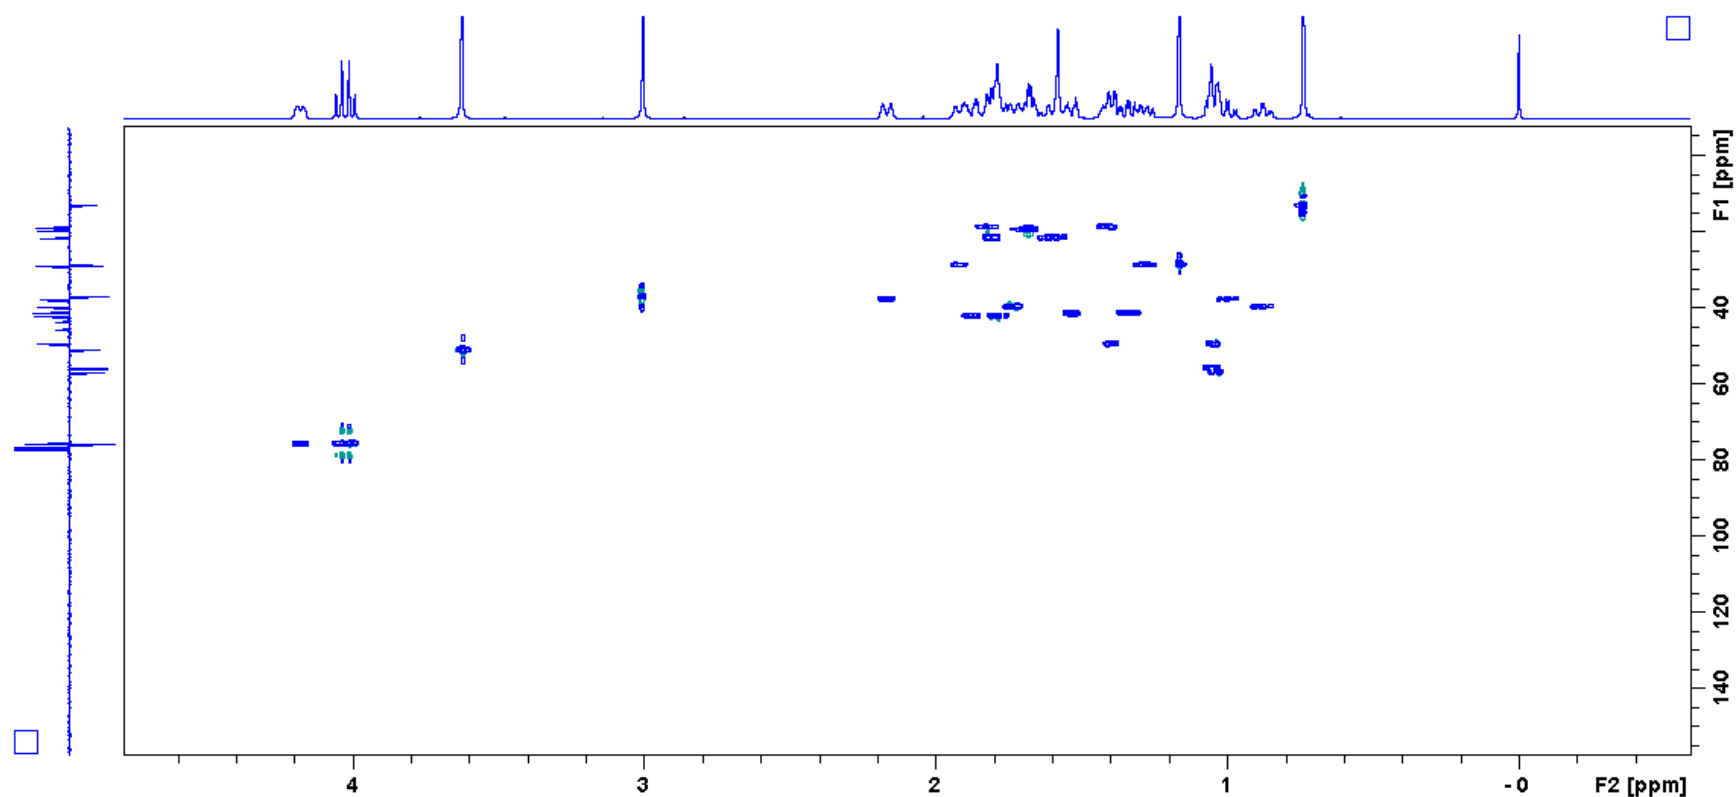

HMBC of compound (4*R*,4*aS*,6*aR*,8*R*,9*S*,11*aR*,11*bS*)-methyl 8-hydroxy-4,11*b*-dimethyl-9-(((methylsulfonyl)oxy)methyl)tetradecahydro-6*a*,9-methanocyclohepta[*a*]naphthalene-4-carboxylate (**21**)

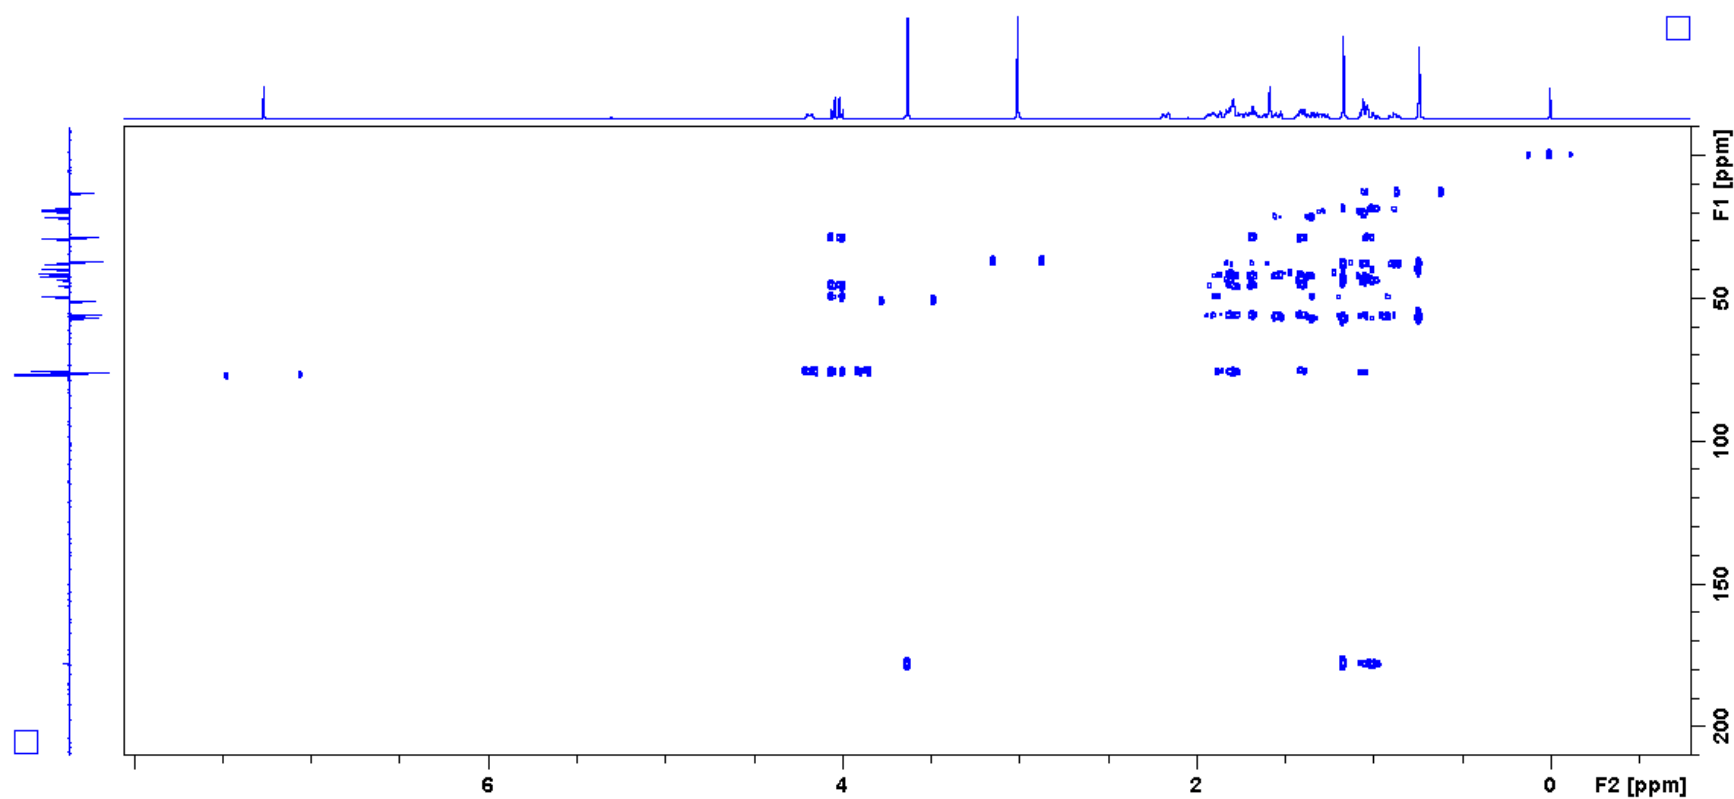

$^1\text{H}$ -NMR of compound (4*R*,4*aS*,6*aR*,8*R*,9*S*,11*aR*,11*bS*)-methyl 9-((benzylamino)methyl)-8-hydroxy-4,11b-dimethyltetradecahydro-6*a*,9-methanocyclohepta[*a*]naphthalene-4-carboxylate (**22**)

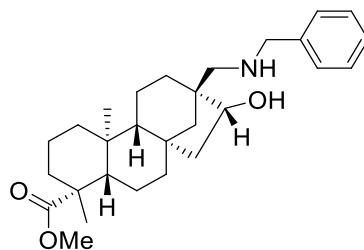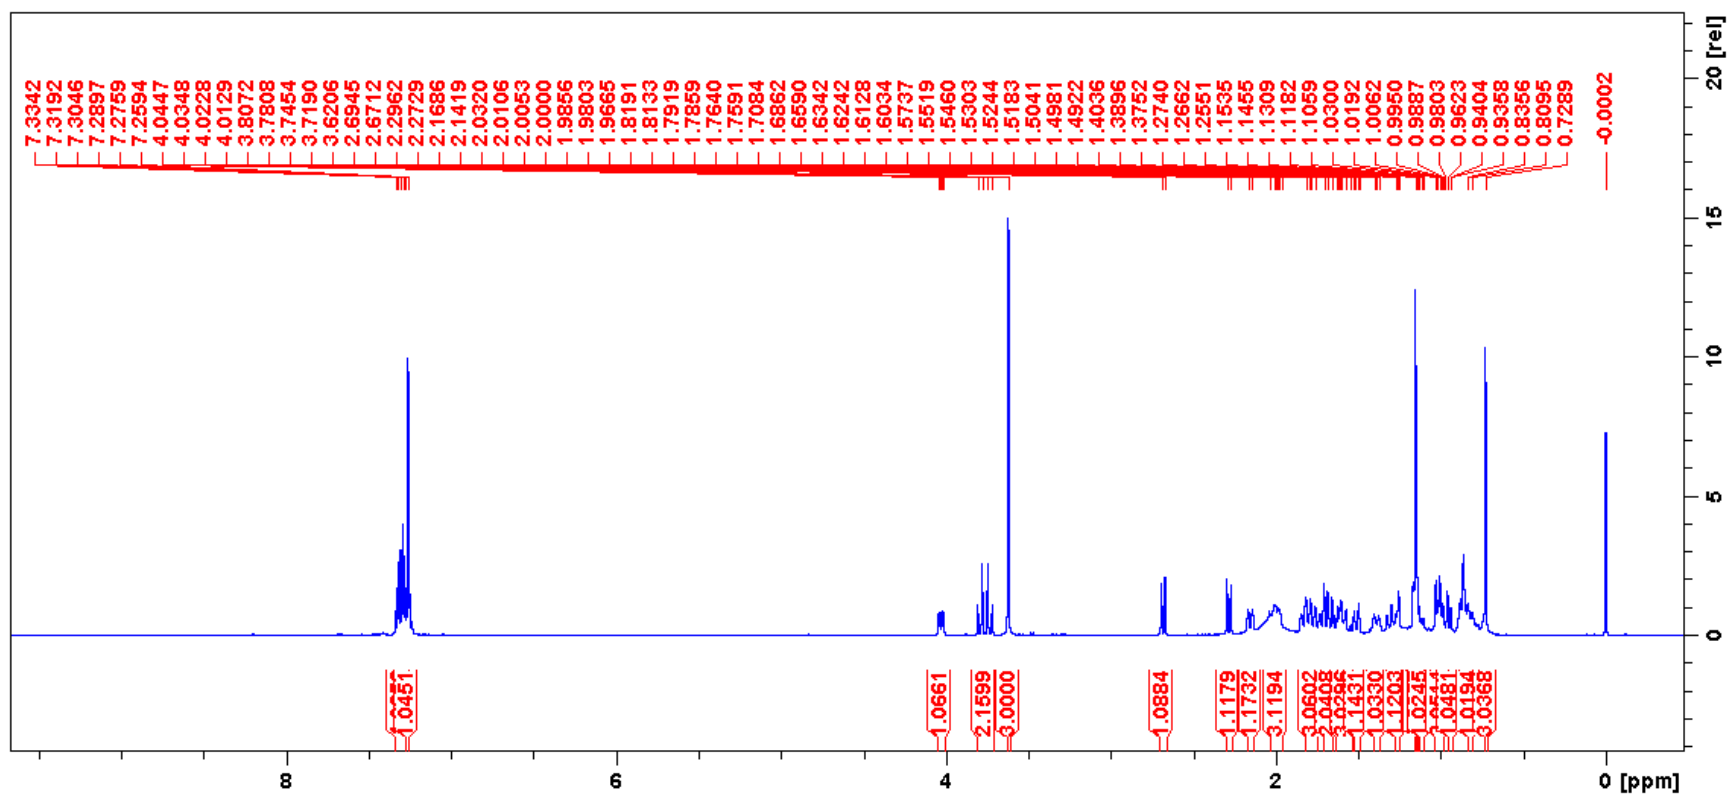

$^{13}\text{C}$ -NMR of compound (4*R*,4*aS*,6*aR*,8*R*,9*S*,11*aR*,11*bS*)-methyl 9-((benzylamino)methyl)-8-hydroxy-4,11b-dimethyltetradecahydro-6*a*,9-methanocyclohepta[*a*]naphthalene-4-carboxylate (**22**)

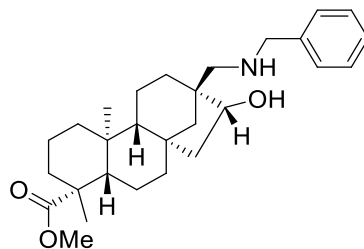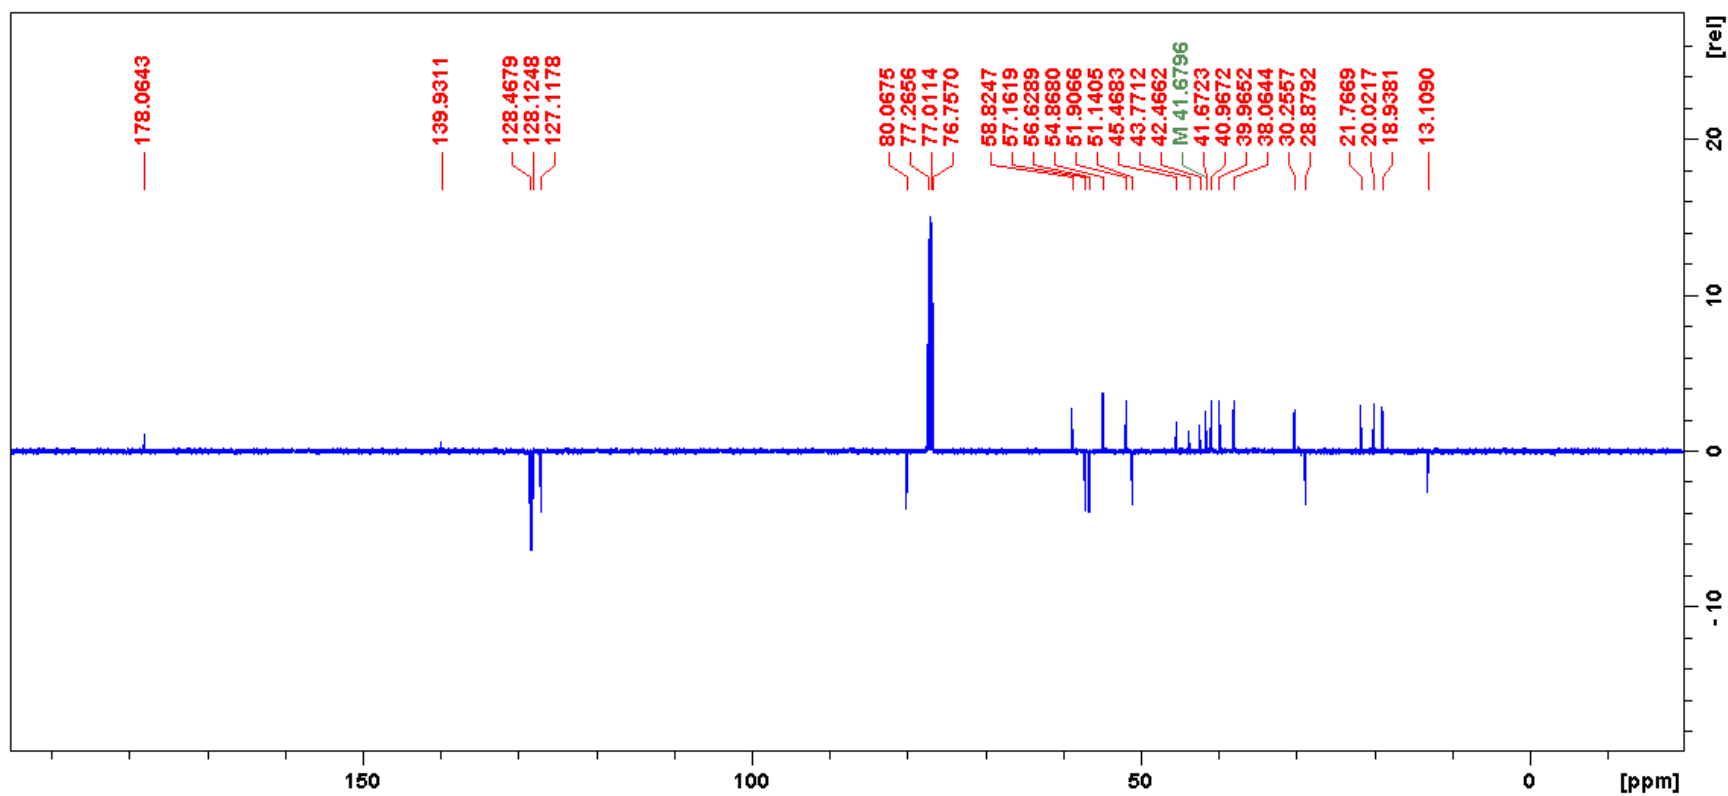



COSY of compound (4*R*,4*aS*,6*aR*,8*R*,9*S*,11*aR*,11*bS*)-methyl 9-((benzylamino)methyl)-8-hydroxy-4,11b-dimethyltetradecahydro-6*a*,9-methanocyclohepta[*a*]naphthalene-4-carboxylate (**22**)

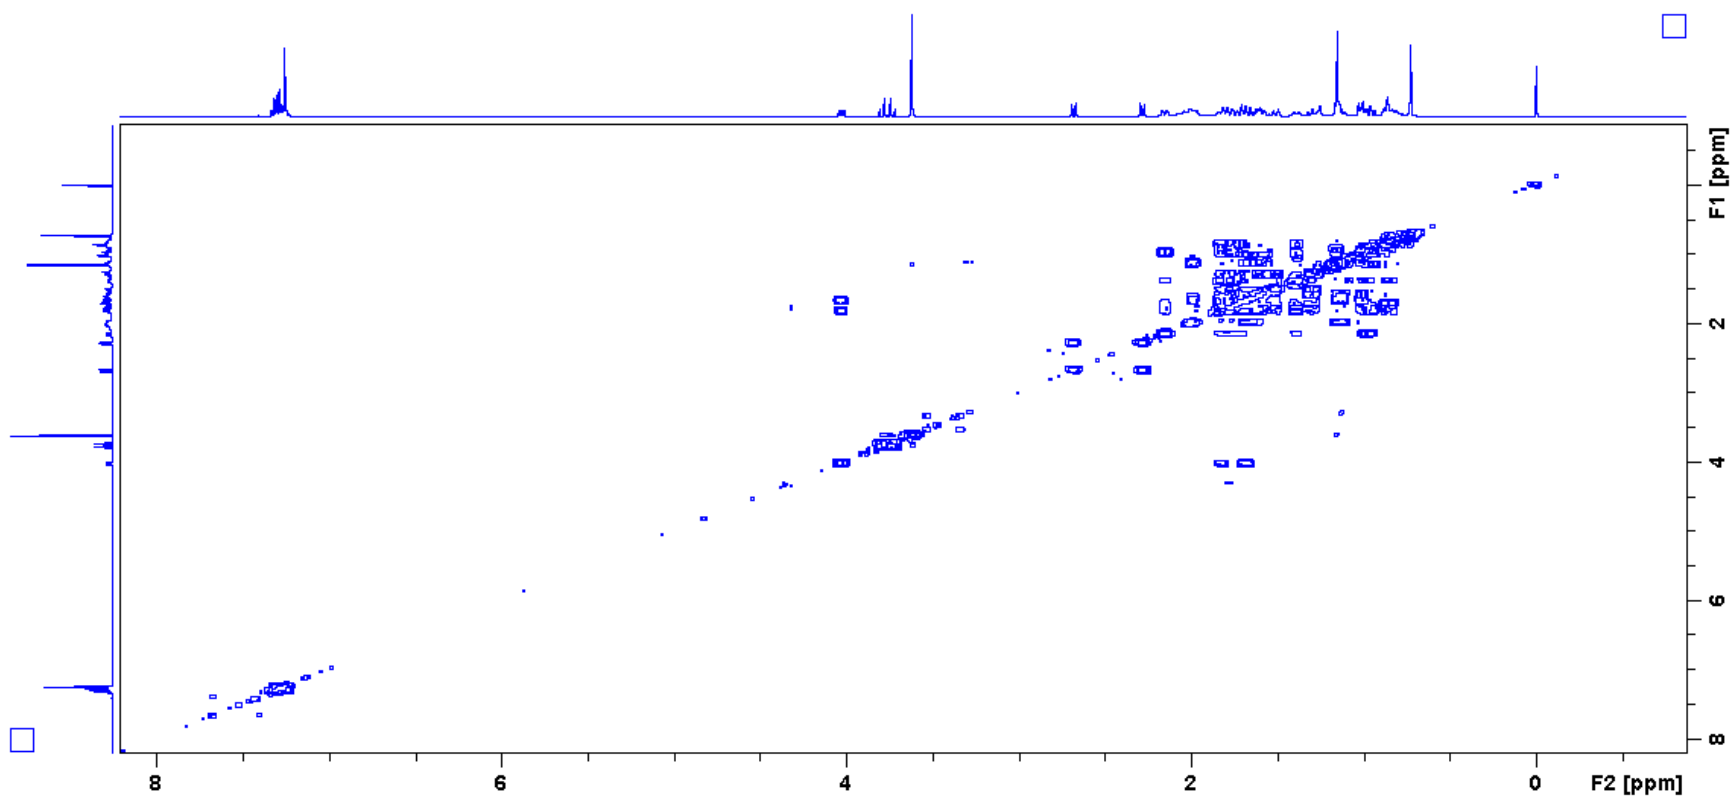

NOESY of compound (4*R*,4*aS*,6*aR*,8*R*,9*S*,11*aR*,11*bS*)-methyl 9-((benzylamino)methyl)-8-hydroxy-4,11b-dimethyltetradecahydro-6*a*,9-methanocyclohepta[*a*]naphthalene-4-carboxylate (**22**)

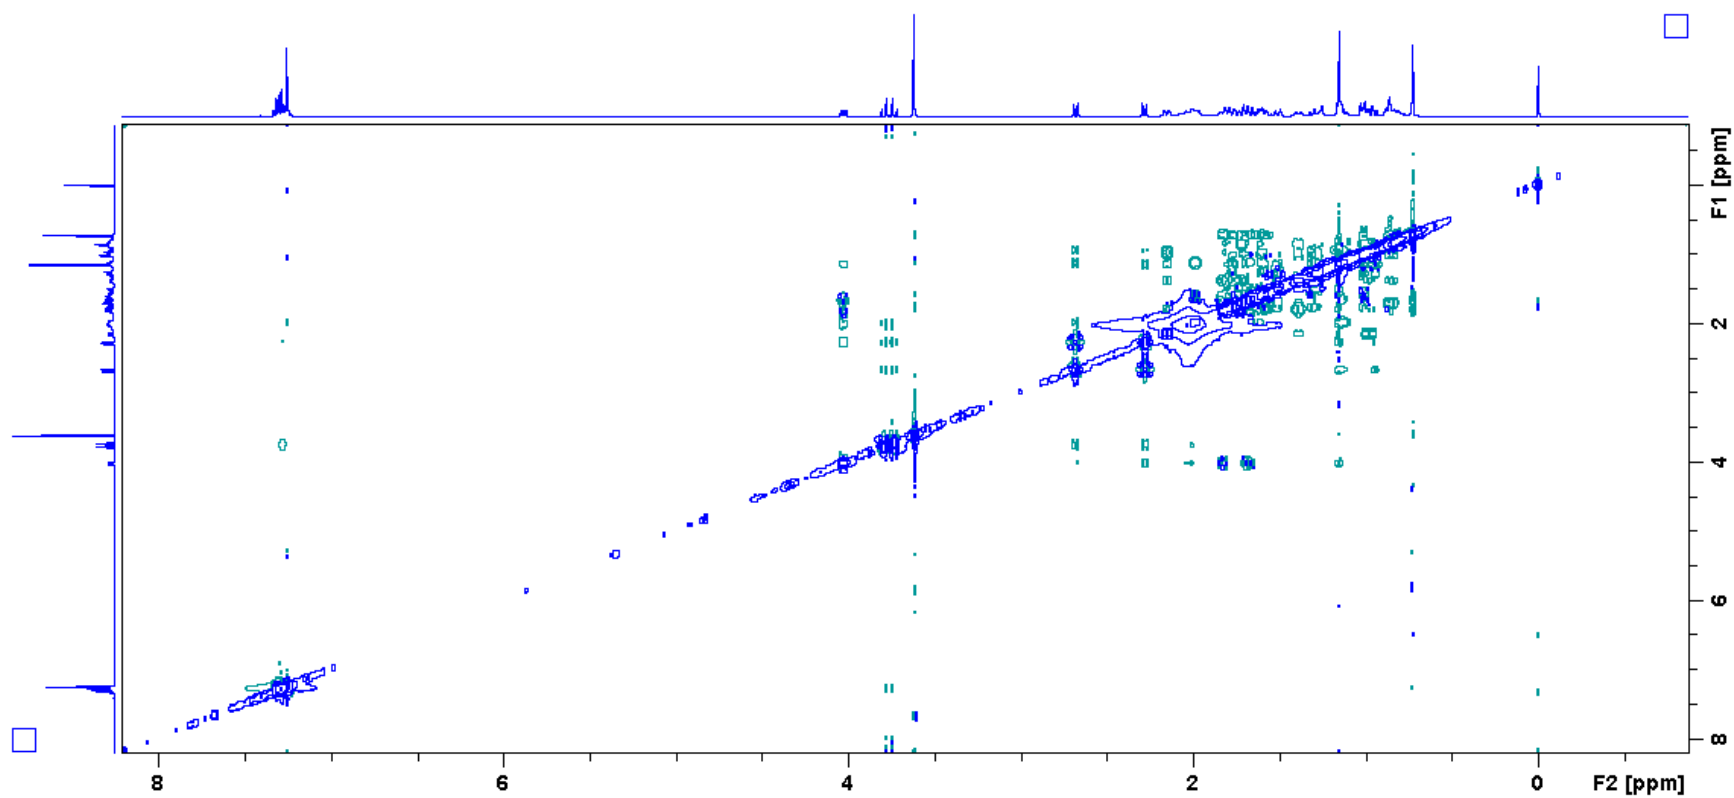

HSQC of compound (4*R*,4*aS*,6*aR*,8*R*,9*S*,11*aR*,11*bS*)-methyl 9-((benzylamino)methyl)-8-hydroxy-4,11b-dimethyltetradecahydro-6*a*,9-methanocyclohepta[*a*]naphthalene-4-carboxylate (**22**)

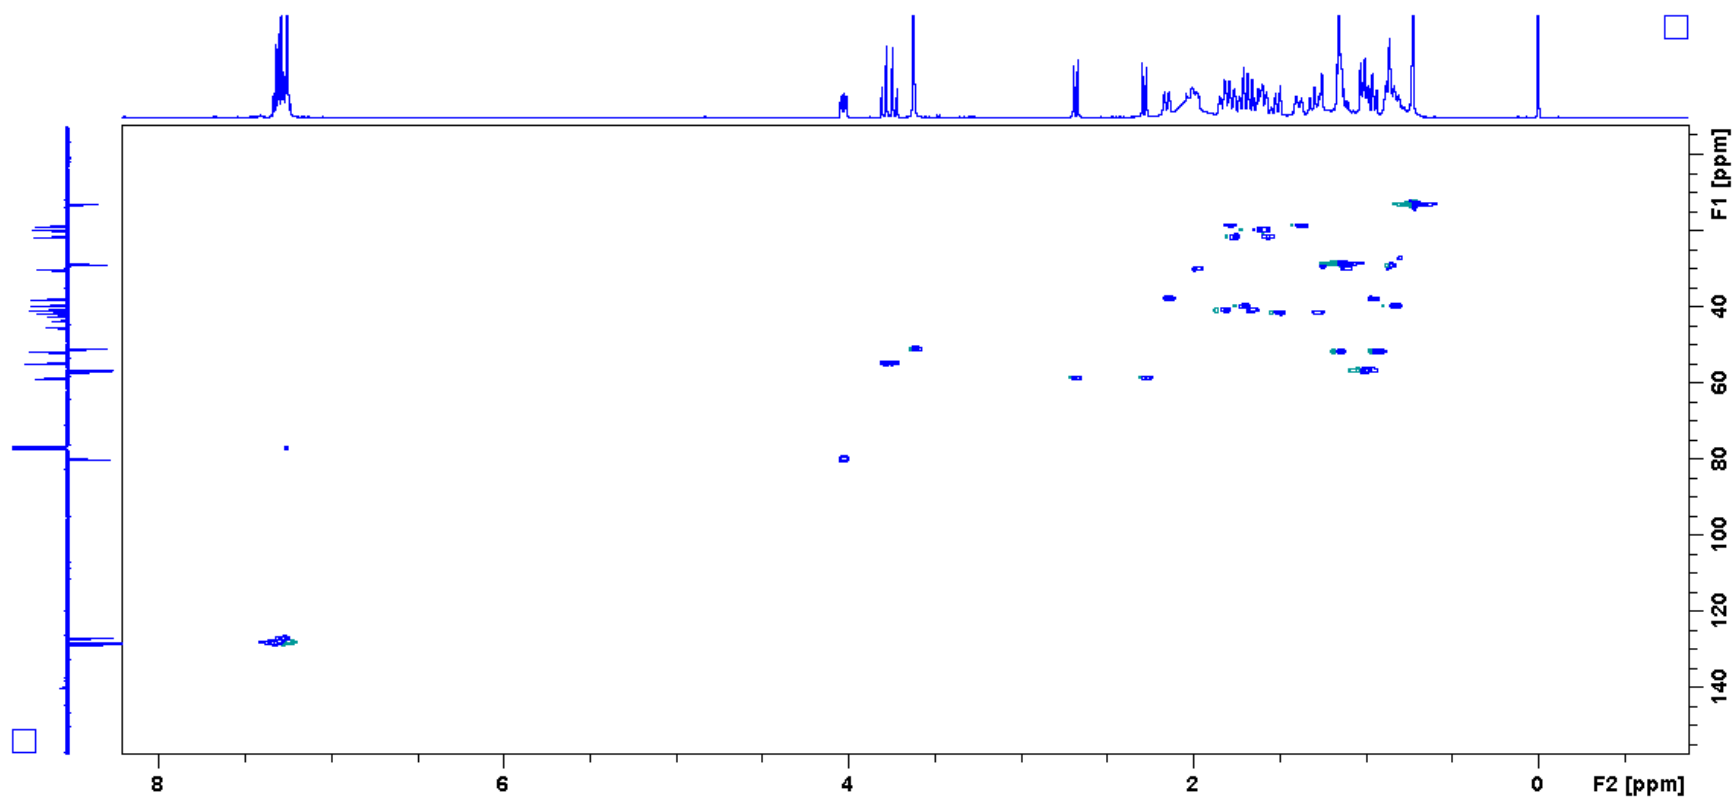

HMBC of compound (4*R*,4*aS*,6*aR*,8*R*,9*S*,11*aR*,11*bS*)-methyl 9-((benzylamino)methyl)-8-hydroxy-4,11b-dimethyltetradecahydro-6*a*,9-methanocyclohepta[*a*]naphthalene-4-carboxylate (**22**)

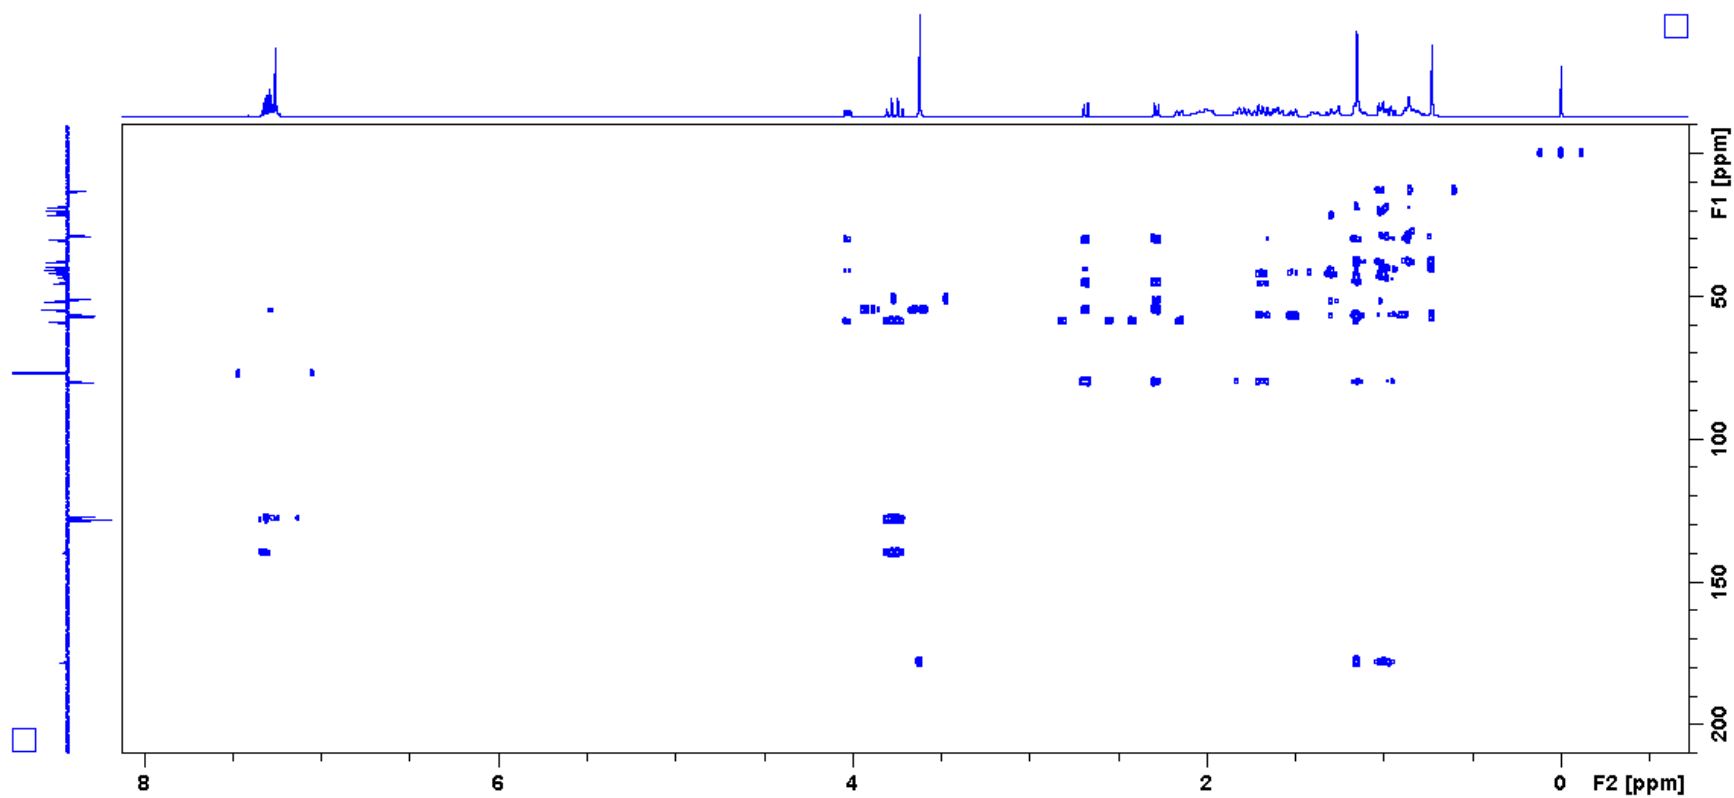

$^1\text{H}$ -NMR of compound (4*R*,4*aS*,6*aR*,8*R*,9*S*,11*aR*,11*bS*)-methyl 9-(((4-fluorobenzyl)amino)methyl)-8-hydroxy-4,11b-dimethyltetradecahydro-6*a*,9-methanocyclohepta[*a*]naphthalene-4-carboxylate (**23**)

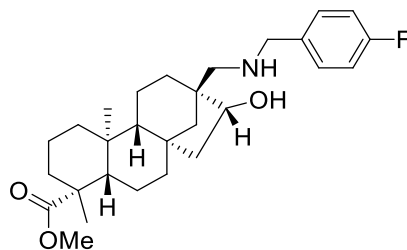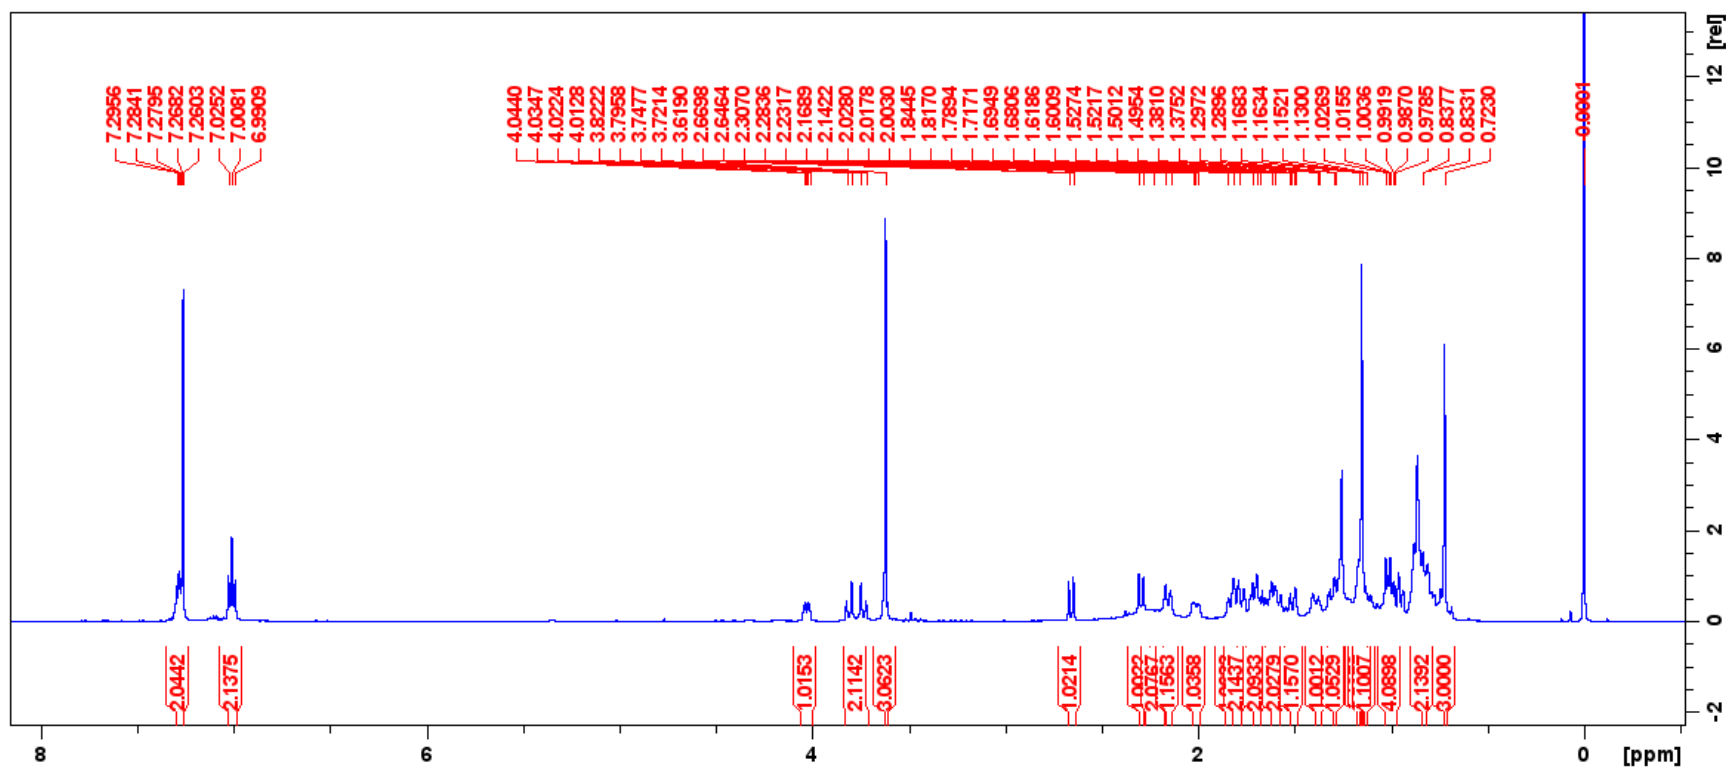

$^{13}\text{C}$ -NMR of compound (4*R*,4*aS*,6*aR*,8*R*,9*S*,11*aR*,11*bS*)-methyl 9-(((4-fluorobenzyl)amino)methyl)-8-hydroxy-4,11b-dimethyltetradecahydro-6*a*,9-methanocyclohepta[*a*]naphthalene-4-carboxylate (**23**)

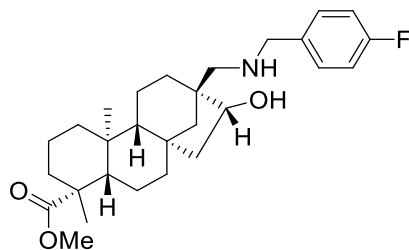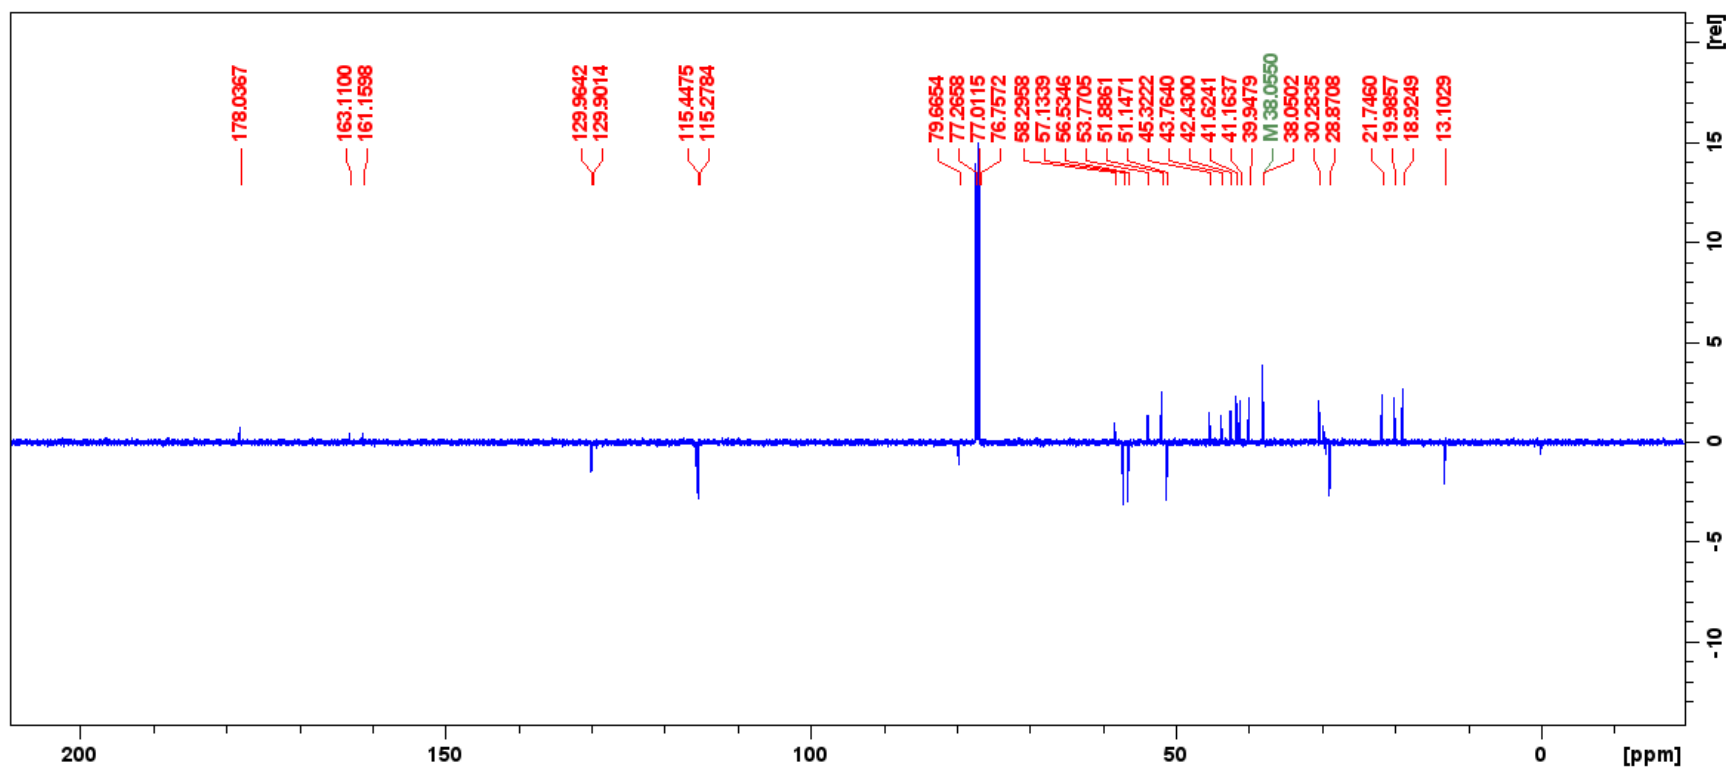

COSY of compound (4*R*,4*aS*,6*aR*,8*R*,9*S*,11*aR*,11*bS*)-methyl 9-(((4-fluorobenzyl)amino)methyl)-8-hydroxy-4,11b-dimethyltetradecahydro-6*a*,9-methanocyclohepta[*a*]naphthalene-4-carboxylate (**23**)

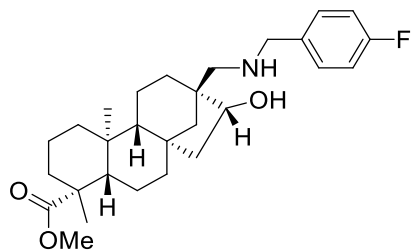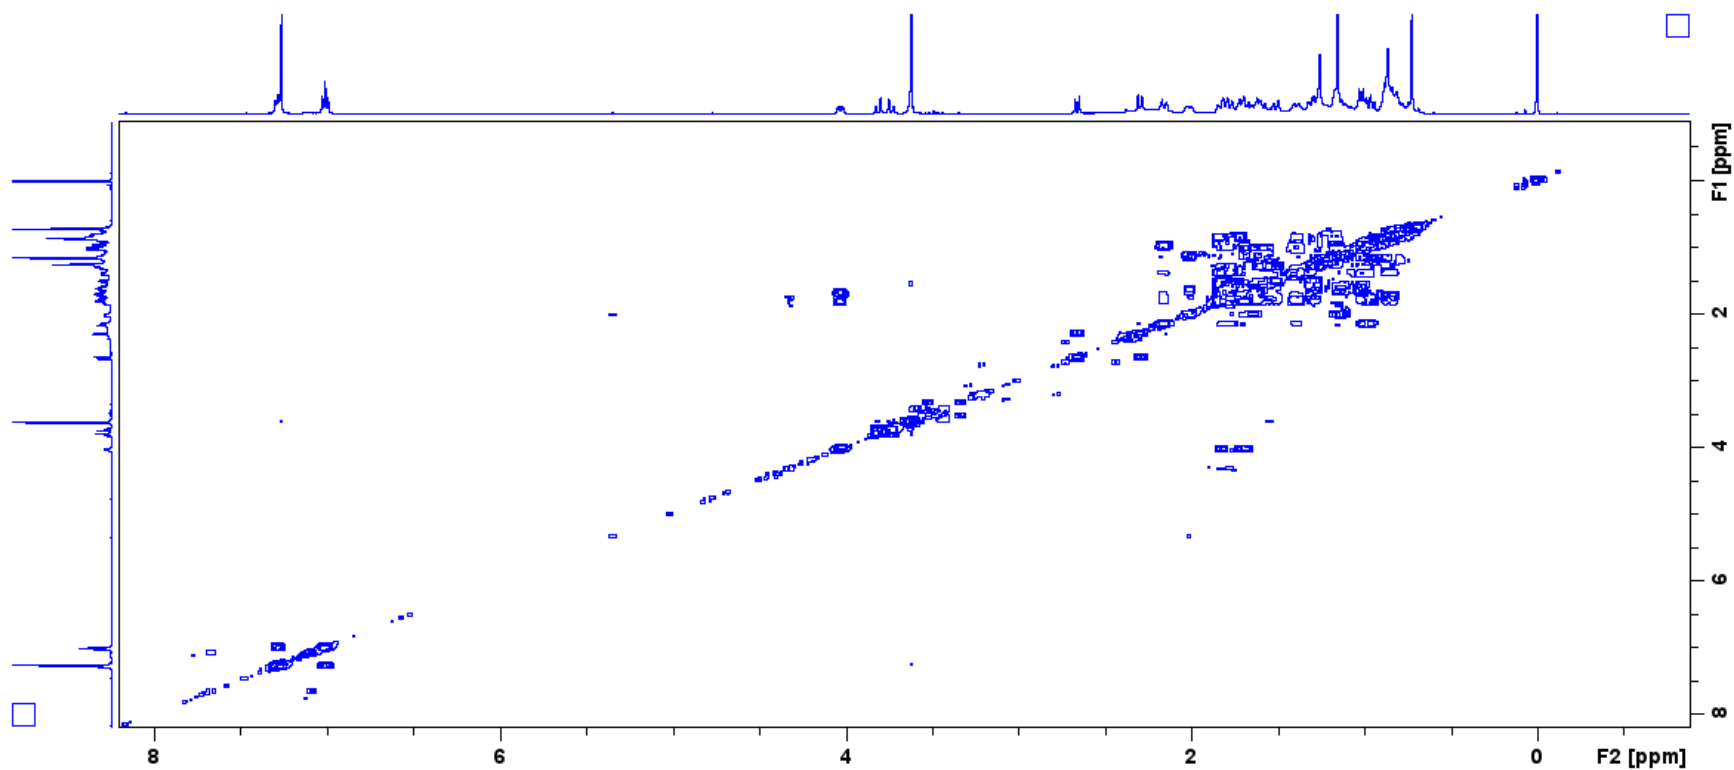

NOESY of compound (4*R*,4*aS*,6*aR*,8*R*,9*S*,11*aR*,11*bS*)-methyl 9-(((4-fluorobenzyl)amino)methyl)-8-hydroxy-4,11b-dimethyltetradecahydro-6*a*,9-methanocyclohepta[*a*]naphthalene-4-carboxylate (**23**)

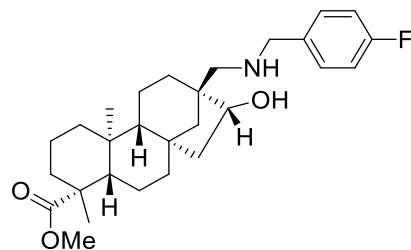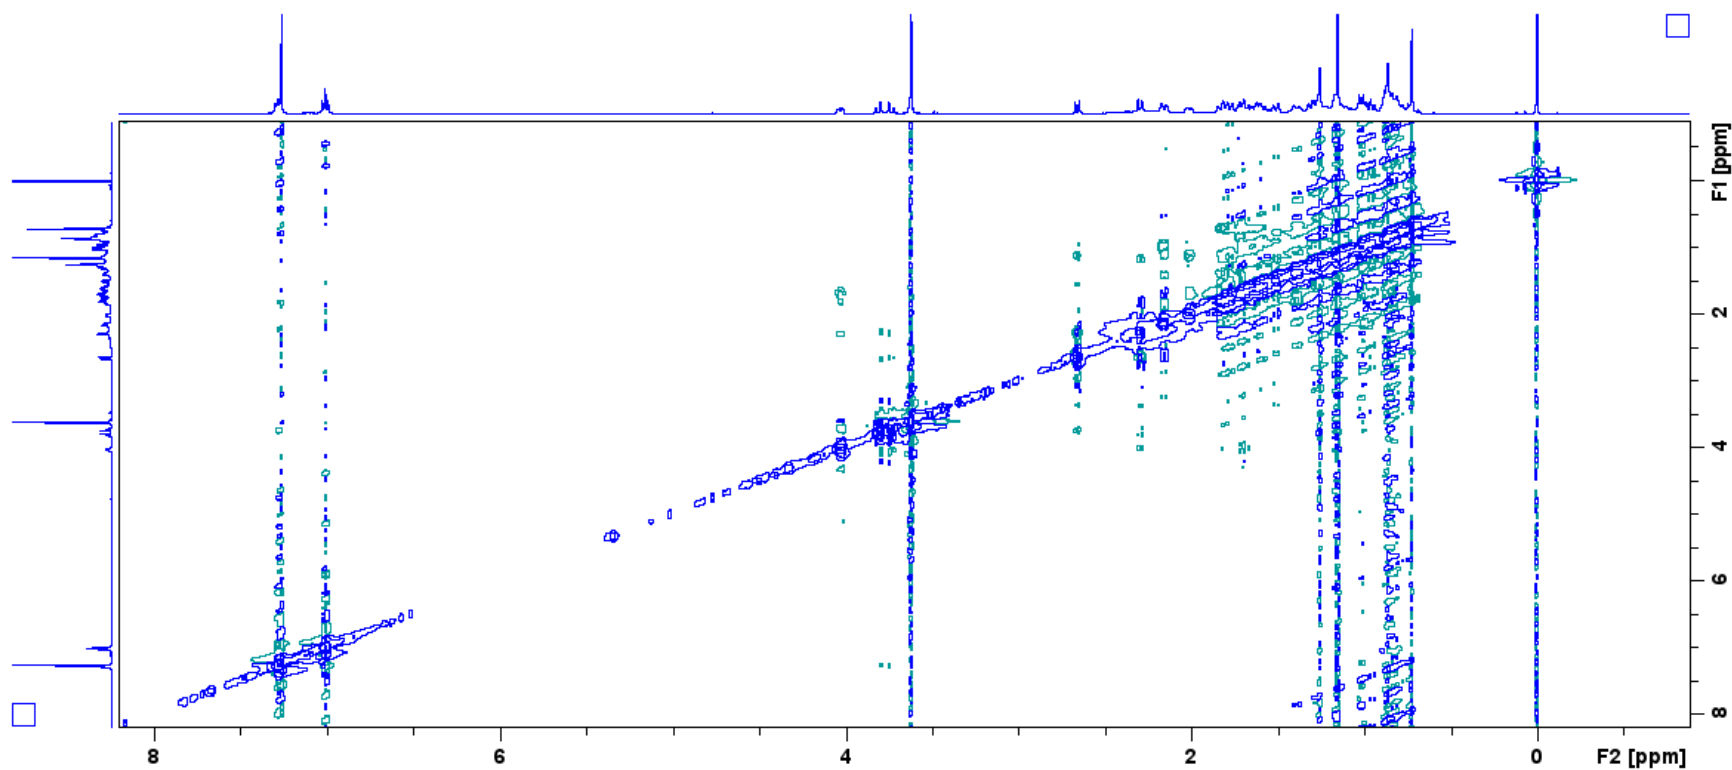



HSQC of compound (4*R*,4*aS*,6*aR*,8*R*,9*S*,11*aR*,11*bS*)-methyl 9-(((4-fluorobenzyl)amino)methyl)-8-hydroxy-4,11b-dimethyltetradecahydro-6*a*,9-methanocyclohepta[*a*]naphthalene-4-carboxylate (**23**)

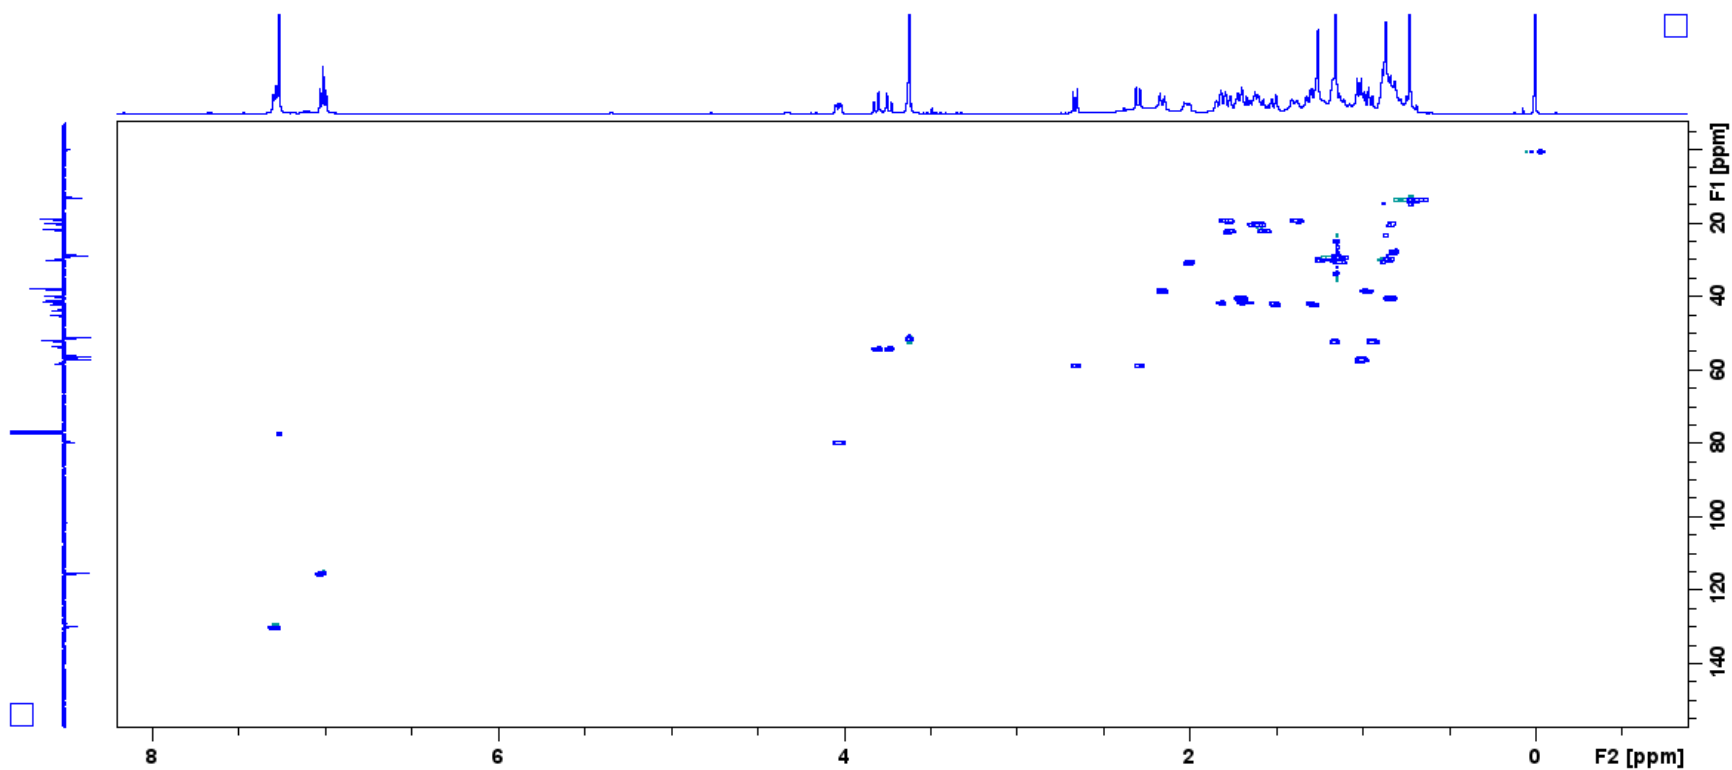

HMBC of compound (4*R*,4*aS*,6*aR*,8*R*,9*S*,11*aR*,11*bS*)-methyl 9-(((4-fluorobenzyl)amino)methyl)-8-hydroxy-4,11*b*-dimethyltetradecahydro-6*a*,9-methanocyclohepta[*a*]naphthalene-4-carboxylate (**23**)

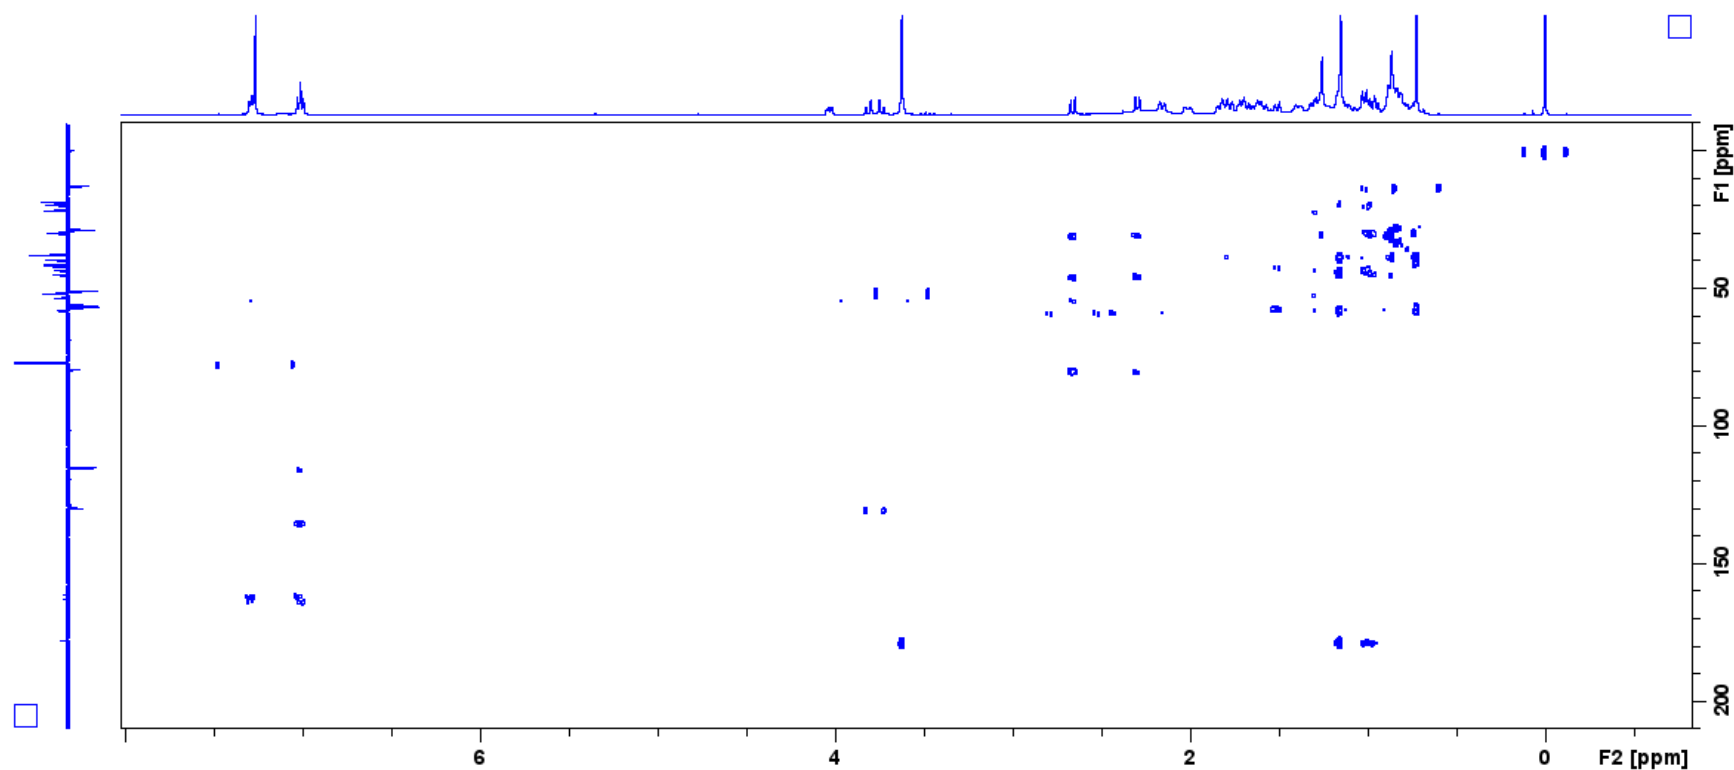

$^{19}\text{F}$ -NMR of compound (4*R*,4*aS*,6*aR*,8*R*,9*S*,11*aR*,11*bS*)-methyl 9-(((4-fluorobenzyl)amino)methyl)-8-hydroxy-4,11b-dimethyltetradecahydro-6*a*,9-methanocyclohepta[*a*]naphthalene-4-carboxylate (**23**)

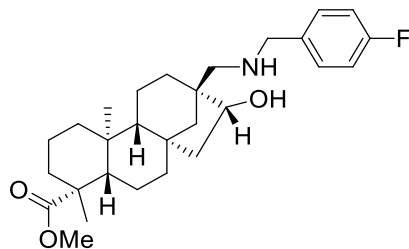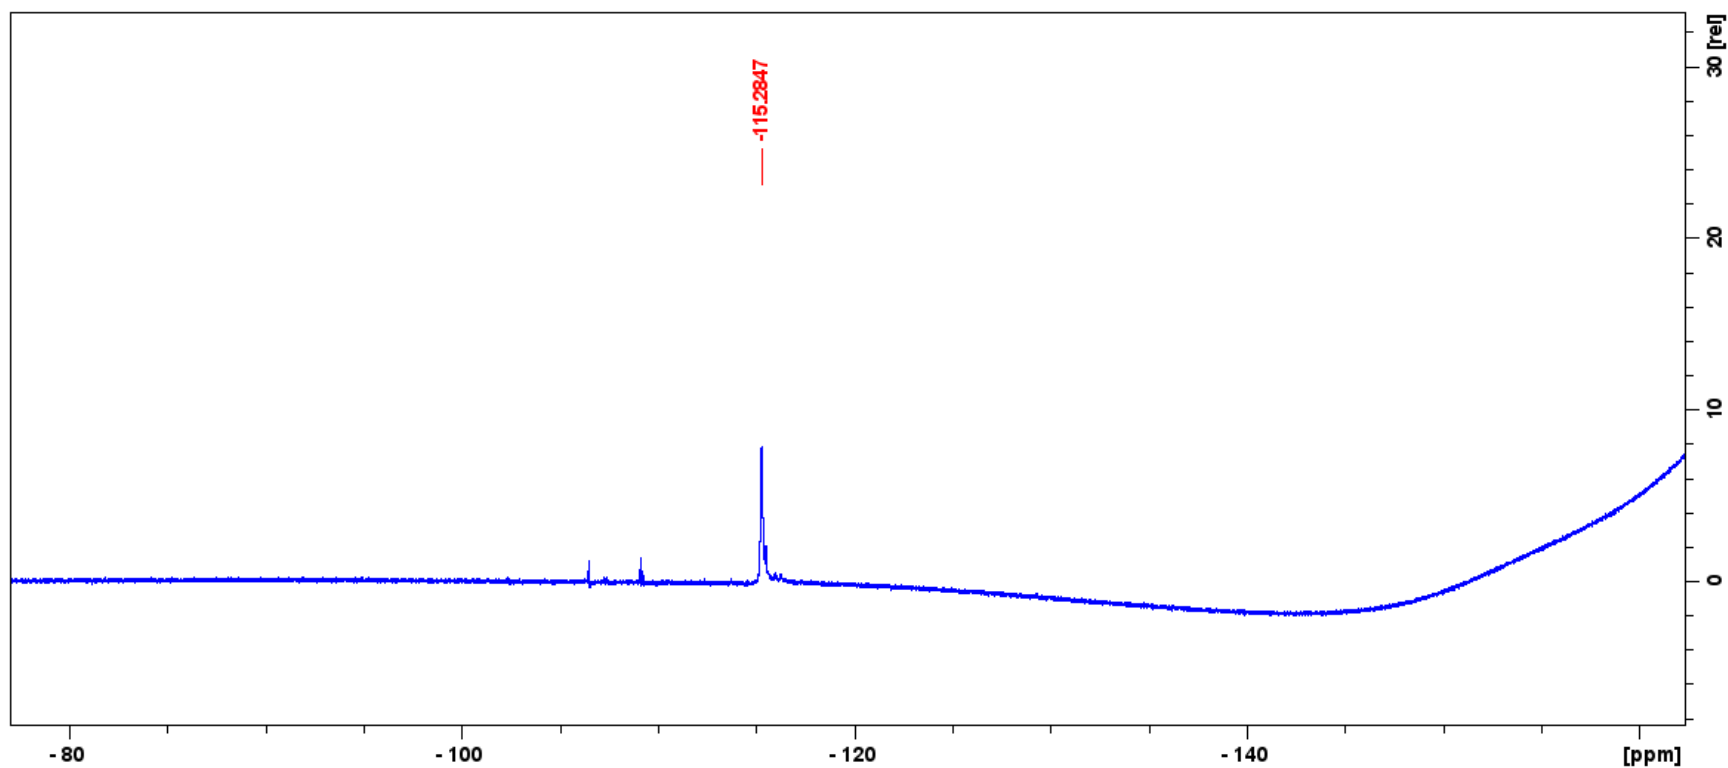

$^1\text{H}$ -NMR of compound (4*R*,4*aS*,6*aR*,8*R*,9*S*,11*aR*,11*bS*)-methyl 8-hydroxy-4,11*b*-dimethyl-9-((((*R*)-1-phenylpropyl)amino)methyl)tetradecahydro-6*a*,9-methanocyclohepta[*a*]naphthalene-4-carboxylate (**24**)

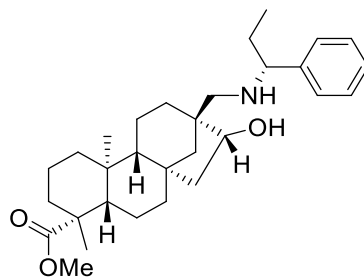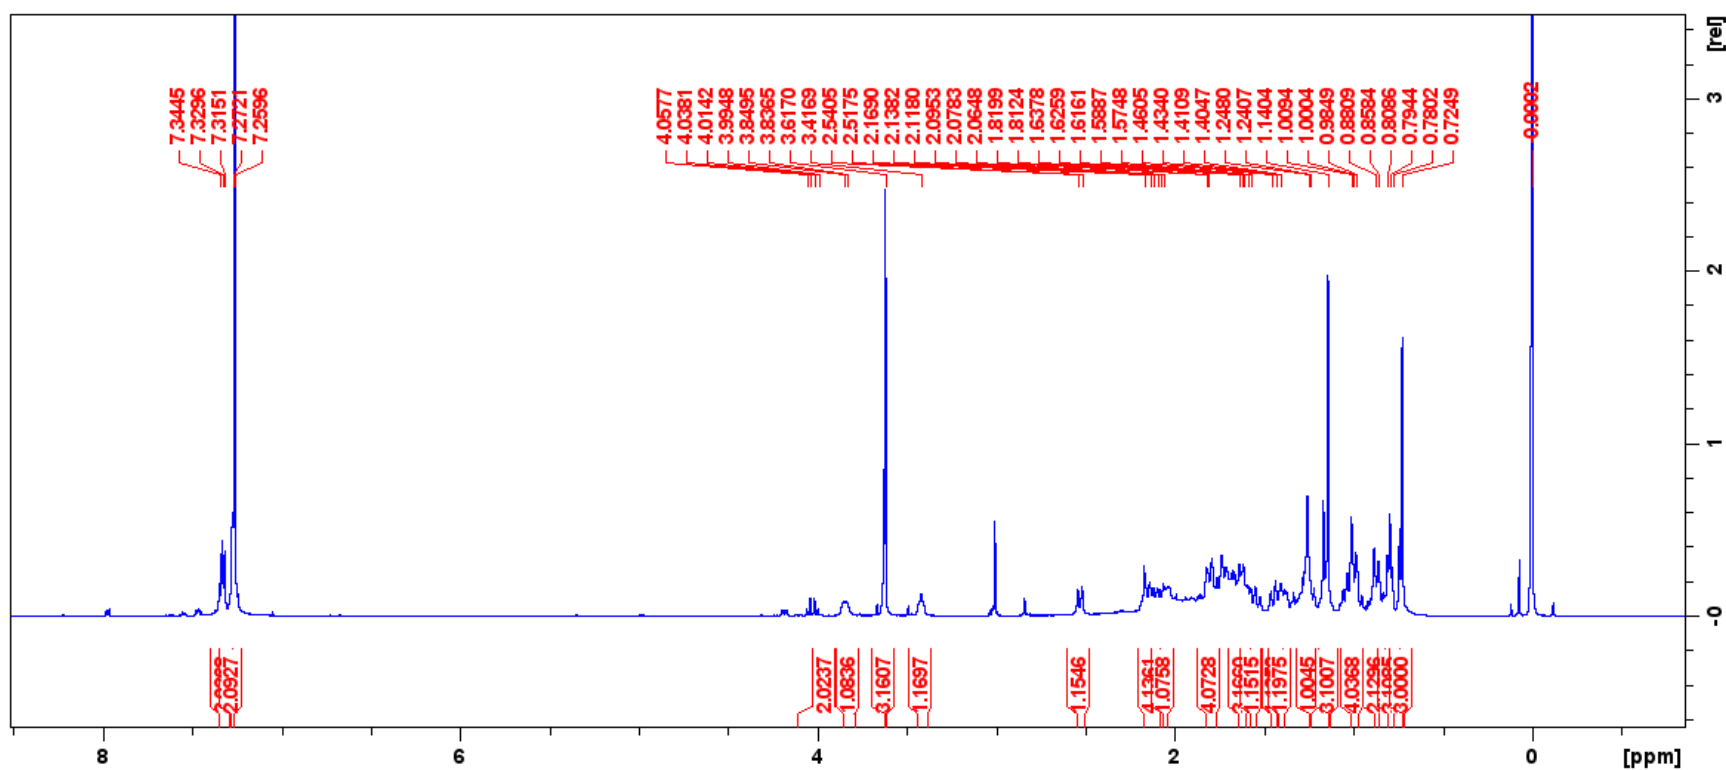

$^{13}\text{C}$ -NMR of compound (4*R*,4*aS*,6*aR*,8*R*,9*S*,11*aR*,11*bS*)-methyl 8-hydroxy-4,11*b*-dimethyl-9-((((*R*)-1-phenylpropyl)amino)methyl)tetradecahydro-6*a*,9-methanocyclohepta[*a*]naphthalene-4-carboxylate (**24**)

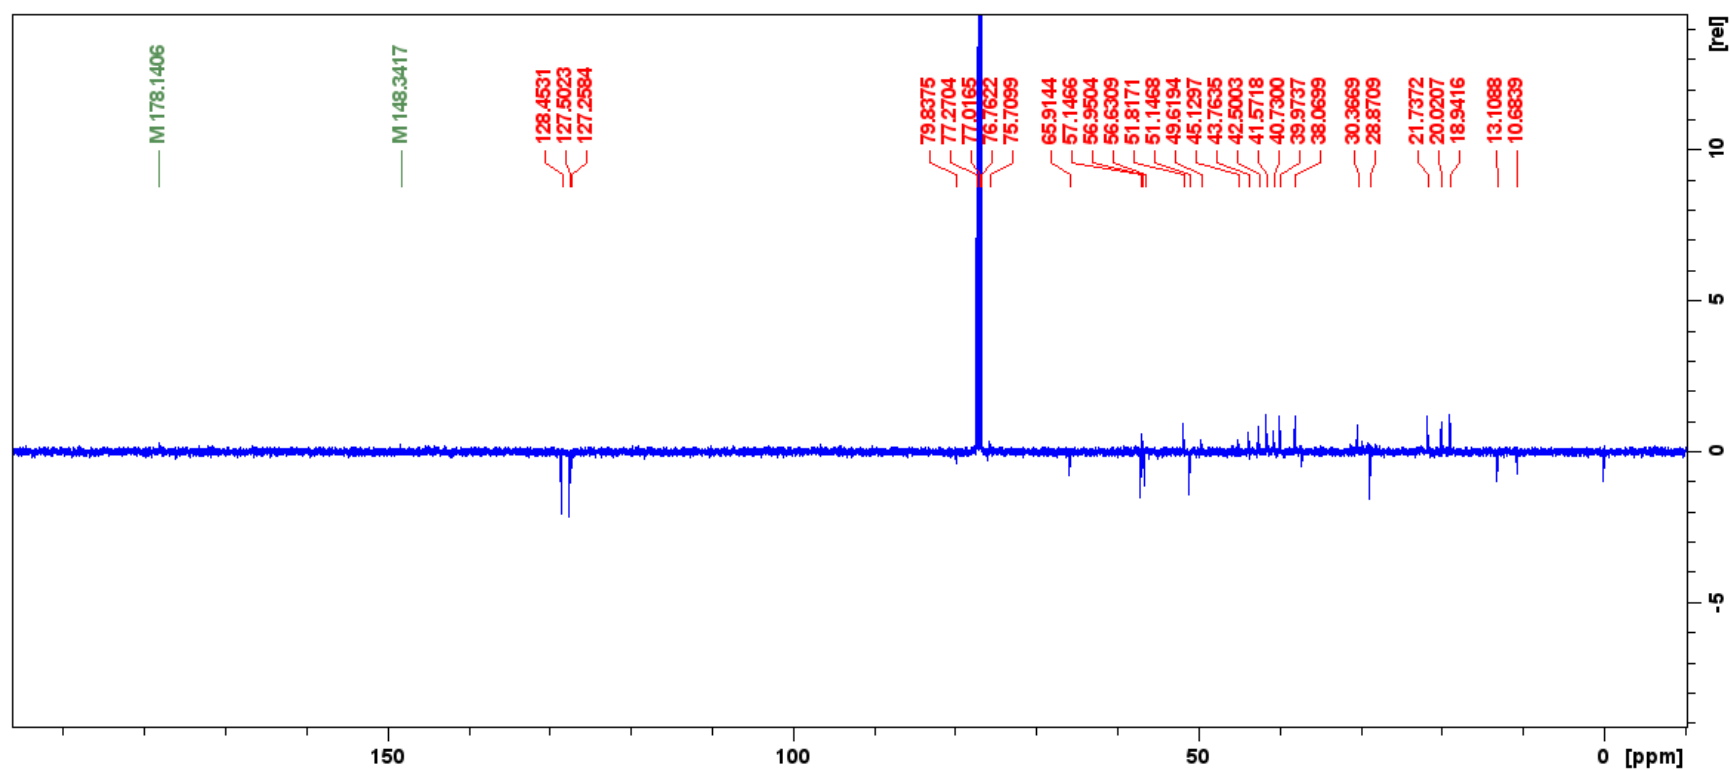

COSY of compound (4*R*,4*aS*,6*aR*,8*R*,9*S*,11*aR*,11*bS*)-methyl 8-hydroxy-4,11*b*-dimethyl-9-((((*R*)-1-phenylpropyl)amino)methyl)tetradecahydro-6*a*,9-methanocyclohepta[*a*]naphthalene-4-carboxylate (**24**)

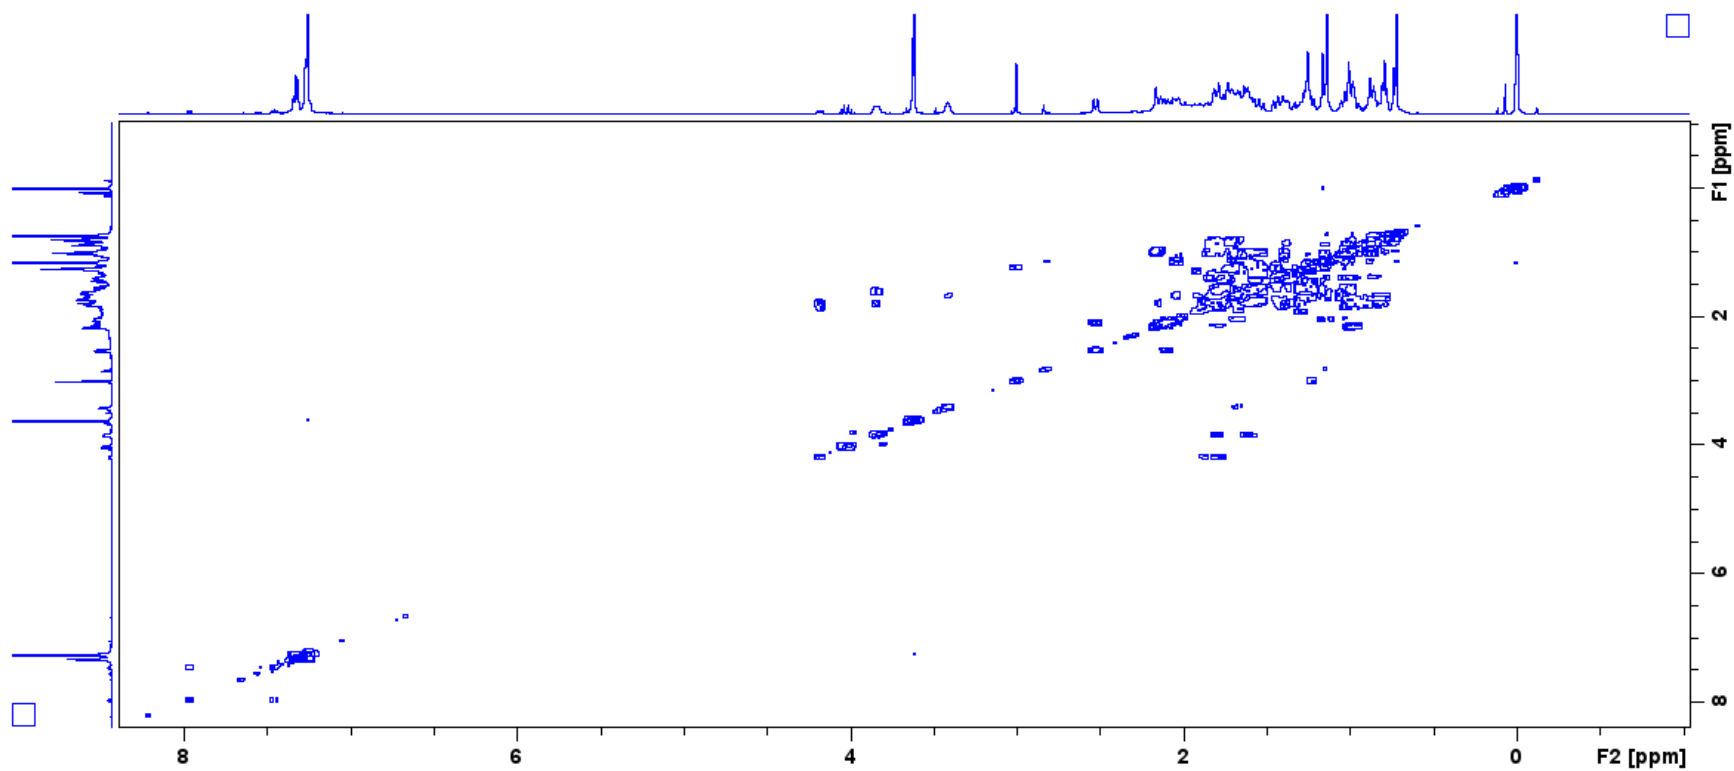

NOESY of compound (4*R*,4*aS*,6*aR*,8*R*,9*S*,11*aR*,11*bS*)-methyl 8-hydroxy-4,11*b*-dimethyl-9-(((*R*)-1-phenylpropyl)amino)methyl)tetradecahydro-6*a*,9-methanocyclohepta[*a*]naphthalene-4-carboxylate (**24**)

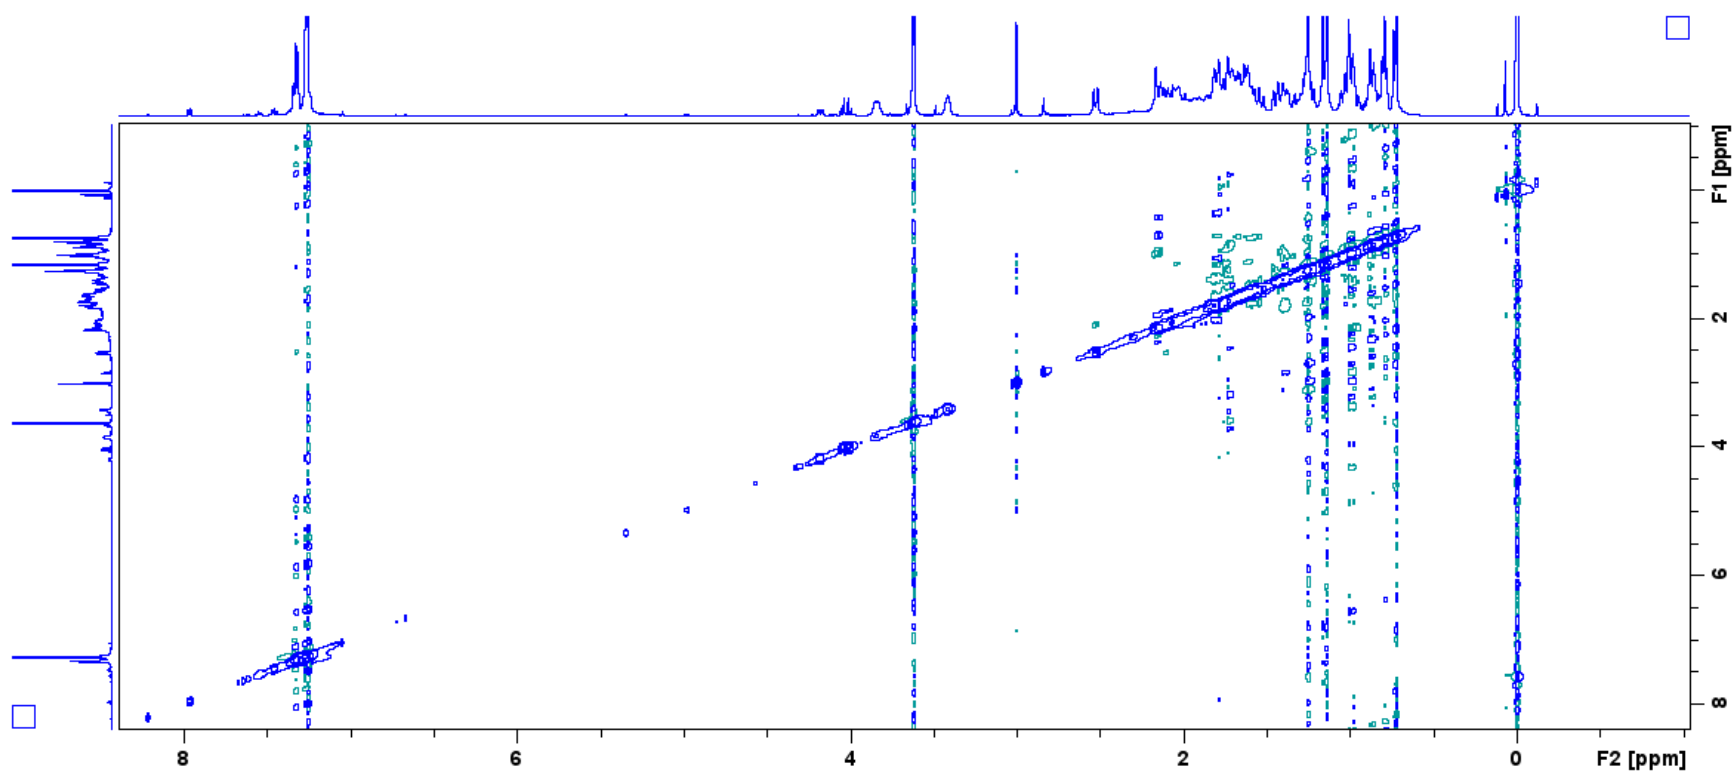

HSQC of compound (4*R*,4*aS*,6*aR*,8*R*,9*S*,11*aR*,11*bS*)-methyl 8-hydroxy-4,11*b*-dimethyl-9-((((*R*)-1-phenylpropyl)amino)methyl)tetradecahydro-6*a*,9-methanocyclohepta[*a*]naphthalene-4-carboxylate (**24**)

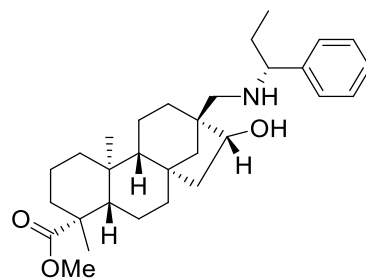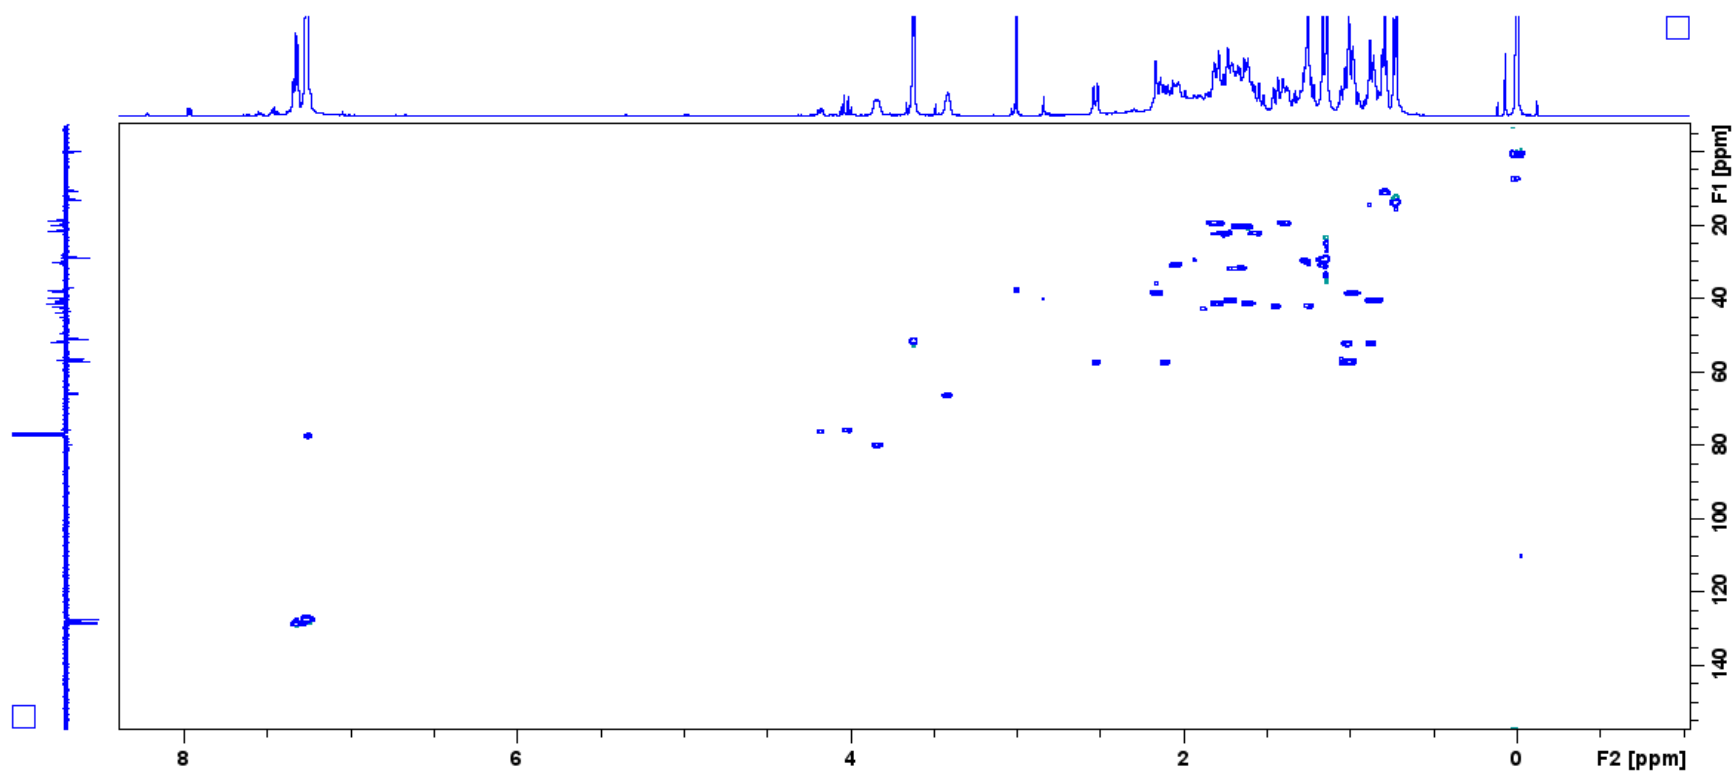



HMBC of compound (4*R*,4*aS*,6*aR*,8*R*,9*S*,11*aR*,11*bS*)-methyl 8-hydroxy-4,11*b*-dimethyl-9-((((*R*)-1-phenylpropyl)amino)methyl)tetradecahydro-6*a*,9-methanocyclohepta[*a*]naphthalene-4-carboxylate (**24**)

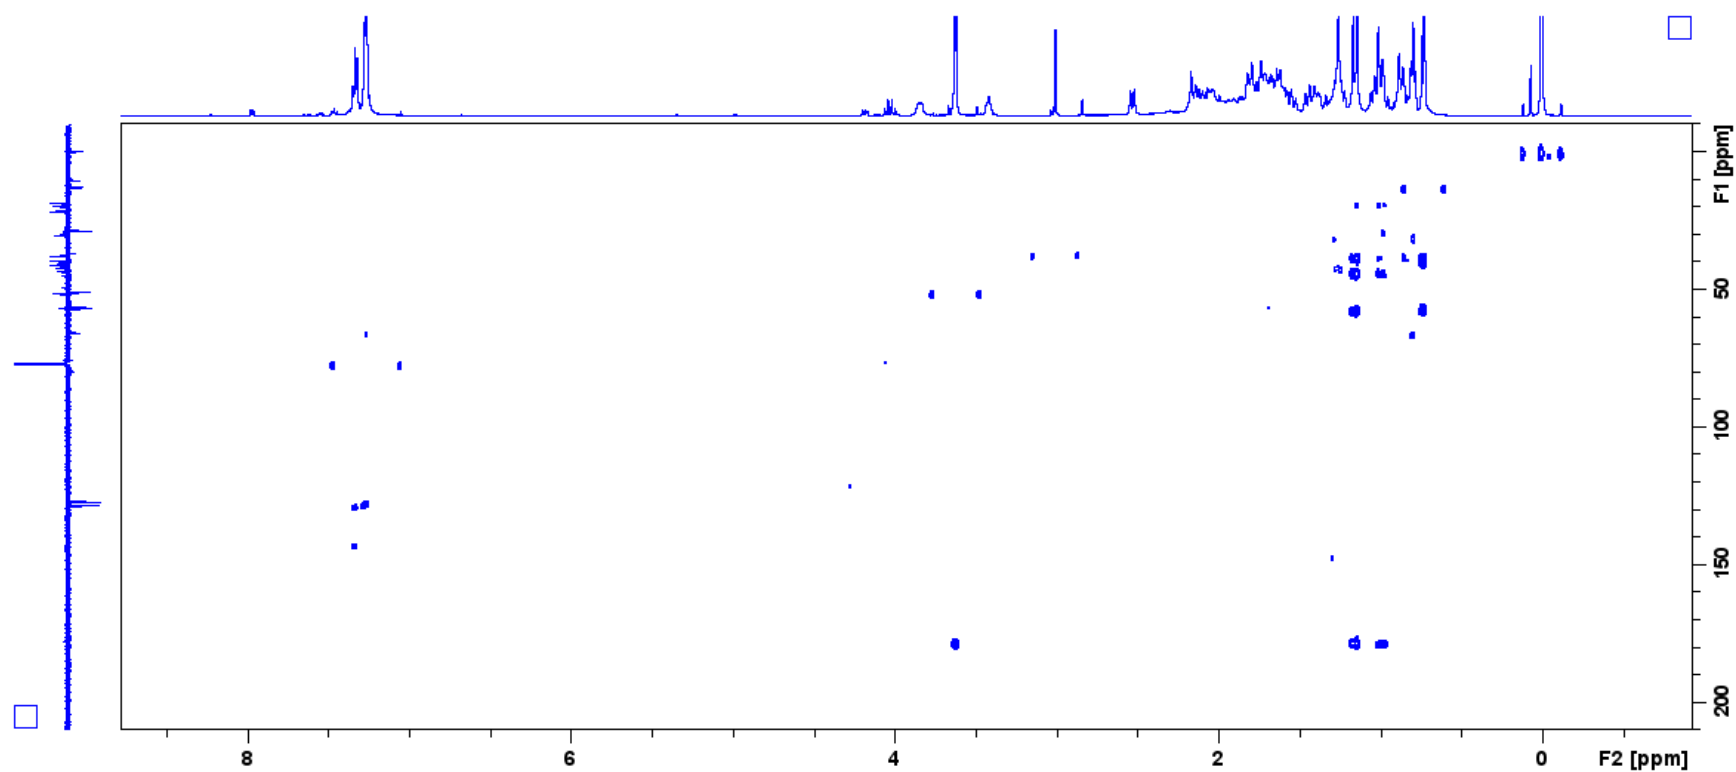

$^1\text{H}$ -NMR of compound (4*R*,4*aS*,6*aR*,8*R*,9*S*,11*aR*,11*bS*)-methyl 8-hydroxy-4,11*b*-dimethyl-9-((((*S*)-1-phenylpropyl)amino)methyl)tetradecahydro-6*a*,9-methanocyclohepta[*a*]naphthalene-4-carboxylate (**25**)

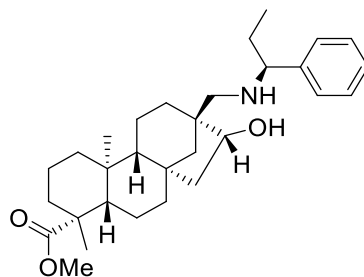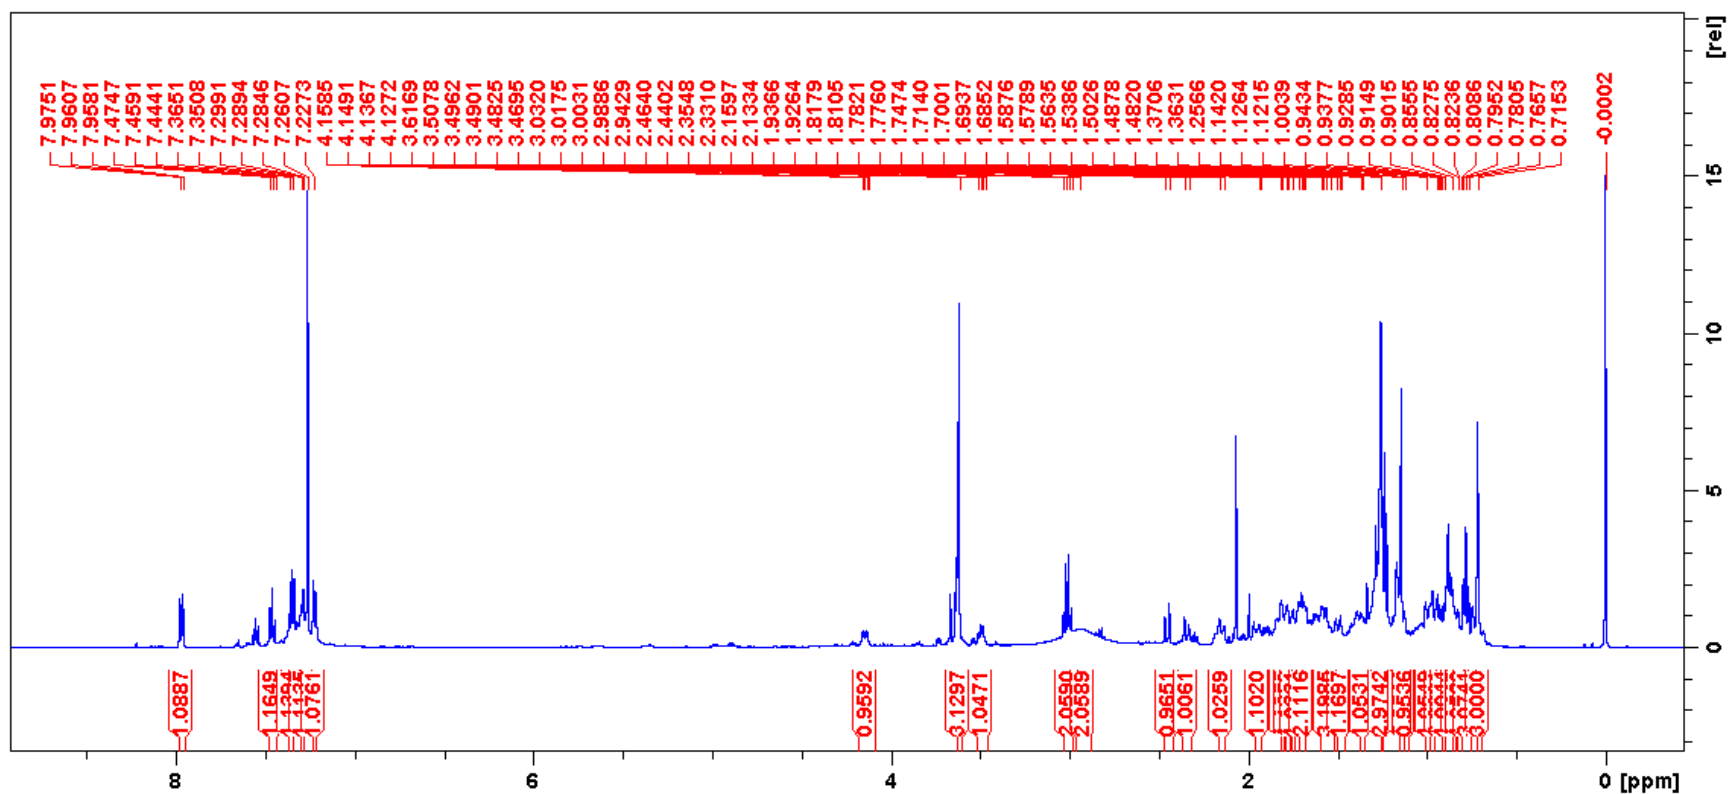

$^{13}\text{C}$ -NMR of compound (4*R*,4*aS*,6*aR*,8*R*,9*S*,11*aR*,11*bS*)-methyl 8-hydroxy-4,11*b*-dimethyl-9-((((*S*)-1-phenylpropyl)amino)methyl)tetradecahydro-6*a*,9-methanocyclohepta[*a*]naphthalene-4-carboxylate (**25**)

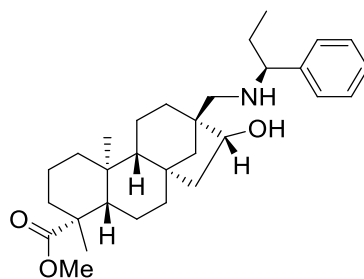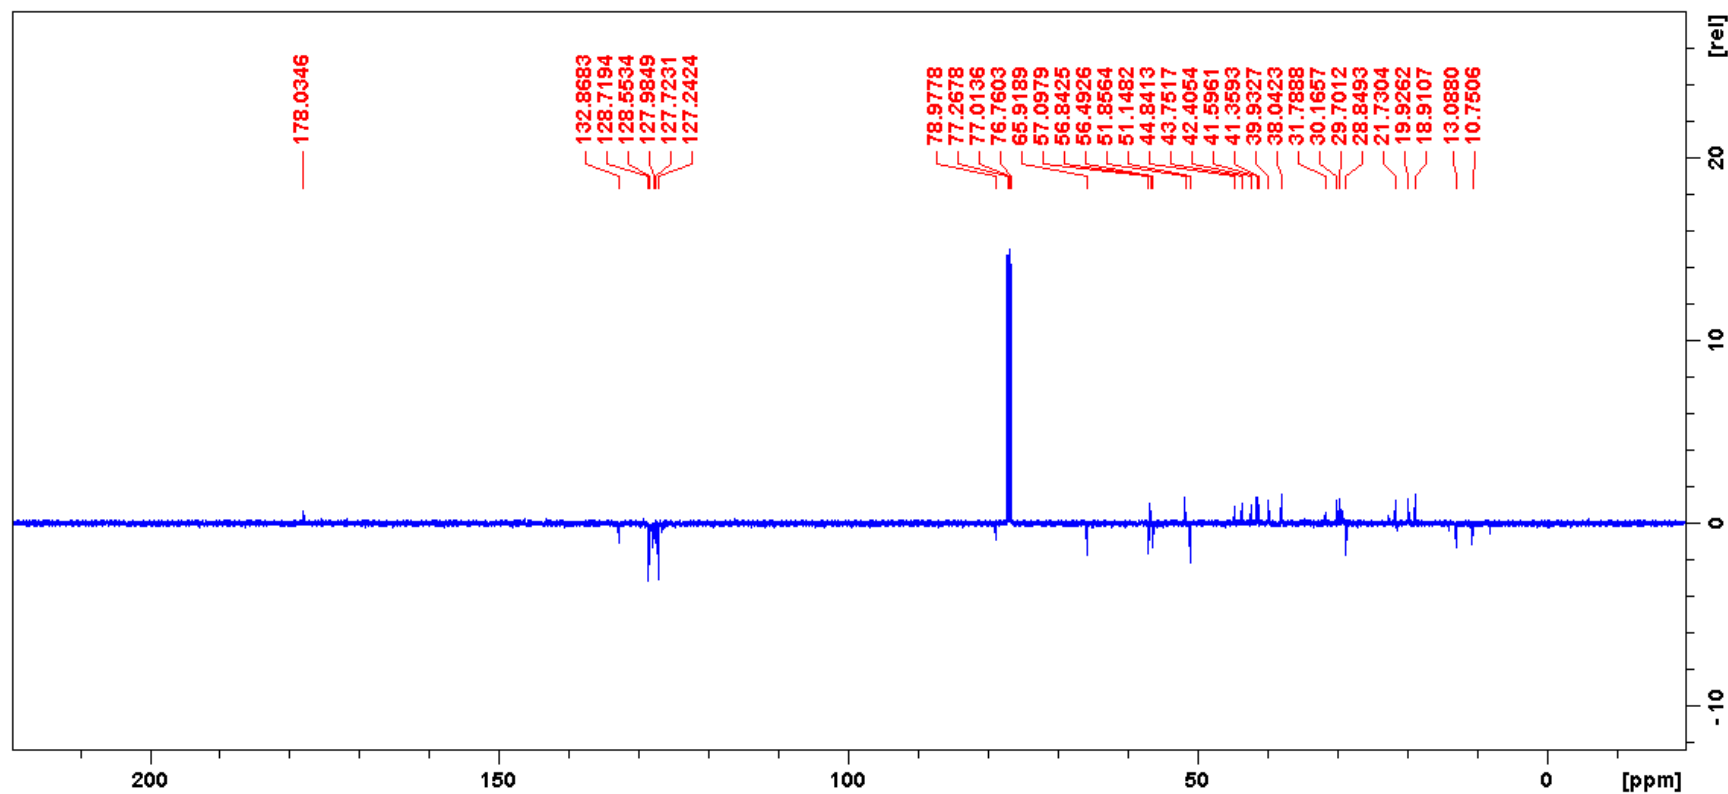

COSY of compound (4*R*,4*aS*,6*aR*,8*R*,9*S*,11*aR*,11*bS*)-methyl 8-hydroxy-4,11*b*-dimethyl-9-((((*S*)-1-phenylpropyl)amino)methyl)tetradecahydro-6*a*,9-methanocyclohepta[*a*]naphthalene-4-carboxylate (**25**)

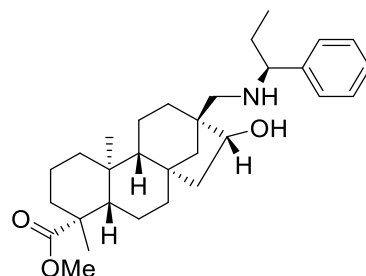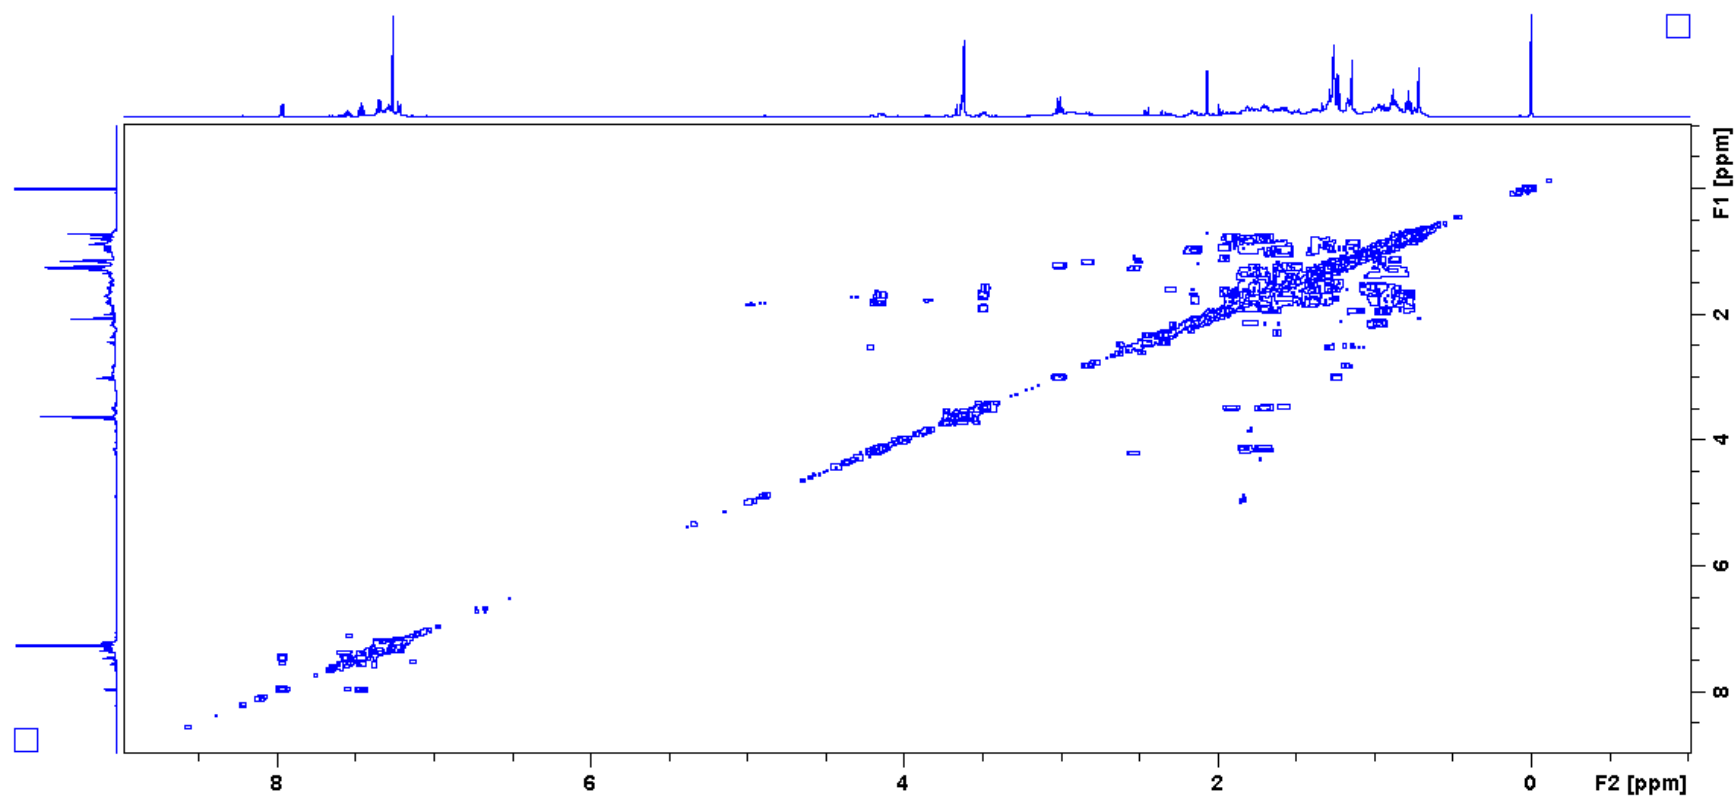

NOESY of compound (4*R*,4*aS*,6*aR*,8*R*,9*S*,11*aR*,11*bS*)-methyl 8-hydroxy-4,11*b*-dimethyl-9-((((*S*)-1-phenylpropyl)amino)methyl)tetradecahydro-6*a*,9-methanocyclohepta[*a*]naphthalene-4-carboxylate (**25**)

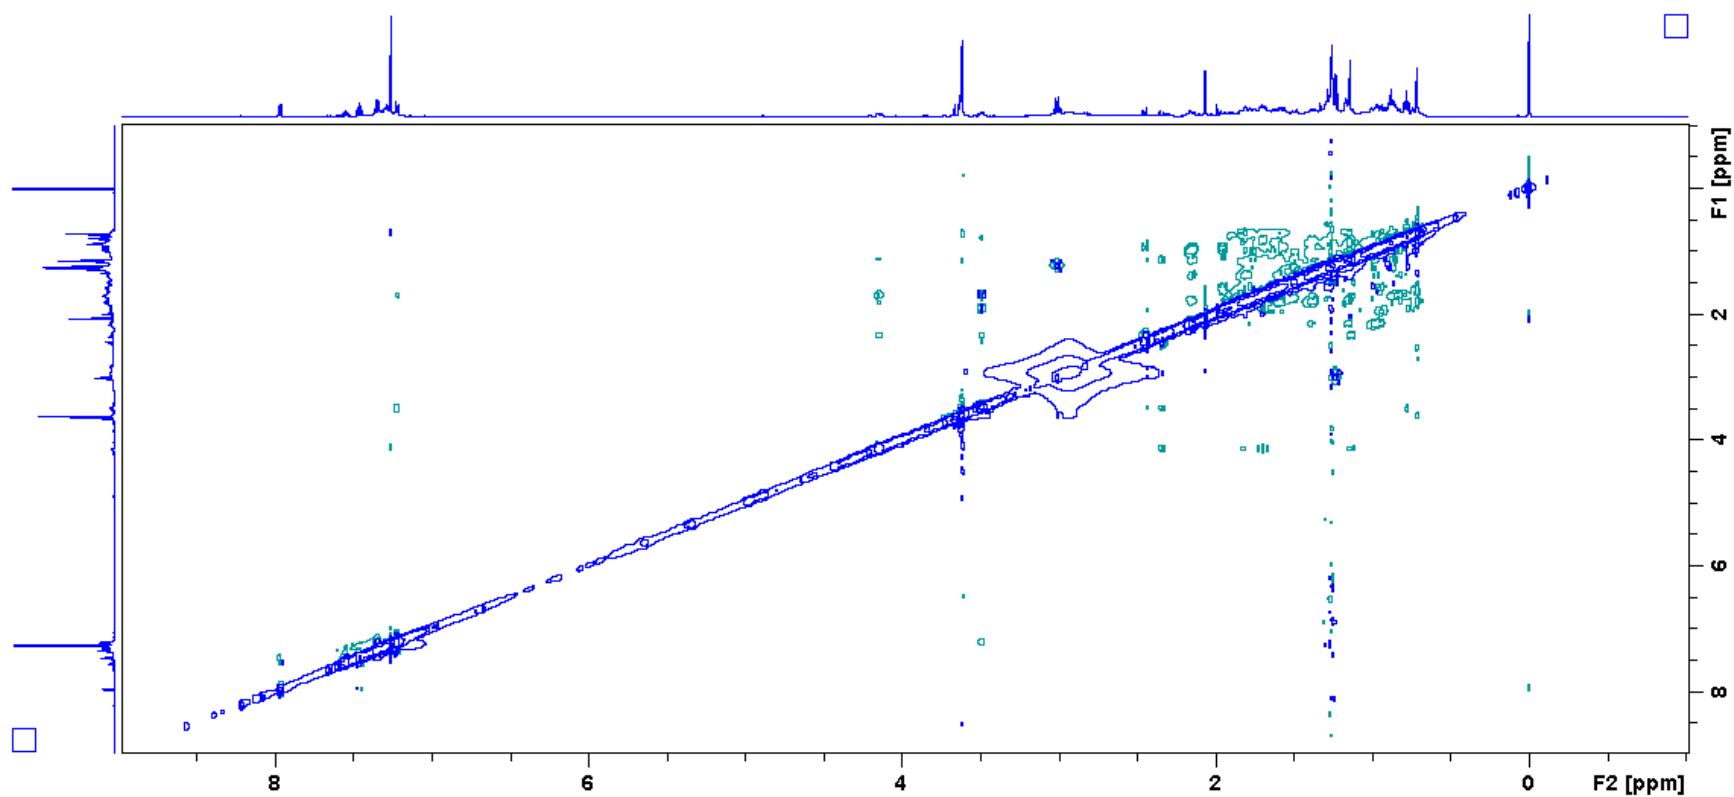

HSQC of compound (4*R*,4*aS*,6*aR*,8*R*,9*S*,11*aR*,11*bS*)-methyl 8-hydroxy-4,11*b*-dimethyl-9-((((*S*)-1-phenylpropyl)amino)methyl)tetradecahydro-6*a*,9-methanocyclohepta[*a*]naphthalene-4-carboxylate (**25**)

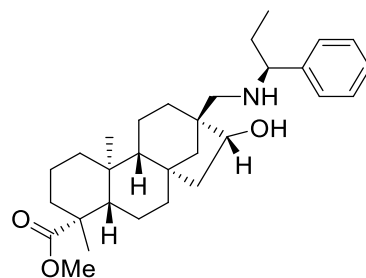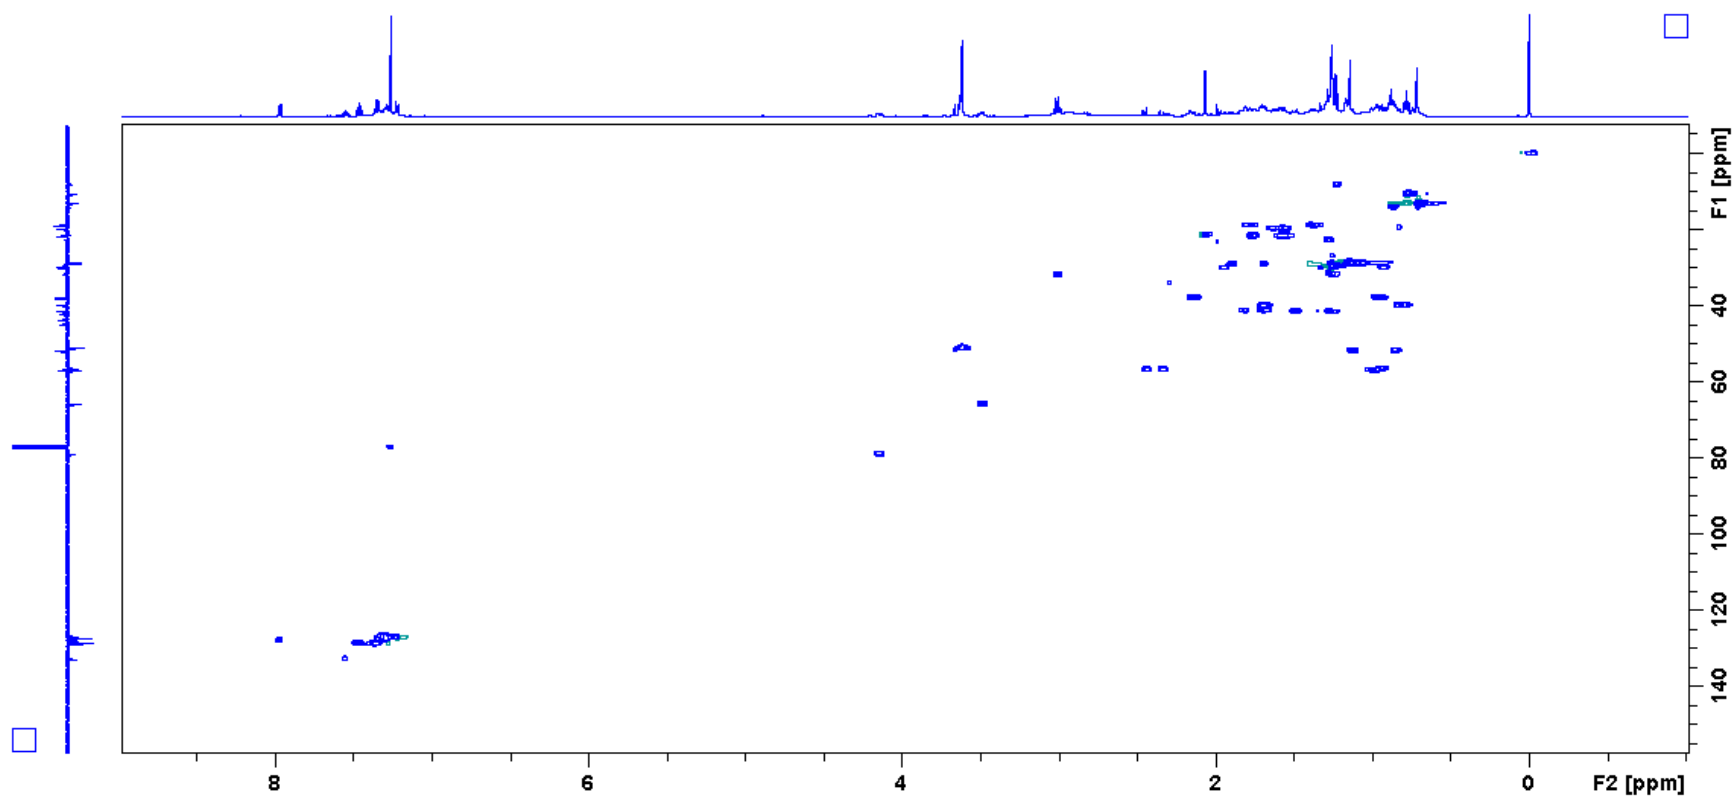

HMBC of compound (4*R*,4*aS*,6*aR*,8*R*,9*S*,11*aR*,11*bS*)-methyl 8-hydroxy-4,11*b*-dimethyl-9-((((*S*)-1-phenylpropyl)amino)methyl)tetradecahydro-6*a*,9-methanocyclohepta[*a*]naphthalene-4-carboxylate (**25**)

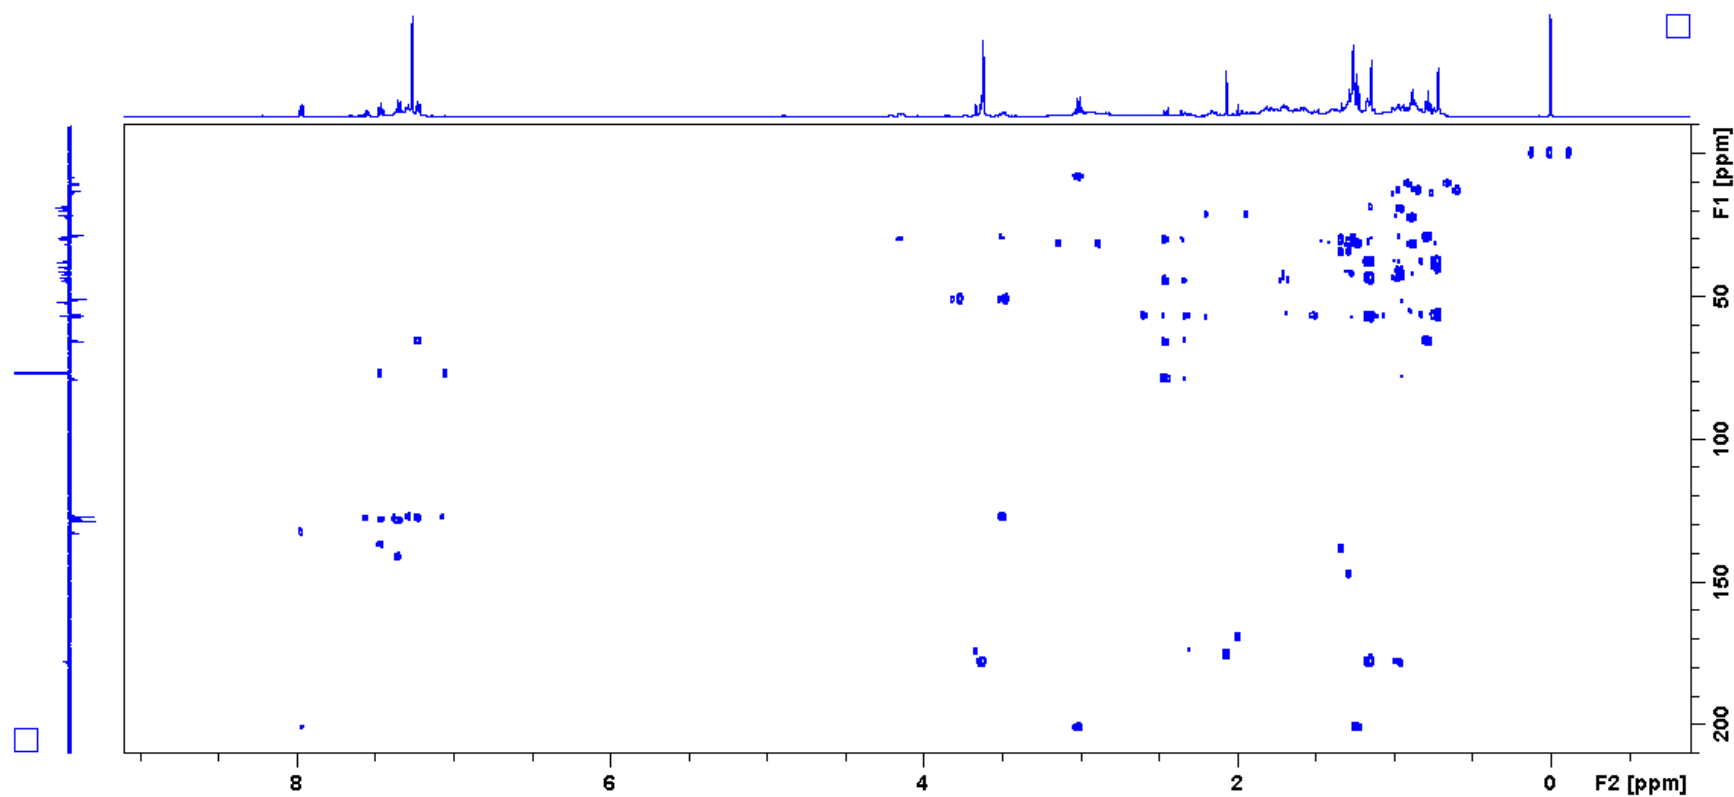

$^1\text{H}$ -NMR of compound (4*R*,4*aS*,6*aR*,8*R*,9*S*,11*aR*,11*bS*)-methyl 8-hydroxy-4,11*b*-dimethyl-9-(((naphthalen-1-ylmethyl)amino)methyl)tetradecahydro-6*a*,9-methanocyclohepta[*a*]naphthalene-4-carboxylate (**26**)

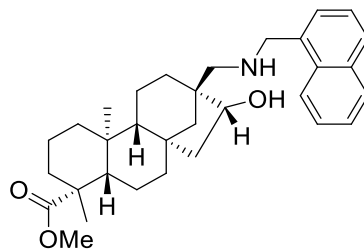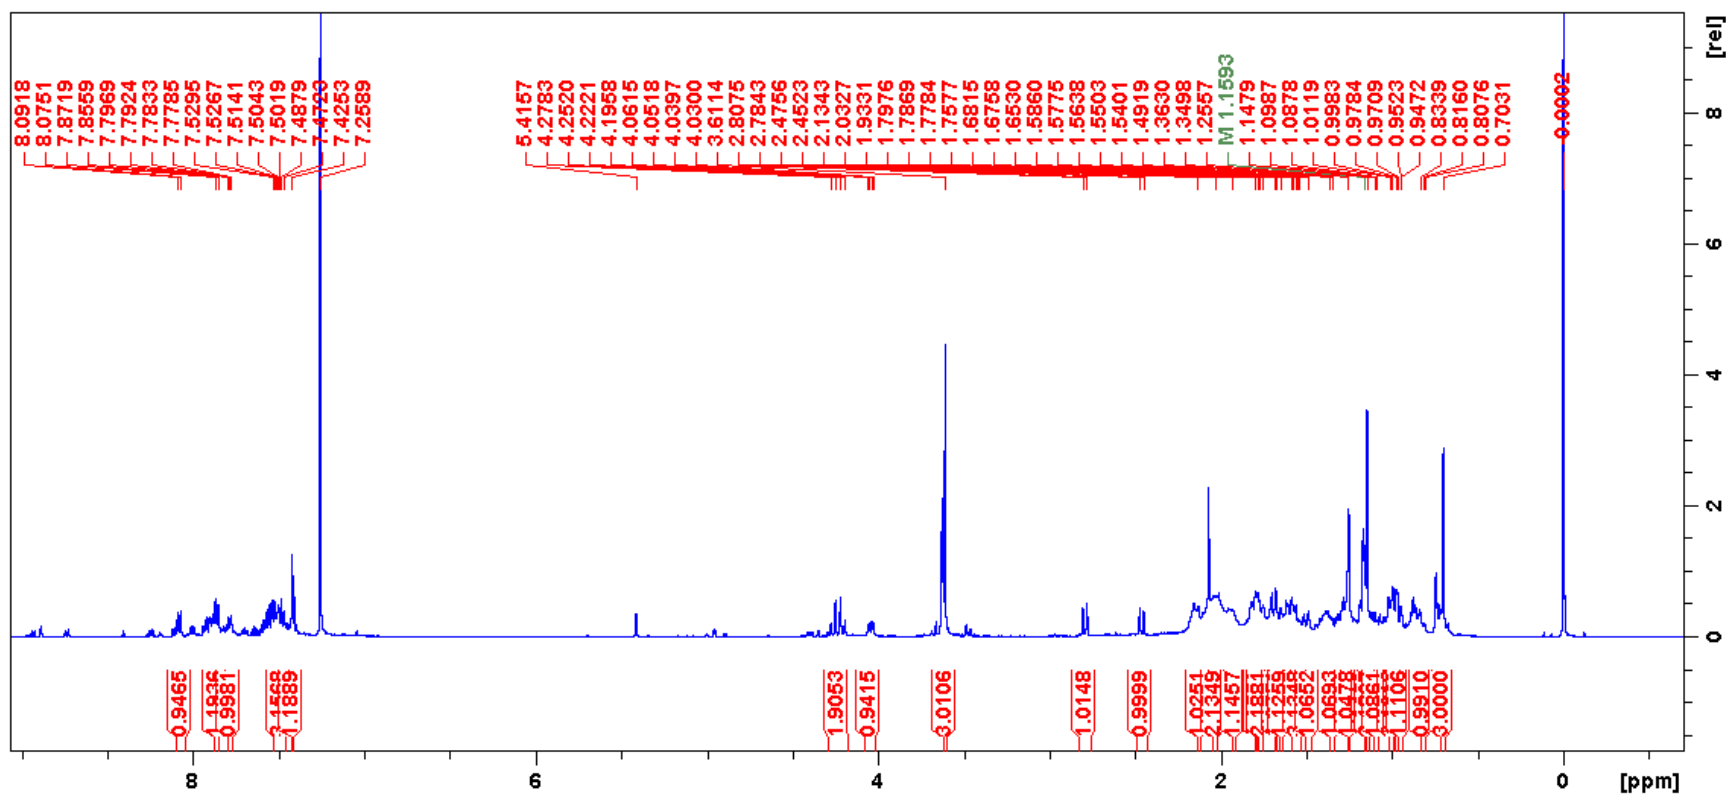



$^{13}\text{C}$ -NMR of compound (4*R*,4*aS*,6*aR*,8*R*,9*S*,11*aR*,11*bS*)-methyl 8-hydroxy-4,11*b*-dimethyl-9-(((naphthalen-1-ylmethyl)amino)methyl)tetradecahydro-6*a*,9-methanocyclohepta[*a*]naphthalene-4-carboxylate (**26**)

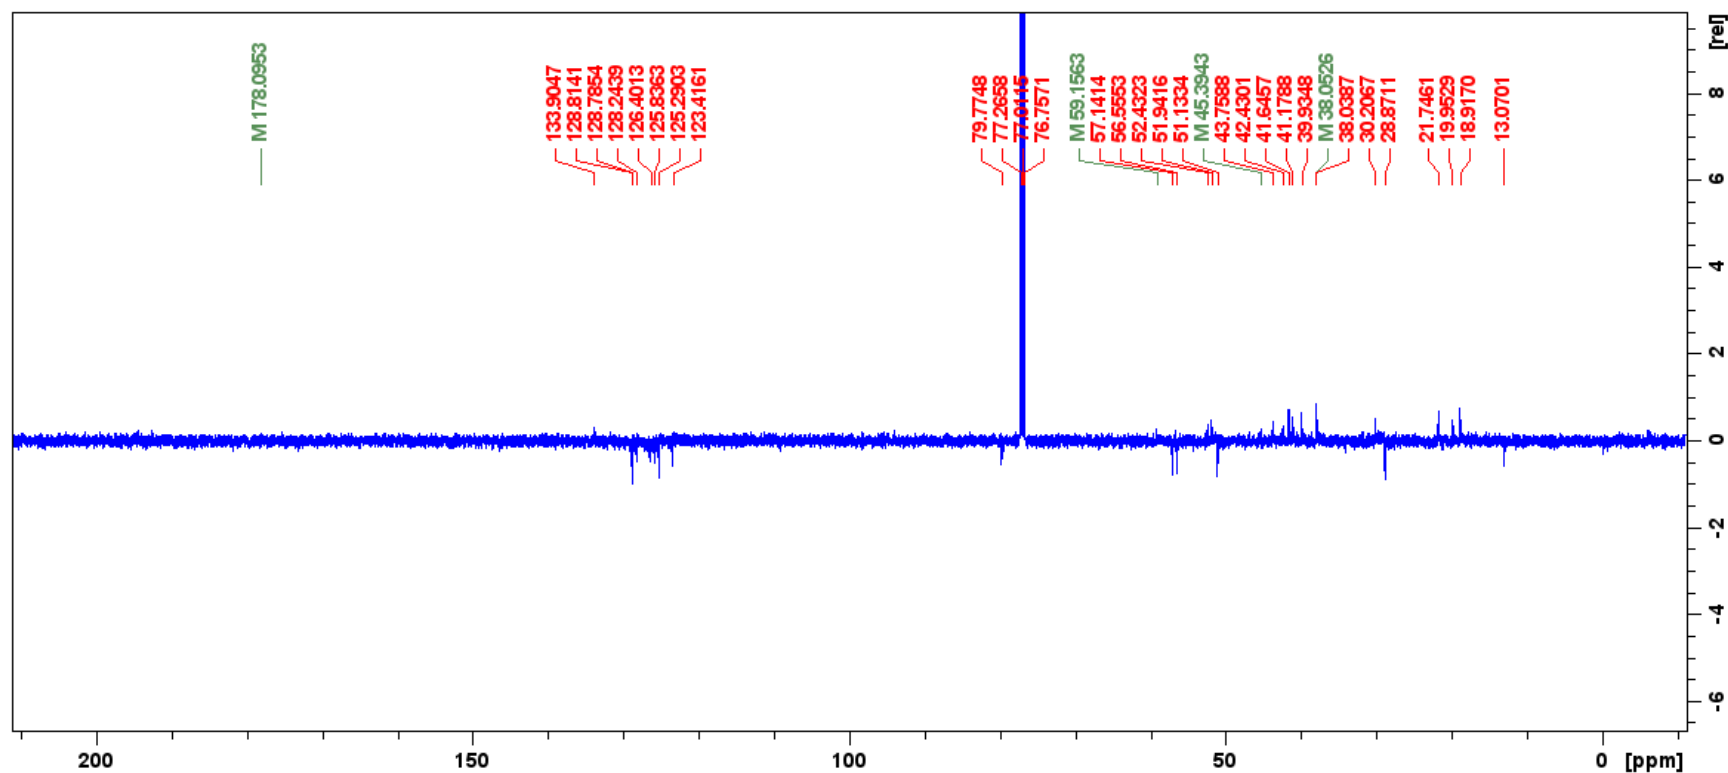

COSY of compound (4*R*,4*aS*,6*aR*,8*R*,9*S*,11*aR*,11*bS*)-methyl 8-hydroxy-4,11*b*-dimethyl-9-(((naphthalen-1-ylmethyl)amino)methyl)tetradecahydro-6*a*,9-methanocyclohepta[*a*]naphthalene-4-carboxylate (**26**)

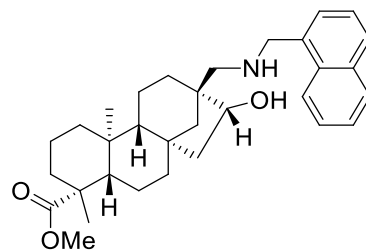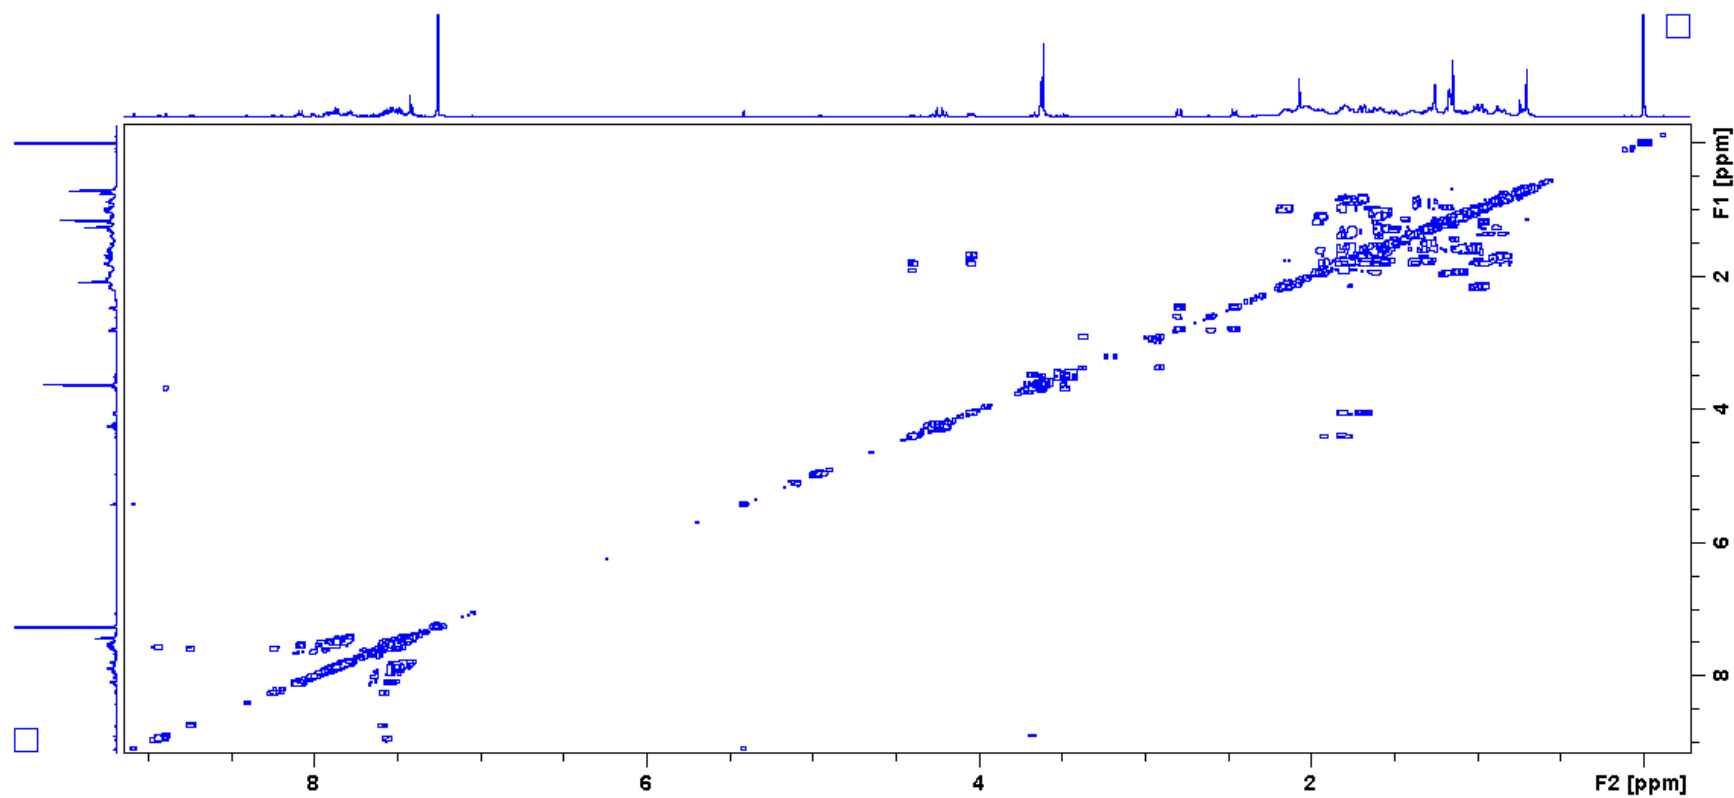

NOESY of compound (4*R*,4*aS*,6*aR*,8*R*,9*S*,11*aR*,11*bS*)-methyl 8-hydroxy-4,11b-dimethyl-9-(((naphthalen-1-ylmethyl)amino)methyl)tetradecahydro-6*a*,9-methanocyclohepta[*a*]naphthalene-4-carboxylate (**26**)

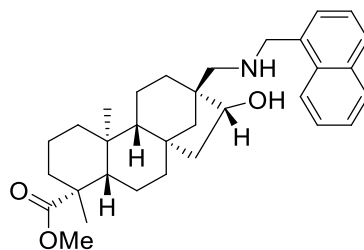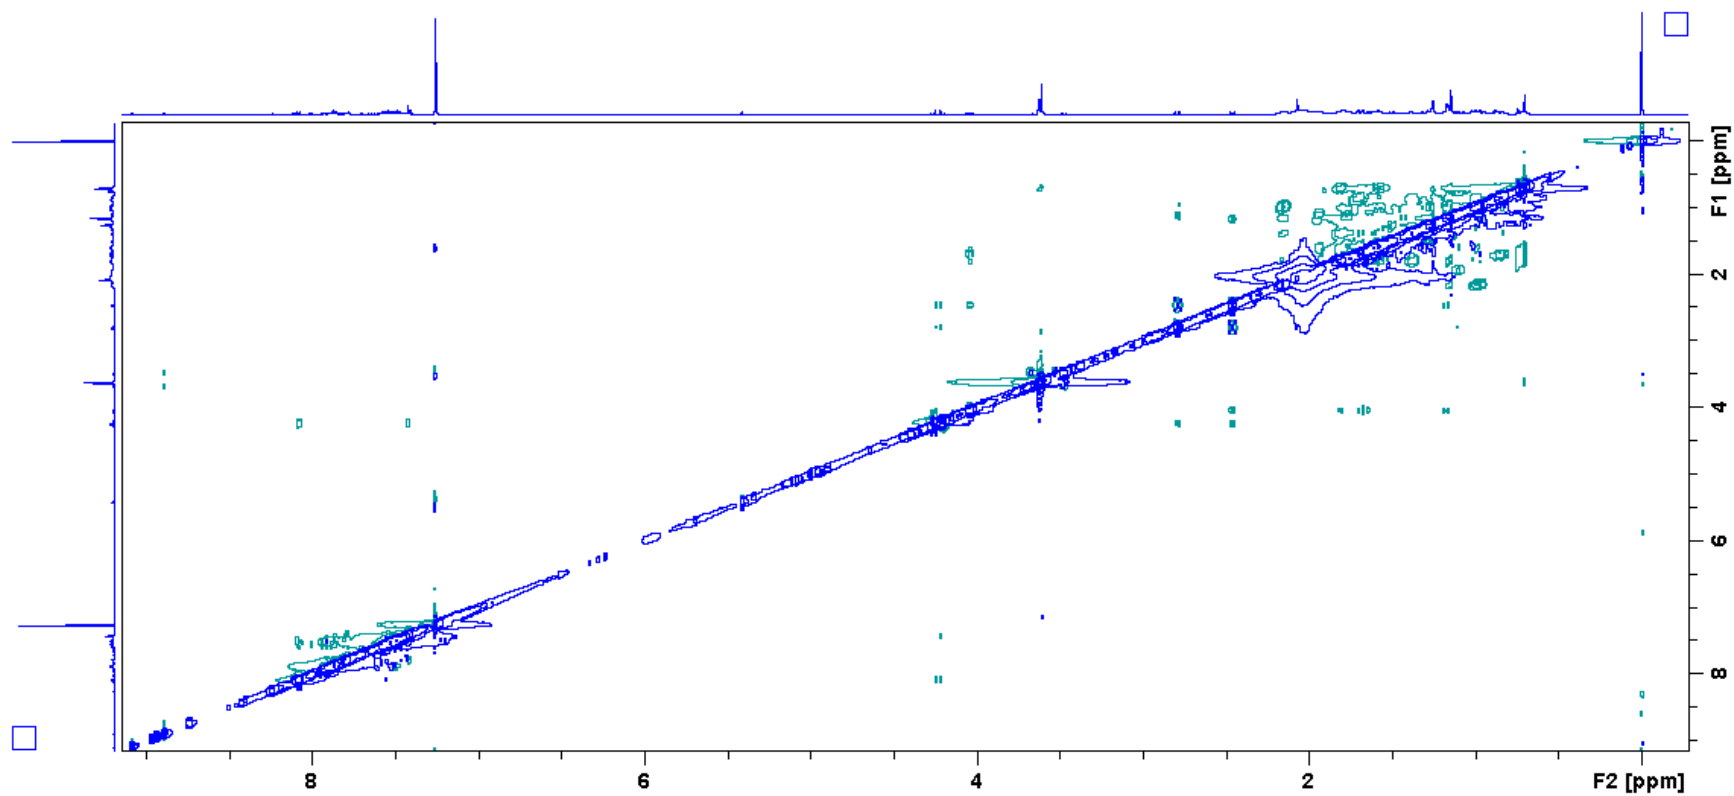

HSQC of compound (4*R*,4*aS*,6*aR*,8*R*,9*S*,11*aR*,11*bS*)-methyl 8-hydroxy-4,11*b*-dimethyl-9-(((naphthalen-1-ylmethyl)amino)methyl)tetradecahydro-6*a*,9-methanocyclohepta[*a*]naphthalene-4-carboxylate (**26**)

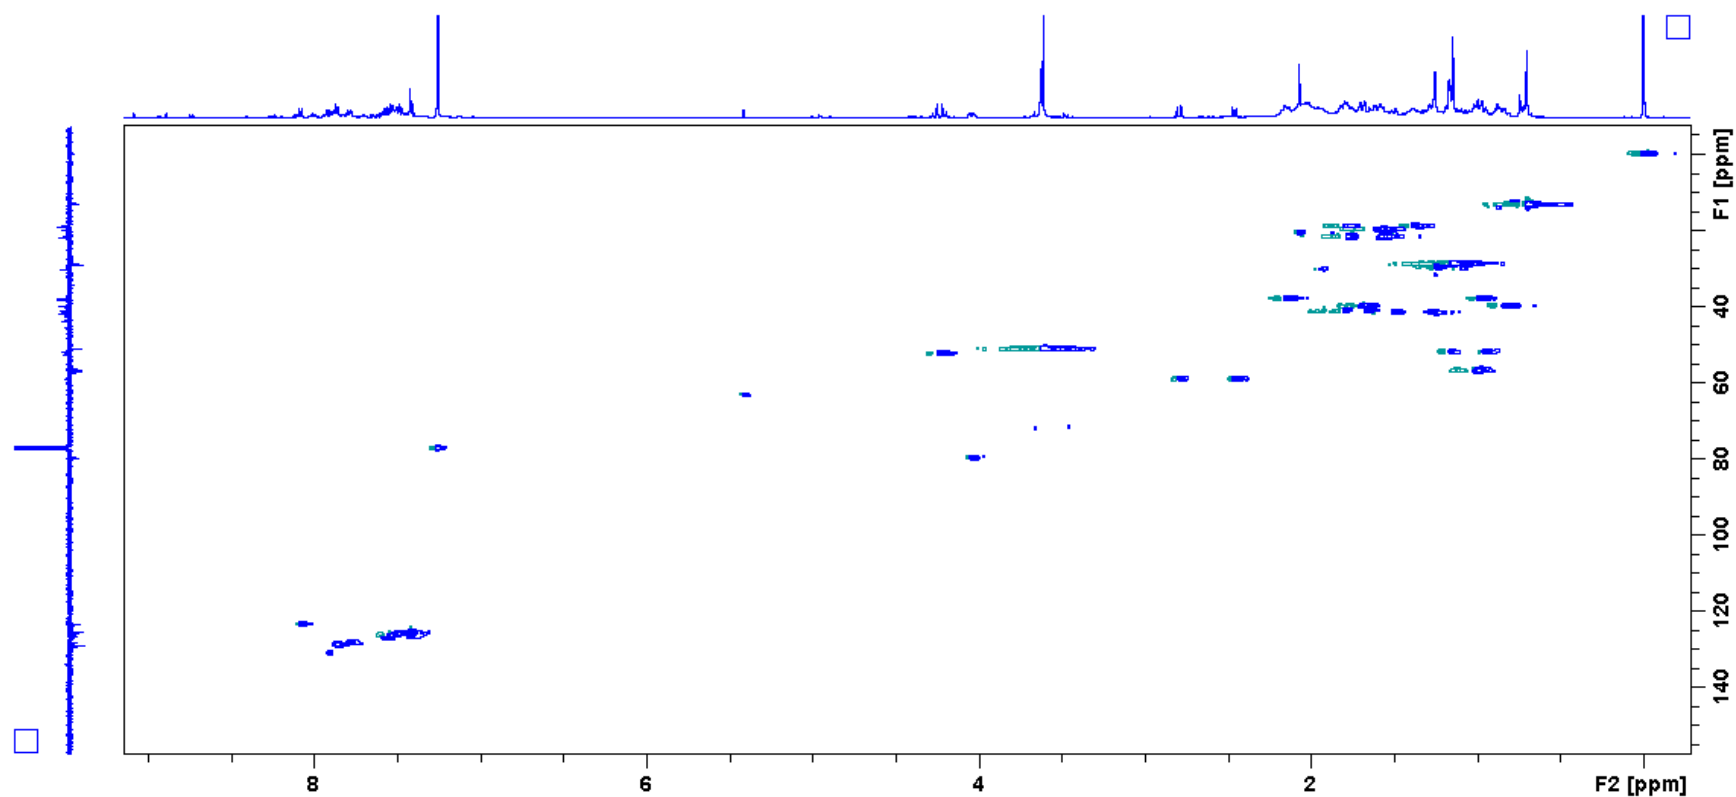

HMBC of compound (4*R*,4*aS*,6*aR*,8*R*,9*S*,11*aR*,11*bS*)-methyl 8-hydroxy-4,11*b*-dimethyl-9-(((naphthalen-1-ylmethyl)amino)methyl)tetradecahydro-6*a*,9-methanocyclohepta[*a*]naphthalene-4-carboxylate (**26**)

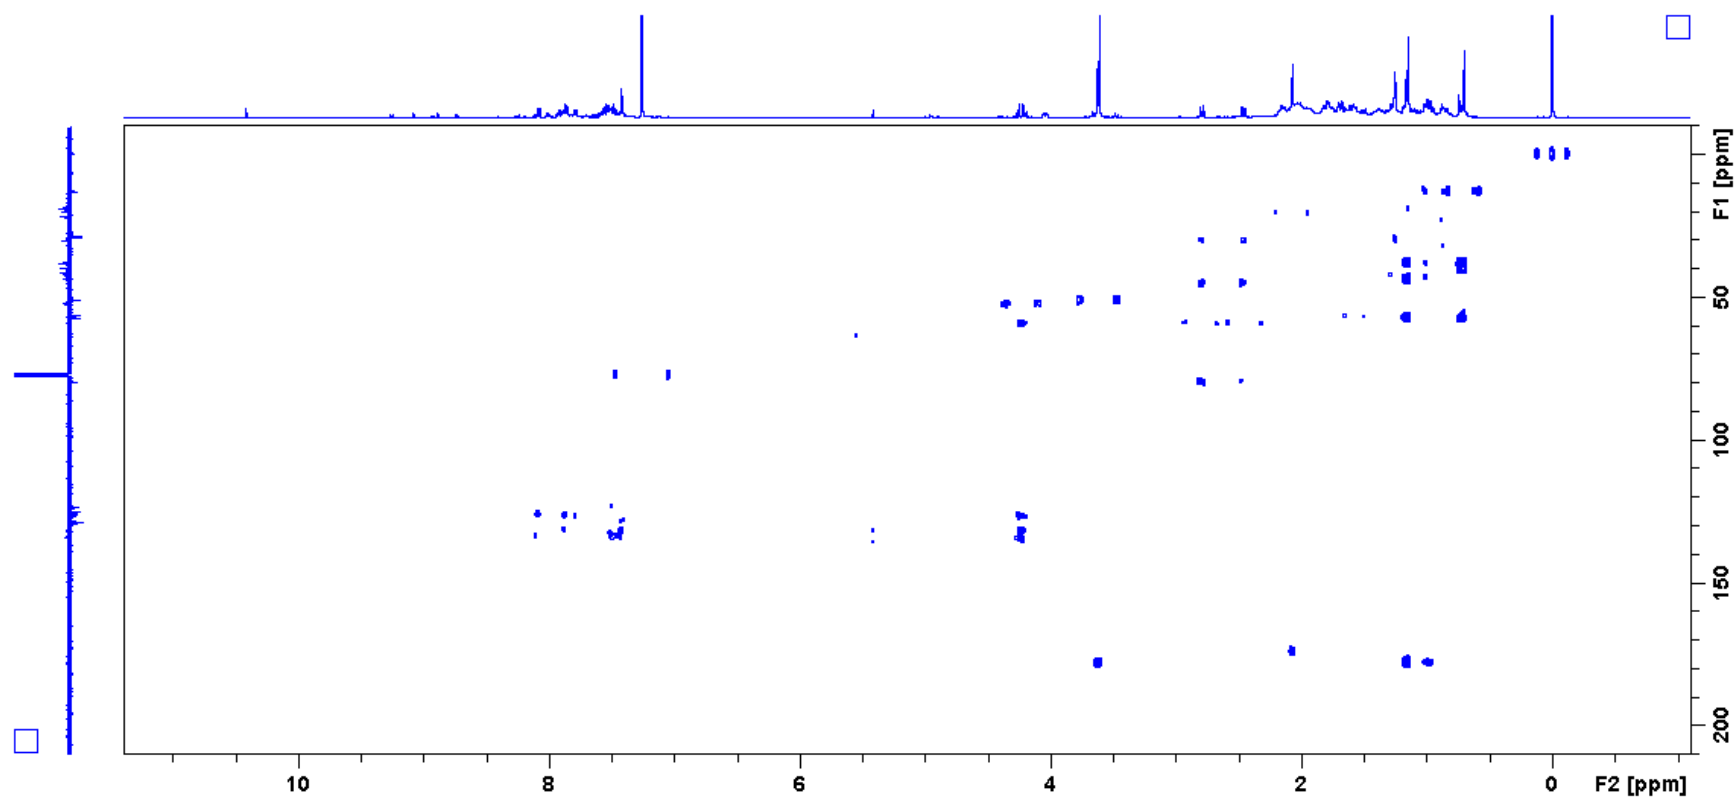

$^1\text{H}$ -NMR of compound (4*R*,4*aS*,6*aR*,8*R*,9*S*,11*aR*,11*bS*)-methyl 8-hydroxy-4,11*b*-dimethyl-9-((((*S*)-1-(naphthalen-1-yl)ethyl)amino)methyl)tetradecahydro-6*a*,9-methanocyclohepta[*a*]naphthalene-4-carboxylate (**27**)

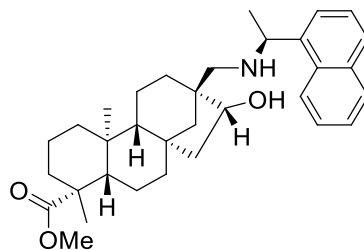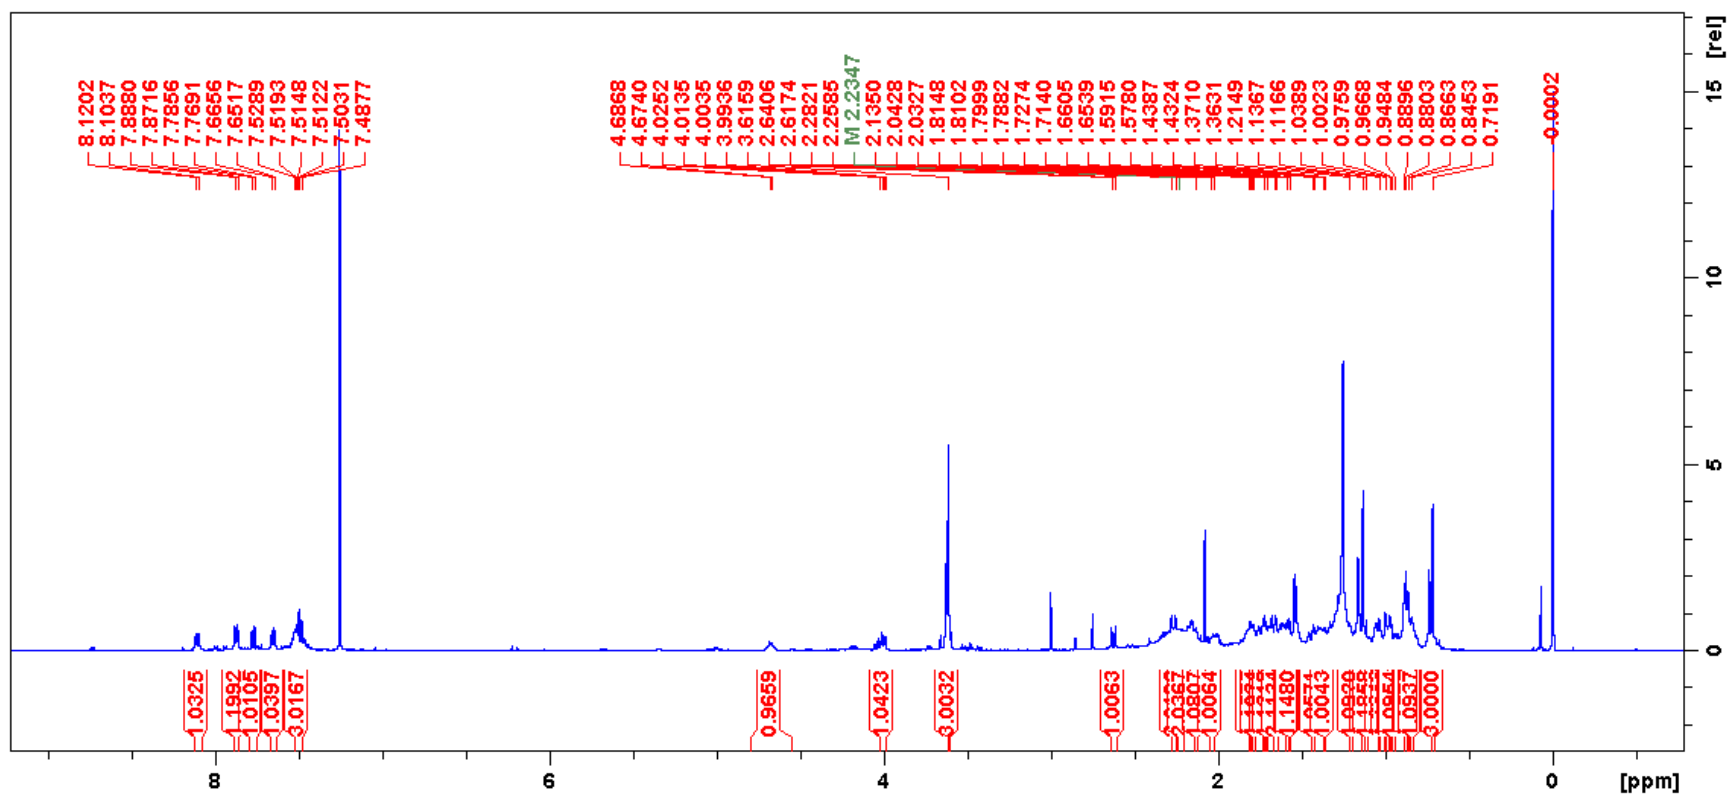

$^{13}\text{C}$ -NMR of compound (4*R*,4*aS*,6*aR*,8*R*,9*S*,11*aR*,11*bS*)-methyl 8-hydroxy-4,11*b*-dimethyl-9-((((*S*)-1-(naphthalen-1-yl)ethyl)amino)methyl)tetradecahydro-6*a*,9-methanocyclohepta[*a*]naphthalene-4-carboxylate (**27**)

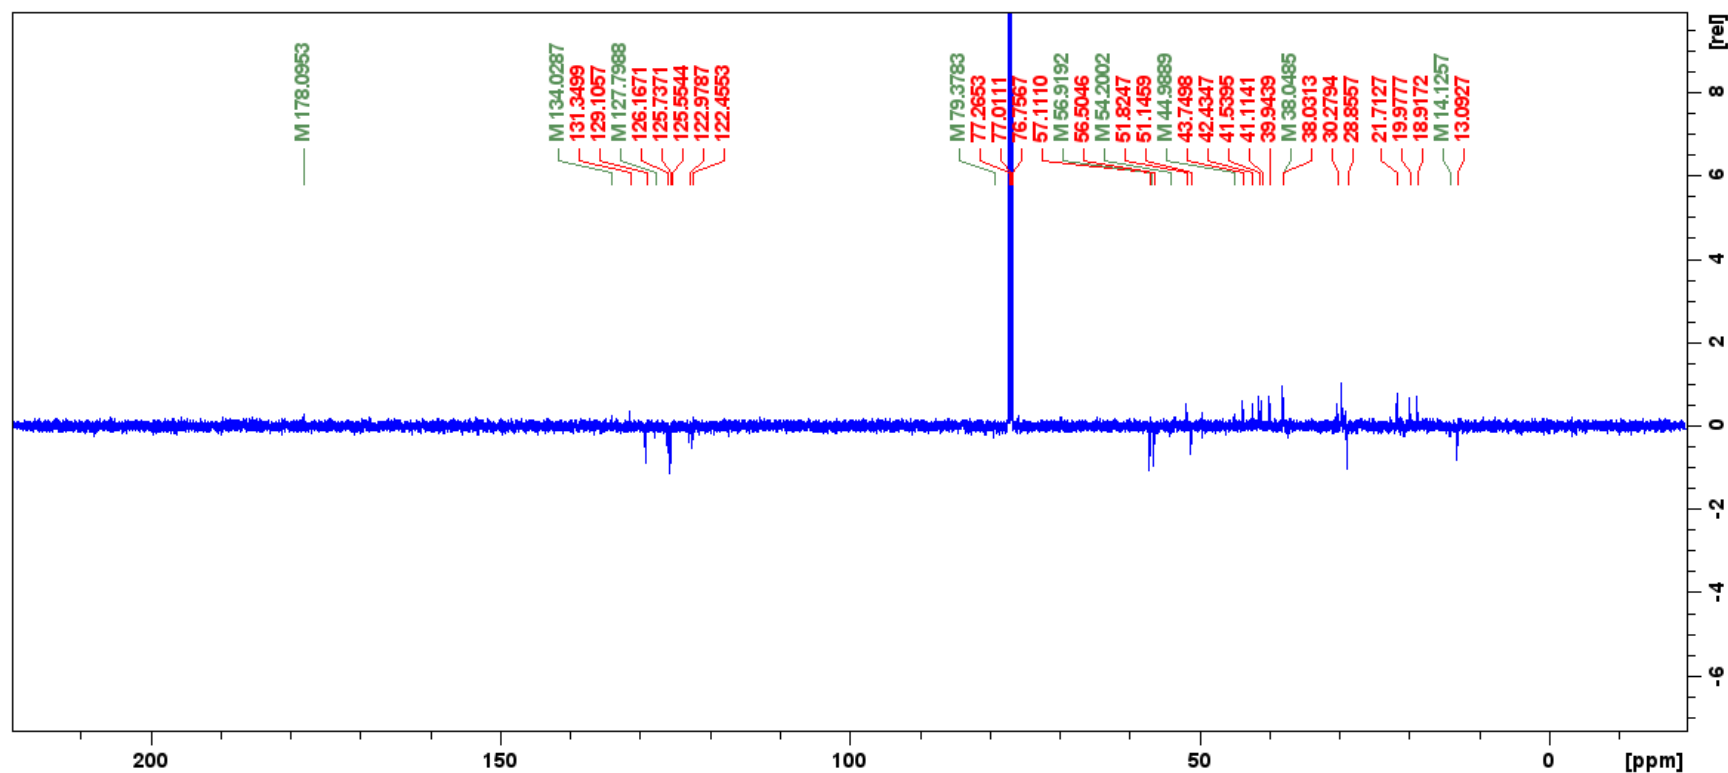

COSY of compound (4*R*,4*aS*,6*aR*,8*R*,9*S*,11*aR*,11*bS*)-methyl 8-hydroxy-4,11*b*-dimethyl-9-((((*S*)-1-(naphthalen-1-yl)ethyl)amino)methyl)tetradecahydro-6*a*,9-methanocyclohepta[*a*]naphthalene-4-carboxylate (**27**)

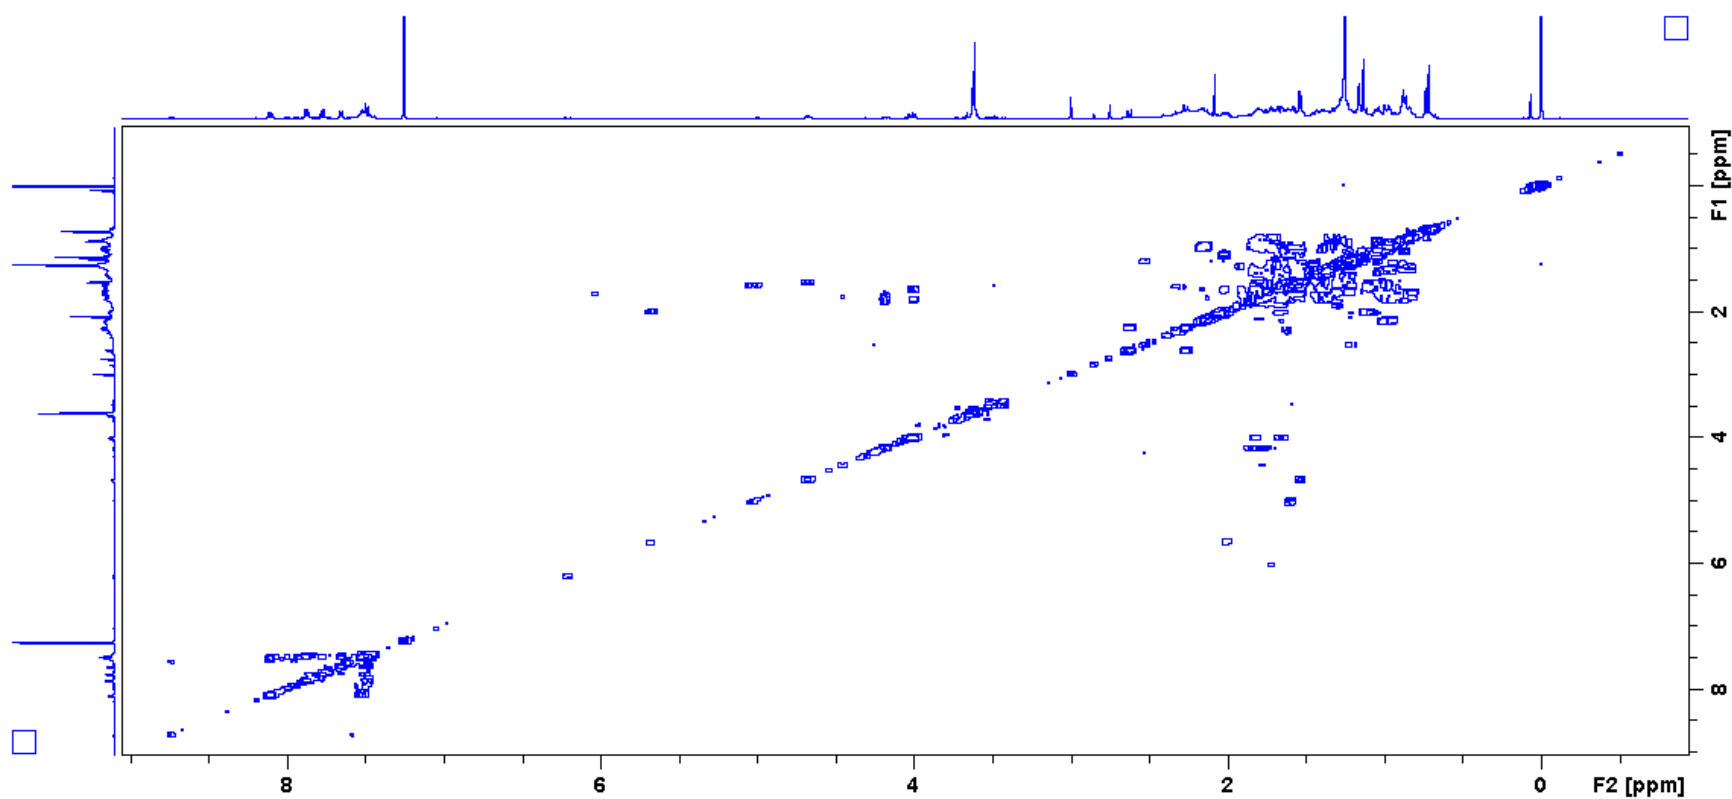



NOESY of compound (4*R*,4*aS*,6*aR*,8*R*,9*S*,11*aR*,11*bS*)-methyl 8-hydroxy-4,11b-dimethyl-9-(((*S*)-1-(naphthalen-1-yl)ethyl)amino)methyl)tetradecahydro-6*a*,9-methanocyclohepta[*a*]naphthalene-4-carboxylate (**27**)

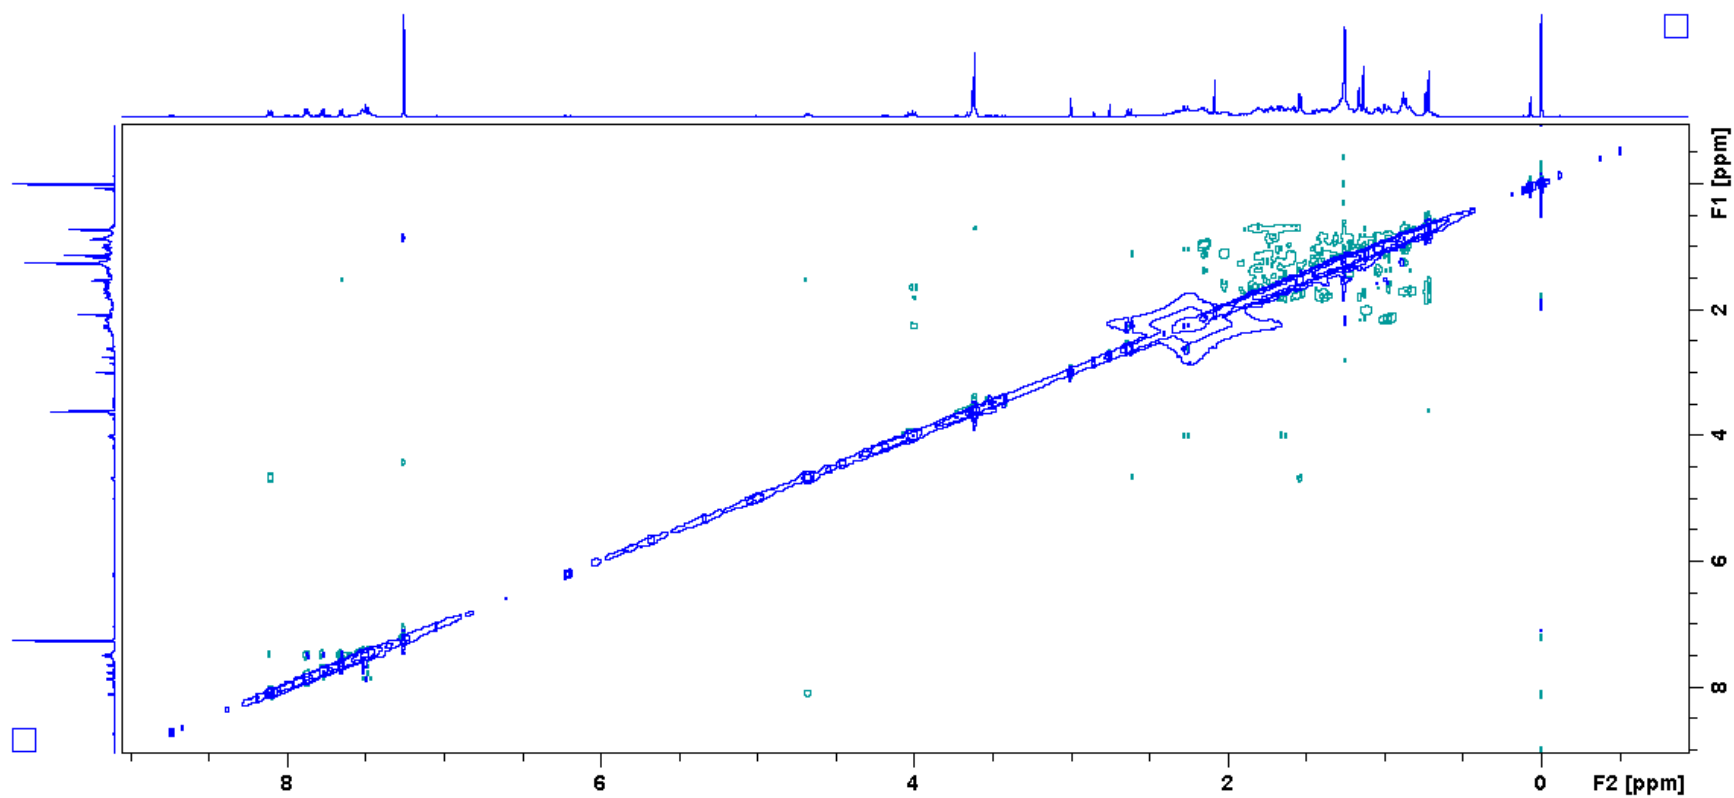

HSQC of compound (4*R*,4*aS*,6*aR*,8*R*,9*S*,11*aR*,11*bS*)-methyl 8-hydroxy-4,11*b*-dimethyl-9-((((*S*)-1-(naphthalen-1-yl)ethyl)amino)methyl)tetradecahydro-6*a*,9-methanocyclohepta[*a*]naphthalene-4-carboxylate (**27**)

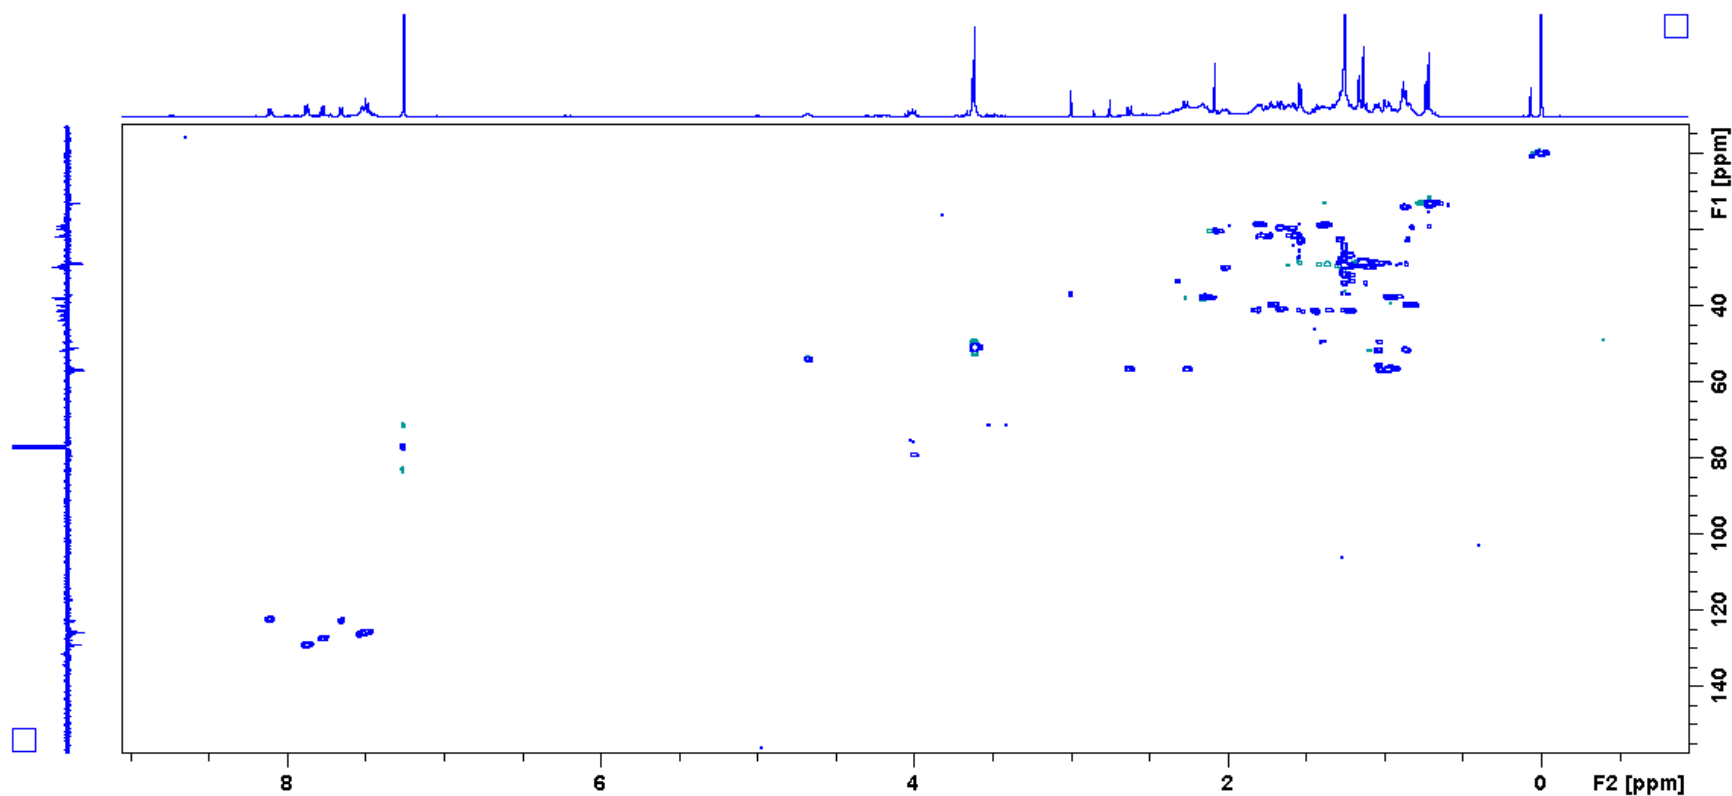

HMBC of compound (4*R*,4*aS*,6*aR*,8*R*,9*S*,11*aR*,11*bS*)-methyl 8-hydroxy-4,11*b*-dimethyl-9-(((*S*)-1-(naphthalen-1-yl)ethyl)amino)methyl)tetradecahydro-6*a*,9-methanocyclohepta[*a*]naphthalene-4-carboxylate (**27**)

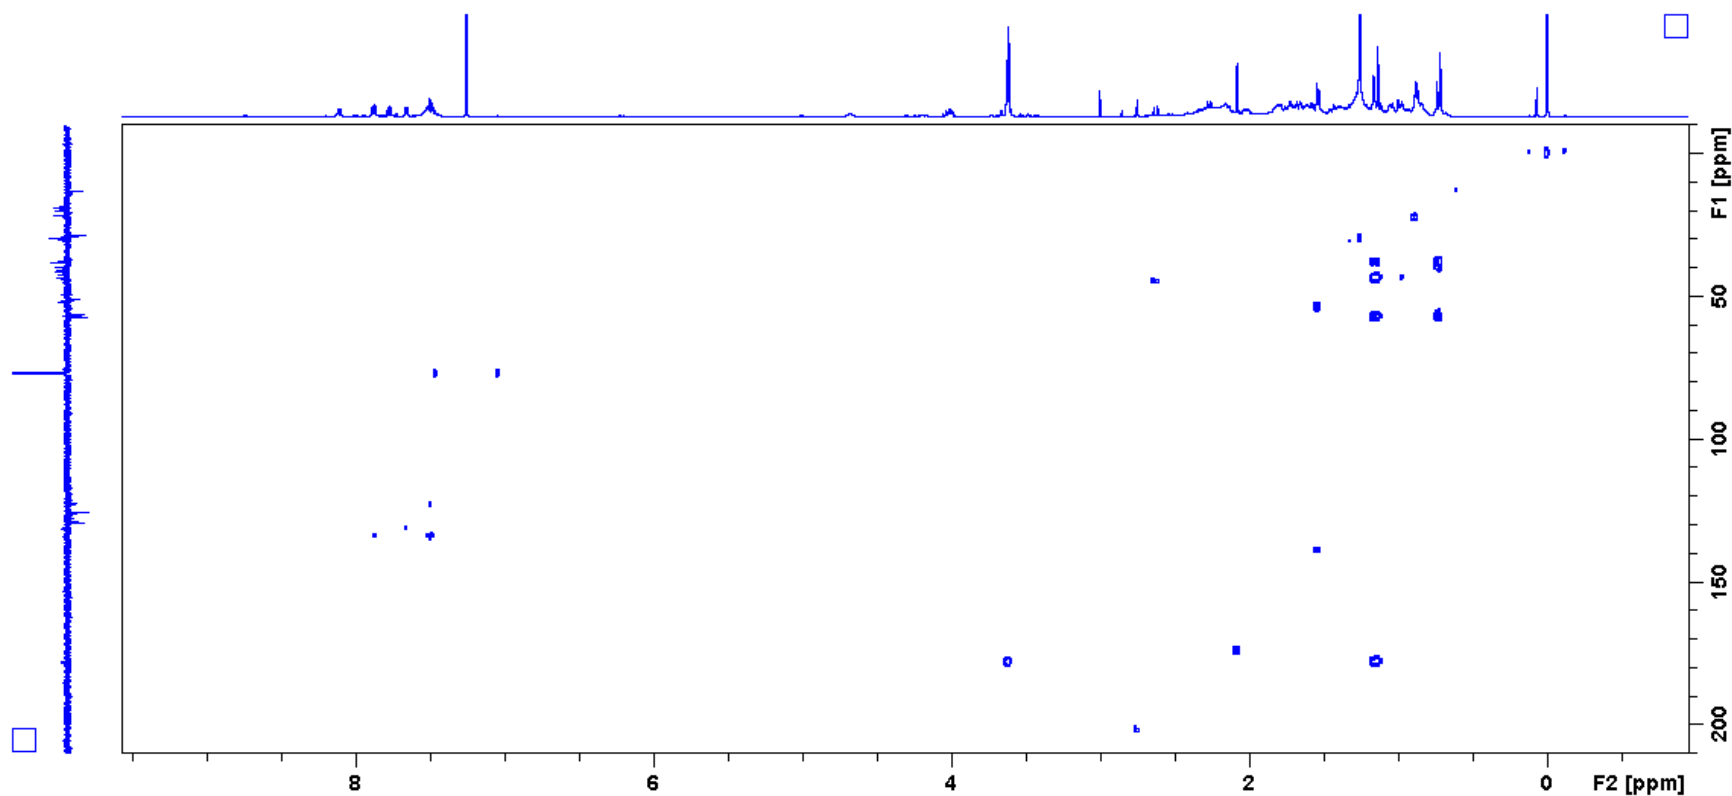

$^1\text{H}$ -NMR of compound (4*R*,4*aS*,6*aR*,8*R*,9*S*,11*aR*,11*bS*)-methyl 8-hydroxy-4,11*b*-dimethyl-9-((((*R*)-1-(naphthalen-1-yl)ethyl)amino)methyl)tetradecahydro-6*a*,9-methanocyclohepta[*a*]naphthalene-4-carboxylate (**28**)

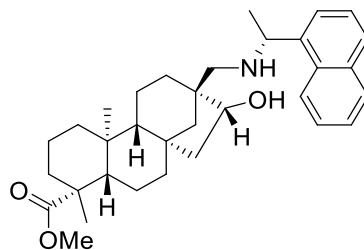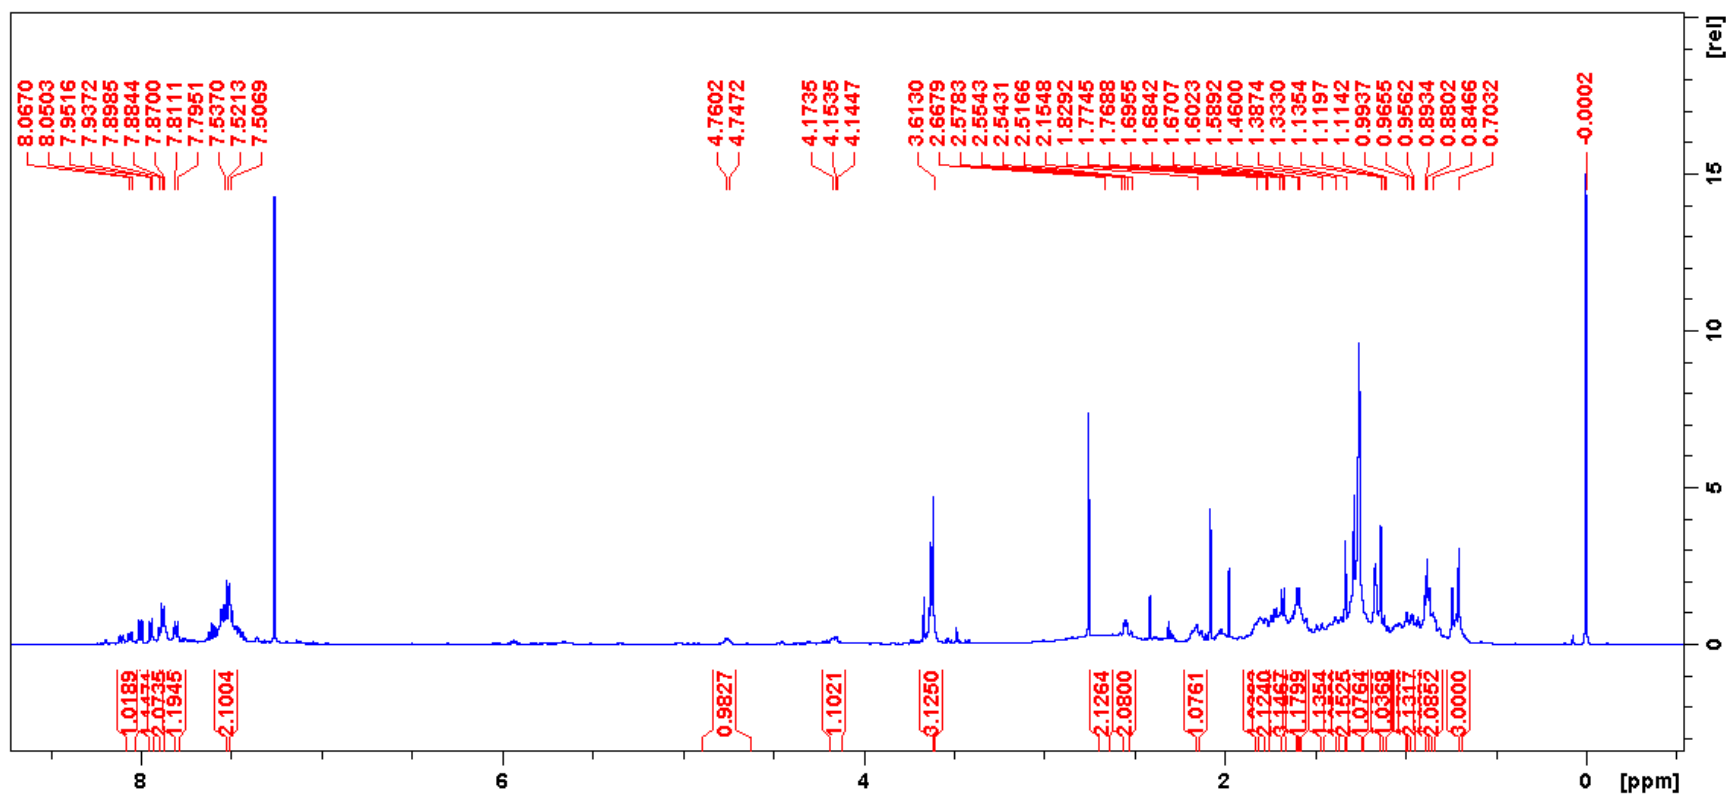

$^{13}\text{C}$ -NMR of compound (4*R*,4*aS*,6*aR*,8*R*,9*S*,11*aR*,11*bS*)-methyl 8-hydroxy-4,11b-dimethyl-9-((((*R*)-1-(naphthalen-1-yl)ethyl)amino)methyl)tetradecahydro-6*a*,9-methanocyclohepta[*a*]naphthalene-4-carboxylate (**28**)

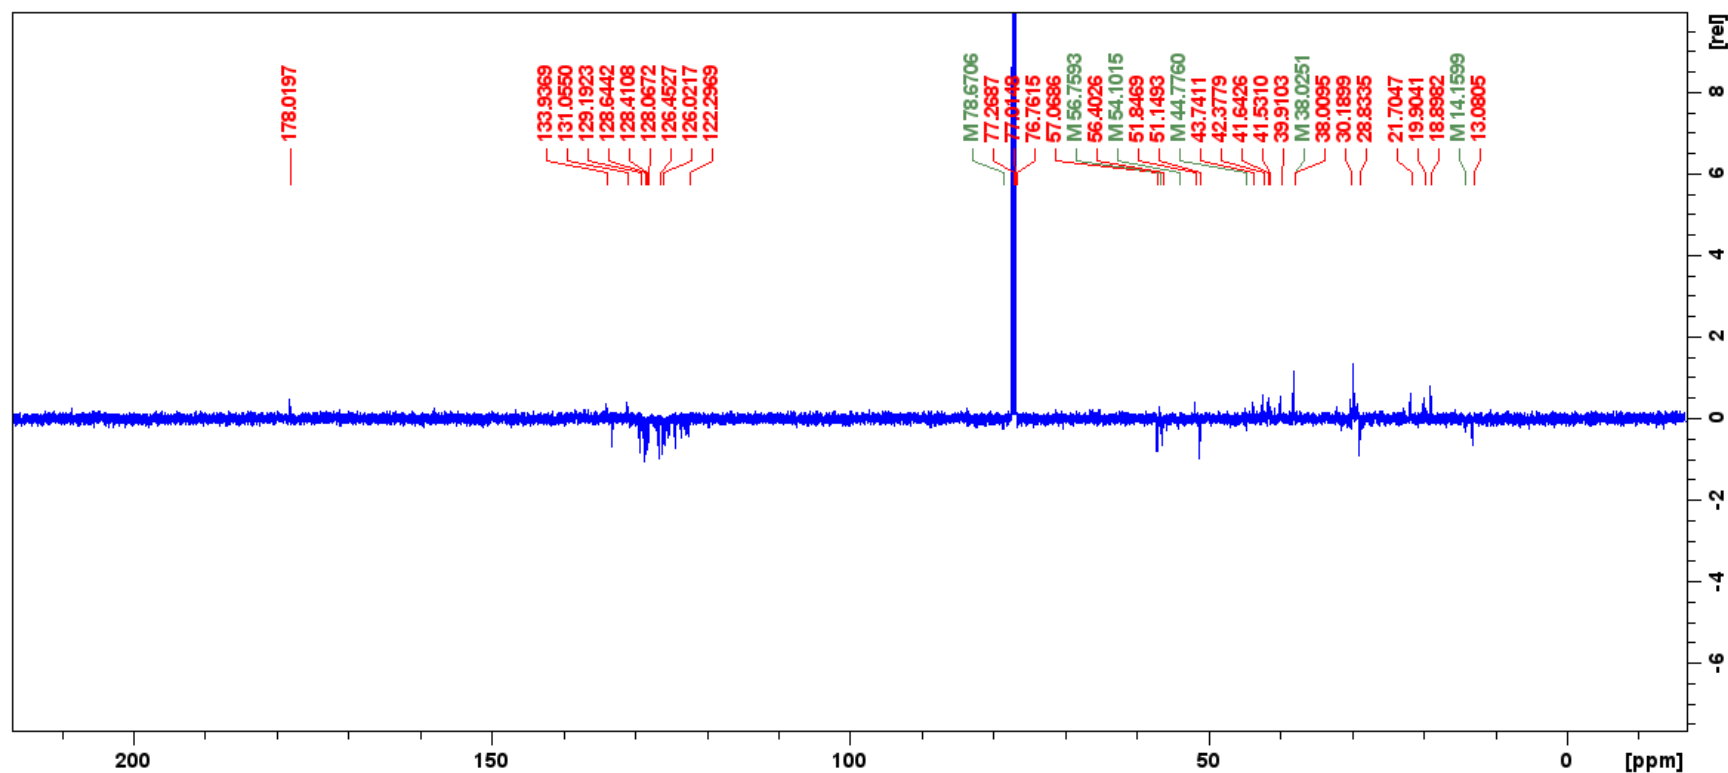

COSY of compound (4*R*,4*aS*,6*aR*,8*R*,9*S*,11*aR*,11*bS*)-methyl 8-hydroxy-4,11*b*-dimethyl-9-(((*R*)-1-(naphthalen-1-yl)ethyl)amino)methyl)tetradecahydro-6*a*,9-methanocyclohepta[*a*]naphthalene-4-carboxylate (**28**)

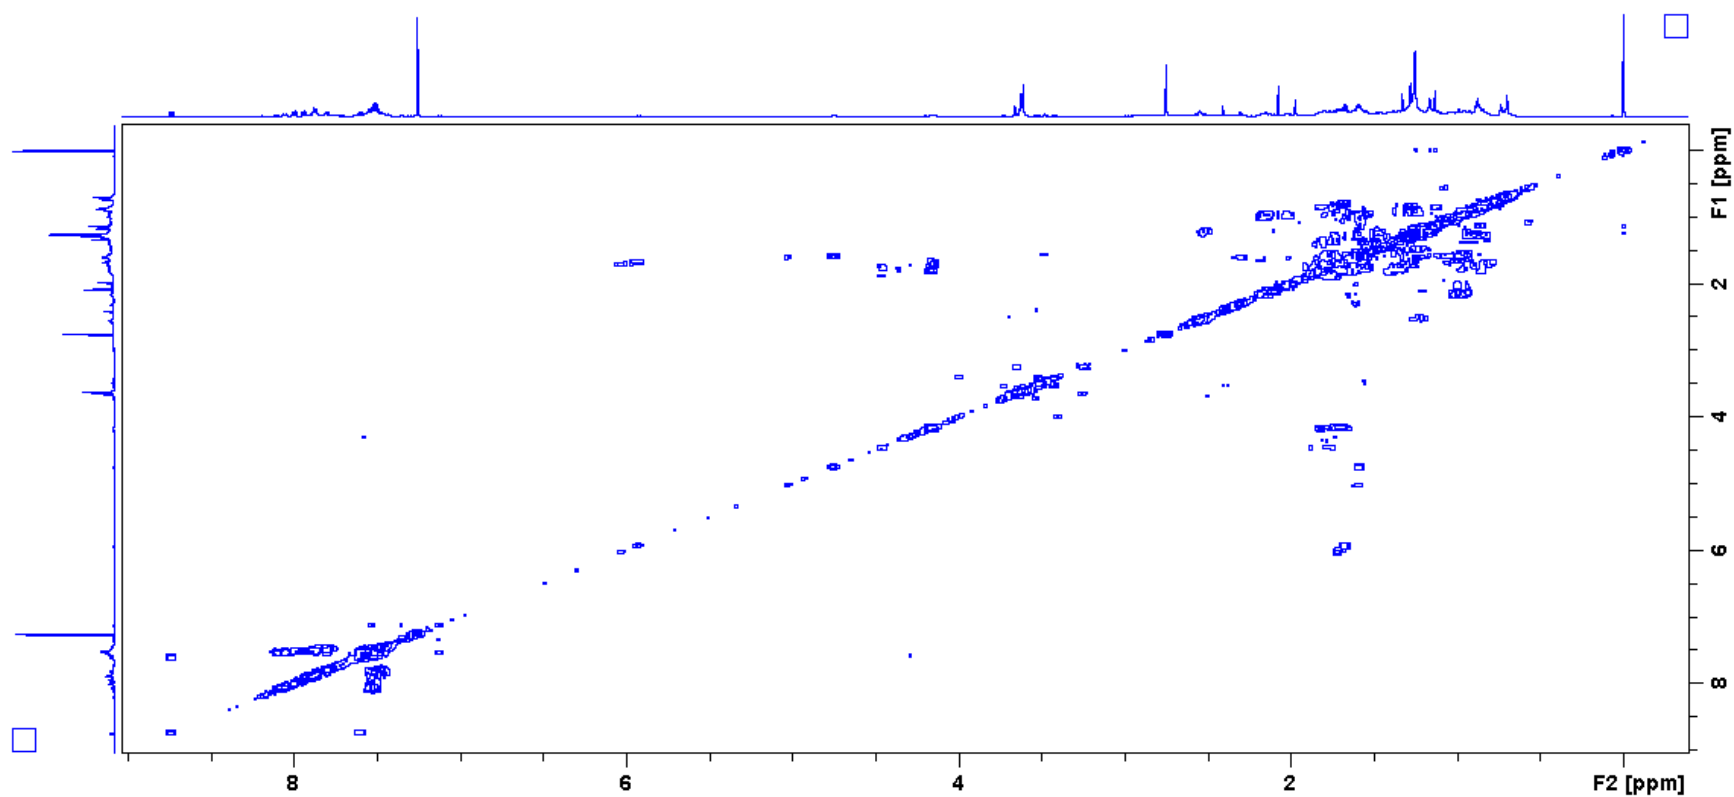

NOESY of compound (4*R*,4*aS*,6*aR*,8*R*,9*S*,11*aR*,11*bS*)-methyl 8-hydroxy-4,11*b*-dimethyl-9-(((*R*)-1-(naphthalen-1-yl)ethyl)amino)methyl)tetradecahydro-6*a*,9-methanocyclohepta[*a*]naphthalene-4-carboxylate (**28**)

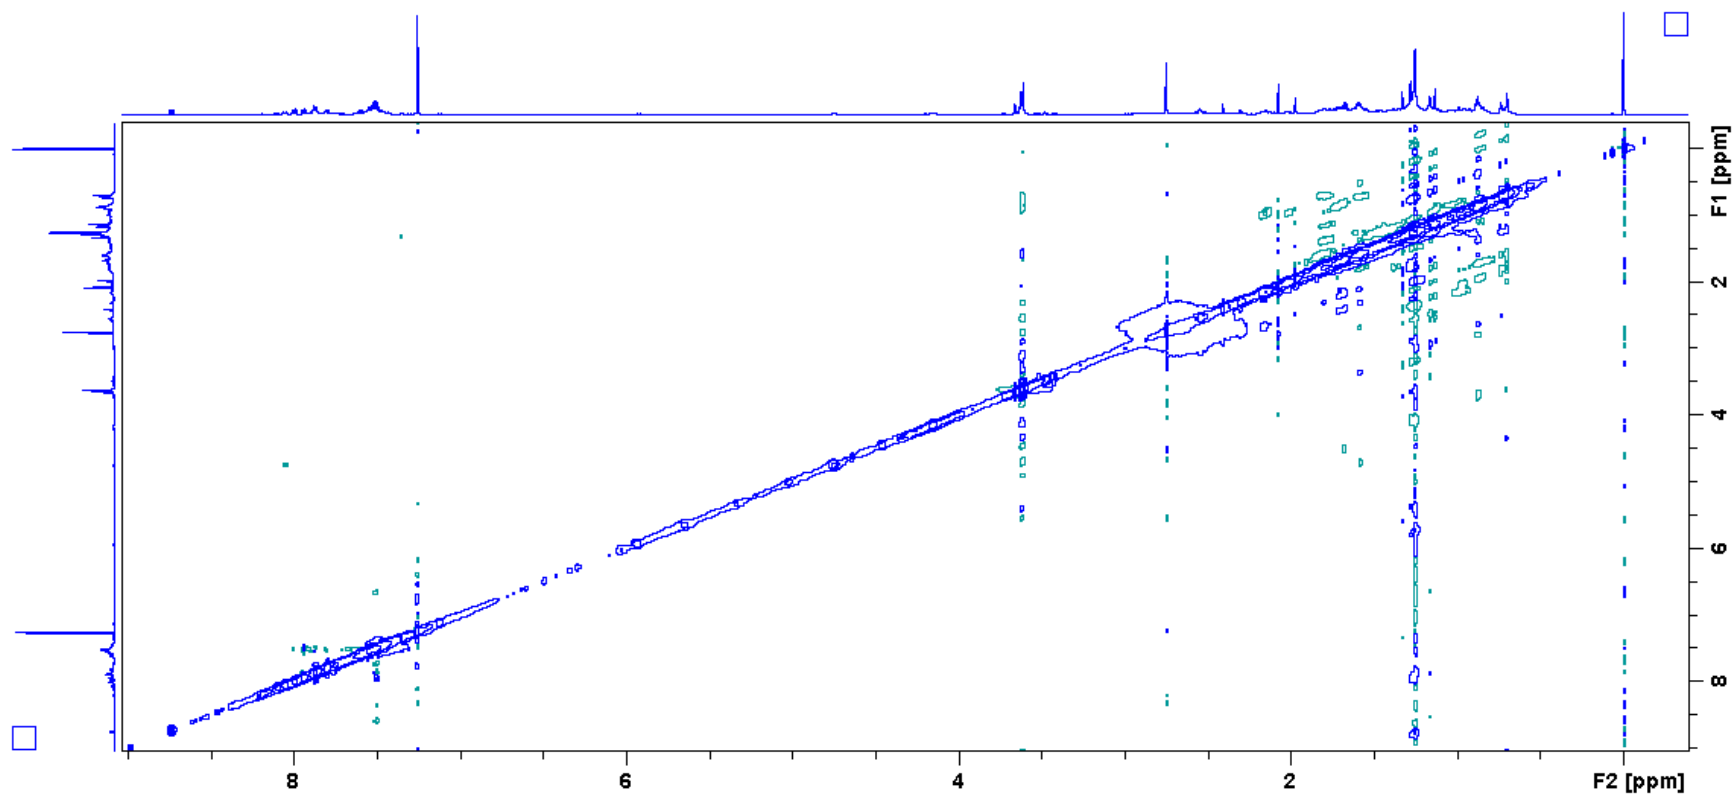

HSQC of compound (4*R*,4*aS*,6*aR*,8*R*,9*S*,11*aR*,11*bS*)-methyl 8-hydroxy-4,11*b*-dimethyl-9-((((*R*)-1-(naphthalen-1-yl)ethyl)amino)methyl)tetradecahydro-6*a*,9-methanocyclohepta[*a*]naphthalene-4-carboxylate (**28**)

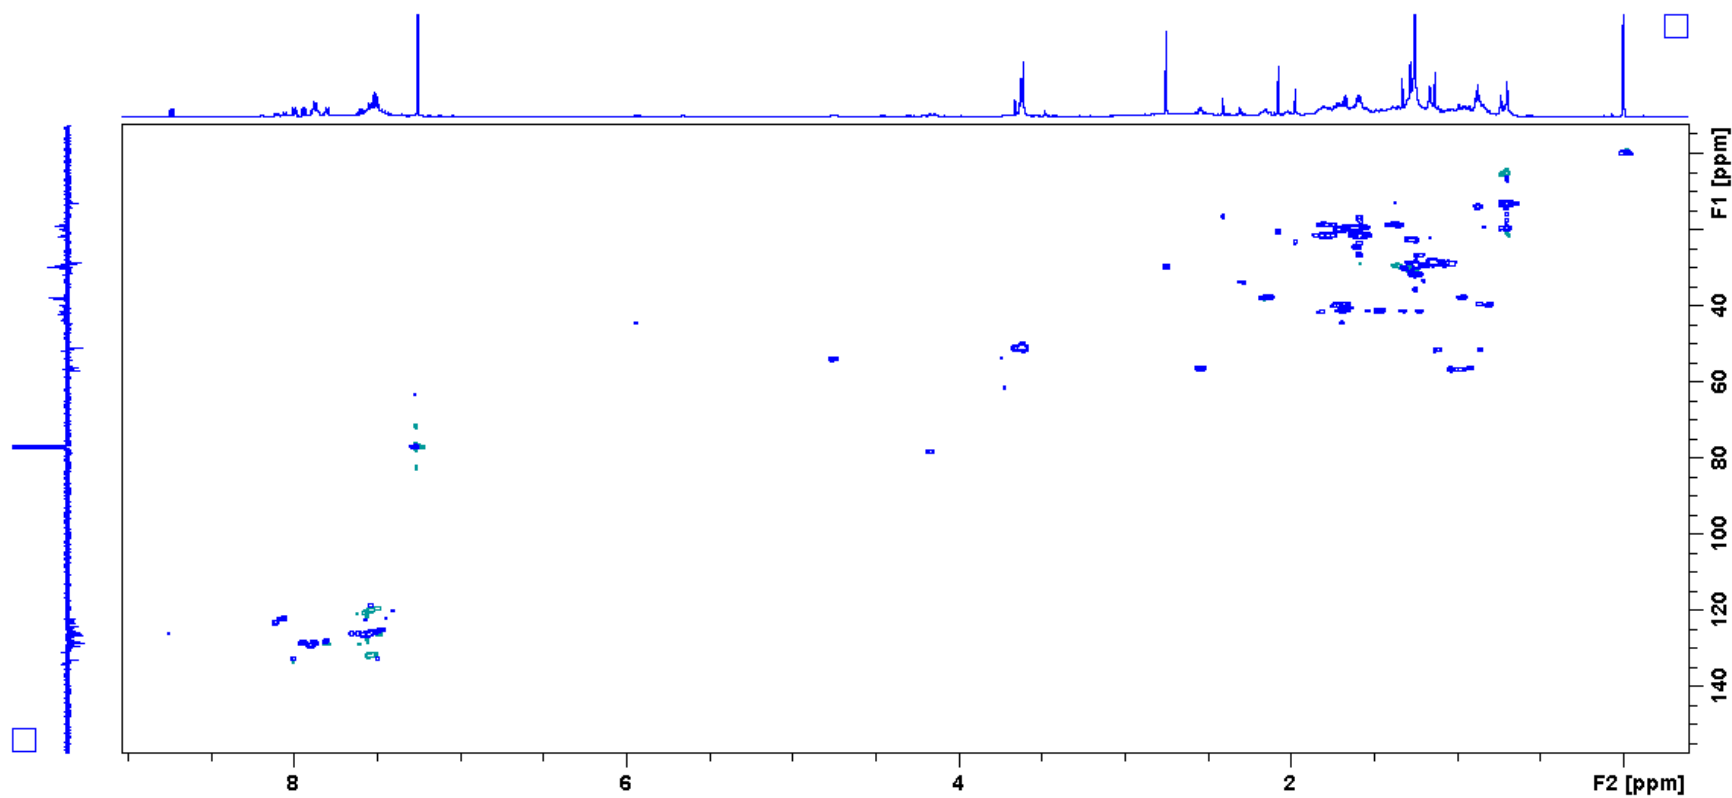



HMBC of compound (4*R*,4*aS*,6*aR*,8*R*,9*S*,11*aR*,11*bS*)-methyl 8-hydroxy-4,11*b*-dimethyl-9-((((*R*)-1-(naphthalen-1-yl)ethyl)amino)methyl)tetradecahydro-6*a*,9-methanocyclohepta[*a*]naphthalene-4-carboxylate (**28**)

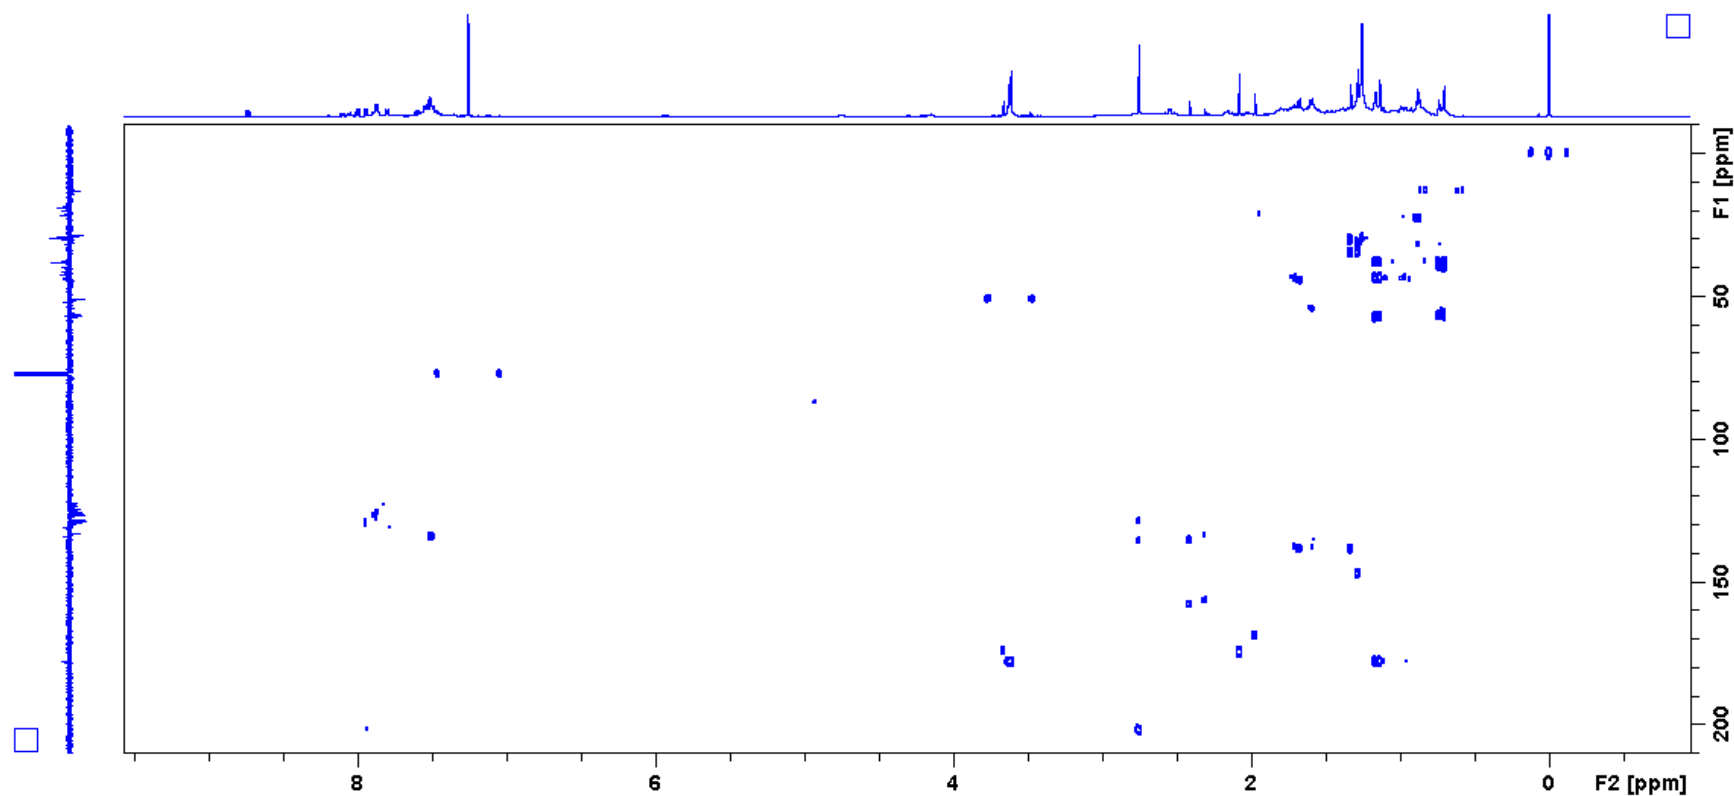

$^1\text{H}$ -NMR of compound (4*R*,4*aS*,6*aR*,8*R*,9*S*,11*aR*,11*bS*)-methyl 8-hydroxy-4,11*b*-dimethyl-9-((((*R*)-1-(naphthalen-2-yl)ethyl)amino)methyl)tetradecahydro-6*a*,9-methanocyclohepta[*a*]naphthalene-4-carboxylate (**29**)

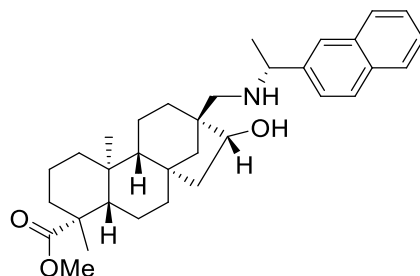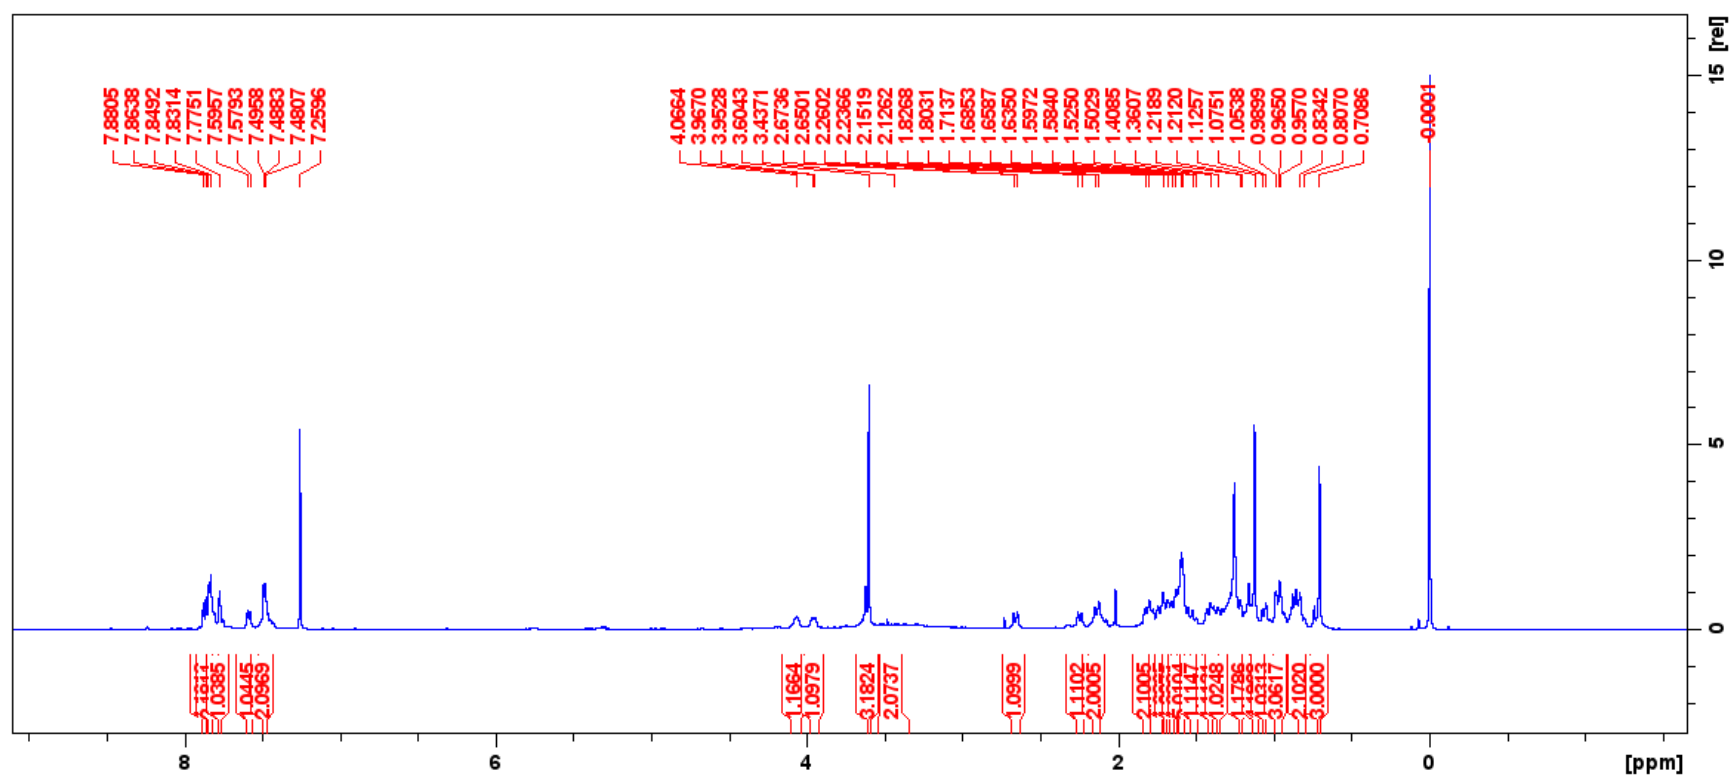

$^{13}\text{C}$ -NMR of compound (4*R*,4*aS*,6*aR*,8*R*,9*S*,11*aR*,11*bS*)-methyl 8-hydroxy-4,11*b*-dimethyl-9-((((*R*)-1-(naphthalen-2-yl)ethyl)amino)methyl)tetradecahydro-6*a*,9-methanocyclohepta[*a*]naphthalene-4-carboxylate (**29**)

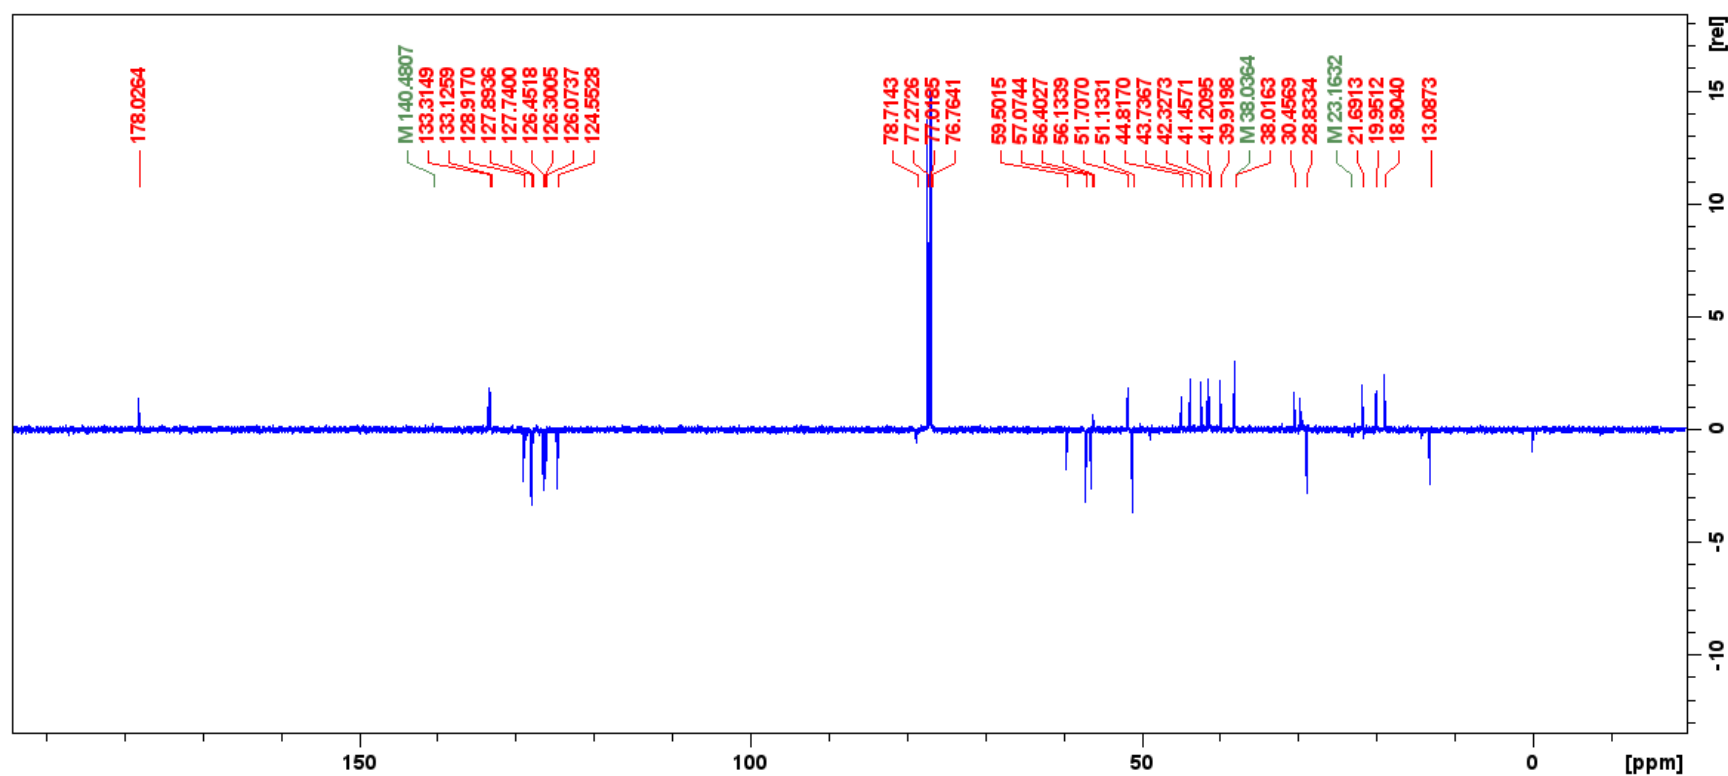

COSY of compound (4*R*,4*aS*,6*aR*,8*R*,9*S*,11*aR*,11*bS*)-methyl 8-hydroxy-4,11*b*-dimethyl-9-((((*R*)-1-(naphthalen-2-yl)ethyl)amino)methyl)tetradecahydro-6*a*,9-methanocyclohepta[*a*]naphthalene-4-carboxylate (**29**)

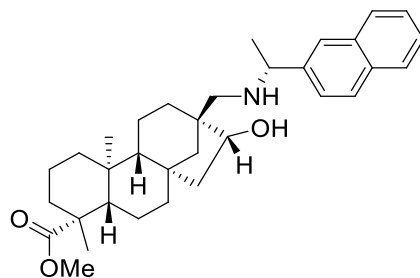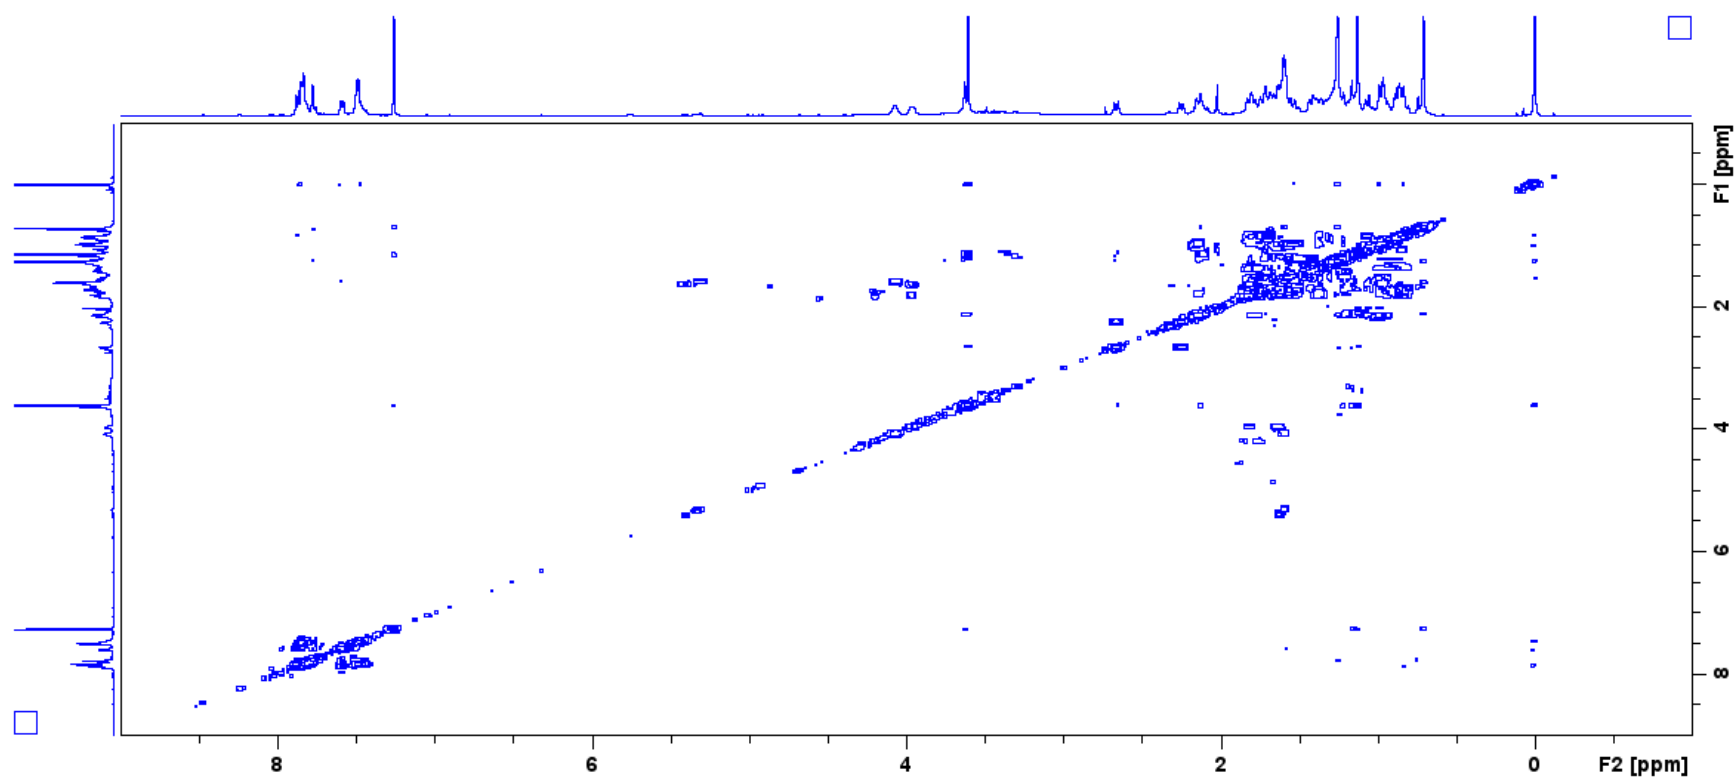

NOESY of compound (4*R*,4*aS*,6*aR*,8*R*,9*S*,11*aR*,11*bS*)-methyl 8-hydroxy-4,11*b*-dimethyl-9-((((*R*)-1-(naphthalen-2-yl)ethyl)amino)methyl)tetradecahydro-6*a*,9-methanocyclohepta[*a*]naphthalene-4-carboxylate (**29**)

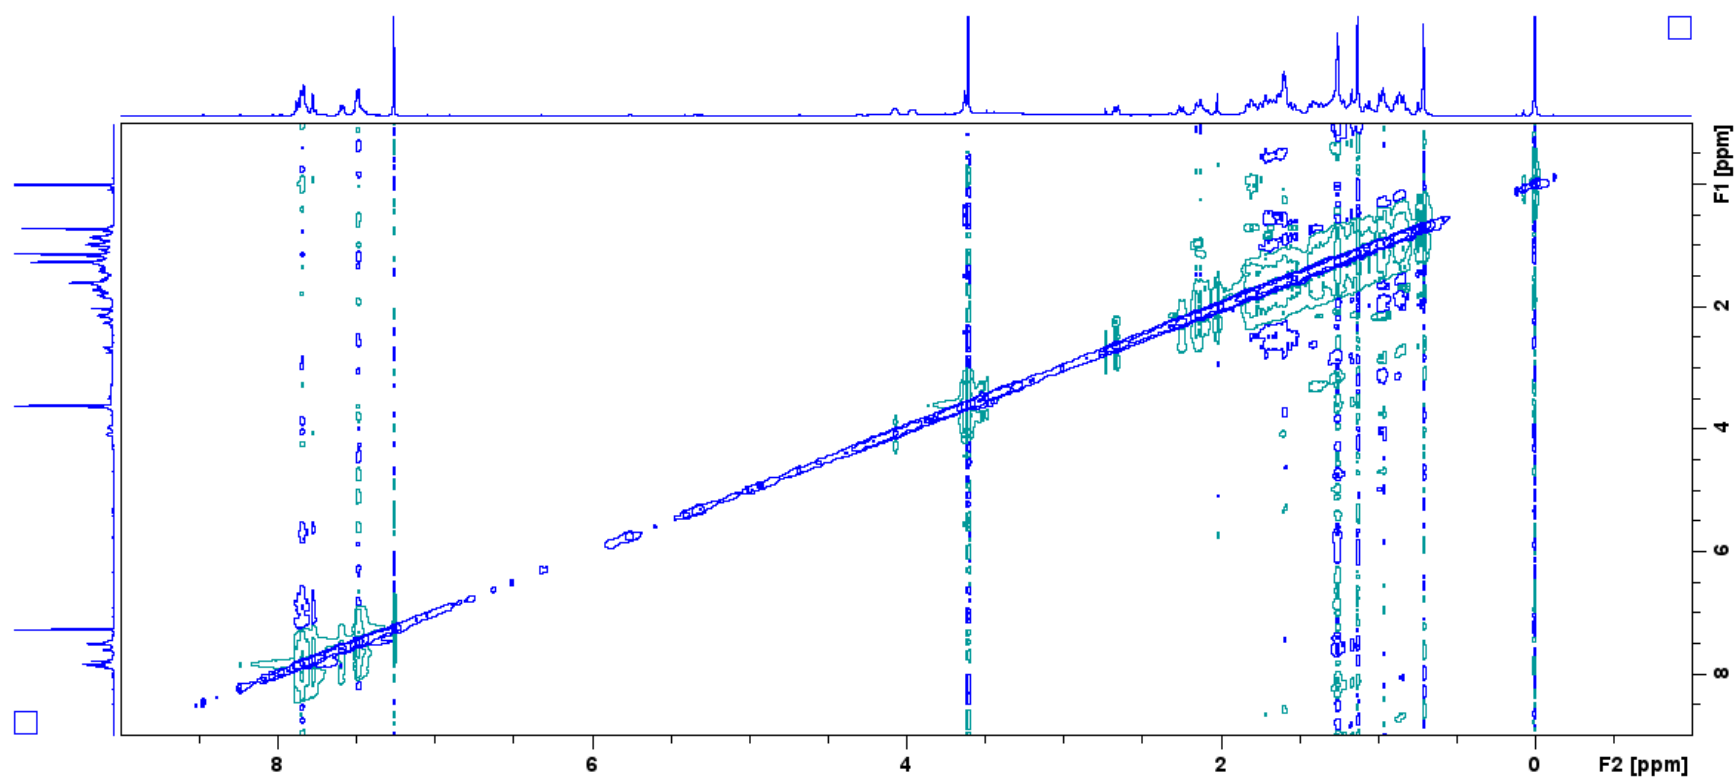

HSQC of compound (4*R*,4*aS*,6*aR*,8*R*,9*S*,11*aR*,11*bS*)-methyl 8-hydroxy-4,11*b*-dimethyl-9-((((*R*)-1-(naphthalen-2-yl)ethyl)amino)methyl)tetradecahydro-6*a*,9-methanocyclohepta[*a*]naphthalene-4-carboxylate (**29**)

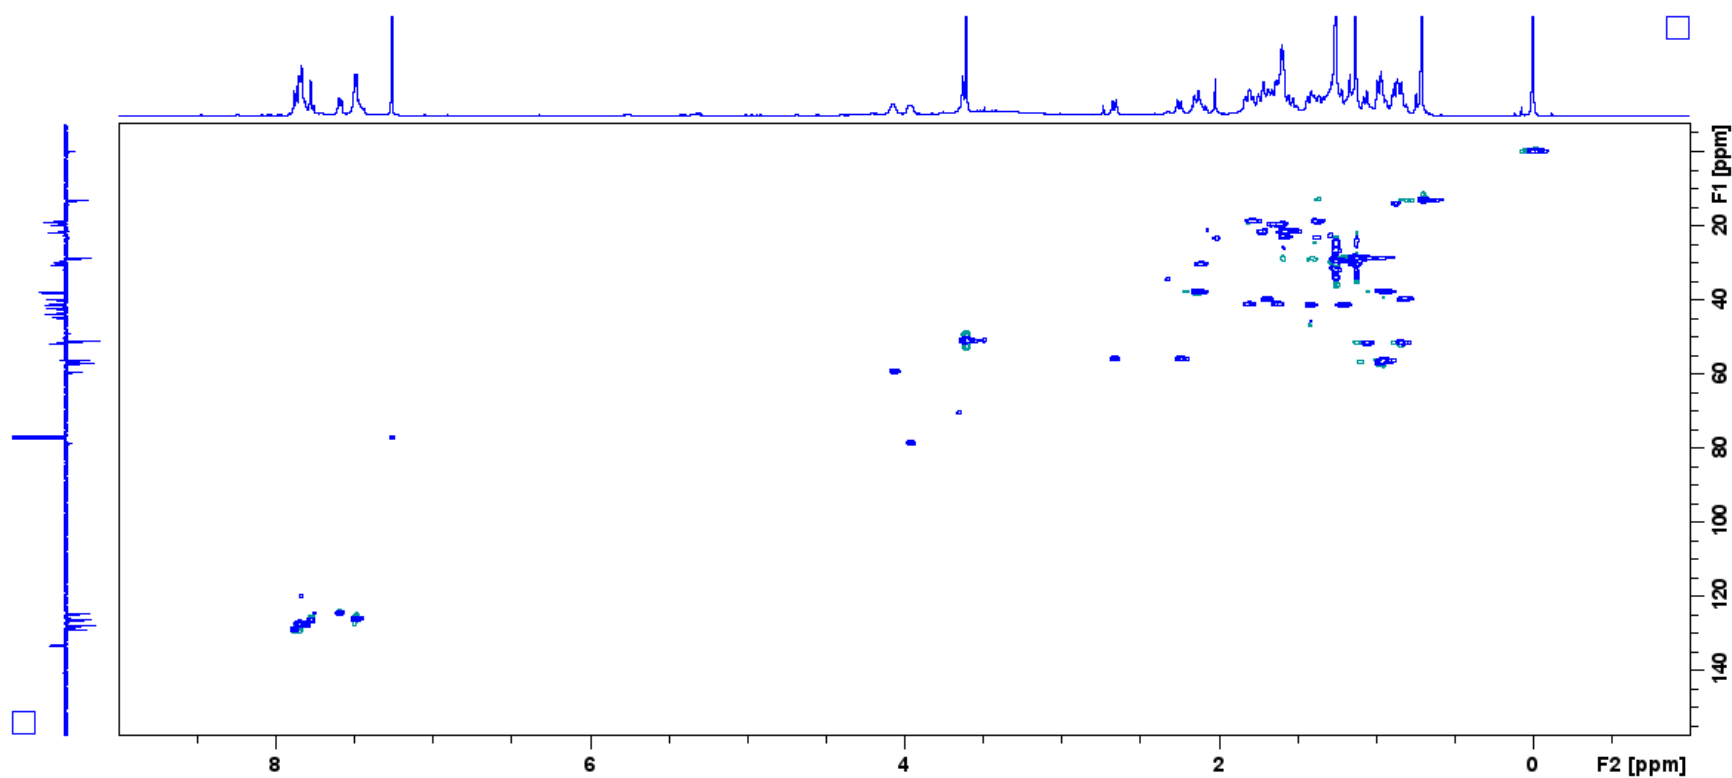

HMBC of compound (4*R*,4*aS*,6*aR*,8*R*,9*S*,11*aR*,11*bS*)-methyl 8-hydroxy-4,11*b*-dimethyl-9-((((*R*)-1-(naphthalen-2-yl)ethyl)amino)methyl)tetradecahydro-6*a*,9-methanocyclohepta[*a*]naphthalene-4-carboxylate (**29**)

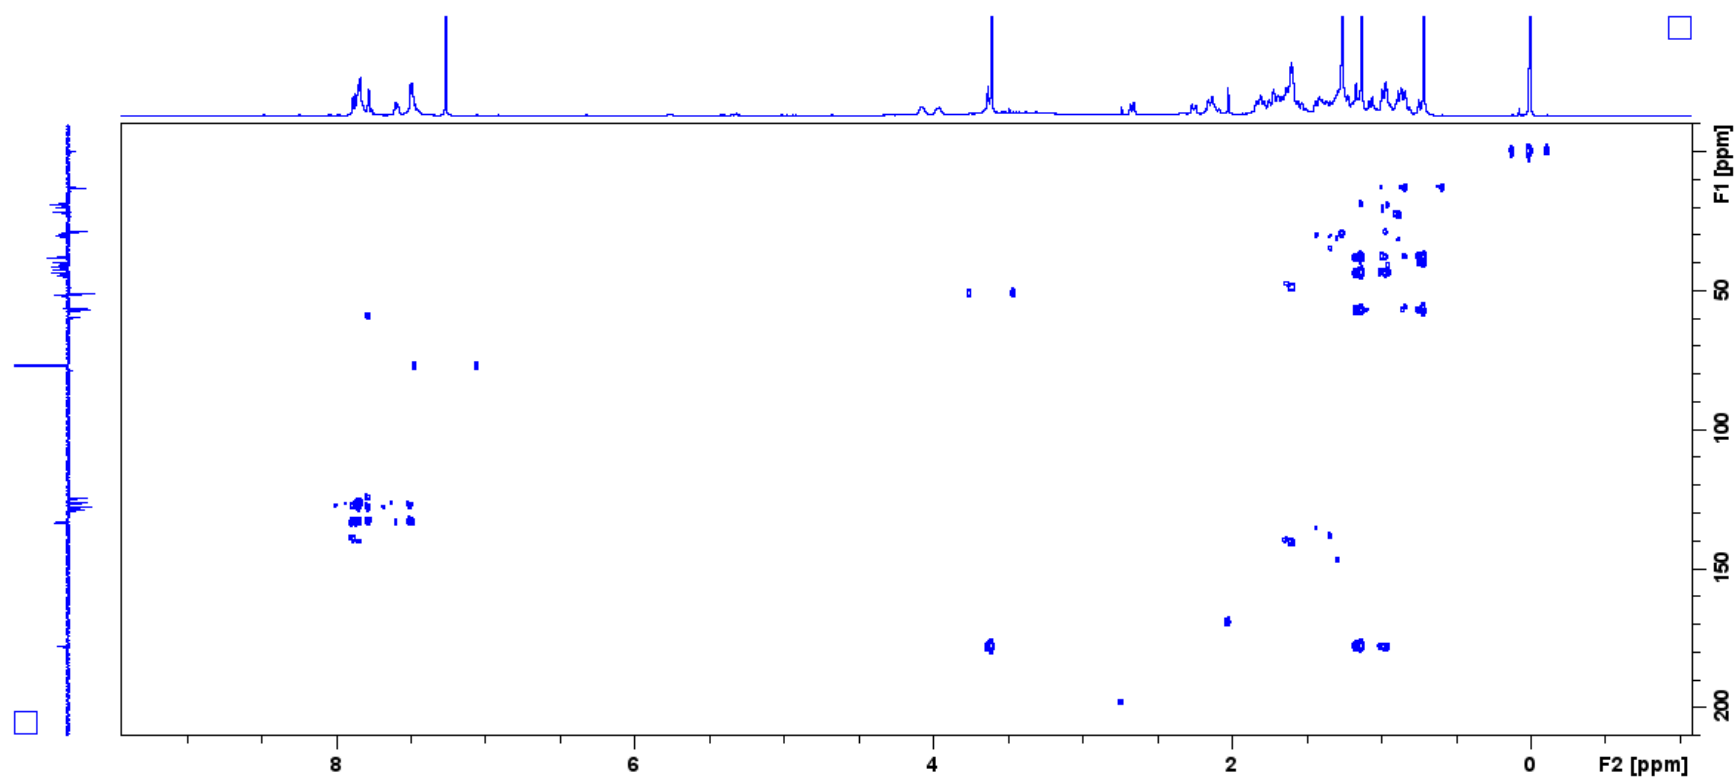

$^1\text{H}$ -NMR of compound (4*R*,4*aS*,6*aR*,8*R*,9*S*,11*aR*,11*bS*)-methyl 8-hydroxy-4,11*b*-dimethyl-9-((((*S*)-1-(naphthalen-2-yl)ethyl)amino)methyl)tetradecahydro-6*a*,9-methanocyclohepta[*a*]naphthalene-4-carboxylate (**30**)

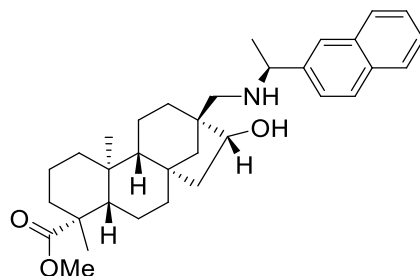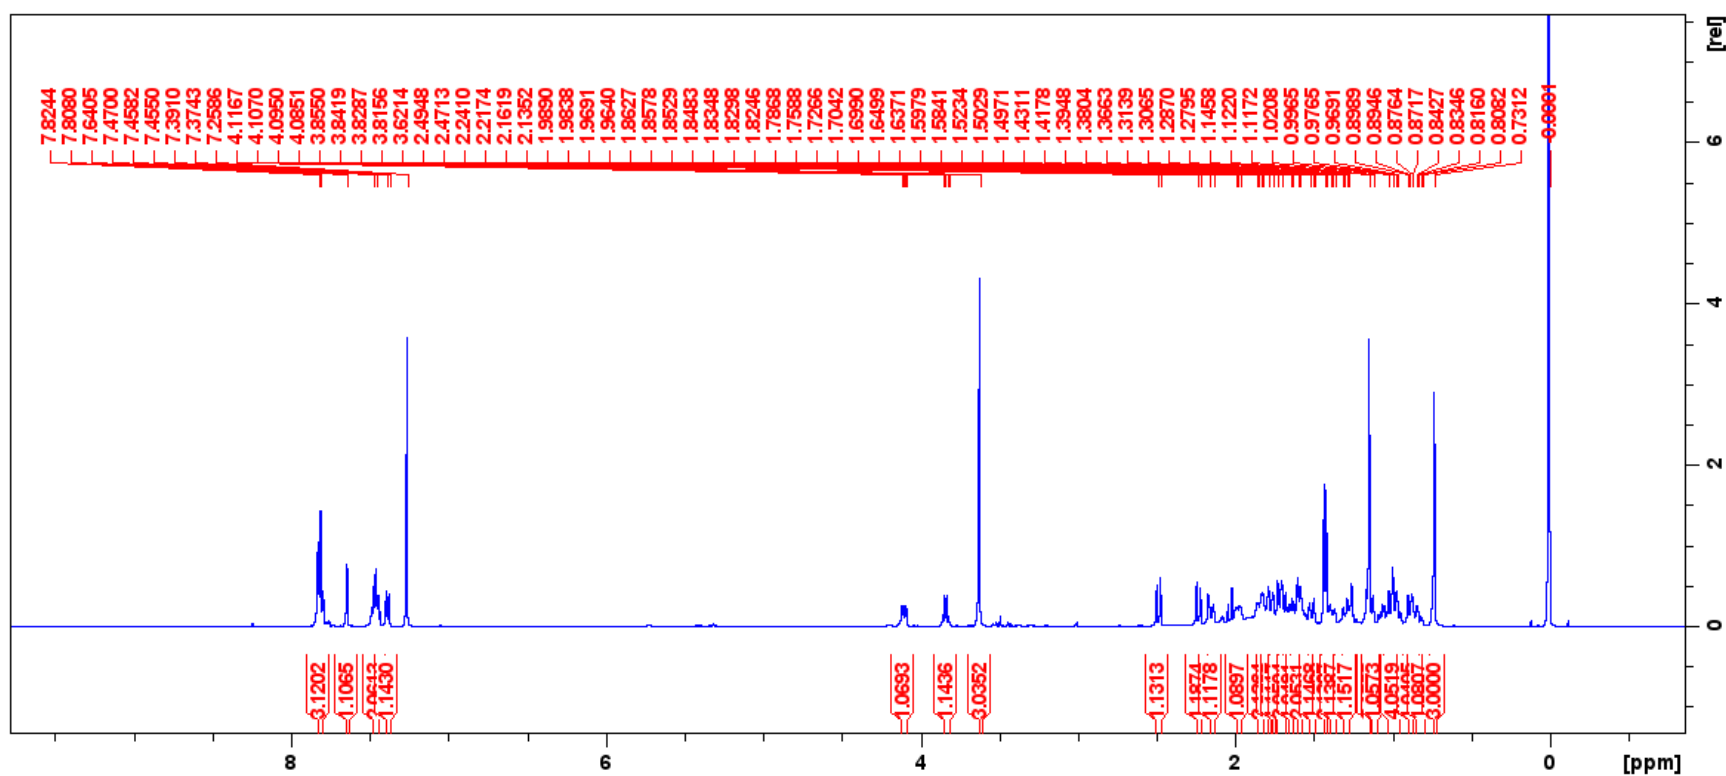



$^{13}\text{C}$ -NMR of compound (4*R*,4*aS*,6*aR*,8*R*,9*S*,11*aR*,11*bS*)-methyl 8-hydroxy-4,11*b*-dimethyl-9-((((*S*)-1-(naphthalen-2-yl)ethyl)amino)methyl)tetradecahydro-6*a*,9-methanocyclohepta[*a*]naphthalene-4-carboxylate (**30**)

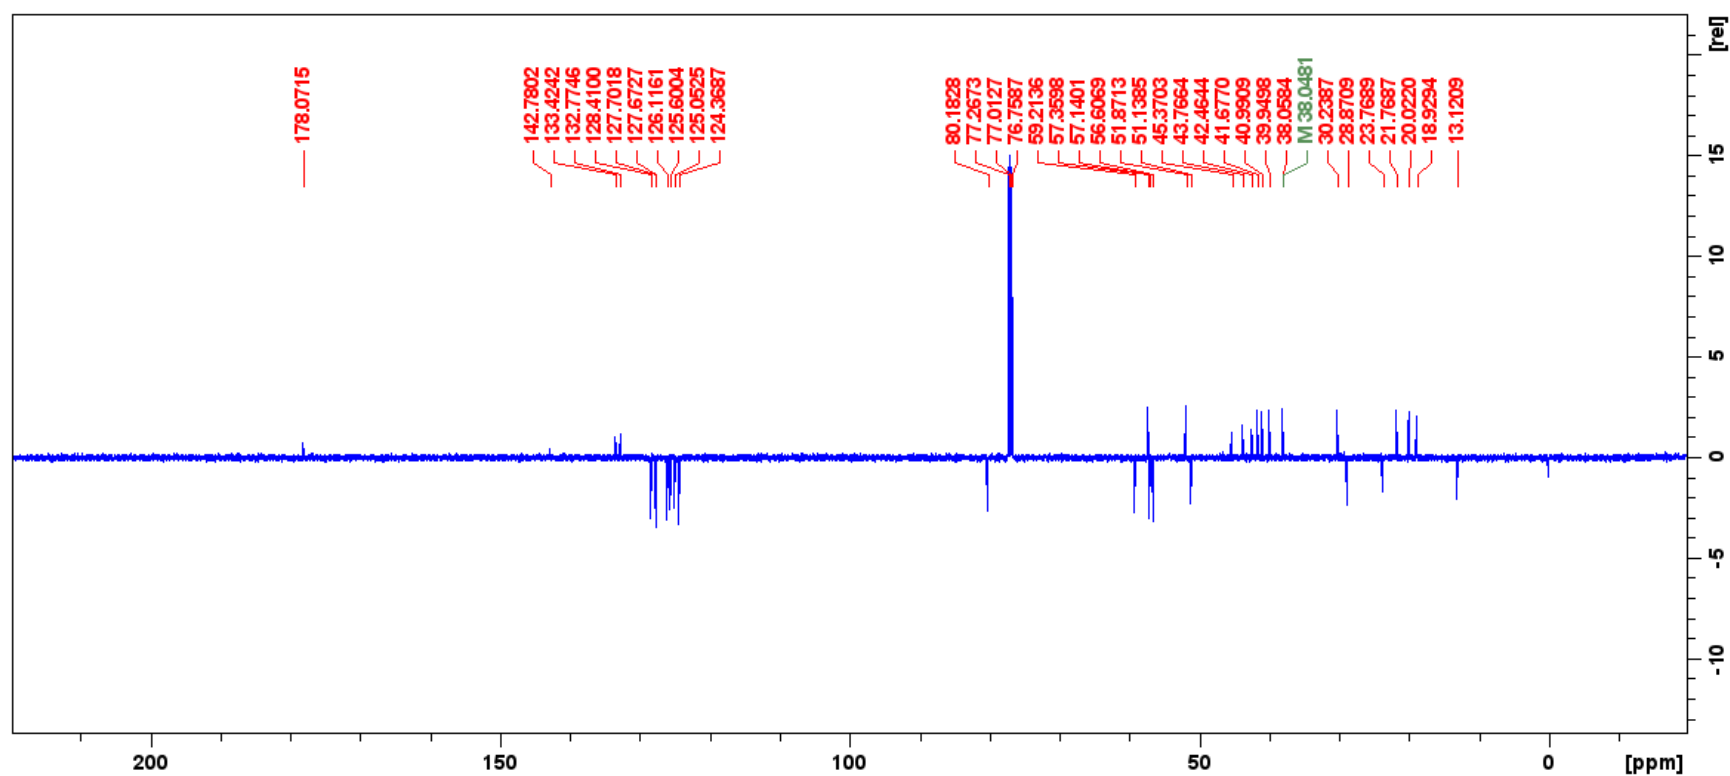

COSY of compound (4*R*,4*aS*,6*aR*,8*R*,9*S*,11*aR*,11*bS*)-methyl 8-hydroxy-4,11*b*-dimethyl-9-((((*S*)-1-(naphthalen-2-yl)ethyl)amino)methyl)tetradecahydro-6*a*,9-methanocyclohepta[*a*]naphthalene-4-carboxylate (**30**)

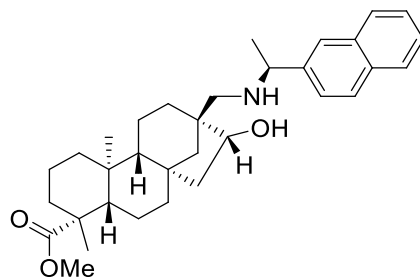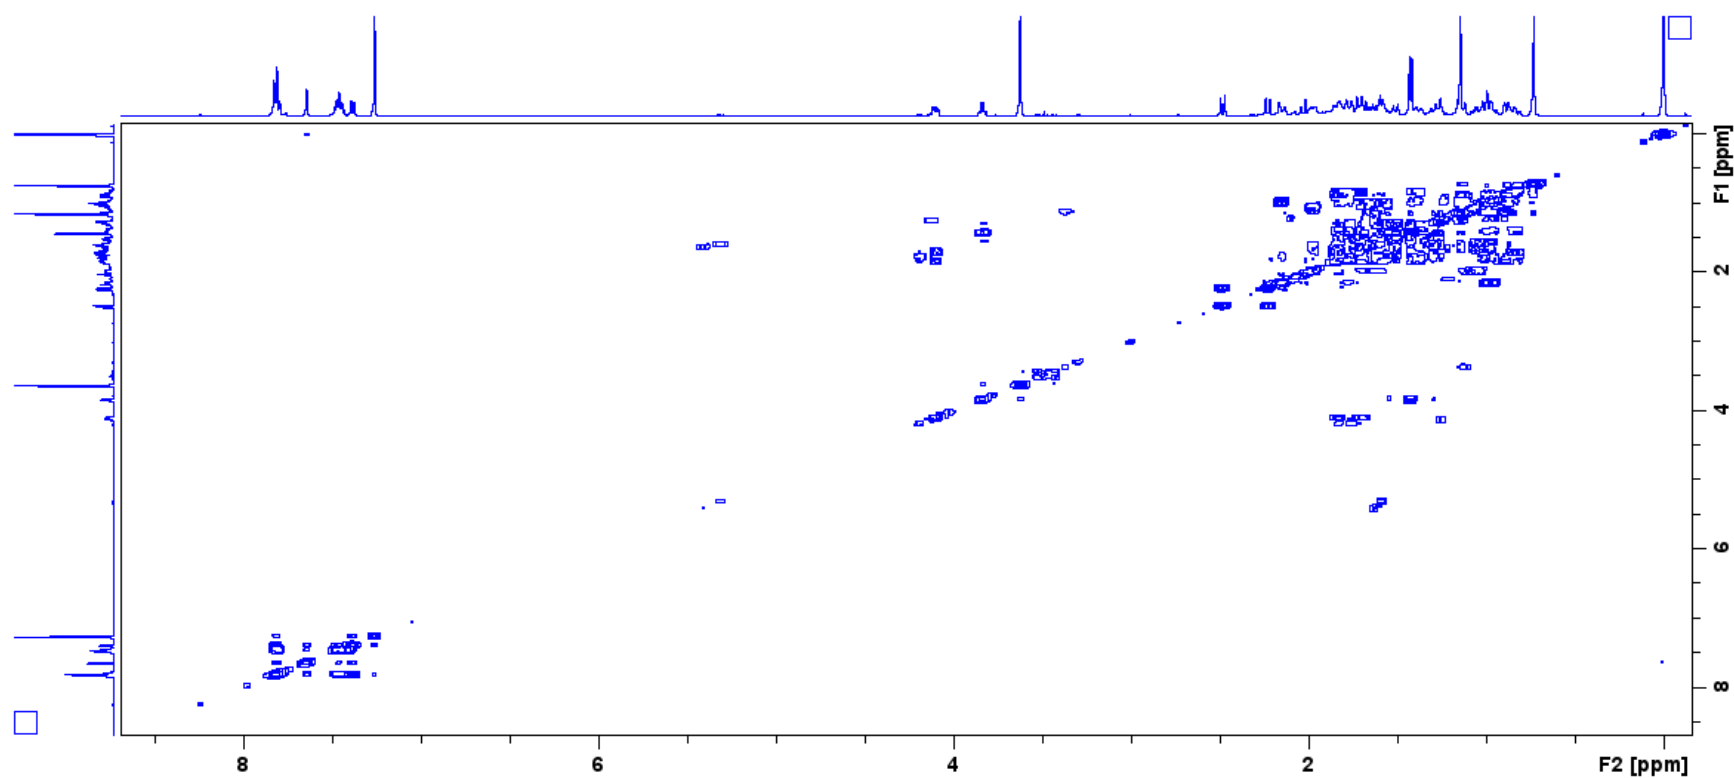

NOESY of compound (4*R*,4*aS*,6*aR*,8*R*,9*S*,11*aR*,11*bS*)-methyl 8-hydroxy-4,11*b*-dimethyl-9-((((*S*)-1-(naphthalen-2-yl)ethyl)amino)methyl)tetradecahydro-6*a*,9-methanocyclohepta[*a*]naphthalene-4-carboxylate (**30**)

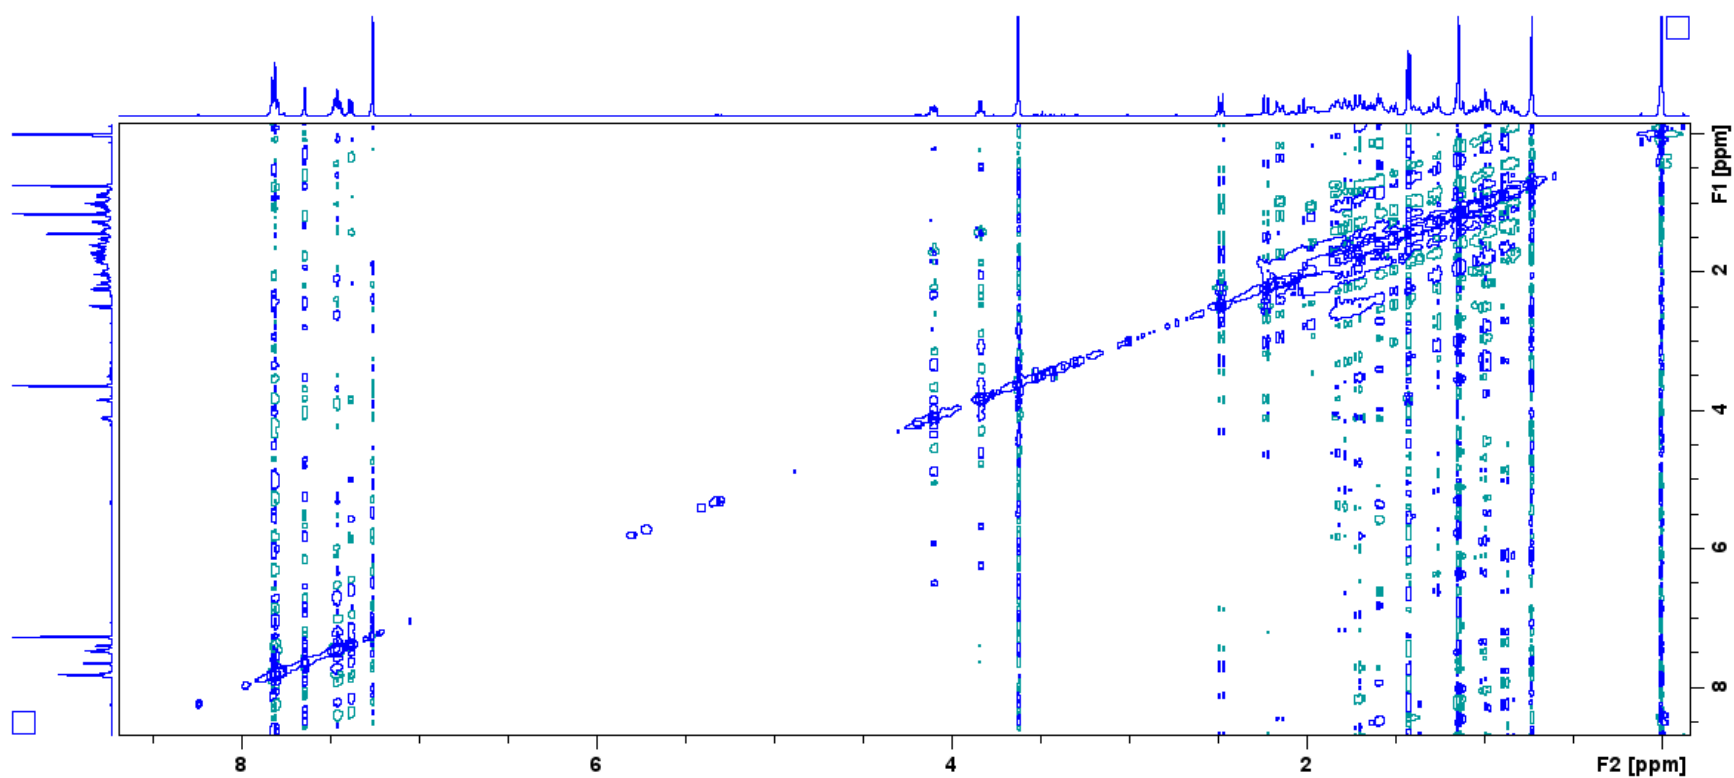

HSQC of compound (4*R*,4*aS*,6*aR*,8*R*,9*S*,11*aR*,11*bS*)-methyl 8-hydroxy-4,11*b*-dimethyl-9-((((*S*)-1-(naphthalen-2-yl)ethyl)amino)methyl)tetradecahydro-6*a*,9-methanocyclohepta[*a*]naphthalene-4-carboxylate (**30**)

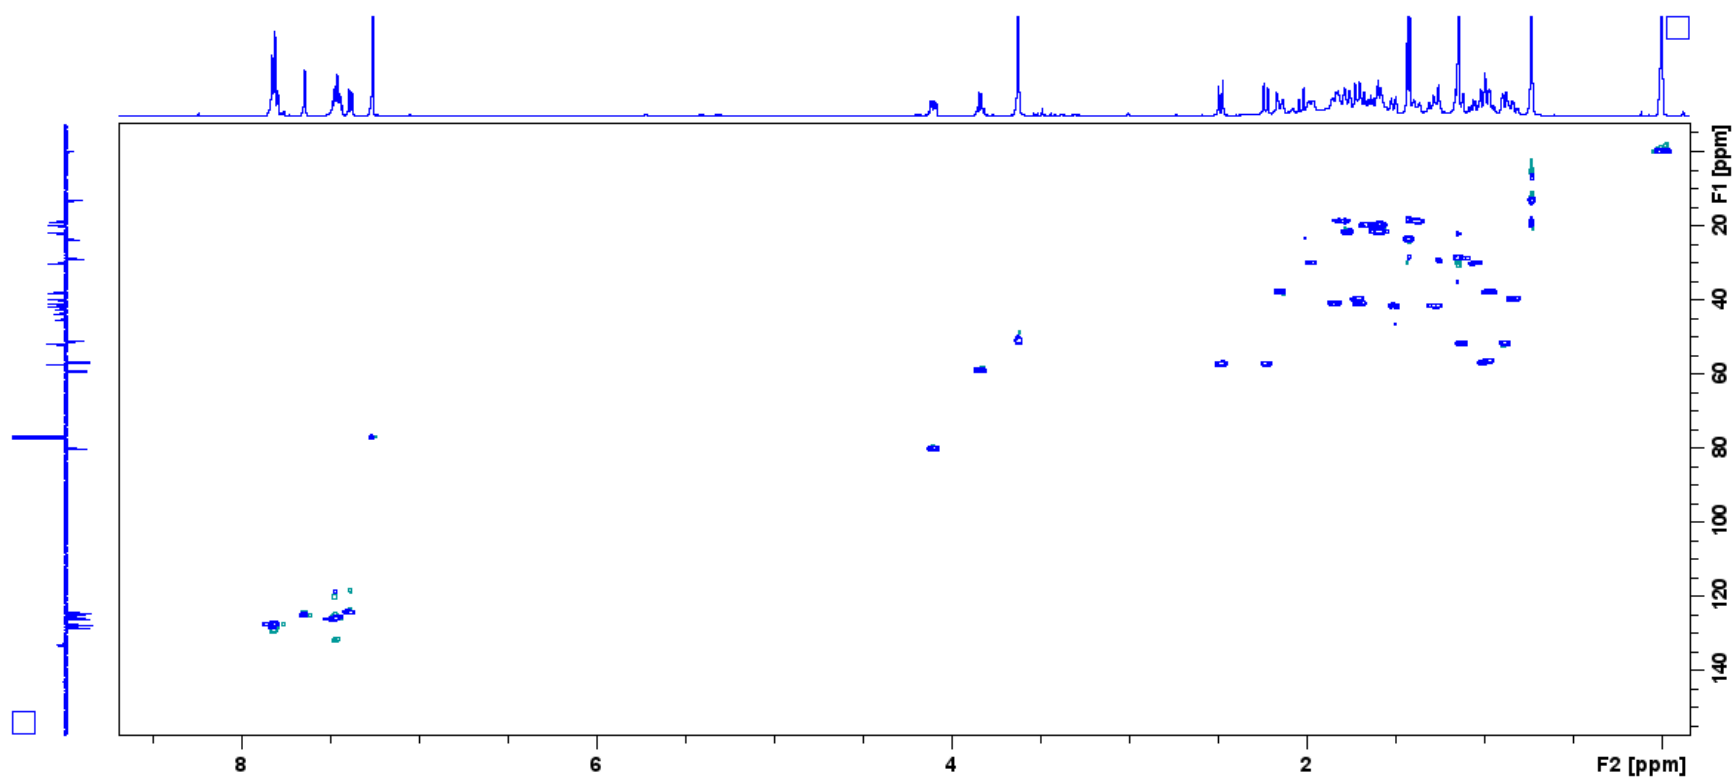

HMBC of compound (4*R*,4*aS*,6*aR*,8*R*,9*S*,11*aR*,11*bS*)-methyl 8-hydroxy-4,11*b*-dimethyl-9-(((*S*)-1-(naphthalen-2-yl)ethyl)amino)methyl)tetradecahydro-6*a*,9-methanocyclohepta[*a*]naphthalene-4-carboxylate (**30**)

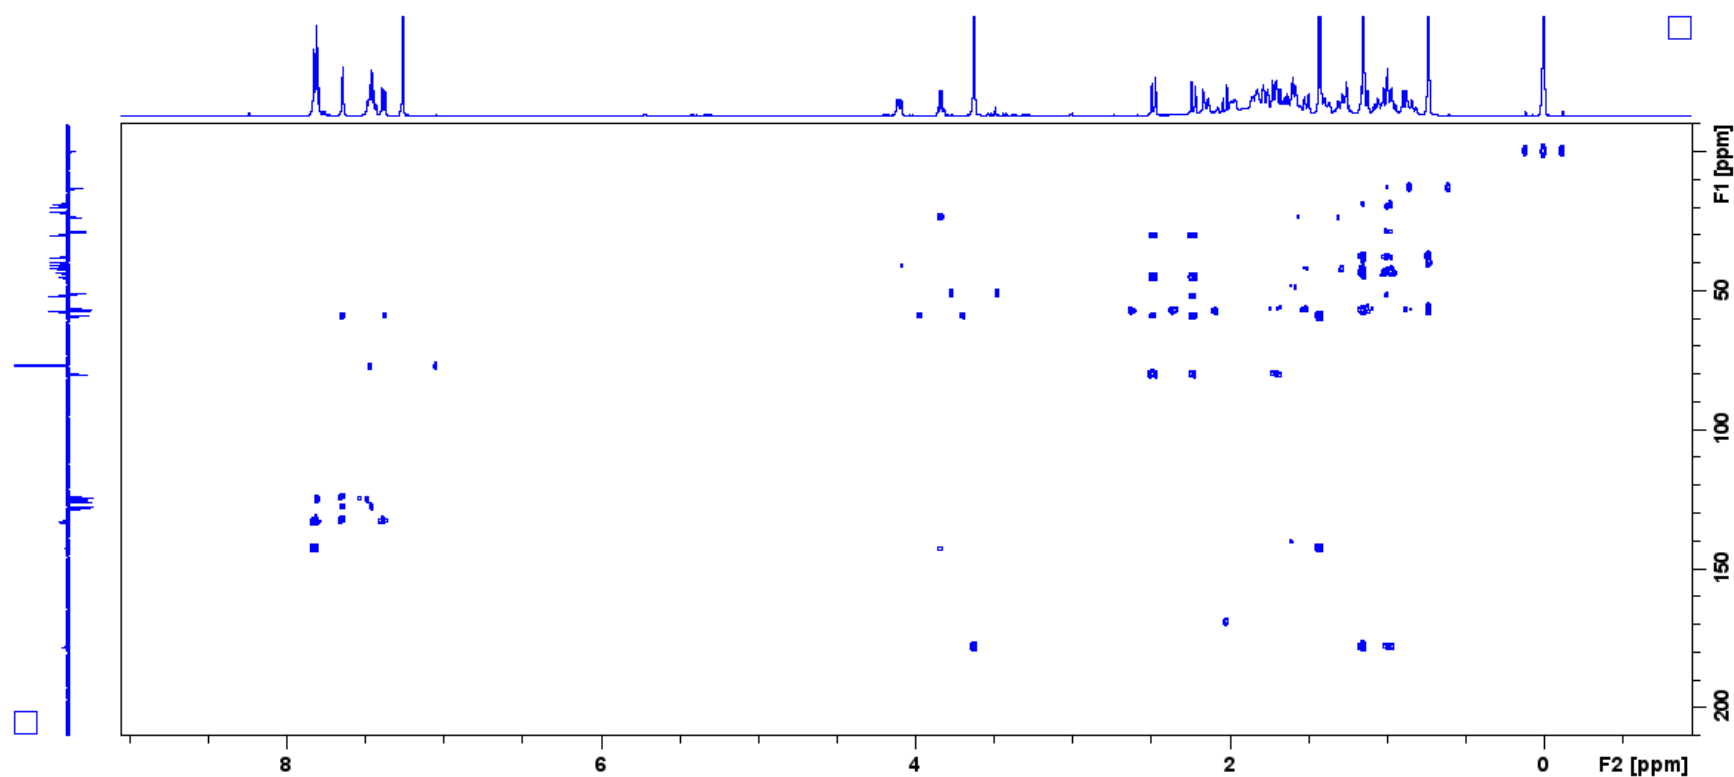

$^1\text{H}$ -NMR of compound (4*R*,4*aS*,6*aR*,8*R*,9*S*,11*aR*,11*bS*)-methyl 9-(aminomethyl)-8-hydroxy-4,11*b*-dimethyltetradecahydro-6*a*,9-methanocyclohepta[*a*]naphthalene-4-carboxylate (**31**)

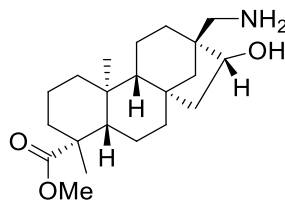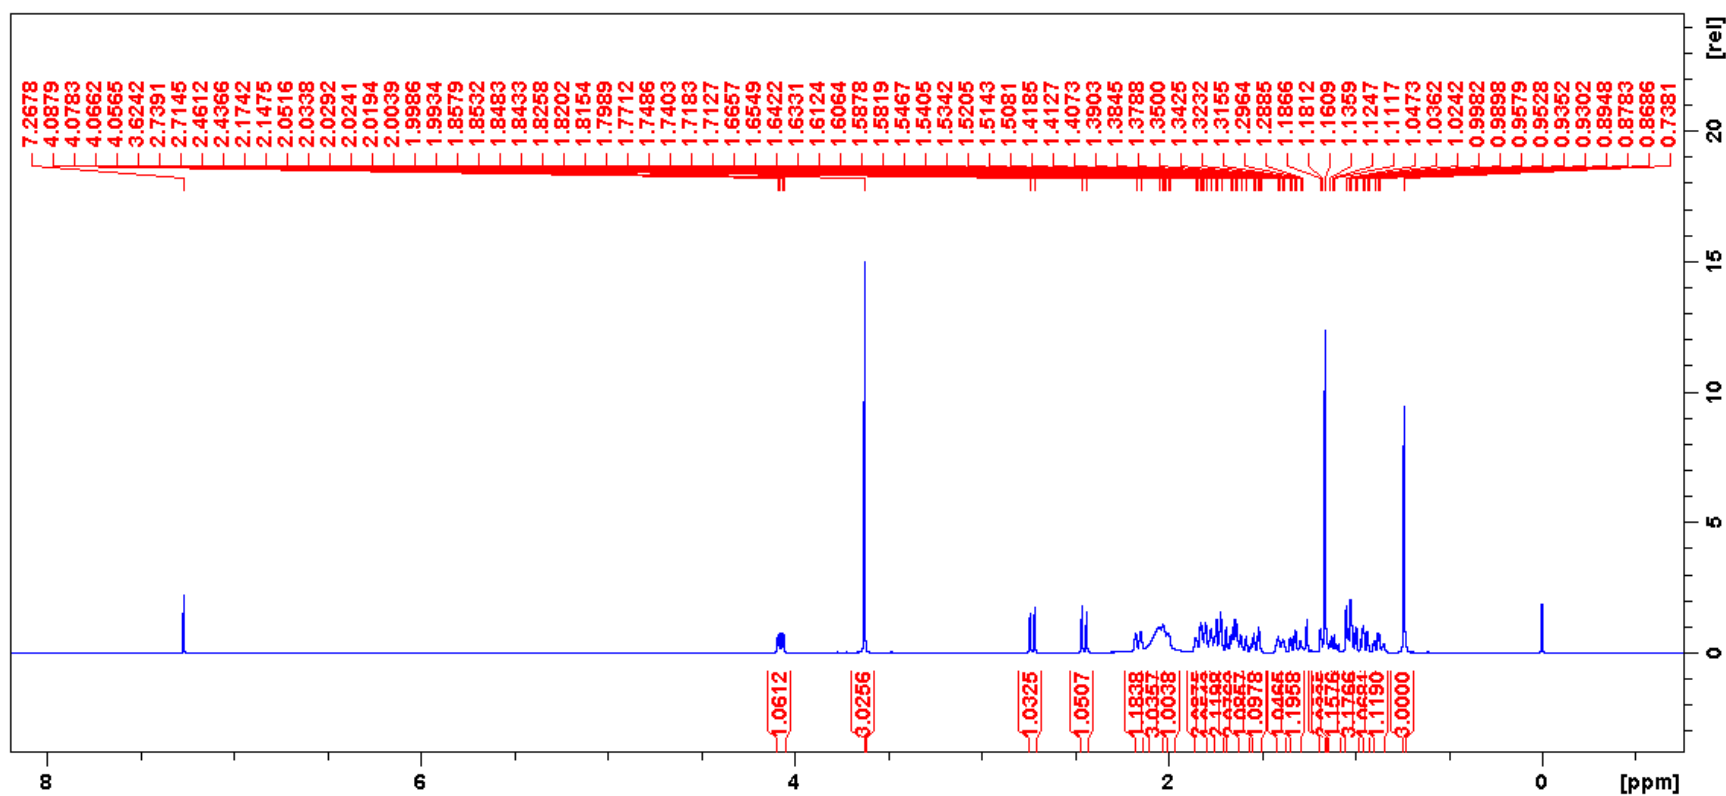

$^{13}\text{C}$ -NMR of compound (4*R*,4*aS*,6*aR*,8*R*,9*S*,11*aR*,11*bS*)-methyl 9-(aminomethyl)-8-hydroxy-4,11*b*-dimethyltetradecahydro-6*a*,9-methanocyclohepta[*a*]naphthalene-4-carboxylate (**31**)

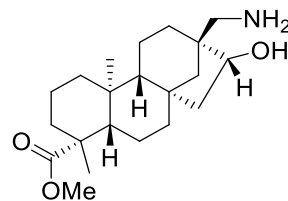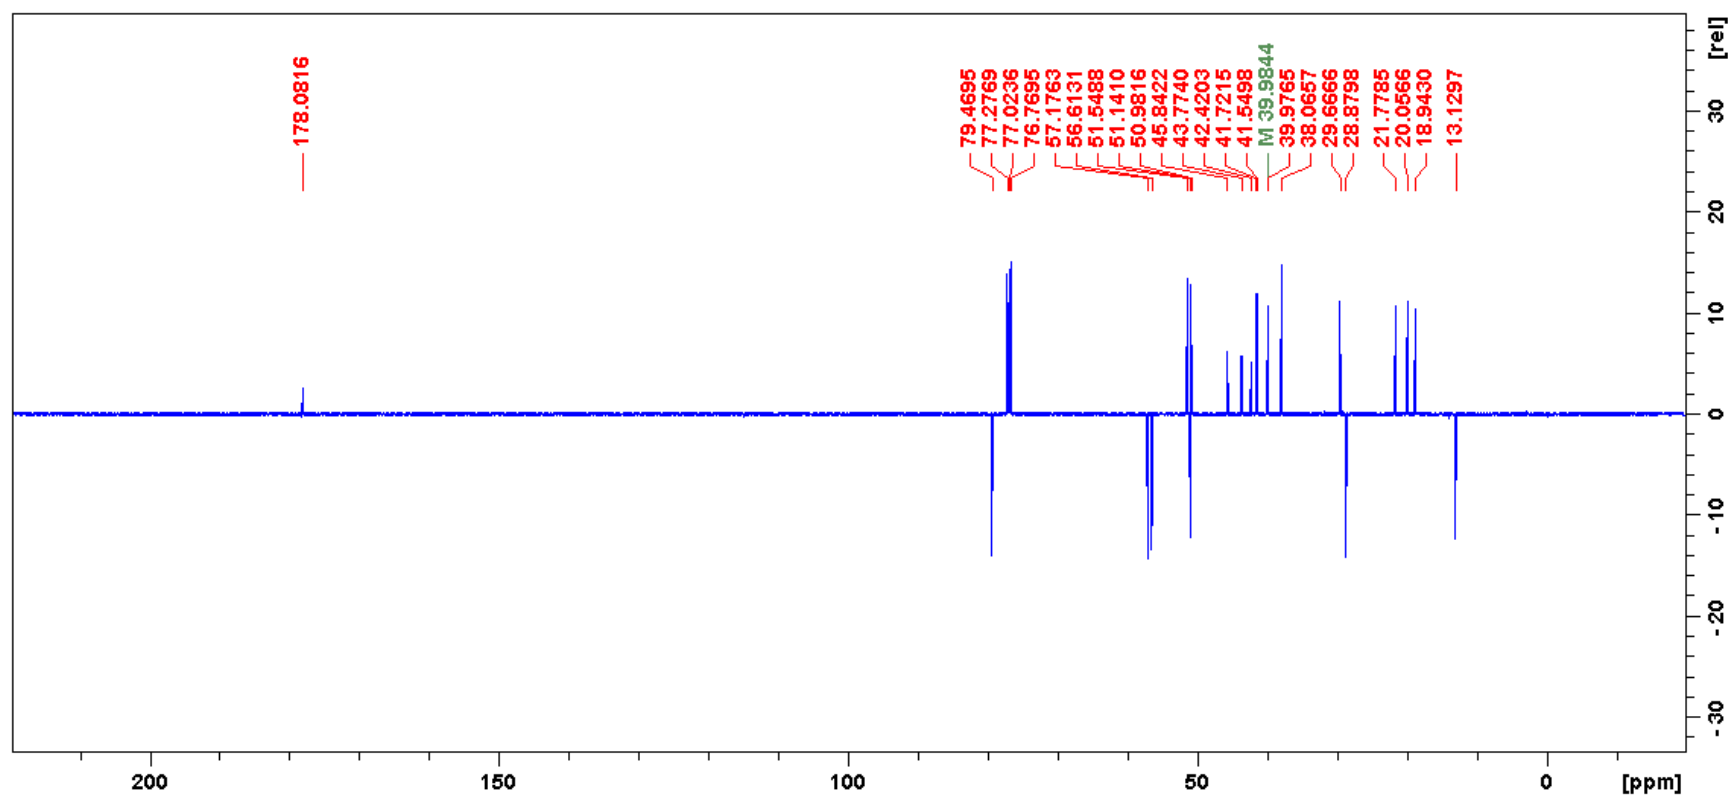

COSY of compound (4*R*,4*aS*,6*aR*,8*R*,9*S*,11*aR*,11*bS*)-methyl 9-(aminomethyl)-8-hydroxy-4,11b-dimethyltetradecahydro-6*a*,9-methanocyclohepta[*a*]naphthalene-4-carboxylate (**31**)

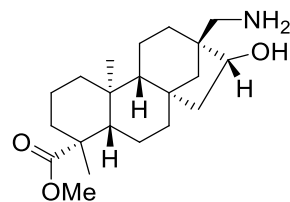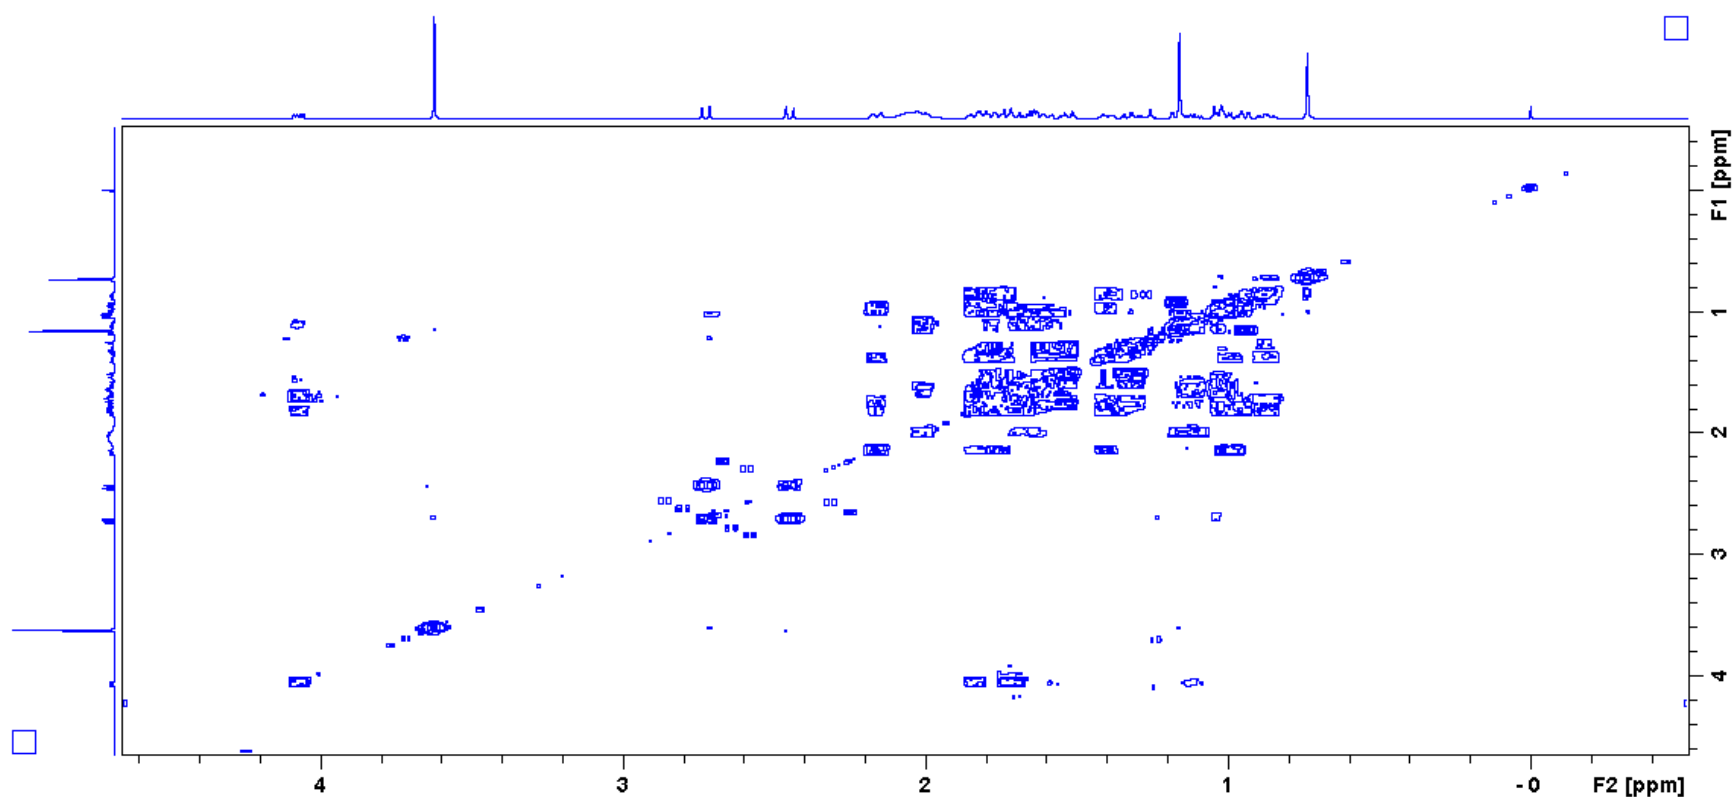



NOESY of compound (4*R*,4*aS*,6*aR*,8*R*,9*S*,11*aR*,11*bS*)-methyl 9-(aminomethyl)-8-hydroxy-4,11*b*-dimethyltetradecahydro-6*a*,9-methanocyclohepta[*a*]naphthalene-4-carboxylate (**31**)

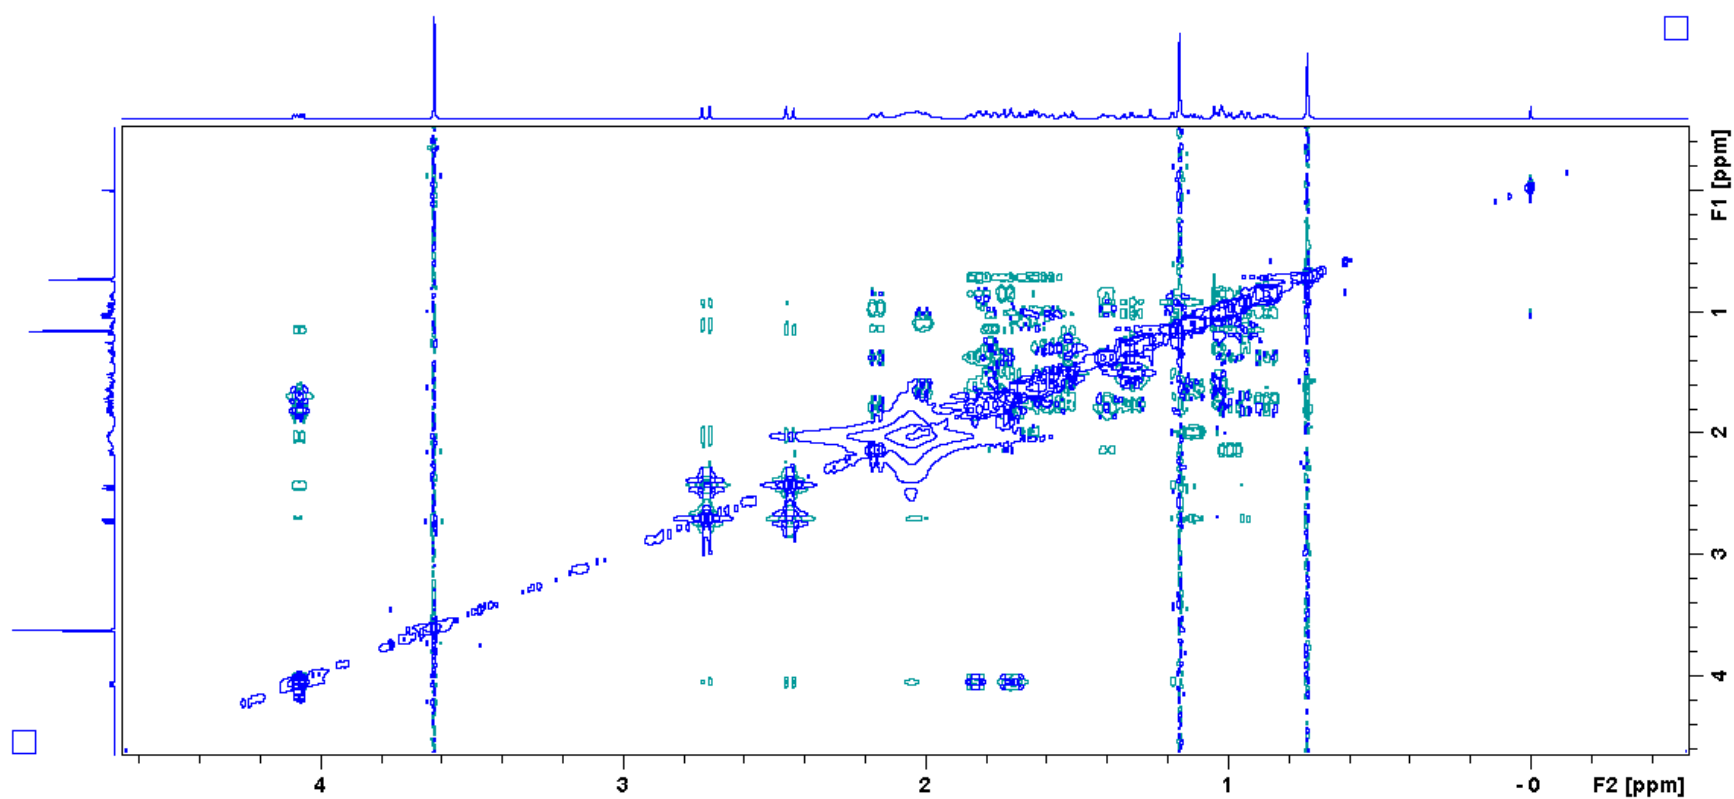

HSQC of compound (4*R*,4*aS*,6*aR*,8*R*,9*S*,11*aR*,11*bS*)-methyl 9-(aminomethyl)-8-hydroxy-4,11*b*-dimethyltetradecahydro-6*a*,9-methanocyclohepta[*a*]naphthalene-4-carboxylate (**31**)

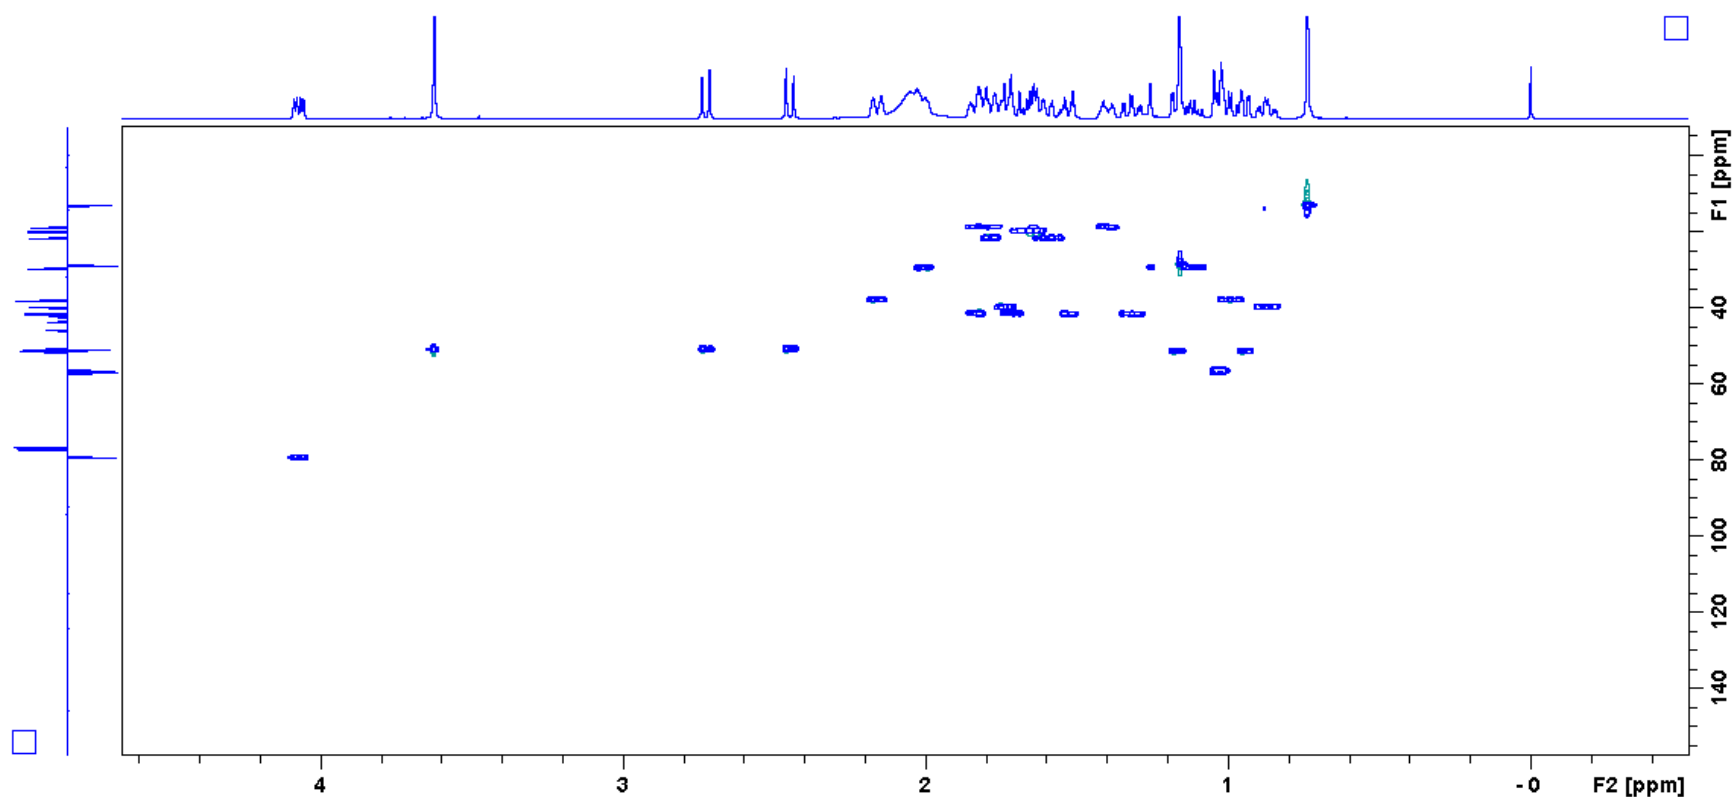

HMBC of compound (4*R*,4*aS*,6*aR*,8*R*,9*S*,11*aR*,11*bS*)-methyl 9-(aminomethyl)-8-hydroxy-4,11*b*-dimethyltetradecahydro-6*a*,9-methanocyclohepta[*a*]naphthalene-4-carboxylate (**31**)

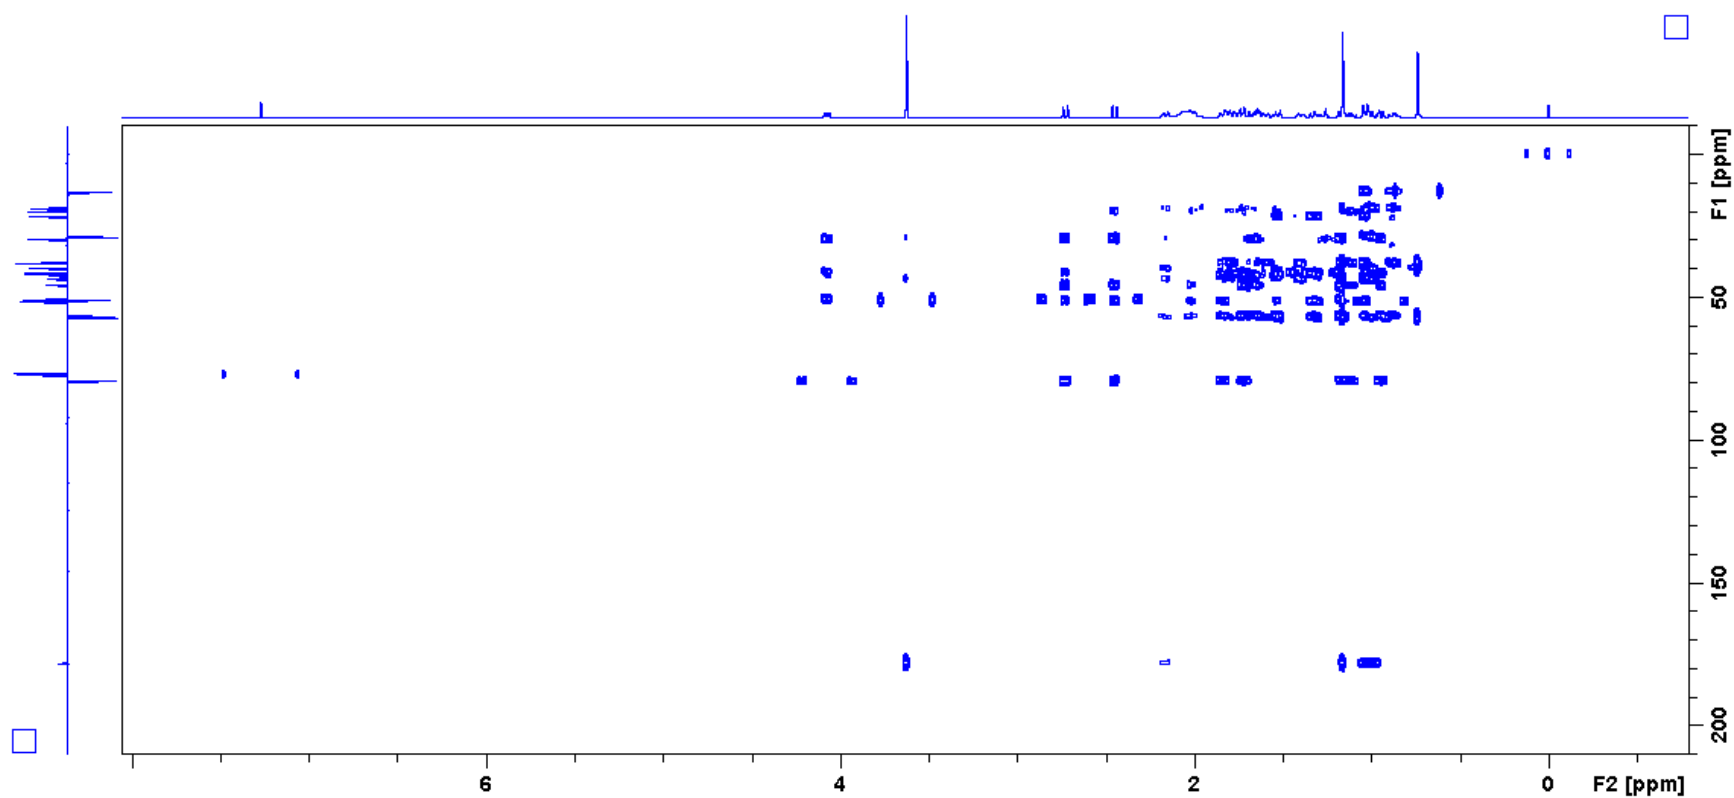

$^1\text{H}$ -NMR of compound (4*R*,4*aS*,6*aR*,8*R*,9*S*,11*aR*,11*bS*)-methyl 8-hydroxy-9-(((4-methoxybenzyl)amino)methyl)-4,11*b*-dimethyltetradecahydro-6*a*,9-methanocyclohepta[*a*]naphthalene-4-carboxylate (**32**)

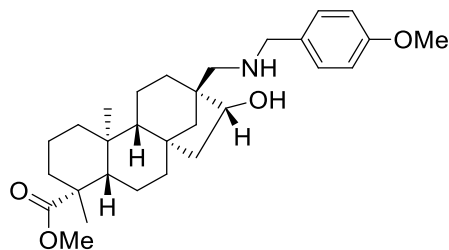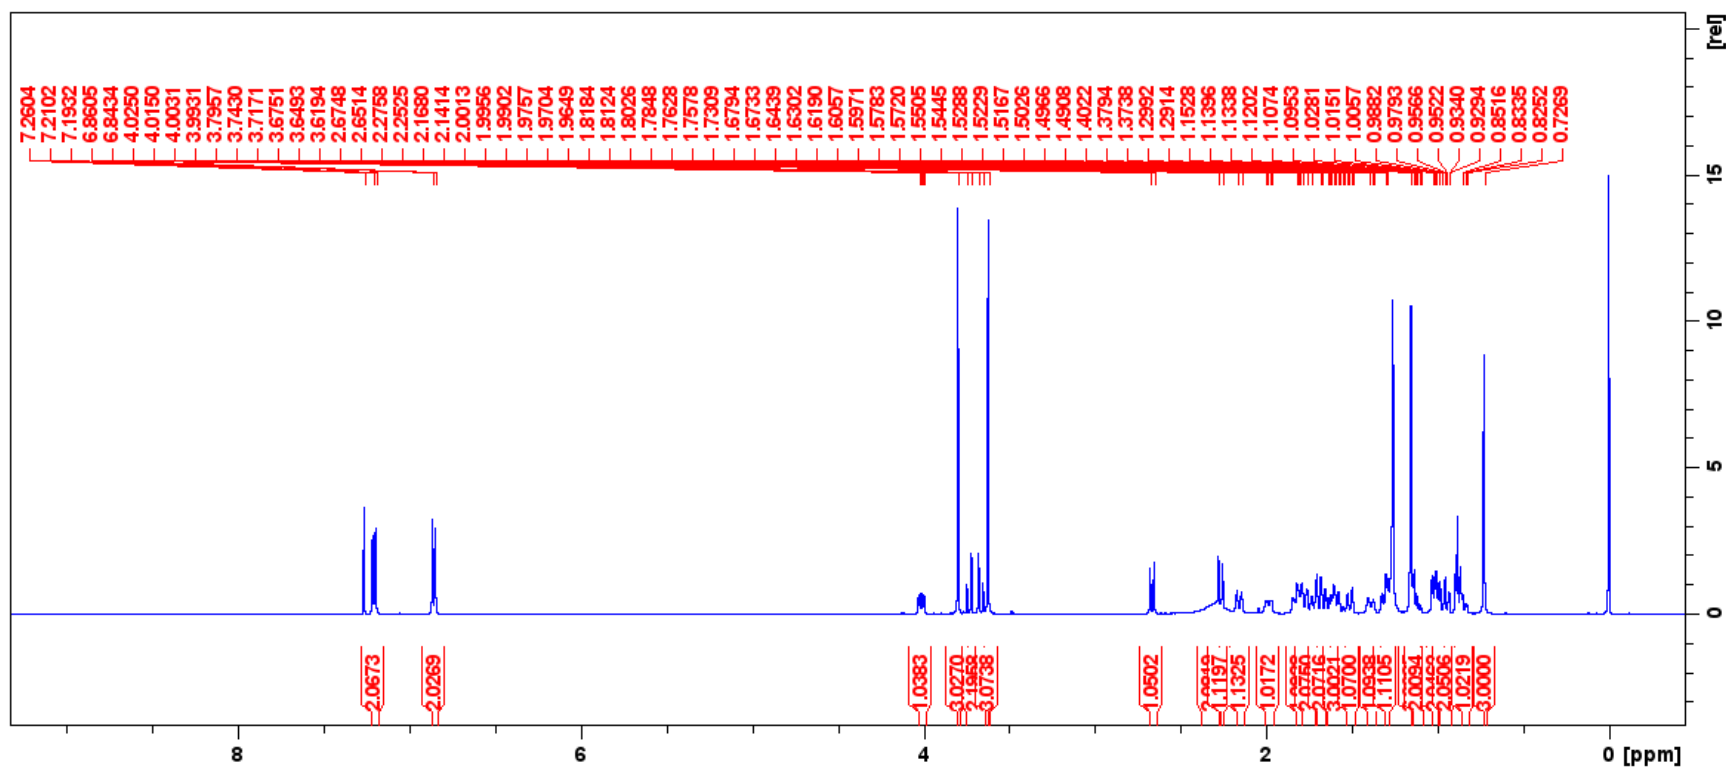

$^{13}\text{C}$ -NMR of compound (4*R*,4*aS*,6*aR*,8*R*,9*S*,11*aR*,11*bS*)-methyl 8-hydroxy-9-(((4-methoxybenzyl)amino)methyl)-4,11b-dimethyltetradecahydro-6*a*,9-methanocyclohepta[*a*]naphthalene-4-carboxylate (**32**)

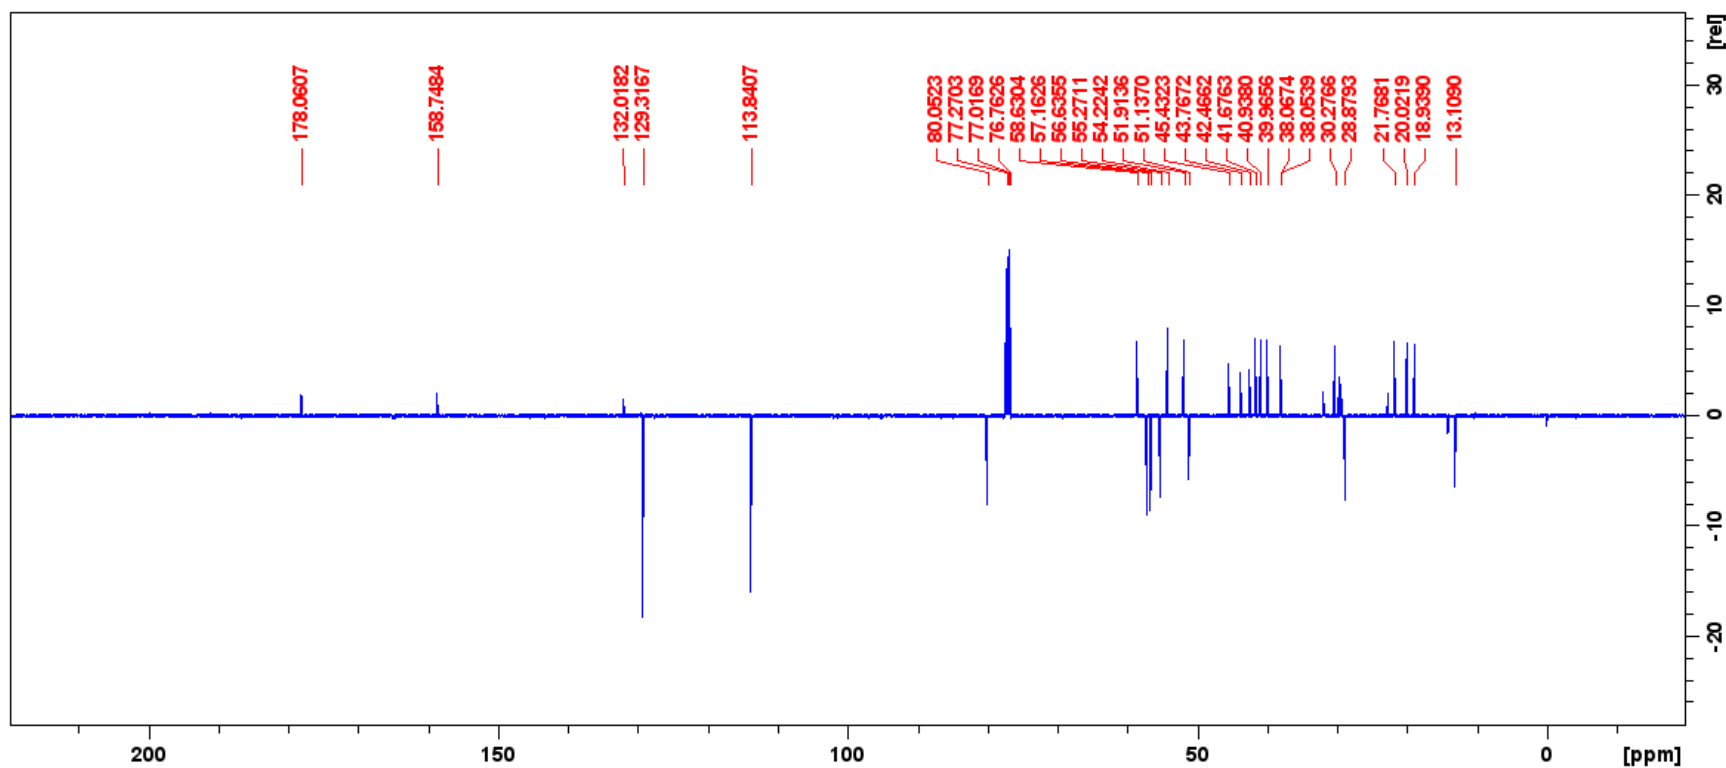

COSY of compound (4*R*,4*aS*,6*aR*,8*R*,9*S*,11*aR*,11*bS*)-methyl 8-hydroxy-9-(((4-methoxybenzyl)amino)methyl)-4,11b-dimethyltetradecahydro-6*a*,9-methanocyclohepta[*a*]naphthalene-4-carboxylate (**32**)

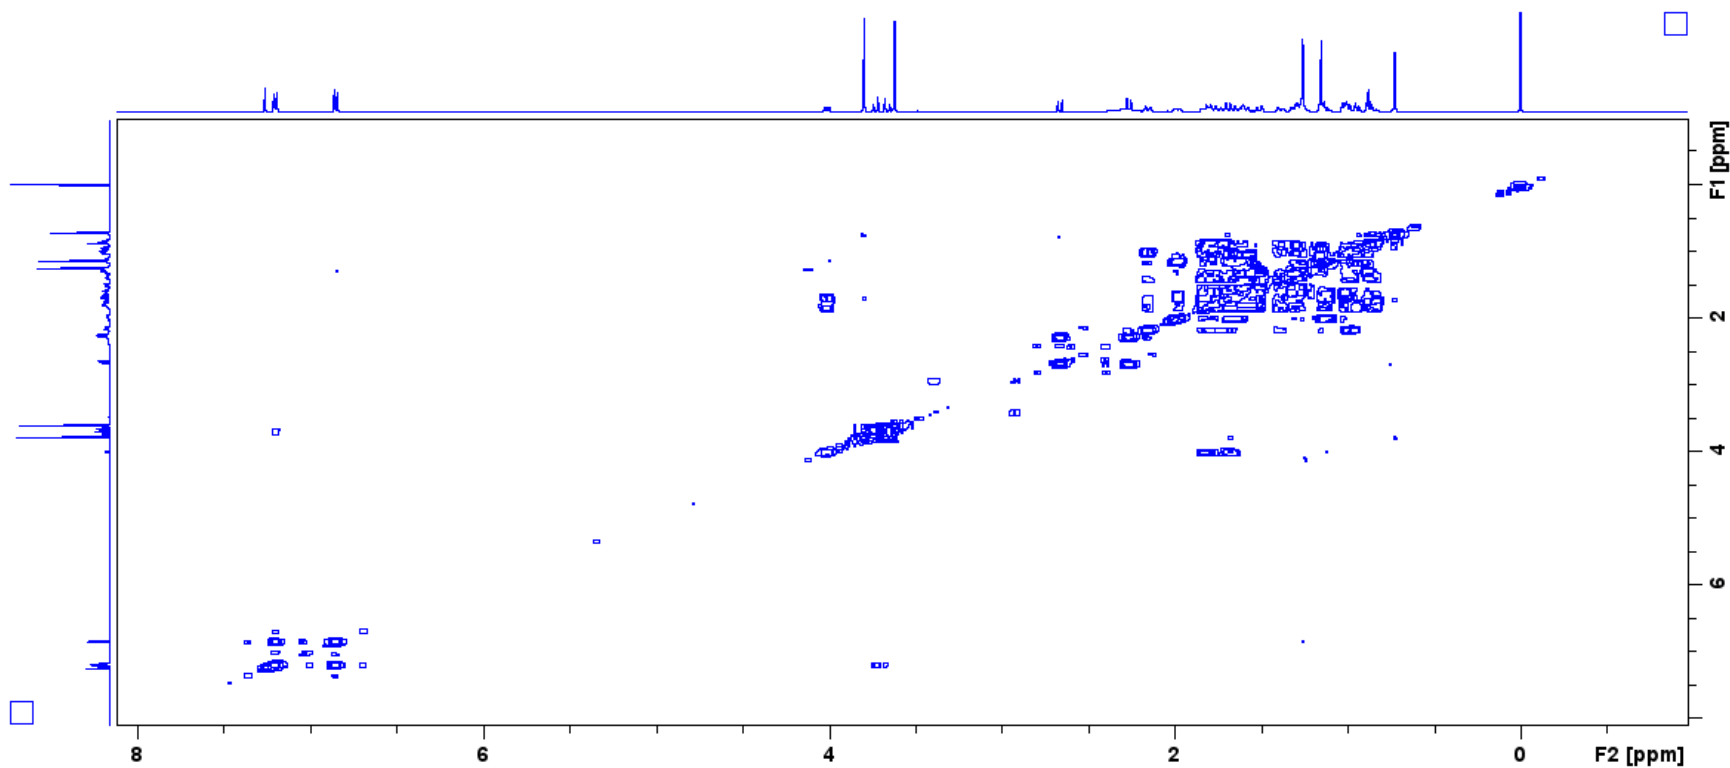

NOESY of compound (4*R*,4*aS*,6*aR*,8*R*,9*S*,11*aR*,11*bS*)-methyl 8-hydroxy-9-(((4-methoxybenzyl)amino)methyl)-4,11b-dimethyltetradecahydro-6*a*,9-methanocyclohepta[*a*]naphthalene-4-carboxylate (**32**)

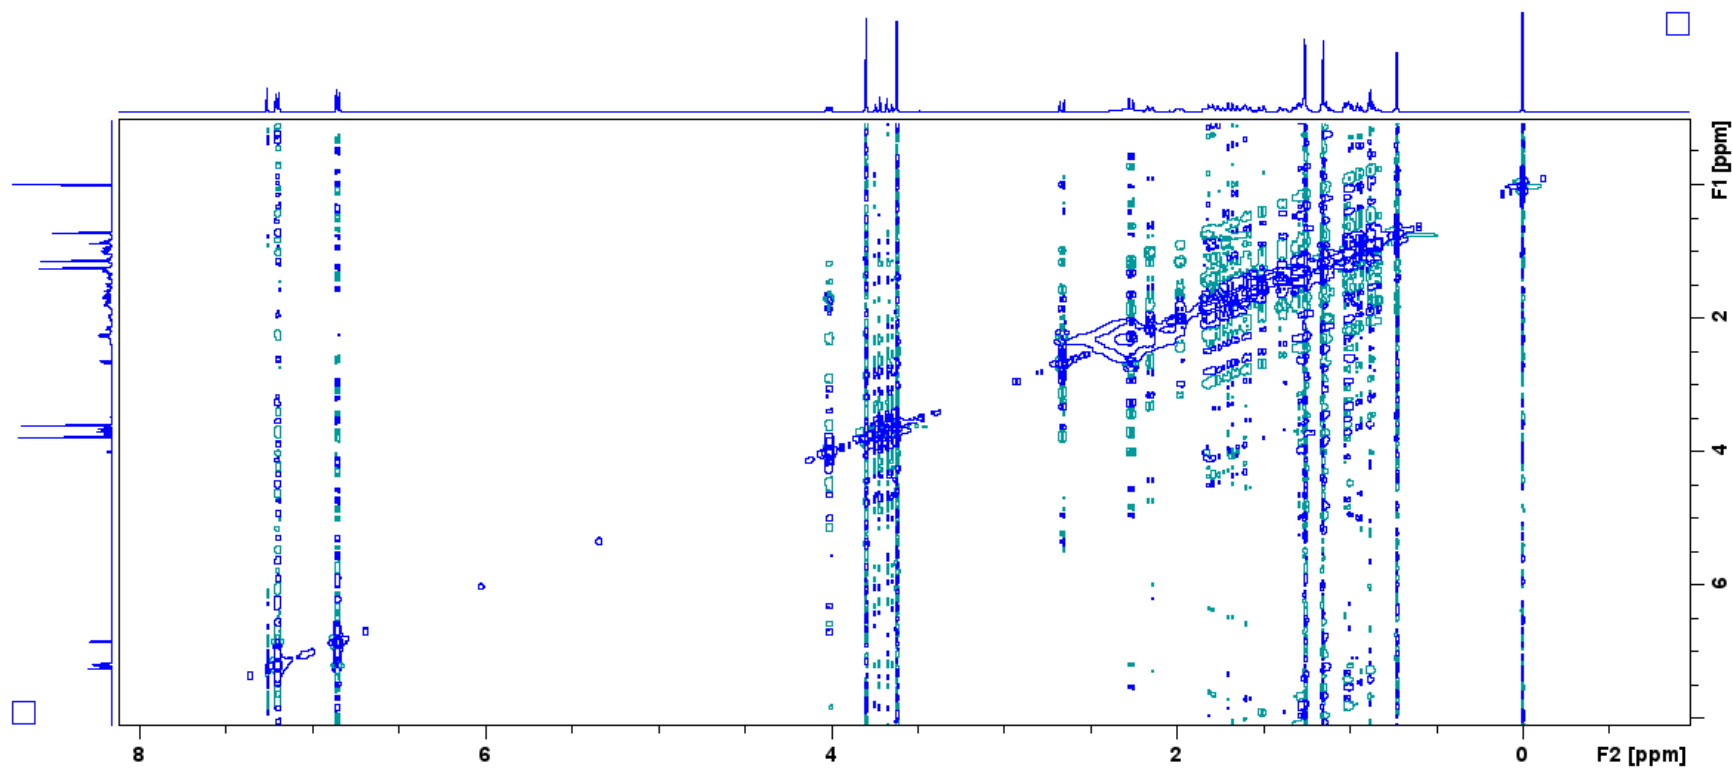

HSQC of compound (4*R*,4*aS*,6*aR*,8*R*,9*S*,11*aR*,11*bS*)-methyl 8-hydroxy-9-(((4-methoxybenzyl)amino)methyl)-4,11b-dimethyltetradecahydro-6*a*,9-methanocyclohepta[*a*]naphthalene-4-carboxylate (**32**)

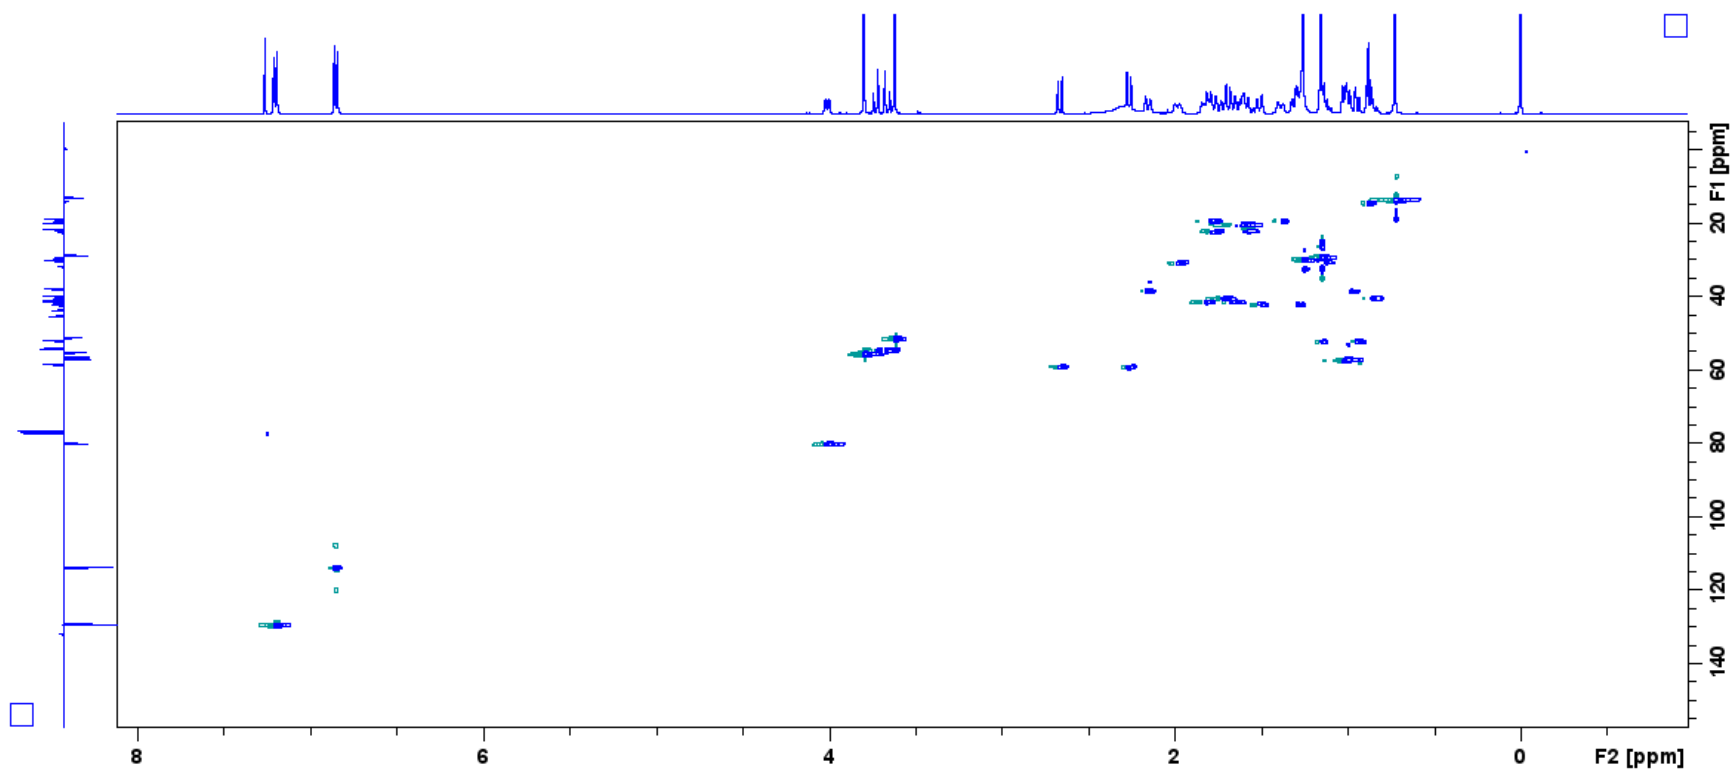



HMBC of compound (4*R*,4*aS*,6*aR*,8*R*,9*S*,11*aR*,11*bS*)-methyl 8-hydroxy-9-(((4-methoxybenzyl)amino)methyl)-4,11b-dimethyltetradecahydro-6*a*,9-methanocyclohepta[*a*]naphthalene-4-carboxylate (**32**)

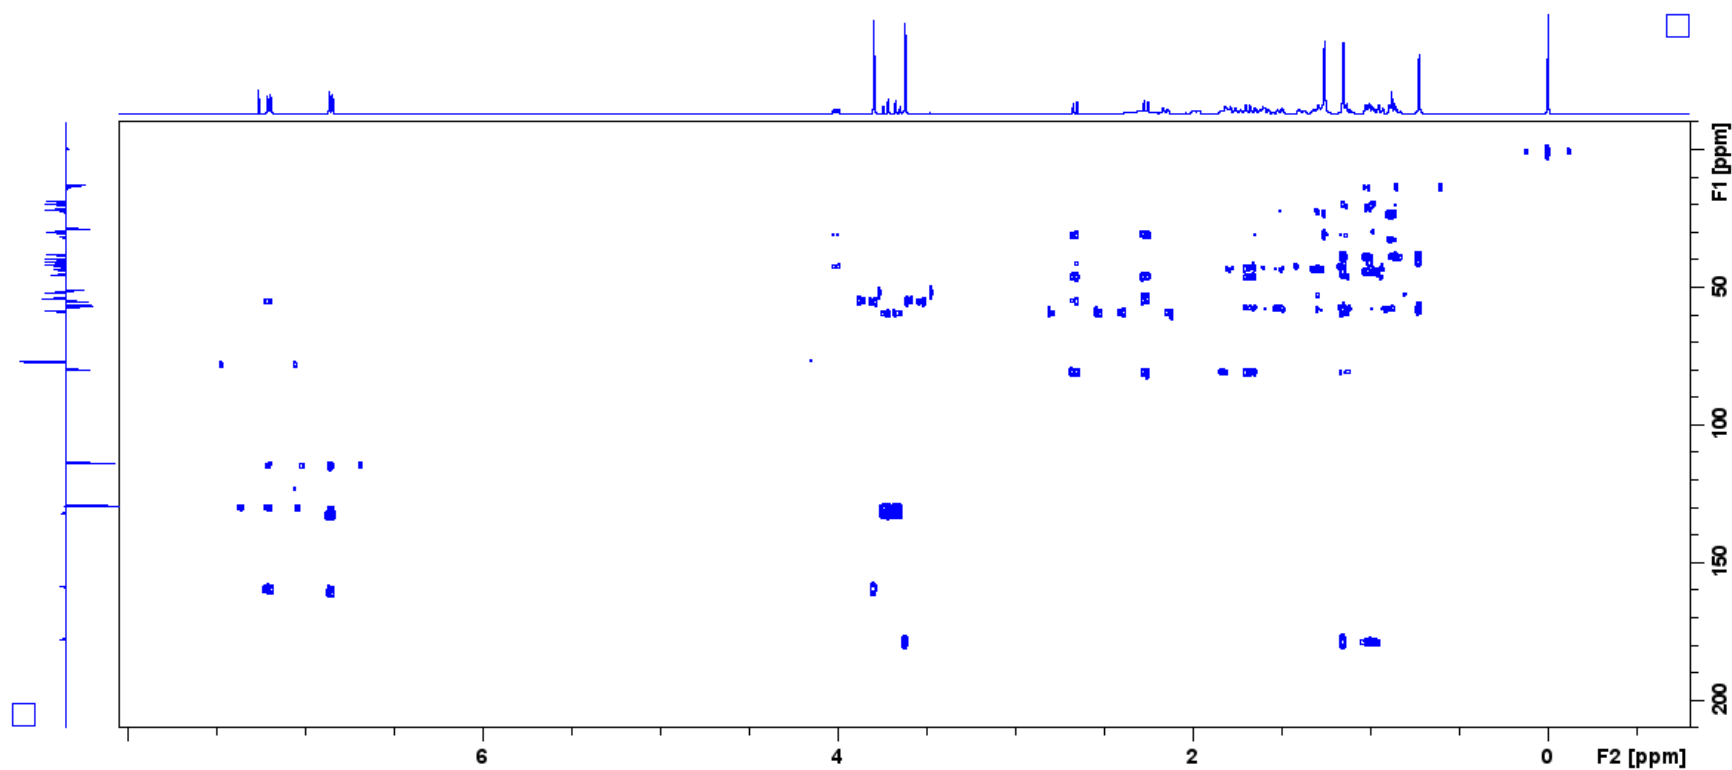

<sup>1</sup>H-NMR of compound (4*R*,4*aS*,6*aR*,9*S*,11*aR*,11*bS*)-methyl 4,11*b*-dimethyl-8-oxo-9-((4-phenyl-1*H*-1,2,3-triazol-1-yl)methyl)tetradecahydro-6*a*,9-methanocyclohepta[*a*]naphthalene-4-carboxylate (**33**)

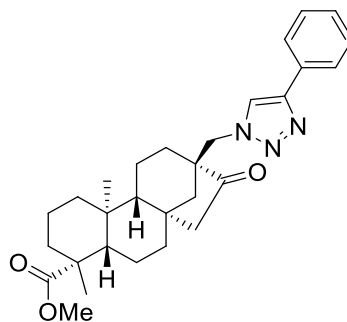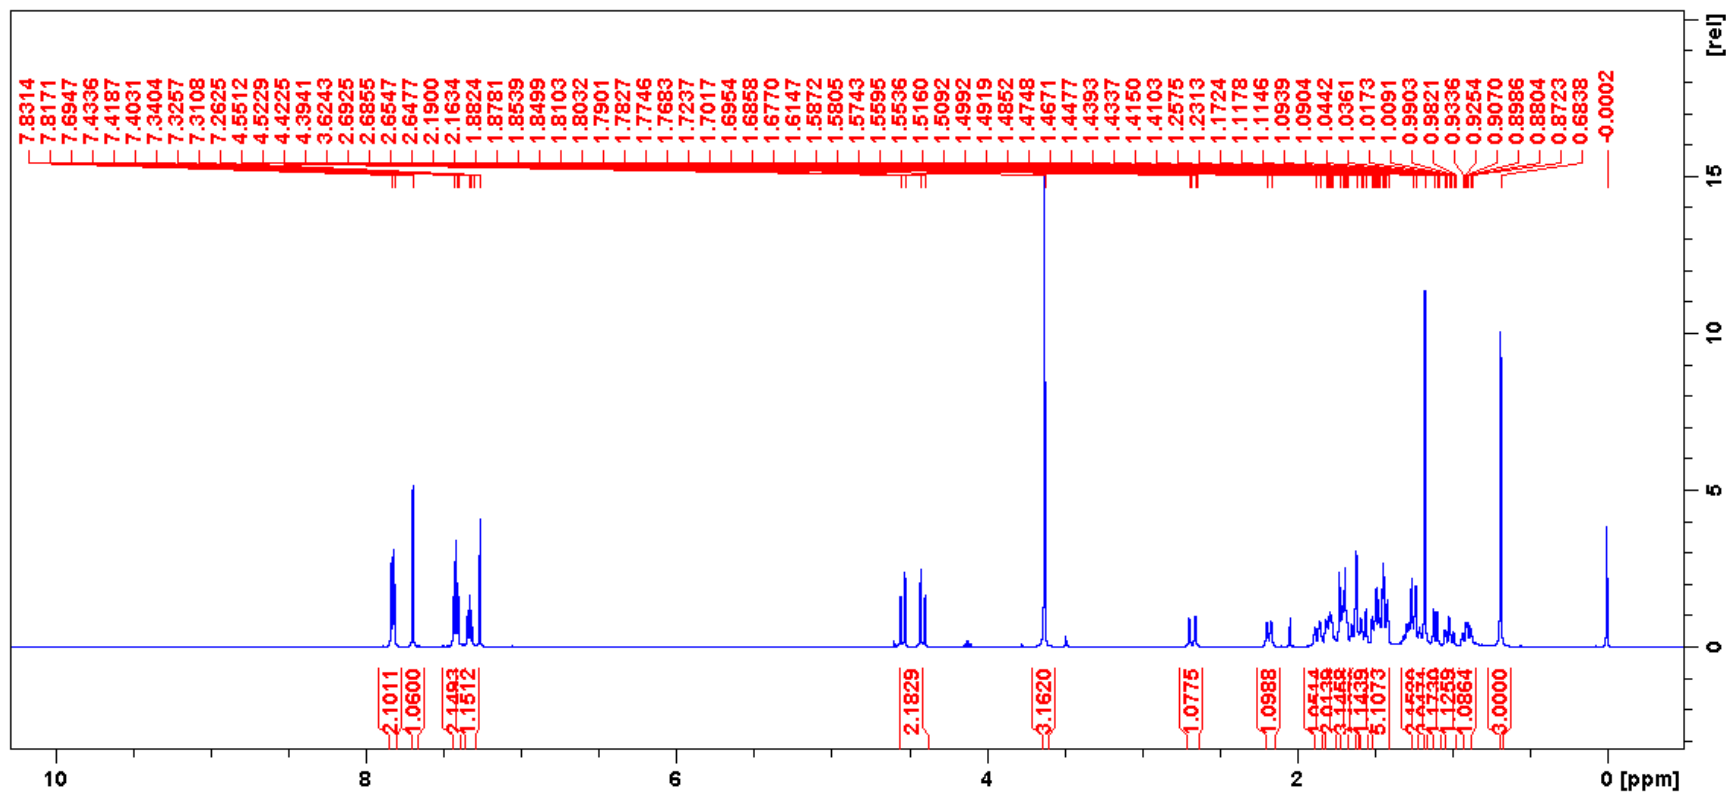

$^{13}\text{C}$ -NMR of compound (4*R*,4*aS*,6*aR*,9*S*,11*aR*,11*bS*)-methyl 4,11*b*-dimethyl-8-oxo-9-((4-phenyl-1*H*-1,2,3-triazol-1-yl)methyl)tetradecahydro-6*a*,9-methanocyclohepta[*a*]naphthalene-4-carboxylate (**33**)

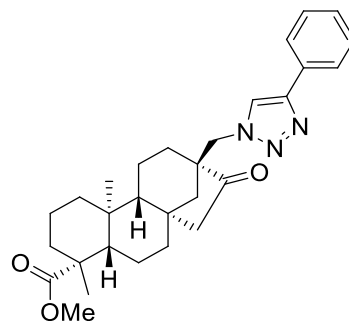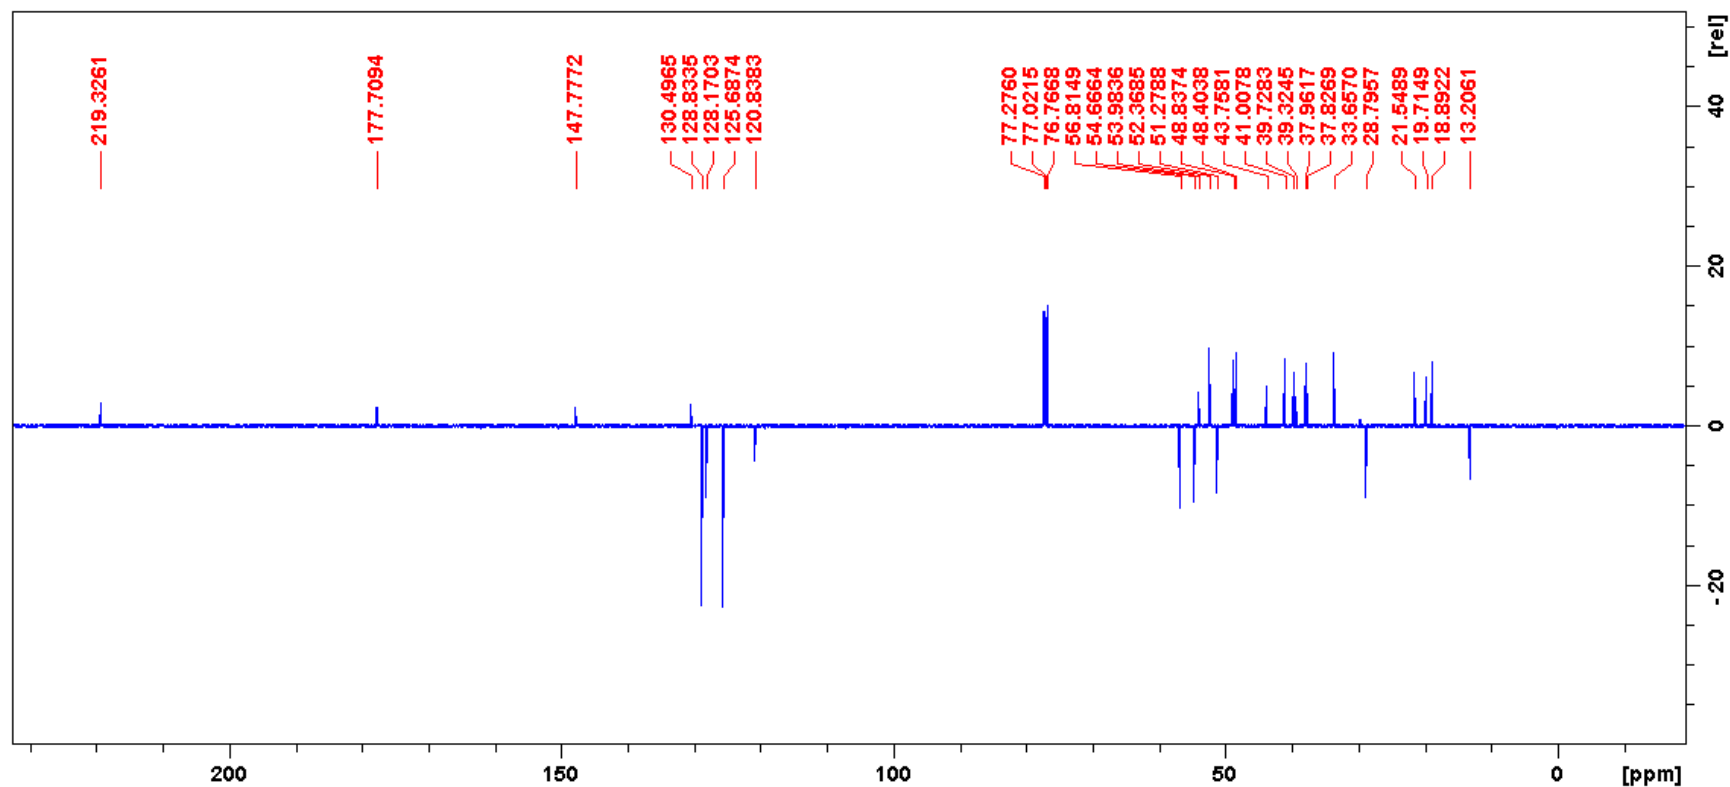

COSY of compound (4*R*,4*aS*,6*aR*,9*S*,11*aR*,11*bS*)-methyl 4,11*b*-dimethyl-8-oxo-9-((4-phenyl-1*H*-1,2,3-triazol-1-yl)methyl)tetradecahydro-6*a*,9-methanocyclohepta[*a*]naphthalene-4-carboxylate (**33**)

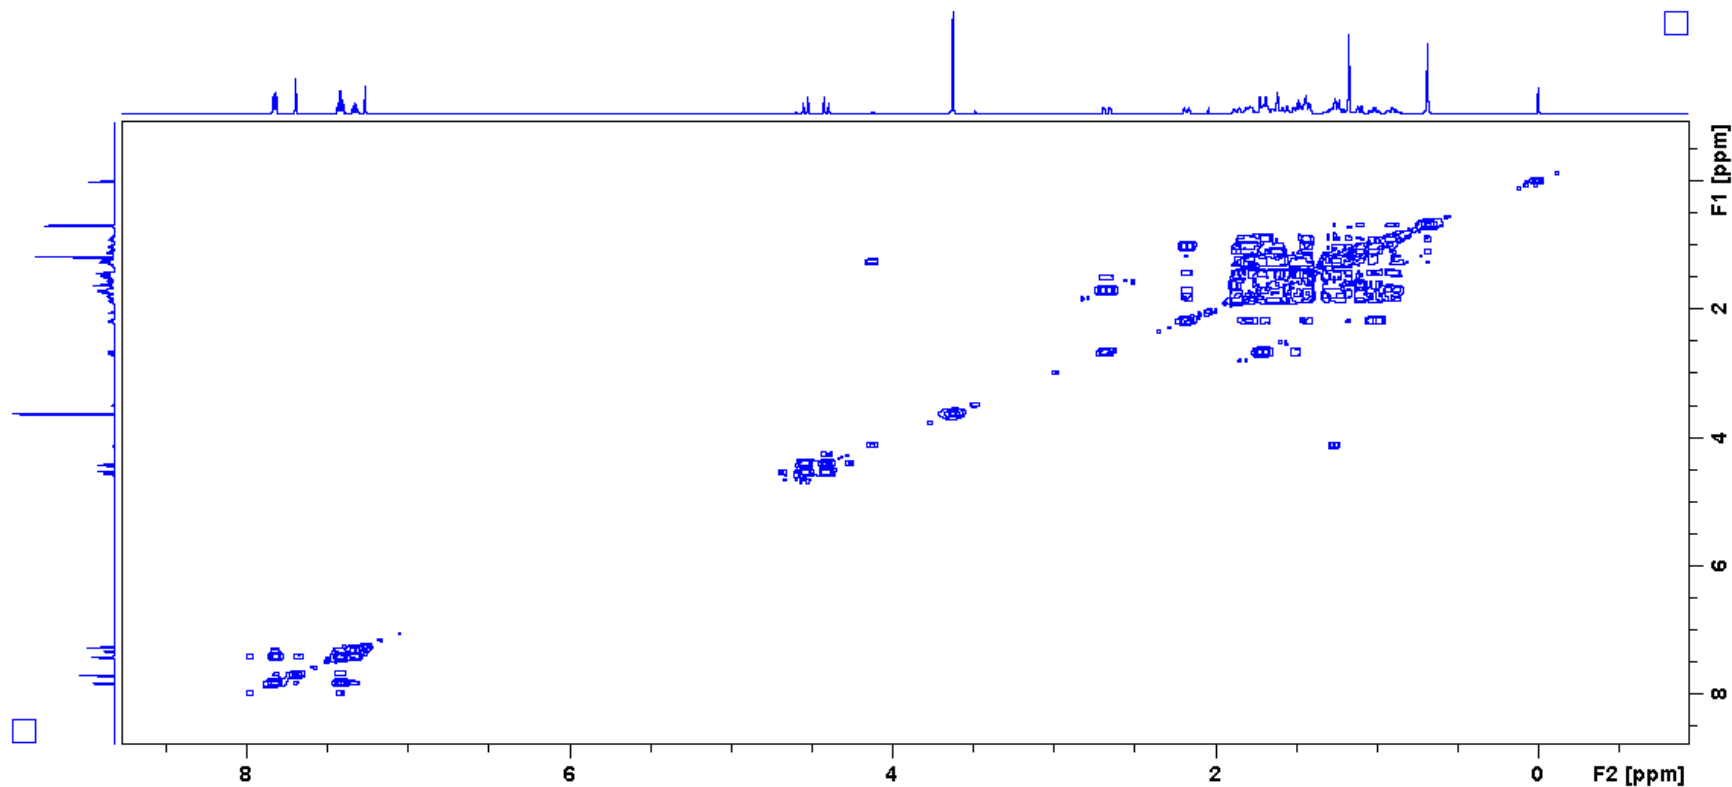

NOESY of compound (4*R*,4*aS*,6*aR*,9*S*,11*aR*,11*bS*)-methyl 4,11b-dimethyl-8-oxo-9-((4-phenyl-1*H*-1,2,3-triazol-1-yl)methyl)tetradecahydro-6*a*,9-methanocyclohepta[*a*]naphthalene-4-carboxylate (**33**)

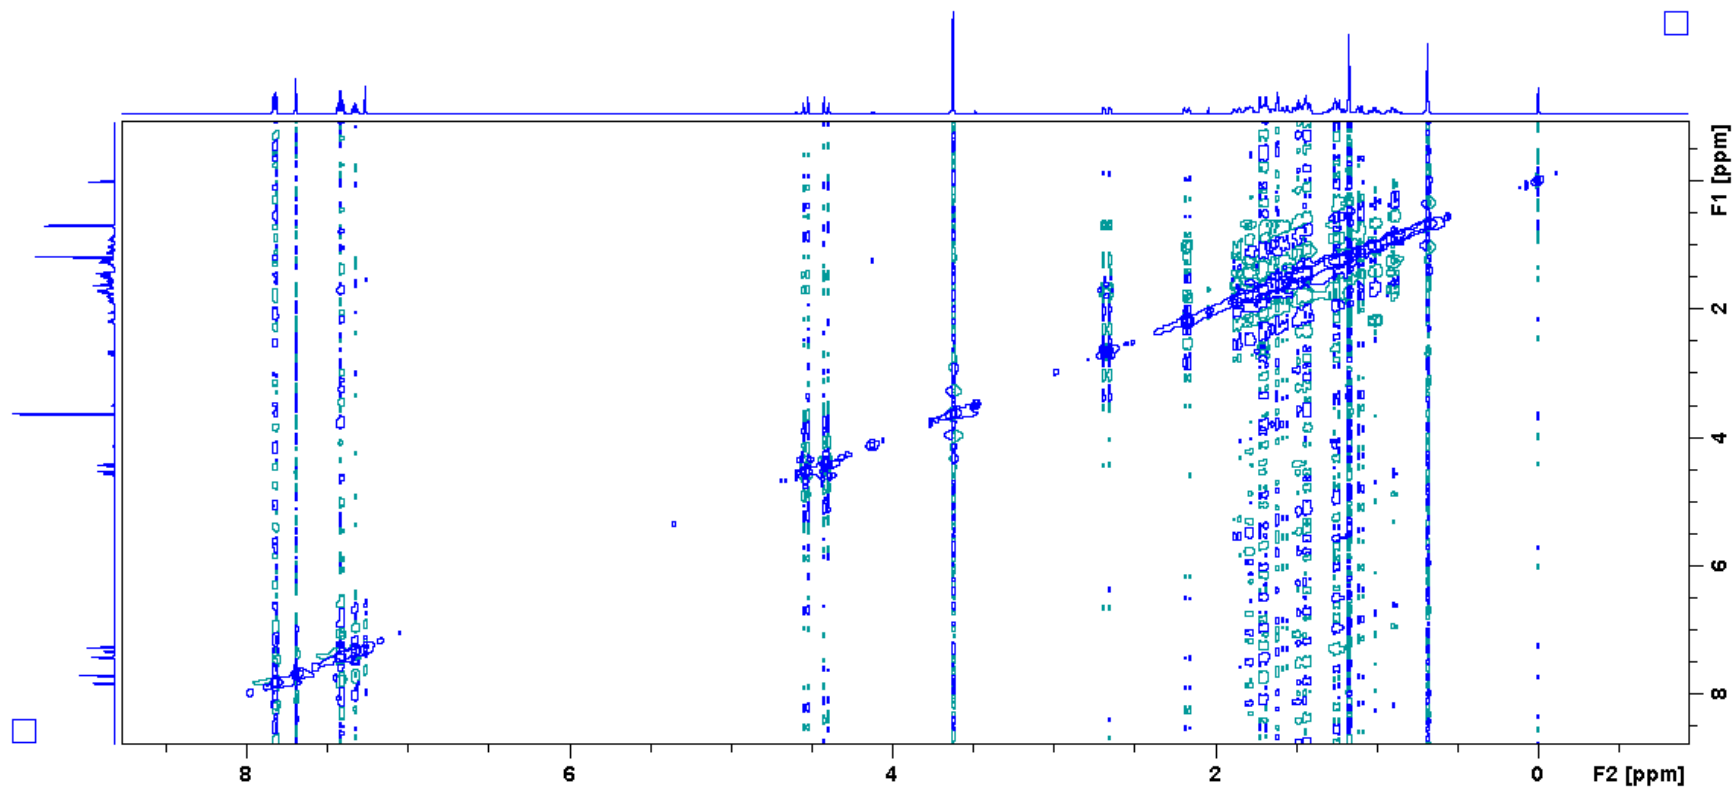

HSQC of compound (4*R*,4*aS*,6*aR*,9*S*,11*aR*,11*bS*)-methyl 4,11b-dimethyl-8-oxo-9-((4-phenyl-1*H*-1,2,3-triazol-1-yl)methyl)tetradecahydro-6*a*,9-methanocyclohepta[*a*]naphthalene-4-carboxylate (**33**)

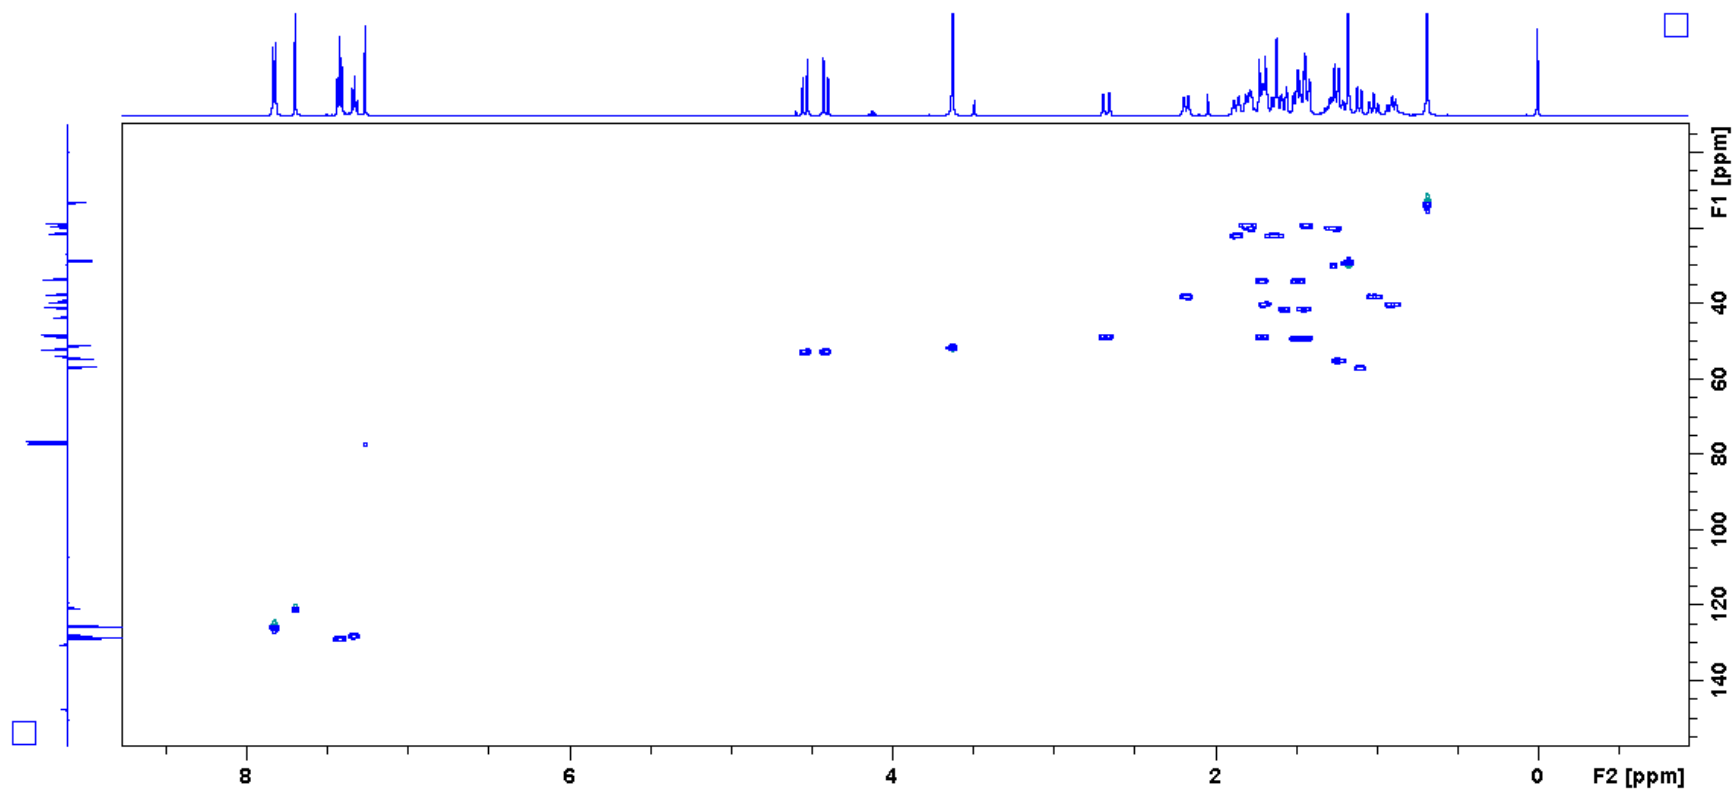

HMBC of compound (4*R*,4*aS*,6*aR*,9*S*,11*aR*,11*bS*)-methyl 4,11*b*-dimethyl-8-oxo-9-((4-phenyl-1*H*-1,2,3-triazol-1-yl)methyl)tetradecahydro-6*a*,9-methanocyclohepta[*a*]naphthalene-4-carboxylate (**33**)

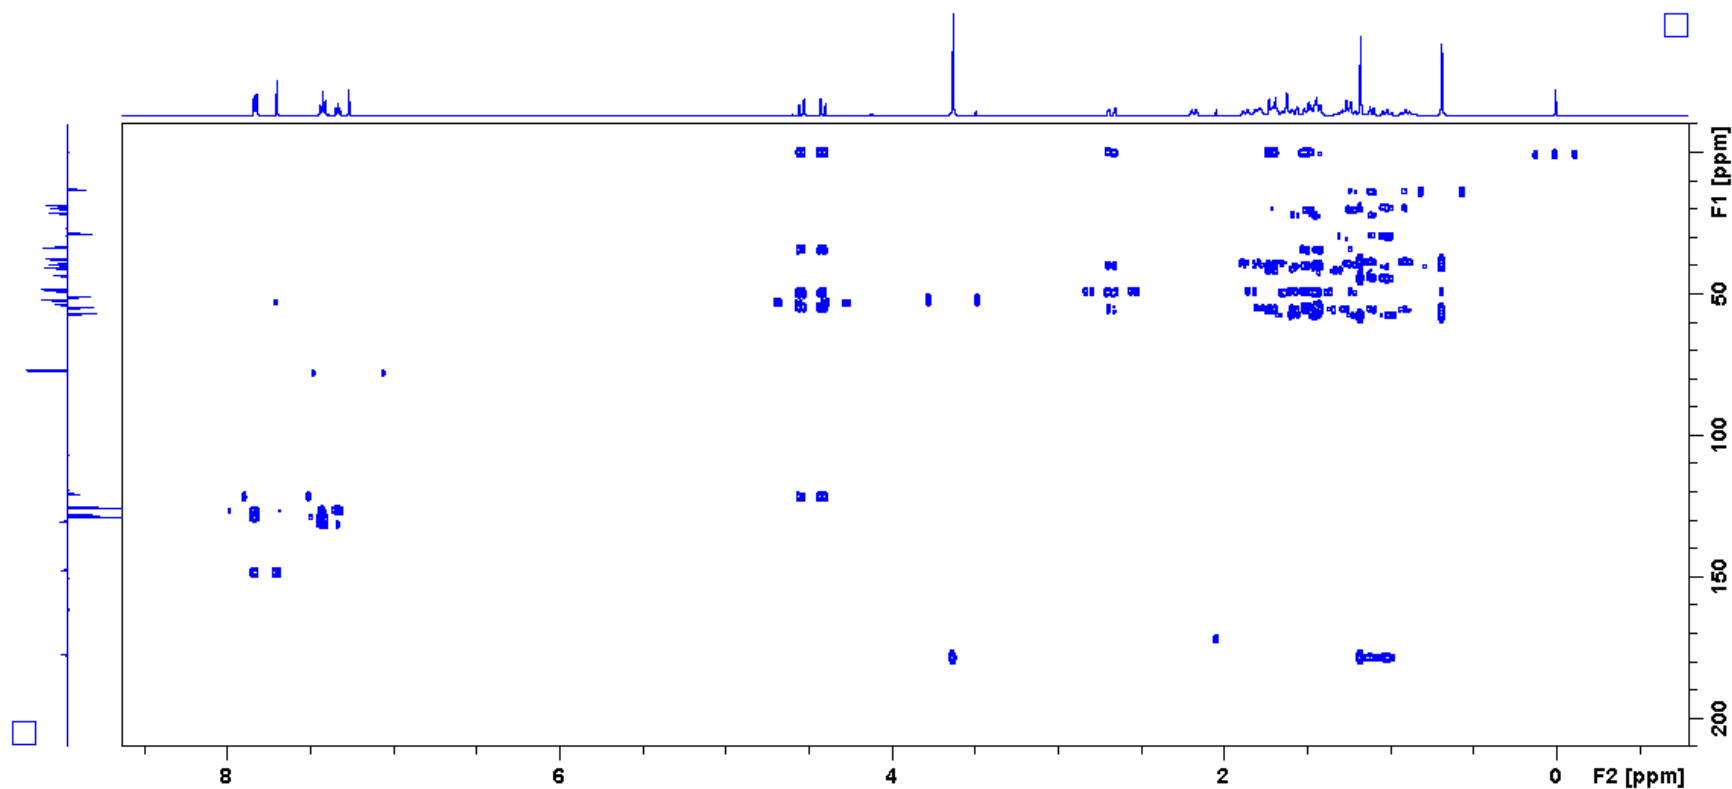

$^1\text{H}$ -NMR of compound (4*R*,4*aS*,6*aR*,9*S*,11*aR*,11*bS*)-methyl 9-((4-benzyl-1*H*-1,2,3-triazol-1-yl)methyl)-4,11*b*-dimethyl-8-oxotetradecahydro-6*a*,9-methanocyclohepta[*a*]naphthalene-4-carboxylate (**34**)

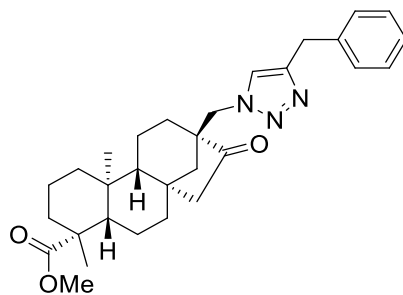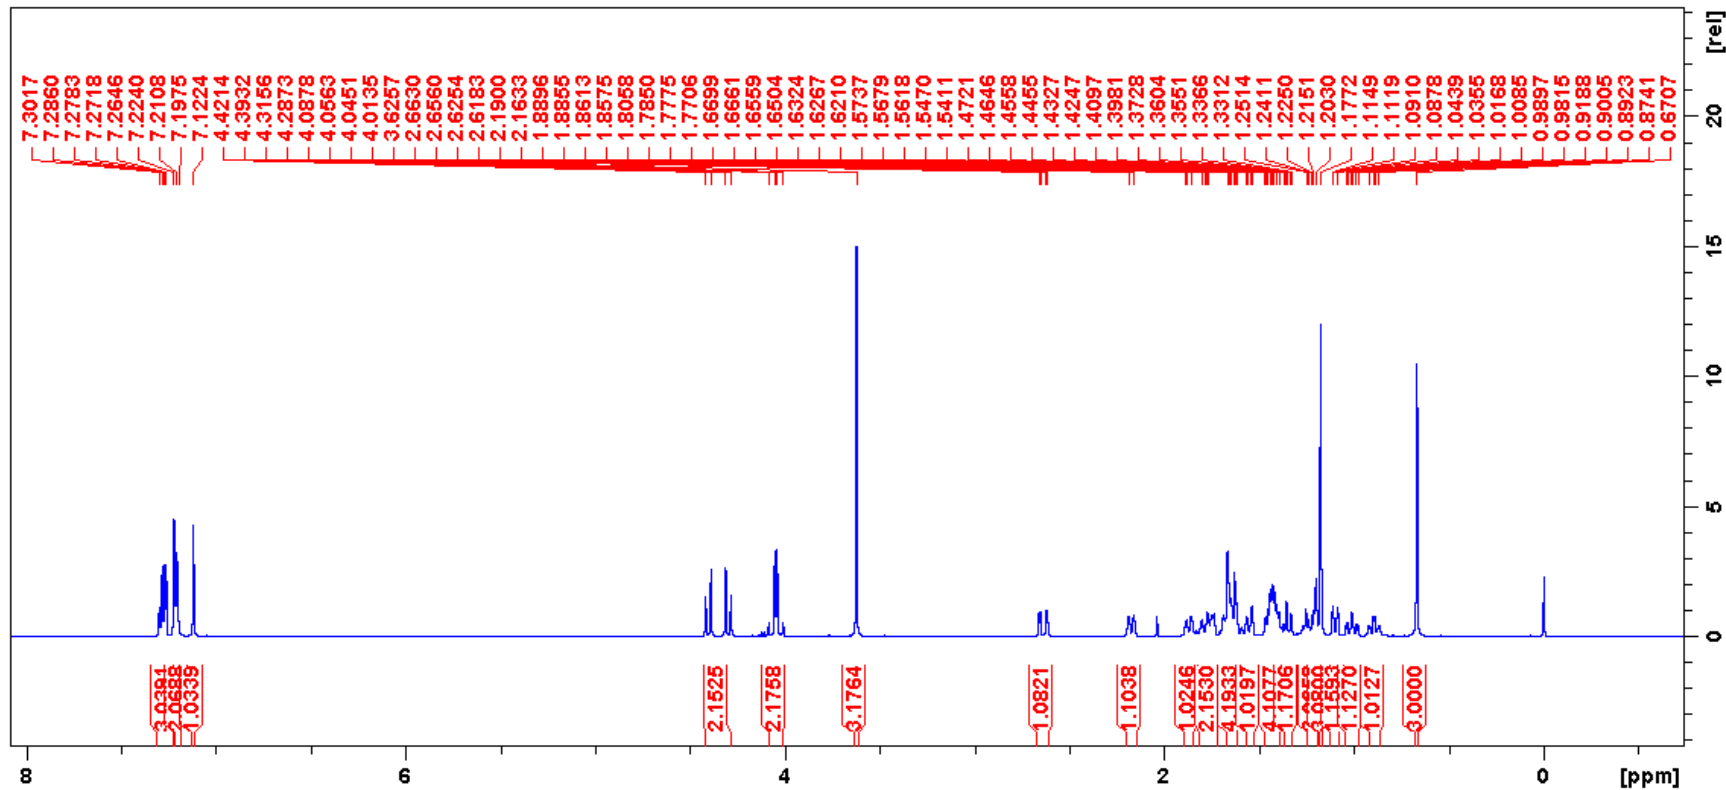



$^{13}\text{C}$ -NMR of compound (4*R*,4*aS*,6*aR*,9*S*,11*aR*,11*bS*)-methyl 9-((4-benzyl-1*H*-1,2,3-triazol-1-yl)methyl)-4,11*b*-dimethyl-8-oxotetradecahydro-6*a*,9-methanocyclohepta[*a*]naphthalene-4-carboxylate (**34**)

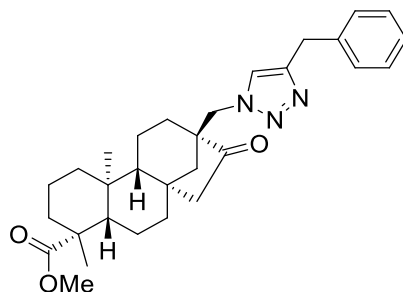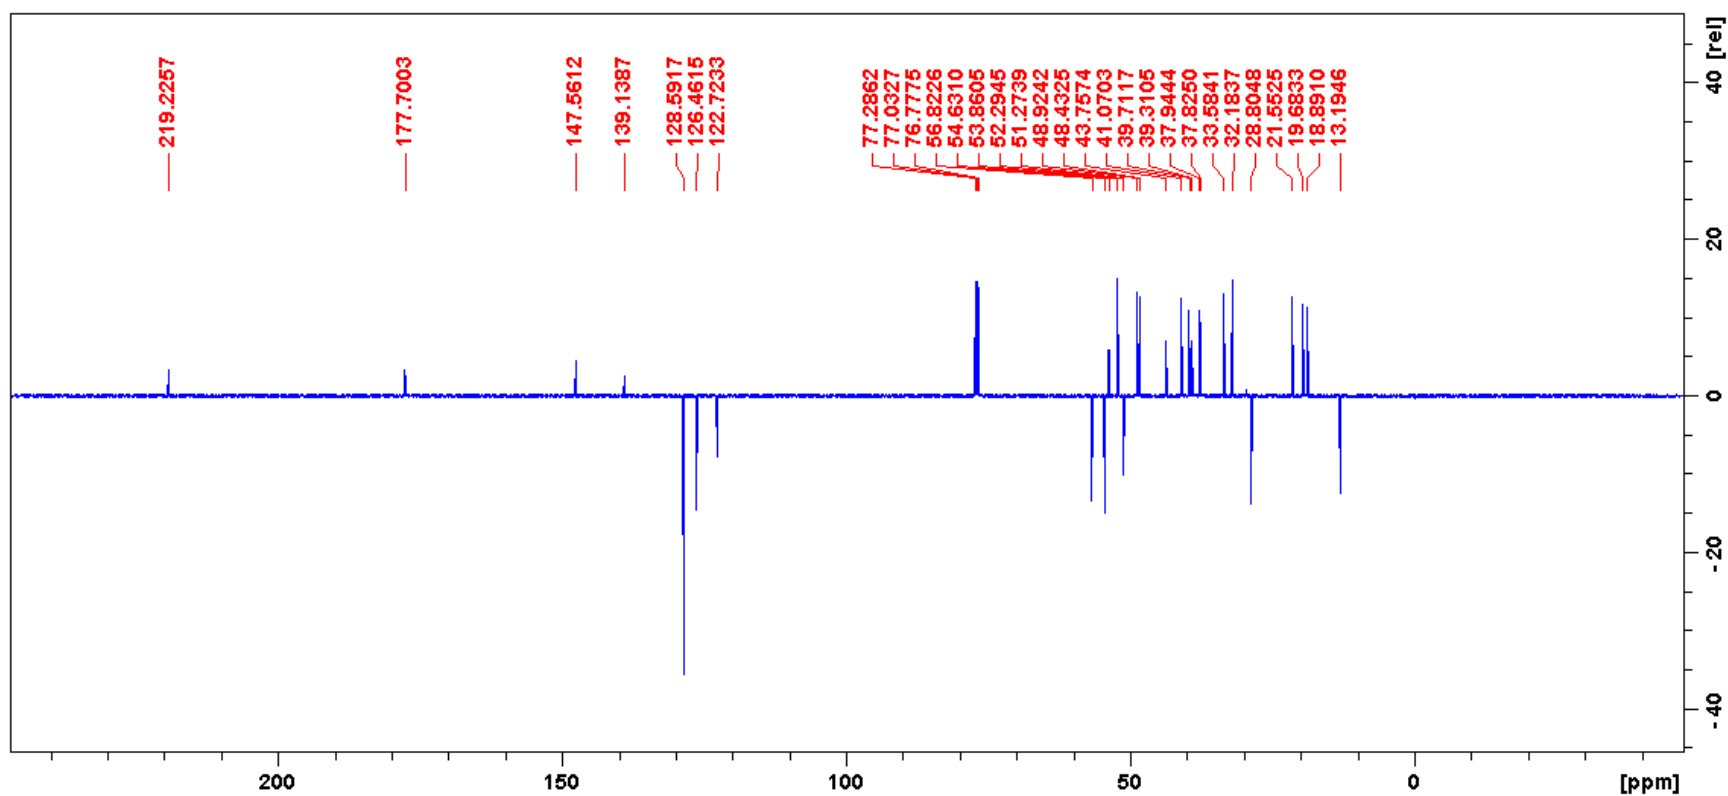

COSY of compound (4*R*,4*aS*,6*aR*,9*S*,11*aR*,11*bS*)-methyl 9-((4-benzyl-1*H*-1,2,3-triazol-1-yl)methyl)-4,11*b*-dimethyl-8-oxotetradecahydro-6*a*,9-methanocyclohepta[*a*]naphthalene-4-carboxylate (**34**)

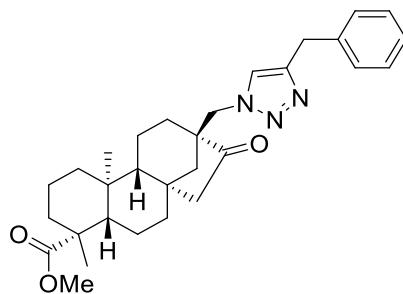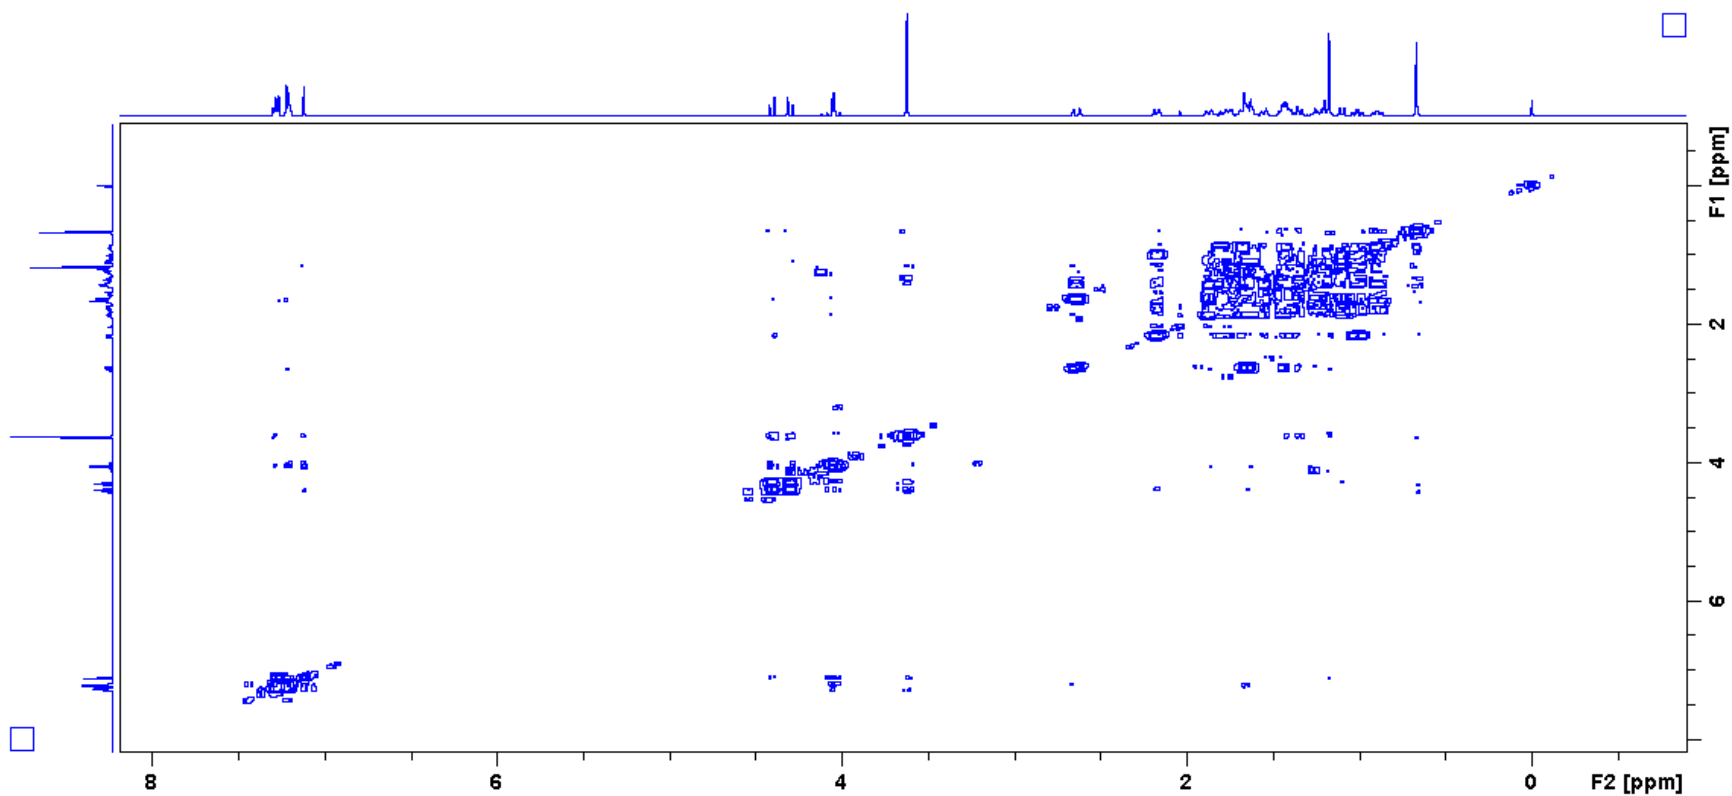

NOESY of compound (4*R*,4*aS*,6*aR*,9*S*,11*aR*,11*bS*)-methyl 9-((4-benzyl-1*H*-1,2,3-triazol-1-yl)methyl)-4,11*b*-dimethyl-8-oxotetradecahydro-6*a*,9-methanocyclohepta[*a*]naphthalene-4-carboxylate (**34**)

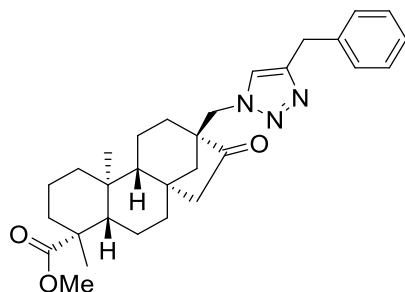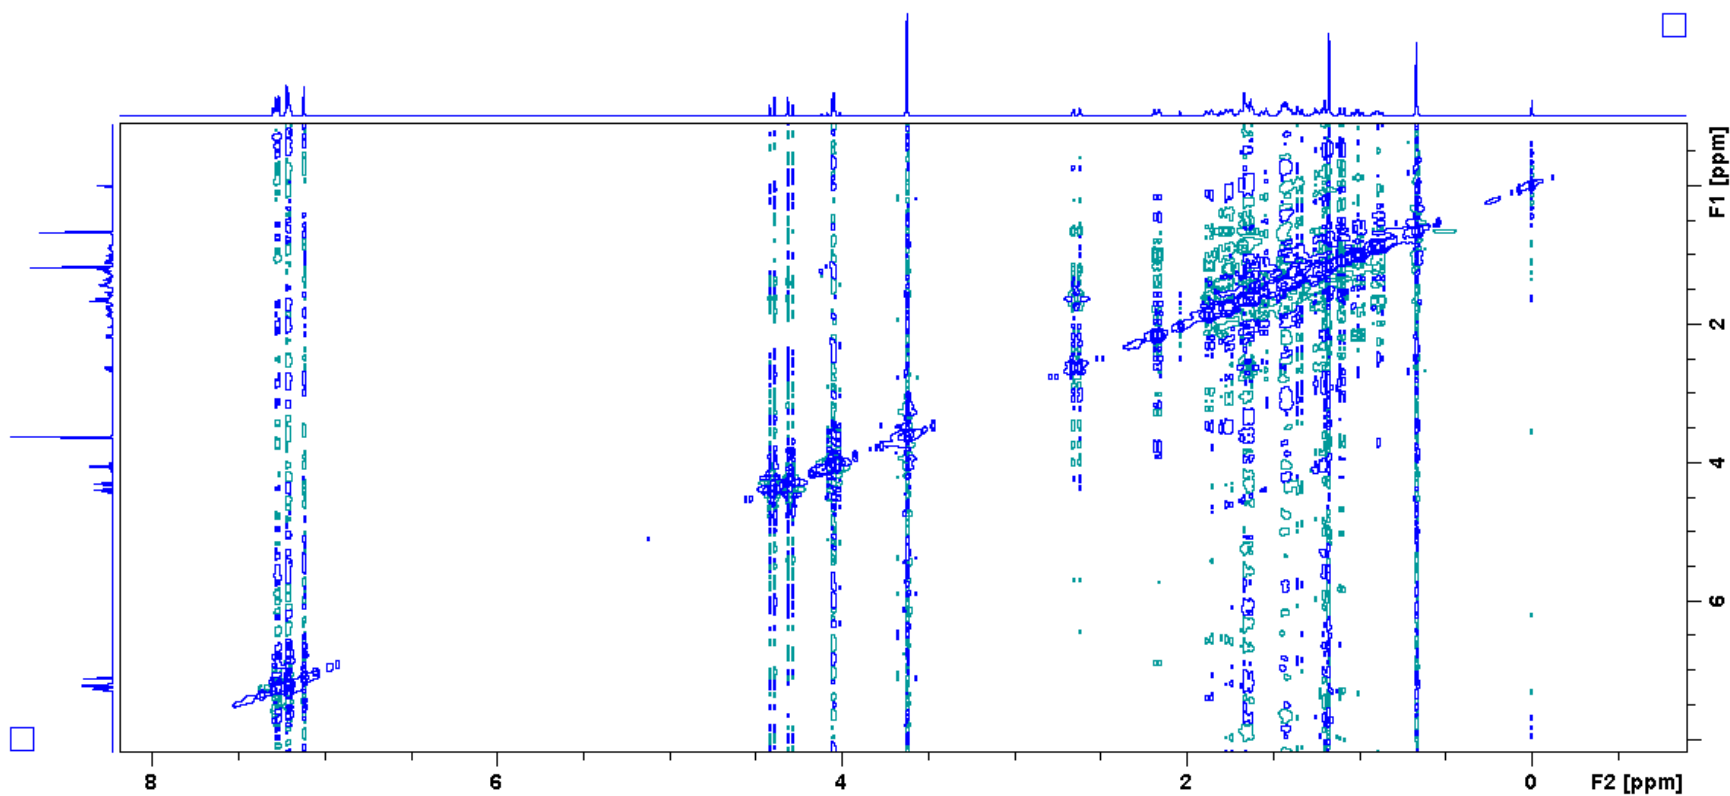

HSQC of compound (4*R*,4*aS*,6*aR*,9*S*,11*aR*,11*bS*)-methyl 9-((4-benzyl-1*H*-1,2,3-triazol-1-yl)methyl)-4,11*b*-dimethyl-8-oxotetradecahydro-6*a*,9-methanocyclohepta[*a*]naphthalene-4-carboxylate (**34**)

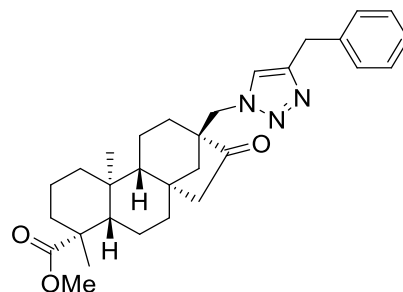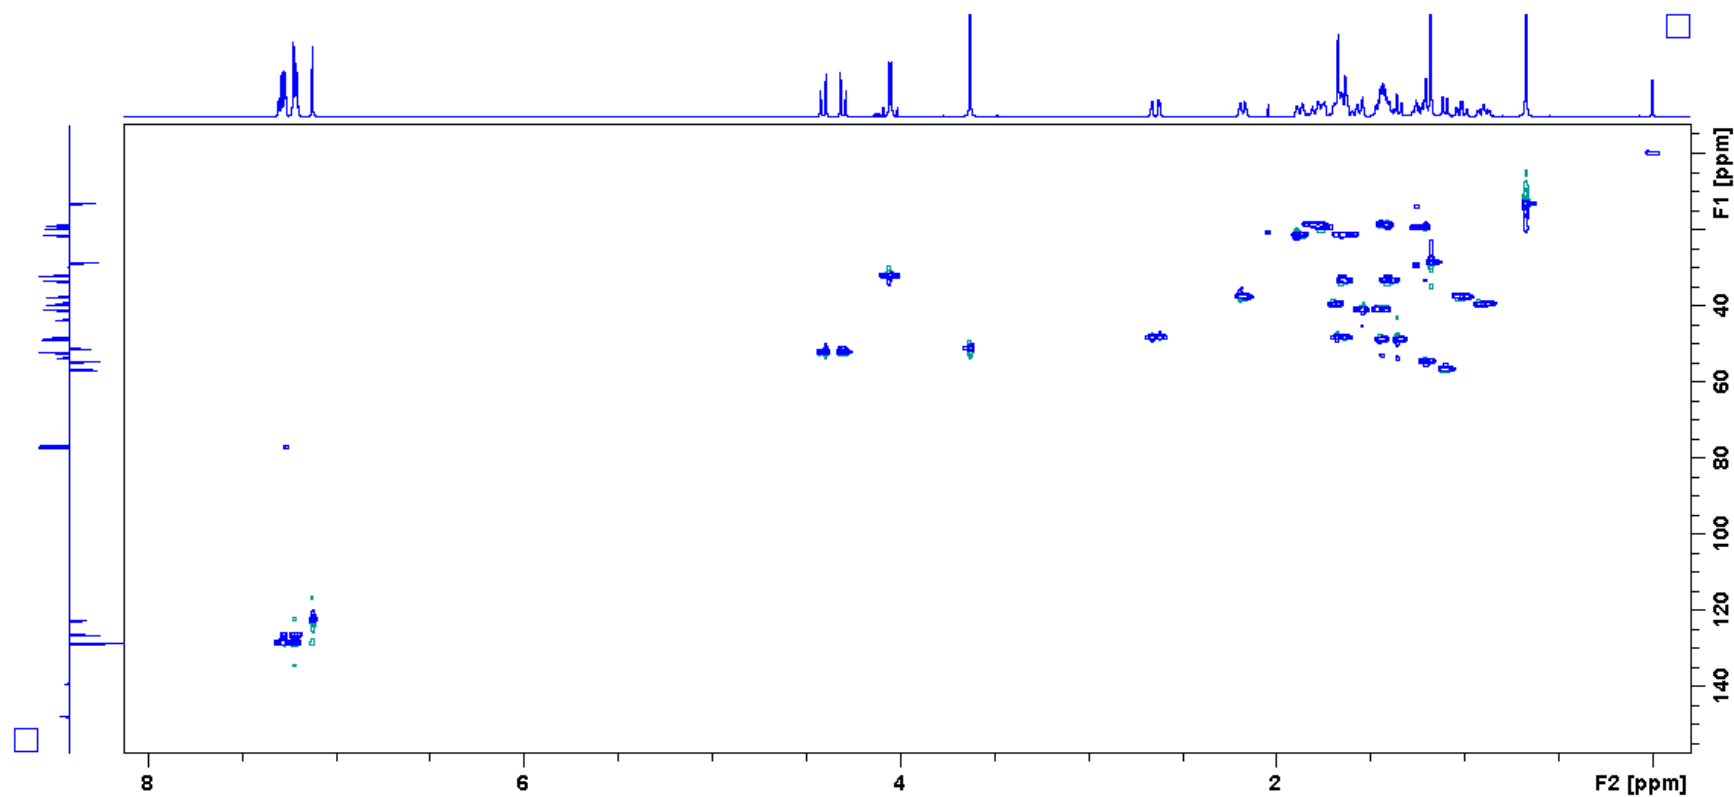

HMBC of compound (4*R*,4*aS*,6*aR*,9*S*,11*aR*,11*bS*)-methyl 9-((4-benzyl-1*H*-1,2,3-triazol-1-yl)methyl)-4,11*b*-dimethyl-8-oxotetradecahydro-6*a*,9-methanocyclohepta[*a*]naphthalene-4-carboxylate (**34**)

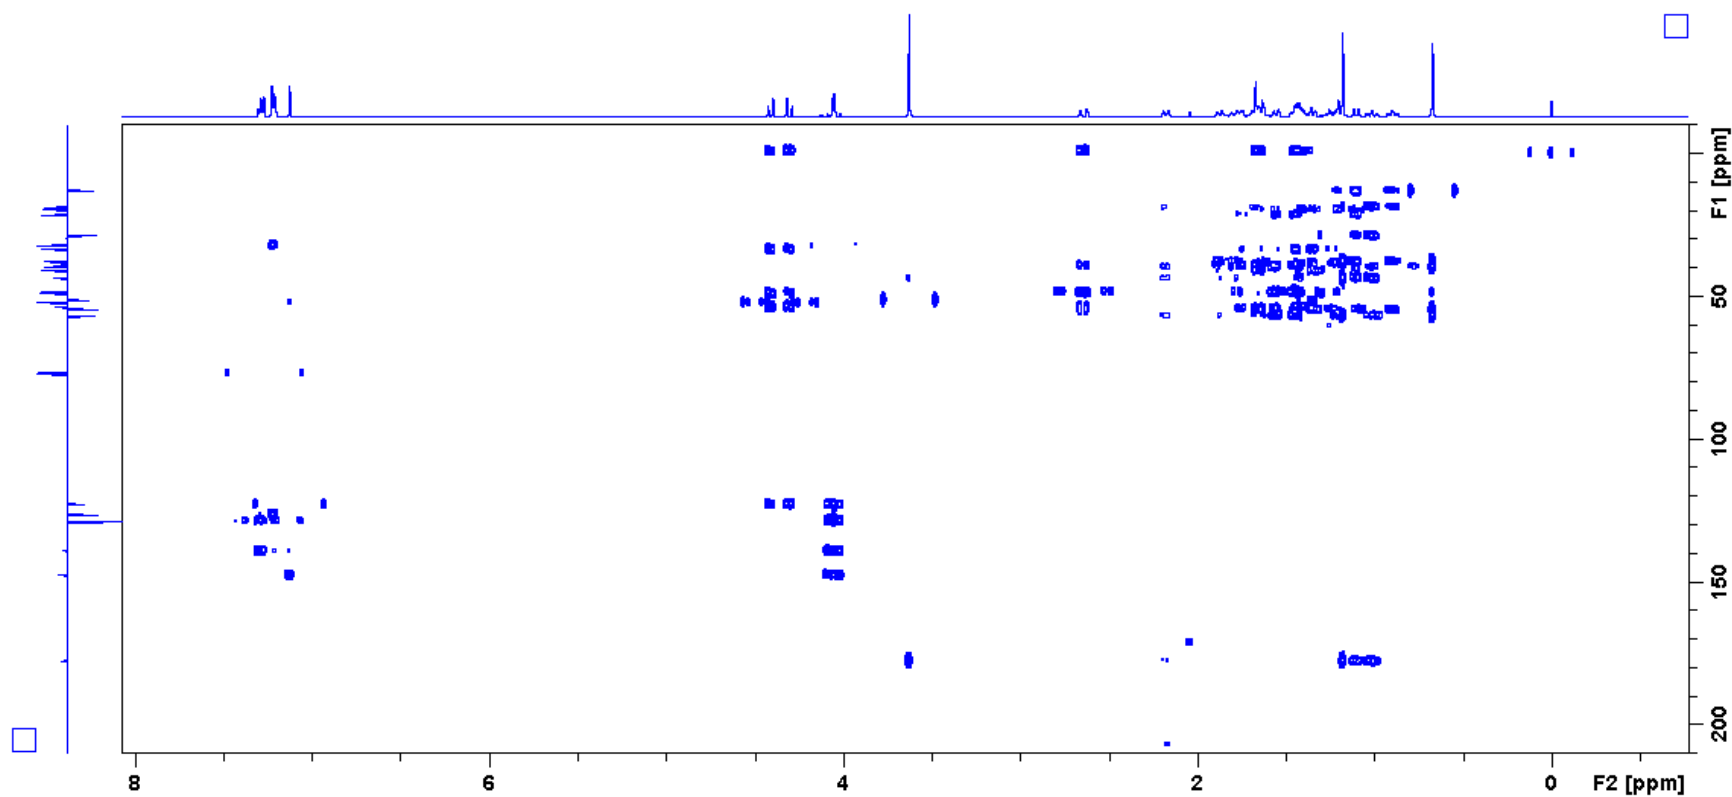

$^1\text{H}$ -NMR of compound (4*R*,4*aS*,6*aR*,8*R*,9*S*,11*aR*,11*bS*)-methyl 8-hydroxy-4,11*b*-dimethyl-9-((4-phenyl-1*H*-1,2,3-triazol-1-yl)methyl)tetradecahydro-6*a*,9-methanocyclohepta[*a*]naphthalene-4-carboxylate (**35**)

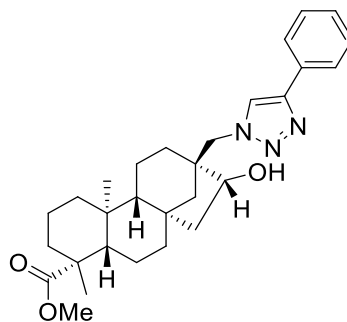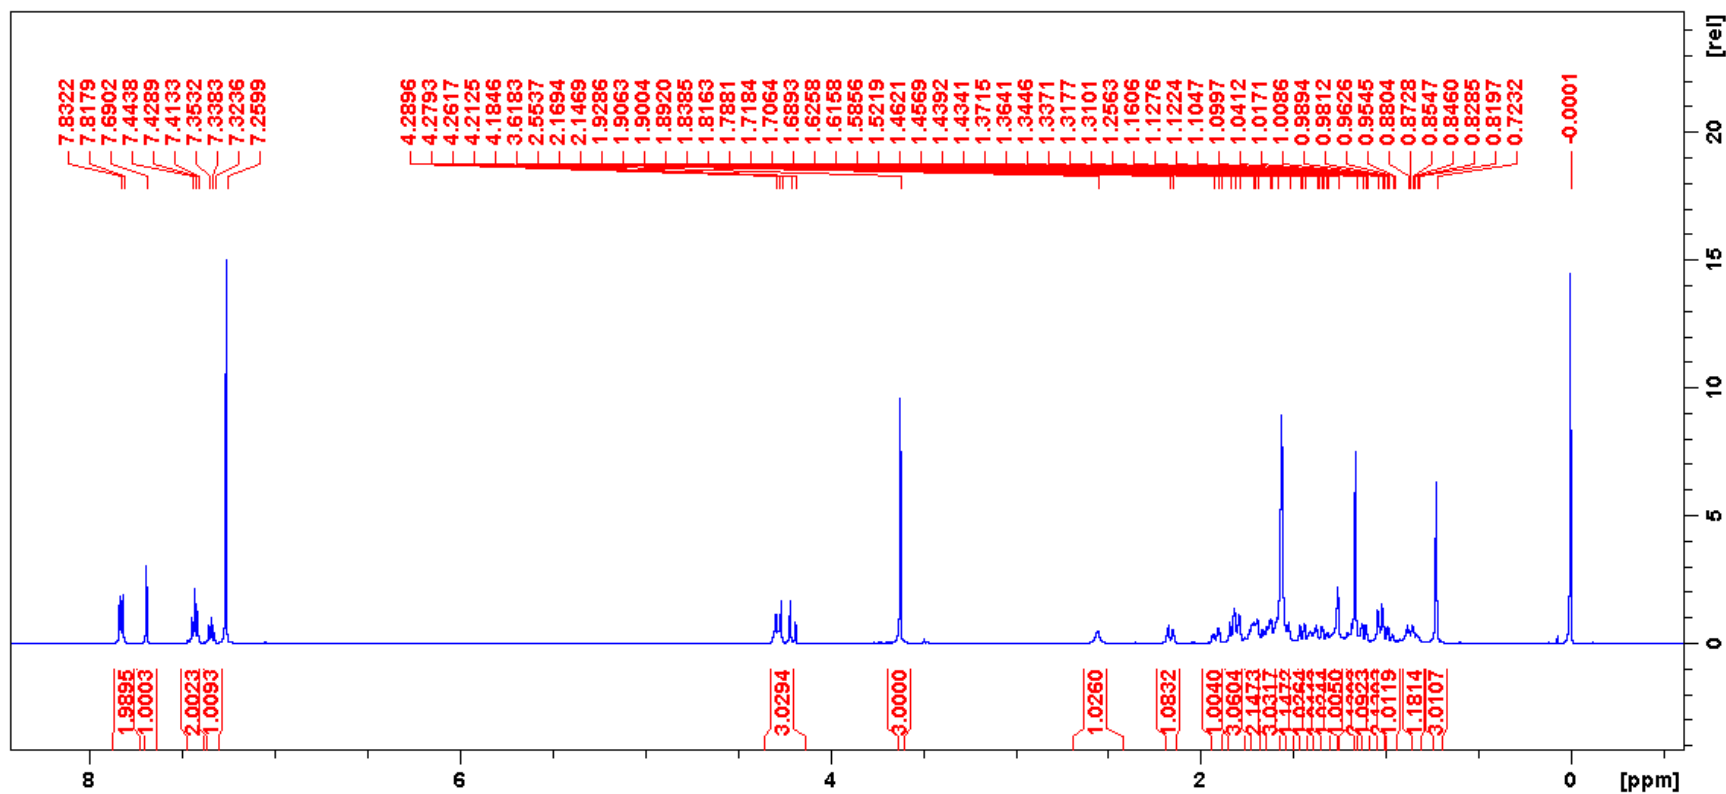

$^{13}\text{C}$ -NMR of compound (4*R*,4*aS*,6*aR*,8*R*,9*S*,11*aR*,11*bS*)-methyl 8-hydroxy-4,11*b*-dimethyl-9-((4-phenyl-1*H*-1,2,3-triazol-1-yl)methyl)tetradecahydro-6*a*,9-methanocyclohepta[*a*]naphthalene-4-carboxylate (**35**)

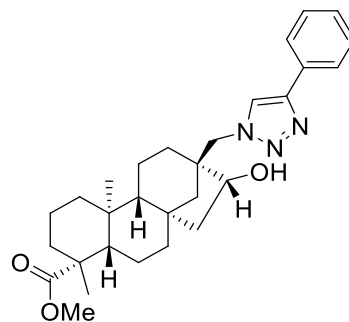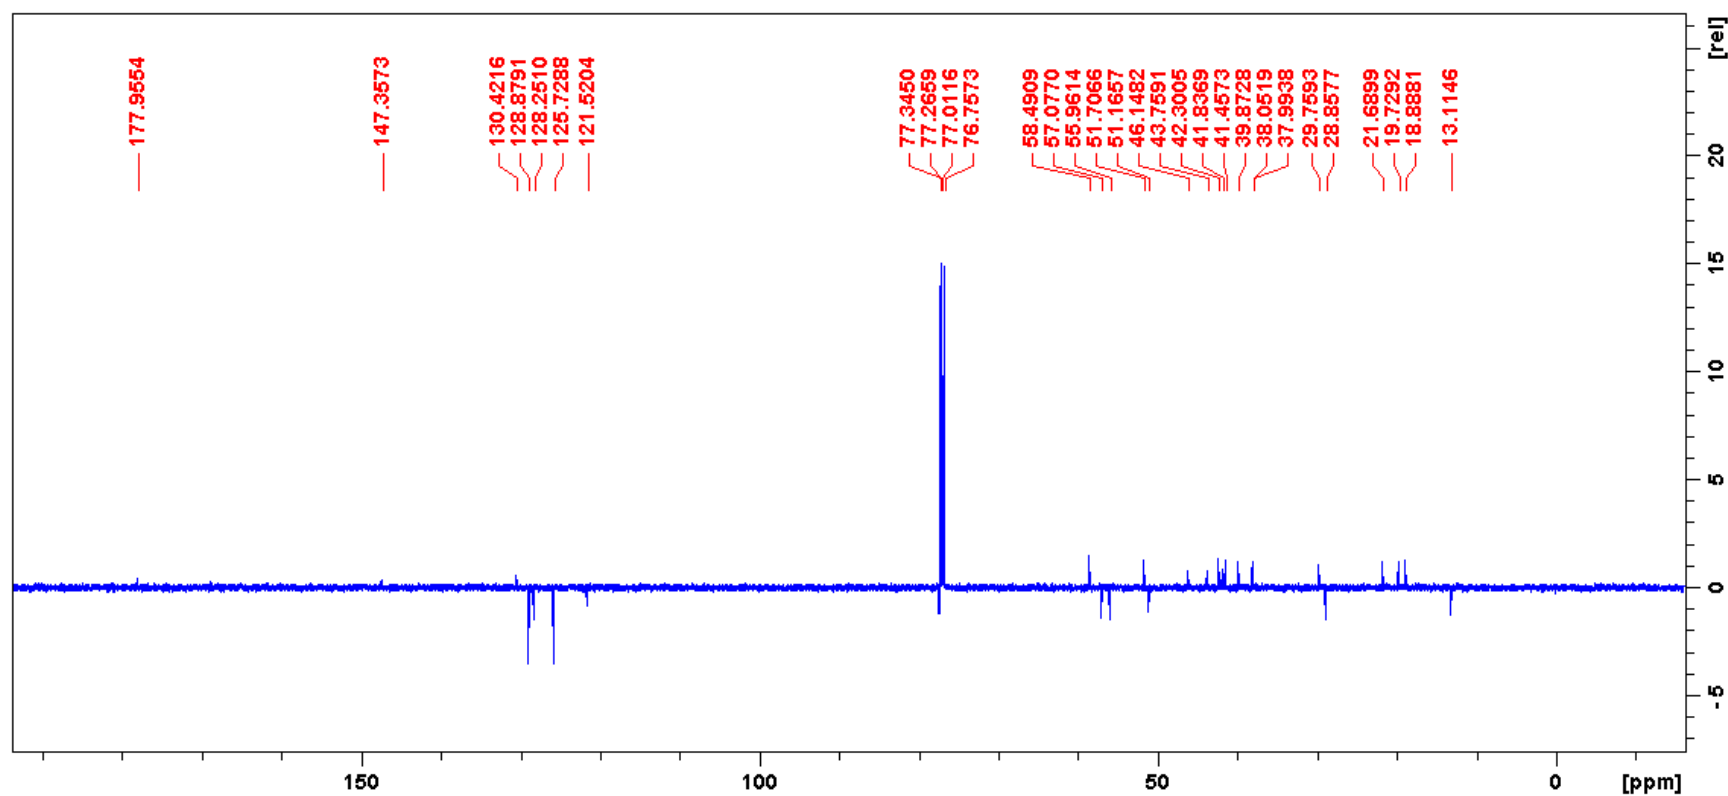

COSY of compound (4*R*,4*aS*,6*aR*,8*R*,9*S*,11*aR*,11*bS*)-methyl 8-hydroxy-4,11*b*-dimethyl-9-((4-phenyl-1*H*-1,2,3-triazol-1-yl)methyl)tetradecahydro-6*a*,9-methanocyclohepta[*a*]naphthalene-4-carboxylate (**35**)

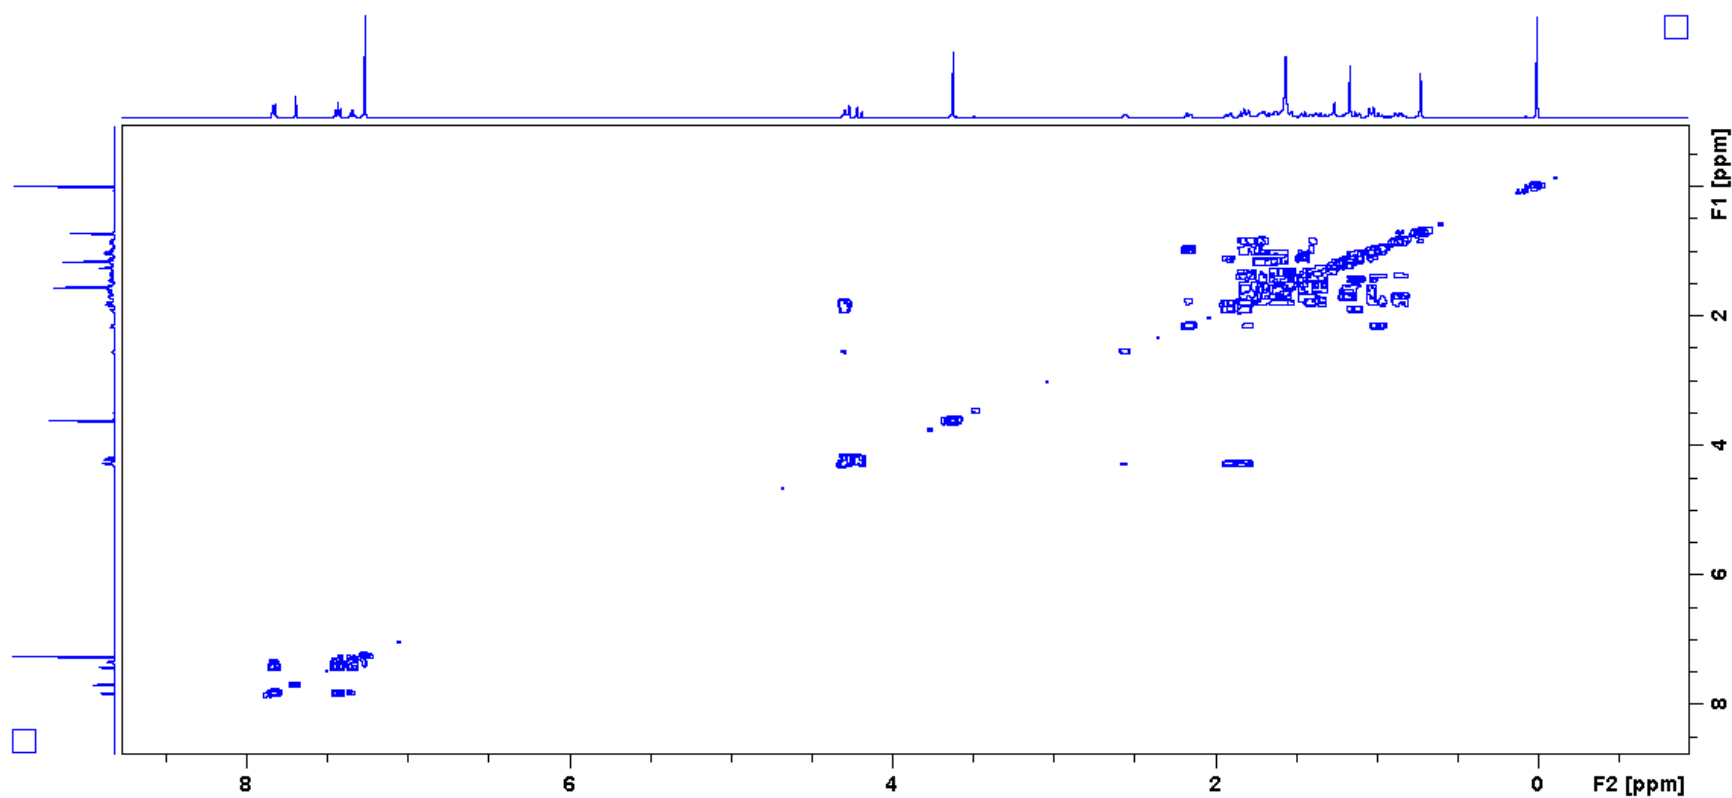



NOESY of compound (4*R*,4*aS*,6*aR*,8*R*,9*S*,11*aR*,11*bS*)-methyl 8-hydroxy-4,11b-dimethyl-9-((4-phenyl-1*H*-1,2,3-triazol-1-yl)methyl)tetradecahydro-6*a*,9-methanocyclohepta[*a*]naphthalene-4-carboxylate (**35**)

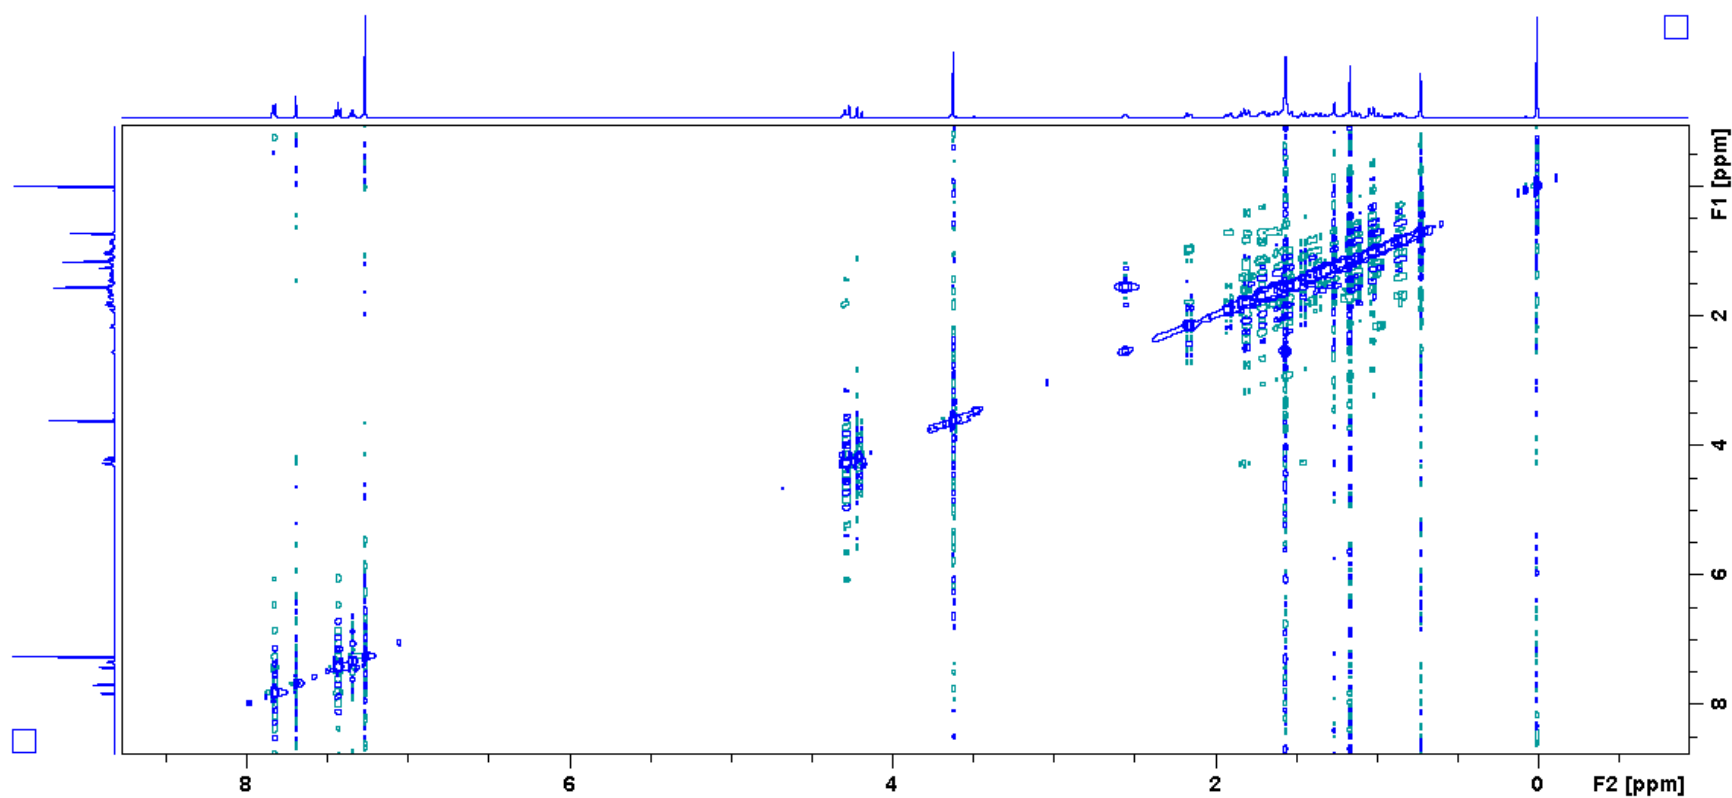

HSQC of compound (4*R*,4*aS*,6*aR*,8*R*,9*S*,11*aR*,11*bS*)-methyl 8-hydroxy-4,11*b*-dimethyl-9-((4-phenyl-1*H*-1,2,3-triazol-1-yl)methyl)tetradecahydro-6*a*,9-methanocyclohepta[*a*]naphthalene-4-carboxylate (**35**)

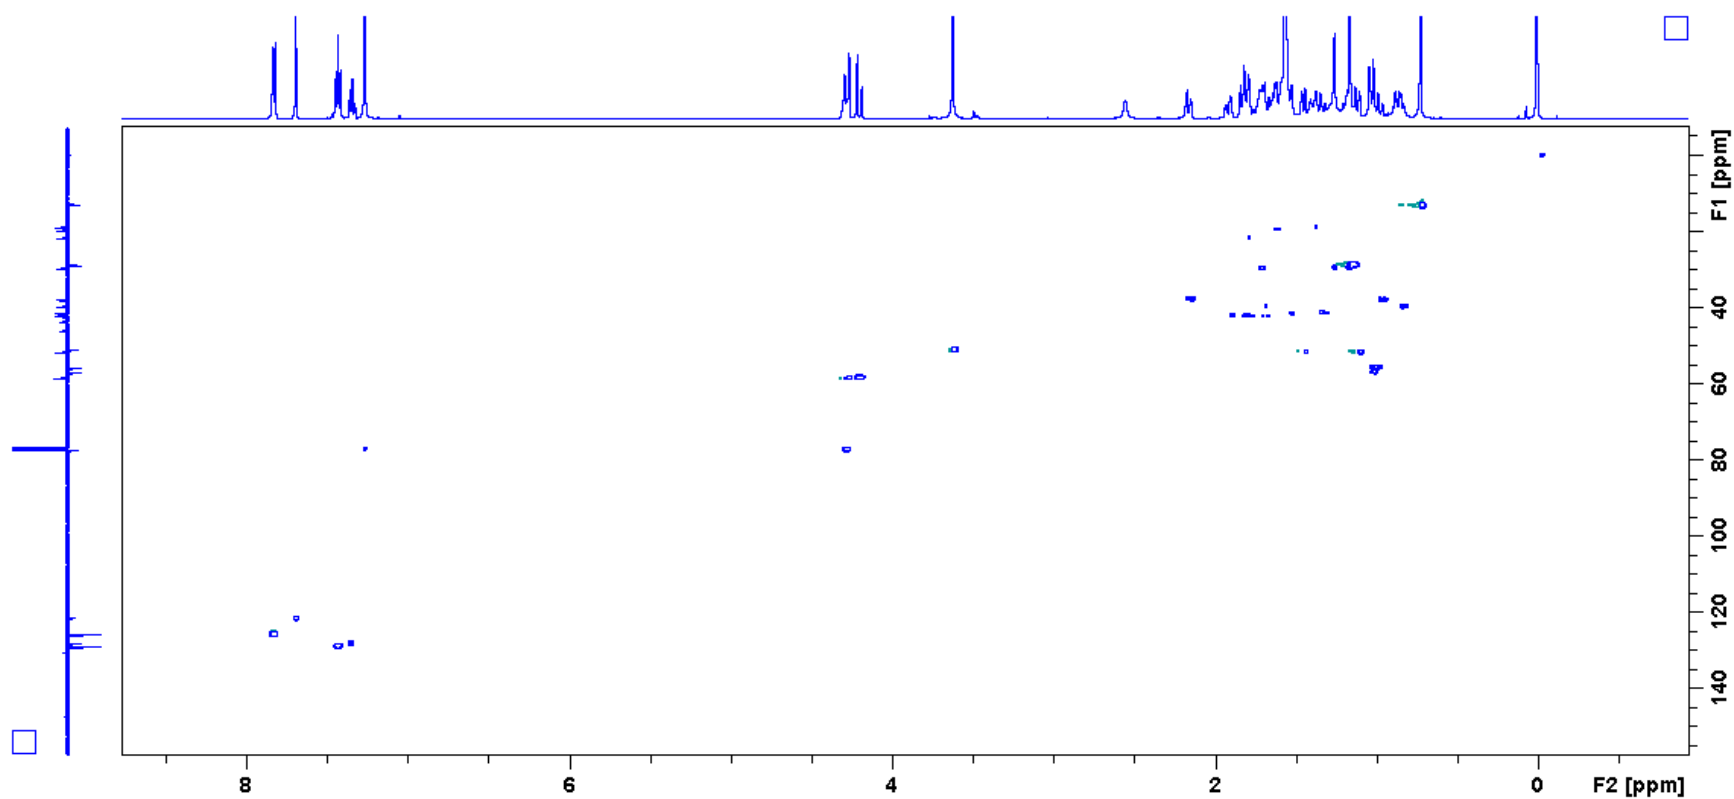

HMBC of compound (4*R*,4*aS*,6*aR*,8*R*,9*S*,11*aR*,11*bS*)-methyl 8-hydroxy-4,11*b*-dimethyl-9-((4-phenyl-1*H*-1,2,3-triazol-1-yl)methyl)tetradecahydro-6*a*,9-methanocyclohepta[*a*]naphthalene-4-carboxylate (**35**)

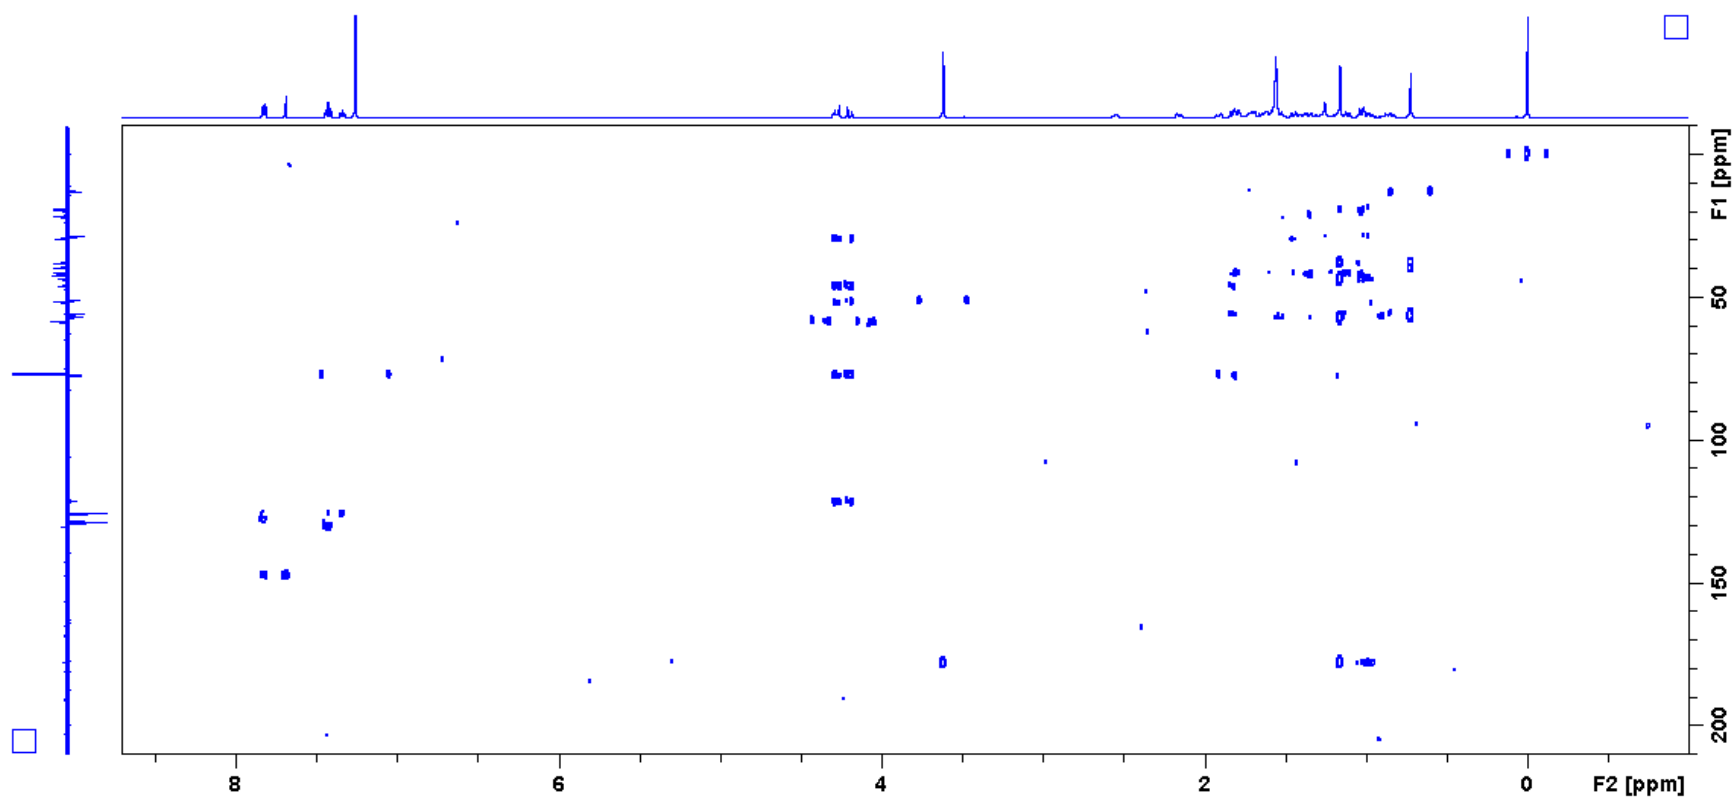

$^1\text{H}$ -NMR of compound (4*R*,4*aS*,6*aR*,8*R*,9*S*,11*aR*,11*bS*)-methyl 9-((4-benzyl-1*H*-1,2,3-triazol-1-yl)methyl)-8-hydroxy-4,11*b*-dimethyltetradecahydro-6*a*,9-methanocyclohepta[*a*]naphthalene-4-carboxylate (**36**)

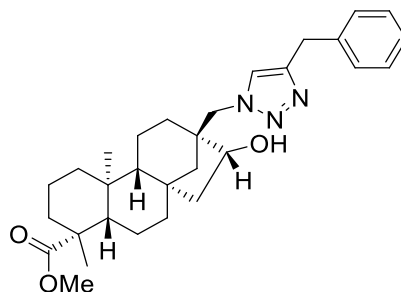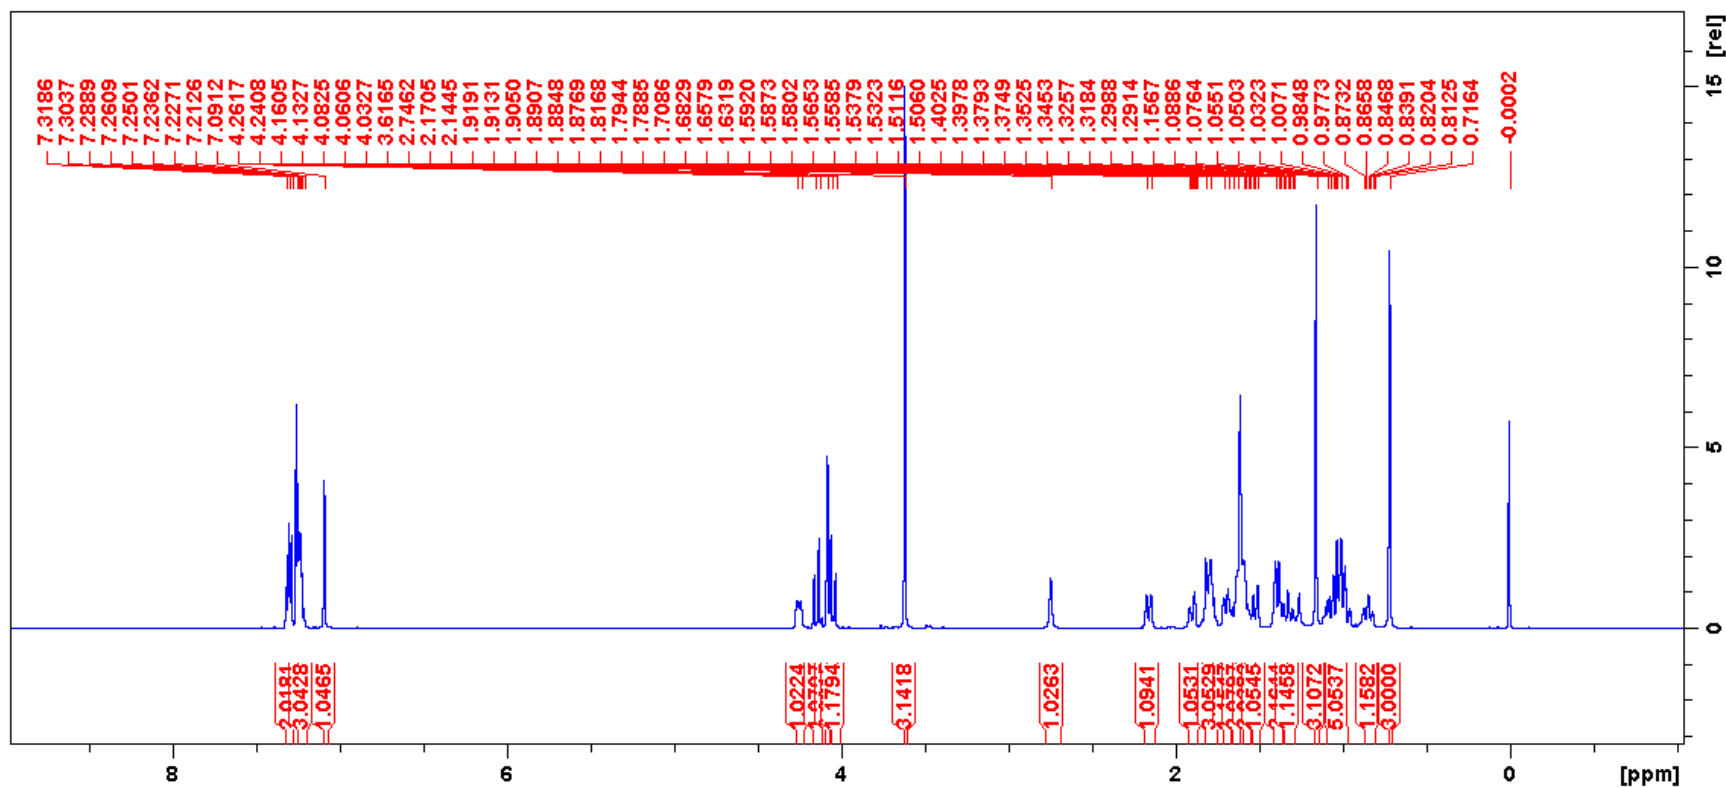

$^{13}\text{C}$ -NMR of compound (4*R*,4*aS*,6*aR*,8*R*,9*S*,11*aR*,11*bS*)-methyl 9-((4-benzyl-1*H*-1,2,3-triazol-1-yl)methyl)-8-hydroxy-4,11*b*-dimethyltetradecahydro-6*a*,9-methanocyclohepta[*a*]naphthalene-4-carboxylate (**36**)

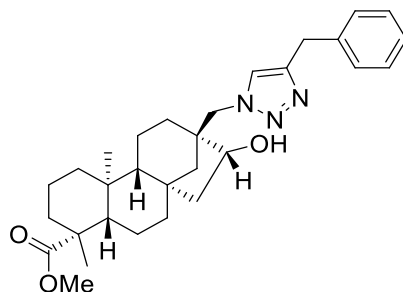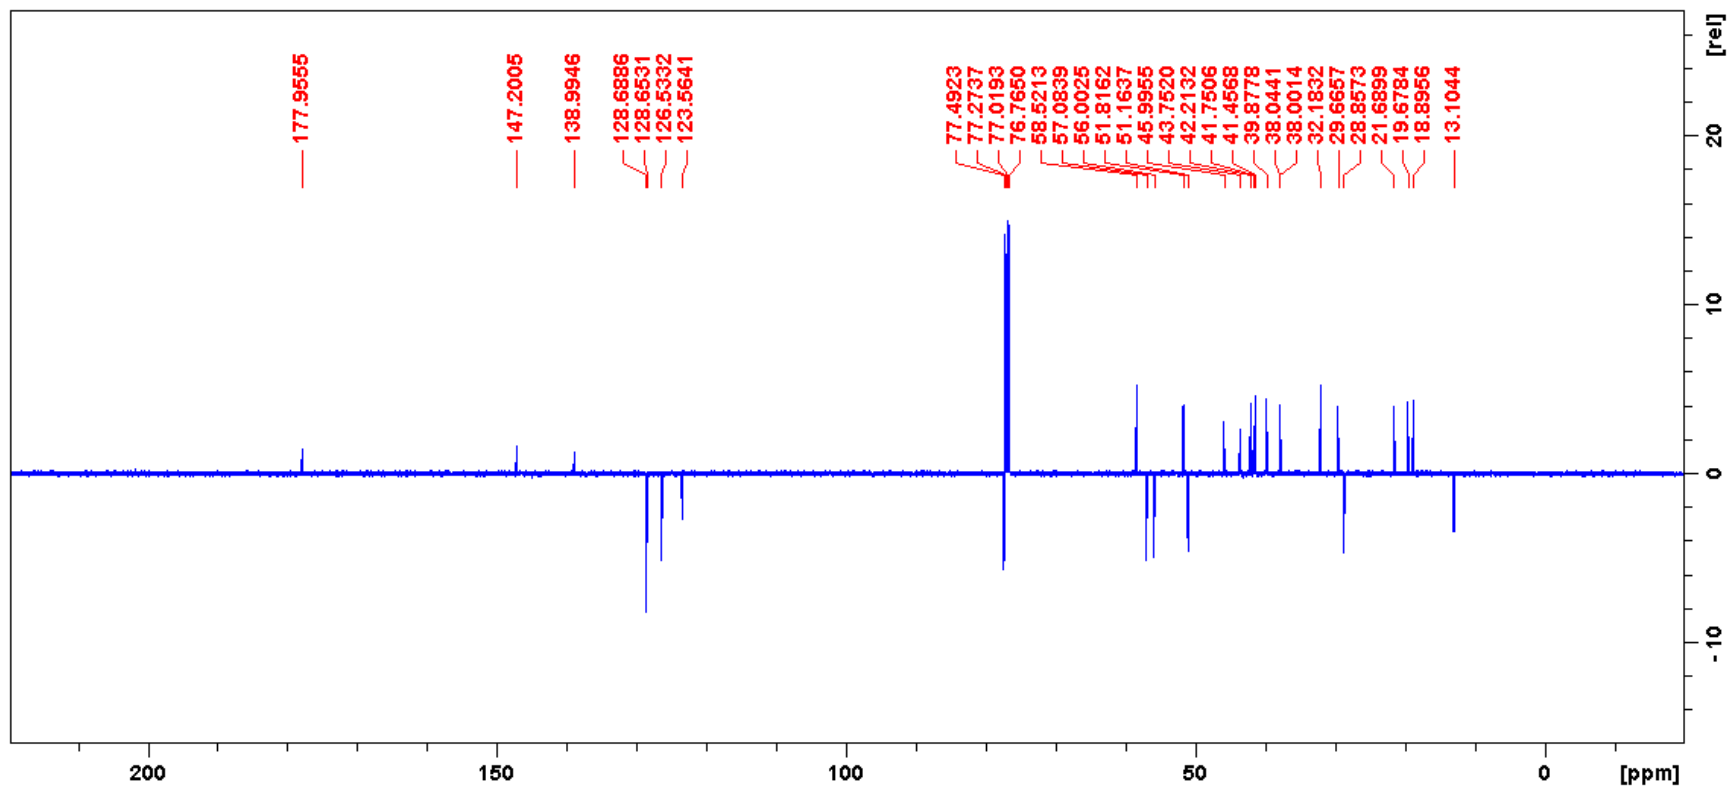

COSY of compound (4*R*,4*aS*,6*aR*,8*R*,9*S*,11*aR*,11*bS*)-methyl 9-((4-benzyl-1*H*-1,2,3-triazol-1-yl)methyl)-8-hydroxy-4,11*b*-dimethyltetradecahydro-6*a*,9-methanocyclohepta[*a*]naphthalene-4-carboxylate (**36**)

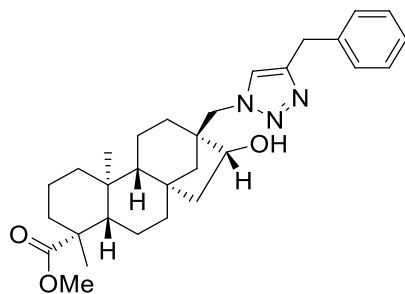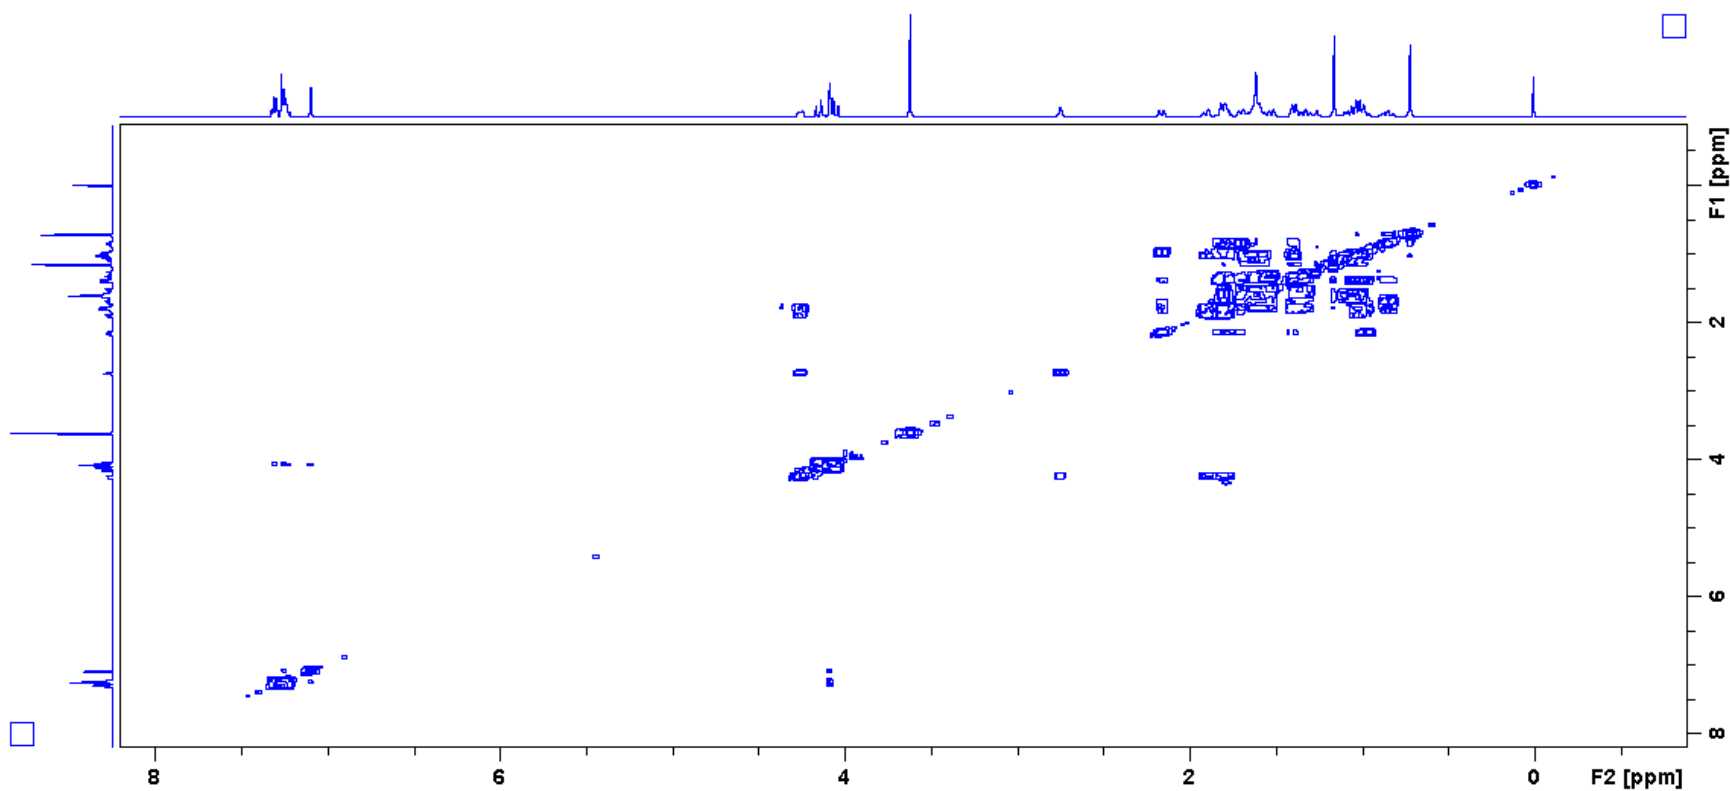

NOESY of compound (4*R*,4*aS*,6*aR*,8*R*,9*S*,11*aR*,11*bS*)-methyl 9-((4-benzyl-1*H*-1,2,3-triazol-1-yl)methyl)-8-hydroxy-4,11*b*-dimethyltetradecahydro-6*a*,9-methanocyclohepta[*a*]naphthalene-4-carboxylate (**36**)

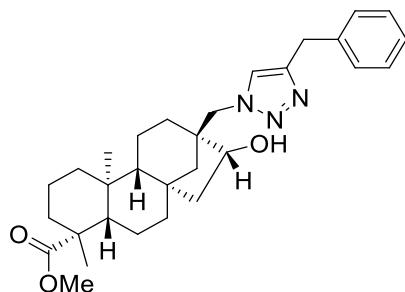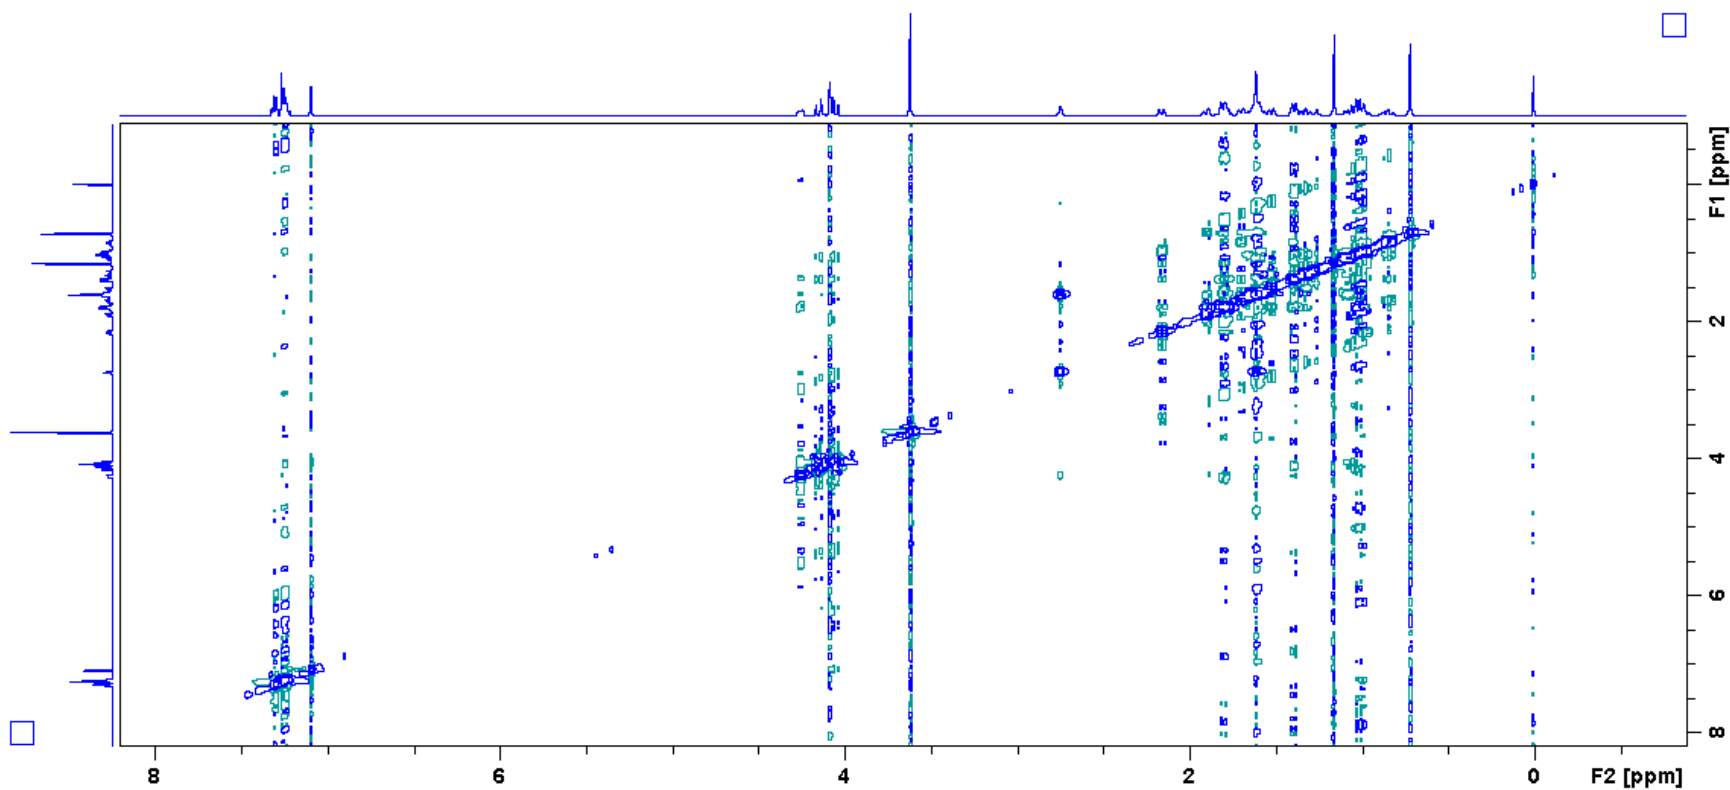

HSQC of compound (4*R*,4*aS*,6*aR*,8*R*,9*S*,11*aR*,11*bS*)-methyl 9-((4-benzyl-1*H*-1,2,3-triazol-1-yl)methyl)-8-hydroxy-4,11b-dimethyltetradecahydro-6*a*,9-methanocyclohepta[*a*]naphthalene-4-carboxylate (**36**)

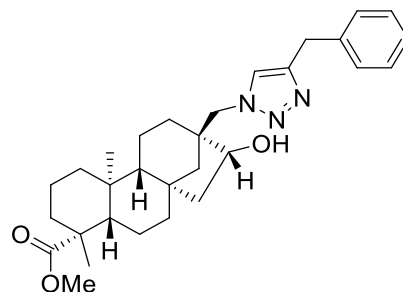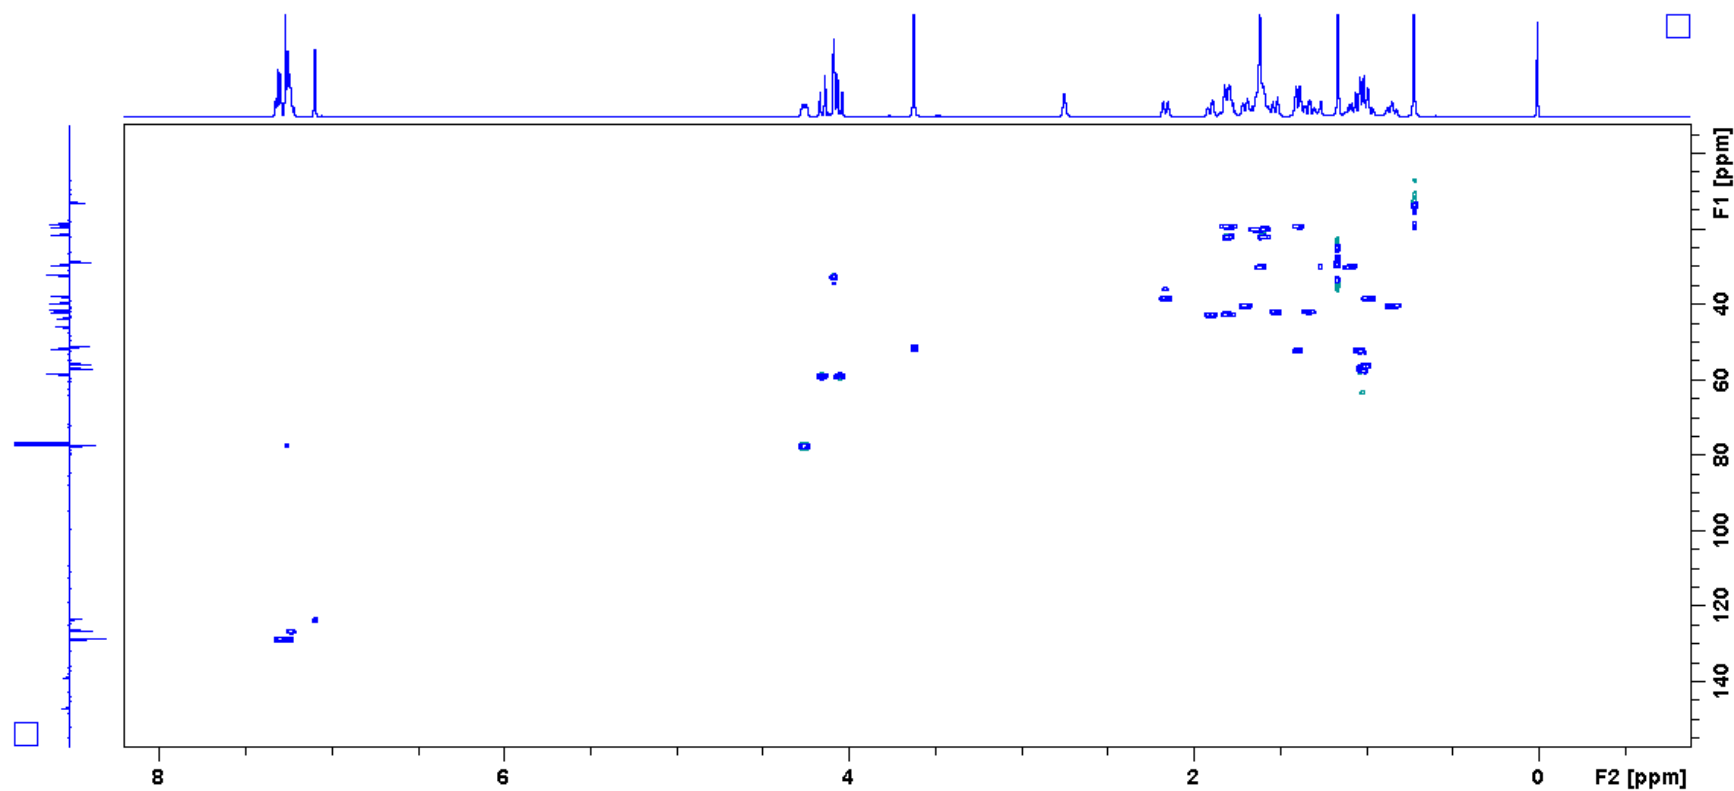



HMBC of compound (4*R*,4*aS*,6*aR*,8*R*,9*S*,11*aR*,11*bS*)-methyl 9-((4-benzyl-1*H*-1,2,3-triazol-1-yl)methyl)-8-hydroxy-4,11*b*-dimethyltetradecahydro-6*a*,9-methanocyclohepta[*a*]naphthalene-4-carboxylate (**36**)

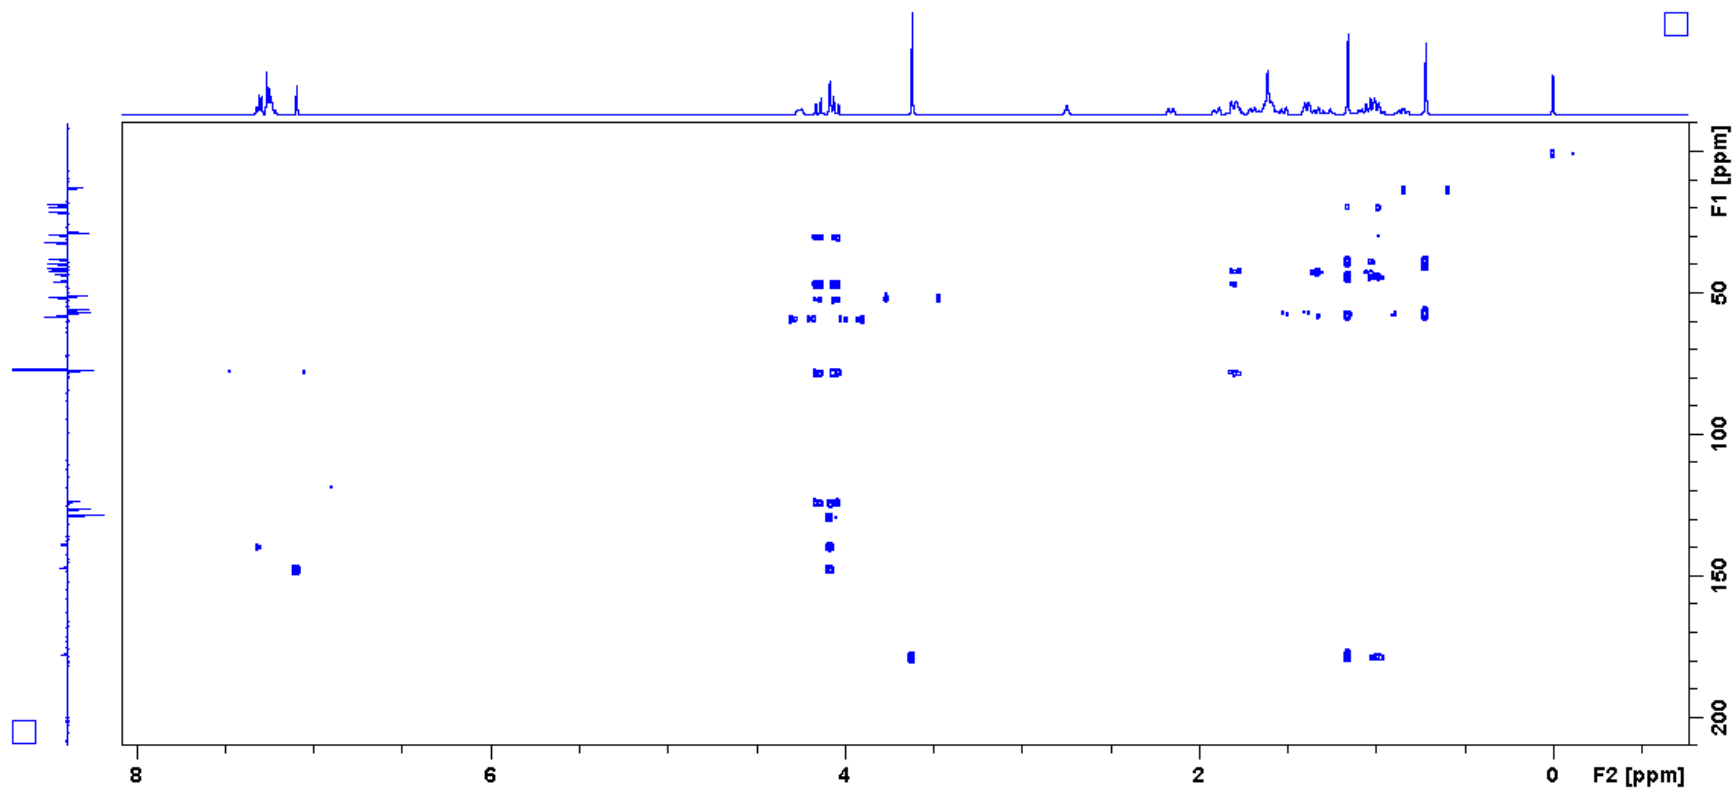

HRMS of compound (2'S,4R,4aS,6aS,11aR,11bS)-methyl 9-hydroxy-4,11b-dimethyldodecahydro-1H-spiro[6a,9-methanocyclohepta[a]naphthalene-8,2'-oxirane]-4-carboxylate (**3**)

D:\DATA\...\Robi\20230927\GYK-20230927-1  
D3-tol

09/27/23 16:24:56

GYK-20230927-1 #33426-33468 RT: 74.20-74.30 AV: 43 NL: 1.88E7

T: FTMS + p ESI Full ms [200.0000-1200.0000]

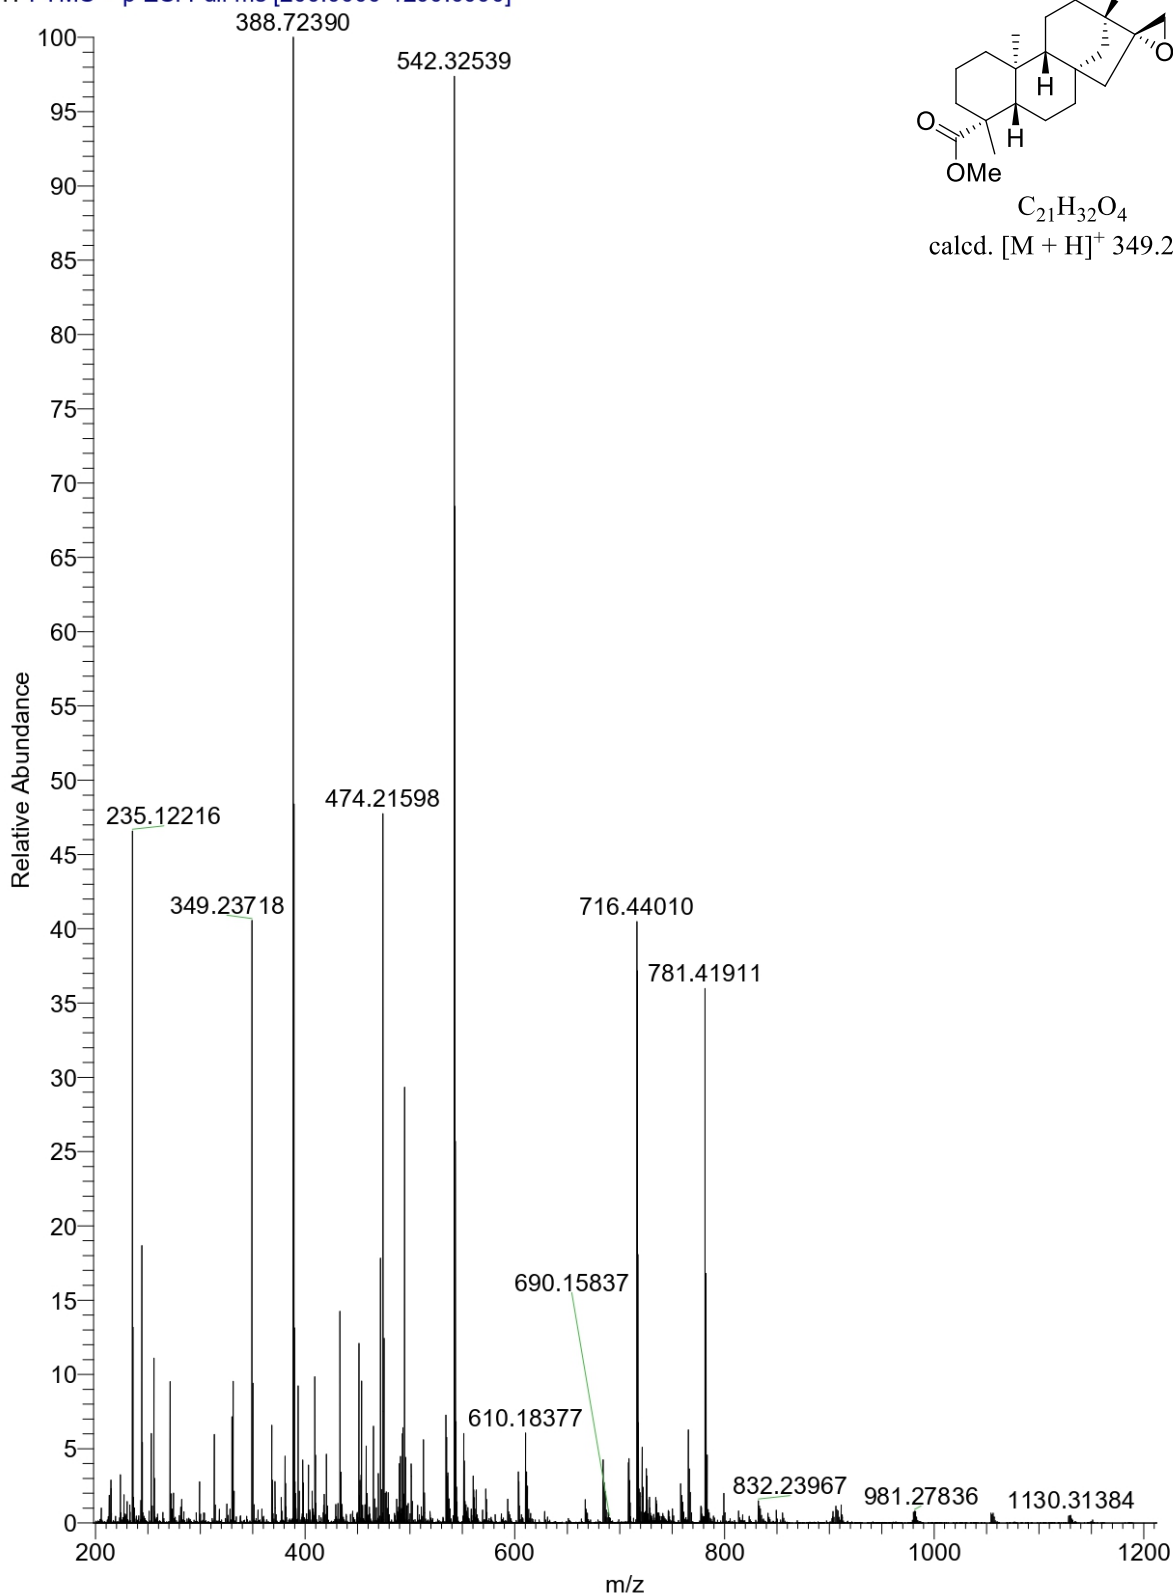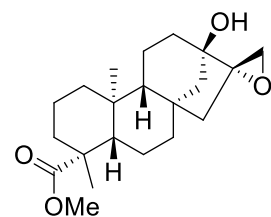

$C_{21}H_{32}O_4$

calcd.  $[M + H]^+$  349.2373

HRMS of compound (4*R*,4*aS*,6*aR*,9*S*,11*aR*,11*bS*)-methyl 9-(hydroxymethyl)-4,11*b*-dimethyl-8-oxotetradecahydro-6*a*,9-methanocyclohepta[*a*]naphthalene-4-carboxylate (**4**)

D:\DATA\...Robi\20230927\GYK-20230927-1  
D3-tol

09/27/23 16:24:56

GYK-20230927-1 #34157-34205 RT: 75.83-75.93 AV: 49 NL: 9.18E6

T: FTMS + p ESI Full ms [200.0000-1200.0000]

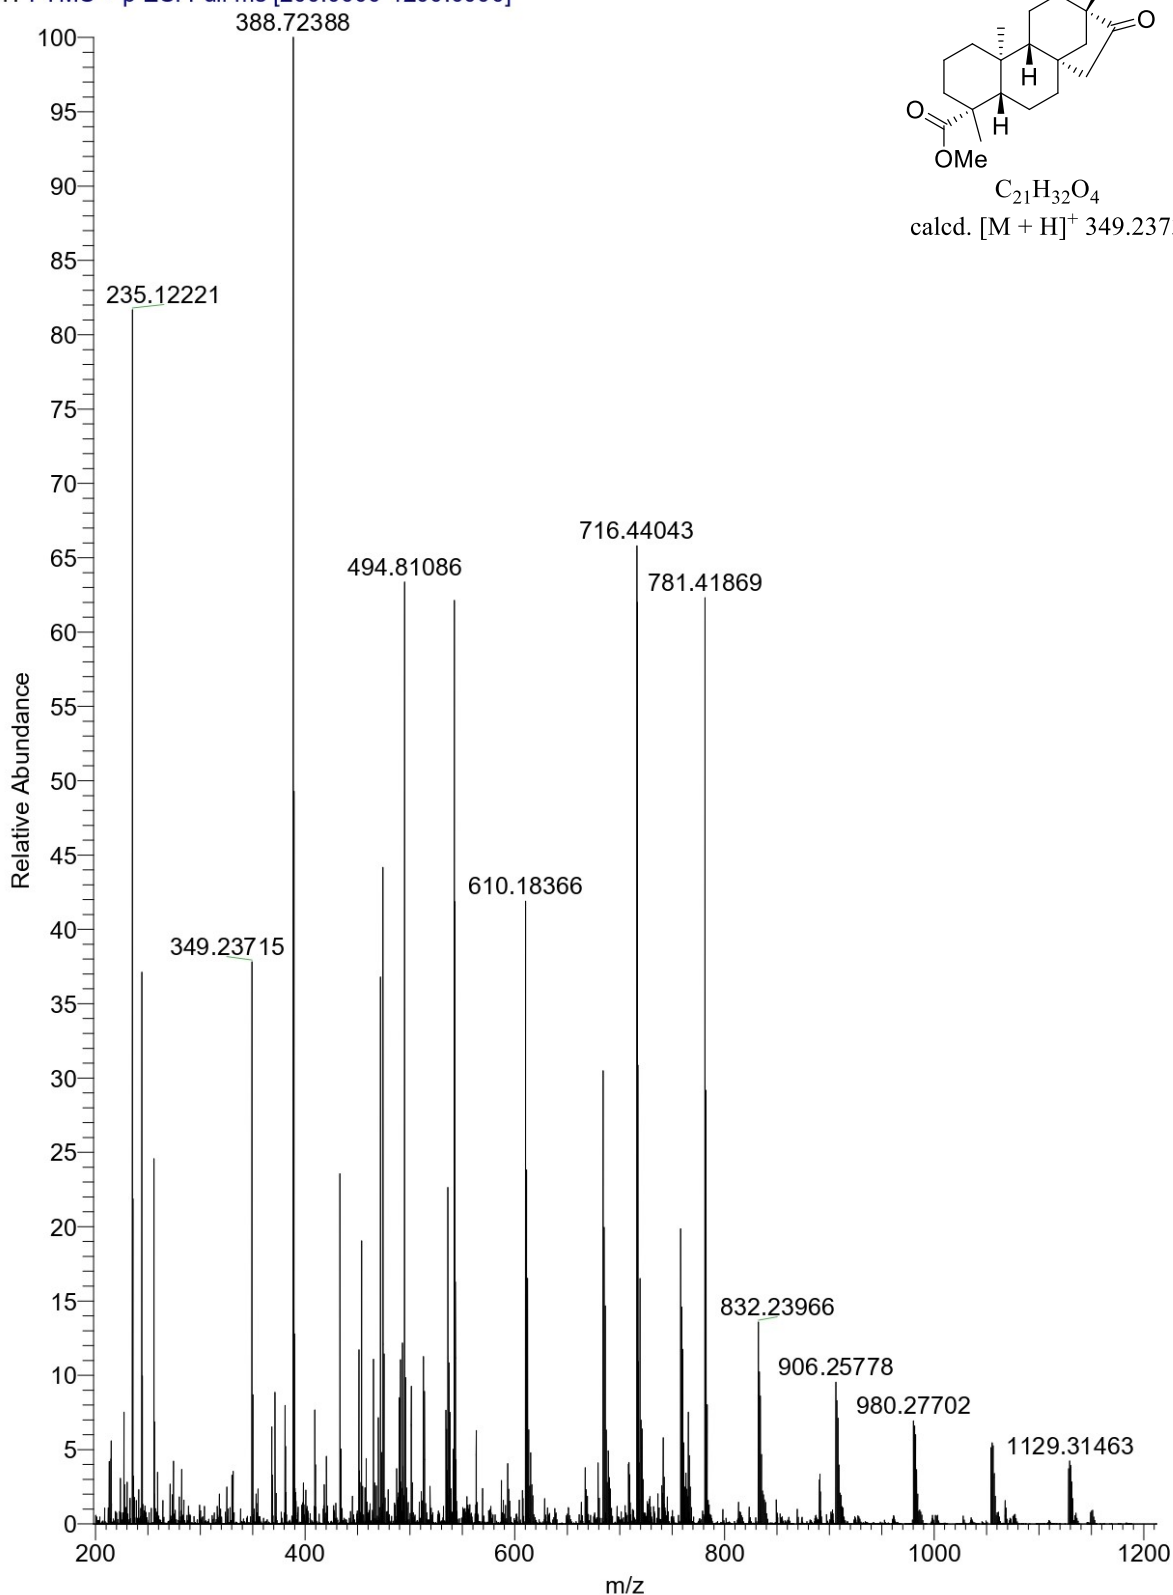

HRMS of compound (4*R*,4*aS*,6*aR*,9*R*,11*aR*,11*bS*,*E*)-methyl 8-(hydroxyimino)-9-(hydroxymethyl)-4,11*b*-dimethyltetradecahydro-6*a*,9-methanocyclohepta[*a*]naphthalene-4-carboxylate (**5**)

D:\DATA\...\Robi\20230927\GYK-20230927-1  
D3-tol

09/27/23 16:24:56

GYK-20230927-1 #34900-34948 RT: 77.48-77.58 AV: 49 NL: 3.55E8

T: FTMS + p ESI Full ms [200.0000-1200.0000]

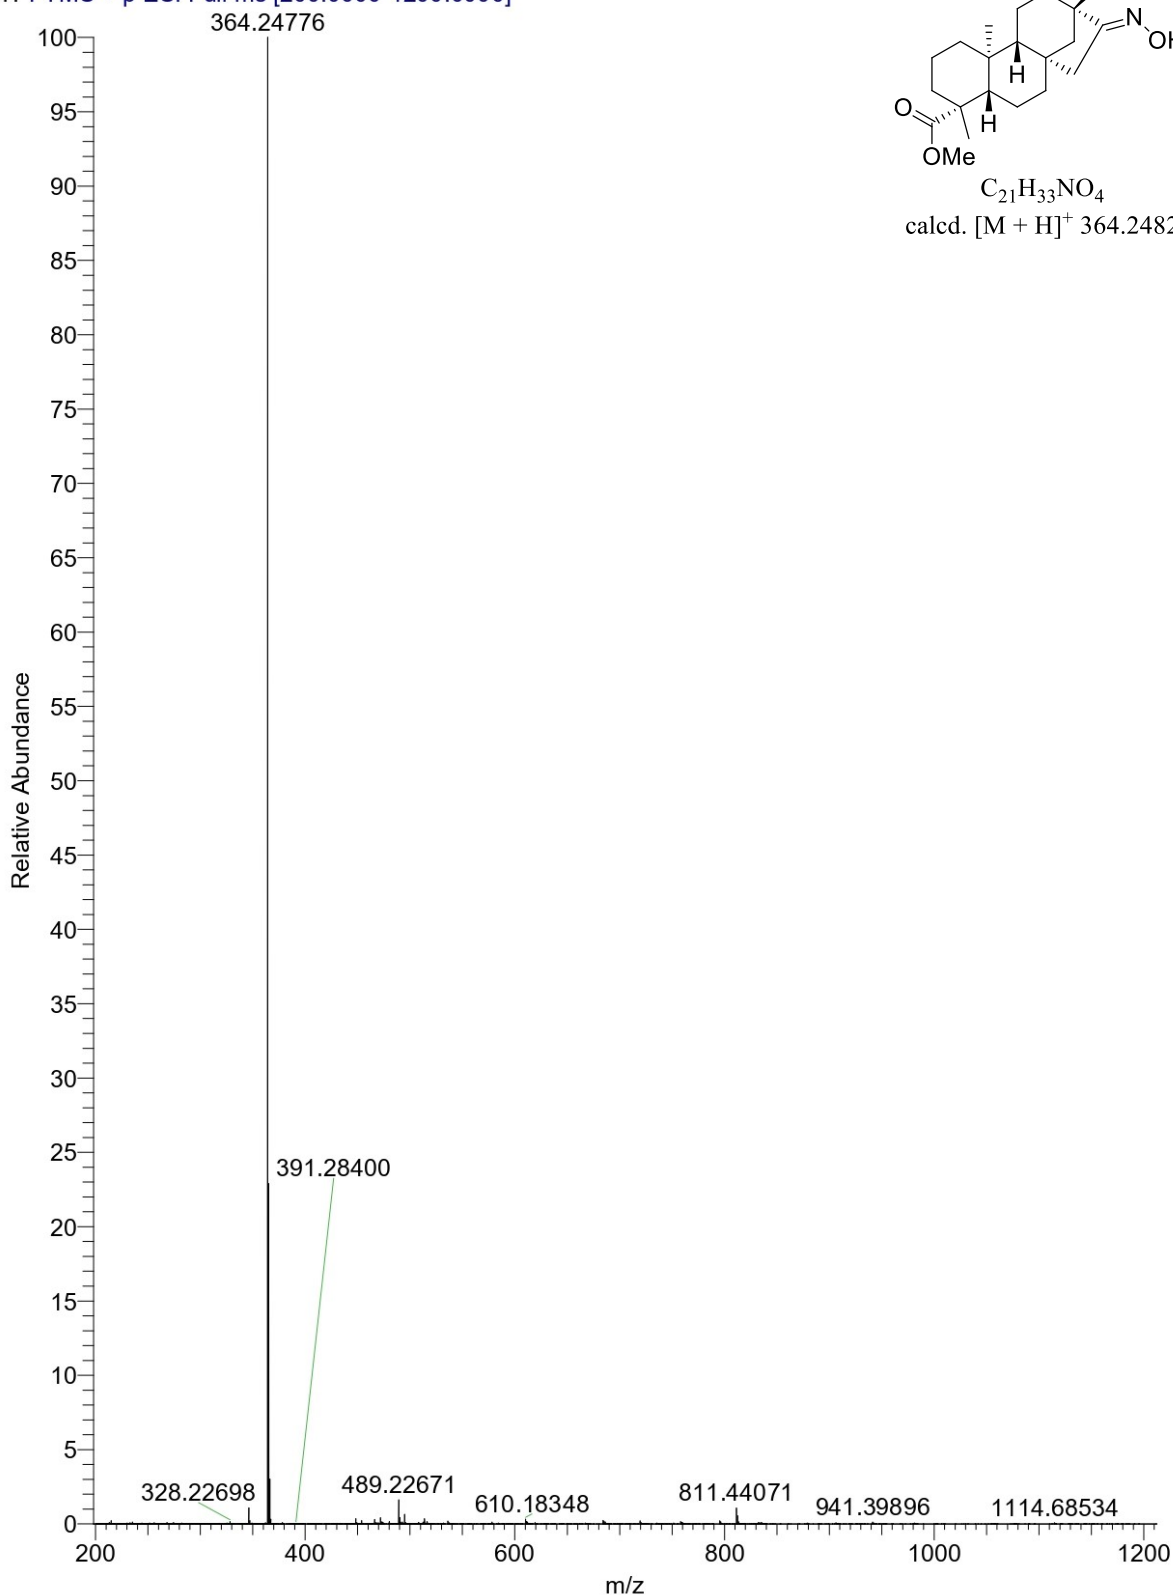

HRMS of compound (4*R*,4*aS*,6*aR*,8*R*,9*R*,11*aR*,11*bS*)-methyl 8-amino-9-(hydroxymethyl)-4,11b-dimethyltetradecahydro-6*a*,9-methanocyclohepta[*a*]naphthalene-4-carboxylate (**6**)

D:\DATAExp\...\20231103\GYK-20230927

11/03/23 11:26:54

FR, HG, HM

GYK-20230927 #761-799 RT: 1.69-1.77 AV: 39 NL: 2.23E9

T: FTMS + p ESI Full ms [200.0000-1200.0000]

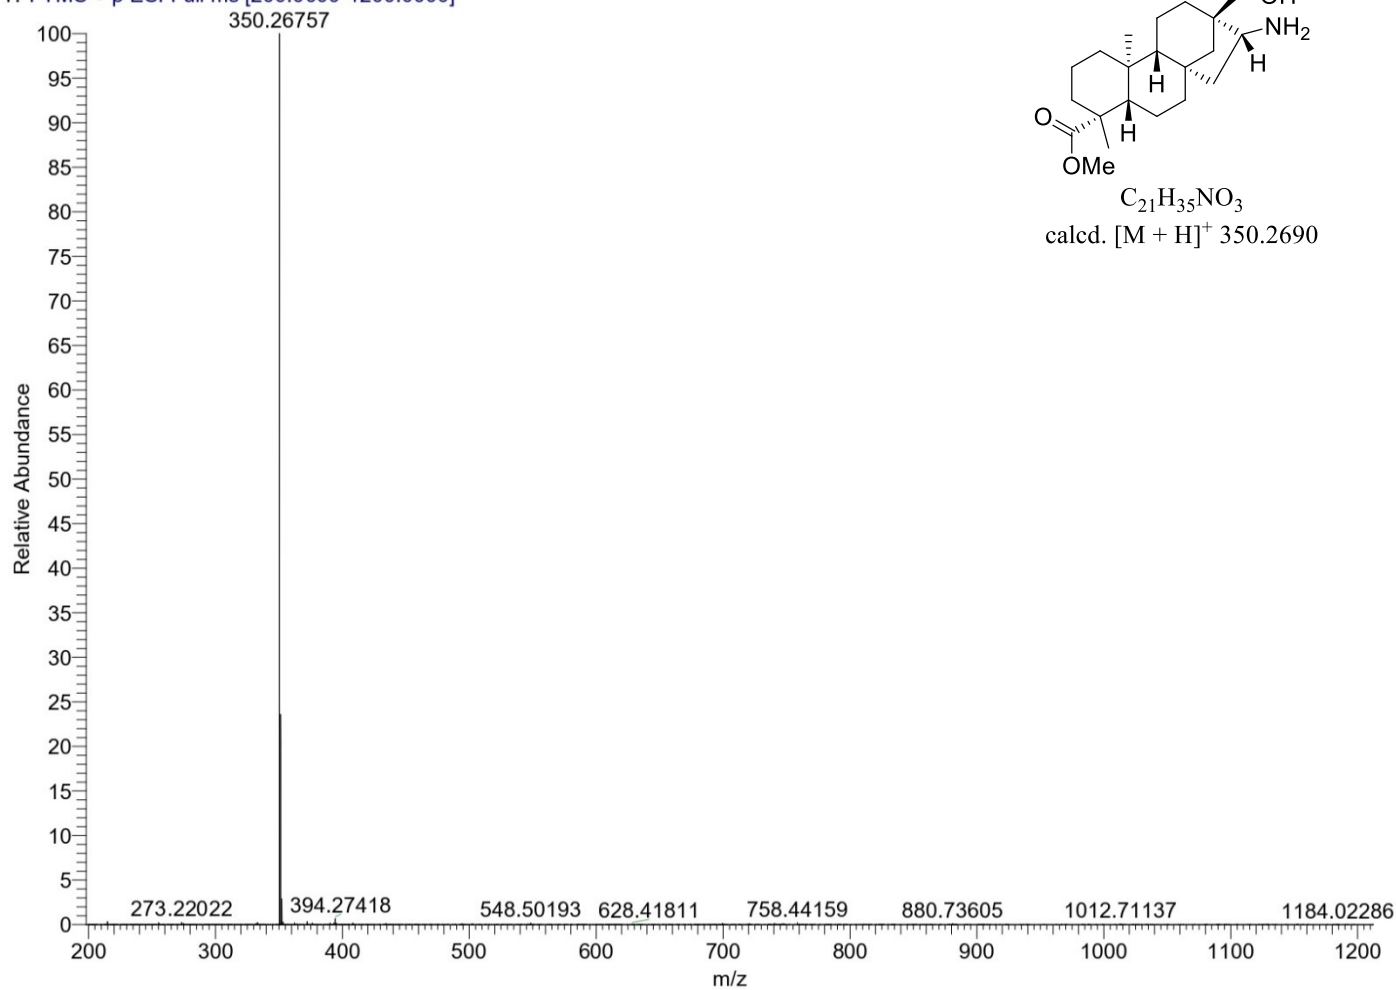

HRMS of compound (4*R*,4*aS*,6*aR*,8*S*,9*R*,11*aR*,11*bS*)-methyl 8-amino-9-(hydroxymethyl)-4,11*b*-dimethyltetradecahydro-6*a*,9-methanocyclohepta[*a*]naphthalene-4-carboxylate (**7**)

D:\DATAExp\...\20231103\GYK-20230927  
FR, HG, HM

11/03/23 11:26:54

GYK-20230927 #1527-1552 RT: 3.39-3.44 AV: 26 NL: 2.05E9

T: FTMS + p ESI Full ms [200.0000-1200.0000]

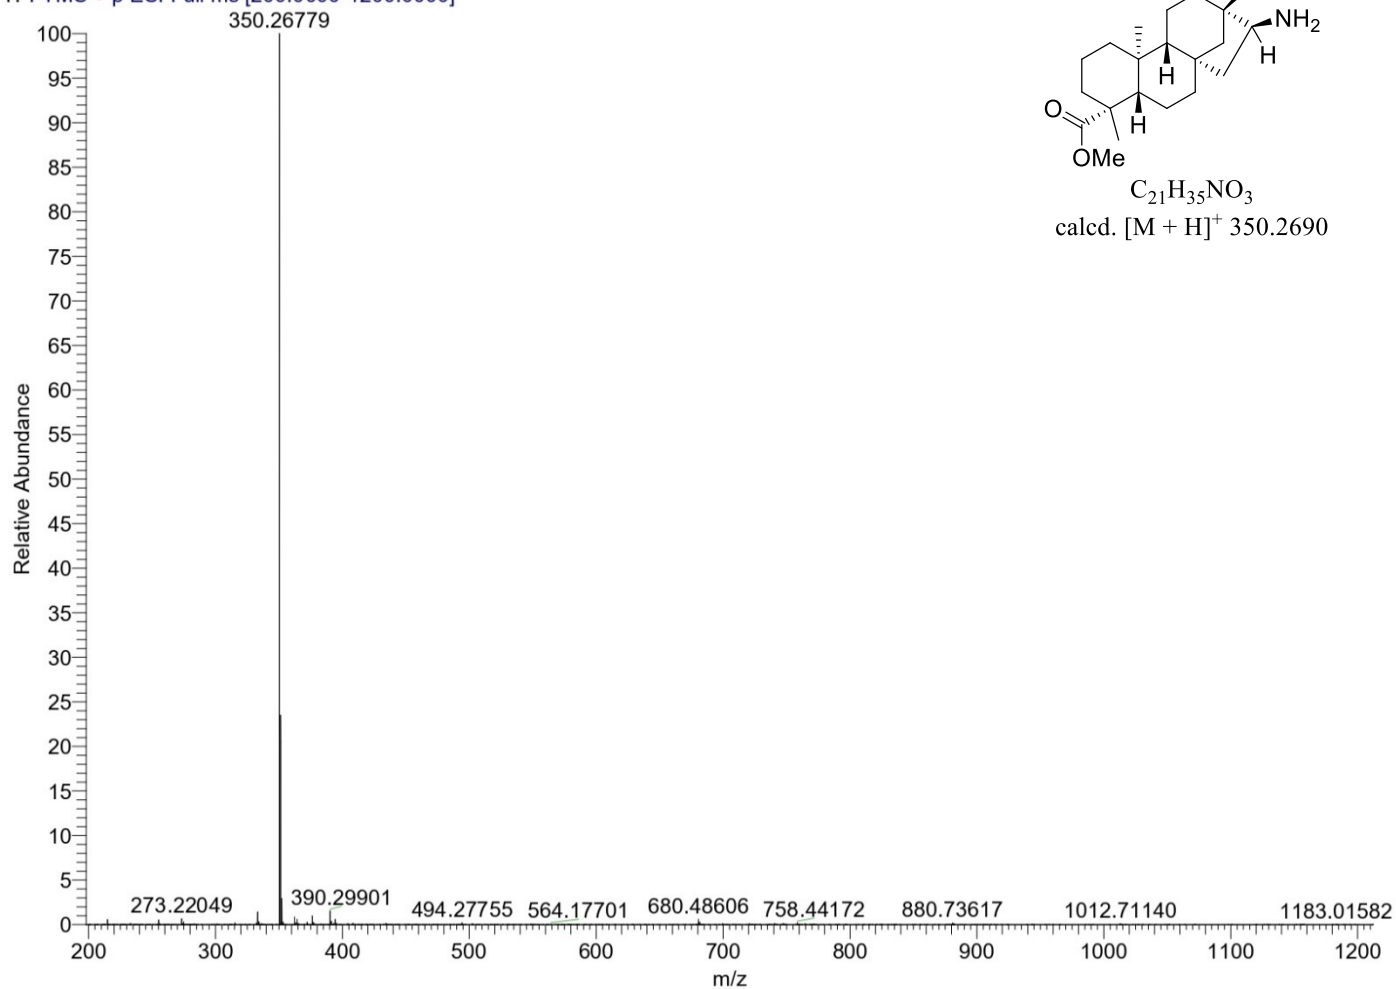

HRMS of compound (4*R*,4*aS*,6*aR*,8*R*,9*R*,11*aR*,11*bS*)-methyl 8-(benzylamino)-9-(hydroxymethyl)-4,11*b*-dimethyltetradecahydro-6*a*,9-methanocyclohepta[*a*]naphthalene-4-carboxylate (**8**)

D:\DATA\...Robi\20230927\GYK-20230927-1  
D3-tol

09/27/23 16:24:56

GYK-20230927-1 #35605-35679 RT: 79.04-79.21 AV: 75 NL: 4.44E8

T: FTMS + p ESI Full ms [200.0000-1200.0000]

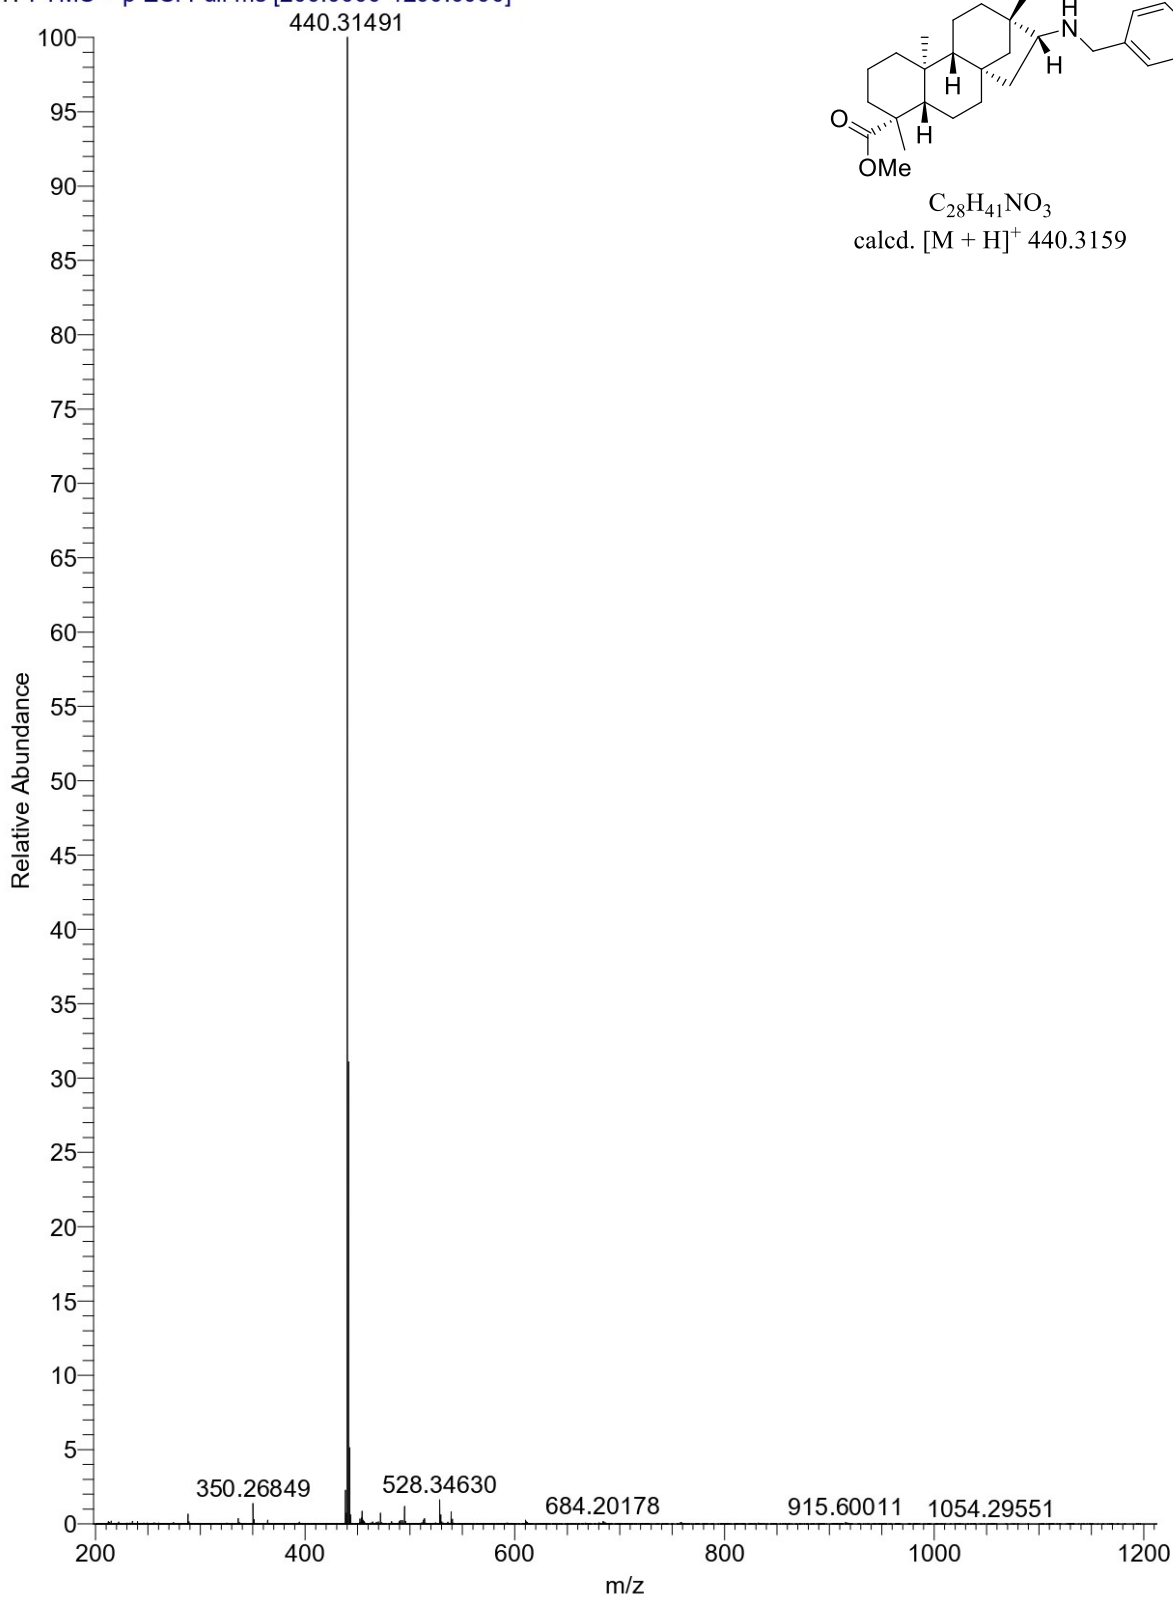

HRMS of compound (4*R*,4*aS*,6*aR*,8*R*,9*R*,11*aR*,11*bS*)-methyl 8-((4-fluorobenzyl)amino)-9-(hydroxymethyl)-4,11*b*-dimethyltetradecahydro-6*a*,9-methanocyclohepta[*a*]naphthalene-4-carboxylate (**9**)

D:\DATA\...\Robi\20230927\GYK-20230927-1  
D3-tol

09/27/23 16:24:56

GYK-20230927-1 #36348-36406 RT: 80.69-80.82 AV: 59 NL: 6.56E8

T: FTMS + p ESI Full ms [200.0000-1200.0000]

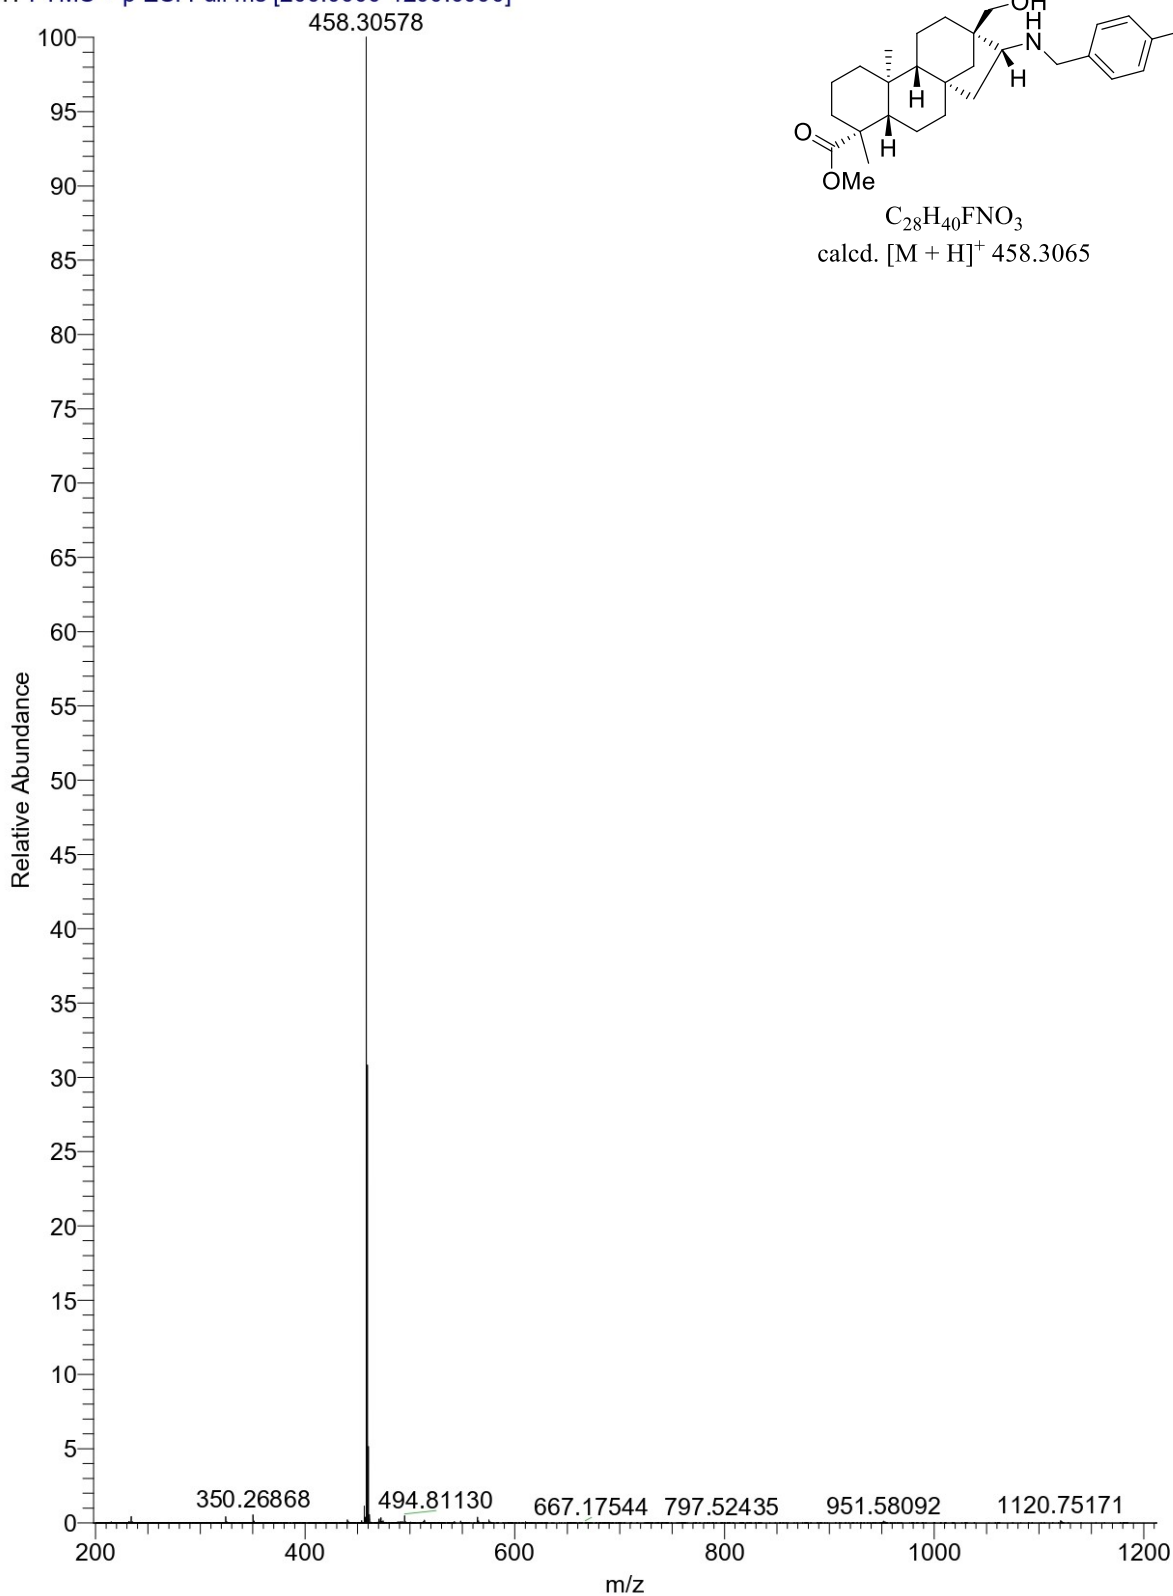



HRMS of compound (4*R*,4*aS*,6*aR*,8*R*,9*R*,11*aR*,11*bS*)-methyl 9-(hydroxymethyl)-8-((4-methoxybenzyl)amino)-4,11*b*-dimethyltetradecahydro-6*a*,9-methanocyclohepta[*a*]naphthalene-4-carboxylate (**10**)

D:\DATA\...\Robi\20230927\GYK-20230927-1  
D3-tol

09/27/23 16:24:56

GYK-20230927-1 #42238-42278 RT: 93.77-93.86 AV: 41 NL: 1.36E9

T: FTMS + p ESI Full ms [200.0000-1200.0000]

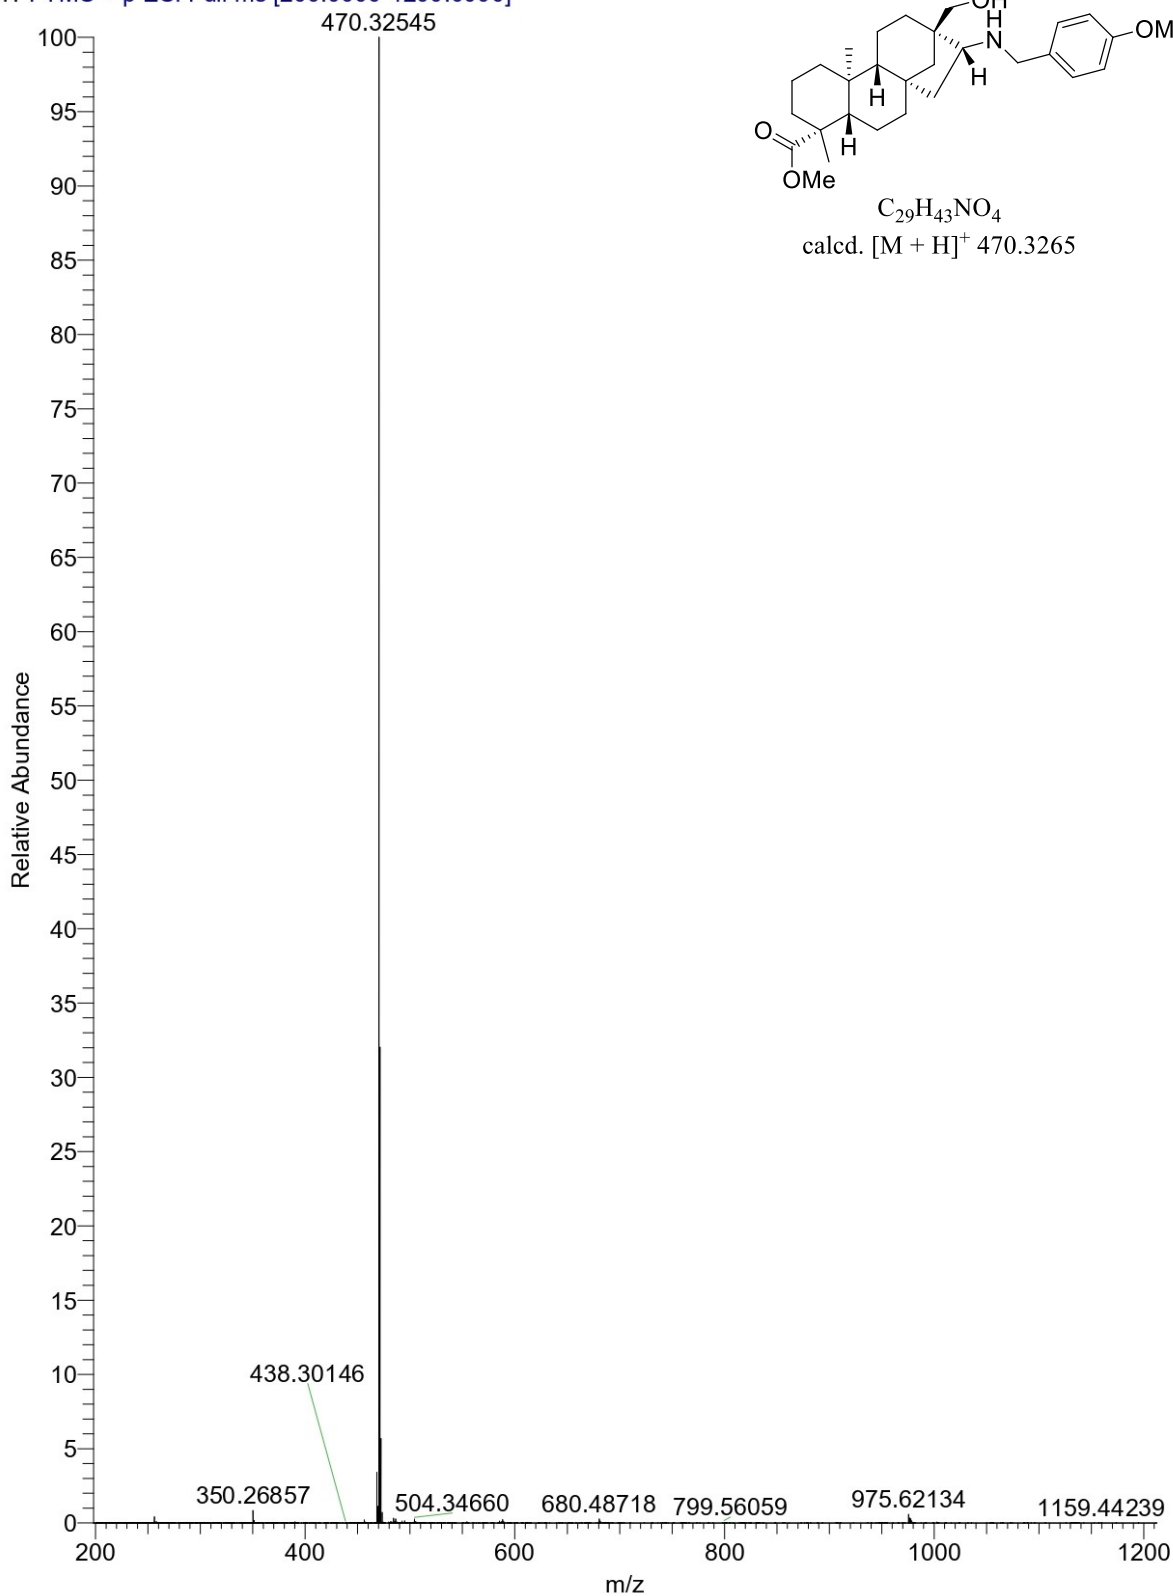

HRMS of compound (4*R*,4*aS*,6*aR*,8*R*,9*R*,11*aR*,11*bS*)-methyl 9-(hydroxymethyl)-4,11*b*-dimethyl-8-(((*S*)-1-phenylpropyl)amino)tetradecahydro-6*a*,9-methanocyclohepta[*a*]naphthalene-4-carboxylate (11)

D:\DATA\...IRobil\20230927\GYK-20230927-1  
D3-tol

09/27/23 16:24:56

GYK-20230927-1 #37079-37132 RT: 82.31-82.43 AV: 54 NL: 7.46E8

T: FTMS + p ESI Full ms [200.0000-1200.0000]

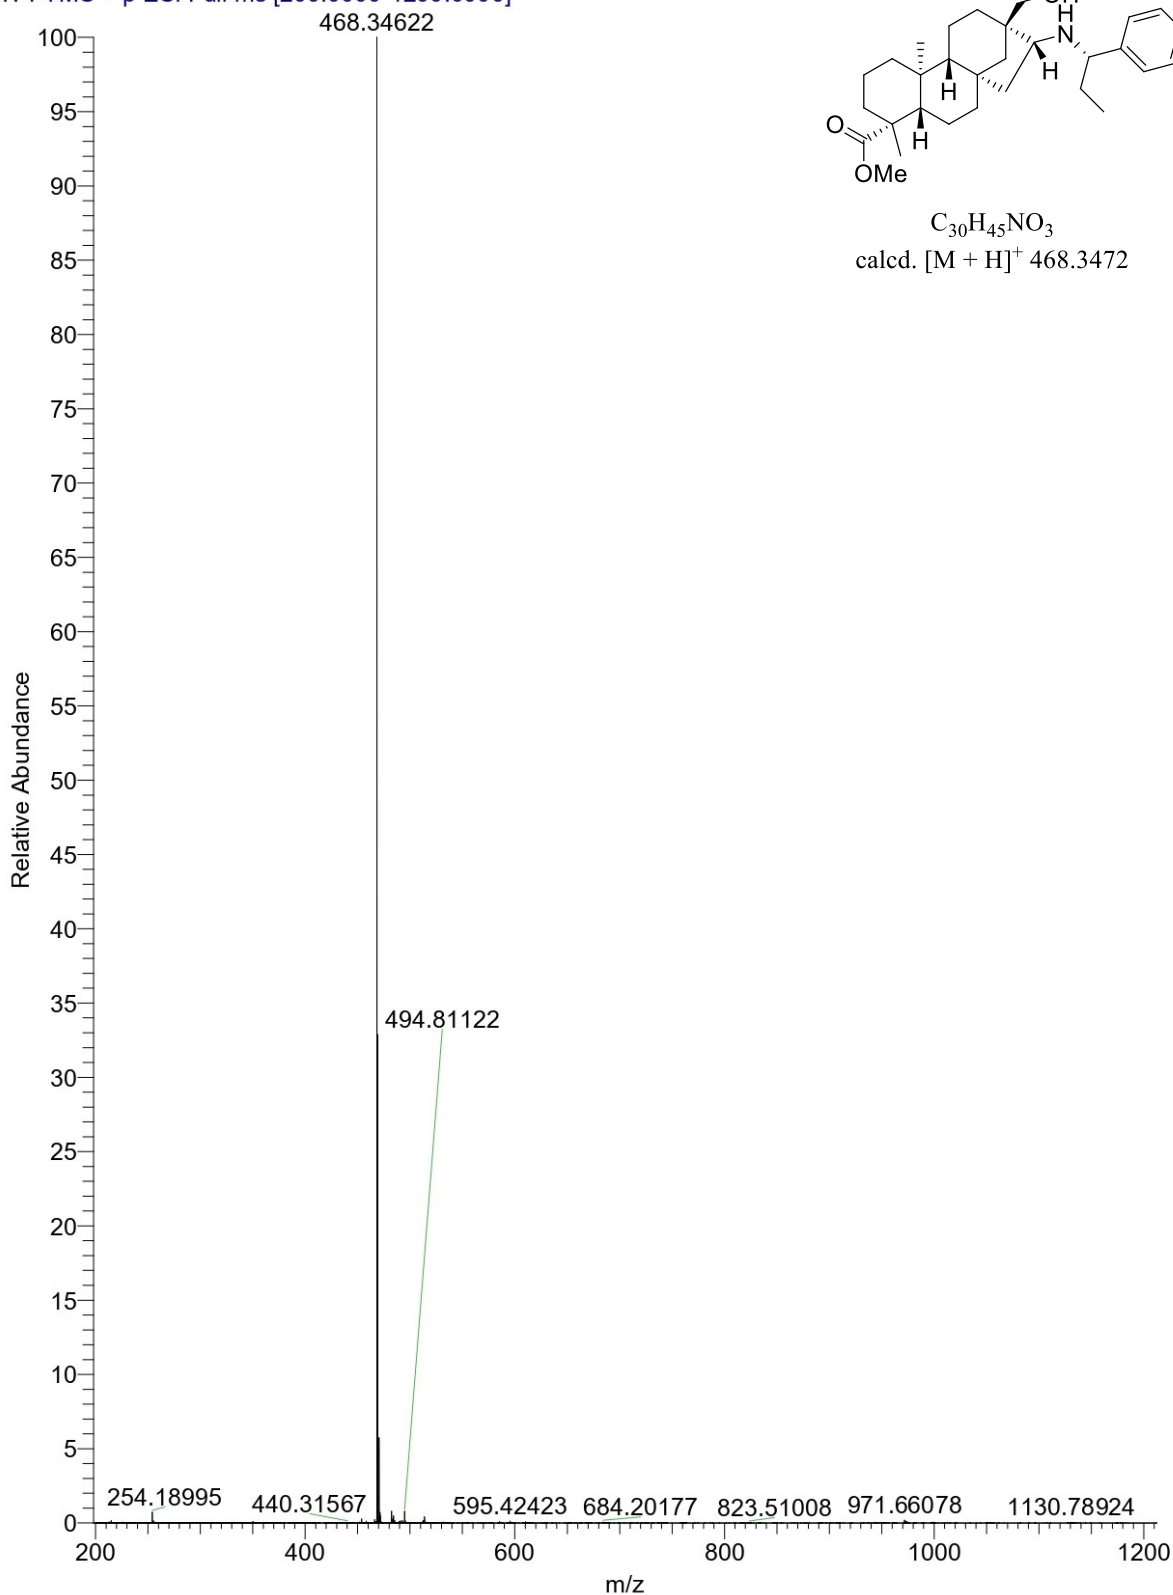

HRMS of compound (4*R*,4*aS*,6*aR*,8*R*,9*R*,11*aR*,11*bS*)-methyl 9-(hydroxymethyl)-4,11*b*-dimethyl-8-(((*R*)-1-phenylpropyl)amino)tetradecahydro-6*a*,9-methanocyclohepta[*a*]naphthalene-4-carboxylate (12)

D:\DATA\...IRobil\20230927\GYK-20230927-1  
D3-tol

09/27/23 16:24:56

GYK-20230927-1 #37806-37859 RT: 83.93-84.04 AV: 54 NL: 1.04E9

T: FTMS + p ESI Full ms [200.0000-1200.0000]

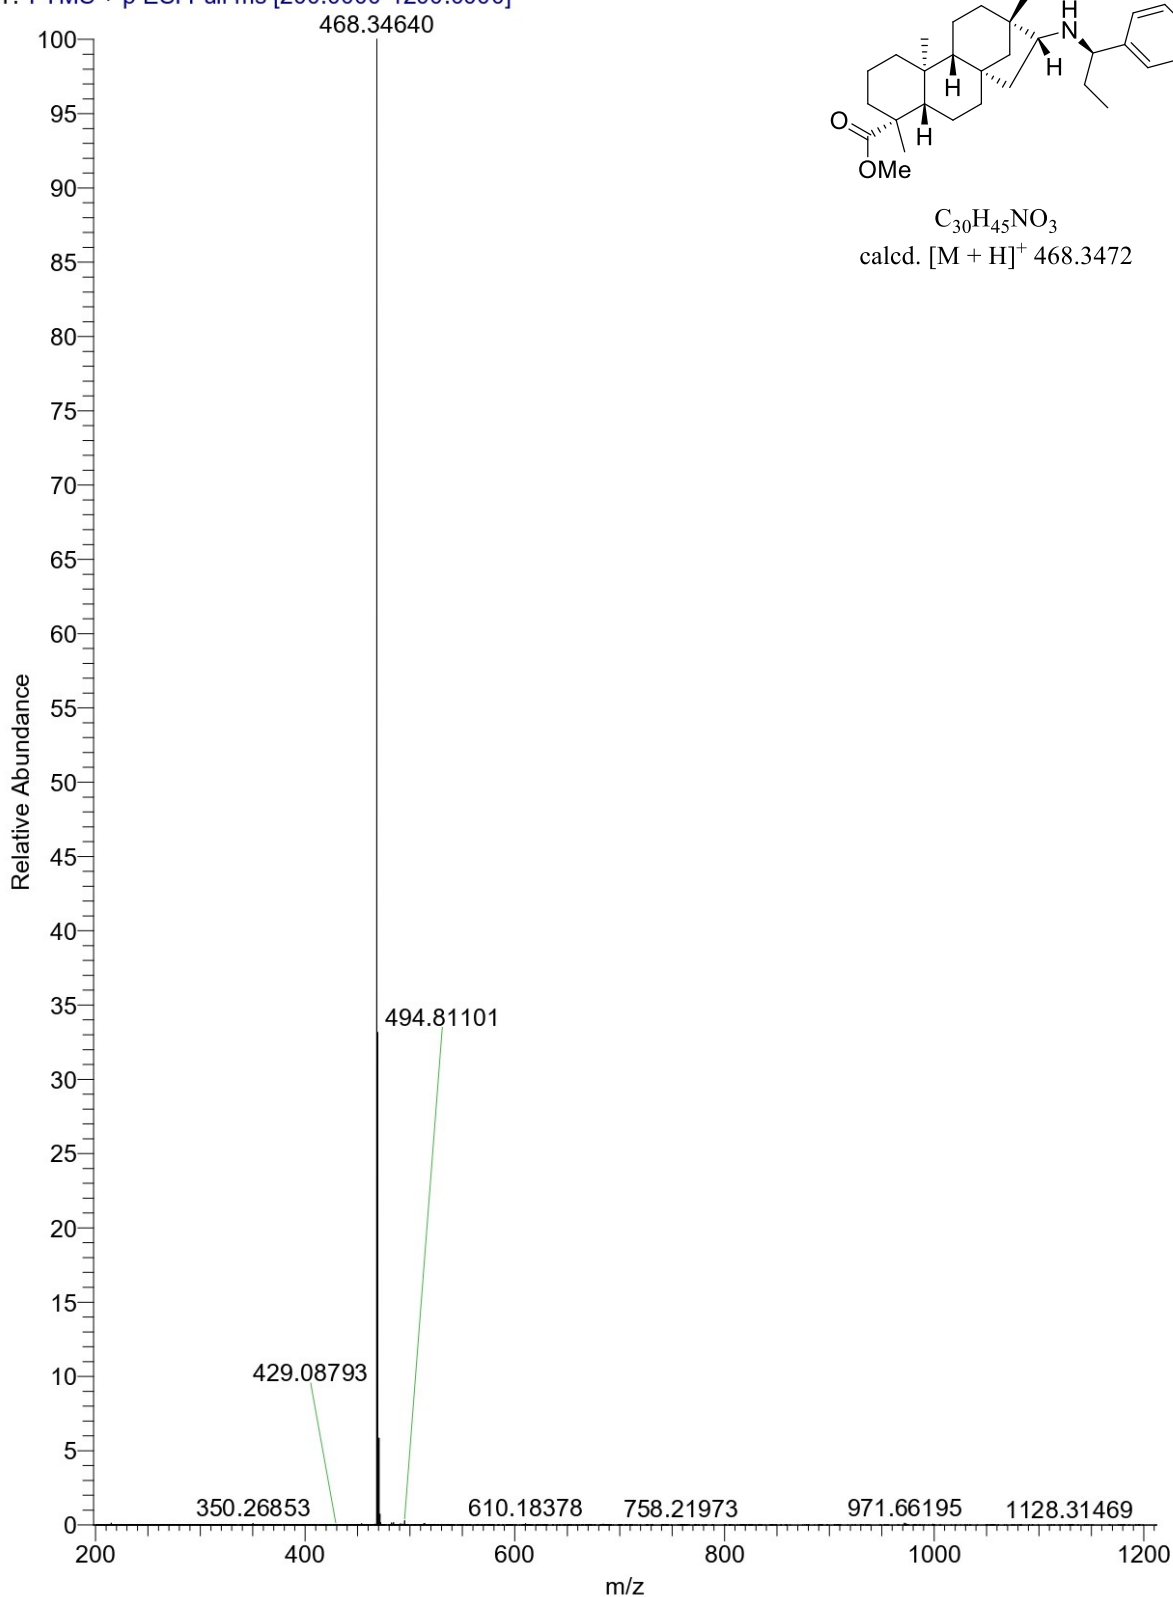

HRMS of compound (4*R*,4*aS*,6*aR*,8*R*,9*R*,11*aR*,11*bS*)-methyl 9-(hydroxymethyl)-4,11*b*-dimethyl-8-(((*R*)-1-(naphthalen-1-yl)ethyl)amino)tetradecahydro-6*a*,9-methanocyclohepta[*a*]naphthalene-4-carboxylate (**13**)

D:\DATA\...\Robi\20230927\GYK-20230927-1  
D3-tol

09/27/23 16:24:56

GYK-20230927-1 #38591-38633 RT: 85.67-85.76 AV: 43 NL: 1.01E9

T: FTMS + p ESI Full ms [200.0000-1200.0000]

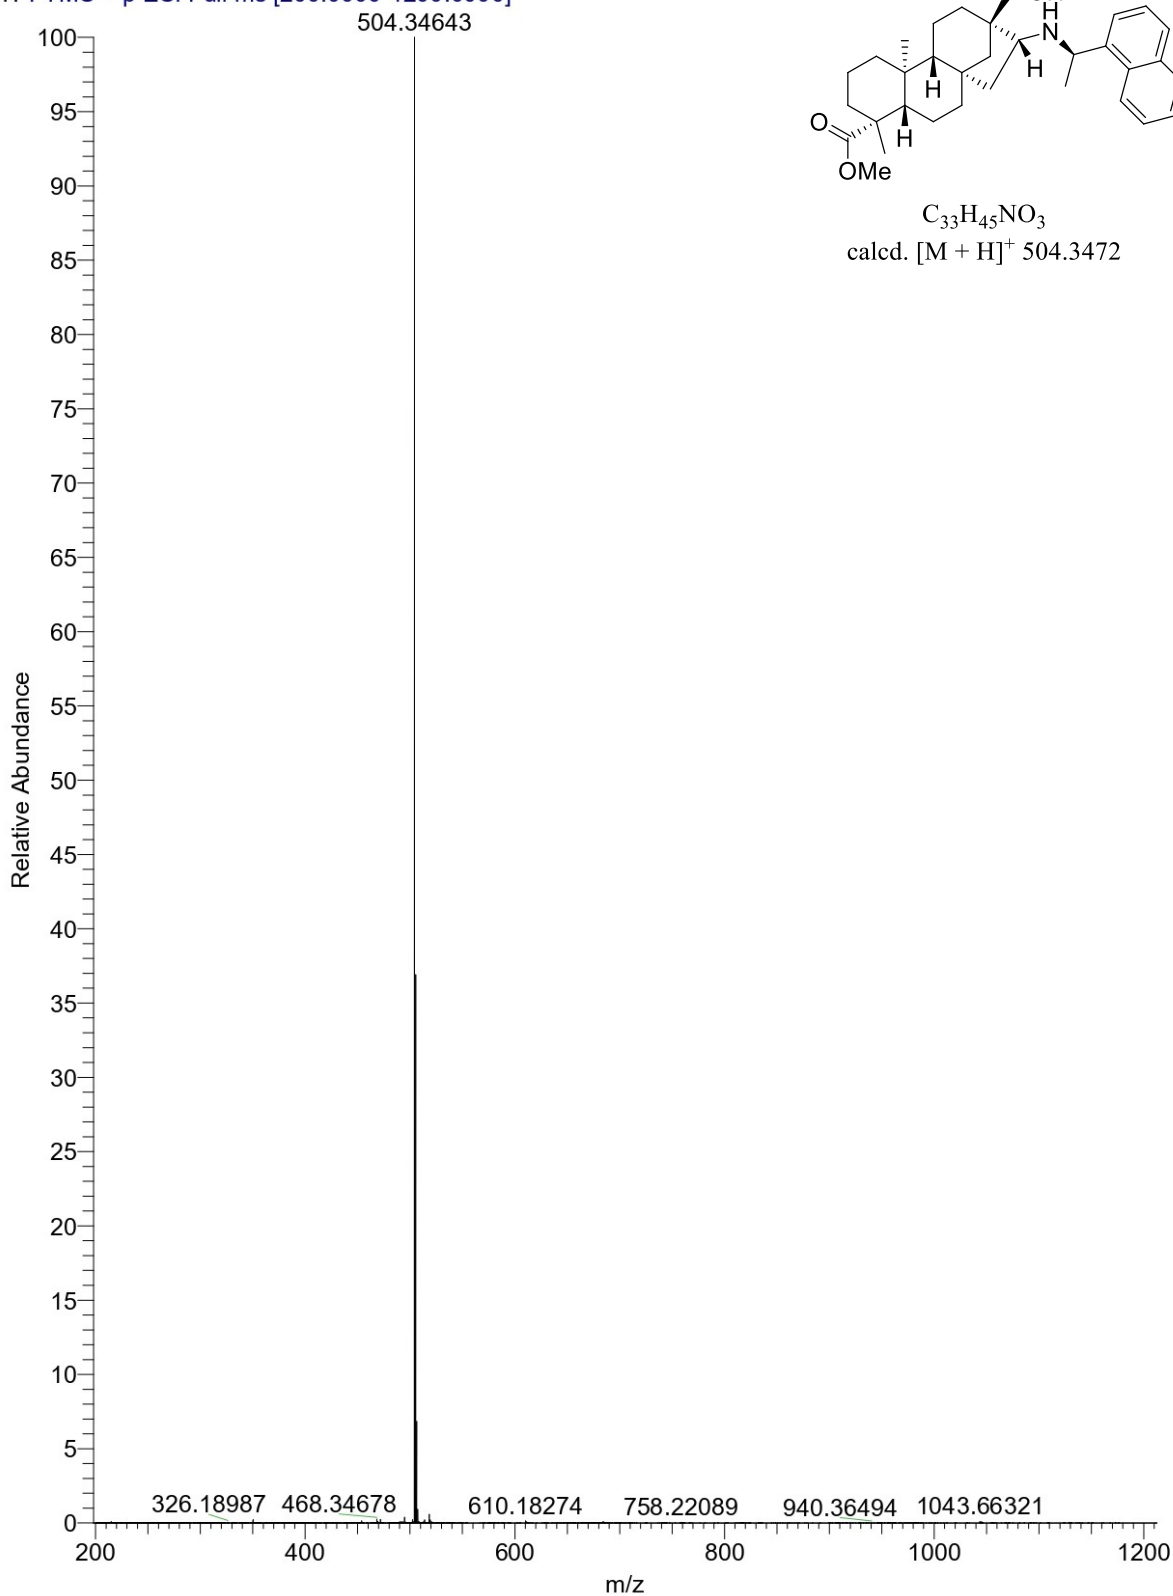

HRMS of compound (4*R*,4*aS*,6*aR*,8*R*,9*R*,11*aR*,11*bS*)-methyl 9-(hydroxymethyl)-4,11*b*-dimethyl-8-(((*S*)-1-(naphthalen-1-yl)ethyl)amino)tetradecahydro-6*a*,9-methanocyclohepta[*a*]naphthalene-4-carboxylate (**14**)

D:\DATA\...\Robi\20230927\GYK-20230927-1  
D3-tol

09/27/23 16:24:56

GYK-20230927-1 #39323-39370 RT: 87.29-87.40 AV: 48 NL: 7.54E8

T: FTMS + p ESI Full ms [200.0000-1200.0000]

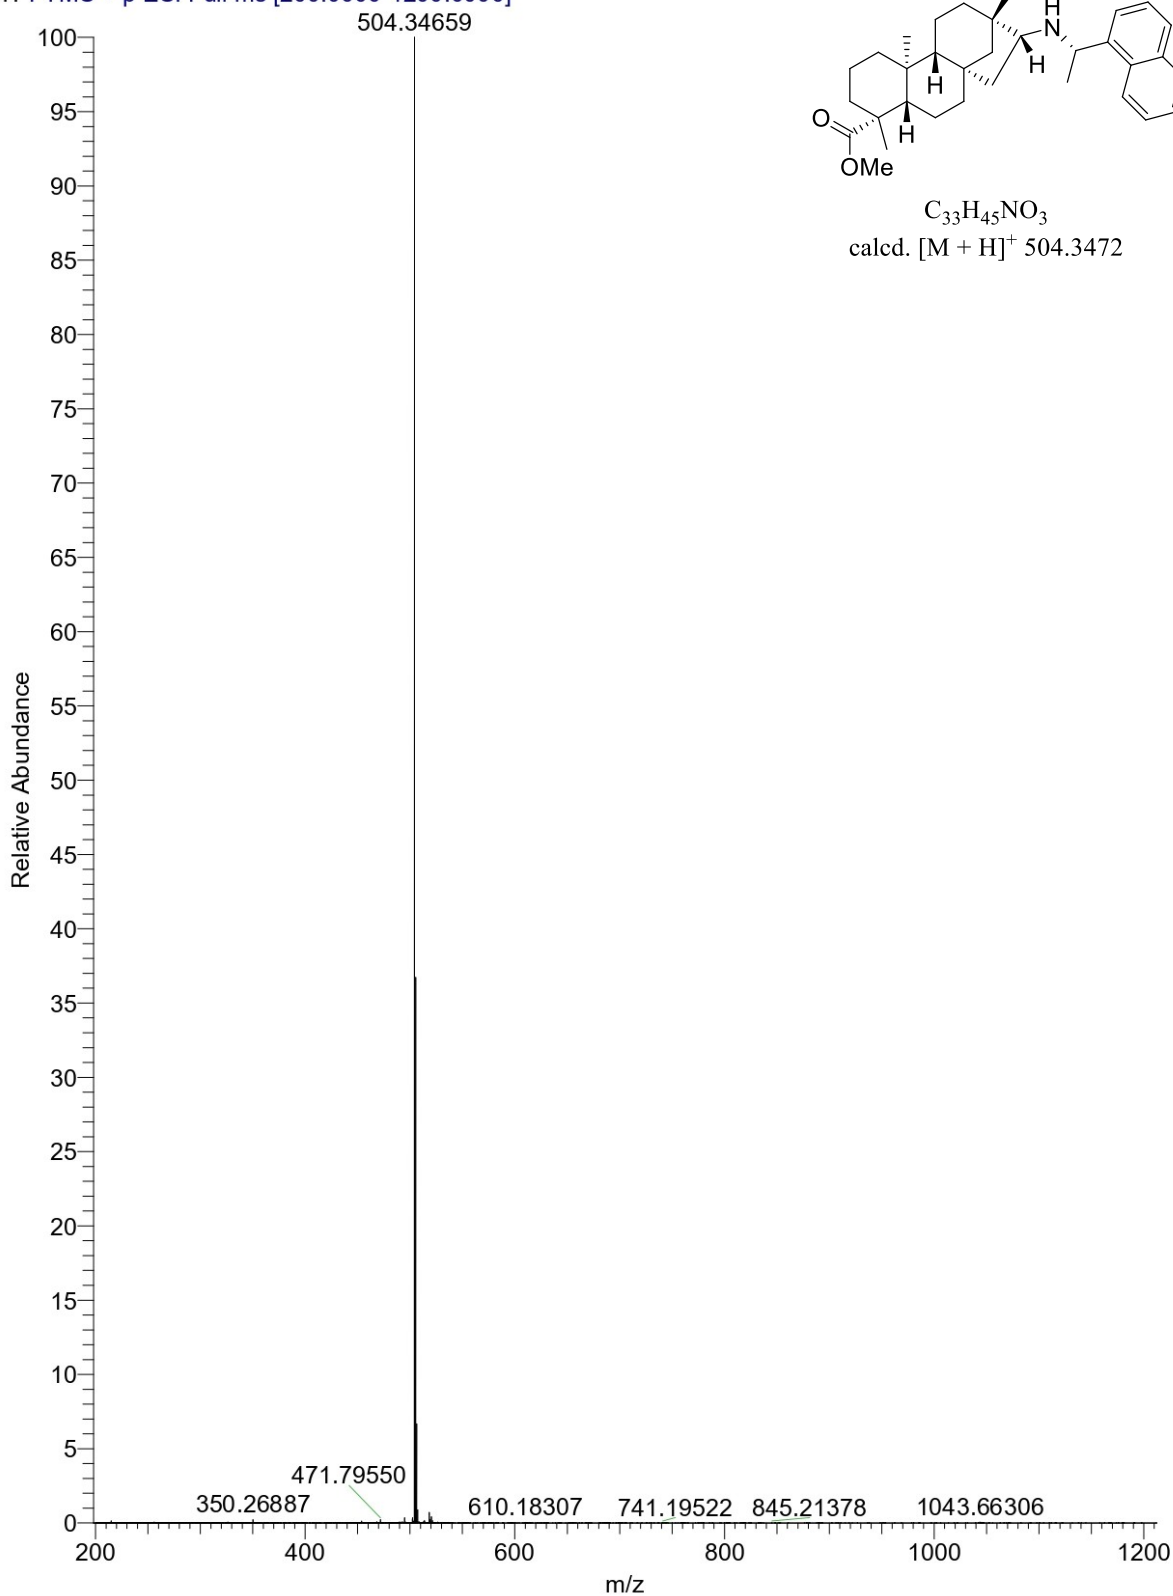

HRMS of compound (4*R*,4*aS*,6*aR*,8*R*,9*R*,11*aR*,11*bS*)-methyl 9-(hydroxymethyl)-4,11*b*-dimethyl-8-((naphthalen-1-ylmethyl)amino)tetradecahydro-6*a*,9-methanocyclohepta[*a*]naphthalene-4-carboxylate (**15**)

D:\DATA\...\Robi\20230927\GYK-20230927-1  
D3-tol

09/27/23 16:24:56

GYK-20230927-1 #40060-40091 RT: 88.93-89.00 AV: 32 NL: 1.07E9

T: FTMS + p ESI Full ms [200.0000-1200.0000]

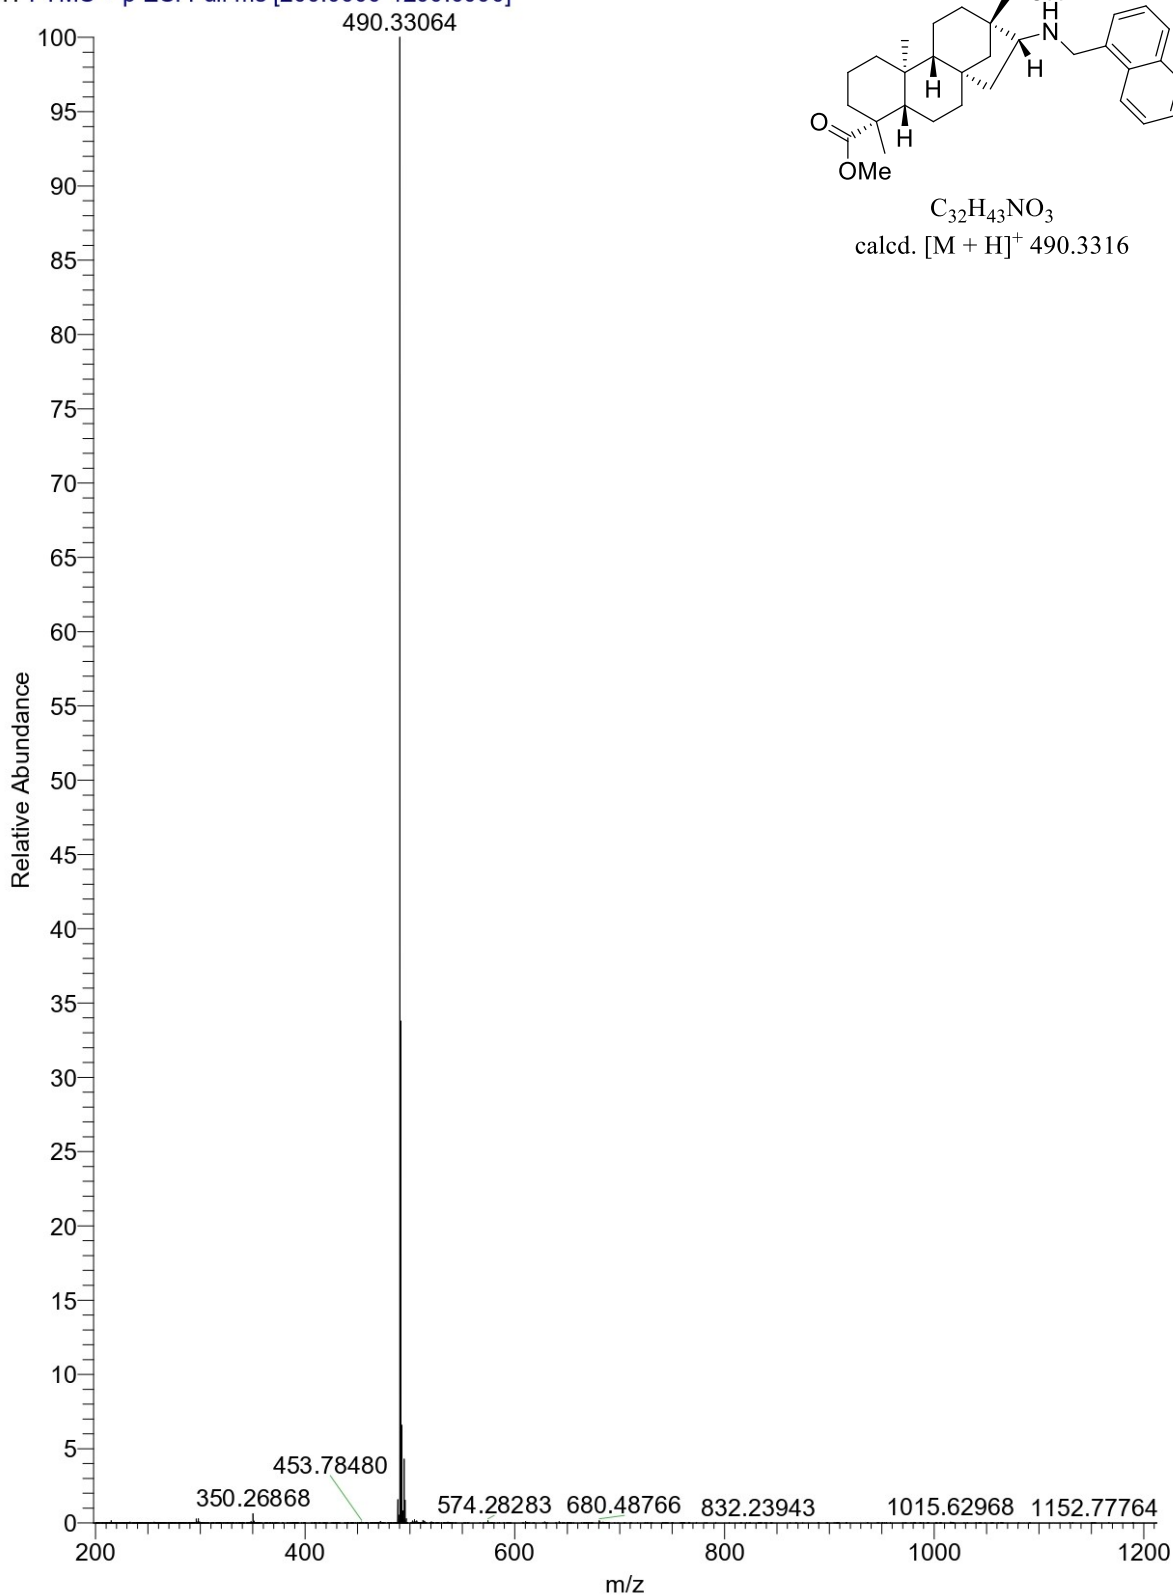

HRMS of compound (4*R*,4*aS*,6*aR*,8*R*,9*R*,11*aR*,11*bS*)-methyl 9-(hydroxymethyl)-4,11*b*-dimethyl-8-(((*S*)-1-(naphthalen-2-yl)ethyl)amino)tetradecahydro-6*a*,9-methanocyclohepta[*a*]naphthalene-4-carboxylate (**16**)

D:\DATA\...\Robi\20230927\GYK-20230927-1  
D3-tol

09/27/23 16:24:56

GYK-20230927-1 #40780-40812 RT: 90.53-90.60 AV: 33 NL: 1.40E9

T: FTMS + p ESI Full ms [200.0000-1200.0000]

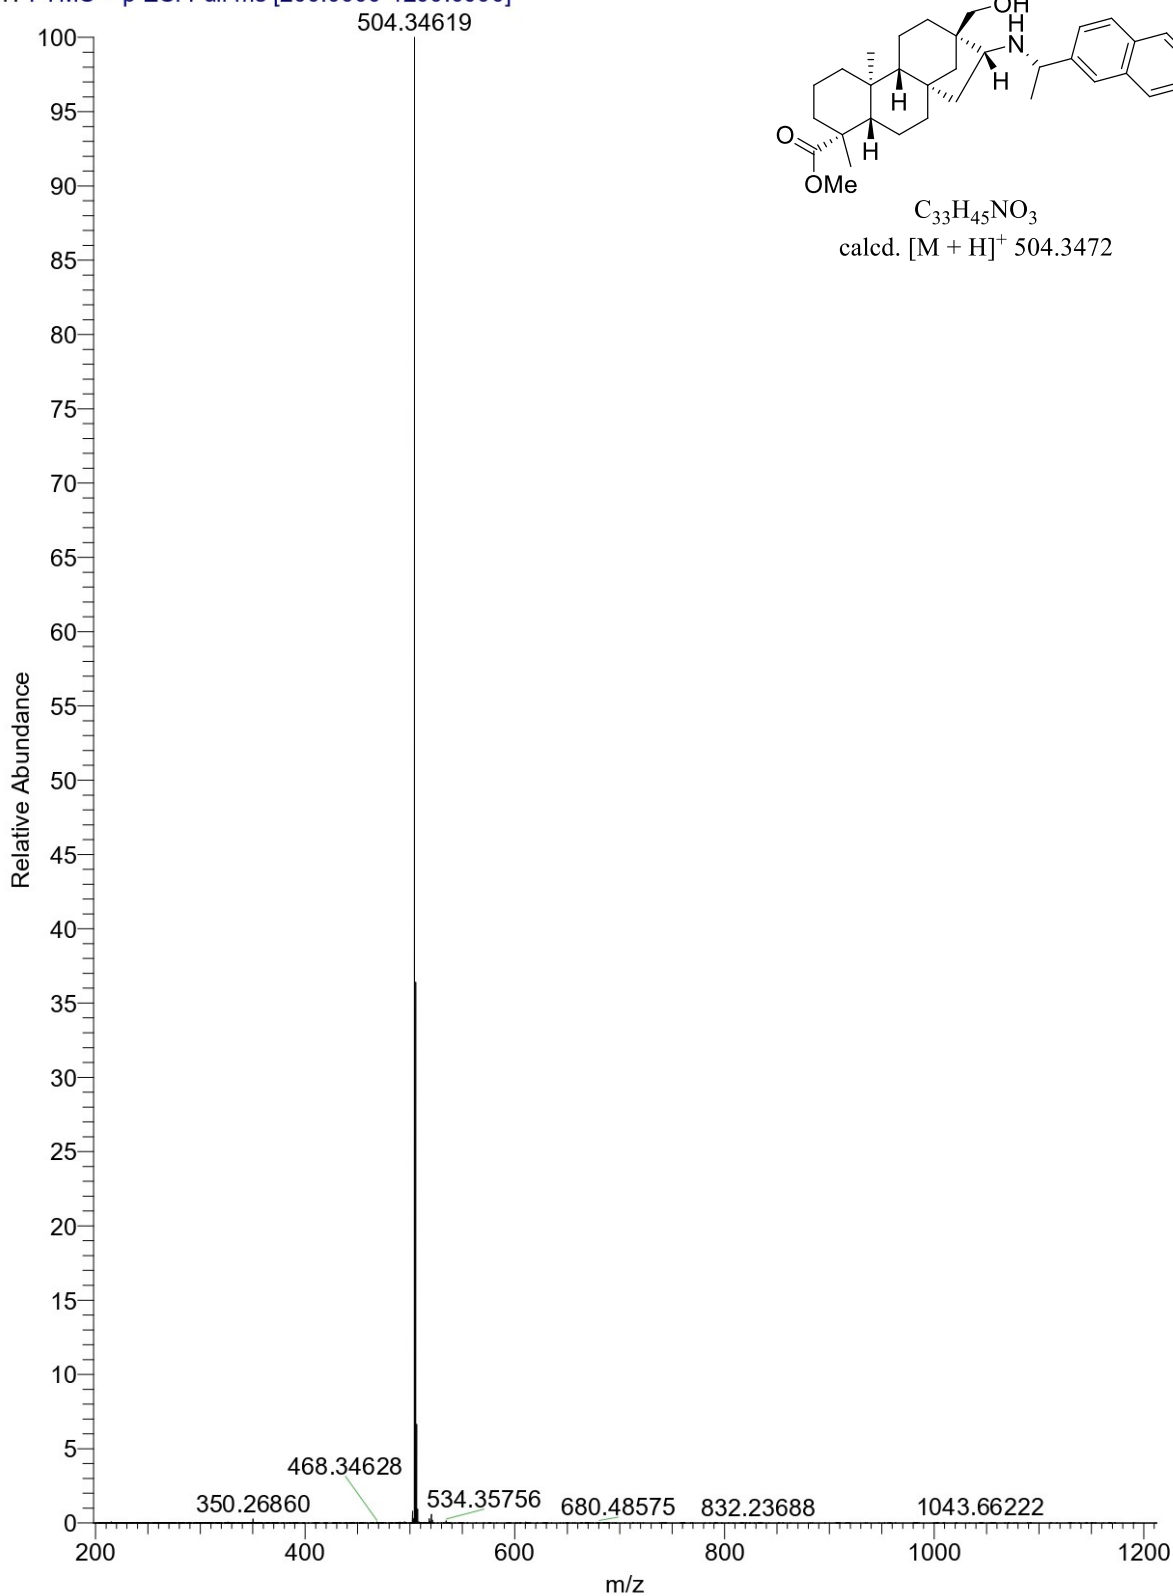

HRMS of compound (4*R*,4*aS*,6*aR*,8*R*,9*R*,11*aR*,11*bS*)-methyl 9-(hydroxymethyl)-4,11*b*-dimethyl-8-(((*R*)-1-(naphthalen-2-yl)ethyl)amino)tetradecahydro-6*a*,9-methanocyclohepta[*a*]naphthalene-4-carboxylate (**17**)

D:\DATA\...\Robi\20230927\GYK-20230927-1  
D3-tol

09/27/23 16:24:56

GYK-20230927-1 #41506-41531 RT: 92.14-92.20 AV: 26 NL: 1.39E9

T: FTMS + p ESI Full ms [200.0000-1200.0000]

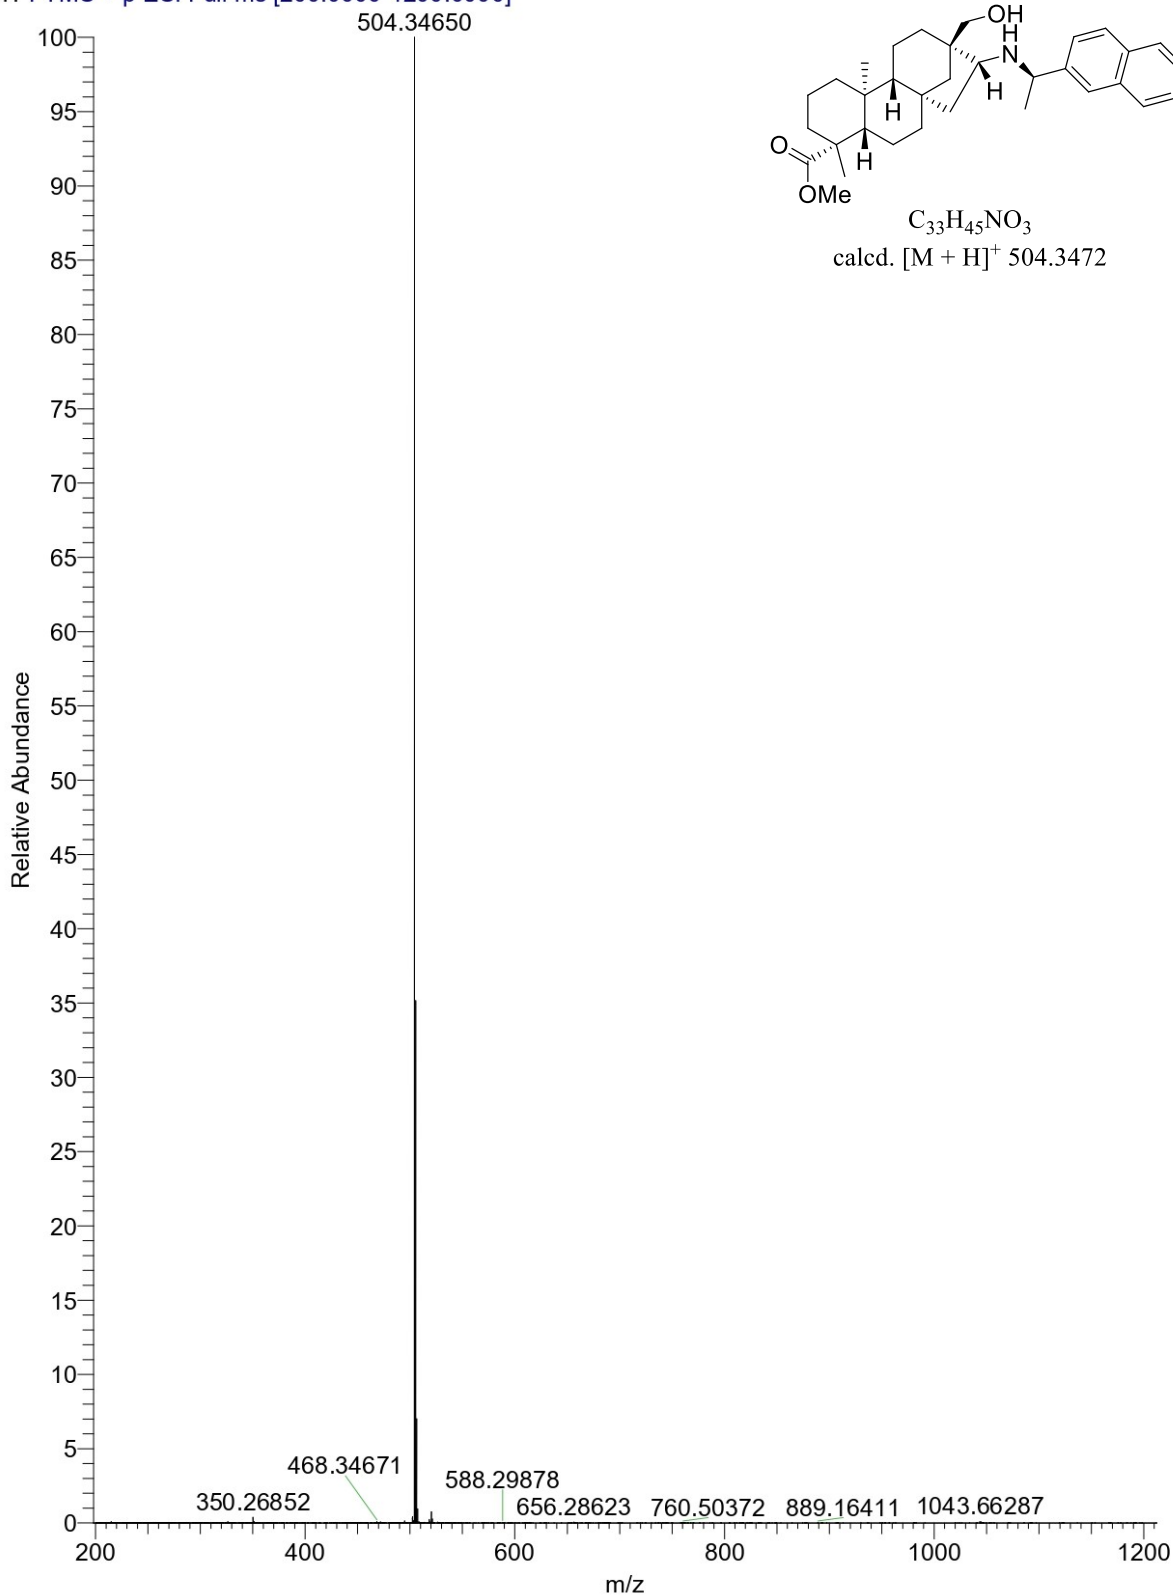



HRMS of compound (4*R*,4*aS*,6*aR*,9*S*,11*aR*,11*bS*)-methyl 4,11*b*-dimethyl-9-(((methylsulfonyl)oxy)methyl)-8-oxotetradecahydro-6*a*,9-methanocyclohepta[*a*]naphthalene-4-carboxylate (**18**)

D:\DATAExp\...120231103\GYK-20230927

11/03/23 11:26:54

FR, HG, HM

GYK-20230927 #2266-2308 RT: 5.03-5.12 AV: 43 NL: 5.84E8

T: FTMS + p ESI Full ms [200.0000-1200.0000]

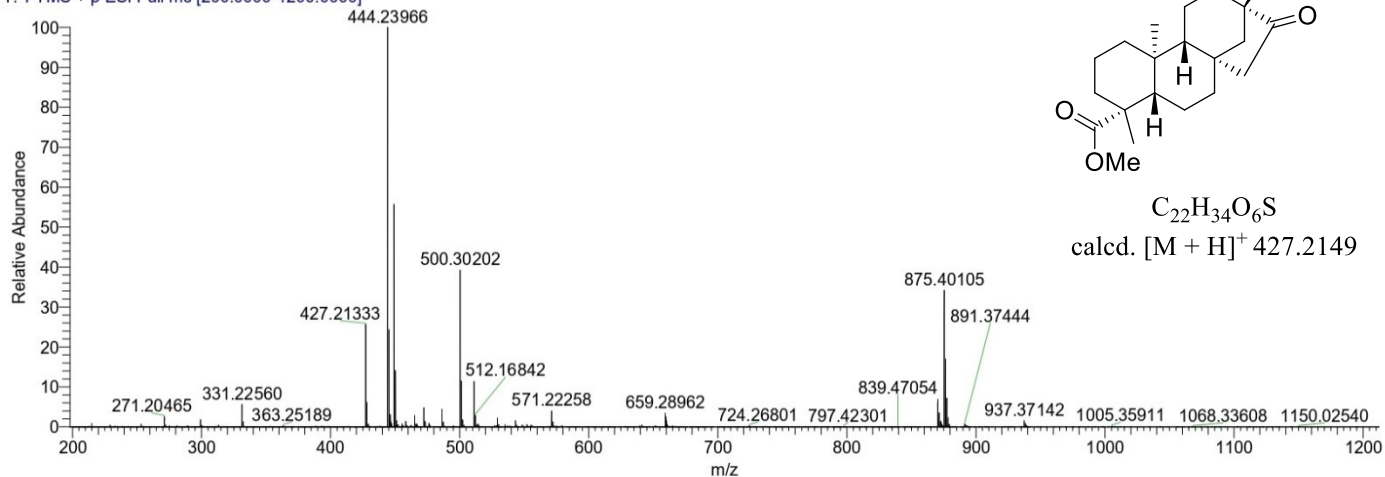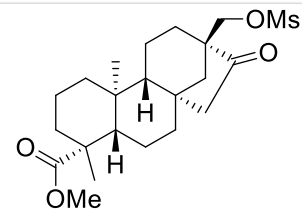

$C_{22}H_{34}O_6S$   
calcd.  $[M + H]^+$  427.2149

GYK-20230927 #2266-2308 RT: 5.03-5.12 AV: 43 NL: 5.84E8

T: FTMS + p ESI Full ms [200.0000-1200.0000]

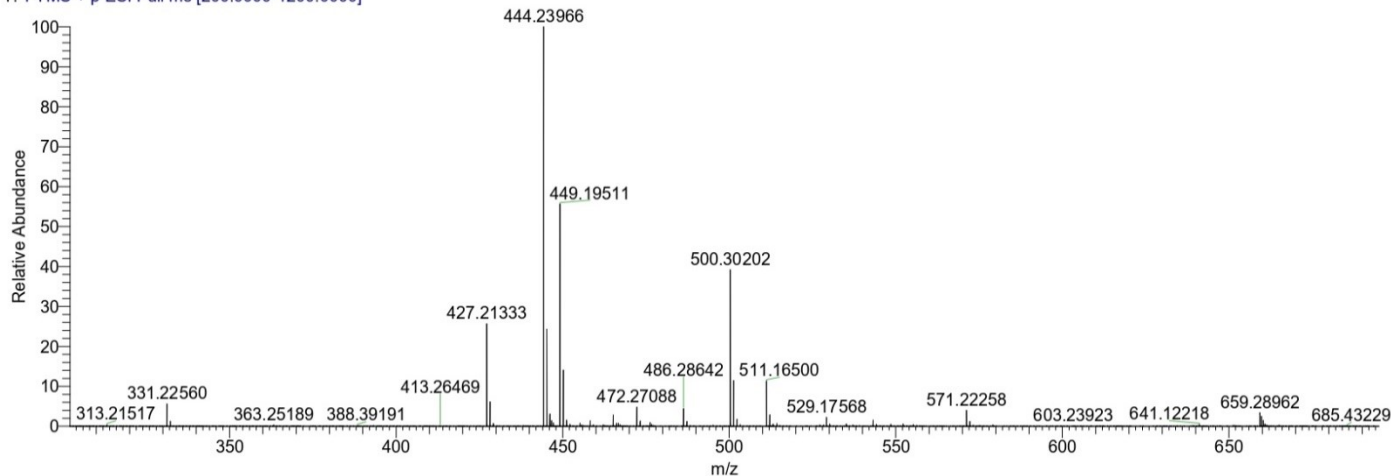

HRMS of compound (4*R*,4*aS*,6*aR*,9*S*,11*aR*,11*bS*)-methyl 9-(azidomethyl)-4,11*b*-dimethyl-8-oxotetradecahydro-6*a*,9-methanocyclohepta[*a*]naphthalene-4-carboxylate (**19**)

D:\DATAExp\...\20231103\GYK-20230927

11/03/23 11:26:54

FR, HG, HM

GYK-20230927 #2999-3029 RT: 6.65-6.72 AV: 31 NL: 9.51E7

T: FTMS + p ESI Full ms [200.0000-1200.0000]

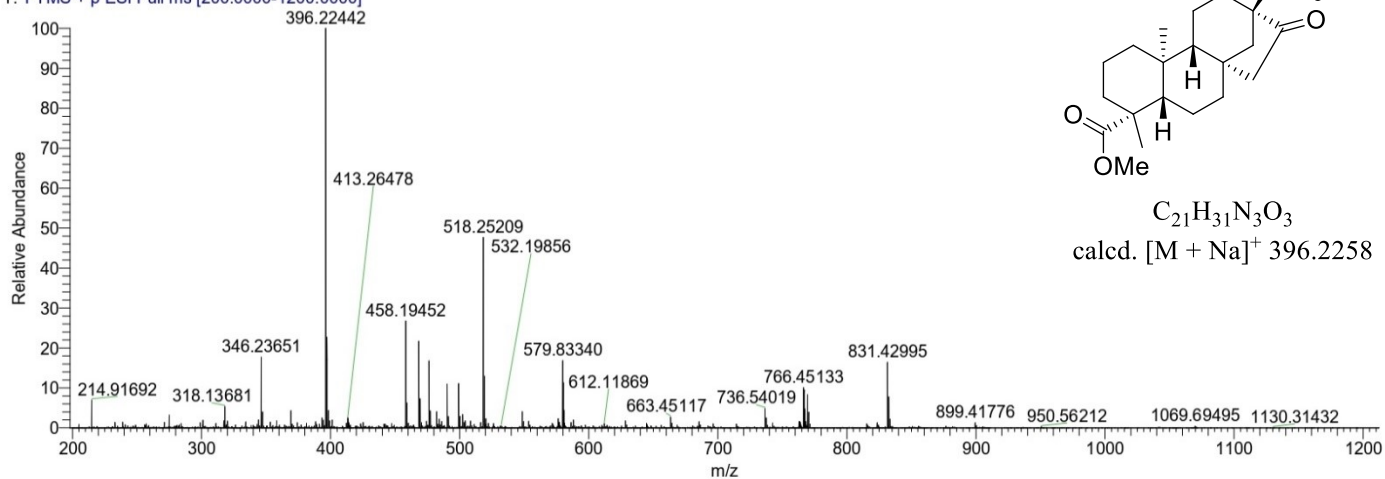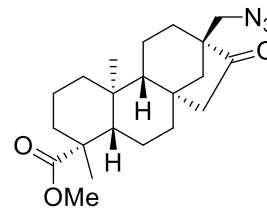

C<sub>21</sub>H<sub>31</sub>N<sub>3</sub>O<sub>3</sub>  
calcd. [M + Na]<sup>+</sup> 396.2258

GYK-20230927 #2999-3029 RT: 6.65-6.72 AV: 31 NL: 9.51E7

T: FTMS + p ESI Full ms [200.0000-1200.0000]

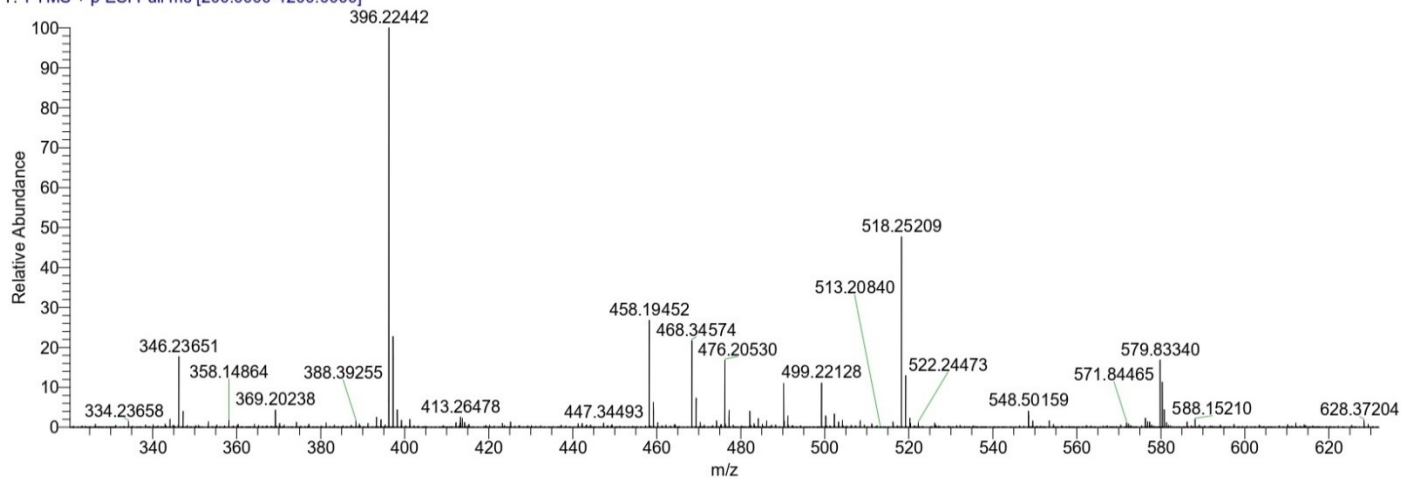

HRMS of compound (4*R*,4*aS*,6*aR*,8*R*,9*S*,11*aR*,11*bS*)-methyl 9-(azidomethyl)-8-hydroxy-4,11*b*-dimethyltetradecahydro-6*a*,9-methanocyclohepta[*a*]naphthalene-4-carboxylate (**20**)

D:\DATAExp\...\20231103\GYK-20230927  
FR, HG, HM

11/03/23 11:26:54

GYK-20230927 #3724-3751 RT: 8.26-8.32 AV: 28 NL: 8.45E7

T: FTMS + p ESI Full ms [200.0000-1200.0000]

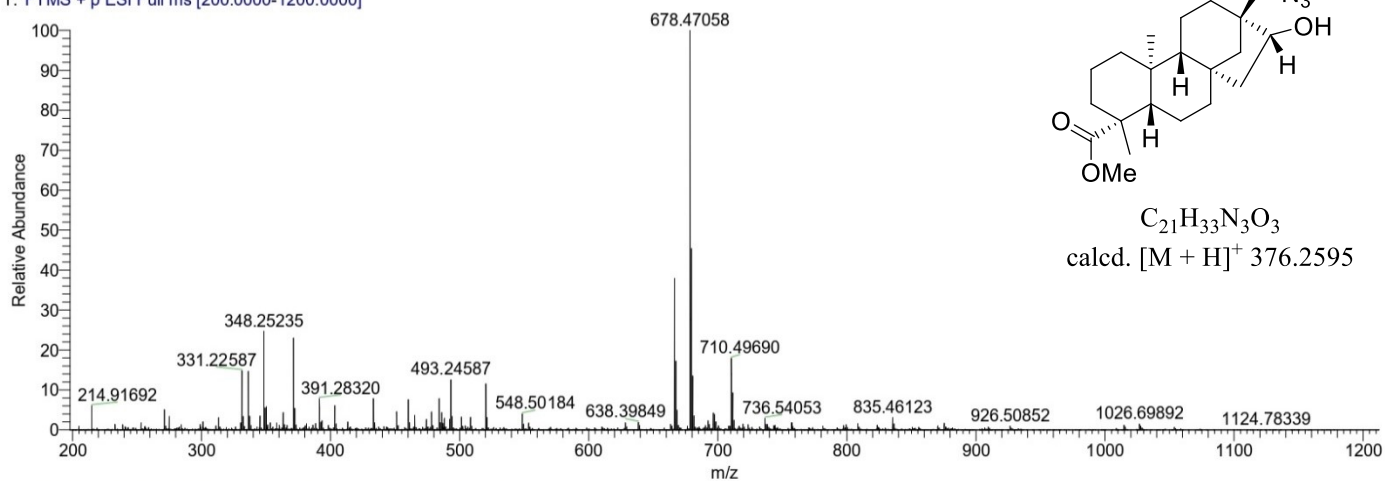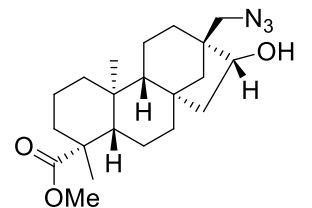

$C_{21}H_{33}N_3O_3$   
calcd.  $[M + H]^+$  376.2595

GYK-20230927 #3724-3751 RT: 8.26-8.32 AV: 28 NL: 2.09E7

T: FTMS + p ESI Full ms [200.0000-1200.0000]

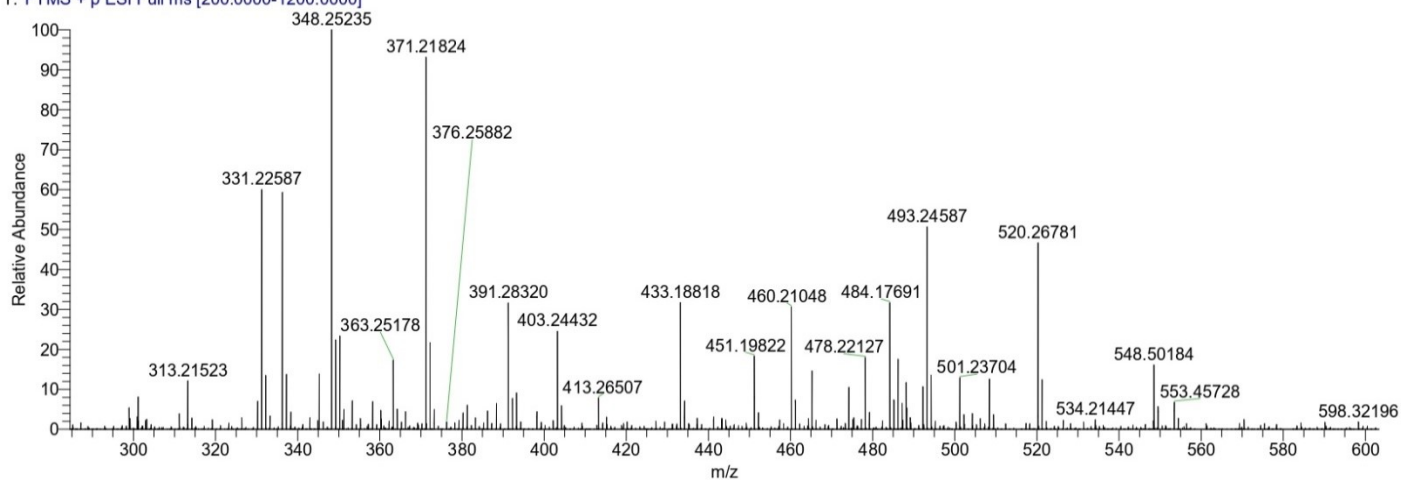

HRMS of compound (4*R*,4*aS*,6*aR*,8*R*,9*S*,11*aR*,11*bS*)-methyl 8-hydroxy-4,11*b*-dimethyl-9-(((methylsulfonyl)oxy)methyl)tetradecahydro-6*a*,9-methanocyclohepta[*a*]naphthalene-4-carboxylate (**21**)

D:\DATAExp\...20231103\GYK-20230927

11/03/23 11:26:54

FR, HG, HM

GYK-20230927 #4448-4486 RT: 9.87-9.95 AV: 39 NL: 2.61E8

T: FTMS + p ESI Full ms [200.0000-1200.0000]

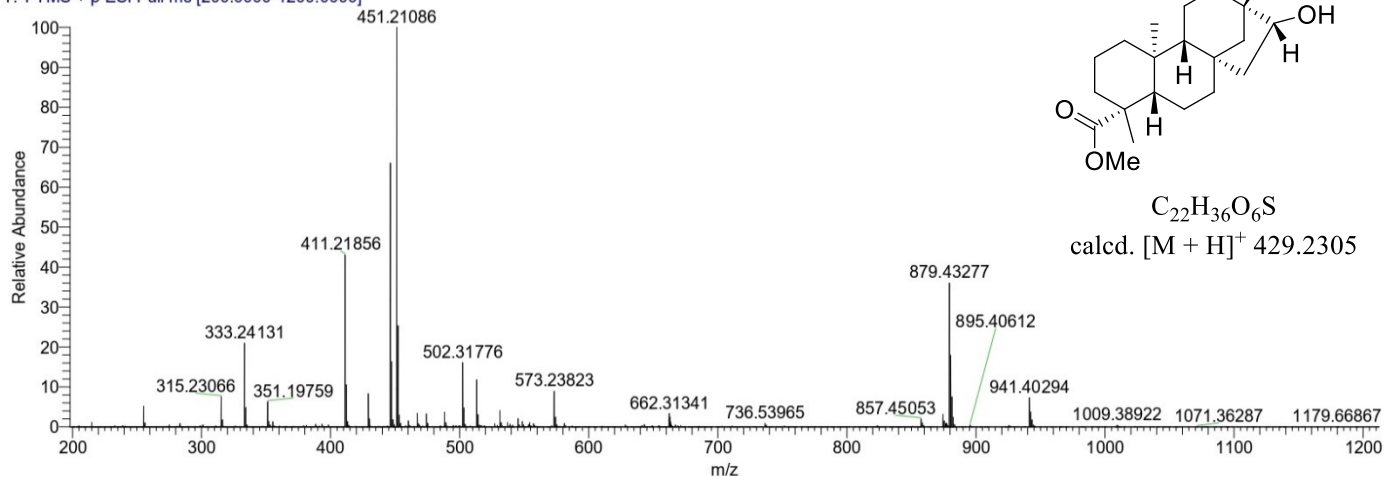

GYK-20230927 #4448-4486 RT: 9.87-9.95 AV: 39 NL: 2.61E8

T: FTMS + p ESI Full ms [200.0000-1200.0000]

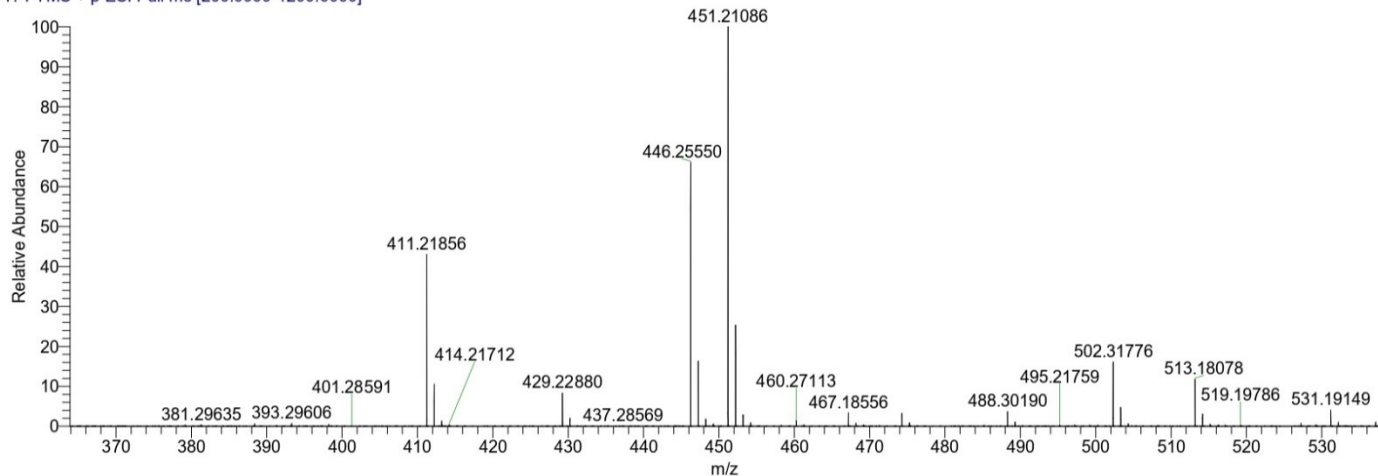

HRMS of compound (4*R*,4*a**S*,6*a**R*,8*R*,9*S*,11*a**R*,11*b**S*)-methyl 9-((benzylamino)methyl)-8-hydroxy-4,11*b*-dimethyltetradecahydro-6*a*,9-methanocyclohepta[*a*]naphthalene-4-carboxylate (**22**)

D:\DATA\...\Robi\20230927\GYK-20230927-1  
D3-tol

09/27/23 16:24:56

GYK-20230927-1 #46710-46769 RT: 103.69-103.83 AV: 60 NL: 4.48E8

T: FTMS + p ESI Full ms [200.0000-1200.0000]

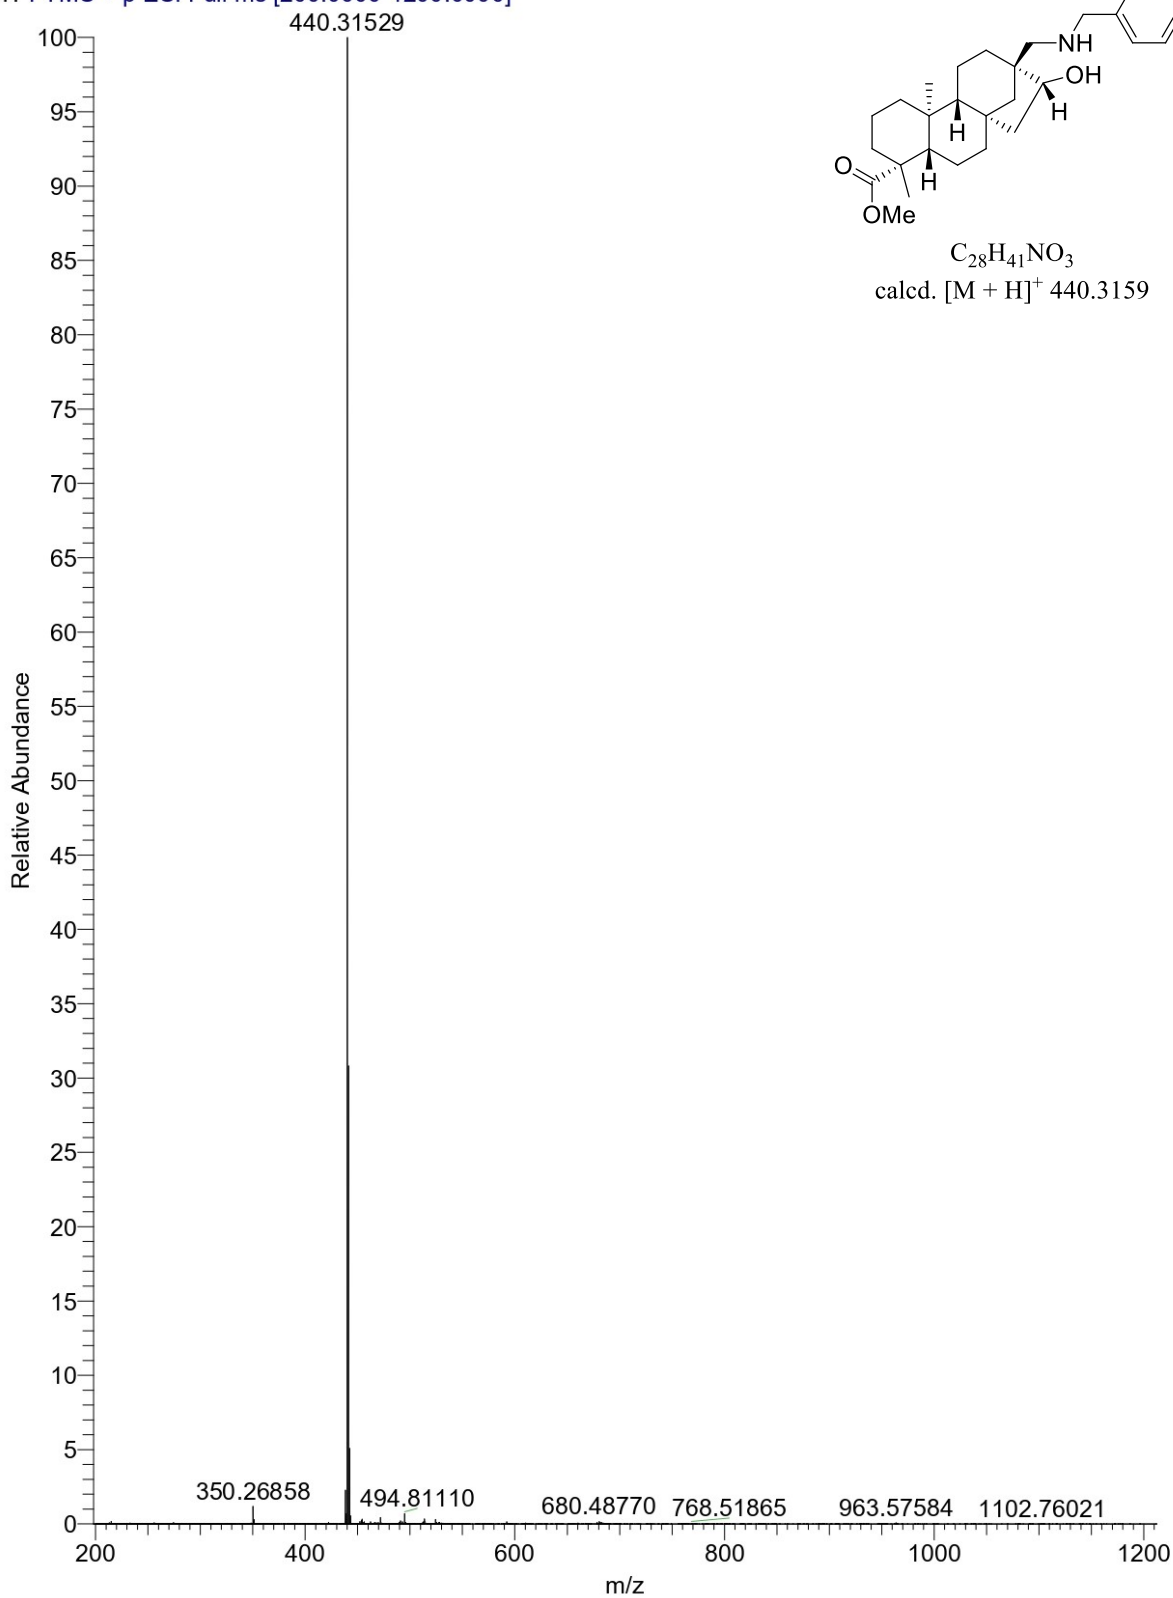

HRMS of compound (4*R*,4*aS*,6*aR*,8*R*,9*S*,11*aR*,11*bS*)-methyl 9-(((4-fluorobenzyl)amino)methyl)-8-hydroxy-4,11*b*-dimethyltetradecahydro-6*a*,9-methanocyclohepta[*a*]naphthalene-4-carboxylate (**23**)

D:\DATA\...\Robi\20230927\GYK-20230927-1  
D3-tol

09/27/23 16:24:56

GYK-20230927-1 #47446-47511 RT: 105.33-105.47 AV: 66 NL: 5.46E8

T: FTMS + p ESI Full ms [200.0000-1200.0000]

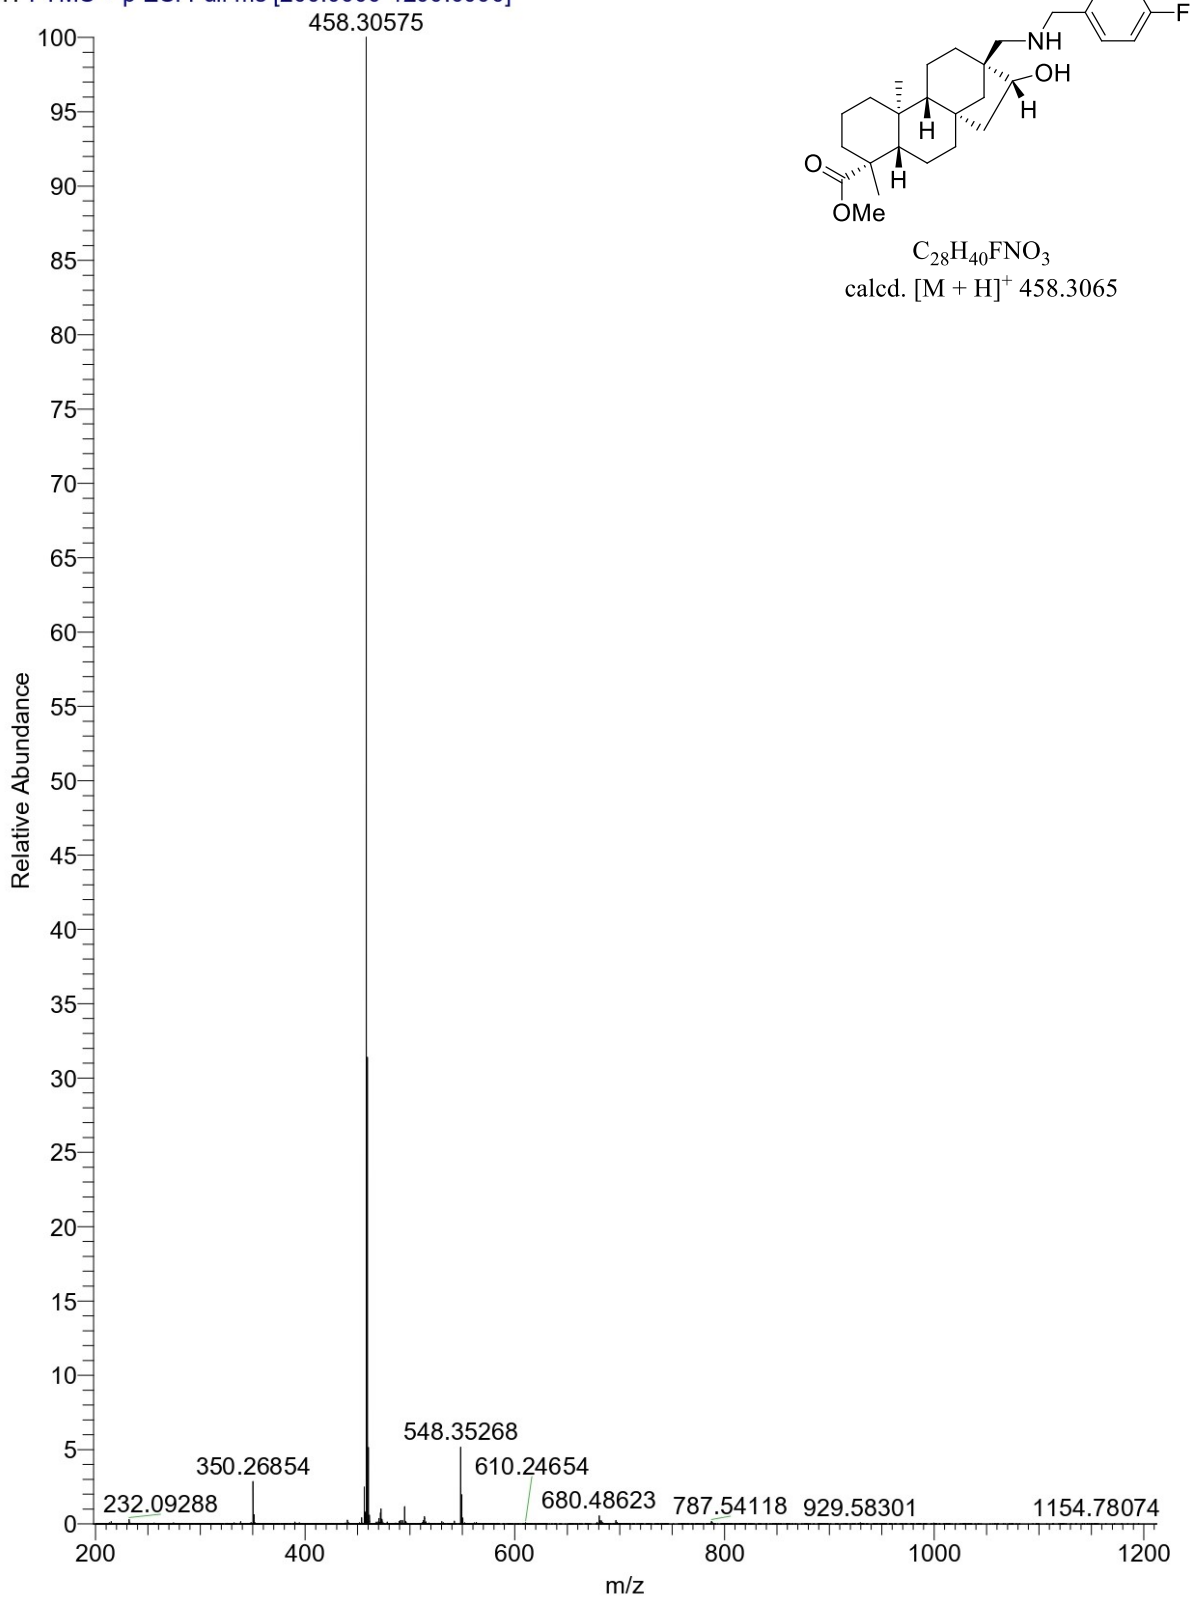

HRMS of compound (4*R*,4*aS*,6*aR*,8*R*,9*S*,11*aR*,11*bS*)-methyl 8-hydroxy-4,11*b*-dimethyl-9-((((*R*)-1-phenylpropyl)amino)methyl)tetradecahydro-6*a*,9-methanocyclohepta[*a*]naphthalene-4-carboxylate (24)

D:\DATA\...IRobil\20230927\GYK-20230927-1  
D3-tol

09/27/23 16:24:56

GYK-20230927-1 #49666-49754 RT: 110.26-110.45 AV: 89 NL: 3.93E8

T: FTMS + p ESI Full ms [200.0000-1200.0000]

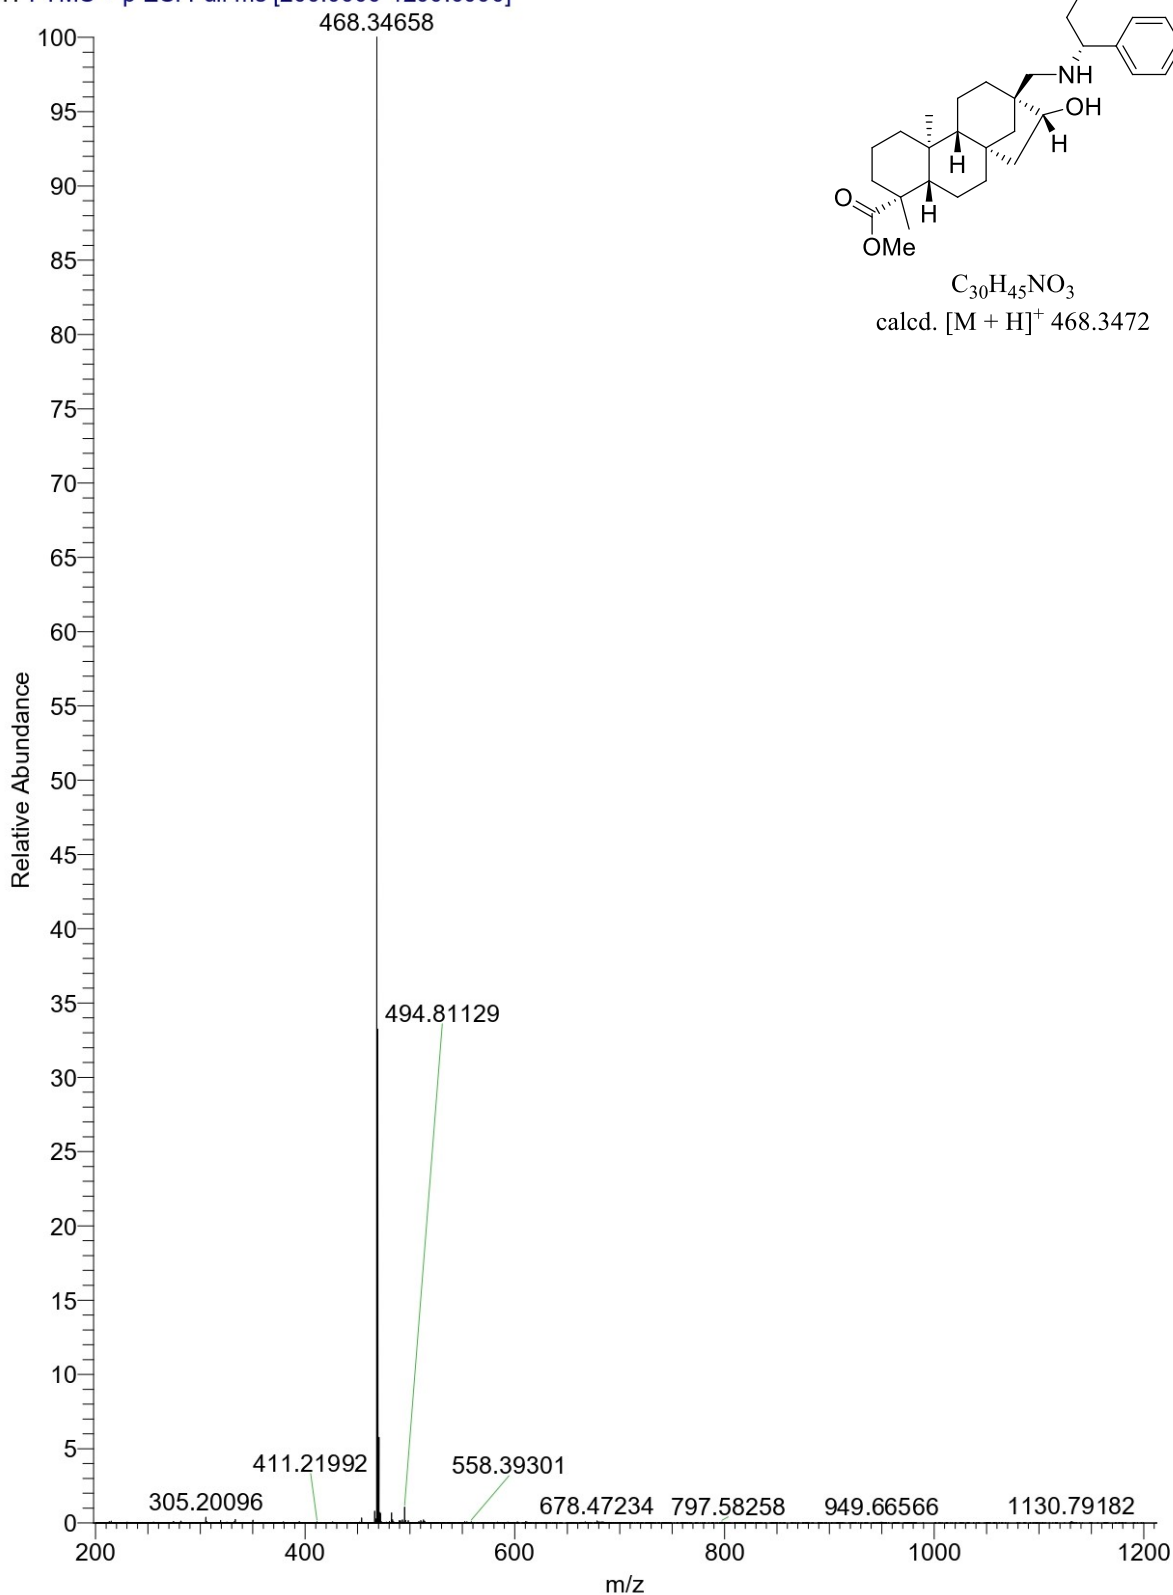

HRMS of compound (4*R*,4*aS*,6*aR*,8*R*,9*S*,11*aR*,11*bS*)-methyl 8-hydroxy-4,11*b*-dimethyl-9-((((*S*)-1-phenylpropyl)amino)methyl)tetradecahydro-6*a*,9-methanocyclohepta[*a*]naphthalene-4-carboxylate (25)

D:\DATA\...IRobil\20230927\GYK-20230927-1  
D3-tol

09/27/23 16:24:56

GYK-20230927-1 #52728-52816 RT: 117.06-117.25 AV: 89 NL: 4.32E8

T: FTMS + p ESI Full ms [200.0000-1200.0000]

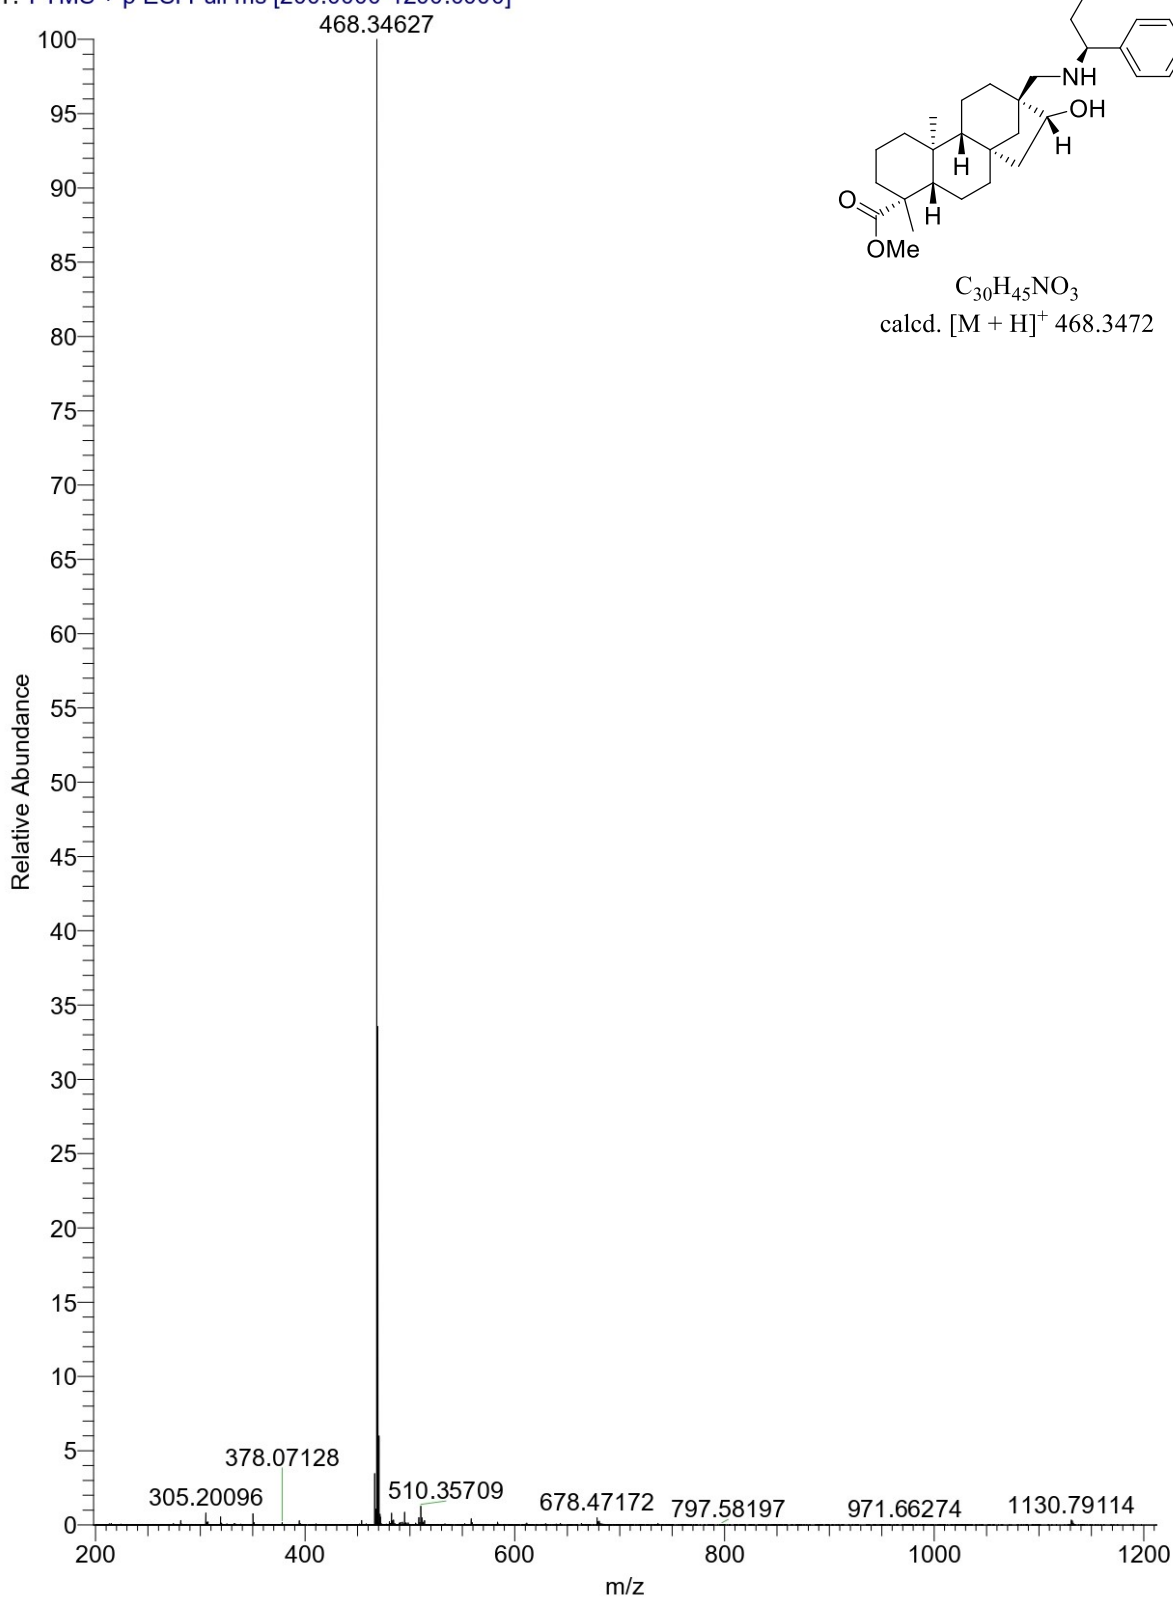



HRMS of compound (4*R*,4*aS*,6*aR*,8*R*,9*S*,11*aR*,11*bS*)-methyl 8-hydroxy-4,11*b*-dimethyl-9-(((naphthalen-1-ylmethyl)amino)methyl)tetradecahydro-6*a*,9-methanocyclohepta[*a*]naphthalene-4-carboxylate (**26**)

D:\DATA\...\Robi\20230927\GYK-20230927-1  
D3-tol

09/27/23 16:24:56

GYK-20230927-1 #50445-50544 RT: 111.99-112.21 AV: 100 NL: 2.73E8

T: FTMS + p ESI Full ms [200.0000-1200.0000]

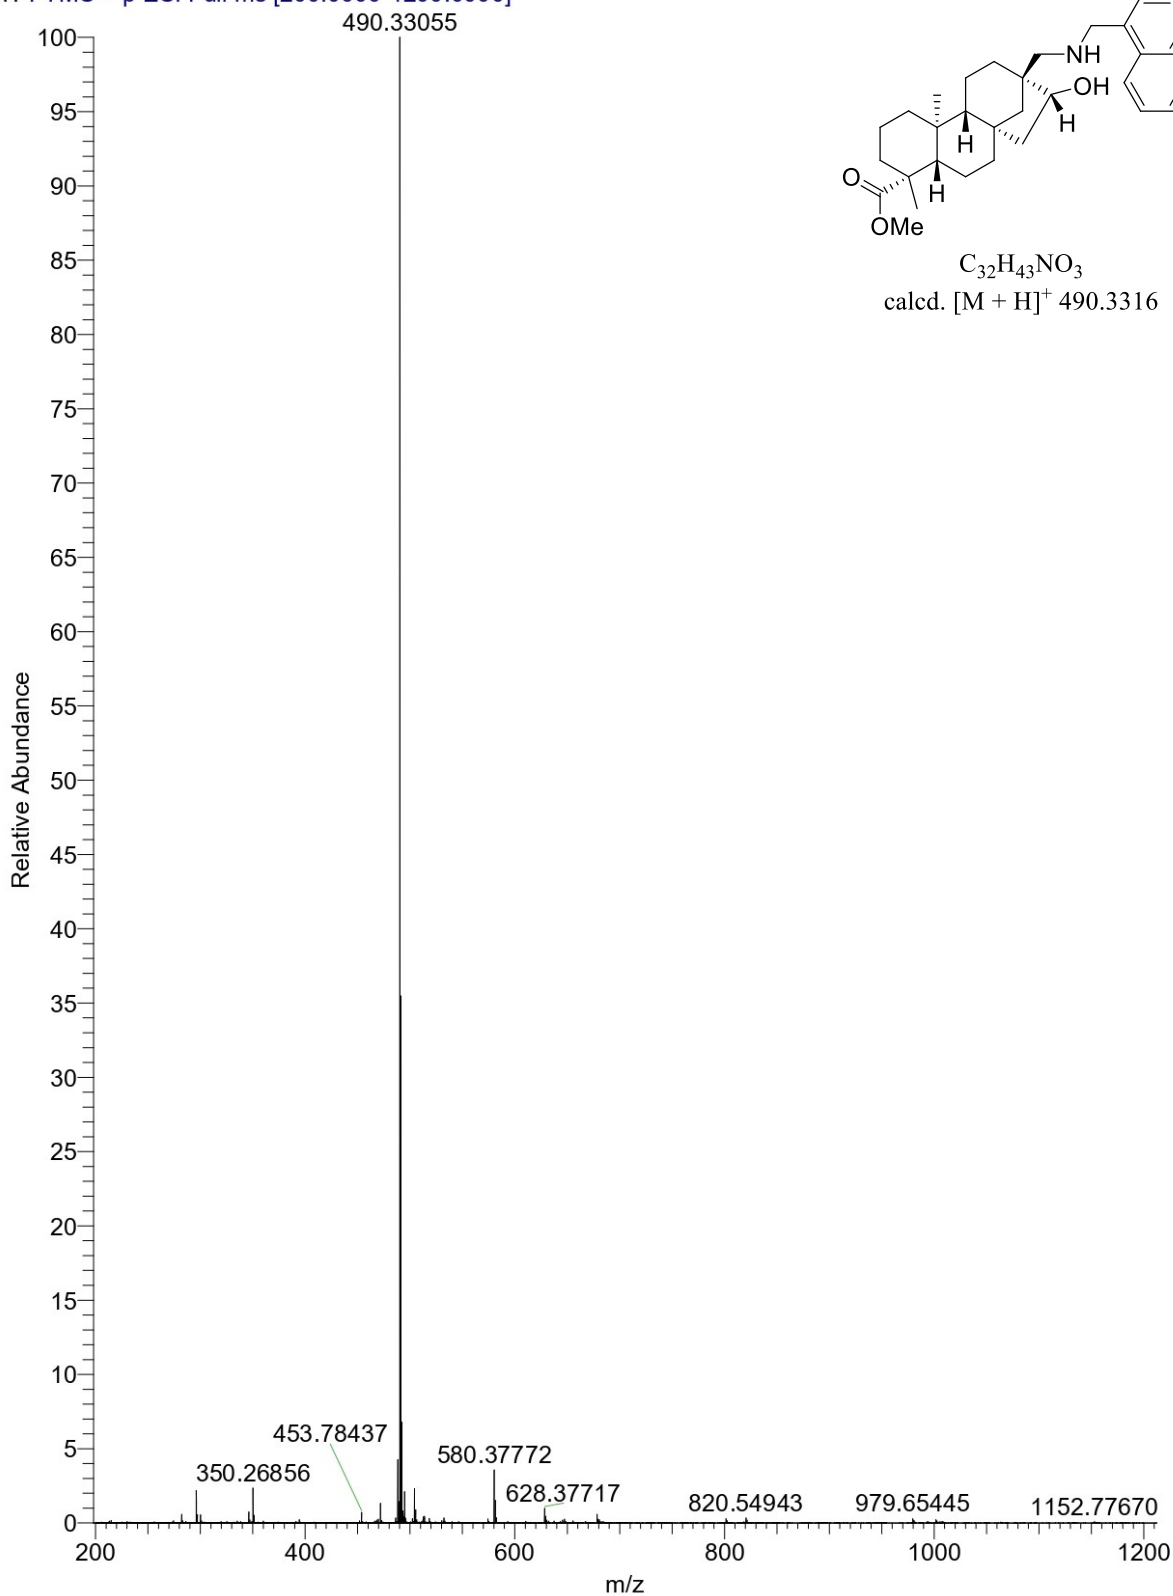

HRMS of compound (4*R*,4*aS*,6*aR*,8*R*,9*S*,11*aR*,11*bS*)-methyl 8-hydroxy-4,11*b*-dimethyl-9-((((*S*)-1-(naphthalen-1-yl)ethyl)amino)methyl)tetradecahydro-6*a*,9-methanocyclohepta[*a*]naphthalene-4-carboxylate (**27**)

D:\DATA\...\Robi\20230927\GYK-20230927-1  
D3-tol

09/27/23 16:24:56

GYK-20230927-1 #53431-53508 RT: 118.62-118.79 AV: 78 NL: 2.50E8

T: FTMS + p ESI Full ms [200.0000-1200.0000]

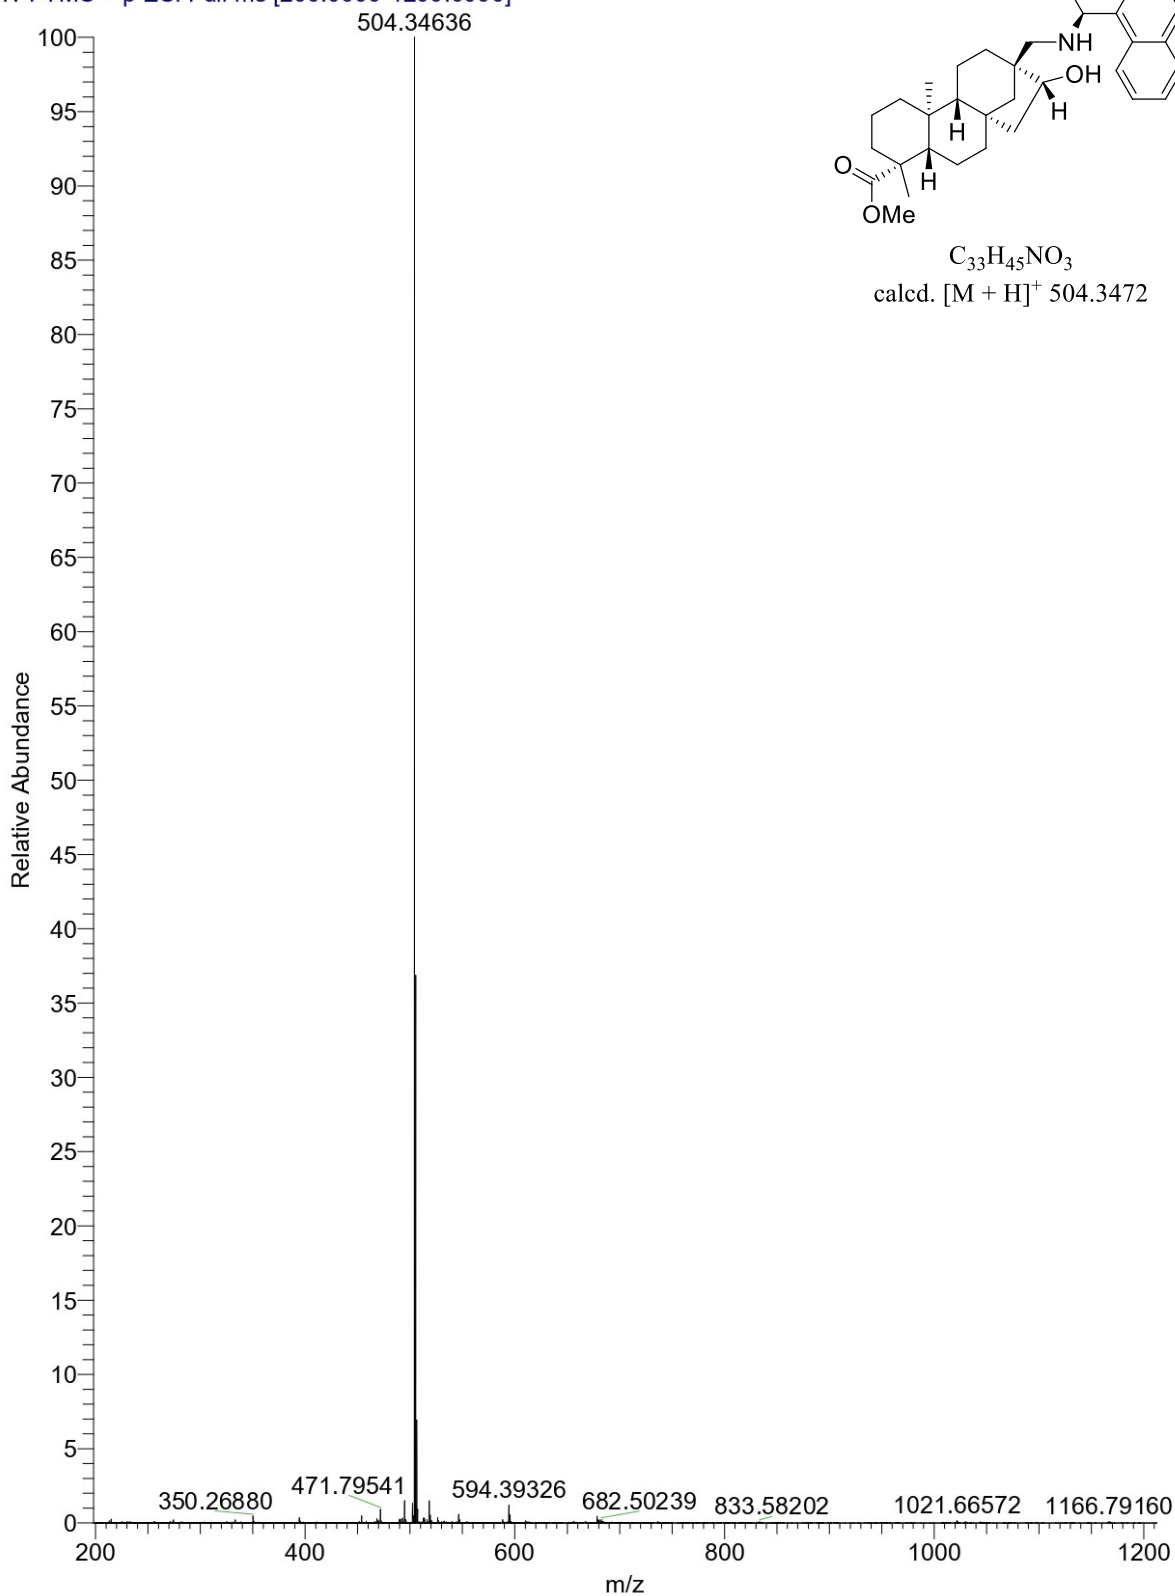

HRMS of compound (4*R*,4*aS*,6*aR*,8*R*,9*S*,11*aR*,11*bS*)-methyl 8-hydroxy-4,11*b*-dimethyl-9-((((*R*)-1-(naphthalen-1-yl)ethyl)amino)methyl)tetradecahydro-6*a*,9-methanocyclohepta[*a*]naphthalene-4-carboxylate (**28**)

D:\DATA\...\Robi\20230927\GYK-20230927-1  
D3-tol

09/27/23 16:24:56

GYK-20230927-1 #54177-54265 RT: 120.27-120.47 AV: 89 NL: 1.75E8

T: FTMS + p ESI Full ms [200.0000-1200.0000]

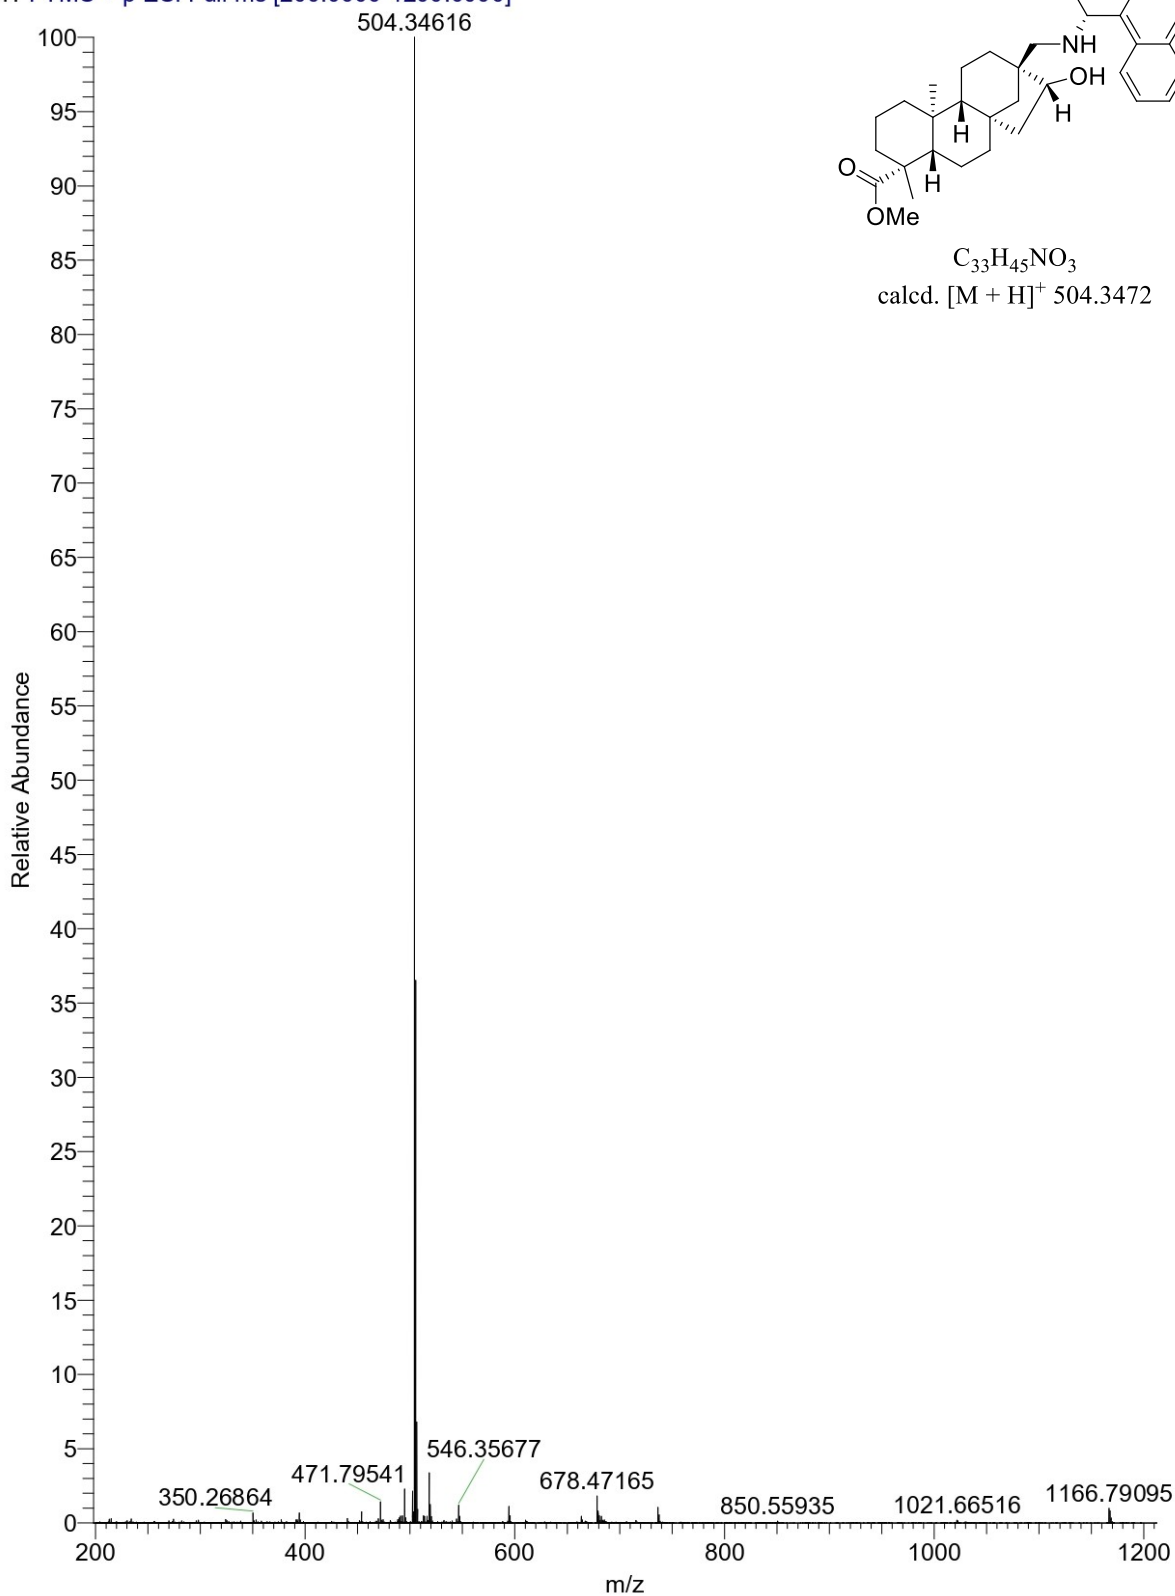

HRMS of compound (4*R*,4*aS*,6*aR*,8*R*,9*S*,11*aR*,11*bS*)-methyl 8-hydroxy-4,11*b*-dimethyl-9-((((*R*)-1-(naphthalen-2-yl)ethyl)amino)methyl)tetradecahydro-6*a*,9-methanocyclohepta[*a*]naphthalene-4-carboxylate (**29**)

D:\DATA\...\Robi\20230927\GYK-20230927-1  
D3-tol

09/27/23 16:24:56

GYK-20230927-1 #54934-55011 RT: 121.95-122.12 AV: 78 NL: 1.50E8

T: FTMS + p ESI Full ms [200.0000-1200.0000]

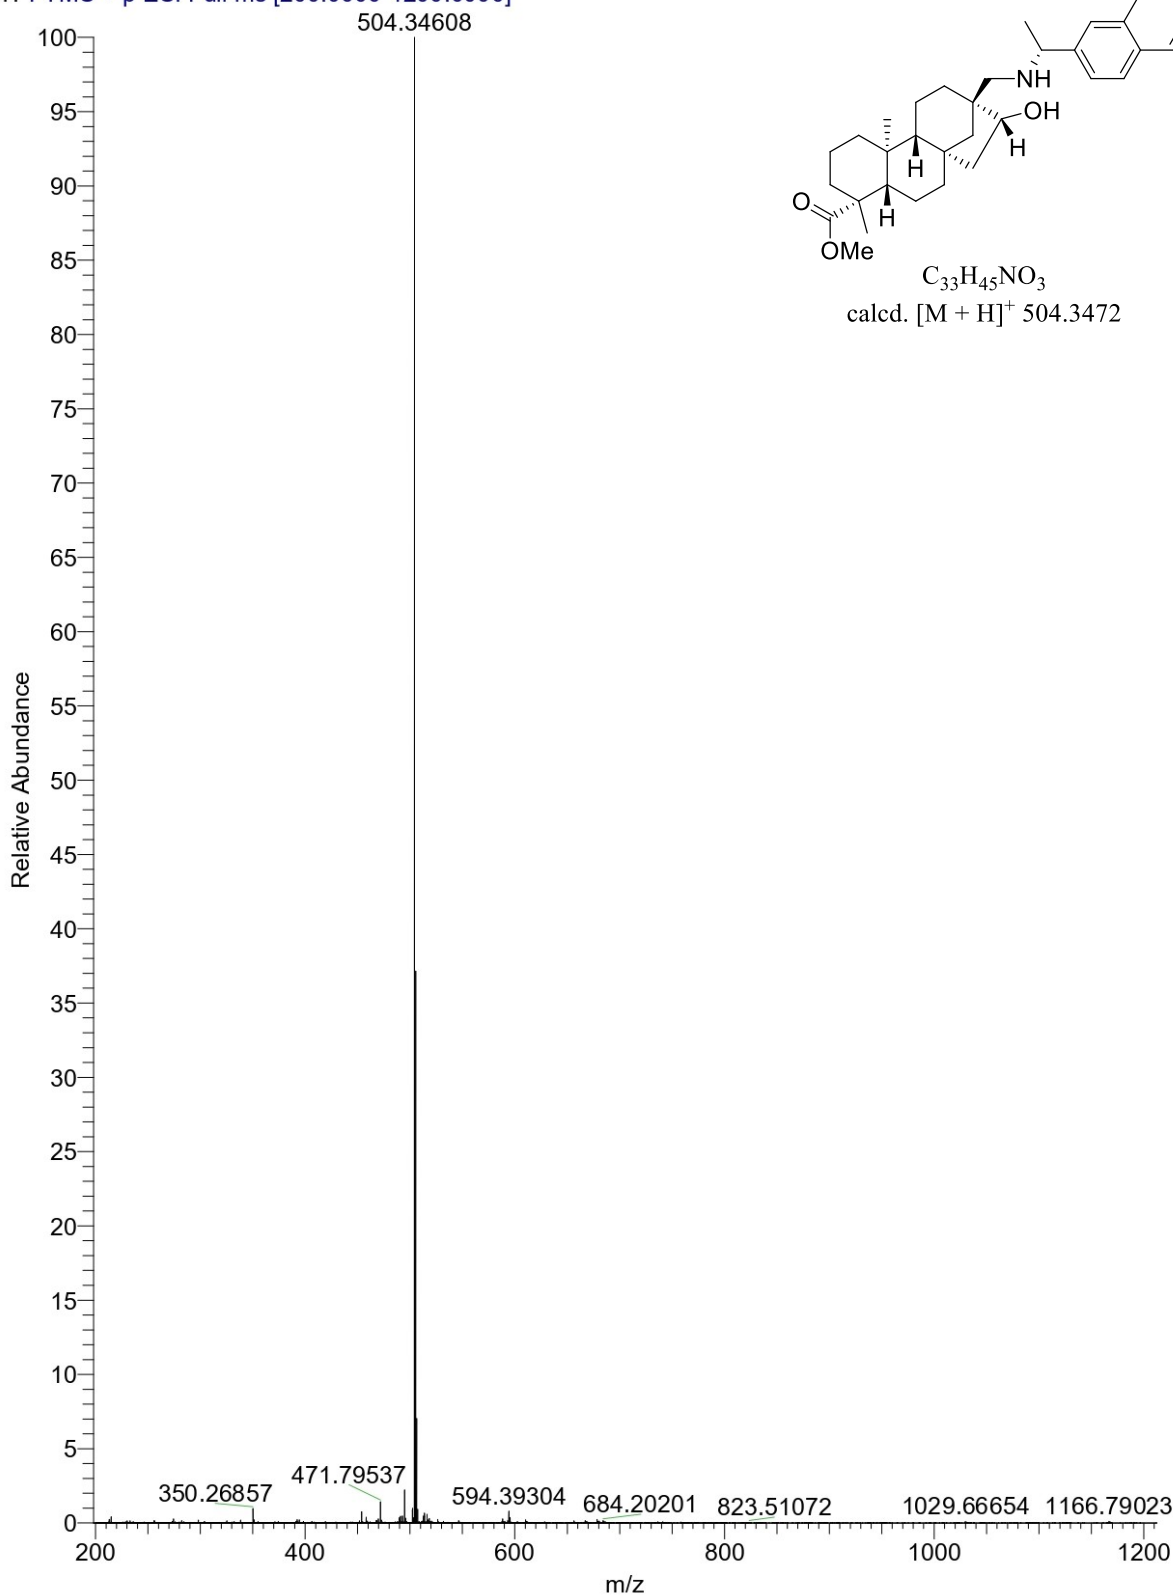

HRMS of compound (4*R*,4*aS*,6*aR*,8*R*,9*S*,11*aR*,11*bS*)-methyl 8-hydroxy-4,11*b*-dimethyl-9-((((*S*)-1-(naphthalen-2-yl)ethyl)amino)methyl)tetradecahydro-6*a*,9-methanocyclohepta[*a*]naphthalene-4-carboxylate (**30**)

D:\DATA\...\Robi\20230927\GYK-20230927-1  
D3-tol

09/27/23 16:24:56

GYK-20230927-1 #55703-55801 RT: 123.66-123.88 AV: 99 NL: 3.89E8

T: FTMS + p ESI Full ms [200.0000-1200.0000]

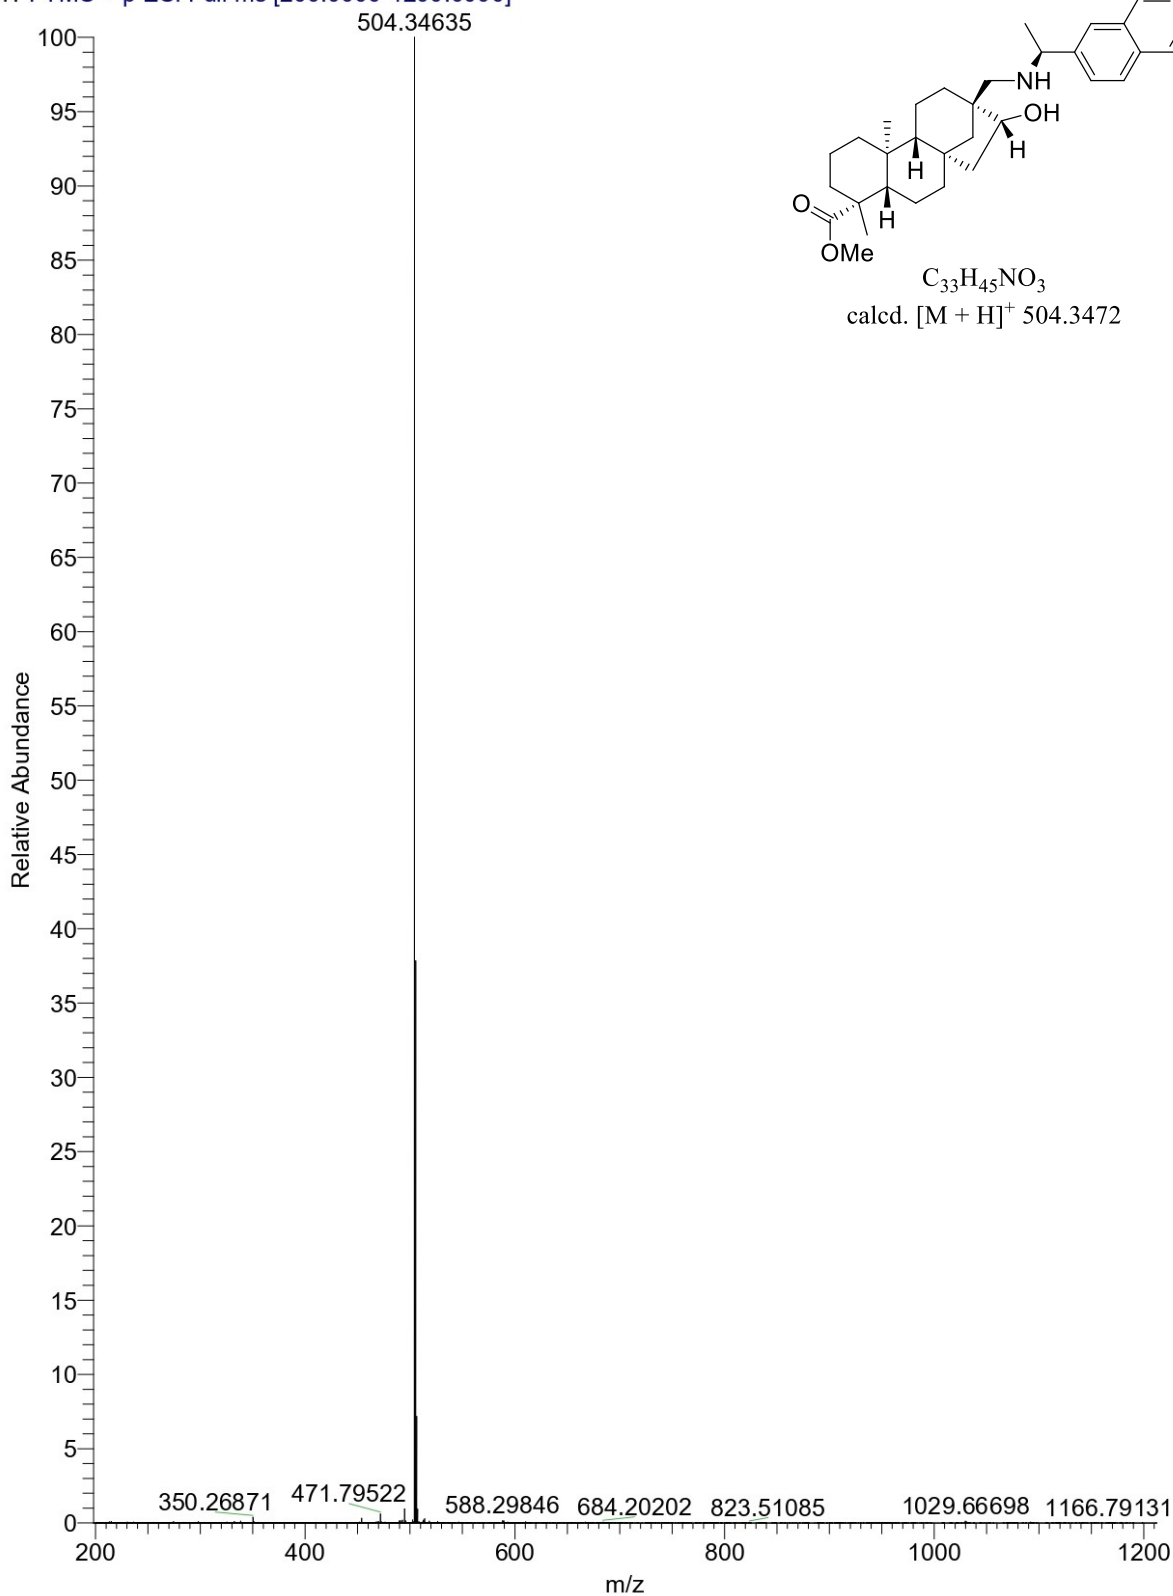

HRMS of compound (4*R*,4*aS*,6*aR*,8*R*,9*S*,11*aR*,11*bS*)-methyl 9-(aminomethyl)-8-hydroxy-4,11*b*-dimethyltetradecahydro-6*a*,9-methanocyclohepta[*a*]naphthalene-4-carboxylate (**31**)

D:\DATAExp\...\20231103\GYK-20230927

11/03/23 11:26:54

FR, HG, HM

GYK-20230927 #5228-5284 RT: 11.60-11.72 AV: 57 NL: 2.04E9

T: FTMS + p ESI Full ms [200.0000-1200.0000]

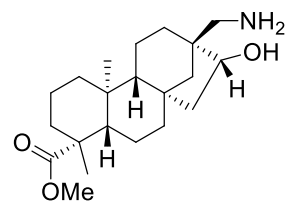

C<sub>21</sub>H<sub>35</sub>NO<sub>3</sub>

calcd. [M + H]<sup>+</sup> 350.2690

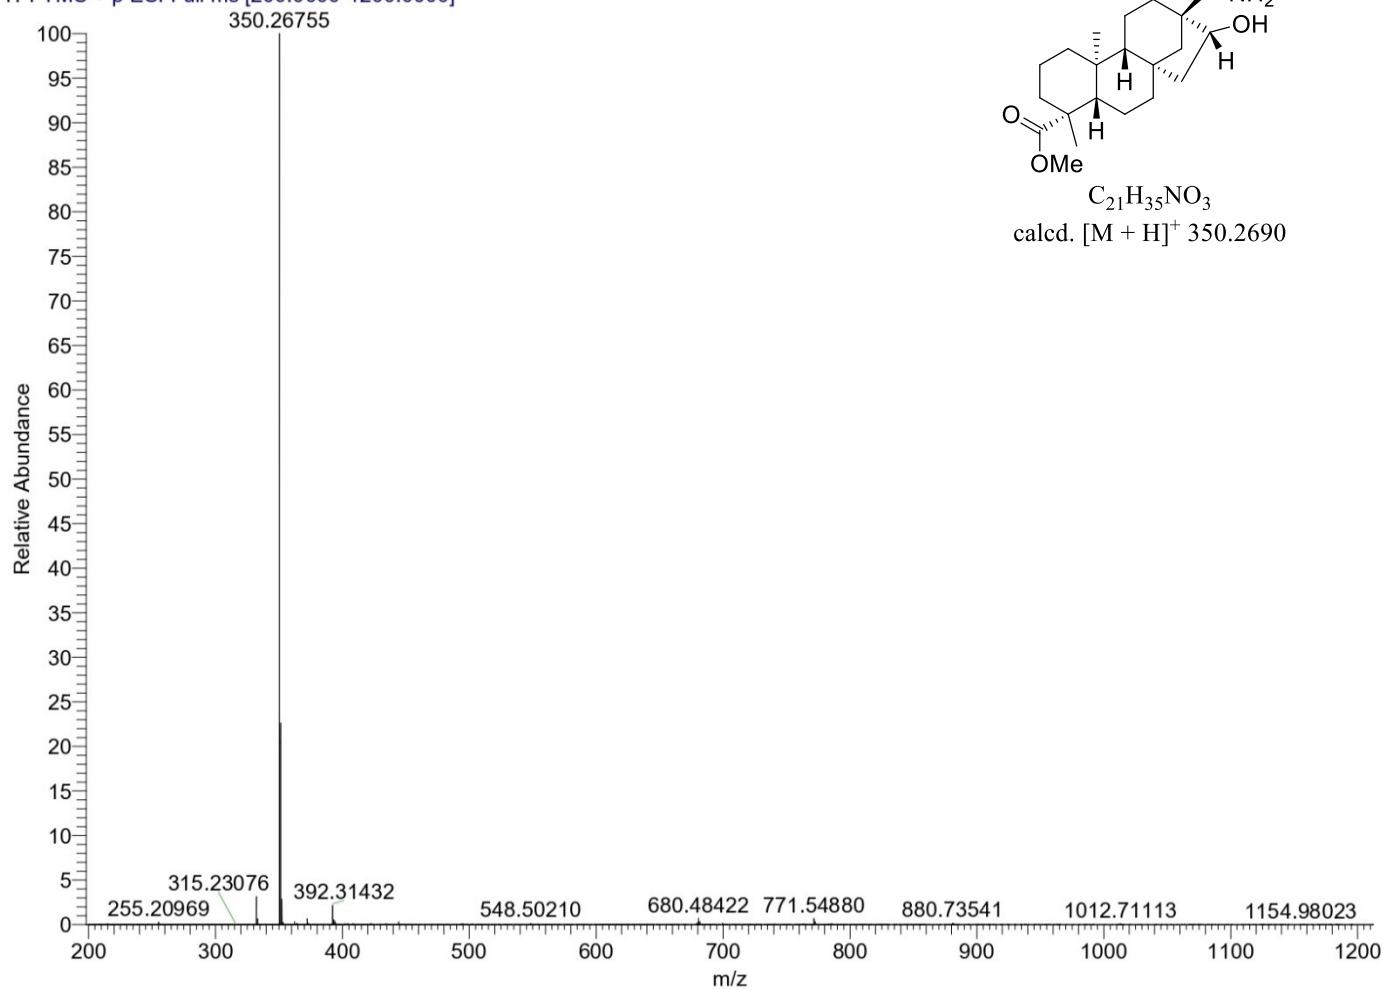

HRMS of compound (4*R*,4*a**S*,6*a**R*,8*R*,9*S*,11*a**R*,11*b**S*)-methyl 8-hydroxy-9-(((4-methoxybenzyl)amino) methyl)-4,11*b*-dimethyltetradecahydro-6*a*,9-methanocyclohepta[*a*]naphthalene-4-carboxylate (**32**)

D:\DATAExp\...\20231103\GYK-20230927  
FR, HG, HM

11/03/23 11:26:54

GYK-20230927 #5967-6026 RT: 13.24-13.37 AV: 60 NL: 2.03E9

T: FTMS + p ESI Full ms [200.0000-1200.0000]

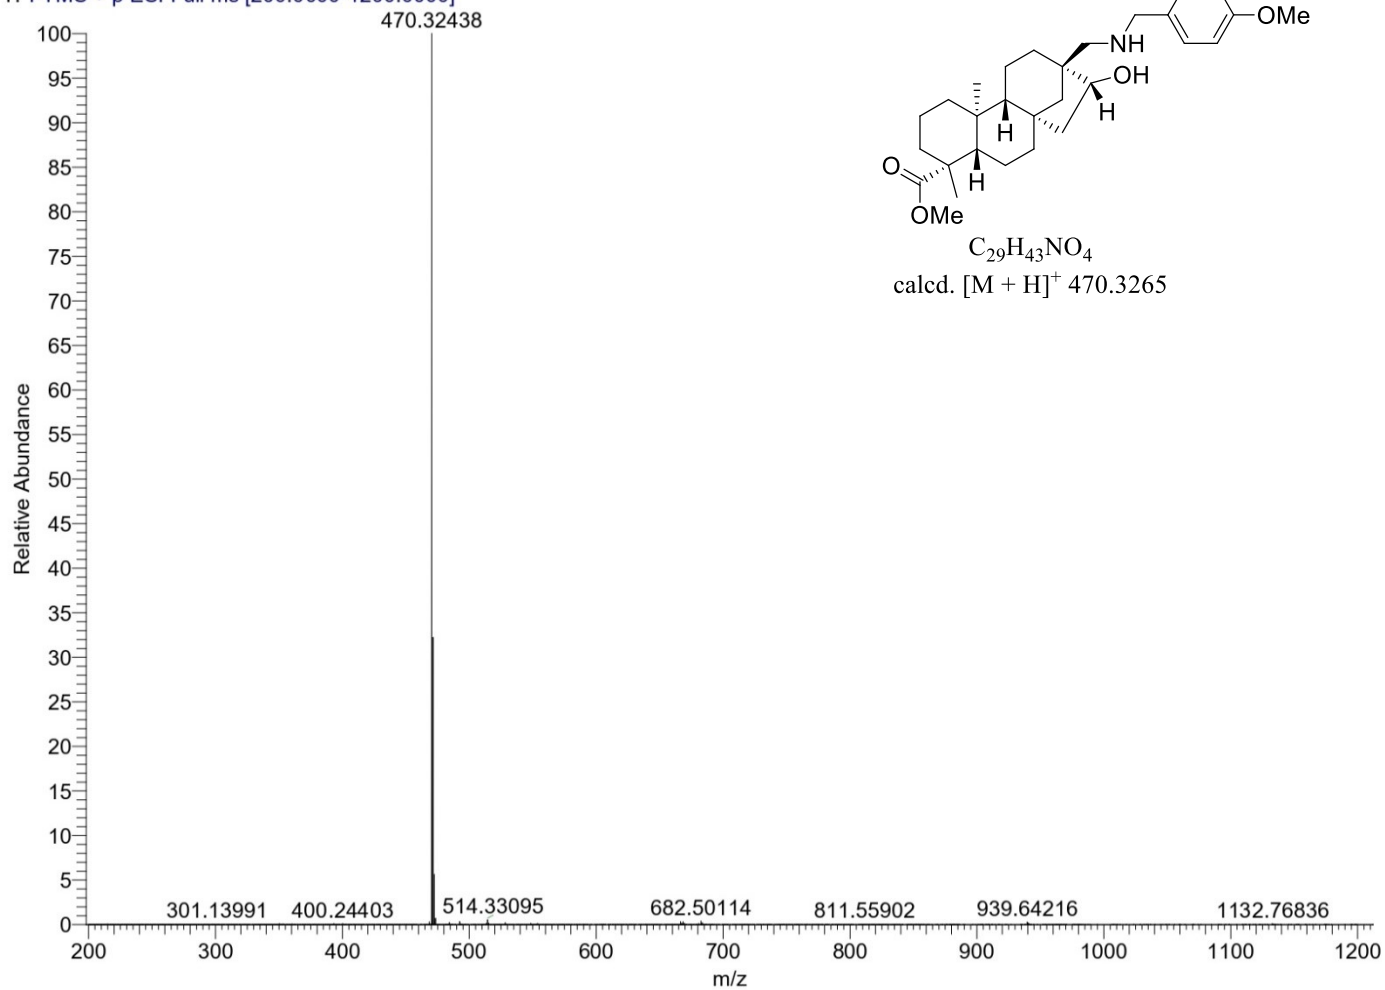

HRMS of compound (4*R*,4*aS*,6*aR*,9*S*,11*aR*,11*bS*)-methyl 4,11*b*-dimethyl-8-oxo-9-((4-phenyl-1*H*-1,2,3-triazol-1-yl)methyl)tetradecahydro-6*a*,9-methanocyclohepta[*a*]naphthalene-4-carboxylate (**33**)

D:\DATA\...\Robi\20230927\GYK-20230927-1  
D3-tol

09/27/23 16:24:56

GYK-20230927-1 #51214-51291 RT: 113.69-113.86 AV: 78 NL: 2.89E8

T: FTMS + p ESI Full ms [200.0000-1200.0000]

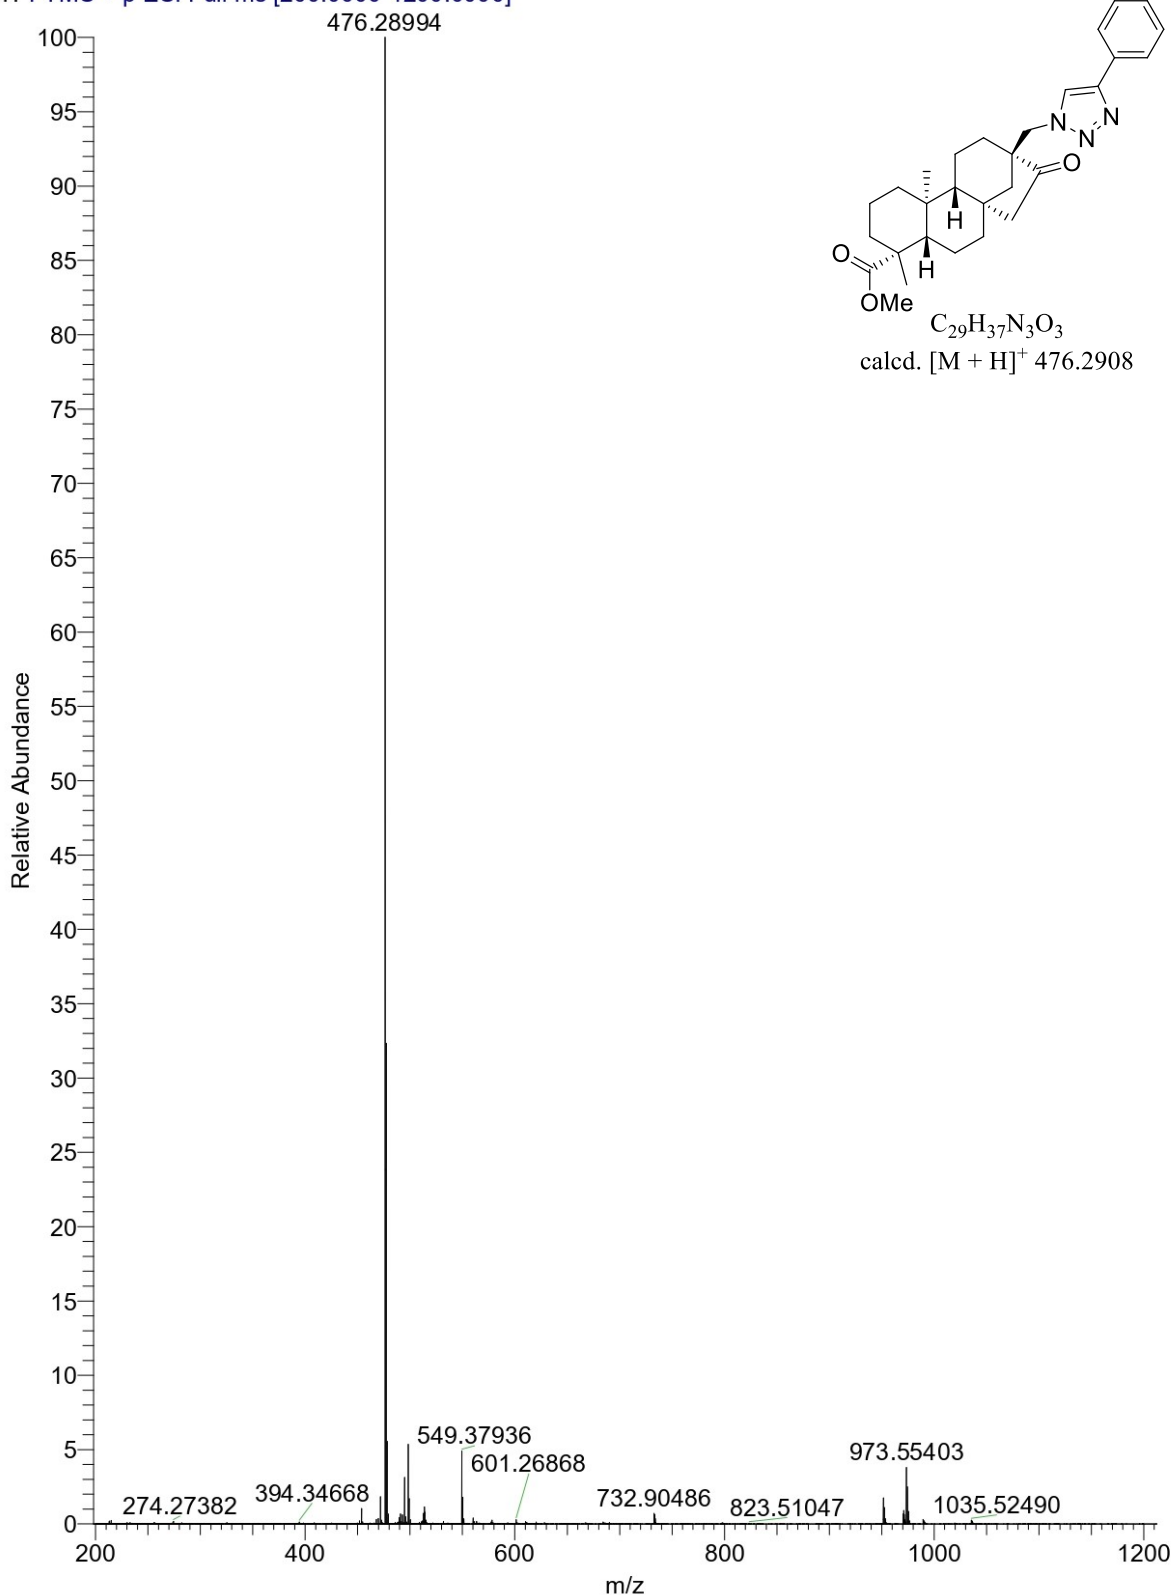



HRMS of compound (4*R*,4*aS*,6*aR*,9*S*,11*aR*,11*bS*)-methyl 9-((4-benzyl-1*H*-1,2,3-triazol-1-yl)methyl)-4,11*b*-dimethyl-8-oxotetradecahydro-6*a*,9-methanocyclohepta[*a*]naphthalene-4-carboxylate (**34**)

D:\DATA\...\Robi\20230927\GYK-20230927-1  
D3-tol

09/27/23 16:24:56

GYK-20230927-1 #51960-52037 RT: 115.35-115.52 AV: 78 NL: 2.47E8

T: FTMS + p ESI Full ms [200.0000-1200.0000]

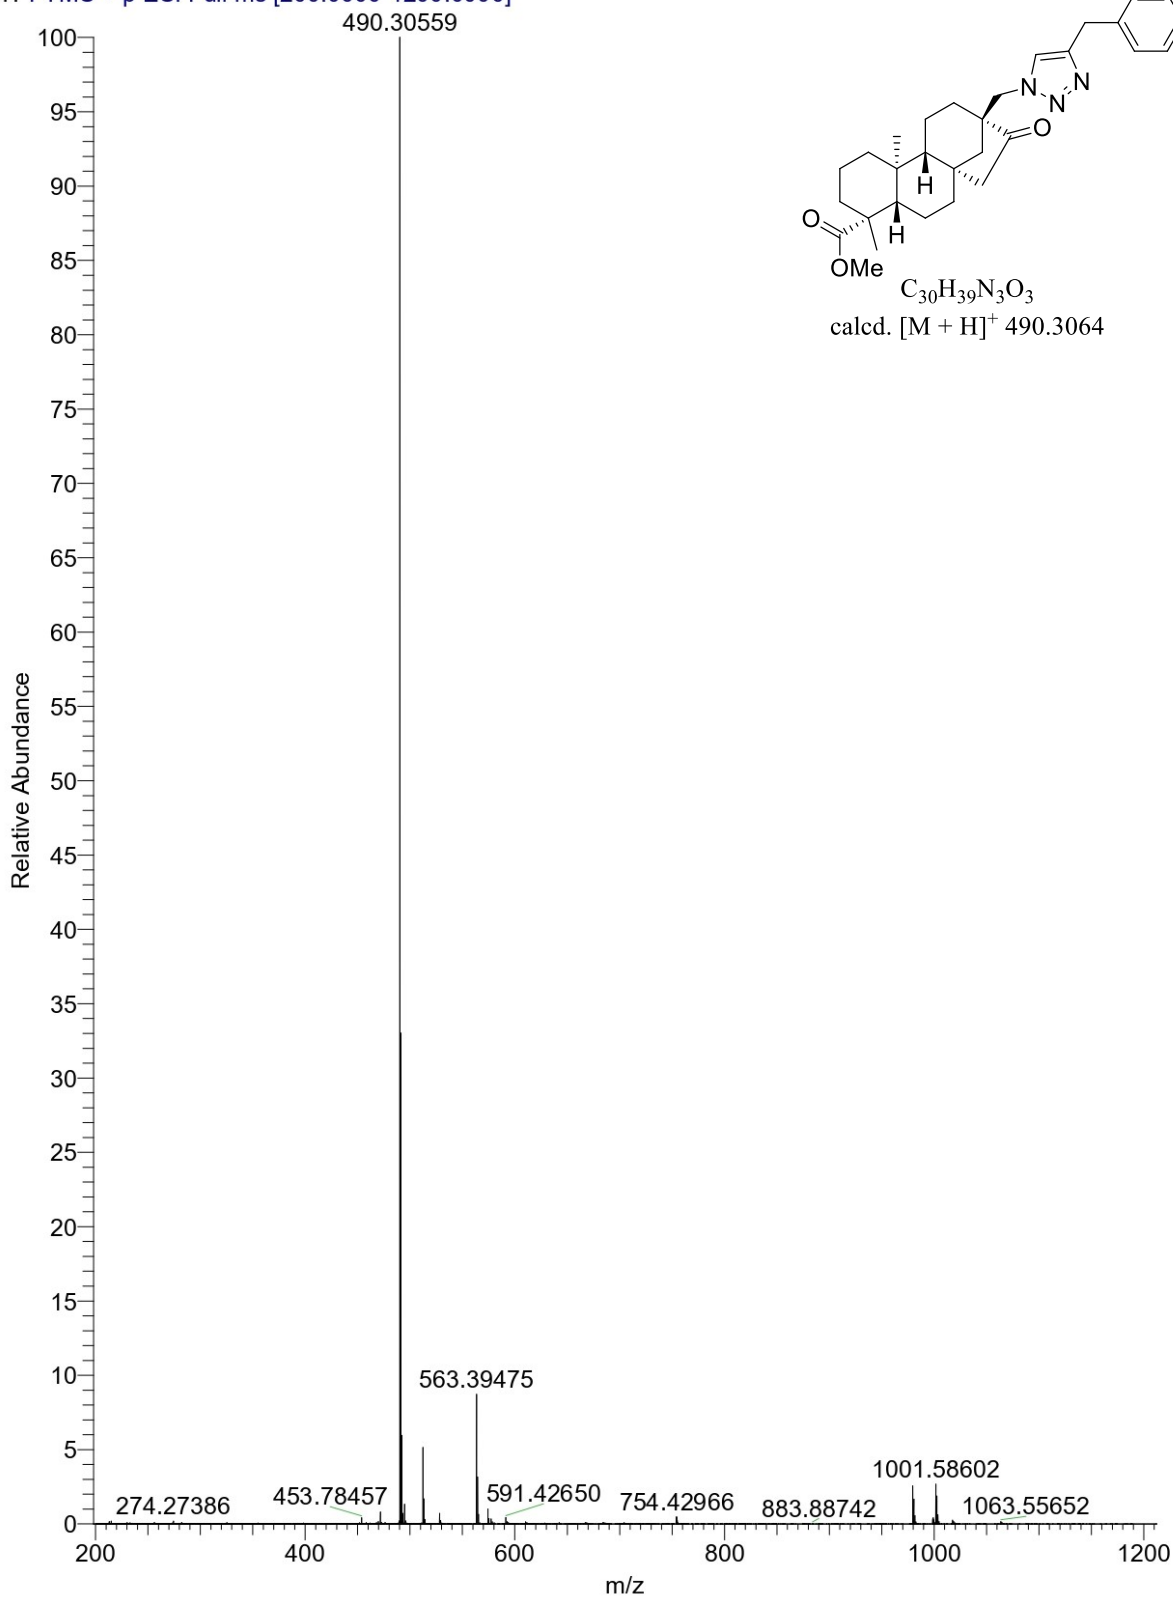

HRMS of compound (4*R*,4*aS*,6*aR*,8*R*,9*S*,11*aR*,11*bS*)-methyl 8-hydroxy-4,11*b*-dimethyl-9-((4-phenyl-1*H*-1,2,3-triazol-1-yl)methyl)tetradecahydro-6*a*,9-methanocyclohepta[*a*]naphthalene-4-carboxylate (35)

D:\DATA\...IRobil\20230927\GYK-20230927-1  
D3-tol

09/27/23 16:24:56

GYK-20230927-1 #48168-48213 RT: 106.93-107.03 AV: 46 NL: 1.46E8

T: FTMS + p ESI Full ms [200.0000-1200.0000]

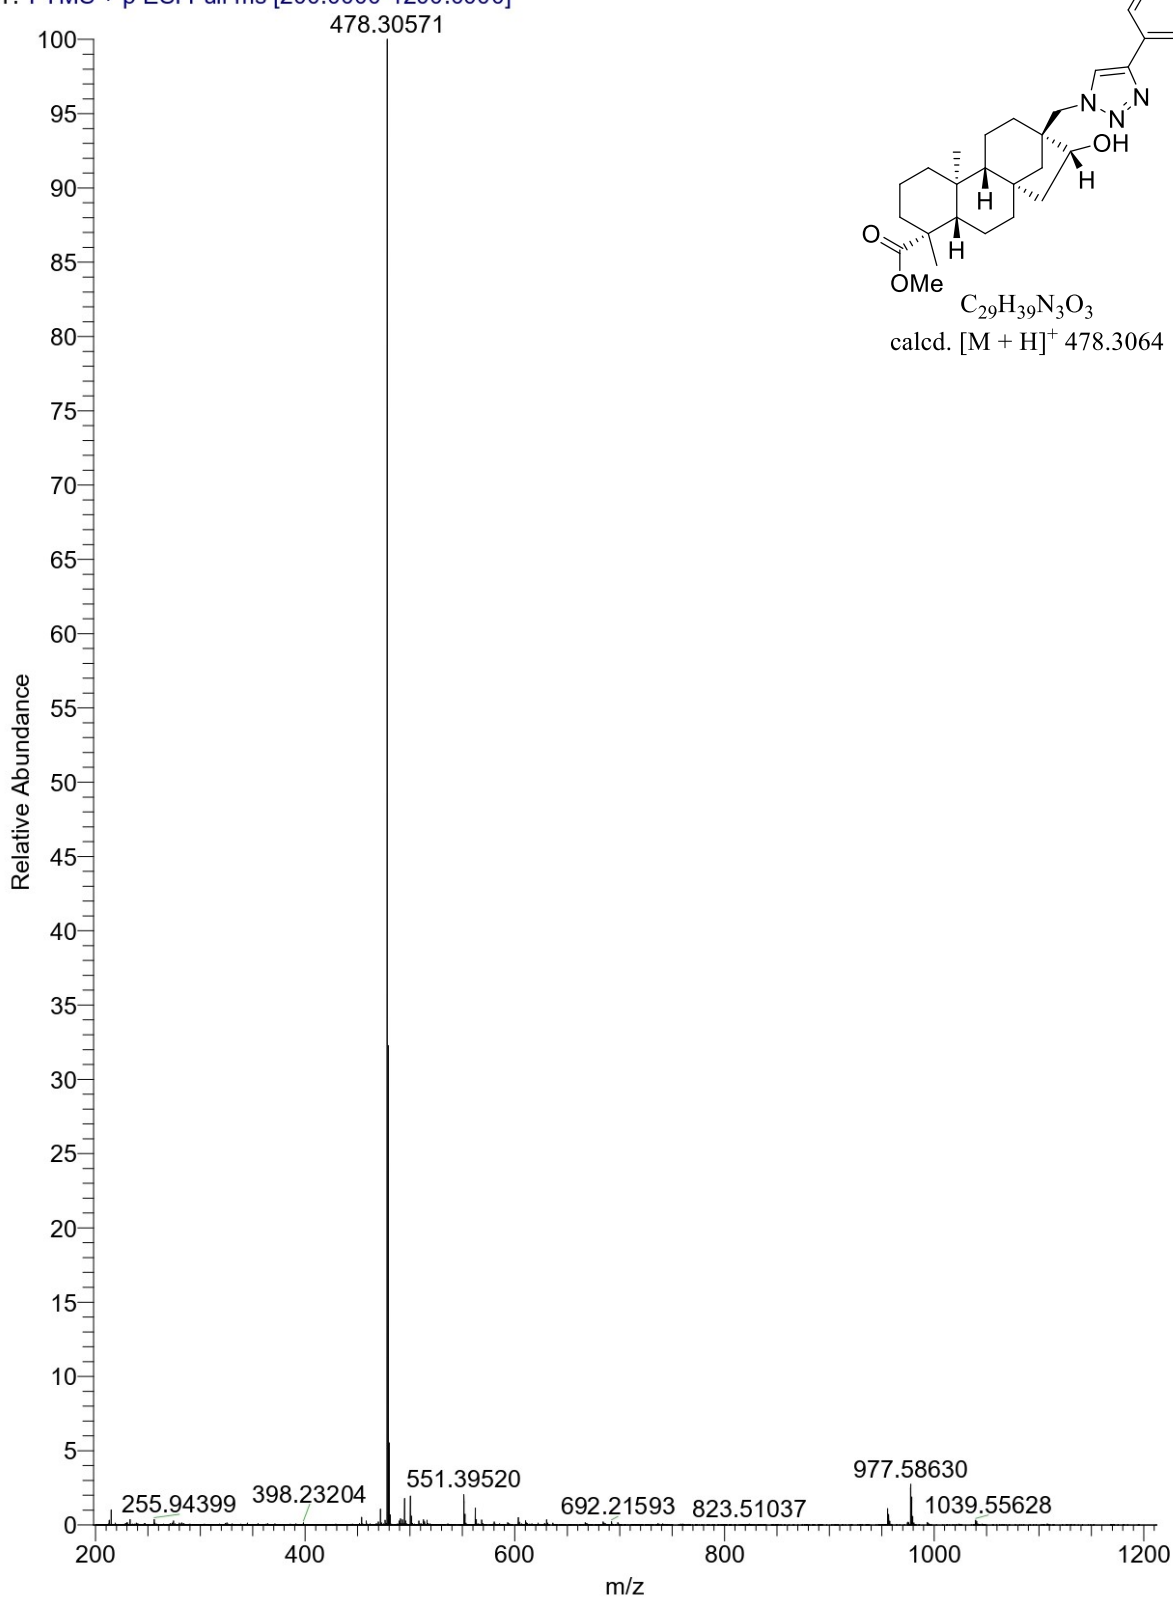

HRMS of compound (4*R*,4*aS*,6*aR*,8*R*,9*S*,11*aR*,11*bS*)-methyl 9-((4-benzyl-1*H*-1,2,3-triazol-1-yl)methyl)-8-hydroxy-4,11*b*-dimethyltetradecahydro-6*a*,9-methanocyclohepta[*a*]naphthalene-4-carboxylate (**36**)

D:\DATA\...\Robi\20230927\GYK-20230927-1  
D3-tol

09/27/23 16:24:56

GYK-20230927-1 #48930-48996 RT: 108.62-108.77 AV: 67 NL: 1.85E8

T: FTMS + p ESI Full ms [200.0000-1200.0000]

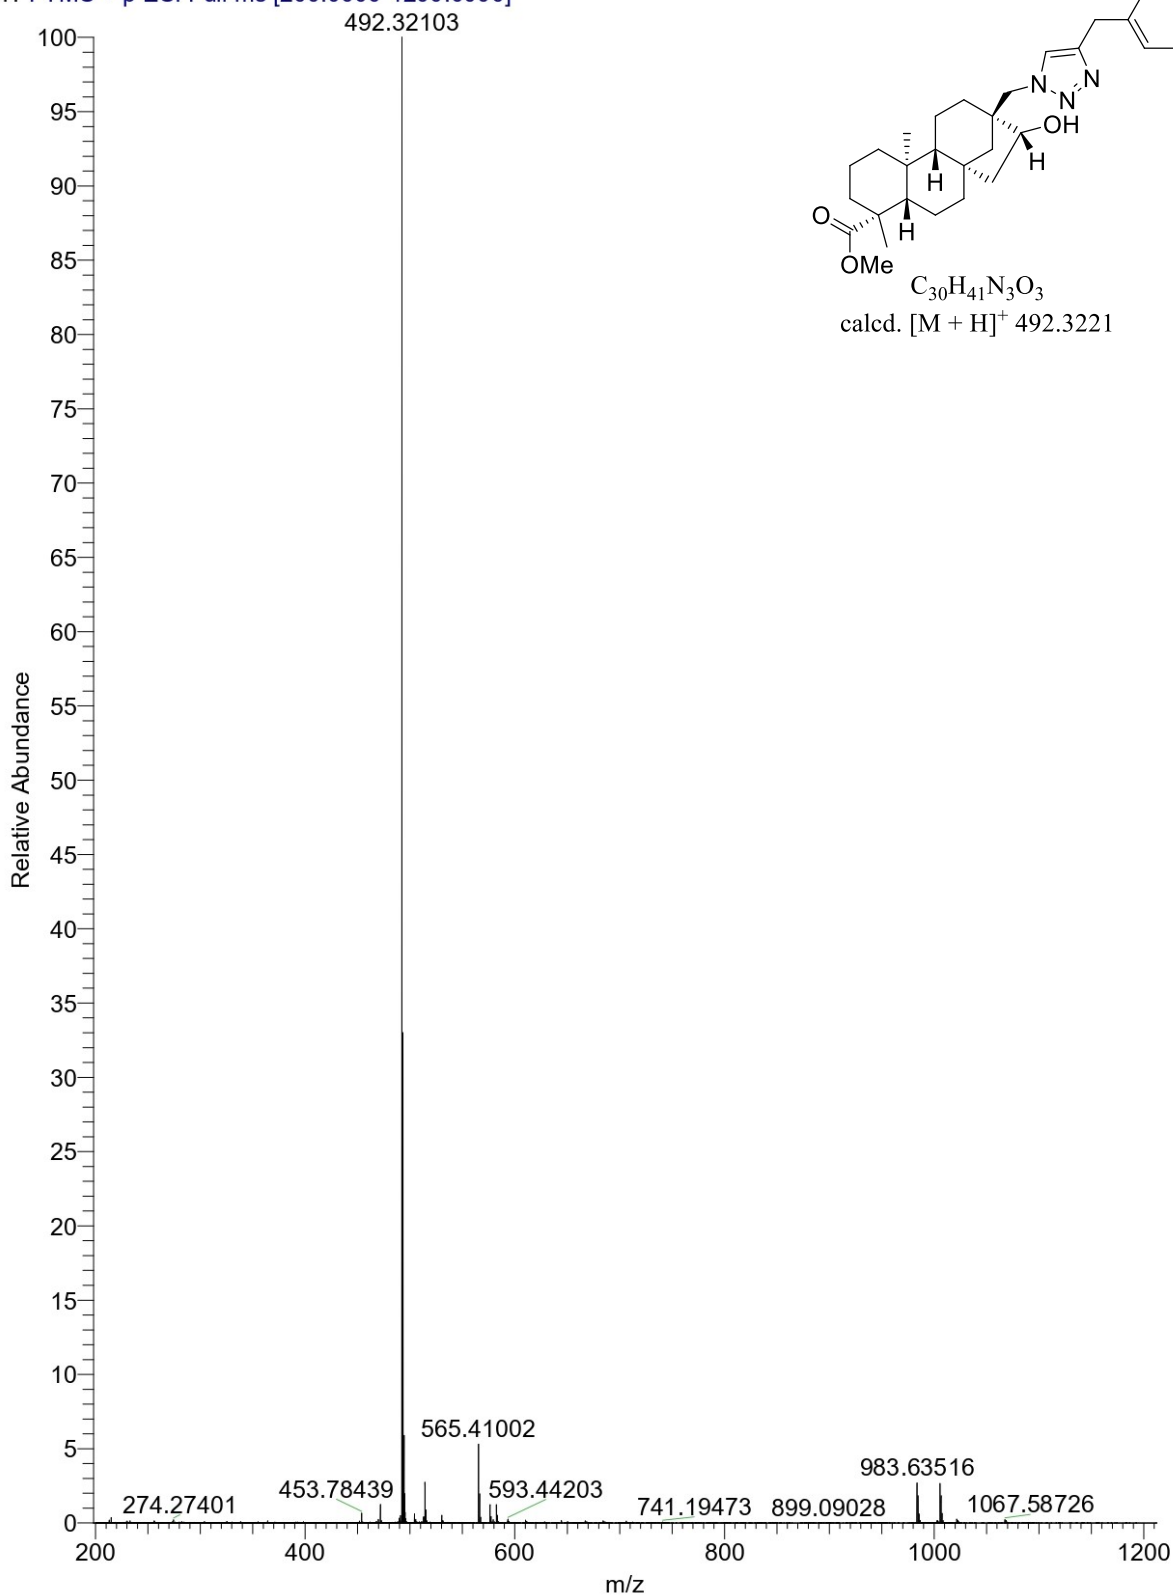

Supplement: s1 [file s1]
